# Supplementary material for: Functionally refined encoding of threat memory by distinct populations of basal forebrain cholinergic projection neurons
Source: eLife. 2024 Feb 16;13:e86581. doi: 10.7554/eLife.86581 (PMC10928508; doi:10.7554/eLife.86581)
Supplement: Figure 1—figure supplement 2—source data 1. [file elife-86581-fig1-figsupp2-data1.xlsx]

## Sheet: Tone Only training
Time(s)	Tone 1	Tone 1	Tone 1	Tone 1	Tone 1		Tone 2	Tone 2	Tone 2	Tone 2	Tone 2		Tone 3	Tone 3	Tone 3	Tone 3	Tone 3		24hTone	24hTone	24hTone	24hTone	24hTone
	Mouse 1	Mouse 2	Mouse 3	Mouse 4	Mouse 5		Mouse 1	Mouse 2	Mouse 3	Mouse 4	Mouse 5		Mouse 1	Mouse 2	Mouse 3	Mouse 4	Mouse 5		Mouse 1	Mouse 2	Mouse 3	Mouse 4	Mouse 5
-4.99941	-0.01076	0.093966	-1.36534	-1.92613	-1.0125		0.253875	-0.31298	1.41364	-0.37688	0.972517		-1.37339	-0.06467	-0.92648	1.12471	0.469769		-0.27903	-0.63155	-0.20463	0.860863	0.348079
-4.99129	-0.09061	0.083792	-1.34562	-1.9225	-1.0246		0.322371	-0.33954	1.35618	-0.47946	1.17678		-1.34521	-0.00172	-0.98639	1.03204	0.405027		-0.26935	-0.684	-0.21817	0.914254	0.307537
-4.98308	-0.13653	0.048353	-1.34661	-1.9309	-1.05854		0.354327	-0.34027	1.28136	-0.5933	1.29425		-1.32482	0.042453	-1.06259	0.852818	0.375482		-0.28459	-0.7115	-0.22713	0.827099	0.299076
-4.97488	-0.14891	0.009669	-1.3579	-1.94255	-1.11351		0.340759	-0.34433	1.19629	-0.74612	1.31688		-1.28721	0.044517	-1.12267	0.655258	0.397891		-0.2991	-0.71183	-0.2343	0.643349	0.310844
-4.96668	-0.1545	-0.00974	-1.34887	-1.94809	-1.16924		0.30349	-0.35194	1.12211	-0.94648	1.27692		-1.21672	-0.00153	-1.15035	0.536516	0.442729		-0.29418	-0.68537	-0.24781	0.455798	0.329726
-4.95847	-0.17554	-0.00936	-1.30119	-1.92359	-1.20907		0.276854	-0.34223	1.08178	-1.13727	1.22441		-1.11999	-0.06877	-1.14311	0.545837	0.462706		-0.27676	-0.62899	-0.27374	0.354092	0.344813
-4.95027	-0.21117	-0.00619	-1.21825	-1.85738	-1.22678		0.279167	-0.31372	1.08816	-1.25931	1.19264		-1.00639	-0.11318	-1.1132	0.669217	0.435533		-0.26123	-0.54856	-0.30276	0.348051	0.340264
-4.94207	-0.24104	-0.02075	-1.11676	-1.77878	-1.20872		0.295573	-0.28133	1.13316	-1.28913	1.17516		-0.89103	-0.11867	-1.08324	0.820894	0.380551		-0.26304	-0.46932	-0.33115	0.39655	0.304447
-4.93387	-0.26003	-0.05276	-1.01828	-1.73362	-1.14255		0.299574	-0.27346	1.19143	-1.25952	1.13839		-0.78697	-0.11949	-1.06254	0.890592	0.326915		-0.28031	-0.40661	-0.36539	0.463573	0.248749
-4.92566	-0.27194	-0.07419	-0.9305	-1.74661	-1.02912		0.280121	-0.30215	1.245	-1.20011	1.06914		-0.69874	-0.16183	-1.05447	0.844531	0.292506		-0.29359	-0.36902	-0.40978	0.529252	0.188456
-4.91746	-0.28442	-0.06299	-0.85529	-1.77608	-0.90784		0.245535	-0.36048	1.28797	-1.12468	0.975207		-0.62261	-0.26618	-1.05917	0.728261	0.272403		-0.28352	-0.34181	-0.45567	0.605439	0.14599
-4.90926	-0.30469	-0.01835	-0.79334	-1.76186	-0.84392		0.214976	-0.43353	1.32303	-1.0643	0.879118		-0.55523	-0.40145	-1.07969	0.6033	0.258608		-0.26407	-0.31401	-0.47992	0.695534	0.142136
-4.90105	-0.34492	0.037675	-0.75482	-1.68673	-0.86407		0.187386	-0.48963	1.34565	-1.05567	0.79599		-0.50619	-0.52009	-1.11823	0.489218	0.257316		-0.28218	-0.28328	-0.47117	0.790831	0.172518
-4.89293	-0.41706	0.073778	-0.74939	-1.60563	-0.93384		0.154066	-0.51619	1.35054	-1.13071	0.72168		-0.47738	-0.594	-1.16478	0.38919	0.27891		-0.35151	-0.25706	-0.4484	0.880501	0.200726
-4.88473	-0.49901	0.073494	-0.76574	-1.5985	-0.98779		0.1094	-0.51842	1.32963	-1.25955	0.654096		-0.45349	-0.62355	-1.21148	0.324118	0.335283		-0.43588	-0.24502	-0.45127	0.937176	0.193086
-4.87652	-0.54454	0.045253	-0.77532	-1.6879	-1.00408		0.061	-0.5183	1.2811	-1.39369	0.591395		-0.40746	-0.62899	-1.25259	0.315902	0.414834		-0.47407	-0.23374	-0.50278	0.918595	0.155822
-4.86832	-0.52525	0.032461	-0.7496	-1.82603	-1.00804		0.023764	-0.53054	1.21164	-1.51653	0.529151		-0.33847	-0.61607	-1.28937	0.348468	0.485605		-0.4435	-0.21117	-0.57936	0.797251	0.123813
-4.86012	-0.46239	0.064267	-0.68605	-1.91733	-1.02741		-0.00953	-0.5443	1.1239	-1.62474	0.464793		-0.28576	-0.58424	-1.31848	0.359145	0.514189		-0.37776	-0.16885	-0.63629	0.599892	0.119048
-4.85191	-0.41065	0.133708	-0.61281	-1.9145	-1.06993		-0.0545	-0.54022	1.03364	-1.70184	0.414092		-0.29365	-0.53189	-1.32512	0.304107	0.484353		-0.32892	-0.12544	-0.64591	0.382677	0.130607
-4.84371	-0.4084	0.195229	-0.55715	-1.84561	-1.11392		-0.1259	-0.51291	0.958013	-1.72717	0.394817		-0.37034	-0.46783	-1.31237	0.192534	0.416881		-0.3181	-0.12053	-0.62155	0.201201	0.13361
-4.83551	-0.44761	0.192844	-0.52474	-1.768	-1.14069		-0.209	-0.48508	0.914317	-1.72269	0.412309		-0.4651	-0.42316	-1.29795	0.08196	0.341173		-0.31642	-0.17327	-0.58107	0.078238	0.121194
-4.82731	-0.48218	0.116758	-0.49314	-1.72991	-1.14672		-0.2566	-0.48392	0.908558	-1.73827	0.460818		-0.52195	-0.41053	-1.2996	0.029526	0.284197		-0.29527	-0.26046	-0.53179	-0.00649	0.10367
-4.8191	-0.48953	0.002565	-0.43411	-1.72416	-1.13847		-0.24103	-0.52143	0.920459	-1.80069	0.538705		-0.53189	-0.40855	-1.31577	0.040572	0.254195		-0.24721	-0.32079	-0.47253	-0.07108	0.091931
-4.8109	-0.47981	-0.10402	-0.34294	-1.72926	-1.12887		-0.17338	-0.57742	0.927752	-1.88609	0.656229		-0.53284	-0.37246	-1.33005	0.103563	0.236285		-0.1928	-0.31902	-0.41946	-0.13219	0.081814
-4.80278	-0.47364	-0.18435	-0.24163	-1.73336	-1.12598		-0.10234	-0.61976	0.917292	-1.94153	0.812402		-0.56863	-0.28086	-1.32218	0.181596	0.212054		-0.16327	-0.27937	-0.40166	-0.19306	0.069013
-4.79457	-0.48663	-0.24735	-0.16651	-1.73339	-1.13599		-0.06777	-0.63612	0.902153	-1.9426	0.97481		-0.63938	-0.17181	-1.28792	0.23762	0.168257		-0.17291	-0.25933	-0.41516	-0.27953	0.052393
-4.78637	-0.51301	-0.29902	-0.12879	-1.73559	-1.1538		-0.0675	-0.63713	0.901112	-1.89804	1.08851		-0.71857	-0.10152	-1.24188	0.254147	0.126891		-0.21423	-0.29244	-0.43338	-0.41273	0.027107
-4.77817	-0.54078	-0.33737	-0.115	-1.73386	-1.16816		-0.07511	-0.64013	0.924201	-1.83892	1.10633		-0.76803	-0.10628	-1.20054	0.235397	0.123731		-0.2529	-0.36174	-0.42856	-0.59848	0.004807
-4.76997	-0.56191	-0.34913	-0.0983	-1.7385	-1.17443		-0.07872	-0.63175	0.959667	-1.79156	1.03289		-0.77521	-0.15845	-1.17864	0.208205	0.187293		-0.25678	-0.43322	-0.40043	-0.82518	0.00332
-4.76176	-0.58447	-0.32943	-0.06955	-1.75664	-1.1824		-0.09766	-0.57378	0.977885	-1.76362	0.905794		-0.75816	-0.20176	-1.17076	0.184235	0.324205		-0.23247	-0.48117	-0.3708	-1.02829	0.040637
-4.75356	-0.6088	-0.29507	-0.03428	-1.76318	-1.2098		-0.1454	-0.44859	0.960188	-1.74062	0.775303		-0.73372	-0.19605	-1.15569	0.171608	0.514229		-0.21774	-0.50073	-0.3535	-1.14632	0.110126
-4.74536	-0.6197	-0.27723	-0.00674	-1.69995	-1.25142		-0.20654	-0.2788	0.902767	-1.68064	0.668162		-0.71504	-0.13708	-1.10984	0.179444	0.724244		-0.25459	-0.50018	-0.35711	-1.17209	0.187984
-4.73715	-0.61878	-0.30483	0.001324	-1.53442	-1.28544		-0.2439	-0.12032	0.820411	-1.59095	0.583748		-0.70618	-0.03417	-1.01911	0.203211	0.92269		-0.33899	-0.49018	-0.3795	-1.16091	0.254324
-4.72895	-0.61314	-0.37252	-0.00928	-1.31413	-1.28235		-0.23078	-0.00927	0.733123	-1.52914	0.51087		-0.70863	0.115314	-0.89552	0.234826	1.09295		-0.43625	-0.48521	-0.41418	-1.16756	0.290626
-4.72075	-0.60868	-0.44486	-0.03532	-1.13468	-1.23664		-0.17122	0.042591	0.6524	-1.5553	0.433161		-0.71538	0.310064	-0.76193	0.260389	1.2175		-0.50519	-0.48601	-0.44084	-1.17503	0.298318
-4.71263	-0.59355	-0.47131	-0.06108	-1.0631	-1.16641		-0.08323	0.04521	0.580585	-1.65727	0.3433		-0.7092	0.531581	-0.64451	0.272136	1.2773		-0.53492	-0.47688	-0.44083	-1.13175	0.296935
-4.70442	-0.53039	-0.43652	-0.07305	-1.05722	-1.09648		0.021465	0.017553	0.51586	-1.75127	0.248974		-0.68744	0.73388	-0.55337	0.258189	1.25597		-0.53942	-0.43688	-0.42341	-1.02557	0.327942
-4.69622	-0.39759	-0.36967	-0.07301	-1.02496	-1.03975		0.141986	-0.02883	0.455168	-1.77986	0.173107		-0.66638	0.883111	-0.48371	0.224862	1.15082		-0.54103	-0.37028	-0.41566	-0.92529	0.444813
-4.68802	-0.22158	-0.32242	-0.06484	-0.92538	-0.98999		0.26554	-0.0809	0.403775	-1.73724	0.140309		-0.68031	0.957796	-0.43422	0.193212	0.998908		-0.55325	-0.29532	-0.43134	-0.90577	0.66621
-4.67981	-0.06291	-0.32861	-0.05462	-0.80356	-0.95552		0.374247	-0.12475	0.379179	-1.65242	0.151242		-0.74493	0.960939	-0.39823	0.191405	0.85447		-0.56839	-0.22495	-0.45648	-0.96947	0.959323
-4.67161	0.037975	-0.37219	-0.05136	-0.74043	-0.94368		0.452447	-0.15214	0.390071	-1.54259	0.197007		-0.84368	0.925202	-0.37517	0.243624	0.756221		-0.57539	-0.16577	-0.47188	-1.05716	1.24881
-4.66341	0.077244	-0.411	-0.07614	-0.74509	-0.9441		0.485928	-0.16268	0.421664	-1.39841	0.274338		-0.93689	0.881769	-0.36323	0.333166	0.70159		-0.57993	-0.11076	-0.46661	-1.0973	1.46892
-4.6552	0.07134	-0.40949	-0.13586	-0.76107	-0.93966		0.482395	-0.15842	0.450851	-1.22712	0.393061		-0.98816	0.861661	-0.35664	0.400533	0.665234		-0.60655	-0.06154	-0.4454	-1.06238	1.59637
-4.647	0.045327	-0.37874	-0.21476	-0.71407	-0.91956		0.464553	-0.146	0.450013	-1.05169	0.548419		-0.98586	0.879187	-0.34482	0.381533	0.633608		-0.66251	-0.02958	-0.42231	-0.96373	1.65194
-4.6388	0.023458	-0.3584	-0.28794	-0.60231	-0.90068		0.456922	-0.15382	0.409895	-0.88519	0.704698		-0.93938	0.910607	-0.31738	0.289495	0.602241		-0.71013	-0.01469	-0.40823	-0.8531	1.66735
-4.6306	0.044191	-0.36856	-0.33647	-0.51099	-0.90985		0.461871	-0.20245	0.341214	-0.70032	0.806227		-0.8806	0.916114	-0.27579	0.198657	0.579879		-0.70842	-0.01665	-0.41757	-0.80349	1.65509
-4.62247	0.127469	-0.4016	-0.3696	-0.5068	-0.96119		0.460851	-0.27436	0.260025	-0.47789	0.822752		-0.84112	0.869728	-0.23041	0.169456	0.557914		-0.65416	-0.03329	-0.44911	-0.87514	1.61818
-4.61427	0.250205	-0.43005	-0.39884	-0.60808	-1.03773		0.445003	-0.3249	0.182129	-0.26285	0.784023		-0.8369	0.792045	-0.19869	0.227359	0.515468		-0.6015	-0.06152	-0.48415	-1.0614	1.55714
-4.60607	0.346078	-0.44178	-0.42563	-0.77093	-1.09525		0.424271	-0.32884	0.114325	-0.14475	0.731148		-0.85698	0.722232	-0.19114	0.344663	0.450567		-0.60716	-0.08963	-0.50328	-1.26281	1.48642
-4.59786	0.36416	-0.4453	-0.44156	-0.93873	-1.10466		0.414847	-0.30397	0.062071	-0.18838	0.669044		-0.87721	0.696165	-0.20221	0.470766	0.379233		-0.67446	-0.10438	-0.50328	-1.37672	1.42354
-4.58966	0.311499	-0.44424	-0.44663	-1.08505	-1.06602		0.40958	-0.28946	0.025366	-0.36062	0.571881		-0.89231	0.718819	-0.21936	0.545516	0.322681		-0.76202	-0.09736	-0.50492	-1.35544	1.37837
-4.58146	0.224518	-0.44166	-0.44785	-1.20832	-1.00604		0.379534	-0.3167	0.00122	-0.56028	0.436408		-0.90842	0.753703	-0.23509	0.535327	0.285993		-0.81309	-0.06584	-0.52112	-1.24485	1.3477
-4.57325	0.137433	-0.44418	-0.45466	-1.30884	-0.94543		0.309459	-0.37413	-0.01488	-0.68098	0.308647		-0.93249	0.76298	-0.24587	0.451373	0.264956		-0.80625	-0.0334	-0.54934	-1.15227	1.32383
-4.56505	0.050653	-0.46023	-0.48401	-1.36466	-0.8832		0.213885	-0.43074	-0.03545	-0.70198	0.232436		-0.95821	0.734915	-0.2383	0.33332	0.254308		-0.75884	-0.03337	-0.57415	-1.13927	1.32084
-4.55685	-0.04388	-0.47989	-0.53877	-1.38399	-0.81559		0.132782	-0.46029	-0.06532	-0.67203	0.212511		-0.96513	0.682782	-0.21125	0.235527	0.253824		-0.70913	-0.08233	-0.57979	-1.18322	1.34925
-4.54865	-0.13533	-0.48131	-0.60594	-1.42757	-0.75695		0.099872	-0.44663	-0.1008	-0.62039	0.204925		-0.95284	0.62512	-0.18148	0.182238	0.264479		-0.69129	-0.15299	-0.57278	-1.20101	1.39398
-4.54044	-0.19844	-0.45328	-0.66702	-1.5694	-0.74178		0.116844	-0.40632	-0.1338	-0.53298	0.172557		-0.9387	0.570484	-0.17252	0.182904	0.273317		-0.7005	-0.19693	-0.57158	-1.14736	1.41009
-4.53232	-0.21289	-0.40325	-0.7133	-1.80597	-0.78152		0.147773	-0.37272	-0.16359	-0.3666	0.12112		-0.94336	0.503231	-0.20243	0.253303	0.26536		-0.70958	-0.19339	-0.59248	-1.04811	1.35101
-4.52412	-0.18982	-0.36394	-0.75953	-2.03716	-0.84818		0.13755	-0.38157	-0.20014	-0.13746	0.071081		-0.96474	0.39663	-0.26207	0.382437	0.235377		-0.68825	-0.16001	-0.63131	-0.95452	1.22623
-4.51591	-0.15631	-0.36179	-0.81856	-2.13167	-0.89655		0.06274	-0.43715	-0.24697	0.073316	0.039575		-0.99013	0.255713	-0.33329	0.533448	0.202665		-0.64179	-0.13175	-0.65925	-0.91361	1.08875
-4.50771	-0.13906	-0.40241	-0.89221	-2.03584	-0.9123		-0.05055	-0.50531	-0.29264	0.195733	0.023911		-1.01458	0.132986	-0.39306	0.653392	0.198875		-0.60435	-0.11273	-0.64943	-0.94884	1.00395
-4.49951	-0.15182	-0.45816	-0.9693	-1.82047	-0.91658		-0.14314	-0.54988	-0.31577	0.221022	0.010785		-1.04803	0.087351	-0.43149	0.707181	0.233714		-0.60713	-0.08491	-0.5912	-1.0684	1.00179
-4.49131	-0.17984	-0.48395	-1.04188	-1.60439	-0.92708		-0.17998	-0.54881	-0.31773	0.21717	-0.01337		-1.10453	0.132979	-0.45086	0.692259	0.281587		-0.65297	-0.03775	-0.49906	-1.24019	1.06578
-4.4831	-0.19892	-0.4387	-1.11182	-1.47651	-0.95474		-0.16116	-0.5137	-0.3184	0.229452	-0.06024		-1.17182	0.224403	-0.4565	0.630421	0.301663		-0.70608	0.009519	-0.39432	-1.38636	1.15861
-4.4749	-0.1892	-0.32631	-1.1691	-1.4654	-0.99381		-0.11405	-0.46478	-0.33526	0.255003	-0.12238		-1.22026	0.293771	-0.46165	0.550094	0.291221		-0.72787	0.024167	-0.29657	-1.4332	1.23862
-4.4667	-0.15178	-0.21445	-1.19774	-1.54503	-1.03167		-0.07534	-0.41324	-0.35911	0.270471	-0.1728		-1.2331	0.286477	-0.47902	0.472252	0.27066		-0.70567	4.6e-05	-0.21823	-1.35559	1.28267
-4.45849	-0.10299	-0.16396	-1.19159	-1.6825	-1.0448		-0.06368	-0.36128	-0.35709	0.260258	-0.18658		-1.21622	0.206111	-0.5128	0.415847	0.253559		-0.65857	-0.05174	-0.16339	-1.1858	1.28508
-4.45029	-0.05759	-0.19592	-1.16874	-1.83017	-1.00798		-0.07992	-0.30775	-0.32128	0.236134	-0.17226		-1.18242	0.088671	-0.54971	0.380118	0.225571		-0.61814	-0.10331	-0.12917	-0.97857	1.24691
-4.44217	-0.02162	-0.28181	-1.15852	-1.96579	-0.92762		-0.10604	-0.26349	-0.27452	0.206124	-0.1568		-1.14309	-0.02619	-0.57414	0.369715	0.161055		-0.61366	-0.11751	-0.10407	-0.78776	1.16914
-4.43397	0.024147	-0.36995	-1.17334	-2.08542	-0.83407		-0.1272	-0.24514	-0.25599	0.176816	-0.15495		-1.11604	-0.11053	-0.59175	0.368728	0.071287		-0.65354	-0.07297	-0.07952	-0.65216	1.06571
-4.42576	0.109192	-0.43489	-1.2098	-2.1567	-0.76189		-0.14122	-0.25985	-0.27699	0.152097	-0.16656		-1.11024	-0.1686	-0.61607	0.332215	-0.00386		-0.71187	0.017447	-0.03911	-0.58981	0.969966
-4.41756	0.259695	-0.47349	-1.2508	-2.16599	-0.71398		-0.14564	-0.2949	-0.31063	0.137853	-0.18285		-1.13035	-0.20722	-0.65115	0.221997	-0.03724		-0.76051	0.099423	0.02449	-0.57028	0.910396
-4.40936	0.470418	-0.48474	-1.28803	-2.1383	-0.67368		-0.14405	-0.33195	-0.32022	0.143501	-0.19997		-1.16658	-0.22348	-0.6864	0.04289	-0.03046		-0.78312	0.139533	0.105574	-0.52323	0.887081
-4.40115	0.704115	-0.43036	-1.32495	-2.12876	-0.64807		-0.13303	-0.36463	-0.28587	0.196731	-0.20859		-1.18898	-0.21054	-0.70821	-0.13099	1.17e-05		-0.7816	0.140338	0.184845	-0.41951	0.868205
-4.39295	0.914786	-0.2515	-1.36773	-2.15985	-0.65663		-0.12067	-0.40091	-0.22501	0.335377	-0.20137		-1.17565	-0.1909	-0.72351	-0.213	0.04306		-0.76989	0.13307	0.230425	-0.28621	0.822147
-4.38475	1.08404	0.083216	-1.4138	-2.18818	-0.70281		-0.12443	-0.45724	-0.1669	0.56039	-0.17285		-1.11905	-0.21177	-0.75577	-0.16724	0.078005		-0.74155	0.145375	0.238838	-0.19316	0.749403
-4.37654	1.22442	0.542003	-1.44922	-2.15345	-0.75715		-0.14681	-0.52757	-0.13398	0.817505	-0.13712		-1.04412	-0.28359	-0.81343	-0.02718	0.087812		-0.68906	0.18901	0.230477	-0.18053	0.681214
-4.36834	1.33759	1.03258	-1.45599	-2.03468	-0.78762		-0.17238	-0.58362	-0.13393	1.00696	-0.12821		-0.99018	-0.37405	-0.8716	0.114918	0.071081		-0.63476	0.271712	0.239398	-0.22659	0.651322
-4.36014	1.42653	1.43583	-1.42363	-1.88442	-0.78269		-0.17954	-0.58796	-0.14936	1.05899	-0.15617		-0.99009	-0.43754	-0.90508	0.192178	0.03876		-0.63487	0.392088	0.280578	-0.28523	0.670187
-4.35193	1.48791	1.68067	-1.37664	-1.77202	-0.75532		-0.1675	-0.52887	-0.16169	0.969682	-0.20782		-1.04276	-0.46567	-0.90412	0.181619	0.000615		-0.72423	0.518498	0.339028	-0.31741	0.749677
-4.34381	1.51361	1.76907	-1.34458	-1.74394	-0.73234		-0.15899	-0.4345	-0.16149	0.780945	-0.25556		-1.11046	-0.48548	-0.88128	0.120173	-0.04033		-0.87483	0.590571	0.393656	-0.34003	0.894196
-4.33561	1.501	1.75382	-1.33351	-1.80579	-0.7367		-0.18489	-0.34696	-0.15164	0.566656	-0.28025		-1.17004	-0.51515	-0.86101	0.073447	-0.07721		-1.01549	0.57618	0.428352	-0.38256	1.0922
-4.32741	1.45097	1.69922	-1.32341	-1.90599	-0.78347		-0.25077	-0.30094	-0.14619	0.369358	-0.28391		-1.21809	-0.53932	-0.859	0.078952	-0.09583		-1.0787	0.500225	0.448711	-0.44914	1.31163
-4.3192	1.38173	1.65563	-1.28199	-1.95241	-0.86265		-0.32729	-0.29507	-0.16012	0.216219	-0.27275		-1.26092	-0.5401	-0.88336	0.113527	-0.09082		-1.0551	0.411318	0.462806	-0.51918	1.50626
-4.311	1.30865	1.64004	-1.20897	-1.88236	-0.9409		-0.37485	-0.30596	-0.19666	0.11411	-0.25725		-1.29506	-0.53215	-0.92295	0.090889	-0.08575		-0.99092	0.341541	0.477876	-0.54343	1.64862
-4.3028	1.22861	1.64737	-1.12589	-1.72517	-0.98261		-0.36648	-0.31297	-0.24156	0.04937	-0.23728		-1.29223	-0.53408	-0.95023	-0.03946	-0.11209		-0.93983	0.291246	0.500244	-0.50001	1.73923
-4.29459	1.12864	1.65381	-1.04876	-1.56366	-0.98019		-0.3099	-0.29746	-0.28391	0.016424	-0.21649		-1.22584	-0.54442	-0.94011	-0.24528	-0.17536		-0.92512	0.253869	0.524287	-0.4221	1.80154
-4.28639	1.01018	1.63281	-0.97184	-1.47387	-0.95975		-0.24278	-0.25476	-0.31994	0.012583	-0.20989		-1.09747	-0.5441	-0.89535	-0.43128	-0.2485		-0.93306	0.218472	0.536101	-0.38147	1.86075
-4.27819	0.906349	1.56652	-0.88666	-1.46883	-0.94194		-0.21958	-0.18818	-0.36009	0.045149	-0.23465		-0.94823	-0.5152	-0.85445	-0.52638	-0.29255		-0.94466	0.176118	0.526349	-0.41109	1.92432
-4.26998	0.826428	1.45366	-0.81176	-1.49946	-0.93292		-0.26226	-0.10971	-0.41001	0.098891	-0.30311		-0.82945	-0.44809	-0.84699	-0.52858	-0.30856		-0.94865	0.119663	0.506659	-0.4751	1.99342
-4.26178	0.743221	1.30534	-0.76431	-1.52338	-0.92649		-0.34081	-0.03185	-0.45769	0.145748	-0.38988		-0.7713	-0.30989	-0.87246	-0.4634	-0.32452		-0.94444	0.045272	0.487357	-0.51566	2.05702
-4.25366	0.623752	1.12854	-0.74604	-1.5152	-0.91057		-0.41089	0.045851	-0.4858	0.168386	-0.44917		-0.76418	-0.07742	-0.90675	-0.36473	-0.36679		-0.93304	-0.02694	0.464238	-0.51137	2.1026
-4.24546	0.492917	0.950663	-0.73755	-1.47075	-0.88256		-0.43458	0.120741	-0.48677	0.148043	-0.45456		-0.77721	0.22848	-0.93429	-0.26112	-0.43801		-0.91461	-0.07003	0.417359	-0.49645	2.1204
-4.23725	0.421589	0.817412	-0.72043	-1.39492	-0.83917		-0.42165	0.197577	-0.47759	0.103171	-0.42215		-0.80546	0.53894	-0.96785	-0.18954	-0.50071		-0.90056	-0.06816	0.329646	-0.49466	2.10849
-4.22905	0.445692	0.756373	-0.6959	-1.2986	-0.78868		-0.40956	0.272561	-0.47488	0.058311	-0.38652		-0.86697	0.761434	-1.02332	-0.15233	-0.50916		-0.89867	-0.02289	0.218906	-0.49384	2.07157
-4.22085	0.530796	0.745345	-0.67197	-1.20724	-0.73572		-0.42236	0.333695	-0.48043	0.02609	-0.37254		-0.96741	0.86468	-1.09657	-0.1081	-0.43459		-0.91668	0.039205	0.114177	-0.47526	2.01662
-4.21264	0.609535	0.710431	-0.65136	-1.13794	-0.68016		-0.45112	0.365553	-0.49259	-0.01378	-0.39253		-1.06338	0.874439	-1.15892	-0.00919	-0.30487		-0.94314	0.082689	0.040911	-0.44788	1.95614
-4.20444	0.649037	0.604734	-0.62738	-1.11928	-0.61798		-0.46007	0.363394	-0.50959	-0.08381	-0.44074		-1.10575	0.845134	-1.18819	0.153976	-0.19063		-0.95624	0.082068	0.007474	-0.44297	1.89577
-4.19624	0.655422	0.457093	-0.5982	-1.1544	-0.54223		-0.42105	0.33379	-0.53372	-0.17771	-0.504		-1.10055	0.818163	-1.18927	0.312002	-0.14783		-0.94	0.044942	0.012087	-0.46485	1.82803
-4.18804	0.643789	0.340135	-0.57193	-1.20944	-0.46062		-0.32255	0.285529	-0.56014	-0.25467	-0.56206		-1.08921	0.810235	-1.1829	0.407584	-0.19248		-0.89898	1.96e-05	0.052719	-0.49776	1.73434
-4.17983	0.616757	0.29822	-0.56785	-1.25368	-0.38732		-0.18295	0.229778	-0.58108	-0.26614	-0.61134		-1.10206	0.822028	-1.18517	0.433575	-0.29113		-0.86763	-0.03709	0.122711	-0.513	1.61626
-4.17163	0.565427	0.306695	-0.598	-1.28892	-0.33353		-0.0405	0.165311	-0.58715	-0.23233	-0.66645		-1.12199	0.839788	-1.19984	0.404421	-0.39467		-0.86337	-0.07664	0.216989	-0.48754	1.5099
-4.16351	0.496132	0.309845	-0.65153	-1.35852	-0.30108		0.07914	0.10215	-0.57125	-0.21118	-0.73332		-1.13148	0.843435	-1.22679	0.344616	-0.46923		-0.87611	-0.14433	0.316845	-0.42281	1.44788
-4.15531	0.415074	0.267215	-0.70506	-1.48053	-0.28391		0.150663	0.061656	-0.54639	-0.23674	-0.78896		-1.14174	0.800914	-1.25664	0.275429	-0.5123		-0.87606	-0.2426	0.387721	-0.33467	1.42767
-4.1471	0.327171	0.179519	-0.74145	-1.60401	-0.28168		0.16616	0.052919	-0.52959	-0.29266	-0.79079		-1.16988	0.688427	-1.28569	0.233673	-0.53942		-0.84201	-0.3419	0.402242	-0.27034	1.41307
-4.1389	0.251108	0.073552	-0.7653	-1.64348	-0.29827		0.139115	0.066725	-0.53814	-0.34102	-0.73342		-1.21139	0.517067	-1.31183	0.246062	-0.55588		-0.78787	-0.40303	0.349052	-0.23405	1.37718
-4.1307	0.206656	-0.03084	-0.78997	-1.55256	-0.33209		0.105081	0.071947	-0.56785	-0.35891	-0.65668		-1.23873	0.332404	-1.33534	0.306129	-0.55762		-0.73929	-0.40354	0.255531	-0.15658	1.32803
-4.12249	0.208417	-0.12758	-0.8192	-1.3745	-0.3538		0.099203	0.041293	-0.59458	-0.3298	-0.59783		-1.2501	0.192793	-1.37374	0.377253	-0.53822		-0.72111	-0.34997	0.165531	0.04661	1.28245
-4.11429	0.25331	-0.2171	-0.85028	-1.20349	-0.32205		0.137381	-0.04071	-0.603	-0.25326	-0.56579		-1.27486	0.127101	-1.4352	0.411614	-0.5142		-0.74174	-0.26487	0.10588	0.396791	1.24637
-4.10609	0.340148	-0.29289	-0.8723	-1.10839	-0.2054		0.200103	-0.15963	-0.60802	-0.15025	-0.53808		-1.32918	0.120004	-1.50936	0.412684	-0.51588		-0.79685	-0.17765	0.076779	0.80444	1.20147
-4.09788	0.465294	-0.34759	-0.87515	-1.09332	-0.00589		0.246412	-0.27688	-0.63667	-0.07399	-0.50278		-1.39239	0.124643	-1.56847	0.421197	-0.55461		-0.87381	-0.12042	0.063955	1.1691	1.13333
-4.08968	0.616192	-0.37645	-0.83425	-1.13989	0.225266		0.267027	-0.36536	-0.68443	-0.1051	-0.47091		-1.42466	0.109793	-1.5845	0.465011	-0.60132		-0.94913	-0.10995	0.064682	1.41843	1.0477
-4.08148	0.758088	-0.38791	-0.7302	-1.23021	0.422964		0.284291	-0.41288	-0.72224	-0.24848	-0.46461		-1.41595	0.074354	-1.55121	0.524792	-0.61268		-0.99219	-0.13429	0.085475	1.54228	0.961207
-4.07336	0.851863	-0.39258	-0.57746	-1.3442	0.529687		0.327119	-0.44435	-0.72067	-0.42191	-0.49078		-1.37536	0.037128	-1.48399	0.555432	-0.58967		-0.97886	-0.16678	0.130754	1.56465	0.890126
-4.06515	0.890027	-0.38737	-0.41857	-1.45808	0.528674		0.397921	-0.48551	-0.6808	-0.52232	-0.5345		-1.30701	0.026932	-1.42055	0.531807	-0.56795		-0.91441	-0.20433	0.179868	1.52642	0.832043
-4.05695	0.896587	-0.37831	-0.27618	-1.53061	0.440065		0.466132	-0.53915	-0.62333	-0.5143	-0.57481		-1.21266	0.043729	-1.3856	0.471277	-0.58789		-0.83187	-0.24738	0.204205	1.49789	0.763498
-4.04875	0.898374	-0.36492	-0.12411	-1.56679	0.308349		0.495879	-0.58672	-0.56335	-0.44422	-0.59415		-1.11206	0.061882	-1.38292	0.423147	-0.65204		-0.77482	-0.29298	0.181566	1.51789	0.651771
-4.04054	0.90255	-0.34409	0.085296	-1.58384	0.190831		0.472555	-0.59884	-0.5135	-0.38111	-0.59763		-1.03908	0.04642	-1.40096	0.407037	-0.72157		-0.76866	-0.31728	0.108392	1.55906	0.497187
-4.03234	0.896029	-0.31782	0.368341	-1.57077	0.129323		0.428603	-0.55887	-0.48258	-0.36786	-0.60708		-1.01557	-0.00396	-1.41684	0.41077	-0.76508		-0.79835	-0.30171	0.002416	1.54939	0.335004
-4.02414	0.860157	-0.30043	0.698616	-1.50513	0.146107		0.402045	-0.47133	-0.47991	-0.39016	-0.64236		-1.04677	-0.0457	-1.42218	0.409593	-0.76857		-0.83028	-0.2631	-0.10981	1.45372	0.198434
-4.01593	0.789134	-0.32765	1.02859	-1.3925	0.227857		0.398376	-0.3654	-0.50532	-0.41991	-0.7042		-1.11393	-0.04565	-1.42403	0.394362	-0.73602		-0.83633	-0.23787	-0.19243	1.29374	0.093074
-4.00773	0.701192	-0.41472	1.31865	-1.31369	0.339484		0.402409	-0.26608	-0.5472	-0.44697	-0.7661		-1.1904	-0.01207	-1.43669	0.385802	-0.6707		-0.81929	-0.25581	-0.22619	1.10967	0.002282
-3.99953	0.612535	-0.54134	1.54002	-1.35915	0.436004		0.40048	-0.18558	-0.59636	-0.46698	-0.80257		-1.24711	0.00519	-1.46289	0.385921	-0.57628		-0.7962	-0.30974	-0.21238	0.948867	-0.08162
-3.99132	0.527678	-0.64504	1.67747	-1.54235	0.486082		0.417452	-0.12239	-0.62955	-0.45799	-0.80364		-1.26106	-0.03134	-1.48758	0.391842	-0.47081		-0.79193	-0.37476	-0.16808	0.810607	-0.1499
-3.9832	0.445776	-0.68896	1.7408	-1.75114	0.489481		0.486513	-0.06273	-0.62551	-0.39347	-0.78526		-1.24705	-0.11323	-1.48441	0.395955	-0.37121		-0.82128	-0.42292	-0.12348	0.702114	-0.19083
-3.975	0.367011	-0.704	1.76949	-1.83906	0.465734		0.610879	-0.00967	-0.57912	-0.29075	-0.76127		-1.24543	-0.21067	-1.43467	0.406454	-0.29181		-0.8641	-0.43241	-0.08924	0.649803	-0.20964
-3.9668	0.313668	-0.73892	1.80185	-1.76355	0.441284		0.757802	0.02675	-0.51386	-0.19721	-0.73423		-1.29097	-0.29892	-1.33793	0.435988	-0.23574		-0.89455	-0.40515	-0.06674	0.670992	-0.21759
-3.95859	0.303354	-0.80913	1.8407	-1.60303	0.435474		0.895457	0.037603	-0.46388	-0.15556	-0.71408		-1.3765	-0.36594	-1.2014	0.46085	-0.20411		-0.9061	-0.35795	-0.05091	0.743137	-0.20956
-3.95039	0.330698	-0.88183	1.871	-1.48159	0.450594		1.0277	0.028734	-0.43728	-0.16242	-0.70666		-1.46745	-0.40518	-1.04679	0.447093	-0.20179		-0.917	-0.31679	-0.03785	0.7892	-0.19256
-3.94219	0.365037	-0.91571	1.87921	-1.46949	0.476587		1.16799	0.011988	-0.42408	-0.16973	-0.71881		-1.54017	-0.42987	-0.90864	0.369394	-0.22774		-0.9505	-0.30624	-0.03527	0.74208	-0.18217
-3.93398	0.384126	-0.89841	1.86646	-1.5533	0.50327		1.3109	-0.00962	-0.42181	-0.16827	-0.74349		-1.58216	-0.47209	-0.81663	0.251793	-0.2773		-0.99196	-0.33976	-0.05122	0.570883	-0.18126
-3.92578	0.39657	-0.84469	1.84138	-1.6759	0.538752		1.4317	-0.02505	-0.44223	-0.18809	-0.76236		-1.60101	-0.55462	-0.78034	0.143085	-0.33827		-1.01331	-0.40291	-0.09149	0.326966	-0.17104
-3.91758	0.409748	-0.77616	1.80479	-1.7906	0.599014		1.52283	-0.03323	-0.48298	-0.26804	-0.76755		-1.60373	-0.65855	-0.77668	0.062615	-0.39535		-1.00079	-0.46189	-0.1405	0.097095	-0.13242
-3.90937	0.425512	-0.71577	1.75787	-1.87585	0.683057		1.60658	-0.04636	-0.51993	-0.37672	-0.76192		-1.59724	-0.73022	-0.77932	0.024972	-0.43076		-0.97011	-0.4996	-0.17839	-0.05384	-0.08199
-3.90117	0.435228	-0.69769	1.69362	-1.90492	0.761634		1.70365	-0.08939	-0.52938	-0.43	-0.76366		-1.59761	-0.74036	-0.77513	0.03106	-0.44141		-0.93783	-0.51699	-0.20075	-0.10439	-0.05152
-3.89305	0.433039	-0.73391	1.61312	-1.86954	0.800906		1.80771	-0.17561	-0.5146	-0.37566	-0.77624		-1.61746	-0.70217	-0.76968	0.063638	-0.43151		-0.90495	-0.53358	-0.21648	-0.08989	-0.06375
-3.88485	0.429084	-0.7987	1.5129	-1.78326	0.794512		1.88203	-0.2799	-0.50717	-0.21991	-0.78649		-1.66047	-0.64918	-0.76521	0.093315	-0.40296		-0.87751	-0.55747	-0.22932	-0.06555	-0.10939
-3.87664	0.430357	-0.85431	1.39426	-1.68345	0.75589		1.90434	-0.36039	-0.52396	-0.01946	-0.78157		-1.71528	-0.59397	-0.75669	0.107071	-0.35891		-0.86491	-0.58624	-0.23255	-0.06478	-0.16619
-3.86844	0.428668	-0.88478	1.27309	-1.60029	0.706321		1.87098	-0.39256	-0.55949	0.198313	-0.75907		-1.76501	-0.53254	-0.75567	0.114252	-0.30308		-0.88428	-0.61688	-0.22623	-0.08006	-0.22698
-3.86024	0.410885	-0.89665	1.16302	-1.53358	0.644077		1.79235	-0.39286	-0.59809	0.422577	-0.73131		-1.78152	-0.47517	-0.77269	0.129364	-0.25143		-0.93303	-0.64388	-0.22448	-0.07532	-0.2955
-3.85204	0.38384	-0.886	1.0735	-1.4672	0.556794		1.69694	-0.39168	-0.62951	0.634808	-0.70886		-1.75003	-0.4388	-0.80005	0.15243	-0.2152		-0.98405	-0.66114	-0.24419	-0.02434	-0.36851
-3.84383	0.3667	-0.85321	1.00111	-1.37957	0.446731		1.61563	-0.39249	-0.65049	0.807138	-0.70723		-1.68502	-0.44985	-0.8009	0.172999	-0.19855		-0.98898	-0.65659	-0.28609	0.068327	-0.42582
-3.83563	0.372058	-0.81689	0.938211	-1.29214	0.329061		1.5727	-0.38494	-0.65378	0.916582	-0.74583		-1.61392	-0.51602	-0.74805	0.207872	-0.20872		-0.91437	-0.63888	-0.33547	0.167598	-0.4465
-3.82743	0.401695	-0.81423	0.874248	-1.24032	0.233145		1.5614	-0.37497	-0.63964	0.973082	-0.83462		-1.56847	-0.60565	-0.66632	0.275715	-0.24409		-0.77486	-0.63457	-0.37548	0.244727	-0.43296
-3.81922	0.445101	-0.86762	0.796894	-1.23439	0.188777		1.55829	-0.3916	-0.61052	0.973059	-0.95175		-1.55952	-0.67775	-0.60827	0.360429	-0.29338		-0.62242	-0.66568	-0.39686	0.286461	-0.41418
-3.81102	0.49584	-0.95525	0.702769	-1.27465	0.206999		1.54307	-0.45004	-0.5705	0.88605	-1.04987		-1.57369	-0.70711	-0.60665	0.412875	-0.3234		-0.52126	-0.73872	-0.40996	0.289791	-0.41735
-3.80282	0.552983	-1.04367	0.605838	-1.34082	0.272748		1.51213	-0.54372	-0.52825	0.697253	-1.09236		-1.5747	-0.71359	-0.65071	0.391651	-0.31209		-0.4921	-0.83454	-0.42228	0.260747	-0.43516
-3.79469	0.618809	-1.10766	0.526419	-1.42488	0.349138		1.48162	-0.65188	-0.48557	0.457639	-1.09142		-1.54439	-0.73366	-0.71151	0.321906	-0.27516		-0.51494	-0.92707	-0.43357	0.182631	-0.43818
-3.78649	0.680642	-1.13855	0.475047	-1.51394	0.403298		1.4534	-0.74288	-0.44569	0.258641	-1.09313		-1.50411	-0.78675	-0.76699	0.233803	-0.23979		-0.5618	-0.99197	-0.43964	0.046127	-0.39771
-3.77829	0.714682	-1.13682	0.438139	-1.56332	0.407028		1.42066	-0.78529	-0.40347	0.140992	-1.11337		-1.4878	-0.85753	-0.80714	0.129293	-0.21901		-0.61717	-1.01287	-0.43049	-0.12939	-0.30062
-3.77009	0.709681	-1.11066	0.396126	-1.54051	0.343758		1.38225	-0.75888	-0.35561	0.091674	-1.12921		-1.5096	-0.90655	-0.82932	0.004712	-0.19227		-0.68494	-0.99643	-0.41019	-0.30059	-0.14964
-3.76188	0.67379	-1.09043	0.346266	-1.46416	0.213532		1.33412	-0.69047	-0.30637	0.061438	-1.1228		-1.52759	-0.92497	-0.83289	-0.1142	-0.13701		-0.75346	-0.96377	-0.39379	-0.4405	0.046993
-3.75368	0.635592	-1.10835	0.304932	-1.38476	0.042153		1.275	-0.63545	-0.26329	0.030596	-1.0968		-1.48761	-0.91691	-0.83464	-0.17388	-0.0516		-0.79935	-0.94502	-0.39485	-0.54718	0.256814
-3.74548	0.611132	-1.17434	0.28393	-1.29844	-0.12346		1.21774	-0.62918	-0.2286	-0.00075	-1.07314		-1.38449	-0.87821	-0.84631	-0.17104	0.05728		-0.80158	-0.95414	-0.41415	-0.61371	0.428426
-3.73727	0.595642	-1.26111	0.287196	-1.15393	-0.25462		1.18141	-0.65615	-0.18132	-0.05226	-1.05353		-1.26071	-0.80719	-0.86247	-0.14899	0.187015		-0.75859	-0.97171	-0.44127	-0.66387	0.504447
-3.72907	0.575131	-1.32651	0.296647	-0.91735	-0.34045		1.1604	-0.67072	-0.09778	-0.14762	-1.0292		-1.1705	-0.72935	-0.86938	-0.15877	0.329605		-0.69917	-0.96684	-0.46999	-0.7295	0.472117
-3.72087	0.539116	-1.3464	0.280435	-0.60931	-0.39585		1.13346	-0.66377	0.019449	-0.29107	-1.00124		-1.13256	-0.68697	-0.8628	-0.20319	0.4572		-0.65686	-0.93278	-0.494	-0.82894	0.375166
-3.71266	0.494625	-1.32385	0.221825	-0.29914	-0.43535		1.08344	-0.65542	0.141594	-0.42094	-0.9816		-1.14207	-0.70463	-0.85383	-0.24382	0.54502		-0.65455	-0.9026	-0.51592	-0.94252	0.263888
-3.70454	0.445861	-1.27992	0.125655	-0.04726	-0.47741		1.01951	-0.66893	0.242968	-0.4701	-0.98223		-1.1868	-0.77118	-0.84611	-0.28172	0.588479		-0.68043	-0.90501	-0.54594	-1.00808	0.165369
-3.69634	0.391303	-1.2215	0.017005	0.119686	-0.53555		0.974365	-0.69958	0.323851	-0.45021	-0.99925		-1.25719	-0.84208	-0.85016	-0.34618	0.605594		-0.70538	-0.93735	-0.58915	-1.00616	0.07218
-3.68814	0.331295	-1.14102	-0.08538	0.190085	-0.6091		0.962908	-0.72266	0.398958	-0.44107	-1.03138		-1.34844	-0.89048	-0.87541	-0.43005	0.609556		-0.71015	-0.96621	-0.6435	-0.98504	-0.03033
-3.67993	0.264884	-1.02999	-0.1833	0.151003	-0.68598		0.966493	-0.73206	0.469513	-0.51118	-1.07767		-1.43172	-0.90813	-0.91559	-0.47926	0.607264		-0.70112	-0.96903	-0.69898	-1.01424	-0.14567
-3.67173	0.195751	-0.91089	-0.28529	0.021215	-0.7485		0.949145	-0.72992	0.51997	-0.62874	-1.12155		-1.47737	-0.89714	-0.95181	-0.46354	0.622159		-0.69748	-0.95186	-0.74536	-1.09447	-0.26513
-3.66353	0.13399	-0.82936	-0.38759	-0.14153	-0.80226		0.901686	-0.72108	0.547984	-0.69765	-1.14022		-1.47294	-0.86499	-0.94652	-0.42428	0.687636		-0.70101	-0.93546	-0.77325	-1.16818	-0.37393
-3.65532	0.098937	-0.80279	-0.46125	-0.27287	-0.85566		0.845452	-0.70694	0.573007	-0.65898	-1.1283		-1.43705	-0.81963	-0.87384	-0.44223	0.835758		-0.69742	-0.94247	-0.78574	-1.19208	-0.46683
-3.64712	0.096514	-0.81131	-0.48758	-0.31271	-0.90701		0.805326	-0.70184	0.61506	-0.55634	-1.10952		-1.40341	-0.78425	-0.73189	-0.56019	1.05482		-0.6774	-0.96181	-0.79295	-1.16195	-0.53358
-3.63892	0.110498	-0.80698	-0.4715	-0.27226	-0.93917		0.797701	-0.72451	0.678508	-0.48958	-1.1062		-1.39459	-0.76824	-0.54253	-0.72293	1.29981		-0.66154	-0.97628	-0.80245	-1.11245	-0.56599
-3.63071	0.120604	-0.76268	-0.42952	-0.21111	-0.93742		0.801709	-0.77002	0.740542	-0.49082	-1.11691		-1.41123	-0.76702	-0.32599	-0.84791	1.53481		-0.68014	-0.98399	-0.81476	-1.07757	-0.57228
-3.62251	0.117025	-0.69171	-0.3854	-0.19658	-0.91914		0.788783	-0.81198	0.785772	-0.51078	-1.12013		-1.44018	-0.77392	-0.08147	-0.8952	1.74186		-0.73599	-0.99766	-0.82134	-1.08574	-0.5738
-3.61439	0.109608	-0.61859	-0.35408	-0.2656	-0.90835		0.74415	-0.82448	0.812515	-0.48217	-1.09946		-1.48245	-0.78155	0.19524	-0.87685	1.92178		-0.80443	-1.03306	-0.82364	-1.12755	-0.59076
-3.60619	0.100457	-0.56508	-0.34331	-0.41285	-0.9112		0.684915	-0.80864	0.824038	-0.38716	-1.06551		-1.53843	-0.78955	0.501396	-0.82483	2.08232		-0.84591	-1.07891	-0.8265	-1.14903	-0.62385
-3.59798	0.086856	-0.53417	-0.34554	-0.61527	-0.9137		0.647245	-0.79608	0.8204	-0.25949	-1.03243		-1.60627	-0.78772	0.812526	-0.75654	2.2283		-0.84827	-1.11302	-0.8338	-1.07685	-0.66181
-3.58978	0.060967	-0.53413	-0.35559	-0.81911	-0.90423		0.641055	-0.81254	0.7941	-0.12573	-1.00849		-1.67657	-0.76791	1.09278	-0.69758	2.35553		-0.82765	-1.10947	-0.83136	-0.86966	-0.6867
-3.58158	0.020653	-0.57228	-0.37355	-0.96643	-0.90822		0.646277	-0.84998	0.747243	0.002322	-0.99402		-1.73706	-0.73286	1.32181	-0.66958	2.43525		-0.80542	-1.06842	-0.78686	-0.57961	-0.69134
-3.57337	-0.02606	-0.64051	-0.4041	-1.0269	-0.96249		0.626922	-0.88287	0.689674	0.117415	-0.99354		-1.78109	-0.69621	1.49353	-0.70179	2.45015		-0.79998	-1.01616	-0.69339	-0.28699	-0.6714
-3.56517	-0.06432	-0.72257	-0.45063	-1.01627	-1.07552		0.568473	-0.90204	0.640641	0.19446	-1.00297		-1.79041	-0.66984	1.61501	-0.78679	2.41126		-0.80736	-0.96086	-0.57305	-0.05306	-0.62176
-3.55697	-0.06624	-0.79888	-0.50481	-0.98707	-1.19679		0.492137	-0.90949	0.622297	0.228263	-1.01029		-1.75744	-0.64594	1.68589	-0.87173	2.35632		-0.81567	-0.88289	-0.47374	0.099828	-0.54887
-3.54877	-0.02078	-0.86767	-0.55983	-0.97121	-1.24403		0.426051	-0.91792	0.641381	0.214185	-1.02021		-1.69953	-0.61997	1.71144	-0.93252	2.31425		-0.81076	-0.73809	-0.42352	0.196102	-0.46285
-3.54056	0.060149	-0.93915	-0.61421	-0.96482	-1.17519		0.387873	-0.92871	0.685477	0.163654	-1.04149		-1.64671	-0.5984	1.70996	-0.96926	2.27952		-0.79433	-0.50137	-0.40877	0.25373	-0.38534
-3.53236	0.135484	-1.01134	-0.674	-0.94864	-1.0247		0.37802	-0.93139	0.724148	0.120982	-1.0804		-1.61881	-0.59422	1.7153	-0.98229	2.24134		-0.78273	-0.1854	-0.40377	0.277882	-0.32611
-3.52424	0.16151	-1.06962	-0.73071	-0.93208	-0.8699		0.387678	-0.92333	0.732422	0.120043	-1.12632		-1.6003	-0.61197	1.75292	-0.94693	2.20973		-0.78154	0.159878	-0.39087	0.250446	-0.29108
-3.51603	0.13566	-1.09588	-0.76732	-0.95333	-0.75086		0.398317	-0.9083	0.704051	0.163274	-1.15916		-1.57495	-0.64345	1.82319	-0.84476	2.20129		-0.79499	0.486851	-0.37586	0.169883	-0.29196
-3.50783	0.080887	-1.08117	-0.78561	-1.04616	-0.64641		0.386983	-0.9029	0.652186	0.200334	-1.17732		-1.54415	-0.66942	1.91531	-0.71406	2.20683		-0.81552	0.774109	-0.37473	0.081407	-0.33244
-3.49963	0.036611	-1.02938	-0.79436	-1.19931	-0.51356		0.345747	-0.91494	0.601943	0.173511	-1.18199		-1.53291	-0.67701	2.0084	-0.62367	2.19752		-0.83502	1.0111	-0.40221	0.037158	-0.40158
-3.49143	0.037312	-0.96449	-0.8069	-1.33515	-0.34799		0.289877	-0.94173	0.567435	0.076681	-1.17501		-1.5592	-0.68164	2.08359	-0.61513	2.15774		-0.84743	1.18065	-0.45941	0.057256	-0.46848
-3.48322	0.096086	-0.91072	-0.82125	-1.35885	-0.18983		0.249361	-0.97531	0.553069	-0.03794	-1.15722		-1.6061	-0.70175	2.11275	-0.65065	2.10109		-0.844	1.25246	-0.52947	0.086885	-0.50542
-3.47502	0.196907	-0.88783	-0.82812	-1.23454	-0.07957		0.235384	-1.00506	0.553305	-0.1151	-1.13654		-1.64088	-0.74235	2.06939	-0.66502	2.0521		-0.83296	1.22579	-0.59025	0.067753	-0.5015
-3.46682	0.293709	-0.90378	-0.8312	-1.0289	-0.03589		0.243691	-1.0344	0.558893	-0.18241	-1.12826		-1.64492	-0.78911	1.95678	-0.63337	2.01367		-0.84015	1.13827	-0.62283	0.016027	-0.46367
-3.45861	0.359256	-0.94952	-0.84071	-0.8637	-0.03568		0.256759	-1.05405	0.552236	-0.28327	-1.1334		-1.62838	-0.82746	1.80754	-0.56753	1.9821		-0.89103	1.04558	-0.62549	0.002544	-0.40999
-3.45041	0.403844	-1.00391	-0.87007	-0.82159	-0.04183		0.254778	-1.04799	0.524819	-0.41419	-1.14733		-1.60592	-0.87025	1.6598	-0.47801	1.94599		-0.97952	0.983603	-0.61394	0.058508	-0.34984
-3.44221	0.45646	-1.02451	-0.91853	-0.91399	-0.03189		0.227323	-1.00824	0.483863	-0.53928	-1.15956		-1.57792	-0.93031	1.5209	-0.36367	1.89254		-1.07758	0.943665	-0.60911	0.123612	-0.29236
-3.43408	0.522235	-0.99396	-0.98343	-1.06648	-0.00602		0.170914	-0.93583	0.438452	-0.6266	-1.16977		-1.5315	-0.9977	1.37894	-0.25112	1.80918		-1.15025	0.895653	-0.61546	0.115149	-0.24388
-3.42588	0.580534	-0.92927	-1.06371	-1.19918	0.019061		0.103457	-0.84258	0.398389	-0.69008	-1.16721		-1.46874	-1.01904	1.23765	-0.18839	1.68702		-1.17898	0.817315	-0.62401	0.009986	-0.20812
-3.41768	0.622544	-0.86369	-1.14578	-1.27947	0.040569		0.040436	-0.74676	0.358912	-0.74836	-1.12793		-1.41781	-0.95374	1.11247	-0.2274	1.54753		-1.1651	0.707435	-0.63062	-0.14121	-0.18804
-3.40948	0.662755	-0.82659	-1.20888	-1.311	0.062216		-0.0129	-0.66746	0.308082	-0.8082	-1.04456		-1.41121	-0.83182	1.01106	-0.36792	1.41938		-1.11541	0.583759	-0.6379	-0.28736	-0.17834
-3.40127	0.727666	-0.82126	-1.23804	-1.31218	0.091642		-0.05108	-0.60567	0.239889	-0.85714	-0.94468		-1.45198	-0.72525	0.913829	-0.56301	1.31906		-1.04146	0.463238	-0.66147	-0.40866	-0.17092
-3.39307	0.826422	-0.84141	-1.24168	-1.2699	0.133385		-0.07179	-0.54564	0.161911	-0.89476	-0.86596		-1.51254	-0.69221	0.795234	-0.76924	1.23349		-0.9492	0.368462	-0.69992	-0.50323	-0.16075
-3.38487	0.959121	-0.8731	-1.23438	-1.17904	0.179806		-0.07585	-0.46473	0.099383	-0.93041	-0.80879		-1.56163	-0.72367	0.648701	-0.91536	1.13712		-0.8475	0.308277	-0.72161	-0.57335	-0.1584
-3.37666	1.12227	-0.89716	-1.22528	-1.05995	0.225101		-0.08453	-0.3498	0.069204	-0.96508	-0.75368		-1.58839	-0.7694	0.493571	-0.94616	1.03367		-0.75976	0.263929	-0.69247	-0.6072	-0.16808
-3.36846	1.3064	-0.8927	-1.21768	-0.94492	0.251995		-0.12018	-0.19823	0.071615	-1.00098	-0.69053		-1.588	-0.78834	0.35014	-0.85136	0.948306		-0.71452	0.211178	-0.60646	-0.61383	-0.18169
-3.36026	1.48931	-0.84915	-1.21367	-0.86913	0.243011		-0.17572	0.002929	0.087872	-1.0394	-0.63419		-1.5699	-0.77373	0.217162	-0.67177	0.90437		-0.72632	0.143784	-0.49649	-0.61976	-0.18287
-3.35205	1.6371	-0.78974	-1.21749	-0.83445	0.199266		-0.21071	0.276529	0.092386	-1.08864	-0.60916		-1.55235	-0.75073	0.091954	-0.48214	0.884618		-0.75689	0.079375	-0.39933	-0.64496	-0.15893
-3.34393	1.73049	-0.73364	-1.22818	-0.82185	0.150665		-0.19129	0.645118	0.077335	-1.14139	-0.61351		-1.55615	-0.73798	-0.01823	-0.33795	0.839469		-0.75471	0.030095	-0.33558	-0.70644	-0.12184
-3.33573	1.78373	-0.6793	-1.24342	-0.80378	0.122684		-0.13536	1.10688	0.050011	-1.1816	-0.63126		-1.58571	-0.73864	-0.09632	-0.26768	0.737841		-0.70056	-0.01234	-0.30559	-0.79196	-0.09042
-3.32753	1.82128	-0.62091	-1.25438	-0.77164	0.101183		-0.07997	1.59537	0.022605	-1.19479	-0.64908		-1.62211	-0.7383	-0.14266	-0.26121	0.598504		-0.618	-0.06131	-0.28825	-0.88531	-0.07755
-3.31932	1.85617	-0.56878	-1.26484	-0.73696	0.05618		-0.03939	2.02981	-0.00392	-1.16557	-0.66289		-1.64652	-0.72157	-0.17642	-0.28665	0.474997		-0.5537	-0.11117	-0.2648	-0.96473	-0.07548
-3.31112	1.87645	-0.54319	-1.28504	-0.71931	-0.01553		0.005578	2.34563	-0.04036	-1.10851	-0.66536		-1.64896	-0.69705	-0.21629	-0.3078	0.392962		-0.53015	-0.14026	-0.21571	-1.02392	-0.05717
-3.30292	1.86963	-0.54753	-1.31226	-0.74873	-0.0791		0.067995	2.52724	-0.09461	-1.063	-0.63924		-1.63197	-0.69588	-0.27196	-0.29334	0.332884		-0.53952	-0.15028	-0.13047	-1.06826	-0.00466
-3.29471	1.82671	-0.55383	-1.34261	-0.82375	-0.11047		0.12643	2.59052	-0.15812	-1.08159	-0.58769		-1.60223	-0.74031	-0.33119	-0.2467	0.260059		-0.56468	-0.16233	-0.02188	-1.07962	0.089196
-3.28651	1.75462	-0.51131	-1.36429	-0.90791	-0.11772		0.149033	2.56475	-0.20134	-1.18468	-0.52435		-1.56794	-0.80778	-0.38558	-0.18601	0.171994		-0.59045	-0.19455	0.07843	-1.05639	0.20714
-3.27831	1.67035	-0.39998	-1.36765	-0.95762	-0.12774		0.13121	2.47516	-0.19848	-1.31612	-0.47052		-1.5415	-0.85698	-0.44083	-0.1326	0.097678		-0.60142	-0.23467	0.140287	-1.00333	0.321772
-3.2701	1.5831	-0.23618	-1.35595	-0.97252	-0.16092		0.110472	2.33767	-0.14894	-1.39685	-0.44494		-1.52526	-0.86191	-0.50419	-0.10063	0.060844		-0.58257	-0.26431	0.159549	-0.91749	0.417253
-3.2619	1.49813	-0.06887	-1.34304	-0.98223	-0.21278		0.117168	2.18481	-0.0882	-1.37312	-0.45148		-1.51545	-0.82513	-0.57826	-0.09692	0.059141		-0.54068	-0.29196	0.146281	-0.76902	0.497472
-3.2537	1.4205	0.053889	-1.34267	-1.01891	-0.27123		0.152761	2.04083	-0.05131	-1.27721	-0.4949		-1.5123	-0.76212	-0.65085	-0.10914	0.05995		-0.50415	-0.33627	0.113288	-0.55401	0.580561
-3.24558	1.36329	0.117925	-1.34515	-1.09225	-0.32022		0.199408	1.89999	-0.04648	-1.1883	-0.5751		-1.51999	-0.67546	-0.71618	-0.10127	0.040841		-0.49536	-0.40634	0.065831	-0.34879	0.66439
-3.23737	1.33193	0.131885	-1.33591	-1.15314	-0.3516		0.234754	1.75687	-0.06016	-1.17063	-0.68368		-1.5338	-0.57906	-0.77184	-0.05663	-0.00322		-0.51495	-0.48107	0.001347	-0.26601	0.731185
-3.22917	1.31145	0.121915	-1.31116	-1.15848	-0.37949		0.258811	1.61823	-0.07021	-1.24141	-0.79259		-1.53603	-0.49072	-0.81638	0.00778	-0.05942		-0.5368	-0.54502	-0.08225	-0.37005	0.760699
-3.22097	1.27139	0.095286	-1.28949	-1.12243	-0.42044		0.273958	1.51014	-0.07836	-1.37139	-0.87436		-1.52278	-0.43364	-0.8507	0.050654	-0.09384		-0.53762	-0.594	-0.17915	-0.59037	0.761924
-3.21276	1.18765	0.035867	-1.30067	-1.10179	-0.48174		0.286155	1.44532	-0.09344	-1.50867	-0.91525		-1.50049	-0.41154	-0.87973	0.070938	-0.08591		-0.51307	-0.63419	-0.26717	-0.79956	0.762431
-3.20456	1.07396	-0.05877	-1.35184	-1.13583	-0.53697		0.298593	1.40734	-0.11119	-1.60008	-0.9208		-1.47786	-0.39542	-0.90433	0.108938	-0.03901		-0.48853	-0.68248	-0.33116	-0.94138	0.769919
-3.19636	0.966668	-0.16847	-1.42238	-1.19345	-0.55307		0.313915	1.36128	-0.11366	-1.63558	-0.90975		-1.44294	-0.3614	-0.91896	0.202486	0.024031		-0.48543	-0.72614	-0.3558	-1.06055	0.75976
-3.18816	0.897256	-0.25325	-1.48519	-1.22968	-0.52838		0.355009	1.29654	-0.08011	-1.65881	-0.89011		-1.38696	-0.30953	-0.92637	0.364507	0.082133		-0.50923	-0.74174	-0.33748	-1.19928	0.694983
-3.17995	0.861878	-0.29917	-1.53325	-1.21258	-0.49791		0.440515	1.22854	-0.01844	-1.71726	-0.85345		-1.32667	-0.27085	-0.94109	0.563386	0.121591		-0.55139	-0.71634	-0.29581	-1.31627	0.571744
-3.17175	0.842906	-0.30355	-1.57409	-1.1333	-0.5034		0.561459	1.17276	0.045809	-1.80571	-0.78116		-1.2923	-0.26425	-0.98718	0.770065	0.127892		-0.60101	-0.67774	-0.26645	-1.33971	0.424163
-3.16355	0.828422	-0.2509	-1.61508	-0.9959	-0.54591		0.670373	1.14107	0.081899	-1.85442	-0.68151		-1.30603	-0.2729	-1.07083	0.941349	0.107398		-0.65868	-0.66976	-0.29073	-1.25132	0.308365
-3.15542	0.803579	-0.11851	-1.65418	-0.81647	-0.58952		0.722125	1.13041	0.0771	-1.80557	-0.59146		-1.34955	-0.2683	-1.1581	1.01269	0.081338		-0.71794	-0.70377	-0.37032	-1.12668	0.26755
-3.14722	0.76446	0.105599	-1.68419	-0.63816	-0.59487		0.712876	1.13398	0.047693	-1.65229	-0.54755		-1.39033	-0.23635	-1.1945	0.948435	0.072605		-0.76345	-0.73927	-0.46816	-1.05685	0.297647
-3.13902	0.709506	0.392108	-1.70766	-0.51424	-0.55511		0.677583	1.12372	0.01792	-1.45109	-0.57199		-1.39646	-0.19217	-1.1389	0.766178	0.089097		-0.78209	-0.6979	-0.53967	-1.05259	0.358482
-3.13081	0.646335	0.690425	-1.72414	-0.47091	-0.49278		0.663092	1.07429	0.005696	-1.27193	-0.64778		-1.34386	-0.16647	-0.99281	0.552864	0.108372		-0.77222	-0.53122	-0.56631	-1.08682	0.397775
-3.12261	0.581476	0.951917	-1.73214	-0.49272	-0.42842		0.68804	0.981813	0.004787	-1.18037	-0.74204		-1.24435	-0.17334	-0.77874	0.373948	0.114759		-0.75965	-0.25106	-0.58104	-1.14291	0.386923
-3.11441	0.512019	1.15658	-1.72519	-0.53941	-0.37244		0.740487	0.861778	0.004217	-1.21601	-0.82739		-1.14051	-0.20882	-0.53663	0.249106	0.126746		-0.7651	0.088881	-0.6212	-1.2429	0.327755
-3.10621	0.448023	1.31431	-1.69932	-0.57784	-0.32853		0.790238	0.752135	-0.00052	-1.31572	-0.88082		-1.0835	-0.27054	-0.32148	0.161669	0.181661		-0.79417	0.432799	-0.70126	-1.3942	0.234969
-3.098	0.400506	1.44274	-1.67147	-0.58075	-0.30091		0.817978	0.671076	-0.01453	-1.35211	-0.89698		-1.09013	-0.35268	-0.18065	0.088666	0.284297		-0.82654	0.744634	-0.80158	-1.55245	0.126559
-3.0898	0.379501	1.55503	-1.66236	-0.54425	-0.29511		0.82776	0.623938	-0.04964	-1.2445	-0.8875		-1.13694	-0.4273	-0.13674	0.036601	0.398269		-0.84271	0.985175	-0.89082	-1.65163	0.012913
-3.0816	0.377072	1.63471	-1.68613	-0.4908	-0.31559		0.837522	0.614391	-0.1141	-1.04511	-0.88086		-1.19032	-0.47085	-0.16811	0.014723	0.474467		-0.84129	1.13908	-0.95041	-1.64119	-0.08858
-3.07339	0.372402	1.65273	-1.7286	-0.47186	-0.36476		0.865879	0.642916	-0.19657	-0.90244	-0.89528		-1.22608	-0.47683	-0.22978	0.013903	0.491867		-0.83239	1.20631	-0.9874	-1.5491	-0.1685
-3.06527	0.345955	1.5896	-1.76395	-0.51372	-0.42695		0.906921	0.707295	-0.27789	-0.89985	-0.94062		-1.2452	-0.46931	-0.28583	0.004475	0.469915		-0.83749	1.20336	-1.03488	-1.45433	-0.23733
-3.05707	0.289325	1.4706	-1.78193	-0.59345	-0.4828		0.945138	0.783264	-0.34463	-1.00111	-1.02709		-1.25541	-0.4833	-0.31779	-0.04432	0.420386		-0.85939	1.15012	-1.12174	-1.41437	-0.31325
-3.04887	0.212651	1.35261	-1.79016	-0.66398	-0.5112		0.974774	0.852136	-0.40508	-1.10075	-1.13867		-1.26543	-0.52149	-0.33047	-0.1367	0.336727		-0.88145	1.06232	-1.2529	-1.42388	-0.40064
-3.04066	0.136036	1.26119	-1.80727	-0.67186	-0.51903		1.0002	0.914086	-0.46296	-1.14544	-1.22275		-1.28765	-0.5508	-0.3335	-0.234	0.207469		-0.87725	0.959607	-1.38597	-1.42733	-0.48078
-3.03246	0.090909	1.18465	-1.84201	-0.60782	-0.54427		1.01939	0.984818	-0.50538	-1.1614	-1.20444		-1.32503	-0.52739	-0.34127	-0.26862	0.05292		-0.84222	0.858679	-1.476	-1.38361	-0.5216
-3.02426	0.099255	1.09505	-1.88806	-0.49908	-0.61127		1.00752	1.08243	-0.52346	-1.20047	-1.05346		-1.35963	-0.4595	-0.37038	-0.21868	-0.08583		-0.80242	0.774677	-1.51209	-1.30735	-0.49739
-3.01605	0.143661	0.994344	-1.92083	-0.40364	-0.71012		0.961057	1.1985	-0.51806	-1.29134	-0.82652		-1.36204	-0.39735	-0.41706	-0.10858	-0.19262		-0.7869	0.711403	-1.52032	-1.25643	-0.40613
-3.00785	0.178949	0.914261	-1.90149	-0.37556	-0.80816		0.904979	1.30403	-0.50541	-1.41526	-0.62538		-1.3289	-0.38891	-0.4692	0.01615	-0.2735		-0.80183	0.669055	-1.5319	-1.26747	-0.27243
-2.99965	0.170765	0.879982	-1.8002	-0.42843	-0.88055		0.871764	1.3809	-0.50126	-1.52948	-0.5062		-1.27865	-0.44171	-0.52823	0.139304	-0.33984		-0.8147	0.66007	-1.54329	-1.33797	-0.14191
-2.99144	0.120896	0.89357	-1.61654	-0.54554	-0.91452		0.875277	1.46797	-0.50708	-1.59837	-0.45056		-1.24379	-0.50179	-0.61577	0.282432	-0.38417		-0.79928	0.685737	-1.53348	-1.45544	-0.05873
-2.98324	0.050783	0.921482	-1.39761	-0.66315	-0.89716		0.888664	1.6493	-0.51466	-1.61433	-0.42728		-1.24296	-0.51745	-0.73678	0.438319	-0.40357		-0.75033	0.723001	-1.49122	-1.60341	-0.03768
-2.97512	-0.01651	0.927543	-1.21029	-0.72423	-0.82835		0.883981	2.00614	-0.509	-1.60038	-0.4168		-1.26783	-0.48351	-0.86618	0.576085	-0.41777		-0.68664	0.735894	-1.4381	-1.7759	-0.06949
-2.96692	-0.06946	0.889252	-1.12112	-0.71734	-0.71659		0.852051	2.54019	-0.49805	-1.57296	-0.40975		-1.30217	-0.43692	-0.96669	0.666542	-0.4363		-0.63075	0.698154	-1.41863	-1.94217	-0.1299
-2.95871	-0.10576	0.798543	-1.1548	-0.67193	-0.58145		0.80771	3.17907	-0.50471	-1.52022	-0.38863		-1.32581	-0.41736	-1.02311	0.720997	-0.4479		-0.58383	0.618693	-1.45694	-2.07683	-0.1811
-2.95051	-0.12241	0.679791	-1.28252	-0.64617	-0.43037		0.767382	3.83964	-0.5478	-1.40406	-0.34174		-1.33099	-0.42695	-1.05687	0.764418	-0.43185		-0.54328	0.528109	-1.5413	-2.16601	-0.18555
-2.94231	-0.14055	0.576392	-1.43941	-0.66263	-0.25786		0.739688	4.46587	-0.61809	-1.22277	-0.28514		-1.31953	-0.44287	-1.09006	0.787829	-0.39526		-0.50964	0.463462	-1.62851	-2.19201	-0.11061
-2.9341	-0.18834	0.522406	-1.55933	-0.70256	-0.06902		0.732959	5.02819	-0.68166	-1.0247	-0.23714		-1.29842	-0.43616	-1.1245	0.778436	-0.37755		-0.48631	0.445995	-1.6794	-2.16163	0.043197
-2.9259	-0.27505	0.514894	-1.61671	-0.73186	0.113288		0.738012	5.48031	-0.72038	-0.87124	-0.20599		-1.27802	-0.40383	-1.14751	0.728998	-0.40913		-0.47447	0.46395	-1.68782	-2.09064	0.242462
-2.9177	-0.37072	0.524696	-1.62074	-0.75237	0.272304		0.729491	5.76359	-0.74401	-0.78469	-0.17985		-1.25321	-0.36069	-1.16183	0.665602	-0.48402		-0.4674	0.48454	-1.66892	-2.02153	0.428525
-2.90949	-0.42211	0.522027	-1.59707	-0.80132	0.416497		0.680005	5.85432	-0.7698	-0.72404	-0.15859		-1.21895	-0.32246	-1.18407	0.603431	-0.56958		-0.47418	0.47314	-1.6462	-1.98764	0.555217
-2.90129	-0.39808	0.49391	-1.56282	-0.89614	0.548869		0.592388	5.77774	-0.79281	-0.65542	-0.15525		-1.17576	-0.3017	-1.2122	0.510739	-0.63549		-0.50732	0.433789	-1.63495	-1.99946	0.61453
-2.89309	-0.30146	0.439786	-1.52664	-1.00562	0.662484		0.505757	5.59399	-0.78273	-0.57529	-0.16063		-1.13917	-0.30107	-1.23573	0.359597	-0.66387		-0.57139	0.387441	-1.64243	-2.04376	0.615335
-2.88497	-0.17691	0.366187	-1.51106	-1.06144	0.745195		0.463014	5.35832	-0.71879	-0.52156	-0.14231		-1.13401	-0.31474	-1.23877	0.176364	-0.66434		-0.64013	0.344888	-1.66608	-2.07314	0.579138
-2.87676	-0.08031	0.292779	-1.52528	-1.04413	0.806213		0.475056	5.10539	-0.618	-0.53069	-0.07803		-1.1786	-0.3266	-1.21629	0.036446	-0.65795		-0.66486	0.293523	-1.68713	-2.0606	0.51895
-2.86856	-0.03846	0.231375	-1.55679	-0.99317	0.883684		0.509869	4.86722	-0.51585	-0.58065	0.018637		-1.27751	-0.33062	-1.16692	-0.01579	-0.66135		-0.61857	0.23149	-1.68069	-2.01298	0.436573
-2.86036	-0.04057	0.177856	-1.58065	-0.96829	0.996165		0.536791	4.64339	-0.4317	-0.64073	0.123009		-1.38744	-0.32437	-1.09003	-0.01105	-0.67942		-0.51569	0.179854	-1.64161	-1.97061	0.331686
-2.85215	-0.04616	0.124438	-1.57409	-0.98358	1.11224		0.54704	4.42953	-0.35708	-0.69656	0.234781		-1.44832	-0.31368	-0.99957	-0.0288	-0.69757		-0.40735	0.163918	-1.59744	-1.95835	0.21159
-2.84395	-0.0241	0.074697	-1.53516	-1.01056	1.16974		0.553158	4.23272	-0.28082	-0.74778	0.367114		-1.43132	-0.30752	-0.91144	-0.11331	-0.7064		-0.33744	0.190304	-1.58026	-1.94354	0.097757
-2.83575	0.022835	0.050322	-1.47667	-1.04453	1.14732		0.562154	4.06645	-0.21134	-0.78203	0.524526		-1.36439	-0.29927	-0.83403	-0.2351	-0.70024		-0.31699	0.219271	-1.59426	-1.8818	-0.00164
-2.82754	0.065851	0.056442	-1.41867	-1.09897	1.08		0.551716	3.93375	-0.17718	-0.76499	0.679758		-1.30599	-0.29208	-0.75922	-0.32922	-0.66494		-0.32156	0.215363	-1.61119	-1.75547	-0.09569
-2.81934	0.087577	0.081866	-1.37923	-1.19968	1.01298		0.509323	3.81271	-0.18991	-0.67155	0.784858		-1.29479	-0.2946	-0.67921	-0.35181	-0.57155		-0.32591	0.170691	-1.59871	-1.60924	-0.19395
-2.81114	0.088649	0.108225	-1.37541	-1.33255	0.97526		0.446523	3.67744	-0.23821	-0.51902	0.79703		-1.32304	-0.30949	-0.60617	-0.31925	-0.3959		-0.32994	0.106203	-1.55049	-1.51139	-0.28722
-2.80294	0.069852	0.127173	-1.41383	-1.4396	0.954495		0.390173	3.52458	-0.28635	-0.3878	0.703903		-1.34887	-0.32963	-0.55826	-0.25894	-0.15582		-0.34184	0.055999	-1.47977	-1.51313	-0.35624
-2.79482	0.029317	0.143897	-1.47112	-1.47418	0.929886		0.351222	3.37551	-0.30326	-0.33882	0.529634		-1.34425	-0.33638	-0.54325	-0.1837	0.109757		-0.3667	0.03026	-1.41075	-1.61564	-0.40056
-2.78661	-0.02457	0.13982	-1.51566	-1.41877	0.894424		0.318046	3.22841	-0.28934	-0.35045	0.326331		-1.3047	-0.32395	-0.54583	-0.11578	0.366431		-0.38935	0.019606	-1.35233	-1.76348	-0.44516
-2.77841	-0.06343	0.096504	-1.52886	-1.30766	0.84471		0.278043	3.07723	-0.26743	-0.35898	0.156662		-1.24962	-0.30363	-0.54855	-0.07853	0.589778		-0.39825	-0.00122	-1.30605	-1.87359	-0.50945
-2.77021	-0.06589	0.023533	-1.51725	-1.19913	0.782486		0.23022	2.92933	-0.26533	-0.32598	0.05237		-1.2109	-0.30132	-0.5427	-0.11951	0.780253		-0.40116	-0.03054	-1.2907	-1.86626	-0.567
-2.762	-0.02963	-0.05095	-1.49774	-1.13221	0.717287		0.196368	2.80389	-0.27337	-0.27717	0.0138		-1.20696	-0.32964	-0.52473	-0.25851	0.932841		-0.41086	-0.04814	-1.31681	-1.74211	-0.56822
-2.7538	0.039111	-0.10419	-1.48271	-1.1061	0.6772		0.189925	2.70333	-0.25233	-0.24778	0.024607		-1.23773	-0.37047	-0.47653	-0.46462	1.04295		-0.43922	-0.04866	-1.37303	-1.57597	-0.48847
-2.7456	0.132496	-0.13724	-1.47261	-1.08729	0.687351		0.197537	2.60155	-0.17558	-0.24731	0.05938		-1.27506	-0.4044	-0.35796	-0.65146	1.10512		-0.46889	-0.04306	-1.41171	-1.4686	-0.34525
-2.73739	0.245315	-0.16324	-1.45971	-1.06233	0.75302		0.198622	2.48349	-0.05439	-0.25375	0.095273		-1.29238	-0.42309	-0.12612	-0.72308	1.11538		-0.48126	-0.04445	-1.39891	-1.47579	-0.18989
-2.72919	0.347604	-0.20206	-1.44263	-1.03374	0.862799		0.178046	2.35779	0.074618	-0.2604	0.124513		-1.28575	-0.44361	0.234235	-0.647	1.07991		-0.46452	-0.05158	-1.35124	-1.56905	-0.06375
-2.72099	0.401967	-0.26013	-1.41739	-1.01326	0.979209		0.132509	2.25262	0.189712	-0.26716	0.169503		-1.26911	-0.48951	0.676058	-0.45408	1.02014		-0.39687	-0.05689	-1.32387	-1.70334	0.010645
-2.71278	0.39861	-0.32128	-1.38678	-1.00341	1.06005		0.065643	2.18445	0.282139	-0.2445	0.2523		-1.26618	-0.5539	1.11304	-0.2411	0.960074		-0.25133	-0.05452	-1.35916	-1.83066	0.029224
-2.70458	0.355593	-0.36584	-1.36418	-0.99117	1.07312		-0.00507	2.13969	0.348573	-0.17649	0.373574		-1.27986	-0.59433	1.47507	-0.11132	0.908233		-0.00973	-0.04929	-1.43395	-1.9216	-0.00129
-2.69646	0.307498	-0.37912	-1.36585	-0.97236	1.01926		-0.05044	2.11277	0.387211	-0.05955	0.521935		-1.29974	-0.57661	1.73281	-0.10468	0.861083		0.306561	-0.0517	-1.49757	-1.95962	-0.06103
-2.68826	0.263111	-0.36204	-1.40071	-0.9526	0.912076		-0.03765	2.1134	0.405665	0.090616	0.66469		-1.3095	-0.51983	1.89423	-0.19123	0.798335		0.639161	-0.06824	-1.52145	-1.9205	-0.1139
-2.68005	0.20993	-0.32727	-1.44298	-0.94541	0.775178		0.018386	2.14762	0.415976	0.275893	0.774674		-1.30374	-0.46877	1.97321	-0.29851	0.712775		0.938819	-0.10319	-1.51092	-1.80453	-0.13161
-2.67185	0.138595	-0.29661	-1.46006	-0.94033	0.646105		0.050348	2.19349	0.427904	0.510121	0.835255		-1.29254	-0.47269	1.99131	-0.37713	0.614903		1.18702	-0.15157	-1.49191	-1.65742	-0.11343
-2.66365	0.061636	-0.28187	-1.44159	-0.93194	0.560246		0.010235	2.20703	0.446484	0.766986	0.850137		-1.2911	-0.53725	1.97566	-0.41354	0.51403		1.38772	-0.20876	-1.48427	-1.56411	-0.08915
-2.65544	0.013826	-0.29202	-1.41085	-0.91987	0.524042		-0.08579	2.16718	0.472603	0.984592	0.844458		-1.30699	-0.63038	1.94193	-0.40792	0.409321		1.53348	-0.26081	-1.49092	-1.5817	-0.09137
-2.64724	0.01547	-0.33238	-1.40299	-0.90614	0.495491		-0.16698	2.08263	0.514874	1.09196	0.839754		-1.33009	-0.72012	1.89442	-0.37381	0.286377		1.61816	-0.29202	-1.49726	-1.69757	-0.11764
-2.63904	0.064091	-0.38745	-1.42005	-0.89276	0.431882		-0.17931	1.98409	0.575884	1.06119	0.83438		-1.34754	-0.79473	1.82704	-0.34058	0.138136		1.65488	-0.29791	-1.48923	-1.8413	-0.14595
-2.63083	0.139816	-0.43391	-1.43848	-0.86691	0.327299		-0.14373	1.88885	0.646641	0.913123	0.808539		-1.35226	-0.86145	1.74853	-0.3451	-0.03534		1.67313	-0.2784	-1.45631	-1.9372	-0.15374
-2.62263	0.223128	-0.44444	-1.43451	-0.83113	0.218435		-0.12111	1.78748	0.719519	0.702889	0.760495		-1.34585	-0.9116	1.68042	-0.38796	-0.20847		1.68146	-0.25094	-1.4075	-1.96369	-0.13026
-2.61443	0.30299	-0.42797	-1.4121	-0.79423	0.156768		-0.15226	1.66403	0.782315	0.510192	0.713119		-1.33551	-0.94088	1.63123	-0.43281	-0.33837		1.65733	-0.23393	-1.36636	-1.94223	-0.06854
-2.60631	0.367953	-0.42229	-1.39744	-0.78393	0.146975		-0.22735	1.51672	0.823326	0.373377	0.685893		-1.32182	-0.95067	1.59178	-0.41124	-0.4024		1.58039	-0.22694	-1.34781	-1.90061	0.036345
-2.5981	0.404747	-0.44717	-1.40693	-0.84654	0.158046		-0.31816	1.37953	0.834591	0.284406	0.674901		-1.30774	-0.93569	1.55513	-0.30034	-0.40996		1.46751	-0.2127	-1.35741	-1.82816	0.170226
-2.5899	0.403227	-0.48664	-1.43978	-1.0064	0.155867		-0.40324	1.28462	0.830317	0.212521	0.664525		-1.29893	-0.89708	1.53244	-0.15671	-0.40599		1.36576	-0.17589	-1.39671	-1.70966	0.293646
-2.5817	0.375741	-0.49676	-1.48107	-1.24087	0.131848		-0.46778	1.22749	0.834136	0.138983	0.660536		-1.31268	-0.84459	1.52546	-0.062	-0.43323		1.30562	-0.13056	-1.46651	-1.58024	0.360366
-2.57349	0.341837	-0.45557	-1.51467	-1.44891	0.102846		-0.51105	1.16935	0.848666	0.074505	0.675842		-1.35276	-0.80785	1.52165	-0.06925	-0.49055		1.28599	-0.09544	-1.55193	-1.50585	0.354867
-2.56529	0.311934	-0.37419	-1.52545	-1.52874	0.082431		-0.53084	1.08373	0.855482	0.020526	0.708243		-1.39748	-0.81055	1.49503	-0.15915	-0.54718		1.28849	-0.07079	-1.61667	-1.51805	0.298078
-2.55709	0.281303	-0.27867	-1.51449	-1.4758	0.078489		-0.53746	0.987247	0.829873	-0.03973	0.726477		-1.42628	-0.85103	1.42639	-0.27508	-0.57585		1.28971	-0.04766	-1.63488	-1.56229	0.23196
-2.54888	0.242262	-0.19397	-1.50322	-1.38212	0.077654		-0.55239	0.91235	0.773115	-0.11788	0.708567		-1.42637	-0.90855	1.31888	-0.37173	-0.58597		1.28236	-0.01493	-1.61166	-1.57687	0.19371
-2.54068	0.208332	-0.13138	-1.51544	-1.33992	0.069325		-0.58225	0.870654	0.71713	-0.18199	0.666963		-1.41229	-0.95952	1.18472	-0.42892	-0.60507		1.26013	0.014939	-1.5845	-1.56774	0.200283
-2.53248	0.192108	-0.11751	-1.55724	-1.3378	0.054225		-0.61089	0.829562	0.69437	-0.20341	0.619455		-1.40472	-1.00065	1.04348	-0.42424	-0.65073		1.23105	0.027851	-1.58259	-1.59119	0.262366
-2.52427	0.198531	-0.1626	-1.60592	-1.31914	0.034712		-0.62245	0.767123	0.716817	-0.18971	0.570708		-1.40558	-1.02396	0.909632	-0.27215	-0.71746		1.20476	0.032611	-1.60905	-1.69146	0.37407
-2.51615	0.216665	-0.24535	-1.63969	-1.27455	0.010361		-0.63548	0.697288	0.763231	-0.17542	0.506841		-1.39464	-1.00648	0.795694	0.096442	-0.78637		1.17326	0.05627	-1.65009	-1.81486	0.514396
-2.50795	0.230422	-0.33154	-1.65245	-1.25651	-0.01673		-0.68536	0.647875	0.801848	-0.18979	0.43391		-1.35009	-0.9352	0.698643	0.655984	-0.8441		1.12203	0.113933	-1.68161	-1.87661	0.648907
-2.49975	0.238073	-0.39787	-1.66237	-1.30362	-0.03346		-0.77728	0.640633	0.813529	-0.22104	0.378689		-1.28698	-0.83228	0.606797	1.26954	-0.88422		1.04202	0.193737	-1.68822	-1.83924	0.735087
-2.49155	0.232604	-0.43009	-1.69047	-1.38786	-0.03903		-0.8684	0.666204	0.789936	-0.25132	0.350297		-1.23582	-0.74383	0.521909	1.76031	-0.91058		0.948429	0.285159	-1.66498	-1.7243	0.759818
-2.48334	0.202194	-0.41782	-1.72648	-1.46225	-0.04713		-0.91592	0.701971	0.74098	-0.26045	0.339683		-1.20809	-0.69916	0.442758	2.03351	-0.9236		0.867989	0.392887	-1.61696	-1.59332	0.735746
-2.47514	0.135127	-0.37222	-1.74701	-1.50825	-0.07382		-0.92144	0.721539	0.682737	-0.23682	0.327107		-1.18362	-0.69414	0.374012	2.12552	-0.92436		0.814193	0.537899	-1.56392	-1.5137	0.696073
-2.46693	0.0408	-0.31126	-1.73501	-1.53843	-0.12084		-0.91422	0.711999	0.62747	-0.18748	0.309773		-1.1254	-0.69093	0.312931	2.12068	-0.91894		0.777904	0.720407	-1.52883	-1.54538	0.662215
-2.45873	-0.04942	-0.2488	-1.69744	-1.5486	-0.17346		-0.92001	0.688471	0.57447	-0.12084	0.295329		-1.02172	-0.65413	0.248349	2.06123	-0.91167		0.740781	0.922145	-1.52675	-1.67623	0.630281
-2.45053	-0.11016	-0.1802	-1.65879	-1.52545	-0.21728		-0.93626	0.668727	0.528725	-0.06947	0.277339		-0.89299	-0.57085	0.178151	1.95425	-0.90162		0.706098	1.10399	-1.55671	-1.8286	0.588521
-2.44233	-0.13097	-0.09588	-1.63506	-1.47766	-0.24414		-0.96022	0.661229	0.48955	-0.05398	0.243269		-0.76907	-0.4542	0.10672	1.81952	-0.88205		0.68513	1.23738	-1.60602	-1.89868	0.541559
-2.43412	-0.1202	-0.01463	-1.62522	-1.45085	-0.25444		-0.99757	0.650231	0.447569	-0.07167	0.189778		-0.66065	-0.3315	0.043891	1.6853	-0.86101		0.678974	1.33179	-1.65352	-1.84926	0.523266
-2.426	-0.09166	0.045443	-1.60838	-1.49638	-0.25322		-1.03958	0.616812	0.394515	-0.09627	0.133835		-0.57021	-0.21676	-0.01295	1.57152	-0.84956		0.662499	1.40437	-1.6849	-1.73416	0.560378
-2.4178	-0.06517	0.090837	-1.57746	-1.60982	-0.25612		-1.06073	0.569558	0.332574	-0.09303	0.089541		-0.50692	-0.1186	-0.06691	1.46698	-0.85661		0.60641	1.47095	-1.70176	-1.61929	0.650744
-2.4096	-0.06429	0.168571	-1.54383	-1.72233	-0.29705		-1.03804	0.527956	0.287245	-0.05572	0.070432		-0.48437	-0.03314	-0.11351	1.36377	-0.88149		0.512554	1.52041	-1.71254	-1.5167	0.756804
-2.40139	-0.10214	0.315279	-1.51681	-1.73254	-0.38263		-0.98785	0.501131	0.272923	0.006341	0.096021		-0.50602	0.033256	-0.14983	1.25203	-0.90247		0.422087	1.53401	-1.72459	-1.403	0.836871
-2.39319	-0.17693	0.505492	-1.49702	-1.58399	-0.48241		-0.9435	0.475575	0.269509	0.045018	0.176559		-0.54464	0.058455	-0.18381	1.13089	-0.90775		0.37628	1.51668	-1.72378	-1.28314	0.871027
-2.38499	-0.27427	0.675437	-1.47384	-1.32534	-0.54832		-0.92875	0.436248	0.240141	-0.00054	0.295706		-0.56347	0.026334	-0.22638	0.994484	-0.89017		0.361624	1.48584	-1.69444	-1.18317	0.860437
-2.37678	-0.3807	0.761398	-1.43947	-1.06415	-0.55493		-0.95801	0.383305	0.171494	-0.14887	0.419545		-0.54189	-0.0638	-0.28255	0.853745	-0.84543		0.342199	1.47637	-1.63224	-1.1209	0.821855
-2.36858	-0.4728	0.75363	-1.39235	-0.9088	-0.51752		-1.02054	0.333141	0.097224	-0.34136	0.527143		-0.49384	-0.17871	-0.34271	0.770375	-0.78315		0.295678	1.50114	-1.54315	-1.09964	0.772735
-2.36038	-0.53145	0.693	-1.33843	-0.88667	-0.46029		-1.0895	0.299007	0.050592	-0.4862	0.603699		-0.45856	-0.27292	-0.38893	0.777033	-0.72791		0.216639	1.55403	-1.44971	-1.10302	0.729284
-2.35217	-0.55716	0.637533	-1.28511	-0.95058	-0.40724		-1.13023	0.281211	0.037431	-0.54067	0.645157		-0.46343	-0.32012	-0.42087	0.841249	-0.71296		0.110724	1.61285	-1.38483	-1.12779	0.689833
-2.34397	-0.56208	0.626826	-1.24301	-1.04075	-0.36596		-1.12293	0.271205	0.03141	-0.52625	0.642089		-0.50946	-0.33142	-0.45963	0.88391	-0.74505		-0.01687	1.65936	-1.38855	-1.15873	0.64142
-2.33585	-0.57167	0.646278	-1.22723	-1.10737	-0.34043		-1.0783	0.256567	0.007564	-0.49707	0.58671		-0.56108	-0.3473	-0.52636	0.845173	-0.79957		-0.13686	1.69149	-1.46377	-1.15358	0.576619
-2.32765	-0.58955	0.663038	-1.23749	-1.12613	-0.3415		-1.02133	0.240317	-0.02906	-0.46581	0.497837		-0.58736	-0.38888	-0.62629	0.746773	-0.83445		-0.21072	1.70998	-1.57285	-1.09107	0.489944
-2.31944	-0.59772	0.656802	-1.2599	-1.08937	-0.38121		-0.97013	0.242775	-0.06528	-0.41757	0.403139		-0.58873	-0.44172	-0.73714	0.638078	-0.80242		-0.20286	1.72014	-1.67002	-1.00524	0.379989
-2.31124	-0.57052	0.631319	-1.26301	-1.01421	-0.46295		-0.91717	0.288104	-0.09271	-0.36563	0.324887		-0.58293	-0.48058	-0.83117	0.565051	-0.67999		-0.12563	1.72805	-1.71957	-0.97613	0.257257
-2.30304	-0.49775	0.59596	-1.22526	-0.93351	-0.57138		-0.85907	0.397126	-0.11666	-0.34636	0.25605		-0.58377	-0.49909	-0.89736	0.54227	-0.48229		-0.0418	1.74737	-1.72838	-1.04485	0.155595
-2.29483	-0.39998	0.552659	-1.15157	-0.86786	-0.67914		-0.82091	0.568304	-0.14044	-0.38106	0.175658		-0.57487	-0.50617	-0.94044	0.563945	-0.27248		0.004802	1.78368	-1.72247	-1.19299	0.116716
-2.28663	-0.30624	0.499147	-1.06165	-0.80346	-0.75617		-0.84924	0.814618	-0.16291	-0.43879	0.086632		-0.53189	-0.50662	-0.98333	0.614548	-0.12347		0.010817	1.83538	-1.73192	-1.35506	0.140864
-2.27843	-0.2519	0.439888	-0.98234	-0.70474	-0.79352		-0.96407	1.18066	-0.18034	-0.47623	0.011269		-0.45031	-0.49041	-1.03093	0.654878	-0.06678		-0.00046	1.90249	-1.77428	-1.45288	0.192457
-2.27022	-0.24789	0.389614	-0.9189	-0.57149	-0.79985		-1.1283	1.70959	-0.19045	-0.47507	-0.01586		-0.35109	-0.44692	-1.06104	0.648255	-0.06476		-0.00242	1.98851	-1.83943	-1.45796	0.23536
-2.26202	-0.28002	0.346218	-0.86464	-0.43739	-0.78882		-1.27112	2.37231	-0.19619	-0.43458	0.017941		-0.26523	-0.3983	-1.04036	0.570818	-0.05624		0.005566	2.09993	-1.89441	-1.38625	0.279347
-2.25382	-0.33971	0.318539	-0.81194	-0.35078	-0.77873		-1.32573	3.04284	-0.19942	-0.37874	0.107477		-0.20659	-0.37278	-0.96104	0.430019	-0.02592		-0.00152	2.2258	-1.9038	-1.27921	0.354773
-2.24561	-0.41816	0.319983	-0.75723	-0.33374	-0.77441		-1.27828	3.57896	-0.20635	-0.33016	0.25454		-0.17765	-0.37782	-0.84925	0.245443	-0.0064		-0.04351	2.33919	-1.85974	-1.16233	0.451467
-2.23749	-0.50833	0.352782	-0.69532	-0.36065	-0.78203		-1.16279	3.93121	-0.21996	-0.32101	0.468292		-0.17613	-0.4022	-0.73143	0.043865	-0.03224		-0.10777	2.40895	-1.78669	-1.03865	0.515119
-2.22929	-0.59262	0.405098	-0.60983	-0.38522	-0.80053		-1.03866	4.13003	-0.24094	-0.34672	0.745109		-0.19505	-0.42778	-0.62683	-0.13962	-0.08595		-0.15998	2.42474	-1.72946	-0.92293	0.500948
-2.22109	-0.65583	0.441828	-0.49566	-0.38114	-0.81539		-0.95637	4.24865	-0.26709	-0.37116	1.03298		-0.21763	-0.45596	-0.54555	-0.26375	-0.12391		-0.17041	2.40399	-1.71556	-0.8491	0.432234
-2.21288	-0.69571	0.436365	-0.36659	-0.37129	-0.80052		-0.92789	4.32022	-0.28884	-0.3789	1.25892		-0.2209	-0.49944	-0.49359	-0.28511	-0.12355		-0.13822	2.35796	-1.73583	-0.85165	0.376408
-2.20468	-0.72263	0.396637	-0.256	-0.35765	-0.74182		-0.9418	4.34956	-0.30322	-0.39928	1.38281		-0.19994	-0.56696	-0.48024	-0.21117	-0.09098		-0.10448	2.28584	-1.76274	-0.92684	0.372478
-2.19648	-0.74844	0.378178	-0.18985	-0.29894	-0.67497		-0.96789	4.34902	-0.30715	-0.4691	1.42345		-0.17452	-0.64871	-0.49447	-0.08981	-0.0528		-0.11368	2.18775	-1.77819	-1.03564	0.397058
-2.18828	-0.77643	0.459631	-0.16325	-0.13815	-0.64835		-0.98917	4.34379	-0.29534	-0.56023	1.42137		-0.18316	-0.72095	-0.51388	0.017518	-0.02529		-0.17935	2.0814	-1.78998	-1.12118	0.39816
-2.18007	-0.80923	0.67462	-0.15393	0.136498	-0.68661		-1.00968	4.34285	-0.25479	-0.59914	1.3987		-0.23828	-0.76925	-0.52346	0.09901	-0.02226		-0.27494	2.00266	-1.81254	-1.13882	0.361456
-2.17187	-0.84277	0.996218	-0.13774	0.427083	-0.76929		-1.02583	4.33073	-0.17388	-0.5499	1.36543		-0.31935	-0.78229	-0.52839	0.22258	-0.05278		-0.37501	1.97307	-1.84893	-1.08747	0.31681
-2.16366	-0.87173	1.33051	-0.1027	0.615166	-0.84212		-1.02355	4.28189	-0.06639	-0.4626	1.32831		-0.39117	-0.7754	-0.541	0.449602	-0.10741		-0.46774	1.97428	-1.87784	-1.01227	0.299805
-2.15546	-0.87685	1.60815	-0.04446	0.646305	-0.86286		-0.98853	4.17857	0.032922	-0.42084	1.30642		-0.43017	-0.77841	-0.56776	0.787508	-0.16442		-0.5507	1.97294	-1.87746	-0.99157	0.310214
-2.14734	-0.84405	1.82966	0.032149	0.560795	-0.81505		-0.93087	4.02375	0.082551	-0.44085	1.30168		-0.44638	-0.80474	-0.60256	1.16628	-0.20315		-0.63328	1.94557	-1.85741	-1.04801	0.325569
-2.13914	-0.79203	2.02314	0.116193	0.425109	-0.7152		-0.88727	3.84219	0.068777	-0.46383	1.29781		-0.45796	-0.84052	-0.62879	1.51527	-0.22738		-0.70761	1.89439	-1.83695	-1.1305	0.327009
-2.13094	-0.75215	2.20126	0.191848	0.269722	-0.60572		-0.88858	3.67295	0.026878	-0.40992	1.28003		-0.4817	-0.85397	-0.63529	1.82817	-0.24893		-0.76571	1.82805	-1.82928	-1.17202	0.304412
-2.12273	-0.7495	2.33855	0.243275	0.097702	-0.53903		-0.92806	3.52867	0.008436	-0.27791	1.24114		-0.51492	-0.82836	-0.61795	2.12778	-0.27293		-0.80612	1.75307	-1.8396	-1.16022	0.257135
-2.11453	-0.77275	2.39978	0.264978	-0.09536	-0.54343		-0.9637	3.39507	0.049617	-0.15563	1.18826		-0.53601	-0.77869	-0.58426	2.44224	-0.30256		-0.83786	1.66754	-1.85942	-1.15649	0.186421
-2.10633	-0.78946	2.3812	0.248919	-0.28415	-0.60002		-0.9659	3.25008	0.149736	-0.12745	1.12595		-0.5349	-0.73353	-0.54616	2.73434	-0.33666		-0.8779	1.57524	-1.86851	-1.20213	0.108126
-2.09812	-0.77728	2.31553	0.19564	-0.42548	-0.67134		-0.9394	3.08821	0.285174	-0.1959	1.07352		-0.51587	-0.71222	-0.51317	2.9398	-0.37177		-0.92123	1.50503	-1.83989	-1.28511	0.04266
-2.08992	-0.72791	2.23198	0.11696	-0.48737	-0.73757		-0.90535	2.93125	0.425269	-0.26883	1.05608		-0.49981	-0.7126	-0.4918	3.00482	-0.40288		-0.95343	1.5012	-1.76908	-1.3517	-0.00354
-2.08172	-0.6594	2.13767	0.024259	-0.46235	-0.79422		-0.86804	2.7892	0.539651	-0.28459	1.06688		-0.50149	-0.7148	-0.47029	2.90456	-0.42786		-0.95978	1.58838	-1.68189	-1.36964	-0.03128
-2.07351	-0.59288	2.03851	-0.06863	-0.39647	-0.83824		-0.81782	2.66572	0.604852	-0.25398	1.07309		-0.51729	-0.69304	-0.43634	2.68136	-0.44597		-0.9419	1.72832	-1.62408	-1.36062	-0.05037
-2.06531	-0.554	1.93779	-0.15596	-0.36297	-0.86967		-0.75632	2.56024	0.621859	-0.22822	1.03699		-0.53553	-0.64339	-0.3792	2.43894	-0.4659		-0.91358	1.85089	-1.62172	-1.35761	-0.06357
-2.05719	-0.55473	1.84541	-0.23494	-0.40662	-0.89677		-0.7049	2.45571	0.622971	-0.24289	0.9536		-0.54875	-0.57736	-0.30465	2.29455	-0.49336		-0.88051	1.896	-1.65381	-1.37837	-0.07365
-2.04898	-0.58446	1.77651	-0.29871	-0.49699	-0.923		-0.70128	2.34204	0.638581	-0.27769	0.843882		-0.56277	-0.52084	-0.23092	2.28486	-0.51848		-0.85084	1.84868	-1.68716	-1.41799	-0.08042
-2.04078	-0.61937	1.74041	-0.34887	-0.56335	-0.95075		-0.74928	2.21038	0.676771	-0.31932	0.722747		-0.58024	-0.48967	-0.17216	2.3491	-0.53473		-0.82469	1.73869	-1.70474	-1.47407	-0.08059
-2.03258	-0.6345	1.73031	-0.39346	-0.58531	-0.97292		-0.81167	2.07531	0.718499	-0.36955	0.595324		-0.59722	-0.47755	-0.14118	2.38645	-0.53141		-0.79886	1.61346	-1.71061	-1.56335	-0.07602
-2.02438	-0.62907	1.72163	-0.4444	-0.61906	-0.99315		-0.8399	1.96092	0.745281	-0.4319	0.471273		-0.61591	-0.4806	-0.13569	2.3374	-0.50695		-0.75619	1.5238	-1.7147	-1.68707	-0.07813
-2.01617	-0.61903	1.70773	-0.49833	-0.7409	-1.01883		-0.81654	1.87444	0.767888	-0.48298	0.38026		-0.64768	-0.50276	-0.14535	2.2128	-0.47362		-0.68312	1.48475	-1.7294	-1.80191	-0.10536
-2.00797	-0.61543	1.68972	-0.54426	-0.92731	-1.03533		-0.77973	1.79859	0.814307	-0.48936	0.343334		-0.70144	-0.55238	-0.15128	2.06571	-0.45278		-0.59035	1.48947	-1.75558	-1.82906	-0.1601
-1.99977	-0.60871	1.67563	-0.57593	-1.09211	-1.0235		-0.77446	1.71472	0.908816	-0.45529	0.356234		-0.76624	-0.61048	-0.13121	1.9589	-0.45946		-0.51938	1.50303	-1.77993	-1.74254	-0.23057
-1.99156	-0.57887	1.66092	-0.58988	-1.18133	-0.98296		-0.82138	1.62968	1.03208	-0.40645	0.391769		-0.81535	-0.63967	-0.07181	1.92201	-0.48329		-0.51137	1.48953	-1.79189	-1.59181	-0.30116
-1.98336	-0.51876	1.61828	-0.57986	-1.21395	-0.95295		-0.90422	1.55407	1.14047	-0.36964	0.41924		-0.82048	-0.62708	0.035004	1.93633	-0.51336		-0.55806	1.44415	-1.78366	-1.45535	-0.35646
-1.97516	-0.44521	1.53927	-0.53426	-1.23166	-0.9615		-0.9827	1.48946	1.18993	-0.3545	0.417179		-0.78658	-0.59021	0.195136	1.94362	-0.53398		-0.61489	1.36801	-1.76154	-1.36532	-0.38158
-1.96704	-0.38591	1.44719	-0.44835	-1.23223	-0.98016		-1.02018	1.42081	1.15929	-0.3772	0.380584		-0.74571	-0.57055	0.409993	1.87309	-0.54212		-0.63114	1.28103	-1.73193	-1.30016	-0.36286
-1.95883	-0.3531	1.38335	-0.34002	-1.20769	-0.94665		-0.9828	1.34177	1.07443	-0.45304	0.324701		-0.72777	-0.57792	0.655441	1.72083	-0.55421		-0.58953	1.21762	-1.69562	-1.25448	-0.30707
-1.95063	-0.34276	1.36745	-0.23708	-1.16406	-0.81902		-0.87826	1.25815	0.970817	-0.5615	0.269521		-0.74498	-0.58602	0.889864	1.52886	-0.57118		-0.51545	1.20981	-1.65524	-1.23266	-0.24148
-1.94243	-0.34283	1.38467	-0.15636	-1.11624	-0.61576		-0.76799	1.17397	0.875739	-0.64454	0.236544		-0.78777	-0.57521	1.08159	1.35893	-0.58296		-0.44242	1.24385	-1.6109	-1.23957	-0.19846
-1.93422	-0.33158	1.40715	-0.09589	-1.06246	-0.38862		-0.72884	1.09301	0.786117	-0.63958	0.223305		-0.84492	-0.5594	1.23253	1.26329	-0.57457		-0.39583	1.26104	-1.5623	-1.26039	-0.1927
-1.92602	-0.29172	1.40382	-0.04583	-0.96327	-0.18264		-0.78597	1.01771	0.68826	-0.56772	0.200167		-0.9048	-0.57496	1.3631	1.25632	-0.55239		-0.38143	1.21381	-1.50082	-1.27544	-0.21082
-1.91782	-0.21449	1.364	0.008556	-0.81542	-0.01016		-0.87948	0.958299	0.583051	-0.51683	0.160743		-0.96231	-0.62394	1.47638	1.32605	-0.54455		-0.40898	1.10551	-1.42536	-1.28427	-0.23567
-1.90961	-0.12415	1.29588	0.072037	-0.67226	0.150904		-0.92447	0.90998	0.484925	-0.55597	0.128144		-1.01992	-0.66501	1.55108	1.39927	-0.57938		-0.4862	0.982158	-1.34835	-1.28537	-0.24999
-1.90141	-0.06253	1.22804	0.136378	-0.60719	0.302909		-0.88572	0.851129	0.41556	-0.66764	0.138798		-1.07633	-0.64811	1.56686	1.38353	-0.66264		-0.5927	0.89098	-1.27251	-1.27639	-0.25286
-1.89321	-0.04813	1.18718	0.183022	-0.64858	0.430199		-0.80354	0.768662	0.375431	-0.76601	0.201744		-1.13125	-0.56676	1.53672	1.243	-0.7719		-0.69037	0.844843	-1.18693	-1.23931	-0.25628
-1.885	-0.06967	1.1844	0.198517	-0.75505	0.511479		-0.73572	0.669661	0.34969	-0.81307	0.288961		-1.17586	-0.46593	1.49152	1.03874	-0.88788		-0.73452	0.834109	-1.07259	-1.1685	-0.27921
-1.87688	-0.09206	1.20353	0.185531	-0.8549	0.543602		-0.71469	0.587091	0.324733	-0.82526	0.363768		-1.20662	-0.40391	1.43678	0.883256	-1.00442		-0.71516	0.845107	-0.94521	-1.09532	-0.33674
-1.86868	-0.09843	1.22185	0.14858	-0.89105	0.538745		-0.73994	0.549414	0.299091	-0.83719	0.407777		-1.22908	-0.41383	1.35616	0.829312	-1.13234		-0.66633	0.858382	-0.85078	-1.04206	-0.41232
-1.86048	-0.101	1.22918	0.10649	-0.8722	0.522578		-0.78689	0.548757	0.278736	-0.84748	0.43988		-1.24694	-0.47578	1.23491	0.845399	-1.2622		-0.63911	0.845569	-0.82346	-1.0134	-0.4693
-1.85227	-0.11636	1.21524	0.075598	-0.85607	0.509233		-0.82613	0.545132	0.270742	-0.82009	0.479602		-1.26302	-0.53786	1.08905	0.855624	-1.37639		-0.66342	0.799637	-0.85769	-0.99476	-0.47859
-1.84407	-0.14966	1.18253	0.053315	-0.90497	0.485155		-0.82898	0.489155	0.271542	-0.74724	0.527216		-1.26632	-0.5441	0.948912	0.817945	-1.46782		-0.71679	0.735511	-0.90937	-0.98521	-0.43856
-1.83587	-0.18797	1.13971	0.021668	-1.03887	0.451396		-0.79316	0.37561	0.260491	-0.64387	0.575545		-1.24737	-0.47911	0.837933	0.738748	-1.53554		-0.75474	0.675392	-0.94271	-0.99892	-0.38076
-1.82767	-0.22288	1.09036	-0.04475	-1.22755	0.41863		-0.73659	0.242571	0.220647	-0.56244	0.615665		-1.21321	-0.37823	0.768288	0.646234	-1.58379		-0.75608	0.632378	-0.95446	-1.05563	-0.33337
-1.81946	-0.25626	1.03518	-0.14024	-1.42549	0.390921		-0.68466	0.139375	0.149544	-0.56496	0.64421		-1.18537	-0.28955	0.741709	0.569688	-1.60467		-0.74522	0.603312	-0.96723	-1.16302	-0.30576
-1.81126	-0.29397	0.962493	-0.22877	-1.59201	0.354803		-0.65083	0.088496	0.063468	-0.6533	0.652717		-1.17436	-0.25234	0.75161	0.530464	-1.59566		-0.75251	0.582405	-0.99234	-1.29039	-0.2887
-1.80306	-0.33614	0.868123	-0.27554	-1.72056	0.298171		-0.61872	0.075098	-0.00981	-0.7602	0.63166		-1.17948	-0.24886	0.77683	0.535767	-1.57487		-0.77491	0.552805	-1.02506	-1.40547	-0.27513
-1.79485	-0.36006	0.766532	-0.2885	-1.81173	0.240221		-0.57741	0.079824	-0.05528	-0.79447	0.582509		-1.19426	-0.21994	0.785098	0.534411	-1.57205		-0.78508	0.500535	-1.05937	-1.48976	-0.26094
-1.78673	-0.33929	0.684671	-0.30585	-1.87794	0.207973		-0.52815	0.097752	-0.06624	-0.73315	0.52487		-1.20078	-0.10697	0.75739	0.469612	-1.60854		-0.77017	0.435268	-1.09716	-1.53773	-0.24556
-1.77853	-0.2666	0.652638	-0.35268	-1.93246	0.212551		-0.47899	0.140134	-0.05068	-0.63454	0.475726		-1.18635	0.102332	0.693465	0.350905	-1.66764		-0.7491	0.381856	-1.14995	-1.53124	-0.23327
-1.77032	-0.17621	0.670901	-0.42469	-1.94557	0.229361		-0.43254	0.198941	-0.03027	-0.58967	0.426184		-1.14524	0.363088	0.609153	0.25725	-1.71855		-0.73245	0.360982	-1.22034	-1.46054	-0.22688
-1.76212	-0.11793	0.709279	-0.50156	-1.88732	0.227943		-0.38286	0.255217	-0.03134	-0.63129	0.355148		-1.09609	0.608191	0.523641	0.258903	-1.74329		-0.72237	0.357457	-1.29136	-1.35916	-0.23219
-1.75392	-0.12001	0.716558	-0.57113	-1.76057	0.213287		-0.3282	0.294091	-0.07205	-0.69766	0.252837		-1.07742	0.784584	0.458626	0.31702	-1.74093		-0.72354	0.346809	-1.33939	-1.27416	-0.24934
-1.74571	-0.1688	0.666422	-0.62741	-1.62924	0.207549		-0.26504	0.310137	-0.13599	-0.70792	0.145788		-1.11534	0.871711	0.429965	0.358348	-1.72877		-0.73254	0.341885	-1.35154	-1.24296	-0.26819
-1.73751	-0.22475	0.583744	-0.66787	-1.57216	0.226751		-0.19951	0.306432	-0.19112	-0.62894	0.060672		-1.19833	0.883702	0.439997	0.342904	-1.71923		-0.73949	0.386893	-1.34393	-1.24884	-0.26373
-1.72931	-0.26315	0.518708	-0.69391	-1.60111	0.255282		-0.14357	0.284202	-0.22006	-0.50345	-0.00457		-1.27309	0.848919	0.479572	0.28531	-1.72333		-0.72155	0.523904	-1.33995	-1.24824	-0.2175
-1.72111	-0.27413	0.507214	-0.71505	-1.66503	0.263995		-0.1005	0.251578	-0.23325	-0.3908	-0.06441		-1.29892	0.800206	0.521838	0.237121	-1.74362		-0.67039	0.741736	-1.35809	-1.21742	-0.14628
-1.7129	-0.25926	0.537496	-0.74604	-1.70036	0.240672		-0.06904	0.211041	-0.25458	-0.32699	-0.12218		-1.28044	0.74048	0.547502	0.221414	-1.7757		-0.59577	0.992621	-1.40088	-1.17254	-0.08769
-1.7047	-0.21181	0.571447	-0.78162	-1.70429	0.196629		-0.0392	0.165245	-0.28958	-0.31409	-0.15977		-1.2497	0.646825	0.547184	0.240521	-1.80674		-0.52052	1.22233	-1.45361	-1.17498	-0.08295
-1.6965	-0.13418	0.590651	-0.80884	-1.7139	0.162393		-0.0057	0.119486	-0.32959	-0.34367	-0.1629		-1.24133	0.510868	0.525016	0.272766	-1.81067		-0.46493	1.38895	-1.50604	-1.25371	-0.14056
-1.68837	-0.04991	0.608811	-0.82272	-1.76441	0.161346		0.023907	0.078862	-0.36311	-0.43137	-0.13471		-1.25717	0.37219	0.495851	0.295095	-1.76889		-0.42645	1.47652	-1.5495	-1.38756	-0.23232
-1.68017	0.02477	0.642682	-0.82426	-1.86197	0.191481		0.049172	0.061131	-0.38473	-0.5545	-0.08884		-1.27707	0.281525	0.482679	0.296569	-1.68515		-0.40955	1.49378	-1.57918	-1.53818	-0.31948
-1.67197	0.078822	0.684197	-0.82927	-1.96024	0.219078		0.088831	0.064056	-0.39192	-0.65992	-0.05187		-1.26642	0.232688	0.511132	0.27726	-1.58318		-0.40894	1.47058	-1.59578	-1.65241	-0.36487
-1.66377	0.111557	0.711496	-0.85057	-2.00085	0.217514		0.150312	0.060424	-0.38494	-0.69489	-0.03923		-1.20671	0.193135	0.57778	0.248428	-1.48289		-0.40387	1.4291	-1.60746	-1.6887	-0.36157
-1.65556	0.13212	0.709549	-0.89066	-1.94953	0.183768		0.203214	0.021294	-0.36265	-0.64863	-0.05024		-1.11141	0.14459	0.658827	0.206433	-1.39729		-0.38116	1.3803	-1.62366	-1.62496	-0.31778
-1.64736	0.15821	0.690367	-0.92503	-1.82888	0.12658		0.213431	-0.05933	-0.31862	-0.55453	-0.04998		-1.0152	0.110938	0.724828	0.167162	-1.32834		-0.34758	1.3214	-1.64195	-1.4986	-0.25269
-1.63916	0.214054	0.673789	-0.91908	-1.69557	0.062971		0.174785	-0.15131	-0.25408	-0.44689	0.025932		-0.96127	0.103426	0.753856	0.174331	-1.26796		-0.31864	1.25256	-1.65457	-1.37936	-0.19536
-1.63095	0.309095	0.667371	-0.86371	-1.60982	0.00512		0.122897	-0.22867	-0.18281	-0.36357	0.220317		-0.96482	0.095534	0.749851	0.253909	-1.22287		-0.29439	1.17983	-1.65719	-1.32536	-0.16674
-1.62275	0.425031	0.666182	-0.78394	-1.6008	-0.02664		0.093721	-0.27545	-0.13278	-0.32392	0.508551		-1.00761	0.058039	0.723277	0.366778	-1.20869		-0.26718	1.09899	-1.66473	-1.34258	-0.17562
-1.61455	0.522177	0.650566	-0.7327	-1.64802	-0.02824		0.091182	-0.29149	-0.12072	-0.34003	0.814907		-1.06086	-0.00117	0.687028	0.447997	-1.24016		-0.23705	1.01878	-1.69676	-1.37053	-0.21392
-1.60634	0.570155	0.615332	-0.7436	-1.71045	-0.02057		0.103672	-0.28695	-0.13926	-0.4175	1.05035		-1.10902	-0.03339	0.645956	0.483571	-1.30796		-0.22507	0.948557	-1.75121	-1.35989	-0.26953
-1.59822	0.586198	0.559515	-0.79929	-1.71646	-0.02228		0.120611	-0.26788	-0.17328	-0.51827	1.1636		-1.14857	-0.02011	0.597768	0.501655	-1.38177		-0.24756	0.899555	-1.80203	-1.31855	-0.32744
-1.59002	0.615861	0.490716	-0.85161	-1.61948	-0.03019		0.139823	-0.237	-0.20706	-0.6017	1.14975		-1.18364	0.013352	0.5325	0.539417	-1.43853		-0.29808	0.873196	-1.82367	-1.28372	-0.37863
-1.58182	0.691833	0.42242	-0.86502	-1.45156	-0.00952		0.148052	-0.19626	-0.23487	-0.65057	1.0397		-1.22673	0.034087	0.439263	0.591862	-1.46109		-0.36012	0.870443	-1.81563	-1.2609	-0.42494
-1.57361	0.803111	0.353796	-0.84433	-1.32551	0.067205		0.13477	-0.16002	-0.24621	-0.6797	0.882239		-1.27187	0.029405	0.32864	0.63564	-1.45636		-0.41664	0.898268	-1.79115	-1.234	-0.4671
-1.56541	0.913078	0.285142	-0.81276	-1.35502	0.203282		0.107452	-0.14882	-0.2304	-0.71218	0.729008		-1.30606	0.016721	0.215902	0.673616	-1.44543		-0.46687	0.936107	-1.76792	-1.19513	-0.50557
-1.55721	0.995993	0.219603	-0.78483	-1.53561	0.38564		0.070424	-0.17719	-0.19541	-0.75534	0.611756		-1.31009	0.008691	0.121174	0.712198	-1.45393		-0.50861	0.959786	-1.7476	-1.15066	-0.53844
-1.549	1.06389	0.176061	-0.75482	-1.76819	0.584583		0.028076	-0.23574	-0.16441	-0.78454	0.538487		-1.27257	0.011725	0.049721	0.757581	-1.49605		-0.53014	0.956875	-1.72362	-1.11509	-0.57241
-1.5408	1.13062	0.175281	-0.71419	-1.9297	0.77201		-0.01801	-0.28977	-0.16577	-0.76484	0.486506		-1.21407	0.021484	0.004699	0.796746	-1.54992		-0.51775	0.946524	-1.70091	-1.06408	-0.61405
-1.5326	1.17586	0.217284	-0.67288	-1.96595	0.907239		-0.05183	-0.30985	-0.19671	-0.70271	0.426336		-1.16516	0.029339	-0.01185	0.831214	-1.57521		-0.46198	0.975847	-1.67701	-0.96725	-0.66356
-1.52439	1.17318	0.281481	-0.651	-1.91925	0.975857		-0.04437	-0.29041	-0.23232	-0.63903	0.346607		-1.14377	0.038018	-0.00565	0.8595	-1.54408		-0.37966	1.07109	-1.64668	-0.82242	-0.71069
-1.51619	1.12153	0.320997	-0.65199	-1.85295	0.997742		0.019055	-0.2562	-0.24783	-0.6357	0.254334		-1.13596	0.052736	0.010896	0.847408	-1.46699		-0.30253	1.21416	-1.59719	-0.66601	-0.74263
-1.50807	1.06366	0.300743	-0.64955	-1.8221	1.00556		0.124475	-0.22785	-0.2261	-0.71262	0.167104		-1.12935	0.075332	0.020577	0.787258	-1.37121		-0.26488	1.35517	-1.51244	-0.55653	-0.77081
-1.49987	1.04537	0.226926	-0.6325	-1.84326	1.01683		0.234864	-0.21337	-0.16684	-0.82719	0.084406		-1.13998	0.089087	0.017405	0.707692	-1.26156		-0.27474	1.45687	-1.38337	-0.50736	-0.81458
-1.49166	1.07675	0.139813	-0.6176	-1.89682	1.03204		0.322495	-0.21458	-0.07512	-0.89567	0.004193		-1.18788	0.082749	-0.00687	0.658576	-1.13463		-0.29121	1.50821	-1.21517	-0.48604	-0.88216
-1.48346	1.13836	0.077804	-0.63062	-1.92903	1.05547		0.382502	-0.21159	0.038664	-0.83172	-0.0743		-1.27546	0.057346	-0.06239	0.677005	-0.99476		-0.27155	1.52222	-1.04237	-0.44677	-0.96077
-1.47526	1.19887	0.054749	-0.67588	-1.90701	1.08592		0.429058	-0.18462	0.163061	-0.60986	-0.15498		-1.36968	0.025999	-0.14652	0.752528	-0.86299		-0.20559	1.51699	-0.89908	-0.3871	-1.02373
-1.46705	1.24084	0.059198	-0.71361	-1.84635	1.10739		0.470016	-0.12818	0.278506	-0.27024	-0.2285		-1.42895	-0.00111	-0.23795	0.841725	-0.75356		-0.12517	1.49967	-0.81175	-0.33747	-1.06405
-1.45885	1.24452	0.063181	-0.70536	-1.7689	1.09277		0.495918	-0.06901	0.363733	0.097928	-0.28858		-1.43668	-0.035	-0.30758	0.899842	-0.66695		-0.06611	1.47022	-0.78544	-0.30008	-1.09007
-1.45065	1.20448	0.050395	-0.65154	-1.6813	1.03801		0.508427	-0.04503	0.411664	0.397394	-0.33824		-1.40855	-0.08597	-0.34519	0.926522	-0.59103		-0.02798	1.43284	-0.80105	-0.26456	-1.1122
-1.44245	1.1406	0.010223	-0.5988	-1.57764	0.968919		0.526548	-0.07356	0.433285	0.591815	-0.39111		-1.37888	-0.14686	-0.36003	0.94809	-0.5204		0.021177	1.41067	-0.82893	-0.21202	-1.11831
-1.43424	1.07253	-0.05206	-0.58632	-1.47628	0.918615		0.572	-0.14235	0.453963	0.707633	-0.45926		-1.3708	-0.18844	-0.36436	1.0047	-0.46221		0.109386	1.41147	-0.837	-0.1473	-1.08305
-1.42604	1.02075	-0.10806	-0.60995	-1.41068	0.918317		0.625493	-0.21275	0.480564	0.815223	-0.53659		-1.38717	-0.19644	-0.36854	1.11815	-0.41568		0.218783	1.41486	-0.81137	-0.08446	-0.99959
-1.41792	0.990921	-0.12228	-0.65485	-1.39668	0.970244		0.632124	-0.26749	0.49881	0.927545	-0.61128		-1.40864	-0.18392	-0.37236	1.25266	-0.37636		0.300964	1.3928	-0.7661	-0.01744	-0.87515
-1.40971	0.975963	-0.08728	-0.70824	-1.42334	1.05623		0.549066	-0.31458	0.490569	0.976067	-0.6717		-1.41236	-0.15834	-0.37304	1.35095	-0.32686		0.317679	1.3334	-0.74264	0.055177	-0.72699
-1.40151	0.959537	-0.0453	-0.77243	-1.46163	1.1491		0.3919	-0.36059	0.454325	0.909056	-0.71959		-1.38501	-0.1274	-0.36461	1.38429	-0.24291		0.2757	1.26052	-0.77242	0.107523	-0.57767
-1.39331	0.934655	-0.02794	-0.84587	-1.50629	1.2121		0.240703	-0.40627	0.407796	0.756071	-0.75313		-1.33053	-0.10143	-0.34525	1.36977	-0.12489		0.214835	1.20402	-0.84685	0.081396	-0.45167
-1.3851	0.906129	-0.0281	-0.91794	-1.54716	1.22722		0.162276	-0.4491	0.364095	0.623881	-0.76435		-1.26715	-0.08886	-0.3247	1.32992	-0.00581		0.178447	1.16714	-0.9251	-0.05708	-0.36918
-1.3769	0.873641	-0.02285	-0.98301	-1.55433	1.2015		0.168472	-0.48527	0.33362	0.579985	-0.74838		-1.21308	-0.09326	-0.32274	1.27342	0.060858		0.18984	1.13165	-0.96707	-0.27608	-0.34287
-1.3687	0.825571	-0.00313	-1.04584	-1.51481	1.17115		0.218497	-0.49772	0.319725	0.596547	-0.71109		-1.18748	-0.10541	-0.35471	1.19664	0.056352		0.225152	1.0846	-0.97815	-0.48153	-0.37063
-1.3605	0.747794	-0.00098	-1.10876	-1.44851	1.16442		0.251745	-0.47444	0.319988	0.592397	-0.66972		-1.19189	-0.12301	-0.41382	1.10169	0.008195		0.246934	1.03426	-0.9891	-0.59222	-0.43019
-1.35229	0.651375	-0.04516	-1.1508	-1.40565	1.1886		0.230376	-0.4212	0.329407	0.536837	-0.64158		-1.20978	-0.1376	-0.47811	1.03223	-0.03396		0.238973	0.986647	-1.02623	-0.60751	-0.49793
-1.34409	0.560023	-0.12403	-1.14701	-1.39529	1.22812		0.148461	-0.36831	0.333406	0.479766	-0.64295		-1.21333	-0.14123	-0.52683	1.00945	-0.04135		0.219194	0.939189	-1.08531	-0.57686	-0.55864
-1.33589	0.490936	-0.18745	-1.08684	-1.39744	1.24955		0.044405	-0.35245	0.321073	0.474844	-0.66442		-1.16824	-0.1308	-0.55772	1.01957	-0.03326		0.216215	0.896135	-1.13535	-0.56731	-0.61276
-1.32777	0.433806	-0.19281	-0.98868	-1.38864	1.23333		-0.02765	-0.37437	0.282703	0.530737	-0.67913		-1.07108	-0.10388	-0.58385	1.02673	-0.03919		0.230014	0.860462	-1.16265	-0.59812	-0.66645
-1.31956	0.372331	-0.142	-0.88815	-1.35001	1.18353		-0.04043	-0.41411	0.217836	0.604751	-0.66528		-0.95039	-0.06583	-0.61452	1.01137	-0.06837		0.235689	0.835033	-1.17805	-0.64684	-0.72045
-1.31136	0.32343	-0.06018	-0.81554	-1.29898	1.11865		-0.02206	-0.4497	0.144191	0.654497	-0.62422		-0.8531	-0.01763	-0.64061	1.00697	-0.10389		0.201594	0.817275	-1.20154	-0.71038	-0.76865
-1.30316	0.310953	0.016269	-0.78034	-1.2733	1.05732		-0.02875	-0.48529	0.090869	0.662785	-0.59158		-0.81077	0.036778	-0.63923	1.04737	-0.12325		0.137693	0.80301	-1.23384	-0.78562	-0.79864
-1.29495	0.33338	0.051139	-0.76613	-1.29744	1.00728		-0.0814	-0.53081	0.076289	0.645854	-0.58909		-0.80886	0.072793	-0.61103	1.14073	-0.12365		0.086607	0.790315	-1.2627	-0.86146	-0.80668
-1.28675	0.355398	0.018195	-0.7605	-1.35208	0.963413		-0.15467	-0.57093	0.085527	0.628399	-0.60102		-0.81351	0.048951	-0.58373	1.25542	-0.11711		0.068364	0.778591	-1.28769	-0.91727	-0.7959
-1.27855	0.33416	-0.08863	-0.76629	-1.39503	0.914388		-0.21032	-0.58406	0.087198	0.608841	-0.58694		-0.79596	-0.05073	-0.57821	1.3287	-0.11739		0.081144	0.763283	-1.31122	-0.96848	-0.77267
-1.27034	0.266151	-0.24467	-0.79094	-1.40285	0.859731		-0.23687	-0.56274	0.067396	0.613371	-0.52719		-0.76846	-0.18315	-0.59374	1.30926	-0.12774		0.107915	0.73522	-1.33693	-1.03515	-0.74931
-1.26214	0.182456	-0.3943	-0.83605	-1.38671	0.79053		-0.23958	-0.53819	0.042658	0.681095	-0.44587		-0.76616	-0.27262	-0.6034	1.18877	-0.14625		0.127849	0.700431	-1.35867	-1.11078	-0.72734
-1.25394	0.135004	-0.47763	-0.88366	-1.38795	0.697972		-0.22262	-0.53947	0.037283	0.831083	-0.35746		-0.80369	-0.27432	-0.58387	1.02548	-0.16542		0.126399	0.677122	-1.3637	-1.18625	-0.7005
-1.24573	0.158554	-0.48214	-0.91598	-1.41882	0.579249		-0.19706	-0.56719	0.048181	1.02672	-0.25733		-0.85944	-0.2152	-0.51923	0.888142	-0.18842		0.098319	0.684192	-1.35168	-1.27163	-0.64646
-1.23761	0.241606	-0.44893	-0.92656	-1.46338	0.445757		-0.17956	-0.60583	0.046433	1.17325	-0.13477		-0.89371	-0.14602	-0.4023	0.812143	-0.22443		0.045138	0.714241	-1.33054	-1.39761	-0.55159
-1.22941	0.337193	-0.43272	-0.922	-1.51753	0.332335		-0.19517	-0.63356	0.005882	1.21813	-0.00358		-0.89318	-0.09695	-0.24026	0.778852	-0.26717		-0.02061	0.743716	-1.30403	-1.5677	-0.43597
-1.22121	0.383093	-0.45177	-0.91914	-1.59637	0.263061		-0.24673	-0.63969	-0.06167	1.1906	0.092291		-0.87758	-0.07295	-0.05872	0.747106	-0.29986		-0.06262	0.758629	-1.25839	-1.71997	-0.32382
-1.213	0.354931	-0.47306	-0.92457	-1.70578	0.244839		-0.31841	-0.62954	-0.12046	1.18153	0.113262		-0.86951	-0.07572	0.0886	0.6961	-0.29826		-0.04625	0.754397	-1.19346	-1.75771	-0.23231
-1.2048	0.275841	-0.47147	-0.93347	-1.81117	0.263001		-0.39228	-0.62282	-0.14491	1.24708	0.059188		-0.86746	-0.12278	0.168294	0.639885	-0.25798		0.03003	0.745769	-1.12967	-1.6366	-0.15344
-1.1966	0.189295	-0.45468	-0.92896	-1.87097	0.300762		-0.45435	-0.64388	-0.13914	1.35903	-0.02487		-0.85231	-0.21888	0.185411	0.611373	-0.2018		0.126866	0.738409	-1.097	-1.43093	-0.07877
-1.18839	0.123371	-0.46762	-0.89394	-1.85354	0.346454		-0.50647	-0.69858	-0.12797	1.45783	-0.09382		-0.81353	-0.34006	0.178436	0.61607	-0.15252		0.194178	0.733933	-1.11146	-1.25265	-0.02087
-1.18019	0.085012	-0.53427	-0.83429	-1.78777	0.369744		-0.5409	-0.76967	-0.11929	1.50581	-0.12361		-0.75651	-0.43097	0.182989	0.627222	-0.11384		0.212641	0.723028	-1.15545	-1.14931	0.000603
-1.17199	0.069865	-0.61805	-0.78305	-1.73301	0.350715		-0.54283	-0.82726	-0.11146	1.50236	-0.10371		-0.69858	-0.4382	0.197273	0.59776	-0.06318		0.199457	0.697309	-1.20732	-1.0874	-0.00426
-1.16378	0.065091	-0.66324	-0.77815	-1.72631	0.296316		-0.5044	-0.85932	-0.1027	1.44035	-0.03692		-0.64775	-0.34656	0.19272	0.505484	0.001045		0.189621	0.674805	-1.25664	-1.0096	0.00847
-1.15558	0.056525	-0.64326	-0.82615	-1.77607	0.238525		-0.42853	-0.87258	-0.10089	1.31835	0.066145		-0.6171	-0.17132	0.142416	0.396883	0.057723		0.196563	0.668322	-1.30525	-0.89908	0.067561
-1.14738	0.016717	-0.59831	-0.89806	-1.84875	0.201824		-0.3423	-0.87393	-0.11549	1.16067	0.178593		-0.61997	0.041293	0.052482	0.328101	0.088189		0.223617	0.675577	-1.34223	-0.79418	0.165252
-1.13926	-0.06248	-0.58846	-0.95467	-1.90431	0.176142		-0.28301	-0.86516	-0.12755	1.00842	0.273503		-0.64382	0.25106	-0.0448	0.326959	0.095928		0.277158	0.669458	-1.34294	-0.75348	0.266296
-1.13105	-0.14863	-0.63822	-0.97697	-1.89207	0.142575		-0.27071	-0.84883	-0.11363	0.895526	0.321574		-0.65346	0.443323	-0.11401	0.374138	0.121889		0.341824	0.624238	-1.29783	-0.77682	0.354254
-1.12285	-0.19603	-0.72394	-0.96896	-1.78136	0.097916		-0.28626	-0.84696	-0.06899	0.82263	0.319321		-0.60919	0.631421	-0.14227	0.449661	0.198299		0.383781	0.547042	-1.21819	-0.84827	0.426735
-1.11465	-0.18325	-0.79193	-0.93372	-1.61137	0.063727		-0.30028	-0.8737	-0.0194	0.786711	0.305851		-0.50933	0.818987	-0.14638	0.557073	0.310754		0.363117	0.471984	-1.14625	-0.96786	0.474187
-1.10644	-0.13504	-0.80858	-0.86914	-1.45559	0.061195		-0.31217	-0.91847	-0.00016	0.792608	0.333759		-0.38652	0.984089	-0.15321	0.682973	0.397885		0.28427	0.436693	-1.1247	-1.11128	0.484567
-1.09824	-0.08516	-0.77021	-0.77959	-1.36582	0.089806		-0.34174	-0.94135	-0.02116	0.849643	0.450123		-0.28216	1.1007	-0.1852	0.781527	0.408698		0.196443	0.450834	-1.15857	-1.23722	0.45226
-1.09004	-0.05234	-0.70242	-0.69219	-1.3184	0.133908		-0.40568	-0.91419	-0.06227	0.942122	0.664856		-0.22933	1.16356	-0.24023	0.808755	0.351755		0.143099	0.511229	-1.21651	-1.30984	0.400796
-1.08183	-0.02377	-0.6453	-0.62421	-1.25666	0.177547		-0.48628	-0.84898	-0.08669	1.02929	0.977347		-0.23537	1.18828	-0.29452	0.806543	0.2761		0.134438	0.605972	-1.25102	-1.34277	0.359322
-1.07363	0.02162	-0.63067	-0.5538	-1.16461	0.210848		-0.53351	-0.77362	-0.08037	1.1047	1.38359		-0.29944	1.19426	-0.32725	0.900496	0.226843		0.139002	0.719397	-1.24357	-1.36233	0.335278
-1.06543	0.074126	-0.66044	-0.43223	-1.09538	0.231813		-0.51315	-0.71438	-0.05726	1.16994	1.86037		-0.40385	1.19381	-0.33928	1.20405	0.207608		0.124955	0.832881	-1.20336	-1.37672	0.315812
-1.05723	0.110511	-0.70454	-0.22301	-1.11644	0.243362		-0.44415	-0.66548	-0.04722	1.22456	2.32208		-0.51994	1.18836	-0.35737	1.73714	0.195907		0.081618	0.932469	-1.15675	-1.37877	0.275341
-1.04911	0.11242	-0.73237	0.079828	-1.2247	0.236577		-0.37617	-0.60984	-0.07341	1.25878	2.65125		-0.62691	1.15359	-0.39929	2.39335	0.178222		0.019471	1.01527	-1.12984	-1.35932	0.205595
-1.0409	0.089707	-0.73596	0.468264	-1.38011	0.195198		-0.33845	-0.55144	-0.13029	1.26055	2.77784		-0.71502	1.06421	-0.4646	3.02232	0.162777		-0.03168	1.08281	-1.13597	-1.34052	0.108738
-1.0327	0.077029	-0.73523	0.928902	-1.54526	0.113421		-0.32581	-0.50456	-0.19378	1.2387	2.72216		-0.78516	0.910542	-0.5303	3.50747	0.155933		-0.04989	1.14713	-1.17094	-1.32811	0.003204
-1.0245	0.093429	-0.73802	1.42637	-1.70583	-0.00106		-0.30943	-0.47607	-0.22591	1.20083	2.56428		-0.83083	0.722983	-0.56316	3.80113	0.133782		-0.02244	1.21608	-1.20148	-1.28674	-0.08179
-1.01629	0.12897	-0.73434	1.91368	-1.85205	-0.11345		-0.28035	-0.44713	-0.20844	1.1758	2.38454		-0.84405	0.557954	-0.55324	3.92153	0.074692		0.039038	1.2915	-1.19873	-1.19366	-0.13404
-1.00809	0.154605	-0.72666	2.34776	-1.94947	-0.18671		-0.25674	-0.40092	-0.1468	1.18711	2.22112		-0.82531	0.438414	-0.51446	3.9231	-0.02619		0.10415	1.36801	-1.16626	-1.09953	-0.15805
-0.99989	0.153248	-0.72505	2.71581	-1.95732	-0.19228		-0.24987	-0.34163	-0.07232	1.23453	2.08291		-0.79029	0.352483	-0.47667	3.8809	-0.14141		0.142328	1.43299	-1.14609	-1.09143	-0.16915
-0.99168	0.123637	-0.74268	3.01597	-1.85245	-0.12194		-0.25644	-0.29081	-0.02211	1.29937	1.96197		-0.75881	0.273699	-0.46044	3.84951	-0.23231		0.14944	1.48601	-1.17423	-1.1823	-0.17666
-0.98348	0.078198	-0.76743	3.23554	-1.67539	-0.0044		-0.25988	-0.26818	-0.00878	1.33817	1.85652		-0.74641	0.204061	-0.46296	3.85547	-0.28337		0.142562	1.52792	-1.24731	-1.29714	-0.17712
-0.97528	0.036208	-0.7678	3.34683	-1.47575	0.116853		-0.262	-0.26704	-0.02926	1.31245	1.77121		-0.76702	0.156916	-0.47436	3.8697	-0.30272		0.138634	1.54961	-1.33666	-1.35065	-0.16179
-0.96707	0.019224	-0.73168	3.34214	-1.28272	0.208132		-0.28159	-0.2733	-0.07463	1.2102	1.72076		-0.81533	0.127312	-0.49284	3.84722	-0.3174		0.148768	1.53948	-1.4147	-1.33468	-0.12511
-0.95895	0.037949	-0.66764	3.24444	-1.10564	0.273099		-0.3314	-0.27771	-0.14395	1.06016	1.70992		-0.87575	0.10681	-0.52274	3.76871	-0.33476		0.166268	1.48819	-1.47154	-1.29891	-0.07523
-0.95075	0.076191	-0.58041	3.08891	-0.90872	0.3293		-0.39978	-0.28646	-0.23269	0.90732	1.71971		-0.92881	0.087964	-0.55315	3.64656	-0.33926		0.184186	1.40283	-1.49694	-1.27764	-0.02752
-0.94255	0.105341	-0.43835	2.90979	-0.66713	0.373561		-0.44169	-0.29693	-0.32144	0.79369	1.71771		-0.97335	0.06919	-0.56731	3.52736	-0.31144		0.196117	1.31039	-1.4869	-1.27285	-0.00102
-0.93434	0.103288	-0.21566	2.73193	-0.37942	0.393518		-0.4226	-0.30074	-0.39162	0.736406	1.6664		-1.02063	0.041752	-0.56552	3.44077	-0.25183		0.200285	1.23537	-1.45712	-1.26253	-0.00145
-0.92614	0.072314	0.060278	2.57212	-0.07142	0.378325		-0.34441	-0.29748	-0.43923	0.729438	1.54891		-1.06328	-0.00625	-0.56149	3.39309	-0.19273		0.207808	1.17952	-1.44193	-1.25433	-0.02768
-0.91794	0.031545	0.322733	2.42965	0.208776	0.340531		-0.23868	-0.29795	-0.47372	0.762432	1.37502		-1.08715	-0.06853	-0.56966	3.36937	-0.15947		0.224147	1.12005	-1.47373	-1.26922	-0.08
-0.90973	-0.01211	0.507104	2.29529	0.420234	0.31141		-0.13598	-0.31237	-0.50044	0.816744	1.17736		-1.08491	-0.13355	-0.58254	3.34922	-0.15041		0.248824	1.04524	-1.54367	-1.31052	-0.15356
-0.90153	-0.05082	0.596216	2.1654	0.532663	0.314471		-0.03997	-0.31952	-0.51188	0.857954	0.9992		-1.07774	-0.19606	-0.58869	3.31738	-0.1452		0.268886	0.960208	-1.614	-1.3735	-0.23877
-0.89333	-0.07947	0.615514	2.04329	0.564052	0.352742		0.056466	-0.28598	-0.50631	0.82326	0.856968		-1.09664	-0.26133	-0.57981	3.23291	-0.12451		0.283011	0.886015	-1.65635	-1.42672	-0.31419
-0.88512	-0.0921	0.594917	1.93442	0.570211	0.4105		0.158463	-0.20106	-0.49266	0.674282	0.740365		-1.13674	-0.31799	-0.55515	3.07931	-0.07754		0.316759	0.83471	-1.66342	-1.42996	-0.36658
-0.87692	-0.08382	0.552914	1.82609	0.614441	0.467755		0.253719	-0.09229	-0.49173	0.463977	0.64034		-1.16617	-0.34158	-0.51582	2.889	0.002602		0.382805	0.787417	-1.64874	-1.3494	-0.40186
-0.8688	-0.06294	0.499716	1.69579	0.72322	0.497618		0.331854	-0.00603	-0.51503	0.288139	0.565083		-1.15537	-0.32949	-0.4657	2.71815	0.104529		0.47371	0.718321	-1.62036	-1.20186	-0.43776
-0.8606	-0.03876	0.449048	1.54523	0.861557	0.484393		0.381463	0.037252	-0.55845	0.233482	0.533093		-1.11495	-0.30399	-0.42509	2.61222	0.207496		0.577078	0.628516	-1.579	-1.03679	-0.48406
-0.85239	-0.03242	0.408985	1.39336	0.972833	0.431094		0.395557	0.048149	-0.61072	0.299197	0.532252		-1.07225	-0.29048	-0.40591	2.56453	0.269607		0.688442	0.556607	-1.51899	-0.89139	-0.52317
-0.84419	-0.05355	0.38426	1.26443	1.01188	0.359521		0.37287	0.055566	-0.66005	0.400164	0.532643		-1.03881	-0.29097	-0.41104	2.53744	0.273901		0.817151	0.531502	-1.44614	-0.79991	-0.54229
-0.83599	-0.09289	0.369097	1.16778	0.970479	0.298271		0.326145	0.079919	-0.696	0.440851	0.512367		-1.0164	-0.30671	-0.43069	2.48776	0.245018		0.971548	0.553175	-1.37515	-0.78	-0.549
-0.82778	-0.13492	0.36637	1.10168	0.85497	0.267871		0.286532	0.118808	-0.71109	0.392127	0.473665		-1.00832	-0.34377	-0.45417	2.3921	0.221218		1.14821	0.587865	-1.31187	-0.85778	-0.56953
-0.81958	-0.1707	0.374436	1.06172	0.680072	0.280699		0.27158	0.174209	-0.71029	0.318744	0.430047		-1.03	-0.41486	-0.47936	2.23869	0.225975		1.3283	0.603655	-1.25101	-1.03673	-0.6304
-0.81138	-0.20795	0.371584	1.02473	0.469565	0.322508		0.290961	0.243424	-0.69744	0.281434	0.379246		-1.09175	-0.51297	-0.49159	2.04461	0.255043		1.49755	0.597919	-1.1837	-1.25381	-0.72109
-0.80317	-0.24804	0.331383	0.961333	0.254123	0.367644		0.345701	0.312471	-0.6796	0.286725	0.312616		-1.17626	-0.58993	-0.47694	1.86111	0.295938		1.63647	0.571282	-1.11318	-1.4367	-0.79744
-0.79497	-0.27417	0.232688	0.856907	0.075492	0.394035		0.416393	0.357727	-0.66718	0.297247	0.227738		-1.23182	-0.6076	-0.43211	1.71784	0.327272		1.71515	0.540223	-1.05243	-1.52531	-0.81858
-0.78677	-0.26503	0.095403	0.733879	-0.05482	0.391438		0.478245	0.364816	-0.66227	0.274324	0.133716		-1.20988	-0.56838	-0.37094	1.59623	0.329041		1.70454	0.519402	-1.01365	-1.50311	-0.79223
-0.77865	-0.21748	-0.02852	0.631952	-0.15532	0.373561		0.505121	0.347574	-0.65615	0.225766	0.0344		-1.11702	-0.52423	-0.311	1.44284	0.291479		1.59497	0.516986	-0.99258	-1.37209	-0.76602
-0.77044	-0.15234	-0.0904	0.567024	-0.27934	0.350317		0.487721	0.331274	-0.62183	0.172048	-0.06553		-1.01186	-0.52615	-0.25982	1.24834	0.20737		1.42139	0.526096	-0.96964	-1.16929	-0.78427
-0.76224	-0.09589	-0.07697	0.525668	-0.46216	0.321673		0.441204	0.324673	-0.54602	0.118449	-0.14798		-0.95942	-0.58129	-0.22372	1.04592	0.095842		1.2581	0.524822	-0.94144	-0.95532	-0.84219
-0.75404	-0.07523	-0.02724	0.477189	-0.674	0.272065		0.388562	0.304944	-0.446	0.059179	-0.19237		-0.97663	-0.66098	-0.20545	0.869856	-0.01384		1.18167	0.505414	-0.92145	-0.79034	-0.87636
-0.74583	-0.11398	0.012258	0.405133	-0.85461	0.194443		0.345201	0.25292	-0.35329	-0.01404	-0.19885		-1.02689	-0.72392	-0.21044	0.746559	-0.09428		1.19762	0.470671	-0.92227	-0.69286	-0.8145
-0.73763	-0.21777	0.00185	0.317008	-0.93761	0.108041		0.314447	0.181087	-0.28793	-0.11452	-0.20169		-1.06682	-0.7555	-0.23742	0.671987	-0.1238		1.24816	0.441262	-0.94812	-0.62912	-0.63933
-0.72943	-0.34564	-0.06672	0.23921	-0.92059	0.03114		0.318909	0.118866	-0.234	-0.24196	-0.2259		-1.08947	-0.75498	-0.28282	0.640051	-0.10399		1.2768	0.42324	-0.99258	-0.57356	-0.40617
-0.72123	-0.43308	-0.16581	0.194698	-0.86081	-0.03019		0.379651	0.081115	-0.16733	-0.36748	-0.26993		-1.12116	-0.71993	-0.33733	0.624856	-0.04892		1.26905	0.395811	-1.04919	-0.52821	-0.18869
-0.71302	-0.44188	-0.25848	0.186561	-0.83307	-0.08151		0.484909	0.057973	-0.0733	-0.46032	-0.32441		-1.16389	-0.66208	-0.38537	0.594478	0.013754		1.26315	0.348869	-1.09972	-0.51279	-0.03594
-0.70482	-0.37496	-0.32461	0.199382	-0.89606	-0.12135		0.590991	0.041432	0.041995	-0.48913	-0.38906		-1.19985	-0.61018	-0.4217	0.549036	0.057147		1.289	0.291833	-1.13331	-0.51829	0.035849
-0.69661	-0.25876	-0.36871	0.204681	-1.03658	-0.14055		0.655409	0.022381	0.156355	-0.44377	-0.4654		-1.21844	-0.59612	-0.4544	0.503807	0.067172		1.33781	0.252073	-1.14599	-0.50361	0.039027
-0.68849	-0.109	-0.40284	0.190112	-1.19705	-0.14024		0.670042	-0.00215	0.245023	-0.33971	-0.53639		-1.23069	-0.6214	-0.49757	0.472371	0.05457		1.37029	0.245874	-1.14957	-0.45929	-0.01742
-0.68029	0.0688	-0.4281	0.158141	-1.31021	-0.13581		0.649901	-0.03324	0.285936	-0.21645	-0.58149		-1.2618	-0.66191	-0.54314	0.435227	0.042371		1.35564	0.269501	-1.16967	-0.40609	-0.11764
-0.67209	0.269456	-0.44404	0.114127	-1.34496	-0.15004		0.615361	-0.07838	0.283793	-0.14009	-0.57984		-1.30702	-0.69724	-0.5679	0.381581	0.041073		1.31076	0.298883	-1.21585	-0.37181	-0.24516
-0.66389	0.504062	-0.46478	0.063353	-1.33047	-0.1867		0.575312	-0.13563	0.258162	-0.14524	-0.52898		-1.33854	-0.73226	-0.56498	0.32948	0.042769		1.27321	0.320635	-1.27554	-0.34915	-0.38692
-0.65568	0.787816	-0.51076	0.014468	-1.32161	-0.22832		0.529023	-0.19342	0.227901	-0.20765	-0.4633		-1.33098	-0.77461	-0.55022	0.300017	0.028371		1.26509	0.338729	-1.33197	-0.32158	-0.53085
-0.64748	1.13381	-0.58158	-0.01528	-1.34559	-0.24786		0.473997	-0.22471	0.194824	-0.24898	-0.41686		-1.28358	-0.80965	-0.54547	0.288258	-0.01243		1.26606	0.358441	-1.38346	-0.30049	-0.66356
-0.63928	1.52298	-0.66609	-0.03713	-1.38691	-0.22913		0.406813	-0.2108	0.145693	-0.2283	-0.40755		-1.21985	-0.8175	-0.54802	0.25423	-0.07695		1.23468	0.385242	-1.43581	-0.29959	-0.76015
-0.63107	1.91566	-0.74127	-0.08411	-1.43187	-0.17279		0.334147	-0.16475	0.072421	-0.19331	-0.42435		-1.16815	-0.78292	-0.54552	0.1932	-0.15367		1.16494	0.428778	-1.49122	-0.34318	-0.80517
-0.62287	2.28563	-0.78838	-0.18027	-1.47289	-0.08664		0.268645	-0.12627	-0.01656	-0.2001	-0.44771		-1.1457	-0.72109	-0.54661	0.160301	-0.23431		1.09212	0.505823	-1.54632	-0.43949	-0.80364
-0.61467	2.62422	-0.79495	-0.30971	-1.50867	0.002384		0.223979	-0.13957	-0.09975	-0.26222	-0.47637		-1.14082	-0.66883	-0.56843	0.191155	-0.32105		1.05043	0.619531	-1.59038	-0.57464	-0.7746
-0.60646	2.92748	-0.75165	-0.418	-1.54889	0.080483		0.190172	-0.20072	-0.16826	-0.32997	-0.52782		-1.13038	-0.65862	-0.61561	0.256453	-0.40956		1.02404	0.750463	-1.61297	-0.72034	-0.75346
-0.59826	3.15621	-0.67571	-0.46811	-1.602	0.142012		0.146863	-0.27689	-0.2185	-0.35172	-0.60552		-1.09827	-0.69873	-0.66628	0.313405	-0.5002		0.970027	0.869842	-1.6049	-0.8266	-0.76574
-0.59014	3.2856	-0.59035	-0.46868	-1.65752	0.185961		0.090831	-0.34833	-0.24511	-0.32136	-0.68284		-1.05587	-0.76074	-0.70125	0.350453	-0.59083		0.86828	0.955977	-1.56889	-0.84337	-0.81147
-0.58194	3.33675	-0.51717	-0.46226	-1.67452	0.217302		0.035591	-0.41239	-0.24963	-0.26269	-0.73129		-1.03236	-0.81102	-0.72651	0.364008	-0.67017		0.758734	1.0147	-1.52712	-0.77573	-0.8663
-0.57373	3.36039	-0.46227	-0.48583	-1.63393	0.2273		0.007728	-0.45741	-0.24108	-0.22348	-0.74491		-1.04976	-0.8354	-0.75097	0.367063	-0.73929		0.7006	1.05087	-1.50972	-0.71708	-0.90191
-0.56553	3.39256	-0.42795	-0.53773	-1.56097	0.209139		0.01623	-0.44918	-0.23501	-0.22927	-0.73202		-1.10261	-0.8477	-0.76429	0.357136	-0.8018		0.713677	1.05322	-1.5292	-0.76563	-0.91789
-0.55733	3.41802	-0.41882	-0.58357	-1.5082	0.160584		0.046548	-0.37609	-0.2424	-0.27127	-0.69664		-1.16798	-0.86771	-0.74645	0.335639	-0.86338		0.771889	1.02204	-1.56222	-0.93312	-0.93897
-0.54912	3.39624	-0.41777	-0.58836	-1.51882	0.096677		0.075198	-0.27211	-0.26549	-0.31075	-0.64239		-1.23625	-0.88	-0.70492	0.335603	-0.91499		0.820838	0.971945	-1.58546	-1.12707	-0.98547
-0.54092	3.31096	-0.40448	-0.55204	-1.5683	0.039973		0.087681	-0.19165	-0.29876	-0.31303	-0.59346		-1.30085	-0.86113	-0.66695	0.366338	-0.94443		0.828382	0.921412	-1.59467	-1.22569	-1.04287
-0.53272	3.18991	-0.37292	-0.50186	-1.6228	0.003842		0.09313	-0.14946	-0.32938	-0.26347	-0.57769		-1.35231	-0.80585	-0.6587	0.408345	-0.95135		0.801208	0.869083	-1.602	-1.18611	-1.0789
-0.52451	3.06734	-0.34266	-0.4707	-1.67318	0.007347		0.100009	-0.10991	-0.34958	-0.17078	-0.60813		-1.38505	-0.74024	-0.6807	0.423956	-0.94112		0.762909	0.799564	-1.61198	-1.05854	-1.06641
-0.51631	2.95149	-0.34348	-0.47382	-1.72114	0.058041		0.106601	-0.04344	-0.34867	-0.06738	-0.66594		-1.3917	-0.69374	-0.70939	0.400224	-0.92031		0.726189	0.720585	-1.59646	-0.93433	-1.01028
-0.50811	2.84485	-0.3782	-0.51224	-1.74133	0.154541		0.102555	0.031863	-0.32685	0.02326	-0.71234		-1.38223	-0.6565	-0.72403	0.340145	-0.88579		0.678153	0.658638	-1.52129	-0.8544	-0.94303
-0.49999	2.74202	-0.42946	-0.57924	-1.69069	0.273185		0.086941	0.068374	-0.30262	0.075563	-0.72714		-1.37257	-0.59802	-0.72181	0.255574	-0.84991		0.614089	0.634965	-1.37866	-0.81691	-0.89742
-0.49178	2.64816	-0.47584	-0.64849	-1.59146	0.374866		0.075425	0.044167	-0.29194	0.080343	-0.71369		-1.37286	-0.51065	-0.72027	0.175484	-0.83517		0.550456	0.638774	-1.2124	-0.81535	-0.89389
-0.48358	2.56485	-0.5107	-0.70099	-1.51887	0.434493		0.081861	-0.0248	-0.29942	0.049644	-0.70353		-1.37882	-0.43605	-0.73238	0.095431	-0.85522		0.520812	0.643686	-1.08466	-0.81119	-0.92939
-0.47538	2.48882	-0.53566	-0.73893	-1.53933	0.456551		0.106458	-0.11107	-0.32332	-0.00071	-0.72384		-1.37214	-0.41787	-0.75952	0.020966	-0.8982		0.555558	0.626806	-1.03523	-0.75844	-0.99071
-0.46717	2.40822	-0.55344	-0.78756	-1.64029	0.47228		0.135354	-0.1856	-0.36195	-0.0579	-0.78226		-1.35062	-0.44447	-0.78717	-0.01677	-0.93556		0.640215	0.587	-1.05131	-0.64406	-1.06269
-0.45897	2.3083	-0.57161	-0.86162	-1.74507	0.513089		0.162471	-0.24114	-0.41744	-0.12899	-0.86162		-1.31988	-0.46406	-0.79659	0.016293	-0.95354		0.730605	0.547438	-1.0816	-0.52483	-1.12795
-0.45077	2.20392	-0.60722	-0.93927	-1.78814	0.594396		0.207585	-0.27536	-0.4918	-0.19551	-0.92704		-1.28938	-0.44895	-0.79534	0.123312	-0.95568		0.782242	0.527112	-1.08366	-0.47759	-1.17583
-0.44256	2.12256	-0.67585	-0.99194	-1.75947	0.701305		0.31674	-0.2902	-0.5779	-0.23313	-0.96331		-1.26934	-0.42562	-0.80044	0.245004	-0.95332		0.777013	0.540368	-1.05316	-0.52339	-1.19632
-0.43436	2.081	-0.76834	-1.01113	-1.71597	0.810149		0.52712	-0.28957	-0.65954	-0.24875	-0.97937		-1.26512	-0.42838	-0.82181	0.299875	-0.95136		0.72166	0.577283	-1.01696	-0.6397	-1.19284
-0.42616	2.0639	-0.8612	-1.01463	-1.71371	0.910518		0.826799	-0.27536	-0.72376	-0.27155	-1.00734		-1.27873	-0.4657	-0.84147	0.257167	-0.96297		0.637894	0.617657	-1.01126	-0.76809	-1.16699
-0.41795	2.03192	-0.93179	-1.01051	-1.75732	0.990878		1.15657	-0.25634	-0.75593	-0.32769	-1.07586		-1.30276	-0.50885	-0.82867	0.182226	-1.01112		0.55001	0.639963	-1.04592	-0.88083	-1.11829
-0.40983	1.95808	-0.97552	-0.98309	-1.79326	1.04076		1.45242	-0.24449	-0.75326	-0.3733	-1.18165		-1.33567	-0.53157	-0.78124	0.149838	-1.09605		0.471021	0.636946	-1.10181	-0.98915	-1.05614
-0.40163	1.8458	-0.99806	-0.92881	-1.77381	1.04424		1.67166	-0.26605	-0.73371	-0.3535	-1.29247		-1.37543	-0.53786	-0.72609	0.174307	-1.19329		0.417451	0.618495	-1.14311	-1.09776	-0.99189
-0.39343	1.73571	-0.99168	-0.87137	-1.70935	1.00086		1.82759	-0.33642	-0.72502	-0.27386	-1.35719		-1.42114	-0.54068	-0.70432	0.218109	-1.26018		0.406235	0.579382	-1.14889	-1.19153	-0.94806
-0.38522	1.67464	-0.95612	-0.85192	-1.65563	0.924009		1.94704	-0.44293	-0.74658	-0.17847	-1.33726		-1.46471	-0.54584	-0.72462	0.229571	-1.27553		0.437195	0.525205	-1.13238	-1.24848	-0.9376
-0.37702	1.68201	-0.89892	-0.8859	-1.66261	0.824335		2.04096	-0.56438	-0.79102	-0.09326	-1.22975		-1.49608	-0.54986	-0.7571	0.186482	-1.2523		0.483603	0.466591	-1.12743	-1.25271	-0.95653
-0.36882	1.73141	-0.84017	-0.94411	-1.6964	0.702776		2.09519	-0.68188	-0.84784	0.009183	-1.07712		-1.5061	-0.55744	-0.76114	0.09096	-1.20846		0.51024	0.426217	-1.15788	-1.18965	-0.98887
-0.36062	1.76933	-0.80375	-0.98385	-1.70778	0.550738		2.10733	-0.7844	-0.9014	0.130529	-0.93885		-1.4787	-0.56934	-0.72336	-0.02511	-1.16297		0.504635	0.423946	-1.21534	-1.06774	-1.02584
-0.35241	1.76408	-0.7933	-0.9889	-1.70542	0.388204		2.10133	-0.85193	-0.93957	0.223816	-0.8519		-1.39641	-0.57657	-0.66759	-0.11602	-1.13177		0.473986	0.451547	-1.27836	-0.91066	-1.06916
-0.34421	1.72955	-0.79967	-0.98158	-1.7035	0.263942		2.10396	-0.86178	-0.94855	0.245693	-0.82138		-1.24691	-0.58228	-0.62375	-0.15972	-1.13945		0.452693	0.493881	-1.32274	-0.75733	-1.11239
-0.33601	1.70673	-0.80418	-0.98905	-1.68263	0.206614		2.11456	-0.81241	-0.91808	0.225635	-0.82819		-1.05347	-0.58387	-0.60725	-0.16108	-1.19112		0.475402	0.528855	-1.34169	-0.66903	-1.14029
-0.3278	1.71052	-0.79623	-1.01673	-1.59614	0.197557		2.09797	-0.73956	-0.86513	0.240985	-0.86327		-0.86919	-0.57927	-0.61205	-0.15089	-1.25562		0.553081	0.55631	-1.34538	-0.66631	-1.13494
-0.31968	1.72349	-0.77196	-1.04603	-1.45834	0.180767		2.03625	-0.69049	-0.81321	0.31935	-0.91735		-0.73237	-0.57188	-0.62622	-0.1163	-1.29198		0.661834	0.585878	-1.3447	-0.71022	-1.10161
-0.31148	1.72553	-0.74192	-1.06045	-1.35113	0.123294		1.95656	-0.67771	-0.77923	0.414016	-0.97215		-0.64838	-0.57092	-0.64354	-0.02743	-1.26926		0.762244	0.619657	-1.35613	-0.73213	-1.06143
-0.30327	1.7155	-0.73579	-1.06298	-1.35654	0.041424		1.90527	-0.6825	-0.76507	0.461385	-1.00126		-0.59134	-0.58505	-0.6612	0.10713	-1.18342		0.841374	0.648122	-1.38526	-0.70969	-1.03561
-0.29507	1.72119	-0.76867	-1.06334	-1.46286	-0.01804		1.90425	-0.67189	-0.76921	0.464916	-0.98978		-0.54882	-0.60954	-0.67681	0.234303	-1.06199		0.913152	0.660064	-1.43158	-0.65995	-1.03063
-0.28687	1.75747	-0.83903	-1.0597	-1.55959	-0.02214		1.92287	-0.63159	-0.79276	0.464167	-0.95925		-0.52539	-0.624	-0.67934	0.300184	-0.93795		0.987534	0.667484	-1.48866	-0.59674	-1.03309
-0.27866	1.81814	-0.93035	-1.01953	-1.57043	0.022162		1.91203	-0.56299	-0.82688	0.480491	-0.9244		-0.52113	-0.60727	-0.65863	0.328362	-0.82074		1.0389	0.689321	-1.53878	-0.52049	-1.03903
-0.27046	1.88322	-1.01292	-0.90872	-1.50312	0.081597		1.84779	-0.48311	-0.86212	0.502012	-0.8823		-0.53299	-0.56734	-0.61589	0.368062	-0.6893		1.02844	0.723635	-1.5691	-0.41426	-1.04497
-0.26226	1.93688	-1.05556	-0.70801	-1.40873	0.1223		1.73903	-0.42582	-0.89298	0.481419	-0.8244		-0.54842	-0.53321	-0.56412	0.418724	-0.52542		0.977323	0.729325	-1.57525	-0.30295	-1.03202
-0.25406	1.97587	-1.05248	-0.41798	-1.32369	0.130801		1.61018	-0.41384	-0.92384	0.398868	-0.75229		-0.56139	-0.52553	-0.51739	0.44789	-0.33843		0.942598	0.676521	-1.56877	-0.21353	-0.97227
-0.24585	1.98911	-1.02992	-0.06502	-1.23978	0.089826		1.48971	-0.44776	-0.95631	0.264907	-0.68		-0.56917	-0.53794	-0.46541	0.4438	-0.17182		0.943447	0.581092	-1.56098	-0.155	-0.8478
-0.23765	1.96773	-1.01329	0.318684	-1.12625	-0.00412		1.39592	-0.49599	-0.98476	0.11757	-0.61767		-0.57305	-0.54019	-0.38532	0.430911	-0.05944		0.930851	0.484573	-1.55895	-0.14411	-0.6863
-0.22953	1.91278	-1.02408	0.683055	-0.97718	-0.12976		1.30947	-0.52499	-1.00546	-0.01118	-0.56732		-0.57785	-0.51312	-0.26162	0.409962	-0.00083		0.846724	0.420745	-1.56769	-0.21485	-0.53487
-0.22133	1.84224	-1.06375	0.993353	-0.84801	-0.25295		1.20929	-0.53994	-1.01707	-0.10875	-0.51474		-0.58322	-0.46384	-0.11373	0.35987	0.021109		0.693	0.385124	-1.58621	-0.39519	-0.42398
-0.21312	1.78811	-1.1227	1.22009	-0.82071	-0.3375		1.0875	-0.57057	-1.02351	-0.14534	-0.43873		-0.58327	-0.42415	0.014649	0.275441	0.01382		0.542148	0.361141	-1.61218	-0.62771	-0.33385
-0.20492	1.76504	-1.17975	1.36008	-0.92607	-0.37042		0.971221	-0.64078	-1.02144	-0.12328	-0.32017		-0.57129	-0.42868	0.094622	0.214281	-0.03023		0.463407	0.341178	-1.62991	-0.78929	-0.20545
-0.19672	1.77679	-1.20606	1.43276	-1.11187	-0.36103		0.899341	-0.72709	-1.01548	-0.07878	-0.14199		-0.55383	-0.47918	0.127036	0.261399	-0.1011		0.459225	0.327131	-1.63071	-0.81164	-0.00081
-0.18851	1.81605	-1.19582	1.45118	-1.27969	-0.33589		0.886254	-0.77837	-1.01954	-0.07188	0.079231		-0.55273	-0.55215	0.13634	0.435287	-0.17689		0.48654	0.322331	-1.6159	-0.74447	0.264109
-0.18031	1.86534	-1.15506	1.42259	-1.38285	-0.30914		0.916092	-0.7646	-1.04669	-0.14321	0.309926		-0.581	-0.61137	0.152026	0.677468	-0.23453		0.498266	0.323605	-1.59282	-0.70077	0.528654
-0.17211	1.89949	-1.09827	1.3488	-1.429	-0.27458		0.94869	-0.70226	-1.09024	-0.26497	0.528057		-0.62291	-0.65092	0.183586	0.892173	-0.26614		0.468601	0.333679	-1.56416	-0.7349	0.736947
-0.1639	1.90121	-1.02497	1.23381	-1.44659	-0.23419		0.952847	-0.63925	-1.11769	-0.37736	0.726722		-0.64148	-0.68481	0.223194	1.02818	-0.28401		0.39947	0.347331	-1.52846	-0.81879	0.869907
-0.1557	1.88355	-0.92799	1.08793	-1.44116	-0.19077		0.909396	-0.60549	-1.11234	-0.43735	0.900752		-0.62014	-0.72171	0.255636	1.08899	-0.29802		0.304162	0.343132	-1.49157	-0.89938	0.94345
-0.1475	1.87749	-0.82856	0.928869	-1.42368	-0.14992		0.821655	-0.604	-1.08132	-0.44603	1.06125		-0.57656	-0.7545	0.270813	1.13762	-0.32362		0.207461	0.306376	-1.4602	-0.96774	0.985985
-0.13938	1.91395	-0.75595	0.784714	-1.44816	-0.11508		0.722457	-0.61859	-1.04747	-0.39833	1.24874		-0.55607	-0.75515	0.262386	1.234	-0.35841		0.139094	0.238778	-1.44408	-1.03371	1.01105
-0.13117	1.98262	-0.72751	0.668667	-1.53557	-0.08666		0.654123	-0.63263	-1.03286	-0.27388	1.52188		-0.58415	-0.724	0.235287	1.36021	-0.38065		0.127531	0.16642	-1.44533	-1.08102	1.01576
-0.12297	2.04381	-0.72299	0.583407	-1.64867	-0.07847		0.641711	-0.64752	-1.03651	-0.09202	1.92341		-0.64283	-0.69242	0.203272	1.45545	-0.37087		0.169339	0.126805	-1.46499	-1.08623	0.977454
-0.11477	2.05382	-0.71179	0.50894	-1.72216	-0.10633		0.677492	-0.67154	-1.04563	0.066051	2.4221		-0.70525	-0.69254	0.184446	1.45242	-0.329		0.213214	0.142055	-1.50533	-1.03344	0.885139
-0.10656	1.99268	-0.688	0.429981	-1.73955	-0.17783		0.746066	-0.69891	-1.04699	0.101887	2.917		-0.75846	-0.72337	0.197054	1.34926	-0.28269		0.212874	0.203956	-1.54739	-0.9361	0.756938
-0.09836	1.87283	-0.66074	0.352364	-1.74516	-0.27292		0.836048	-0.69821	-1.03769	0.018231	3.30694		-0.81432	-0.74685	0.243664	1.19855	-0.26058		0.160543	0.268438	-1.56088	-0.81678	0.634299
-0.09016	1.71392	-0.64607	0.289026	-1.75874	-0.35315		0.924412	-0.6559	-1.02611	-0.10077	3.52943		-0.86715	-0.74194	0.314186	1.04236	-0.27008		0.104383	0.296949	-1.52447	-0.70611	0.559882
-0.08195	1.54451	-0.64657	0.240656	-1.75953	-0.38644		0.977963	-0.58344	-1.02141	-0.1723	3.58818		-0.88961	-0.72469	0.384707	0.890425	-0.28781		0.095651	0.288301	-1.44795	-0.6449	0.540399
-0.07375	1.39553	-0.66141	0.187525	-1.72585	-0.36751		0.970332	-0.51178	-1.03211	-0.17235	3.53278		-0.88211	-0.73011	0.439915	0.728832	-0.27757		0.128345	0.26653	-1.37104	-0.64454	0.553193
-0.06555	1.29782	-0.68627	0.119464	-1.68936	-0.31262		0.910039	-0.46292	-1.05418	-0.13215	3.43952		-0.87584	-0.75727	0.473808	0.563149	-0.21703		0.157238	0.254258	-1.33009	-0.69339	0.561952
-0.05735	1.26029	-0.71055	0.047047	-1.69931	-0.24248		0.839367	-0.42792	-1.08162	-0.08686	3.36657		-0.90228	-0.76549	0.48835	0.405574	-0.11644		0.150459	0.241267	-1.34571	-0.75547	0.544248
-0.04914	1.25333	-0.71416	-0.0078	-1.74943	-0.17292		0.795123	-0.39948	-1.11351	-0.08803	3.33259		-0.94094	-0.71773	0.496843	0.259295	-0.03069		0.124269	0.200945	-1.4125	-0.80847	0.498143
-0.04102	1.23072	-0.686	-0.03346	-1.77968	-0.10941		0.774962	-0.38106	-1.15176	-0.19149	3.32605		-0.94663	-0.62268	0.504437	0.127105	-0.01494		0.098609	0.124937	-1.50716	-0.86467	0.425825
-0.03282	1.16234	-0.64041	-0.03992	-1.73361	-0.05579		0.757055	-0.3823	-1.19387	-0.43037	3.31591		-0.90921	-0.54438	0.512913	0.009314	-0.07882		0.0637	0.044942	-1.59586	-0.93505	0.33487
-0.02461	1.06326	-0.59206	-0.04556	-1.61244	-0.00566		0.736927	-0.3976	-1.231	-0.75062	3.27951		-0.85813	-0.53999	0.515115	-0.08554	-0.18746		-0.00109	-0.01017	-1.6426	-1.01352	0.22691
-0.01641	0.973391	-0.55056	-0.07205	-1.46159	0.070869		0.724827	-0.403	-1.26244	-0.99659	3.2048		-0.82811	-0.61886	0.514392	-0.1704	-0.29554		-0.09711	-0.03785	-1.63268	-1.06644	0.105006
-0.00821	0.910708	-0.52041	-0.13913	-1.34194	0.209927		0.739694	-0.39103	-1.28638	-1.06108	3.09054		-0.81857	-0.73926	0.528616	-0.27132	-0.38597		-0.19439	-0.05179	-1.58124	-1.07902	-0.01677
0	0.872738	-0.51055	-0.24987	-1.2811	0.429557		0.777982	-0.37586	-1.30114	-0.9453	2.94815		-0.81568	-0.84935	0.569715	-0.39978	-0.45743		-0.26533	-0.05919	-1.52877	-1.06663	-0.12717
0.0082	0.844868	-0.5391	-0.39124	-1.26337	0.69462		0.806398	-0.39707	-1.30384	-0.74562	2.78584		-0.82075	-0.92362	0.641041	-0.53257	-0.50643		-0.30516	-0.04978	-1.51504	-1.0518	-0.22181
0.0164	0.816368	-0.60305	-0.53393	-1.26391	0.955376		0.785659	-0.47737	-1.29519	-0.56643	2.61231		-0.8477	-0.9615	0.728329	-0.62655	-0.50871		-0.32608	-0.02166	-1.5576	-1.04158	-0.3029
0.0246	0.778353	-0.68155	-0.65564	-1.27208	1.17848		0.69586	-0.58834	-1.27891	-0.42787	2.44536		-0.8989	-0.9797	0.820416	-0.66015	-0.45766		-0.33509	0.027112	-1.63555	-1.00101	-0.36638
0.03281	0.729328	-0.74344	-0.74542	-1.3154	1.36692		0.567746	-0.67193	-1.25688	-0.2812	2.32454		-0.95967	-0.98126	0.921495	-0.62895	-0.38236		-0.33452	0.092043	-1.70076	-0.88404	-0.40564
0.04101	0.682253	-0.77187	-0.79649	-1.40863	1.54504		0.457902	-0.67862	-1.23608	-0.06587	2.29561		-1.01525	-0.96807	1.04228	-0.56259	-0.31856		-0.3264	0.168539	-1.71843	-0.67422	-0.41808
0.04913	0.662664	-0.77141	-0.80115	-1.52708	1.71363		0.405553	-0.60176	-1.211	0.203925	2.3645		-1.0466	-0.94566	1.18218	-0.49581	-0.29708		-0.30069	0.251954	-1.68548	-0.41035	-0.40995
0.05733	0.691307	-0.74483	-0.74599	-1.61461	1.86044		0.404487	-0.44967	-1.17196	0.439282	2.48823		-1.04192	-0.91341	1.31266	-0.44744	-0.3193		-0.25978	0.320655	-1.63056	-0.14513	-0.39394
0.06554	0.759842	-0.7068	-0.63123	-1.6051	1.9844		0.40665	-0.22888	-1.10148	0.549047	2.60805		-1.00528	-0.8797	1.39558	-0.41555	-0.36474		-0.22234	0.365623	-1.57273	0.084497	-0.37657
0.07374	0.843244	-0.66905	-0.47595	-1.49246	2.09713		0.376767	0.05491	-0.9842	0.53497	2.6991		-0.95628	-0.85747	1.40716	-0.36562	-0.40551		-0.22089	0.382886	-1.51541	0.260518	-0.35799
0.08195	0.915442	-0.64291	-0.31129	-1.29896	2.21705		0.311687	0.375793	-0.83033	0.473143	2.76383		-0.91105	-0.86109	1.35441	-0.27757	-0.41931		-0.26802	0.387335	-1.46364	0.384951	-0.33601
0.09015	0.967896	-0.63494	-0.1636	-1.05145	2.34816		0.241171	0.677552	-0.66178	0.427154	2.8099		-0.8567	-0.90042	1.26954	-0.15713	-0.41227		-0.33743	0.398736	-1.42976	0.465491	-0.30651
0.09835	1.00044	-0.63598	-0.04626	-0.7888	2.48236		0.194758	0.907121	-0.49462	0.38831	2.81536		-0.78214	-0.96464	1.19111	-0.01957	-0.40609		-0.39984	0.431973	-1.42818	0.529413	-0.24078
0.10655	1.00155	-0.62527	0.044631	-0.55293	2.60759		0.178338	1.03639	-0.32326	0.293204	2.74203		-0.6968	-1.02211	1.14634	0.148554	-0.42041		-0.434	0.495228	-1.44331	0.585341	-0.08175
0.11476	0.972572	-0.57249	0.127644	-0.3764	2.70556		0.182514	1.0793	-0.13542	0.142883	2.583		-0.6372	-1.03372	1.12938	0.386265	-0.44216		-0.44607	0.587099	-1.45127	0.625893	0.230887
0.12296	0.934986	-0.4642	0.212806	-0.24433	2.77397		0.188029	1.07744	0.056252	0.018921	2.35658		-0.62485	-0.99226	1.10532	0.673699	-0.43788		-0.45205	0.696734	-1.44142	0.649321	0.735536
0.13116	0.925211	-0.31799	0.301869	-0.12431	2.82725		0.17561	1.09259	0.206571	-0.00486	2.10797		-0.64339	-0.93044	1.03028	0.963594	-0.39599		-0.46517	0.801815	-1.41898	0.641867	1.39654
0.13928	0.964804	-0.16807	0.390301	-0.00044	2.88704		0.128151	1.17855	0.253264	0.063091	1.87829		-0.67383	-0.88627	0.895425	1.22915	-0.33941		-0.5007	0.891508	-1.40088	0.600317	2.10243
0.14749	1.04102	-0.04299	0.46536	0.118045	2.95727		0.051056	1.33935	0.168661	0.129126	1.69147		-0.70727	-0.86283	0.739523	1.50698	-0.30348		-0.55282	0.961786	-1.38913	0.516699	2.74236
0.15569	1.12848	0.05728	0.523789	0.212021	3.02535		-0.03909	1.53558	-0.0285	0.115572	1.5536		-0.74939	-0.82954	0.615229	1.8677	-0.29284		-0.60225	1.00791	-1.383	0.391922	3.21473
0.16389	1.19746	0.155487	0.559764	0.314202	3.07206		-0.12248	1.69566	-0.26992	0.009444	1.44909		-0.79648	-0.77658	0.55474	2.30206	-0.29273		-0.6239	1.02171	-1.37766	0.267316	3.49924
0.1721	1.23654	0.277783	0.577637	0.466247	3.09386		-0.18708	1.75754	-0.48076	-0.12115	1.3762		-0.83105	-0.72807	0.544209	2.70859	-0.29136		-0.6063	0.996093	-1.37385	0.194276	3.63764
0.1803	1.2485	0.42137	0.578355	0.646924	3.09654		-0.23536	1.70775	-0.61887	-0.17957	1.33376		-0.84698	-0.71929	0.549508	2.97795	-0.29422		-0.55928	0.947817	-1.37421	0.194149	3.69986
0.1885	1.24772	0.563716	0.567665	0.764192	3.0852		-0.26244	1.5815	-0.68206	-0.13498	1.30377		-0.85139	-0.74691	0.543152	3.07761	-0.31173		-0.49707	0.911523	-1.37411	0.217233	3.72278
0.19671	1.25358	0.683351	0.555529	0.764097	3.0764		-0.26362	1.45134	-0.68896	-0.0225	1.25434		-0.85321	-0.76921	0.515082	3.05635	-0.34313		-0.43278	0.92971	-1.3599	0.201695	3.69377
0.20491	1.26226	0.784861	0.54685	0.692485	3.0924		-0.24847	1.37824	-0.65182	0.076598	1.15923		-0.84803	-0.74879	0.473233	2.98657	-0.38251		-0.37952	1.03254	-1.31096	0.122395	3.59922
0.21311	1.24992	0.897734	0.550614	0.64967	3.1579		-0.24436	1.38372	-0.57285	0.096846	1.02134		-0.83282	-0.67706	0.425138	2.91699	-0.40999		-0.3531	1.21201	-1.21472	0.000753	3.45492
0.22132	1.19659	1.03386	0.568542	0.689227	3.27297		-0.2653	1.43367	-0.44435	0.022155	0.872499		-0.80531	-0.5724	0.380801	2.8359	-0.41077		-0.3527	1.42251	-1.07742	-0.09211	3.31246
0.22944	1.1101	1.18002	0.606183	0.756975	3.40793		-0.29105	1.47352	-0.26236	-0.12618	0.741485		-0.76439	-0.4394	0.346419	2.70166	-0.38387		-0.35249	1.59545	-0.92853	-0.10323	3.21482
0.23764	1.01917	1.30926	0.669062	0.77368	3.53455		-0.30171	1.46406	-0.04731	-0.3022	0.632296		-0.71351	-0.28107	0.318942	2.48023	-0.34584		-0.32045	1.69099	-0.7964	-0.03423	3.1474
0.24584	0.945125	1.41028	0.757933	0.702972	3.6326		-0.30097	1.39397	0.182802	-0.46322	0.539003		-0.65873	-0.09988	0.294987	2.18785	-0.32918		-0.2377	1.72112	-0.68534	0.049825	3.06027
0.25405	0.89534	1.49161	0.864238	0.575585	3.69593		-0.32123	1.27957	0.405714	-0.57557	0.464177		-0.61996	0.090735	0.26654	1.86518	-0.34868		-0.1242	1.72454	-0.59636	0.074792	2.92261
0.26225	0.872368	1.55834	0.968916	0.448199	3.7053		-0.38502	1.14316	0.608917	-0.61821	0.409566		-0.59976	0.275187	0.229725	1.55948	-0.3966		-0.0172	1.73951	-0.52112	0.02224	2.76432
0.27045	0.886644	1.62149	1.05817	0.327578	3.63766		-0.46601	1.00151	0.779498	-0.61097	0.377974		-0.58456	0.466071	0.184249	1.29638	-0.44534		0.051882	1.77663	-0.45033	-0.05544	2.63855
0.27866	0.942864	1.6831	1.11911	0.192974	3.49811		-0.52403	0.875088	0.894768	-0.59467	0.372242		-0.55621	0.694619	0.133217	1.08468	-0.47071		0.091596	1.82818	-0.38061	-0.09208	2.57482
0.28686	1.02835	1.73777	1.14275	0.022095	3.32442		-0.54314	0.794021	0.94363	-0.59106	0.399594		-0.51676	0.981361	0.074733	0.930945	-0.47933		0.153495	1.89369	-0.31954	-0.07886	2.55218
0.29506	1.10512	1.76987	1.11953	-0.17535	3.16289		-0.54854	0.771601	0.932951	-0.58614	0.454781		-0.48732	1.29855	0.009592	0.831036	-0.49423		0.292054	1.97429	-0.28053	-0.03184	2.53068
0.30327	1.13889	1.76455	1.05405	-0.36885	3.04114		-0.56617	0.780587	0.88633	-0.56721	0.518185		-0.46876	1.57573	-0.05025	0.763169	-0.54286		0.53021	2.07959	-0.26127	0.022045	2.48631
0.31147	1.12478	1.72383	0.971749	-0.53204	2.93685		-0.59288	0.784146	0.825369	-0.53779	0.565275		-0.44926	1.76262	-0.09038	0.711116	-0.63148		0.827518	2.20826	-0.24935	0.071864	2.4263
0.31959	1.07406	1.66951	0.909988	-0.63089	2.80766		-0.60655	0.754031	0.765811	-0.52843	0.57807		-0.41877	1.85959	-0.10259	0.656733	-0.73582		1.11297	2.34766	-0.23081	0.103699	2.37769
0.32779	1.0105	1.62998	0.893233	-0.65619	2.63766		-0.59811	0.685305	0.734312	-0.56318	0.565129		-0.39108	1.92043	-0.09726	0.579164	-0.81649		1.3403	2.4839	-0.21169	0.075367	2.34683
0.336	0.948086	1.62424	0.912591	-0.6084	2.45559		-0.59184	0.59809	0.756985	-0.64195	0.527938		-0.39718	1.99418	-0.08576	0.434645	-0.84713		1.48647	2.62299	-0.21175	-0.02583	2.31546
0.3442	0.886631	1.67625	0.938611	-0.52826	2.30081		-0.62377	0.510481	0.841933	-0.75269	0.456782		-0.44374	2.08364	-0.07256	0.225255	-0.83091		1.56244	2.79137	-0.24122	-0.19223	2.25032
0.3524	0.835184	1.82799	0.949838	-0.48145	2.18709		-0.70237	0.437262	0.968445	-0.84859	0.351079		-0.51311	2.14906	-0.05658	0.017672	-0.78256		1.58449	2.99748	-0.29827	-0.39927	2.12735
0.36061	0.807561	2.1271	0.942211	-0.49422	2.08928		-0.79271	0.383101	1.09949	-0.89993	0.227102		-0.57292	2.15171	-0.04144	-0.12886	-0.72803		1.58066	3.21357	-0.36999	-0.60965	1.96516
0.36881	0.811386	2.59626	0.932053	-0.52823	1.98629		-0.85285	0.364626	1.21133	-0.90146	0.124665		-0.59917	2.0901	-0.04448	-0.20629	-0.69631		1.58382	3.38498	-0.43767	-0.76999	1.80461
0.37701	0.821765	3.19583	0.933899	-0.52915	1.88712		-0.86586	0.392874	1.30761	-0.87696	0.069763		-0.59043	1.98869	-0.0691	-0.27038	-0.70519		1.60953	3.49123	-0.48903	-0.81699	1.67446
0.38522	0.80997	3.8285	0.94735	-0.49721	1.8081		-0.84404	0.457903	1.40831	-0.85154	0.057061		-0.56809	1.87896	-0.10696	-0.37466	-0.74884		1.63869	3.53702	-0.5268	-0.75105	1.56278
0.39342	0.771838	4.40591	0.947904	-0.47616	1.75046		-0.8176	0.541857	1.52195	-0.81145	0.055696		-0.56472	1.76572	-0.15115	-0.53198	-0.8053		1.63997	3.53674	-0.57244	-0.63577	1.44829
0.40162	0.723398	4.85081	0.911725	-0.50917	1.6825		-0.80089	0.611189	1.64619	-0.75555	0.049136		-0.59658	1.63765	-0.19839	-0.70906	-0.85645		1.61745	3.4905	-0.63972	-0.56194	1.33648
0.40974	0.682395	5.14064	0.847477	-0.58389	1.58333		-0.7929	0.638299	1.77958	-0.70858	0.047288		-0.65892	1.49672	-0.26053	-0.86251	-0.89335		1.60736	3.39295	-0.71835	-0.57077	1.25116
0.41794	0.637106	5.28937	0.786007	-0.64435	1.45175		-0.79298	0.611773	1.93497	-0.71264	0.064648		-0.73281	1.36226	-0.34199	-0.96142	-0.93023		1.64488	3.27089	-0.77416	-0.62701	1.21231
0.42615	0.572701	5.34882	0.759549	-0.65202	1.30361		-0.79342	0.550836	2.13015	-0.76525	0.103489		-0.80795	1.25657	-0.43594	-0.98776	-0.97324		1.72408	3.15415	-0.78232	-0.68513	1.20694
0.43435	0.507251	5.37236	0.762102	-0.602	1.149		-0.78338	0.488076	2.38022	-0.81651	0.146034		-0.8757	1.19164	-0.52295	-0.96008	-1.01021		1.81582	3.06109	-0.7535	-0.72854	1.20472
0.44255	0.482505	5.39529	0.745511	-0.50939	0.983476		-0.75417	0.443221	2.67676	-0.84931	0.176029		-0.92536	1.16976	-0.58665	-0.9182	-1.02997		1.88948	2.97058	-0.72064	-0.76113	1.18867
0.45076	0.518527	5.41181	0.674475	-0.37462	0.820757		-0.72654	0.425009	2.98661	-0.89019	0.189003		-0.95365	1.17664	-0.61432	-0.89894	-1.02622		1.91877	2.84901	-0.72024	-0.76827	1.15622
0.45896	0.593057	5.38264	0.56194	-0.20658	0.681931		-0.7331	0.423353	3.28043	-0.96821	0.181549		-0.9663	1.18284	-0.61378	-0.90416	-1.01471		1.88143	2.69558	-0.76353	-0.736	1.10219
0.46716	0.668782	5.28815	0.452769	-0.05835	0.582946		-0.78997	0.425235	3.54226	-1.04744	0.148326		-0.98406	1.16825	-0.6159	-0.89662	-1.01003		1.7597	2.52245	-0.84453	-0.67654	1.01332
0.47537	0.718183	5.14304	0.376215	0.005128	0.520875		-0.88507	0.429232	3.76111	-1.05123	0.082829		-1.0146	1.11078	-0.64289	-0.85119	-1.01722		1.57923	2.35435	-0.93286	-0.61182	0.887367
0.48357	0.742052	4.97198	0.330661	-0.07133	0.480868		-0.97663	0.443972	3.92616	-0.95765	-0.00253		-1.05085	1.01447	-0.69354	-0.75936	-1.03354		1.39508	2.21543	-0.99322	-0.5726	0.739151
0.49177	0.750846	4.7845	0.294993	-0.26811	0.449249		-1.03331	0.469536	4.01375	-0.84106	-0.082		-1.08179	0.910979	-0.75096	-0.64208	-1.05076		1.25079	2.13311	-1.01157	-0.58562	0.598744
0.49998	0.742039	4.57348	0.255888	-0.5057	0.418584		-1.05439	0.494144	4.01466	-0.81048	-0.12685		-1.08582	0.835733	-0.79957	-0.51424	-1.07249		1.16424	2.12204	-0.99205	-0.67018	0.481336
0.5081	0.703582	4.34974	0.219299	-0.69583	0.402251		-1.06088	0.51156	3.94138	-0.89728	-0.13249		-1.04738	0.809126	-0.83452	-0.40262	-1.10071		1.12221	2.16756	-0.96088	-0.80436	0.379313
0.5163	0.623583	4.12615	0.190736	-0.77523	0.413654		-1.06371	0.520203	3.83376	-1.04226	-0.12401		-0.95947	0.826098	-0.85427	-0.35874	-1.13584		1.10763	2.22616	-0.93831	-0.93865	0.2828
0.5245	0.521514	3.90402	0.17082	-0.74105	0.447195		-1.05743	0.529349	3.72439	-1.1408	-0.12923		-0.84968	0.877787	-0.85868	-0.39999	-1.16209		1.09338	2.23751	-0.93435	-1.03339	0.197028
0.53271	0.433384	3.67847	0.144854	-0.64327	0.482471		-1.03671	0.542952	3.6299	-1.13934	-0.1668		-0.76783	0.954018	-0.84959	-0.49442	-1.1632		1.05105	2.17955	-0.95271	-1.08458	0.143786
0.54091	0.388536	3.45222	0.101246	-0.55534	0.500229		-1.00626	0.551208	3.55743	-1.08138	-0.21581		-0.74533	1.06217	-0.84322	-0.56843	-1.13694		0.968166	2.08811	-0.98996	-1.13147	0.127749
0.54911	0.378774	3.23707	0.040428	-0.53417	0.501792		-0.98691	0.54099	3.51006	-1.03225	-0.24446		-0.77797	1.20144	-0.84887	-0.54864	-1.09027		0.85039	2.04088	-1.03927	-1.16706	0.124029
0.55732	0.370473	3.04037	-0.01752	-0.60567	0.504847		-0.99312	0.502137	3.48715	-1.03039	-0.24662		-0.8283	1.33277	-0.85927	-0.41942	-1.04774		0.7296	2.10003	-1.08198	-1.15214	0.101723
0.56552	0.357087	2.86018	-0.03932	-0.7521	0.527686		-1.01851	0.449916	3.46769	-1.06315	-0.24116		-0.87788	1.40959	-0.87156	-0.21585	-1.04115		0.641298	2.27465	-1.11294	-1.07176	0.049693
0.57372	0.353281	2.68503	-0.01386	-0.90367	0.560962		-1.04611	0.395646	3.42094	-1.11605	-0.25605		-0.92748	1.41787	-0.88761	-0.00431	-1.09283		0.606425	2.51439	-1.14189	-0.9469	-0.00896
0.58193	0.37361	2.5387	0.046669	-0.99065	0.58451		-1.06129	0.338844	3.33029	-1.19244	-0.29224		-0.96659	1.386	-0.91053	0.175068	-1.19155		0.614825	2.74157	-1.17377	-0.84028	-0.04895
0.59013	0.406137	2.44231	0.105859	-0.98342	0.58887		-1.05873	0.272517	3.20685	-1.2785	-0.33246		-0.97462	1.35166	-0.92914	0.317709	-1.2885		0.626098	2.91642	-1.19285	-0.79716	-0.05444
0.59825	0.42218	2.39129	0.141605	-0.90938	0.567177		-1.04509	0.191626	3.07793	-1.33315	-0.36404		-0.94241	1.35642	-0.93075	0.463216	-1.32342		0.60491	3.04211	-1.17496	-0.83451	-0.03225
0.60645	0.409508	2.35686	0.161845	-0.80665	0.518682		-1.03823	0.114118	2.96408	-1.2903	-0.38424		-0.89811	1.43143	-0.92224	0.659277	-1.27043		0.549352	3.14059	-1.12435	-0.94643	-0.01066
0.61466	0.377286	2.31824	0.184468	-0.70251	0.44528		-1.04981	0.061066	2.86845	-1.14301	-0.39554		-0.88279	1.6009	-0.9163	0.898237	-1.15818		0.487517	3.21259	-1.0761	-1.11746	-0.00585
0.62286	0.342103	2.27433	0.222712	-0.61819	0.367796		-1.08211	0.053524	2.79311	-0.94781	-0.40107		-0.92413	1.86188	-0.92234	1.11786	-1.01904		0.439368	3.23261	-1.06685	-1.32294	-0.01973
0.63106	0.3016	2.21956	0.261921	-0.57253	0.310217		-1.13225	0.101566	2.7479	-0.7827	-0.42181		-0.99987	2.15739	-0.9355	1.26594	-0.85685		0.400524	3.19105	-1.10062	-1.52201	-0.04215
0.63927	0.246016	2.14842	0.270758	-0.58925	0.281057		-1.1861	0.191254	2.73912	-0.70013	-0.48359		-1.06379	2.42292	-0.95701	1.3481	-0.65766		0.349686	3.10694	-1.15495	-1.67644	-0.06037
0.64747	0.179449	2.05094	0.21908	-0.64837	0.274431		-1.23988	0.292166	2.7447	-0.69675	-0.5895		-1.09102	2.63937	-0.9982	1.39199	-0.42468		0.275729	3.01298	-1.2114	-1.75927	-0.0628
0.65567	0.132003	1.92702	0.104013	-0.70477	0.266228		-1.28943	0.370928	2.73829	-0.74076	-0.70291		-1.08853	2.84259	-1.06363	1.41909	-0.21213		0.185559	2.92499	-1.26666	-1.78465	-0.03891
0.66388	0.148461	1.79355	-0.03292	-0.74417	0.246496		-1.32831	0.415659	2.70649	-0.78937	-0.7694		-1.08728	3.06494	-1.14515	1.42519	-0.07883		0.087952	2.83645	-1.32336	-1.79166	0.011963
0.67208	0.236865	1.67719	-0.12831	-0.79781	0.219906		-1.35129	0.434746	2.65992	-0.81304	-0.76131		-1.10617	3.27183	-1.22309	1.40096	-0.04733		0.005785	2.73922	-1.36584	-1.81092	0.070874
0.68028	0.347448	1.60306	-0.14151	-0.92693	0.191991		-1.35283	0.443979	2.62083	-0.8091	-0.67912		-1.14387	3.39975	-1.28328	1.37262	-0.08385		-0.03779	2.6428	-1.38829	-1.82742	0.101822
0.6884	0.403429	1.56695	-0.09759	-1.12265	0.165454		-1.33699	0.448246	2.60296	-0.79732	-0.55666		-1.18264	3.4101	-1.32258	1.36048	-0.13991		-0.02951	2.57394	-1.40365	-1.7966	0.088438
0.69661	0.375383	1.53916	-0.06013	-1.32027	0.131377		-1.31304	0.446	2.61251	-0.79023	-0.43398		-1.19831	3.3268	-1.34829	1.38942	-0.19235		0.028558	2.54801	-1.42694	-1.71624	0.040917
0.70481	0.295982	1.48586	-0.08373	-1.44139	0.084492		-1.29895	0.448574	2.64771	-0.7678	-0.3614		-1.18027	3.1956	-1.37085	1.47941	-0.23311		0.107129	2.53941	-1.46367	-1.63042	-0.01289
0.71301	0.214632	1.39114	-0.16855	-1.45965	0.029046		-1.30538	0.456976	2.69428	-0.70641	-0.37399		-1.13136	3.04892	-1.39438	1.63887	-0.25827		0.184271	2.50334	-1.50073	-1.59838	-0.05751
0.72121	0.159373	1.27467	-0.26569	-1.42513	-0.02531		-1.31621	0.459383	2.72702	-0.61051	-0.45735		-1.0759	2.90125	-1.41697	1.84276	-0.25631		0.254265	2.40492	-1.5294	-1.62752	-0.09876
0.72942	0.121234	1.16853	-0.33504	-1.39675	-0.07764		-1.30159	0.444453	2.71482	-0.55032	-0.56091		-1.03782	2.74849	-1.43302	2.03618	-0.22784		0.323963	2.26236	-1.55081	-1.67514	-0.13851
0.73762	0.092624	1.09868	-0.37677	-1.4168	-0.13927		-1.24346	0.424112	2.6442	-0.58786	-0.62365		-1.02682	2.58363	-1.45003	2.16969	-0.20179		0.391643	2.13397	-1.57139	-1.71398	-0.17269
0.74582	0.07701	1.07071	-0.41682	-1.4922	-0.22096		-1.16013	0.414601	2.52409	-0.69312	-0.61327		-1.04414	2.39952	-1.47559	2.20916	-0.21976		0.444682	2.05528	-1.59592	-1.74432	-0.18987
0.75403	0.072859	1.0732	-0.4589	-1.60007	-0.31076		-1.09443	0.411246	2.38903	-0.77339	-0.52117		-1.07665	2.20004	-1.49776	2.15018	-0.30442		0.480957	2.0019	-1.62197	-1.79136	-0.18802
0.76223	0.067631	1.08569	-0.48536	-1.7105	-0.3761		-1.0852	0.393975	2.27403	-0.74237	-0.34202		-1.1216	2.00808	-1.49011	2.01389	-0.42949		0.490128	1.92597	-1.6536	-1.84544	-0.18091
0.77043	0.042898	1.08964	-0.48601	-1.78392	-0.40145		-1.12612	0.343308	2.18852	-0.6182	-0.07801		-1.17691	1.85039	-1.43606	1.83069	-0.54281		0.46415	1.82078	-1.6897	-1.87454	-0.18015
0.77856	0.007111	1.0871	-0.46445	-1.78676	-0.39838		-1.16847	0.277448	2.11228	-0.49688	0.259529		-1.22612	1.73823	-1.36281	1.65504	-0.60737		0.391374	1.71105	-1.72291	-1.8747	-0.19649
0.78676	-0.02345	1.07946	-0.44525	-1.71869	-0.39251		-1.17633	0.227699	2.01471	-0.46799	0.620018		-1.24159	1.6591	-1.31314	1.5244	-0.63137		0.26154	1.62468	-1.74845	-1.84928	-0.22565
0.79496	-0.04729	1.05968	-0.45011	-1.62681	-0.40247		-1.15495	0.187789	1.89138	-0.55273	0.936479		-1.20779	1.59664	-1.31038	1.43815	-0.64774		0.079474	1.56224	-1.76332	-1.80931	-0.2607
0.80316	-0.07049	1.01107	-0.47867	-1.56986	-0.42788		-1.14303	0.137807	1.76758	-0.68823	1.1631		-1.14216	1.54354	-1.33591	1.3559	-0.67716		-0.13222	1.50557	-1.77419	-1.76615	-0.29976
0.81137	-0.09801	0.935296	-0.51881	-1.58032	-0.46804		-1.16423	0.075609	1.68049	-0.78842	1.28652		-1.08063	1.49656	-1.3505	1.23113	-0.71568		-0.33762	1.43972	-1.78922	-1.74538	-0.34656
0.81957	-0.12174	0.86153	-0.55619	-1.64491	-0.52263		-1.20506	0.030995	1.6407	-0.79195	1.31706		-1.04777	1.45592	-1.34264	1.04241	-0.7388		-0.50284	1.35838	-1.81723	-1.75825	-0.40028
0.82777	-0.134	0.807514	-0.58885	-1.70477	-0.59564		-1.22754	0.027603	1.62645	-0.70513	1.26491		-1.03697	1.41599	-1.32741	0.828848	-0.74613		-0.60106	1.27378	-1.84837	-1.76387	-0.44221
0.83598	-0.13273	0.768771	-0.61681	-1.70011	-0.67573		-1.19882	0.057608	1.60686	-0.5915	1.14612		-1.03796	1.37885	-1.32254	0.679941	-0.76347		-0.62563	1.19835	-1.86092	-1.70541	-0.46013
0.84418	-0.12904	0.719883	-0.64297	-1.60337	-0.73949		-1.12736	0.08315	1.56231	-0.5106	0.986644		-1.05822	1.33691	-1.33189	0.628292	-0.81098		-0.58022	1.1643	-1.83942	-1.57768	-0.45941
0.85238	-0.13243	0.653878	-0.66815	-1.45938	-0.76996		-1.04813	0.057018	1.50619	-0.50795	0.819306		-1.10194	1.28445	-1.34259	0.617508	-0.88919		-0.47552	1.18403	-1.79031	-1.45408	-0.45739
0.86059	-0.14589	0.589447	-0.68689	-1.334	-0.75794		-1.00291	-0.03387	1.45118	-0.58254	0.672251		-1.15189	1.22155	-1.33807	0.539655	-0.97721		-0.33778	1.22622	-1.7455	-1.39374	-0.45748
0.86871	-0.16746	0.532186	-0.70009	-1.26283	-0.71712		-1.00032	-0.17232	1.4	-0.70002	0.555873		-1.16649	1.15372	-1.30272	0.352617	-1.05725		-0.21092	1.24861	-1.7247	-1.36944	-0.43729
0.87691	-0.1892	0.474955	-0.71153	-1.21977	-0.67178		-1.00907	-0.30081	1.33854	-0.81052	0.47189		-1.13164	1.09947	-1.23589	0.135487	-1.11393		-0.13865	1.2218	-1.72353	-1.2988	-0.38192
0.88511	-0.20592	0.399985	-0.7276	-1.12916	-0.64201		-1.00052	-0.362	1.24631	-0.86944	0.412574		-1.07991	1.06688	-1.14787	0.004855	-1.13996		-0.1219	1.16057	-1.72358	-1.14796	-0.30746
0.89332	-0.21413	0.310195	-0.74119	-0.95731	-0.64198		-0.97476	-0.33147	1.13552	-0.8487	0.365166		-1.0636	1.06072	-1.05676	0.031845	-1.15117		-0.10716	1.08997	-1.71988	-0.96986	-0.2622
0.90152	-0.22753	0.229282	-0.7449	-0.74195	-0.66794		-0.95717	-0.23559	1.03782	-0.7525	0.309376		-1.10828	1.07673	-0.97231	0.171466	-1.16221		-0.04764	1.0245	-1.72364	-0.816	-0.27107
0.90972	-0.26752	0.172838	-0.73666	-0.54447	-0.70277		-0.95751	-0.13756	0.981167	-0.62595	0.238041		-1.1856	1.09304	-0.88284	0.32734	-1.18244		0.05588	0.956366	-1.73619	-0.6813	-0.3184
0.91793	-0.33912	0.146581	-0.71073	-0.39045	-0.71956		-0.95871	-0.08437	0.955536	-0.51124	0.164275		-1.25952	1.08793	-0.76796	0.397572	-1.20246		0.152476	0.874476	-1.75245	-0.52102	-0.3708
0.92613	-0.42717	0.144306	-0.66256	-0.25876	-0.70634		-0.9459	-0.0949	0.922284	-0.44358	0.101256		-1.31082	1.05397	-0.61718	0.331549	-1.20047		0.204354	0.783773	-1.75592	-0.34251	-0.41161
0.93433	-0.50475	0.165253	-0.5996	-0.14019	-0.672		-0.92132	-0.16099	0.855882	-0.42886	0.048414		-1.34554	1.01296	-0.45689	0.169076	-1.15712		0.211714	0.706967	-1.7381	-0.21831	-0.46197
0.94254	-0.56286	0.19606	-0.55304	-0.05193	-0.6399		-0.89994	-0.2701	0.761795	-0.4412	-0.02396		-1.37528	0.993906	-0.33204	-0.0258	-1.06453		0.210476	0.658163	-1.70799	-0.20559	-0.54045
0.95074	-0.60365	0.212711	-0.54891	-0.02241	-0.62743		-0.88463	-0.4023	0.673757	-0.43662	-0.14015		-1.39549	1.00334	-0.27925	-0.20897	-0.93331		0.242851	0.62301	-1.67507	-0.27899	-0.63997
0.95886	-0.62246	0.188767	-0.58676	-0.03823	-0.62879		-0.87822	-0.51332	0.610868	-0.38174	-0.28989		-1.40964	1.01471	-0.30497	-0.38384	-0.78948		0.31264	0.579059	-1.65427	-0.32606	-0.72682
0.96706	-0.62035	0.11511	-0.64118	-0.03664	-0.62836		-0.88403	-0.56689	0.56703	-0.30164	-0.43635		-1.42691	1.0008	-0.38222	-0.57612	-0.67189		0.392103	0.517897	-1.64882	-0.24427	-0.76533
0.97527	-0.60133	0.015817	-0.68418	0.01294	-0.61681		-0.89923	-0.54235	0.526161	-0.24225	-0.53721		-1.45317	0.970968	-0.47495	-0.7865	-0.60695		0.440365	0.451005	-1.65751	-0.01402	-0.7484
0.98347	-0.58709	-0.06761	-0.71809	0.075765	-0.60521		-0.91473	-0.46921	0.473869	-0.24564	-0.58446		-1.47474	0.935857	-0.54773	-0.98173	-0.59971		0.443592	0.395673	-1.67078	0.308913	-0.68646
0.99167	-0.59318	-0.10269	-0.74828	0.080854	-0.608		-0.92505	-0.40654	0.405769	-0.31926	-0.59195		-1.46127	0.898165	-0.58844	-1.10226	-0.64248		0.420183	0.354982	-1.67632	0.622643	-0.60976
0.99988	-0.60945	-0.09204	-0.77079	0.000991	-0.6232		-0.92888	-0.3959	0.32184	-0.4196	-0.57925		-1.4049	0.853799	-0.59516	-1.11897	-0.72894		0.38785	0.328009	-1.66162	0.8668	-0.55318
1.00808	-0.61825	-0.05809	-0.77575	-0.13108	-0.64319		-0.90471	-0.44695	0.239676	-0.51851	-0.55708		-1.32678	0.811402	-0.569	-1.03677	-0.85356		0.343161	0.311756	-1.62634	1.02963	-0.53929
1.01628	-0.61618	-0.02608	-0.76215	-0.25755	-0.65861		-0.84449	-0.53145	0.189772	-0.60266	-0.53306		-1.26214	0.788325	-0.51511	-0.90499	-0.98042		0.276755	0.308581	-1.59437	1.13021	-0.56937
1.02448	-0.62668	-0.01063	-0.74758	-0.36094	-0.674		-0.77493	-0.61921	0.201273	-0.65659	-0.52408		-1.23056	0.796209	-0.44098	-0.79523	-1.05524		0.200936	0.319631	-1.58933	1.18767	-0.61959
1.03269	-0.656	-0.00585	-0.7438	-0.47543	-0.68504		-0.74216	-0.68444	0.261586	-0.63526	-0.54576		-1.23672	0.837717	-0.37234	-0.7654	-1.04019		0.125266	0.33725	-1.61306	1.22884	-0.66734
1.04089	-0.68481	0.003367	-0.75675	-0.61053	-0.68405		-0.77282	-0.70867	0.328377	-0.48965	-0.61537		-1.27221	0.90389	-0.33756	-0.8153	-0.95752		0.039774	0.345647	-1.64562	1.28662	-0.69777
1.04909	-0.68066	0.033715	-0.78181	-0.73187	-0.69059		-0.83721	-0.69128	0.374982	-0.21428	-0.73158		-1.31136	1.00071	-0.34757	-0.88132	-0.86909		-0.05781	0.319447	-1.67496	1.38225	-0.70579
1.05722	-0.63687	0.086709	-0.80799	-0.77693	-0.72752		-0.88643	-0.64442	0.402986	0.153833	-0.86983		-1.32879	1.117	-0.3962	-0.9202	-0.82086		-0.13477	0.258192	-1.71015	1.50216	-0.68981
1.06542	-0.58372	0.146902	-0.81952	-0.72496	-0.79691		-0.88819	-0.60118	0.431071	0.521701	-0.99246		-1.31459	1.22052	-0.46333	-0.93529	-0.81867		-0.13907	0.205395	-1.76411	1.59733	-0.64914
1.07362	-0.56092	0.207744	-0.80942	-0.62971	-0.86333		-0.85163	-0.578	0.460357	0.808327	-1.07157		-1.29009	1.30305	-0.52742	-0.95245	-0.82991		-0.07858	0.208841	-1.82782	1.65186	-0.58407
1.08183	-0.58783	0.274939	-0.78987	-0.55673	-0.89215		-0.80343	-0.57278	0.472198	0.977684	-1.10147		-1.28185	1.3699	-0.56941	-0.98156	-0.83259		-0.01465	0.291767	-1.86746	1.69764	-0.49663
1.09003	-0.64307	0.377682	-0.78096	-0.54607	-0.8874		-0.75104	-0.57917	0.450588	1.05001	-1.08292		-1.29684	1.42968	-0.58496	-0.98891	-0.83503		-0.00414	0.437532	-1.86546	1.76227	-0.39754
1.09823	-0.68788	0.5273	-0.80233	-0.59053	-0.87917		-0.70271	-0.60613	0.396843	1.06071	-1.02536		-1.31301	1.47006	-0.58636	-0.94973	-0.85457		-0.03755	0.605101	-1.83749	1.83788	-0.2946
1.10643	-0.69466	0.693525	-0.85514	-0.67936	-0.89312		-0.67629	-0.67155	0.336962	1.0199	-0.9428		-1.2966	1.47255	-0.59356	-0.88734	-0.8995		-0.0617	0.753816	-1.80403	1.90097	-0.19887
1.11464	-0.66832	0.819206	-0.92071	-0.80103	-0.91973		-0.69955	-0.76884	0.289793	0.925928	-0.86801		-1.24716	1.43019	-0.61148	-0.85512	-0.95346		-0.05785	0.867987	-1.77912	1.95299	-0.11938
1.12284	-0.63687	0.865723	-0.9702	-0.917	-0.93812		-0.78334	-0.86467	0.254803	0.785879	-0.84483		-1.18069	1.35011	-0.61593	-0.87829	-0.9983		-0.04212	0.940728	-1.76521	1.99097	-0.06185
1.13104	-0.60895	0.837622	-0.97896	-0.98652	-0.9479		-0.90103	-0.91799	0.217436	0.638934	-0.88436		-1.11904	1.25223	-0.58778	-0.93925	-1.03095		-0.03846	0.966169	-1.76847	1.99218	-0.02802
1.13925	-0.57213	0.777983	-0.94643	-0.98595	-0.96648		-1.00437	-0.92436	0.165741	0.512998	-0.954		-1.08041	1.14849	-0.53403	-1.02577	-1.06828		-0.045	0.948854	-1.79276	1.94027	-0.0008
1.14737	-0.50644	0.73051	-0.88858	-0.96149	-0.99975		-1.05269	-0.90568	0.108774	0.405705	-1.00041		-1.06738	1.05287	-0.4902	-1.10708	-1.12464		-0.05557	0.90547	-1.8275	1.83121	0.034753
1.15557	-0.41014	0.702219	-0.82474	-0.99294	-1.02874		-1.04436	-0.8821	0.059008	0.29953	-1.00782		-1.0788	0.982849	-0.47799	-1.13587	-1.18549		-0.08693	0.852018	-1.85116	1.70913	0.079936
1.16378	-0.30946	0.67093	-0.75655	-1.10658	-1.03905		-1.0062	-0.86612	0.019443	0.171846	-1.0018		-1.11002	0.940598	-0.48373	-1.07491	-1.22128		-0.14805	0.802072	-1.84476	1.60908	0.115409
1.17198	-0.23155	0.620153	-0.67608	-1.24955	-1.0325		-0.96772	-0.84785	-0.02556	0.029812	-1.00779		-1.15431	0.922466	-0.47545	-0.95023	-1.20651		-0.22488	0.762161	-1.8204	1.52565	0.1151
1.18018	-0.19636	0.54945	-0.59085	-1.35234	-1.02439		-0.93384	-0.81751	-0.08536	-0.11366	-1.02773		-1.19866	0.913634	-0.43339	-0.8533	-1.15222		-0.27661	0.731121	-1.80408	1.43158	0.07937
1.18838	-0.19319	0.468434	-0.51284	-1.40901	-1.02443		-0.88497	-0.7697	-0.14254	-0.24186	-1.02835		-1.2302	0.895072	-0.37374	-0.85003	-1.0923		-0.26363	0.697243	-1.80903	1.30446	0.027755
1.19659	-0.20404	0.386696	-0.45958	-1.44462	-1.03231		-0.80474	-0.71348	-0.17335	-0.30964	-0.9887		-1.24386	0.842268	-0.31788	-0.90282	-1.05788		-0.16984	0.654776	-1.83501	1.15623	-0.01248
1.20479	-0.22269	0.324279	-0.43919	-1.45947	-1.04217		-0.70012	-0.67804	-0.1749	-0.28277	-0.92144		-1.23197	0.755446	-0.26785	-0.9233	-1.05528		0.00684	0.601239	-1.86756	1.01433	-0.02553
1.21299	-0.24792	0.292852	-0.44737	-1.41706	-1.04065		-0.60736	-0.68748	-0.1698	-0.17697	-0.86004		-1.19919	0.657561	-0.21446	-0.88303	-1.06714		0.269126	0.54485	-1.88903	0.920421	-0.01098
1.2212	-0.28116	0.275252	-0.47063	-1.30704	-1.02157		-0.55193	-0.75612	-0.17679	-0.0728	-0.82558		-1.16013	0.583481	-0.15414	-0.81869	-1.07054		0.622736	0.504628	-1.89003	0.894386	0.021188
1.2294	-0.31768	0.239084	-0.48531	-1.17546	-0.97118		-0.53141	-0.86549	-0.19524	-0.02932	-0.81473		-1.13818	0.561871	-0.10259	-0.76689	-1.04183		1.04209	0.480645	-1.88558	0.900438	0.052591
1.23752	-0.35017	0.16076	-0.47747	-1.07565	-0.89166		-0.52529	-0.98687	-0.19849	-0.0447	-0.8101		-1.14778	0.592007	-0.06399	-0.73252	-0.99089		1.49159	0.46059	-1.90027	0.900472	0.080886
1.24572	-0.37276	0.063742	-0.45094	-1.02084	-0.81126		-0.5221	-1.09361	-0.15007	-0.07093	-0.79981		-1.17843	0.66252	-0.02492	-0.69809	-0.94347		1.90552	0.420632	-1.94217	0.888747	0.128653
1.25393	-0.38275	-0.01316	-0.42632	-0.97894	-0.76198		-0.53905	-1.16466	-0.03153	-0.04842	-0.79271		-1.20772	0.752879	0.028358	-0.65834	-0.92405		2.23462	0.365689	-1.99012	0.881569	0.219544
1.26213	-0.37793	-0.05529	-0.41709	-0.93683	-0.76486		-0.58279	-1.18962	0.147939	0.069416	-0.80574		-1.2247	0.841619	0.09306	-0.60749	-0.94779		2.47124	0.316799	-2.00915	0.868213	0.351712
1.27033	-0.36165	-0.08491	-0.41353	-0.90295	-0.80302		-0.63371	-1.17064	0.35157	0.322275	-0.84822		-1.25476	0.903467	0.151057	-0.54364	-1.0017		2.65632	0.279587	-1.99159	0.820989	0.499607
1.27854	-0.35868	-0.12591	-0.40291	-0.86963	-0.83625		-0.66247	-1.13114	0.540467	0.731638	-0.91782		-1.31684	0.917157	0.193257	-0.45508	-1.06905		2.8602	0.242389	-1.94991	0.720696	0.637646
1.28674	-0.38958	-0.16076	-0.38568	-0.83284	-0.82851		-0.6595	-1.09315	0.693312	1.28843	-0.99058		-1.39927	0.880296	0.224087	-0.33801	-1.14096		3.12253	0.187393	-1.9007	0.579507	0.754471
1.29494	-0.44291	-0.16591	-0.37724	-0.79972	-0.77192		-0.65112	-1.06165	0.807853	1.94572	-1.03741		-1.45645	0.799229	0.260293	-0.22309	-1.20672		3.43079	0.121538	-1.84102	0.430234	0.851363
1.30315	-0.47438	-0.14105	-0.39351	-0.81375	-0.69709		-0.65867	-1.02621	0.891814	2.61371	-1.03757		-1.44058	0.700082	0.329073	-0.14147	-1.25042		3.73265	0.0654	-1.75755	0.283636	0.917808
1.31135	-0.44861	-0.11746	-0.43958	-0.90113	-0.64007		-0.69076	-0.9787	0.932343	3.17179	-1.00462		-1.35176	0.604785	0.468757	-0.1293	-1.26527		3.98595	0.036103	-1.65352	0.163452	0.936942
1.31955	-0.3788	-0.12625	-0.50442	-1.04161	-0.61599		-0.74671	-0.93082	0.917506	3.49794	-0.97486		-1.24198	0.523872	0.715294	-0.18471	-1.27218		4.20546	0.040915	-1.54027	0.075309	0.907358
1.32767	-0.31339	-0.16111	-0.56772	-1.19299	-0.60835		-0.8298	-0.90158	0.854524	3.55288	-0.96935		-1.18988	0.471359	1.0776	-0.25099	-1.28327		4.4238	0.083527	-1.44012	0.015774	0.85418
1.33588	-0.30121	-0.19254	-0.61943	-1.32173	-0.60033		-0.9269	-0.90924	0.768485	3.41526	-0.97926		-1.22747	0.451193	1.52697	-0.26987	-1.29535		4.66522	0.162908	-1.36511	-0.03418	0.813096
1.34408	-0.34084	-0.19507	-0.66005	-1.43479	-0.59185		-0.99709	-0.94862	0.682562	3.24243	-0.97389		-1.31982	0.462133	1.99602	-0.2278	-1.28974		4.9081	0.246851	-1.31931	-0.11152	0.800062
1.35228	-0.39721	-0.1685	-0.70783	-1.54018	-0.58746		-0.99848	-0.99182	0.611038	3.12689	-0.95189		-1.4006	0.486391	2.40695	-0.18171	-1.24946		5.10642	0.292176	-1.30519	-0.22897	0.810728
1.36049	-0.43536	-0.13534	-0.76819	-1.61589	-0.59271		-0.9208	-1.01057	0.553918	3.04512	-0.93408		-1.42083	0.494589	2.70717	-0.17435	-1.17448		5.22491	0.283647	-1.31355	-0.37957	0.813259
1.36869	-0.44254	-0.11719	-0.82354	-1.62124	-0.61166		-0.80698	-0.99253	0.501083	2.9278	-0.94101		-1.3904	0.454008	2.86439	-0.21644	-1.0703		5.24624	0.249743	-1.33502	-0.51316	0.772426
1.37689	-0.43493	-0.09651	-0.8563	-1.54843	-0.65204		-0.71688	-0.96237	0.44707	2.71537	-0.97921		-1.34441	0.358128	2.89748	-0.30781	-0.94604		5.1789	0.223595	-1.35317	-0.57017	0.683564
1.38509	-0.42965	-0.01244	-0.85899	-1.45564	-0.70748		-0.68775	-0.94881	0.391847	2.41415	-1.02405		-1.30241	0.238836	2.85281	-0.42215	-0.81168		5.0387	0.213046	-1.36	-0.51695	0.562244
1.3933	-0.44069	0.180715	-0.84331	-1.42498	-0.76062		-0.7207	-0.96108	0.336305	2.07424	-1.05153		-1.26597	0.146851	2.7854	-0.50223	-0.68223		4.85269	0.218069	-1.35765	-0.36547	0.439646
1.4015	-0.47075	0.480476	-0.81921	-1.49012	-0.7887		-0.78408	-0.97973	0.280046	1.75544	-1.05656		-1.24011	0.116664	2.73178	-0.49269	-0.57165		4.65973	0.229272	-1.35245	-0.19685	0.34546
1.4097	-0.50713	0.82065	-0.80144	-1.58465	-0.77906		-0.83598	-0.98102	0.21903	1.50993	-1.0492		-1.24486	0.134737	2.70939	-0.40177	-0.49457		4.49474	0.237629	-1.35335	-0.07561	0.310418
1.41783	-0.53324	1.11134	-0.79923	-1.62347	-0.74565		-0.83938	-0.97114	0.154207	1.3439	-1.03532		-1.28385	0.161124	2.73326	-0.2858	-0.46311		4.37696	0.221106	-1.36302	-0.01609	0.362401
1.42603	-0.54111	1.2936	-0.80828	-1.58154	-0.69576		-0.77971	-0.95822	0.093603	1.24636	-1.00709		-1.33937	0.158397	2.80762	-0.18745	-0.46979		4.28707	0.171424	-1.38229	0.001913	0.498365
1.43423	-0.54859	1.3667	-0.8161	-1.48415	-0.63148		-0.67129	-0.95062	0.051721	1.19821	-0.96135		-1.38472	0.120463	2.91839	-0.08136	-0.49884		4.19878	0.120481	-1.41421	-0.00079	0.67207
1.44244	-0.57317	1.38284	-0.80365	-1.35117	-0.55742		-0.54551	-0.95129	0.048219	1.17413	-0.90242		-1.41449	0.070095	3.02285	0.09203	-0.52717		4.09459	0.112421	-1.46175	-0.02173	0.802465
1.45064	-0.60932	1.39334	-0.77133	-1.14943	-0.48593		-0.4394	-0.95546	0.089598	1.14707	-0.8493		-1.43834	0.021973	3.08115	0.314499	-0.54097		3.98416	0.16574	-1.52246	-0.05012	0.836457
1.45884	-0.63721	1.42395	-0.73832	-0.85084	-0.42699		-0.36701	-0.95314	0.166776	1.08311	-0.8203		-1.4587	-0.02428	3.07457	0.501096	-0.54704		3.88263	0.252271	-1.59156	-0.06775	0.783856
1.46705	-0.64736	1.46004	-0.72247	-0.45714	-0.37316		-0.33208	-0.93227	0.253812	0.993414	-0.81101		-1.46644	-0.07957	3.01117	0.585168	-0.55158		3.78952	0.329996	-1.66545	-0.06001	0.696697
1.47525	-0.65452	1.47358	-0.73023	-0.02417	-0.33265		-0.32732	-0.89184	0.330196	0.933406	-0.79236		-1.44444	-0.14648	2.90985	0.589425	-0.55433		3.7025	0.381843	-1.72615	-0.05351	0.619615
1.48345	-0.67575	1.47115	-0.76072	0.375351	-0.32035		-0.33518	-0.84963	0.383639	0.945177	-0.73745		-1.38479	-0.21341	2.78358	0.577179	-0.54196		3.6195	0.411305	-1.75388	-0.09033	0.561538
1.49165	-0.70462	1.47677	-0.81204	0.696242	-0.34516		-0.34328	-0.83751	0.412892	1.0031	-0.64427		-1.29111	-0.2706	2.64771	0.581899	-0.51105		3.5465	0.43569	-1.74022	-0.18013	0.510663
1.49986	-0.71228	1.49734	-0.86888	0.894158	-0.40262		-0.34072	-0.86687	0.428031	1.04429	-0.52499		-1.19454	-0.3028	2.51546	0.608746	-0.46668		3.47698	0.453738	-1.70666	-0.2798	0.455147
1.50798	-0.68674	1.51305	-0.9069	0.971335	-0.46671		-0.32237	-0.91822	0.430617	1.02862	-0.40547		-1.14284	-0.30717	2.37952	0.633488	-0.41498		3.39922	0.444595	-1.68187	-0.32057	0.395425
1.51618	-0.65168	1.50279	-0.90906	0.970586	-0.5102		-0.28823	-0.96274	0.416678	0.956092	-0.30056		-1.15585	-0.2896	2.21694	0.636722	-0.36054		3.30492	0.393006	-1.66723	-0.28042	0.331173
1.52438	-0.64195	1.47437	-0.87172	0.933335	-0.51353		-0.24698	-0.98059	0.374746	0.864422	-0.21334		-1.21512	-0.26267	2.01673	0.585846	-0.28865		3.19162	0.303762	-1.6369	-0.18527	0.26047
1.53259	-0.6761	1.44521	-0.81036	0.857978	-0.47904		-0.21509	-0.97083	0.302888	0.776545	-0.15421		-1.26955	-0.24051	1.80846	0.444454	-0.16954		3.07501	0.208319	-1.56613	-0.0861	0.195139
1.54079	-0.72863	1.4309	-0.74438	0.701402	-0.42853		-0.20637	-0.93744	0.215918	0.698703	-0.13985		-1.28388	-0.22209	1.63318	0.23391	0.016895		2.97034	0.138114	-1.47301	-0.01448	0.15521
1.54899	-0.76144	1.43447	-0.6985	0.460814	-0.38789		-0.22932	-0.89562	0.126883	0.61865	-0.1842		-1.26642	-0.20526	1.52104	0.015841	0.271204		2.88571	0.105074	-1.40782	0.030532	0.164261
1.5572	-0.75461	1.45229	-0.68582	0.192962	-0.36292		-0.2743	-0.86984	0.041343	0.533484	-0.2631		-1.24746	-0.18332	1.4589	-0.13937	0.572266		2.82384	0.093752	-1.39663	0.039765	0.216261
1.5654	-0.7281	1.46678	-0.70531	-0.01019	-0.32765		-0.32921	-0.8795	-0.03942	0.471336	-0.32938		-1.25335	-0.15375	1.41156	-0.22583	0.872287		2.77205	0.08795	-1.42343	0.025008	0.279872
1.5736	-0.71722	1.45475	-0.73265	-0.1005	-0.26169		-0.38981	-0.93327	-0.10701	0.457913	-0.34641		-1.28411	-0.11962	1.35401	-0.27989	1.10875		2.70561	0.094446	-1.4496	0.017221	0.318168
1.58181	-0.73265	1.41326	-0.73833	-0.12096	-0.17393		-0.45032	-1.00429	-0.14528	0.495758	-0.30888		-1.33345	-0.08822	1.27425	-0.30836	1.24319		2.60316	0.111721	-1.4582	0.055912	0.305624
1.59001	-0.76424	1.35752	-0.72456	-0.15812	-0.10281		-0.49232	-1.05126	-0.14328	0.532663	-0.24254		-1.38537	-0.07245	1.18773	-0.286	1.28264		2.48188	0.127347	-1.46432	0.143825	0.247116
1.59821	-0.78375	1.31397	-0.72233	-0.26654	-0.06798		-0.50008	-1.03924	-0.10889	0.520227	-0.1709		-1.41437	-0.08324	1.11366	-0.19096	1.27565		2.37903	0.128707	-1.48928	0.2193	0.164389
1.60633	-0.77652	1.28743	-0.76062	-0.40798	-0.04985		-0.47837	-0.96846	-0.06812	0.469006	-0.09971		-1.40569	-0.12935	1.05949	-0.04985	1.27563		2.31611	0.127452	-1.53446	0.231611	0.090806
1.61454	-0.75447	1.26839	-0.82697	-0.49804	-0.01751		-0.45537	-0.87207	-0.03946	0.418914	-0.0224		-1.36355	-0.20065	1.00899	0.080081	1.31387		2.28859	0.139876	-1.57725	0.168849	0.050603
1.62274	-0.73841	1.24817	-0.88078	-0.46381	0.04086		-0.46838	-0.77453	-0.02439	0.402649	0.056769		-1.30624	-0.27892	0.934792	0.147306	1.4022		2.26966	0.173655	-1.60131	0.057773	0.053939
1.63094	-0.74721	1.23891	-0.90177	-0.33204	0.102223		-0.52254	-0.68813	-0.01675	0.416869	0.110843		-1.24514	-0.33866	0.831473	0.140208	1.53243		2.23652	0.222373	-1.60662	-0.06927	0.093733
1.63915	-0.77671	1.25574	-0.90115	-0.20417	0.139302		-0.58519	-0.6087	-0.00962	0.460326	0.122498		-1.17204	-0.36194	0.706873	0.096858	1.68412		2.18221	0.272966	-1.59739	-0.19274	0.138013
1.64735	-0.8013	1.27623	-0.90688	-0.15702	0.142171		-0.61535	-0.52208	0.000206	0.546384	0.087487		-1.07005	-0.34782	0.597729	0.071235	1.82042		2.11823	0.340386	-1.56026	-0.28755	0.150825
1.65555	-0.79367	1.27438	-0.92535	-0.19494	0.132013		-0.59646	-0.41668	0.011992	0.670287	0.017345		-0.94759	-0.30394	0.538588	0.090889	1.91019		2.05669	0.429597	-1.48404	-0.31654	0.11478
1.66376	-0.75739	1.2462	-0.93895	-0.24384	0.137811		-0.56039	-0.28502	0.015553	0.809206	-0.05861		-0.83656	-0.256	0.538511	0.110567	1.94592		2.00955	0.523963	-1.39919	-0.25022	0.045978
1.67196	-0.72239	1.21596	-0.93923	-0.24931	0.145649		-0.54489	-0.13742	0.010096	0.928223	-0.09871		-0.75703	-0.22495	0.574832	0.085075	1.93498		1.98916	0.587574	-1.36395	-0.1139	-0.02636
1.68016	-0.71359	1.21077	-0.93534	-0.22525	0.119868		-0.55938	0.011011	-0.0024	1.01791	-0.06446		-0.7104	-0.21779	0.602025	0.022511	1.89644		1.99641	0.59673	-1.41661	0.043578	-0.09012
1.68836	-0.74469	1.22323	-0.94347	-0.21085	0.047115		-0.58013	0.151694	-0.01765	1.0977	0.054715		-0.68294	-0.23291	0.590573	-0.02284	1.83726		2.0317	0.566166	-1.52982	0.190325	-0.15288
1.69649	-0.79648	1.23418	-0.96969	-0.23083	-0.04295		-0.57746	0.294113	-0.03615	1.19015	0.235782		-0.66502	-0.25926	0.548275	0.00023	1.75802		2.08815	0.519012	-1.63673	0.31485	-0.22374
1.70469	-0.84348	1.24341	-1.01867	-0.29337	-0.09929		-0.53967	0.441835	-0.06826	1.28902	0.431591		-0.6524	-0.30044	0.507872	0.061462	1.64457		2.14397	0.473212	-1.67817	0.414615	-0.2914
1.71289	-0.87425	1.30445	-1.07907	-0.40961	-0.10622		-0.47322	0.581344	-0.11699	1.37846	0.602692		-0.63567	-0.36589	0.483369	0.098748	1.47509		2.16824	0.434099	-1.64983	0.485979	-0.34252
1.7211	-0.89408	1.48324	-1.12168	-0.55918	-0.09665		-0.40459	0.699382	-0.17712	1.45478	0.716147		-0.60076	-0.45853	0.464899	0.074469	1.2522		2.13343	0.42324	-1.60857	0.537876	-0.37166
1.7293	-0.90464	1.77997	-1.11329	-0.69803	-0.11291		-0.36292	0.790718	-0.23292	1.48601	0.750158		-0.54344	-0.56099	0.442046	0.008327	1.00903		2.04421	0.478685	-1.61124	0.565026	-0.3838
1.7375	-0.89328	2.12294	-1.04344	-0.79795	-0.15625		-0.36231	0.860611	-0.27311	1.4449	0.709634		-0.49403	-0.62979	0.430441	-0.0518	0.787515		1.92014	0.609075	-1.6712	0.567506	-0.38971
1.74571	-0.85531	2.41726	-0.94515	-0.84708	-0.20123		-0.39892	0.900973	-0.30358	1.32797	0.627214		-0.48047	-0.62494	0.453492	-0.07414	0.607244		1.79612	0.780077	-1.74467	0.542723	-0.39705
1.75391	-0.79294	2.6137	-0.86261	-0.8841	-0.23518		-0.45199	0.902059	-0.33466	1.17854	0.559193		-0.49951	-0.51564	0.506579	-0.04399	0.467245		1.70313	0.937678	-1.7747	0.48382	-0.42068
1.76211	-0.73214	2.71779	-0.82468	-0.95536	-0.26512		-0.50556	0.869326	-0.37686	1.06631	0.537261		-0.53344	-0.29766	0.564318	0.01143	0.36889		1.65123	1.05502	-1.74814	0.424009	-0.46001
1.77032	-0.70097	2.75719	-0.82619	-1.05348	-0.30038		-0.5512	0.822079	-0.42264	1.03032	0.54987		-0.55015	0.002652	0.599093	0.067597	0.316757		1.63111	1.14074	-1.69548	0.409768	-0.49998
1.77852	-0.70116	2.75755	-0.84984	-1.13154	-0.33124		-0.57669	0.783023	-0.44987	1.07491	0.562678		-0.52928	0.332375	0.602606	0.12286	0.307593		1.61047	1.21698	-1.66192	0.452559	-0.52945
1.78664	-0.7135	2.73944	-0.88488	-1.15488	-0.33825		-0.5712	0.747489	-0.44221	1.17562	0.548247		-0.47102	0.620707	0.586826	0.177957	0.318486		1.55661	1.28777	-1.66181	0.501884	-0.55331
1.79484	-0.70907	2.73775	-0.92073	-1.13117	-0.30719		-0.54521	0.70836	-0.4093	1.33584	0.509339		-0.39464	0.80545	0.557918	0.231509	0.330221		1.46922	1.34399	-1.68462	0.488551	-0.59181
1.80304	-0.68221	2.7736	-0.95511	-1.08615	-0.24939		-0.5333	0.671491	-0.37787	1.55404	0.45337		-0.31678	0.874045	0.517827	0.269508	0.338941		1.37753	1.39235	-1.71814	0.403349	-0.6413
1.81125	-0.65599	2.82393	-0.98031	-1.04781	-0.1895		-0.54646	0.65662	-0.35975	1.79293	0.394247		-0.2593	0.857504	0.468658	0.296653	0.339278		1.30907	1.44753	-1.74472	0.291146	-0.67249
1.81945	-0.65735	2.82779	-0.98986	-1.02598	-0.14247		-0.56403	0.68575	-0.35049	1.99389	0.343387		-0.24424	0.800615	0.412618	0.330419	0.315498		1.26167	1.51791	-1.75176	0.219392	-0.65682
1.82766	-0.69107	2.75528	-0.9849	-1.02723	-0.11749		-0.55342	0.739787	-0.34263	2.10585	0.301869		-0.27186	0.737147	0.347712	0.37434	0.25931		1.22244	1.58395	-1.73287	0.220299	-0.59346
1.83586	-0.72991	2.64149	-0.96837	-1.05301	-0.1168		-0.51462	0.768648	-0.34383	2.11961	0.26369		-0.32562	0.686523	0.265088	0.411269	0.196251		1.18704	1.61669	-1.70005	0.275953	-0.50939
1.84406	-0.7513	2.54535	-0.9463	-1.08988	-0.14343		-0.47562	0.721313	-0.35589	2.04639	0.208145		-0.38572	0.654614	0.17071	0.430245	0.156231		1.15818	1.59794	-1.67649	0.341999	-0.41999
1.85226	-0.74659	2.50084	-0.91255	-1.126	-0.18733		-0.45629	0.587901	-0.36357	1.90905	0.123479		-0.44106	0.64196	0.081642	0.442801	0.150566		1.1274	1.52683	-1.68416	0.384239	-0.32874
1.86047	-0.72111	2.48778	-0.86316	-1.13877	-0.22529		-0.45689	0.407249	-0.35198	1.74846	0.017173		-0.48768	0.625112	0.016676	0.452432	0.154078		1.08269	1.42622	-1.72279	0.398743	-0.24374
1.86867	-0.68114	2.47306	-0.80637	-1.13464	-0.24237		-0.46392	0.234402	-0.3235	1.59991	-0.07068		-0.52224	0.583554	-0.01291	0.451671	0.124016		1.02373	1.32217	-1.77211	0.385249	-0.19403
1.87679	-0.63148	2.43673	-0.76595	-1.13458	-0.21972		-0.48105	0.118866	-0.30323	1.48334	-0.11183		-0.53053	0.526257	-0.01119	0.409474	0.046883		0.972503	1.22744	-1.81667	0.338186	-0.21452
1.88499	-0.58206	2.36232	-0.76623	-1.15427	-0.14771		-0.51192	0.082501	-0.31148	1.3766	-0.10861		-0.50042	0.491117	0.013126	0.313643	-0.06238		0.953758	1.14477	-1.84681	0.248425	-0.30725
1.8932	-0.54621	2.24467	-0.80505	-1.19655	-0.02537		-0.53753	0.114753	-0.35341	1.25821	-0.08199		-0.45279	0.505631	0.053792	0.174367	-0.16578		0.96283	1.06828	-1.85923	0.128218	-0.4224
1.9014	-0.54193	2.08908	-0.85536	-1.23719	0.145179		-0.53877	0.179497	-0.41815	1.13123	-0.05998		-0.42848	0.551791	0.102123	0.00325	-0.23648		0.976134	0.997189	-1.84377	0.024652	-0.49077
1.9096	-0.575	1.91805	-0.88332	-1.27038	0.361449		-0.51211	0.24222	-0.48154	1.00982	-0.05541		-0.44811	0.594122	0.137841	-0.16611	-0.272		0.977167	0.922	-1.79341	-0.01728	-0.48007
1.91781	-0.63923	1.75453	-0.87827	-1.30806	0.620734		-0.47941	0.289365	-0.52409	0.87441	-0.07596		-0.50186	0.599673	0.137326	-0.30207	-0.2835		0.967974	0.82158	-1.72016	0.001166	-0.40303
1.92601	-0.71068	1.61282	-0.84807	-1.37564	0.898347		-0.46256	0.325993	-0.52988	0.700606	-0.12507		-0.54941	0.557706	0.101849	-0.36726	-0.29043		0.973678	0.690681	-1.65353	0.021585	-0.30245
1.93421	-0.75775	1.5072	-0.80371	-1.47434	1.14439		-0.46819	0.353672	-0.50504	0.515804	-0.19808		-0.56534	0.492714	0.052236	-0.35867	-0.29904		1.01077	0.555036	-1.61903	0.020529	-0.21586
1.94242	-0.77118	1.44511	-0.75495	-1.54774	1.30121		-0.49059	0.349164	-0.47656	0.36717	-0.26911		-0.55031	0.437838	0.014517	-0.31184	-0.31334		1.06884	0.467971	-1.59755	0.01203	-0.16075
1.95062	-0.76307	1.42687	-0.71168	-1.54662	1.34244		-0.5208	0.304747	-0.46782	0.292955	-0.29942		-0.52988	0.42137	-0.00372	-0.25878	-0.33821		1.10109	0.454953	-1.56059	0.008137	-0.14852
1.95882	-0.75478	1.42665	-0.68872	-1.46445	1.30593		-0.5629	0.236553	-0.48993	0.264158	-0.27855		-0.53444	0.430195	-0.01575	-0.22707	-0.36691		1.07411	0.486877	-1.50525	0.014672	-0.1732
1.96694	-0.74669	1.41335	-0.69233	-1.36565	1.25574		-0.61145	0.168381	-0.52996	0.202141	-0.23052		-0.58015	0.417665	-0.04325	-0.22779	-0.3776		1.00647	0.504476	-1.44945	-0.0002	-0.21755
1.97515	-0.7285	1.38025	-0.7206	-1.3371	1.23473		-0.65083	0.11193	-0.56078	0.065528	-0.19953		-0.66623	0.350536	-0.08988	-0.27202	-0.34279		0.944615	0.470321	-1.41813	-0.0625	-0.25648
1.98335	-0.7082	1.34336	-0.75824	-1.4199	1.24055		-0.66004	0.0603	-0.55341	-0.121	-0.21679		-0.76667	0.24462	-0.13791	-0.34948	-0.26736		0.926081	0.398452	-1.41651	-0.16754	-0.26928
1.99155	-0.70392	1.32182	-0.78356	-1.57038	1.24859		-0.63597	0.020733	-0.50778	-0.28562	-0.26533		-0.84707	0.153109	-0.17316	-0.4131	-0.17758		0.936342	0.329421	-1.44285	-0.27008	-0.25513
1.99976	-0.7332	1.31425	-0.79271	-1.68904	1.23089		-0.59629	0.005963	-0.45622	-0.3694	-0.30947		-0.88235	0.1025	-0.19026	-0.43018	-0.09662		0.938585	0.302593	-1.49323	-0.31565	-0.22752
2.00796	-0.7811	1.30174	-0.79513	-1.71999	1.17521		-0.56591	0.012083	-0.43989	-0.3725	-0.31681		-0.85999	0.081495	-0.20127	-0.40337	-0.02444		0.924121	0.327989	-1.56209	-0.28806	-0.20466
2.01616	-0.81485	1.25027	-0.80785	-1.68476	1.08797		-0.56454	0.006926	-0.47729	-0.33254	-0.2868		-0.80048	0.058826	-0.21151	-0.37749	0.041245		0.911921	0.393976	-1.63231	-0.19402	-0.19182
2.02437	-0.81836	1.14608	-0.82981	-1.65996	0.992322		-0.58547	-0.04099	-0.54351	-0.27364	-0.25094		-0.74472	0.017443	-0.21071	-0.38468	0.0821		0.920696	0.472057	-1.67608	-0.07034	-0.1893
2.03257	-0.80171	1.00923	-0.83253	-1.69555	0.909823		-0.60856	-0.10877	-0.59623	-0.17826	-0.24867		-0.73083	-0.03932	-0.20081	-0.42039	0.079066		0.945216	0.51923	-1.67855	0.056383	-0.196
2.04077	-0.79405	0.880252	-0.78984	-1.77798	0.838501		-0.61111	-0.15414	-0.60009	-0.05724	-0.29533		-0.76744	-0.09378	-0.19812	-0.46056	0.02417		0.973699	0.509711	-1.64554	0.168413	-0.19938
2.04898	-0.80956	0.812022	-0.69821	-1.86011	0.759388		-0.58812	-0.16218	-0.54855	0.033723	-0.36342		-0.83646	-0.11913	-0.22169	-0.47945	-0.06807		0.994823	0.446358	-1.60294	0.247908	-0.18752
2.05714	-0.84811	0.818863	-0.57981	-1.8993	0.662153		-0.55582	-0.16057	-0.46305	0.035899	-0.41914		-0.90232	-0.09485	-0.26175	-0.45681	-0.18709		1.00679	0.384246	-1.57551	0.300701	-0.15725
2.0653	-0.89108	0.879333	-0.44644	-1.89661	0.565819		-0.53593	-0.1806	-0.37582	-0.05873	-0.4504		-0.93553	-0.01913	-0.28694	-0.3778	-0.32751		1.01372	0.373868	-1.57164	0.352048	-0.12545
2.0735	-0.91729	0.949029	-0.30664	-1.84675	0.509737		-0.55719	-0.21014	-0.31384	-0.18607	-0.48063		-0.93601	0.068476	-0.27309	-0.28221	-0.46735		1.01877	0.426996	-1.5844	0.419059	-0.1135
2.08171	-0.91921	0.994927	-0.17854	-1.74358	0.50101		-0.62644	-0.22156	-0.27371	-0.29487	-0.54259		-0.91339	0.125576	-0.2186	-0.24208	-0.57815		1.02677	0.508978	-1.60331	0.484738	-0.13197
2.08991	-0.90909	1.01342	-0.09454	-1.59314	0.510452		-0.72153	-0.2002	-0.24227	-0.39248	-0.6344		-0.88232	0.132716	-0.14052	-0.29827	-0.61951		1.023	0.561618	-1.62729	0.53899	-0.16412
2.09811	-0.91053	1.00182	-0.07481	-1.41228	0.493066		-0.80261	-0.14659	-0.20807	-0.49955	-0.71627		-0.85392	0.097248	-0.05183	-0.40482	-0.5753		0.991228	0.554488	-1.65793	0.603785	-0.18095
2.10631	-0.93085	0.96347	-0.10118	-1.24867	0.426104		-0.83411	-0.05189	-0.17507	-0.58177	-0.74503		-0.83736	0.048572	0.031322	-0.4461	-0.46431		0.934686	0.487167	-1.70089	0.704503	-0.17148
2.11452	-0.96355	0.893271	-0.14383	-1.15835	0.326736		-0.81524	0.094426	-0.16183	-0.58574	-0.72312		-0.82665	-0.00115	0.083992	-0.36891	-0.32657		0.891823	0.394544	-1.75411	0.827202	-0.14369
2.12272	-0.99274	0.796173	-0.19294	-1.2024	0.223199		-0.76347	0.278775	-0.17165	-0.50681	-0.69151		-0.79631	-0.04762	0.080842	-0.23858	-0.20903		0.906776	0.307036	-1.80591	0.909579	-0.11473
2.13093	-1.00345	0.699491	-0.24801	-1.38603	0.134657		-0.69919	0.463781	-0.19872	-0.39819	-0.69637		-0.73513	-0.08211	0.019975	-0.18153	-0.12863		0.972907	0.24526	-1.84935	0.908844	-0.0919
2.13913	-0.99589	0.644024	-0.29288	-1.64496	0.05616		-0.63701	0.61399	-0.23262	-0.33623	-0.74087		-0.65564	-0.09861	-0.07666	-0.25553	-0.07681		1.04689	0.206649	-1.88098	0.81171	-0.07594
2.14733	-0.98805	0.645775	-0.30217	-1.89524	-0.01298		-0.58931	0.721853	-0.2677	-0.33756	-0.78393		-0.59698	-0.09735	-0.18319	-0.40632	-0.03741		1.07836	0.175583	-1.91328	0.651916	-0.073
2.15545	-1.01077	0.675962	-0.27985	-2.06817	-0.05553		-0.56879	0.792993	-0.29882	-0.36427	-0.79373		-0.58199	-0.09129	-0.27847	-0.54825	-0.01824		1.05523	0.155733	-1.94662	0.511359	-0.09087
2.16365	-1.05877	0.688543	-0.26133	-2.16824	-0.05898		-0.57253	0.832363	-0.3124	-0.3807	-0.7683		-0.59293	-0.08895	-0.3543	-0.61475	-0.04243		1.00107	0.16139	-1.96702	0.48042	-0.14422
2.17186	-1.09282	0.659501	-0.28507	-2.23805	-0.04211		-0.58805	0.841064	-0.30326	-0.39148	-0.73853		-0.60463	-0.08721	-0.40848	-0.61418	-0.10756		0.948273	0.192073	-1.96121	0.612927	-0.22567
2.18006	-1.08591	0.609461	-0.34947	-2.30307	-0.04669		-0.60679	0.813356	-0.2751	-0.41421	-0.73132		-0.60072	-0.07947	-0.44743	-0.59744	-0.18189		0.927879	0.214392	-1.9249	0.845301	-0.30087
2.18826	-1.0581	0.58292	-0.42296	-2.35391	-0.09937		-0.64082	0.757007	-0.24534	-0.43092	-0.75104		-0.58799	-0.06682	-0.48499	-0.60027	-0.23258		0.945634	0.190581	-1.87636	1.04342	-0.33209
2.19647	-1.06316	0.601058	-0.49584	-2.37059	-0.18956		-0.70192	0.678201	-0.22789	-0.43257	-0.79439		-0.57411	-0.06138	-0.52454	-0.61932	-0.26351		0.986522	0.113299	-1.83169	1.11229	-0.29908
2.20467	-1.11556	0.652317	-0.57474	-2.34656	-0.26977		-0.77473	0.592051	-0.21231	-0.41082	-0.83715		-0.55931	-0.06268	-0.56128	-0.62691	-0.29599		1.02754	0.012945	-1.79639	1.05366	-0.22223
2.21287	-1.18039	0.719781	-0.66629	-2.27676	-0.30257		-0.8221	0.514193	-0.1675	-0.35946	-0.84626		-0.54613	-0.06174	-0.5793	-0.62504	-0.33924		1.05391	-0.07343	-1.77105	0.94154	-0.14015
2.22108	-1.20768	0.80696	-0.75355	-2.16996	-0.28613		-0.81379	0.438706	-0.07009	-0.29549	-0.77993		-0.53888	-0.04829	-0.5754	-0.64209	-0.38171		1.06577	-0.13587	-1.76205	0.834874	-0.09422
2.22928	-1.18038	0.915355	-0.80967	-2.03749	-0.23165		-0.76913	0.348698	0.065742	-0.23454	-0.61297		-0.54215	-0.02106	-0.57062	-0.69526	-0.4053		1.06556	-0.18336	-1.77489	0.766415	-0.10548
2.23748	-1.12352	1.02638	-0.82388	-1.90736	-0.15331		-0.74078	0.244416	0.194199	-0.19836	-0.36001		-0.54928	0.015095	-0.58777	-0.74485	-0.40054		1.05797	-0.21864	-1.7923	0.743033	-0.16725
2.2456	-1.06314	1.11075	-0.81003	-1.81134	-0.06303		-0.77219	0.154808	0.260973	-0.18965	-0.06888		-0.55758	0.042679	-0.6392	-0.72987	-0.35792		1.04118	-0.23193	-1.78995	0.75152	-0.25476
2.25381	-1.0142	1.14502	-0.80087	-1.76008	0.018544		-0.85737	0.09835	0.248513	-0.17644	0.195529		-0.56924	0.041373	-0.71111	-0.64234	-0.28673		1.02086	-0.21952	-1.75299	0.763843	-0.32177
2.26201	-0.98243	1.13745	-0.81529	-1.78022	0.078217		-0.94552	0.06418	0.186364	-0.10719	0.388337		-0.58056	0.016357	-0.78499	-0.52165	-0.21709		1.00634	-0.21253	-1.6925	0.745812	-0.32428
2.27021	-0.96313	1.10342	-0.8501	-1.87933	0.125984		-0.99096	0.032052	0.123579	0.036696	0.495034		-0.58556	-0.01465	-0.84895	-0.4159	-0.18245		1.00162	-0.24472	-1.62934	0.691216	-0.26612
2.27842	-0.94202	1.05614	-0.88912	-2.03346	0.182006		-0.97079	-0.01197	0.091028	0.209893	0.529734		-0.5829	-0.02324	-0.89804	-0.34255	-0.18691		0.993266	-0.3159	-1.57515	0.622493	-0.19928
2.28662	-0.916	1.01155	-0.91767	-2.16331	0.276173		-0.90183	-0.0486	0.080924	0.353866	0.511141		-0.58827	-0.00529	-0.93448	-0.32199	-0.18182		0.958209	-0.38854	-1.53025	0.56885	-0.17026
2.29482	-0.90307	0.996378	-0.93745	-2.18847	0.42079		-0.8187	-0.04761	0.080891	0.419913	0.445691		-0.61751	0.008079	-0.96009	-0.37148	-0.12057		0.895263	-0.42176	-1.48559	0.531721	-0.17503
2.30303	-0.90828	1.04083	-0.95806	-2.11591	0.615089		-0.75421	-0.01026	0.091154	0.391247	0.338569		-0.68074	-0.01055	-0.98314	-0.4795	0.002231		0.819203	-0.40983	-1.43333	0.490664	-0.18057
2.31123	-0.91601	1.13754	-0.98122	-2.0252	0.833857		-0.74035	0.023205	0.117727	0.287628	0.210298		-0.76266	-0.06413	-1.00803	-0.6075	0.14384		0.752549	-0.37419	-1.36079	0.433771	-0.17085
2.31943	-0.90594	1.24364	-0.99126	-1.99655	1.03232		-0.78405	0.021506	0.158338	0.158601	0.100944		-0.83279	-0.1233	-1.02848	-0.68253	0.256315		0.701357	-0.35326	-1.262	0.360466	-0.17614
2.32764	-0.87481	1.3185	-0.97825	-1.99609	1.183		-0.87099	-0.01497	0.190238	0.065849	0.05341		-0.87699	-0.16333	-1.02013	-0.67489	0.33688		0.65146	-0.37805	-1.13922	0.287552	-0.22401
2.33576	-0.84212	1.35773	-0.95237	-1.9263	1.29422		-0.97528	-0.06611	0.200905	0.048538	0.072917		-0.8933	-0.1803	-0.95592	-0.61043	0.414317		0.59438	-0.44262	-0.99369	0.216073	-0.29524
2.34396	-0.82967	1.40112	-0.93101	-1.74425	1.39703		-1.06659	-0.10945	0.19816	0.116642	0.114561		-0.89221	-0.18101	-0.83519	-0.53466	0.528448		0.537032	-0.51631	-0.83768	0.135131	-0.34422
2.35216	-0.84936	1.47924	-0.91781	-1.49076	1.49726		-1.1135	-0.15306	0.202905	0.249308	0.113838		-0.87714	-0.17788	-0.69169	-0.47523	0.686132		0.494834	-0.56027	-0.6794	0.031393	-0.34463
2.36037	-0.88524	1.57988	-0.88612	-1.24215	1.57003		-1.09735	-0.21889	0.22452	0.421542	0.046864		-0.85013	-0.16913	-0.57777	-0.40209	0.866807		0.4626	-0.55883	-0.53762	-0.07609	-0.32066
2.36857	-0.91487	1.65654	-0.81151	-1.02435	1.59625		-1.03667	-0.30509	0.248305	0.587392	-0.06965		-0.82627	-0.15136	-0.51493	-0.26216	1.04066		0.423084	-0.52843	-0.42068	-0.12685	-0.29623
2.37677	-0.91417	1.68539	-0.69639	-0.8338	1.58426		-0.96822	-0.37686	0.25562	0.691831	-0.19802		-0.82422	-0.11502	-0.49438	-0.01387	1.18383		0.381467	-0.49914	-0.30372	-0.09792	-0.27039
2.38498	-0.87329	1.69369	-0.57998	-0.67407	1.56035		-0.92487	-0.40085	0.241363	0.735633	-0.31691		-0.85687	-0.05783	-0.48843	0.281374	1.28903		0.356826	-0.48458	-0.1532	-0.00671	-0.22923
2.39318	-0.82165	1.73218	-0.50118	-0.55838	1.53752		-0.9206	-0.39103	0.222093	0.749627	-0.42295		-0.90272	-0.00229	-0.47127	0.489004	1.35221		0.374666	-0.4779	0.043717	0.116825	-0.16838
2.40138	-0.80476	1.81608	-0.46837	-0.48236	1.52405		-0.95622	-0.3763	0.224367	0.771433	-0.50743		-0.93252	0.01093	-0.44086	0.525981	1.37007		0.434973	-0.48983	0.256397	0.27802	-0.11003
2.40959	-0.84572	1.90606	-0.47107	-0.41652	1.51946		-1.02093	-0.38333	0.265871	0.803178	-0.56773		-0.94545	-0.04583	-0.40269	0.432778	1.34032		0.5007	-0.53362	0.43143	0.506444	-0.07703
2.41779	-0.91939	1.94423	-0.49021	-0.34502	1.51262		-1.08857	-0.41117	0.349904	0.820799	-0.6065		-0.96287	-0.14454	-0.37098	0.343581	1.27757		0.530019	-0.60964	0.535766	0.784951	-0.08583
2.42591	-0.98092	1.90934	-0.51864	-0.27163	1.47796		-1.12019	-0.43751	0.466702	0.826779	-0.63562		-0.99961	-0.22236	-0.36006	0.33527	1.20776		0.517493	-0.68104	0.57175	1.05252	-0.1398
2.43411	-1.00933	1.83586	-0.55742	-0.2218	1.39522		-1.07554	-0.4494	0.603553	0.847991	-0.66324		-1.03431	-0.22794	-0.37065	0.361749	1.15111		0.499342	-0.69901	0.567206	1.239	-0.23804
2.44232	-1.00813	1.77426	-0.59914	-0.21596	1.28258		-0.95598	-0.44582	0.751401	0.907582	-0.68137		-1.05053	-0.16979	-0.39073	0.336245	1.11888		0.4992	-0.64685	0.543498	1.32121	-0.36458
2.45052	-0.99983	1.74469	-0.6287	-0.26704	1.16928		-0.80408	-0.43175	0.899655	0.9742	-0.6737		-1.0583	-0.09711	-0.40184	0.244302	1.09849		0.515802	-0.55368	0.504182	1.32058	-0.46816
2.45872	-1.00221	1.73266	-0.6283	-0.37161	1.0691		-0.6739	-0.40827	1.04046	0.994448	-0.62636		-1.08209	-0.04791	-0.40924	0.141563	1.073		0.529495	-0.47603	0.43997	1.25865	-0.49705
2.46692	-1.02237	1.70234	-0.59904	-0.48591	0.968237		-0.60421	-0.38403	1.15861	0.960242	-0.54541		-1.11799	-0.02136	-0.42445	0.072412	1.02729		0.529297	-0.43839	0.344242	1.15965	-0.43666
2.47513	-1.05703	1.64261	-0.56132	-0.56226	0.850832		-0.59073	-0.37161	1.24601	0.888749	-0.44536		-1.13373	0.01961	-0.45546	0.044543	0.943694		0.518314	-0.43237	0.2299	1.03648	-0.32433
2.48333	-1.09766	1.5611	-0.54134	-0.57432	0.741259		-0.60994	-0.36742	1.29945	0.801121	-0.3456		-1.11203	0.090465	-0.50086	0.025044	0.813204		0.49649	-0.42821	0.125096	0.901253	-0.21953
2.49153	-1.13826	1.4711	-0.55535	-0.53755	0.679393		-0.63645	-0.37073	1.32409	0.697859	-0.27724		-1.07005	0.173946	-0.54912	-0.01273	0.644587		0.45575	-0.40186	0.050906	0.755333	-0.16197
2.49974	-1.16778	1.38518	-0.59132	-0.47663	0.684343		-0.66656	-0.38608	1.31705	0.56668	-0.27693		-1.04564	0.245116	-0.5907	-0.08608	0.48424		0.396342	-0.36106	-0.00529	0.626272	-0.15753
2.50794	-1.17365	1.30714	-0.62721	-0.38691	0.716651		-0.70801	-0.41991	1.28236	0.406407	-0.38637		-1.05122	0.280059	-0.61679	-0.20568	0.374078		0.347606	-0.31364	-0.06751	0.541873	-0.18797
2.51606	-1.13839	1.23628	-0.64993	-0.26409	0.711642		-0.75195	-0.46731	1.24112	0.256715	-0.60897		-1.07791	0.276055	-0.62825	-0.33423	0.324549		0.33951	-0.2573	-0.15254	0.50216	-0.2345
2.52427	-1.06798	1.16245	-0.66152	-0.10131	0.639757		-0.77493	-0.51814	1.21022	0.175258	-0.89692		-1.11403	0.236408	-0.63478	-0.41331	0.308872		0.380406	-0.18059	-0.25574	0.472565	-0.27698
2.53247	-0.99254	1.07835	-0.66987	0.070653	0.524161		-0.75756	-0.55635	1.1961	0.178588	-1.16266		-1.15161	0.181072	-0.64523	-0.40138	0.286079		0.451065	-0.09679	-0.3553	0.394207	-0.30459
2.54067	-0.94306	0.992141	-0.67269	0.195614	0.428662		-0.70478	-0.57646	1.18492	0.237216	-1.33701		-1.18648	0.144845	-0.65877	-0.32157	0.239168		0.509709	-0.0478	-0.43304	0.268338	-0.32056
2.54887	-0.92538	0.917886	-0.65798	0.232935	0.399024		-0.64197	-0.59095	1.1619	0.285762	-1.40206		-1.21384	0.157602	-0.67137	-0.2389	0.172756		0.534909	-0.05987	-0.47647	0.152381	-0.33656
2.55708	-0.91295	0.863907	-0.61372	0.158256	0.431789		-0.59469	-0.60945	1.12667	0.277546	-1.37661		-1.23875	0.224279	-0.68046	-0.20234	0.096247		0.524768	-0.1162	-0.48717	0.091548	-0.36048
2.56528	-0.89065	0.816784	-0.54696	0.008814	0.493391		-0.5788	-0.64413	1.08747	0.205185	-1.3007		-1.26983	0.324848	-0.68177	-0.23306	0.013197		0.494133	-0.1613	-0.46613	0.058255	-0.37669
2.57348	-0.86589	0.766036	-0.47438	-0.13126	0.544788		-0.59314	-0.70378	1.05133	0.098926	-1.19986		-1.30478	0.464423	-0.67651	-0.29431	-0.0721		0.459295	-0.15403	-0.41568	-0.02276	-0.3741
2.58169	-0.8565	0.716908	-0.42292	-0.18803	0.567309		-0.628	-0.77807	1.01253	0.001027	-1.09401		-1.33577	0.671397	-0.66081	-0.33338	-0.14793		0.4237	-0.08366	-0.34497	-0.16709	-0.35431
2.58989	-0.86231	0.672301	-0.41098	-0.16023	0.563135		-0.66293	-0.84569	0.965158	-0.07515	-0.99607		-1.34754	0.949562	-0.62866	-0.32116	-0.20586		0.400779	0.029052	-0.25965	-0.30686	-0.33477
2.59809	-0.85891	0.625915	-0.43374	-0.10446	0.550996		-0.68305	-0.87978	0.902	-0.12168	-0.90863		-1.33787	1.24657	-0.58788	-0.27574	-0.24084		0.406865	0.158314	-0.17605	-0.34866	-0.33348
2.6063	-0.83408	0.560478	-0.47488	-0.07256	0.521425		-0.68835	-0.87811	0.819742	-0.15027	-0.84472		-1.31616	1.48018	-0.54959	-0.2456	-0.25933		0.45534	0.270517	-0.1057	-0.27372	-0.34987
2.61442	-0.79441	0.473226	-0.51537	-0.08488	0.454556		-0.67278	-0.84634	0.723754	-0.16587	-0.80473		-1.30331	1.60481	-0.52804	-0.24787	-0.27041		0.529438	0.321684	-0.05461	-0.16592	-0.38162
2.62262	-0.76796	0.373007	-0.55559	-0.12521	0.351941		-0.63029	-0.78564	0.62799	-0.1524	-0.76995		-1.31963	1.62658	-0.52815	-0.26381	-0.27535		0.589285	0.288961	-0.02543	-0.12206	-0.42674
2.63082	-0.7835	0.276354	-0.60009	-0.1889	0.238637		-0.56328	-0.70764	0.535256	-0.08714	-0.70619		-1.36941	1.57715	-0.54882	-0.26427	-0.26597		0.609729	0.192898	-0.02199	-0.18508	-0.48324
2.63903	-0.83951	0.193464	-0.63981	-0.27103	0.154376		-0.49391	-0.63806	0.441783	0.046255	-0.59535		-1.43272	1.46737	-0.58639	-0.24591	-0.22594		0.601973	0.092439	-0.05147	-0.30997	-0.54928
2.64723	-0.91298	0.132235	-0.66099	-0.3623	0.122525		-0.43997	-0.62008	0.352096	0.213341	-0.46294		-1.47737	1.30348	-0.63518	-0.22306	-0.15334		0.606071	0.030181	-0.10014	-0.42508	-0.61143
2.65543	-0.97305	0.101347	-0.65578	-0.44722	0.146179		-0.4156	-0.66377	0.277394	0.365542	-0.3565		-1.48264	1.11342	-0.69377	-0.19694	-0.05294		0.64715	0.001036	-0.12968	-0.50415	-0.65429
2.66364	-1.00749	0.095739	-0.64121	-0.49784	0.206131		-0.43162	-0.73304	0.231879	0.491442	-0.30791		-1.45083	0.944413	-0.75464	-0.16933	0.052721		0.715892	-0.0233	-0.09526	-0.55699	-0.66162
2.67184	-1.01718	0.110165	-0.63958	-0.48184	0.284707		-0.48714	-0.78072	0.219008	0.624654	-0.30323		-1.40263	0.841626	-0.80601	-0.14863	0.136704		0.775491	-0.06318	0.017105	-0.59478	-0.62987
2.68004	-1.01145	0.138719	-0.66742	-0.37452	0.36451		-0.57095	-0.79001	0.22429	0.798791	-0.3195		-1.36463	0.806377	-0.8305	-0.14014	0.184537		0.796919	-0.109	0.180532	-0.59383	-0.56709
2.68825	-1.00705	0.1987	-0.7187	-0.21681	0.411773		-0.64447	-0.78465	0.232224	0.974533	-0.36284		-1.35551	0.814064	-0.80702	-0.09698	0.199226		0.781924	-0.14468	0.351281	-0.518	-0.49628
2.69645	-1.01258	0.333345	-0.76366	-0.08856	0.410911		-0.67522	-0.78755	0.228197	1.06965	-0.44832		-1.38202	0.830277	-0.73395	0.018207	0.202732		0.75291	-0.17819	0.514033	-0.35796	-0.44799
2.70457	-1.02893	0.577858	-0.77609	-0.04054	0.371732		-0.6695	-0.79644	0.211529	1.02957	-0.56833		-1.42426	0.829584	-0.63431	0.170003	0.198133		0.734504	-0.23529	0.700602	-0.16291	-0.44564
2.71277	-1.04562	0.94954	-0.73949	-0.05854	0.318453		-0.6684	-0.80199	0.191991	0.889105	-0.68628		-1.45495	0.81801	-0.54365	0.266155	0.177513		0.736832	-0.33602	0.943509	-0.00391	-0.50158
2.72098	-1.05318	1.41549	-0.66983	-0.07163	0.27131		-0.70673	-0.80969	0.179608	0.7292	-0.76995		-1.45969	0.795429	-0.47694	0.233399	0.137446		0.748614	-0.46439	1.25118	0.061425	-0.59541
2.72918	-1.04978	1.91414	-0.59676	-0.05072	0.235914		-0.76396	-0.83358	0.175225	0.593741	-0.80915		-1.44663	0.756621	-0.42288	0.103326	0.088004		0.743859	-0.57472	1.58747	-0.00794	-0.68158
2.73738	-1.03983	2.4002	-0.53179	-0.02477	0.215023		-0.79581	-0.87183	0.162141	0.48363	-0.82764		-1.44016	0.699848	-0.36275	-0.03391	0.051137		0.716947	-0.62209	1.89904	-0.17878	-0.70822
2.74559	-1.02344	2.87481	-0.45552	-0.02357	0.212783		-0.78338	-0.89869	0.128998	0.385814	-0.85441		-1.44772	0.628161	-0.30113	-0.09834	0.025336		0.700876	-0.59363	2.14926	-0.34108	-0.65457
2.75379	-1.00166	3.36494	-0.34906	-0.04389	0.254122		-0.7516	-0.86833	0.08585	0.334248	-0.89742		-1.47187	0.546299	-0.25796	-0.08691	-0.00932		0.72028	-0.52241	2.32659	-0.37516	-0.5481
2.76199	-0.99974	3.85057	-0.22347	-0.06112	0.351543		-0.73753	-0.75417	0.055079	0.359109	-0.94535		-1.50398	0.452272	-0.2415	-0.05719	-0.06873		0.772753	-0.44457	2.45648	-0.26173	-0.44504
2.77019	-1.03592	4.27634	-0.10663	-0.08421	0.472976		-0.75399	-0.56442	0.049151	0.453953	-0.97547		-1.53758	0.352082	-0.25088	-0.04132	-0.14127		0.825756	-0.38142	2.58359	-0.08841	-0.3997
2.7784	-1.10401	4.55564	-0.02602	-0.11818	0.561816		-0.79205	-0.34924	0.053863	0.571186	-0.97595		-1.57207	0.259535	-0.27441	-0.04921	-0.20509		0.858004	-0.33174	2.74474	0.041476	-0.41793
2.7866	-1.16463	4.64952	0.010074	-0.14241	0.586743		-0.8259	-0.1698	0.053255	0.661215	-0.94444		-1.59699	0.192734	-0.29894	-0.06081	-0.255		0.886077	-0.2965	2.95698	0.086931	-0.46553
2.79472	-1.16734	4.57761	0.005959	-0.12005	0.57583		-0.83169	-0.04363	0.044061	0.724135	-0.89244		-1.60625	0.149615	-0.31389	-0.05846	-0.29518		0.933582	-0.29169	3.20621	0.087988	-0.49779
2.80293	-1.10242	4.39495	-0.02815	-0.03575	0.582138		-0.80564	0.038339	0.031815	0.778127	-0.83777		-1.5963	0.106941	-0.31097	-0.06787	-0.32884		1.00017	-0.32334	3.45657	0.084141	-0.49248
2.81113	-0.99985	4.17286	-0.07264	0.071901	0.631634		-0.76379	0.101887	0.016654	0.843758	-0.78526		-1.57324	0.056449	-0.30223	-0.12194	-0.34812		1.05765	-0.36918	3.66913	0.079088	-0.4636
2.81933	-0.90095	3.9765	-0.11233	0.132004	0.689823		-0.72122	0.13893	-0.01396	0.907499	-0.74381		-1.54013	0.02586	-0.30809	-0.2133	-0.3486		1.08801	-0.38476	3.7987	0.090583	-0.43648
2.82754	-0.82958	3.8476	-0.14025	0.104871	0.700855		-0.67848	0.114891	-0.06643	0.933989	-0.71913		-1.50163	0.042475	-0.3459	-0.28982	-0.3356		1.09746	-0.34824	3.83972	0.121293	-0.42741
2.83574	-0.7907	3.77135	-0.16246	0.033664	0.645919		-0.63322	0.028004	-0.12305	0.921219	-0.70958		-1.47684	0.089211	-0.40895	-0.3192	-0.31337		1.10064	-0.27486	3.83235	0.141092	-0.42932
2.84394	-0.77598	3.70198	-0.1827	-0.00047	0.552235		-0.57726	-0.07356	-0.15307	0.884884	-0.7107		-1.481	0.12263	-0.46871	-0.30701	-0.28071		1.10912	-0.20714	3.84344	0.098611	-0.42153
2.85214	-0.77032	3.6072	-0.19301	0.050155	0.469782		-0.51491	-0.12387	-0.14822	0.855196	-0.72028		-1.51429	0.122163	-0.50287	-0.28714	-0.23249		1.11929	-0.17535	3.91708	0.007287	-0.39445
2.86035	-0.77614	3.47939	-0.19042	0.157578	0.423328		-0.45187	-0.11835	-0.12804	0.832261	-0.74082		-1.55428	0.128559	-0.50179	-0.28475	-0.18196		1.11967	-0.17509	4.04784	-0.05271	-0.35228
2.86855	-0.78901	3.3347	-0.18086	0.239582	0.396447		-0.38517	-0.10631	-0.12117	0.785296	-0.76477		-1.57492	0.230573	-0.48368	-0.29323	-0.14578		1.09959	-0.18181	4.19496	-0.00189	-0.31418
2.87675	-0.79514	3.18766	-0.18249	0.247191	0.357897		-0.31589	-0.13067	-0.13871	0.694756	-0.78788		-1.56502	0.480913	-0.47277	-0.31314	-0.13783		1.06214	-0.15867	4.30774	0.155275	-0.29745
2.88488	-0.78821	3.05883	-0.20946	0.185614	0.289094		-0.24371	-0.19165	-0.16854	0.562316	-0.8109		-1.54035	0.856614	-0.47573	-0.35174	-0.15851		1.02046	-0.09503	4.34748	0.326254	-0.30757
2.89308	-0.78188	2.95819	-0.26227	0.091329	0.20521		-0.17776	-0.24673	-0.20084	0.422113	-0.84087		-1.53701	1.26425	-0.47832	-0.40394	-0.19553		0.984442	-0.00644	4.29026	0.429786	-0.3243
2.90128	-0.80381	2.8717	-0.3305	-0.00347	0.131225		-0.1195	-0.27382	-0.23006	0.302169	-0.88182		-1.58097	1.61566	-0.45732	-0.4383	-0.24653		0.958952	0.088907	4.14195	0.462378	-0.32004
2.90948	-0.85892	2.77426	-0.3958	-0.0839	0.088004		-0.06124	-0.28398	-0.25772	0.217515	-0.92361		-1.66762	1.84679	-0.4053	-0.45469	-0.30306		0.938953	0.174329	3.93481	0.475964	-0.28817
2.91769	-0.91732	2.63909	-0.44318	-0.12591	0.075779		0.008319	-0.29985	-0.2838	0.163476	-0.94969		-1.75095	1.93661	-0.32903	-0.50263	-0.35457		0.921687	0.248812	3.72543	0.492215	-0.24089
2.92589	-0.94159	2.47672	-0.47061	-0.13314	0.08057		0.109991	-0.31862	-0.3042	0.123265	-0.94889		-1.77605	1.90737	-0.24107	-0.6063	-0.40387		0.900344	0.303788	3.55622	0.476355	-0.1978
2.93409	-0.94296	2.3194	-0.49413	-0.13317	0.090449		0.245691	-0.32384	-0.31988	0.087013	-0.93636		-1.7252	1.80023	-0.14543	-0.72653	-0.4655		0.881378	0.331032	3.42259	0.404256	-0.167
2.9423	-0.96144	2.18081	-0.52957	-0.17486	0.090674		0.394563	-0.31805	-0.32637	0.057265	-0.92745		-1.62473	1.67319	-0.04739	-0.78179	-0.55909		0.887712	0.320298	3.29562	0.287862	-0.15129
2.9505	-1.00549	2.05604	-0.58185	-0.28736	0.077634		0.510447	-0.32219	-0.32649	0.055327	-0.92883		-1.52998	1.57988	0.043568	-0.73897	-0.67926		0.932174	0.273917	3.14683	0.165255	-0.15518
2.9587	-1.0411	1.93683	-0.6449	-0.4331	0.070863		0.553015	-0.35322	-0.32488	0.086989	-0.93433		-1.47091	1.52714	0.126291	-0.65755	-0.79954		1.00772	0.208392	2.98633	0.070337	-0.17846
2.96691	-1.02526	1.83354	-0.7005	-0.53622	0.09402		0.533498	-0.39128	-0.32977	0.1496	-0.92874		-1.44633	1.49014	0.208499	-0.6257	-0.89052		1.07154	0.135909	2.82892	0.005013	-0.20596
2.97503	-0.96498	1.7511	-0.73823	-0.53174	0.157066		0.502166	-0.40897	-0.35042	0.217586	-0.90551		-1.44027	1.44115	0.306367	-0.69156	-0.94096		1.08686	0.064475	2.68243	-0.04231	-0.2095
2.98323	-0.89843	1.69192	-0.75664	-0.42814	0.25232		0.503348	-0.38432	-0.38314	0.249474	-0.86362		-1.44692	1.38014	0.420278	-0.80634	-0.9656		1.05495	-0.0043	2.5438	-0.08744	-0.18775
2.99143	-0.85889	1.65283	-0.76373	-0.30461	0.354134		0.517689	-0.30463	-0.42327	0.228762	-0.81376		-1.48016	1.32884	0.536122	-0.88374	-0.97033		1.00741	-0.06546	2.39881	-0.11508	-0.15618
2.99964	-0.85551	1.62207	-0.76436	-0.25155	0.42307		0.489773	-0.17665	-0.4593	0.179349	-0.77604		-1.5476	1.30665	0.637469	-0.88459	-0.94637		0.970303	-0.11299	2.25561	-0.11161	-0.12427
3.00784	-0.87083	1.58657	-0.75485	-0.30456	0.437965		0.399084	-0.01462	-0.48658	0.175794	-0.76828		-1.63793	1.30748	0.725348	-0.82512	-0.87691		0.929966	-0.13368	2.11507	-0.06922	-0.10087
3.01604	-0.89336	1.53394	-0.74169	-0.41425	0.399309		0.296404	0.144969	-0.50688	0.28437	-0.80333		-1.7108	1.30626	0.81503	-0.75203	-0.77475		0.871174	-0.12045	1.97578	0.015395	-0.08361
3.02425	-0.91494	1.45961	-0.73538	-0.50177	0.333474		0.249491	0.266442	-0.52344	0.513402	-0.86057		-1.72351	1.28645	0.910114	-0.68734	-0.67789		0.801965	-0.08982	1.83963	0.123544	-0.07342
3.03245	-0.93679	1.36665	-0.7582	-0.52141	0.282846		0.26528	0.330734	-0.53526	0.806959	-0.91022		-1.67206	1.23599	0.998646	-0.64799	-0.61566		0.747935	-0.06963	1.71863	0.232174	-0.06847
3.04065	-0.95998	1.2727	-0.82338	-0.49662	0.267122		0.297937	0.338363	-0.53505	1.08089	-0.92955		-1.58544	1.15303	1.0581	-0.65774	-0.57228		0.726896	-0.08254	1.62982	0.318479	-0.05589
3.04886	-0.98027	1.18723	-0.92379	-0.47073	0.269918		0.299184	0.315972	-0.52436	1.30092	-0.90987		-1.49815	1.03894	1.07088	-0.73945	-0.48622		0.725057	-0.12655	1.57399	0.349705	-0.02299
3.05706	-0.99605	1.11626	-1.03692	-0.45622	0.253082		0.268294	0.28647	-0.51799	1.46349	-0.84867		-1.42771	0.907865	1.05049	-0.87081	-0.31202		0.714548	-0.1822	1.53549	0.291858	0.029872
3.06518	-1.01237	1.05722	-1.12833	-0.42283	0.210981		0.226921	0.262781	-0.54135	1.59583	-0.7451		-1.381	0.79187	1.02395	-0.9726	-0.06366		0.681705	-0.23781	1.49418	0.140449	0.084963
3.07338	-1.0351	0.984169	-1.1832	-0.33977	0.159239		0.184223	0.242913	-0.5972	1.74171	-0.61229		-1.35931	0.720387	1.01251	-0.97531	0.19329		0.638772	-0.28972	1.44726	-0.04274	0.133254
3.08159	-1.05583	0.877619	-1.19619	-0.25479	0.109485		0.14118	0.211916	-0.6632	1.91736	-0.48091		-1.35724	0.693226	1.01253	-0.87582	0.386548		0.613593	-0.33481	1.39296	-0.1734	0.171212
3.08979	-1.06026	0.741282	-1.17876	-0.24098	0.065615		0.09704	0.162642	-0.71453	2.1057	-0.39695		-1.36921	0.670711	0.993791	-0.7513	0.494954		0.617223	-0.36277	1.33113	-0.20148	0.196346
3.09799	-1.0484	0.615733	-1.15663	-0.33026	0.018697		0.064052	0.107204	-0.73598	2.25269	-0.38621		-1.38778	0.621633	0.930727	-0.67377	0.534359		0.633004	-0.37745	1.2601	-0.15663	0.204312
3.1062	-1.03124	0.545315	-1.15059	-0.47558	-0.01372		0.048243	0.073771	-0.73015	2.31598	-0.43118		-1.42117	0.551288	0.822531	-0.66762	0.538825		0.63183	-0.4036	1.18021	-0.11409	0.194049
3.1144	-1.01859	0.522749	-1.16251	-0.59168	-0.00104		0.047009	0.064982	-0.70083	2.29222	-0.49355		-1.4715	0.483298	0.699301	-0.73016	0.514249		0.611336	-0.45784	1.10019	-0.12074	0.175457
3.1226	-0.99657	0.516834	-1.17194	-0.6417	0.06484		0.056278	0.057594	-0.65894	2.20959	-0.54361		-1.52414	0.437546	0.593855	-0.84004	0.446903		0.58201	-0.54123	1.02684	-0.15177	0.160004
3.13081	-0.94474	0.509817	-1.16652	-0.63583	0.148598		0.067157	0.036115	-0.62767	2.08859	-0.58169		-1.54748	0.399373	0.526117	-0.96322	0.326808		0.547781	-0.63335	0.966651	-0.15554	0.157222
3.13901	-0.85172	0.519795	-1.1574	-0.62321	0.192402		0.08796	0.021557	-0.62807	1.93886	-0.61134		-1.51833	0.353745	0.491489	-1.04708	0.160087		0.502279	-0.71468	0.927301	-0.13536	0.163707
3.14721	-0.73029	0.560565	-1.17157	-0.63651	0.171113		0.127106	0.047857	-0.6692	1.77592	-0.63241		-1.45694	0.308744	0.467957	-1.07402	-0.0202		0.451907	-0.78083	0.920124	-0.12249	0.170133
3.15541	-0.60782	0.613071	-1.21598	-0.6765	0.099725		0.18784	0.109866	-0.73437	1.61021	-0.63882		-1.39687	0.279133	0.439087	-1.057	-0.17357		0.428816	-0.82198	0.960046	-0.14274	0.176635
3.16353	-0.49411	0.656146	-1.26882	-0.72905	0.012654		0.258279	0.175296	-0.80118	1.4439	-0.64168		-1.36009	0.266427	0.402421	-1.01296	-0.26483		0.454759	-0.83314	1.04623	-0.17349	0.194328
3.17174	-0.38767	0.6937	-1.30003	-0.76672	-0.06761		0.315175	0.214644	-0.85626	1.27061	-0.67587		-1.3427	0.251447	0.369092	-0.96046	-0.2817		0.518689	-0.81699	1.17986	-0.18636	0.233919
3.17994	-0.27576	0.757292	-1.29756	-0.78736	-0.13706		0.347994	0.253999	-0.89681	1.10635	-0.7553		-1.33482	0.216846	0.338792	-0.89118	-0.24675		0.574226	-0.77899	1.36199	-0.21698	0.290042
3.18815	-0.1545	0.863266	-1.28227	-0.81247	-0.19292		0.369928	0.33325	-0.92905	1.00913	-0.86835		-1.33098	0.16068	0.306367	-0.82086	-0.20138		0.590014	-0.72204	1.58598	-0.31465	0.35254
3.19635	-0.03347	1.00174	-1.27706	-0.85318	-0.23398		0.402584	0.435563	-0.9543	1.00779	-0.98539		-1.32673	0.098517	0.273191	-0.78893	-0.18264		0.585535	-0.65997	1.831	-0.49275	0.405222
3.20455	0.077828	1.1605	-1.28373	-0.89377	-0.26178		0.443113	0.501218	-0.97496	1.08133	-1.0856		-1.33063	0.049221	0.251001	-0.83312	-0.19937		0.588542	-0.61671	2.05595	-0.68709	0.436765
3.21275	0.180293	1.33043	-1.28845	-0.90738	-0.28554		0.469353	0.492612	-0.99056	1.17122	-1.16894		-1.33948	0.019179	0.250343	-0.94864	-0.23135		0.608541	-0.59988	2.22508	-0.81139	0.452907
3.22096	0.29858	1.48326	-1.274	-0.88932	-0.31481		0.468009	0.448968	-0.99034	1.25427	-1.23247		-1.3369	0.012054	0.245357	-1.08548	-0.2453		0.63091	-0.59191	2.32699	-0.82432	0.454663
3.22916	0.444503	1.58187	-1.24499	-0.8651	-0.35339		0.445062	0.432952	-0.96029	1.34559	-1.27799		-1.31074	0.033234	0.201168	-1.17931	-0.2273		0.643011	-0.56496	2.36821	-0.74449	0.452878
3.23736	0.616387	1.61041	-1.22013	-0.88087	-0.39593		0.418185	0.462125	-0.89607	1.45356	-1.31026		-1.25109	0.084835	0.107306	-1.18616	-0.18958		0.644843	-0.51997	2.35875	-0.63032	0.464098
3.24557	0.786523	1.59213	-1.21963	-0.94189	-0.42861		0.393517	0.502823	-0.81558	1.56315	-1.33681		-1.15738	0.143314	-0.00437	-1.13221	-0.15223		0.636224	-0.48735	2.30108	-0.50818	0.492609
3.25369	0.91565	1.56482	-1.24028	-1.01854	-0.44934		0.378027	0.505456	-0.75215	1.6474	-1.35533		-1.04183	0.170883	-0.08847	-1.08361	-0.12415		0.621795	-0.49176	2.20994	-0.37722	0.516454
3.26189	0.98212	1.54377	-1.25255	-1.08768	-0.4507		0.385853	0.458894	-0.73646	1.73017	-1.35222		-0.93447	0.136247	-0.13788	-1.08289	-0.08506		0.603	-0.53068	2.11247	-0.24861	0.507643
3.27009	0.999104	1.51246	-1.23653	-1.14341	-0.43157		0.427421	0.381336	-0.7648	1.85689	-1.32647		-0.85412	0.042336	-0.17385	-1.11419	-0.02472		0.592477	-0.58406	2.0351	-0.15738	0.457433
3.2783	1.00779	1.46191	-1.20149	-1.19756	-0.39972		0.50075	0.29442	-0.80502	2.05948	-1.28837		-0.80706	-0.05964	-0.22393	-1.11768	0.045055		0.600671	-0.64753	1.99293	-0.12692	0.37831
3.2865	1.0424	1.38965	-1.18252	-1.23109	-0.36849		0.602065	0.216795	-0.81859	2.31983	-1.25219		-0.78453	-0.12537	-0.29513	-1.05211	0.103707		0.621717	-0.70629	1.98478	-0.12981	0.294177
3.2947	1.1036	1.30439	-1.20615	-1.21282	-0.35017		0.751151	0.157266	-0.78141	2.57263	-1.2177		-0.75794	-0.1482	-0.37152	-0.92685	0.149154		0.633662	-0.74076	1.99782	-0.13415	0.216978
3.30291	1.16711	1.21711	-1.26097	-1.13101	-0.33829		0.960212	0.114964	-0.71094	2.74818	-1.16594		-0.7019	-0.16727	-0.4358	-0.79648	0.205163		0.620507	-0.73822	2.00206	-0.1345	0.144369
3.31111	1.21137	1.14096	-1.3176	-1.03259	-0.3255		1.21442	0.078264	-0.64328	2.80513	-1.08142		-0.61698	-0.21814	-0.47557	-0.69818	0.279499		0.592243	-0.7052	1.96807	-0.15453	0.082134
3.31931	1.23135	1.09039	-1.35084	-0.97531	-0.31294		1.47589	0.038791	-0.61078	2.75533	-0.97776		-0.53944	-0.28782	-0.491	-0.63685	0.359481		0.567886	-0.66554	1.88013	-0.21387	0.042491
3.32752	1.22846	1.05647	-1.35635	-0.93741	-0.3189		1.70402	-0.00975	-0.62203	2.65327	-0.88273		-0.50692	-0.33388	-0.49121	-0.60402	0.425806		0.56785	-0.61797	1.76027	-0.29298	0.022372
3.33572	1.20779	1.01184	-1.34165	-0.86042	-0.37698		1.8843	-0.06539	-0.65863	2.54524	-0.80191		-0.53371	-0.31329	-0.48911	-0.55887	0.47831		0.591012	-0.5495	1.64761	-0.36723	-0.00556
3.34384	1.18143	0.936521	-1.31628	-0.72484	-0.50019		2.01997	-0.12271	-0.6955	2.42421	-0.71217		-0.5959	-0.23213	-0.4956	-0.47984	0.541376		0.618978	-0.46499	1.56661	-0.42096	-0.05837
3.35204	1.16985	0.845805	-1.2964	-0.59518	-0.67135		2.11614	-0.16904	-0.70535	2.25274	-0.58612		-0.64093	-0.13934	-0.52202	-0.36129	0.627121		0.63408	-0.3986	1.5184	-0.46324	-0.12583
3.36025	1.19231	0.780003	-1.2978	-0.55903	-0.84379		2.1864	-0.18828	-0.67908	2.04185	-0.42796		-0.64814	-0.077	-0.57573	-0.21821	0.733163		0.630952	-0.38121	1.47542	-0.48287	-0.17784
3.36845	1.2534	0.747927	-1.32811	-0.61643	-0.96902		2.24111	-0.18389	-0.61583	1.83087	-0.27883		-0.63237	-0.05658	-0.64484	-0.08603	0.840741		0.63052	-0.40177	1.418	-0.4573	-0.19215
3.37665	1.35504	0.729102	-1.37033	-0.70164	-1.02449		2.27692	-0.17902	-0.52454	1.66499	-0.17347		-0.62149	-0.04692	-0.70675	0.00973	0.923598		0.651191	-0.42879	1.33927	-0.37042	-0.18755
3.38486	1.48533	0.694189	-1.40425	-0.73983	-1.02517		2.2744	-0.20574	-0.42201	1.55475	-0.11953		-0.62479	-0.02764	-0.7385	0.056932	0.963976		0.69876	-0.43626	1.24969	-0.21739	-0.19232
3.39306	1.61593	0.634207	-1.41635	-0.70644	-1.01456		2.23452	-0.26942	-0.31297	1.47208	-0.0989		-0.62125	-0.02037	-0.75175	0.08177	0.960657		0.765124	-0.42679	1.16697	-0.04236	-0.21671
3.40126	1.70423	0.56465	-1.41153	-0.62448	-1.03011		2.18191	-0.34269	-0.19934	1.38457	-0.1097		-0.59494	-0.06949	-0.77463	0.108391	0.928309		0.822013	-0.4176	1.08921	0.101643	-0.24729
3.40947	1.71996	0.497178	-1.40817	-0.53004	-1.08956		2.13718	-0.40348	-0.08093	1.26515	-0.17253		-0.54459	-0.17522	-0.81242	0.152965	0.874374		0.850602	-0.41606	1.00419	0.192358	-0.26766
3.41767	1.67736	0.442448	-1.41925	-0.45226	-1.17488		2.0875	-0.43944	0.042351	1.13204	-0.29535		-0.49232	-0.27208	-0.84681	0.243077	0.796155		0.84947	-0.41933	0.899234	0.246093	-0.27969
3.42587	1.6124	0.398417	-1.44734	-0.40555	-1.25683		2.00406	-0.45506	0.170414	1.00667	-0.45469		-0.46661	-0.29052	-0.85372	0.38749	0.684595		0.842351	-0.42367	0.793241	0.289229	-0.29315
3.43399	1.55729	0.359878	-1.47332	-0.39588	-1.31307		1.87375	-0.4514	0.296549	0.890247	-0.60409		-0.47788	-0.21991	-0.83784	0.558773	0.553143		0.861578	-0.43449	0.716481	0.309303	-0.32252
3.4422	1.51441	0.309014	-1.48199	-0.39079	-1.33875		1.72728	-0.42569	0.407254	0.760744	-0.71587		-0.51614	-0.12096	-0.81419	0.693781	0.426648		0.919323	-0.45528	0.674631	0.30309	-0.37102
3.4504	1.46752	0.242075	-1.4765	-0.33684	-1.34669		1.61996	-0.39313	0.496136	0.581102	-0.79997		-0.55486	-0.05346	-0.78698	0.742957	0.324609		0.995566	-0.4907	0.644375	0.292616	-0.42453
3.4586	1.41328	0.180518	-1.46848	-0.1847	-1.34144		1.5788	-0.37687	0.560592	0.371582	-0.88397		-0.58733	-0.03942	-0.75919	0.705219	0.239512		1.04812	-0.53251	0.602641	0.316561	-0.46903
3.46681	1.36161	0.153496	-1.46773	0.067371	-1.32514		1.59073	-0.39127	0.60694	0.2027	-0.99245		-0.63271	-0.05846	-0.73304	0.643654	0.147233		1.06308	-0.56318	0.544756	0.393449	-0.49304
3.47501	1.32827	0.172991	-1.46404	0.364127	-1.30183		1.61035	-0.41882	0.636401	0.120423	-1.12413		-0.70768	-0.08394	-0.71516	0.619993	0.055113		1.06276	-0.57619	0.484684	0.502505	-0.50374
3.48321	1.31134	0.212325	-1.44118	0.632014	-1.28656		1.59184	-0.42426	0.649808	0.113931	-1.26837		-0.79132	-0.10937	-0.69851	0.63312	-0.01309		1.08043	-0.57727	0.441396	0.599743	-0.51279
3.49142	1.29548	0.238012	-1.38332	0.802655	-1.28809		1.52339	-0.38254	0.653358	0.14236	-1.4198		-0.84201	-0.13242	-0.67824	0.639112	-0.0436		1.13257	-0.58113	0.416314	0.637641	-0.52629
3.49962	1.26866	0.228078	-1.287	0.864993	-1.29754		1.41496	-0.29552	0.654668	0.184735	-1.57223		-0.84027	-0.16194	-0.6639	0.611504	-0.03616		1.21382	-0.58883	0.397352	0.60328	-0.54168
3.50782	1.22255	0.188366	-1.16559	0.854364	-1.30765		1.2933	-0.19728	0.656969	0.216849	-1.71479		-0.80246	-0.1946	-0.6635	0.584978	0.005564		1.30907	-0.58866	0.370399	0.523177	-0.56009
3.51602	1.15826	0.144386	-1.04152	0.826863	-1.30996		1.1849	-0.12436	0.648953	0.200477	-1.8241		-0.76537	-0.21374	-0.67142	0.615083	0.086705		1.39568	-0.5827	0.325667	0.46866	-0.5875
3.52414	1.08105	0.099947	-0.94299	0.822951	-1.29938		1.11278	-0.08259	0.621514	0.09794	-1.89362		-0.74807	-0.21531	-0.67485	0.726799	0.187956		1.45157	-0.59046	0.266316	0.488413	-0.61609
3.53235	1.01267	0.047113	-0.88273	0.823902	-1.27497		1.09307	-0.04858	0.571112	-0.07306	-1.93214		-0.75987	-0.20081	-0.68083	0.903742	0.265751		1.45704	-0.63867	0.199361	0.556837	-0.62621
3.54055	0.972793	-0.01572	-0.86047	0.779886	-1.24249		1.10965	0.006875	0.501659	-0.23785	-1.95675		-0.80845	-0.17991	-0.70938	1.09538	0.272701		1.42493	-0.72933	0.131465	0.603475	-0.59707
3.54875	0.963668	-0.06798	-0.86701	0.645164	-1.2287		1.13339	0.083675	0.432578	-0.34523	-1.97051		-0.88673	-0.15947	-0.76094	1.28751	0.212936		1.3953	-0.82575	0.0725	0.578278	-0.53625
3.55696	0.956075	-0.08723	-0.89487	0.428914	-1.25016		1.14382	0.151052	0.375091	-0.37564	-1.96627		-0.96924	-0.14137	-0.80893	1.49077	0.149161		1.39714	-0.88472	0.024253	0.517274	-0.46887
3.56516	0.910019	-0.08413	-0.93561	0.193973	-1.29335		1.13746	0.174457	0.331083	-0.33813	-1.93902		-1.02366	-0.13171	-0.82031	1.72387	0.128376		1.43532	-0.88763	-0.01056	0.49473	-0.41034
3.57336	0.820973	-0.08588	-0.97767	-0.0078	-1.32214		1.11372	0.142811	0.29291	-0.25087	-1.90011		-1.04988	-0.1323	-0.78904	1.9881	0.139984		1.48294	-0.85345	-0.03384	0.563762	-0.36542
3.58157	0.717605	-0.10957	-1.01684	-0.14393	-1.31393		1.06264	0.06003	0.24853	-0.17444	-1.87815		-1.06758	-0.14217	-0.72233	2.25339	0.139282		1.51805	-0.80353	-0.0425	0.711612	-0.33047
3.58977	0.635937	-0.13667	-1.04427	-0.22062	-1.28597		0.982412	-0.05281	0.196993	-0.17598	-1.88716		-1.08773	-0.1419	-0.6324	2.4824	0.090575		1.53747	-0.75516	-0.03197	0.878721	-0.30753
3.59797	0.58045	-0.13934	-1.05148	-0.27011	-1.27183		0.886975	-0.1658	0.140613	-0.25815	-1.92623		-1.11158	-0.11638	-0.53299	2.63119	-0.00289		1.55472	-0.70848	-0.00611	1.01062	-0.28758
3.60618	0.537758	-0.12057	-1.03577	-0.33757	-1.28803		0.802644	-0.25575	0.083198	-0.3545	-1.97982		-1.13276	-0.06969	-0.45109	2.67173	-0.10858		1.59268	-0.65158	0.025852	1.08177	-0.25666
3.6143	0.512558	-0.10371	-1.01321	-0.45066	-1.30597		0.744832	-0.30978	0.026752	-0.38295	-2.02556		-1.15396	-0.01532	-0.41304	2.60448	-0.18649		1.65126	-0.5876	0.048735	1.12142	-0.21209
3.6225	0.509044	-0.10571	-1.01011	-0.60873	-1.28578		0.715442	-0.34816	-0.02012	-0.34295	-2.059		-1.17272	0.037063	-0.40642	2.45502	-0.22111		1.71888	-0.54319	0.056784	1.1785	-0.16584
3.6307	0.521644	-0.11837	-1.03719	-0.77685	-1.20706		0.708752	-0.39286	-0.04396	-0.29571	-2.08144		-1.1855	0.087643	-0.4046	2.27237	-0.2265		1.77562	-0.55304	0.054959	1.25872	-0.14217
3.63891	0.527171	-0.13157	-1.08961	-0.90489	-1.08841		0.710506	-0.44363	-0.04666	-0.29059	-2.08858		-1.18714	0.13346	-0.39456	2.08179	-0.23272		1.8168	-0.62258	0.051391	1.33791	-0.1543
3.64711	0.503673	-0.13106	-1.14418	-0.96311	-0.98056		0.70594	-0.48516	-0.04788	-0.31566	-2.0599		-1.16906	0.168527	-0.38987	1.89028	-0.25647		1.86005	-0.72794	0.059688	1.37694	-0.19541
3.65531	0.457967	-0.1146	-1.17594	-0.95586	-0.9276		0.682253	-0.49863	-0.06841	-0.30859	-1.98236		-1.12464	0.190568	-0.40237	1.69889	-0.28346		1.92441	-0.82652	0.07865	1.37589	-0.24147
3.66352	0.416198	-0.09501	-1.17908	-0.92918	-0.93673		0.652869	-0.48931	-0.10397	-0.24871	-1.8752		-1.05344	0.215271	-0.41136	1.52334	-0.2871		2.01161	-0.88872	0.100308	1.37256	-0.25705
3.67172	0.405488	-0.09606	-1.16552	-0.93893	-0.96838		0.64412	-0.4744	-0.1294	-0.16294	-1.78195		-0.97854	0.253788	-0.38942	1.38199	-0.24393		2.09494	-0.91424	0.116983	1.40674	-0.22989
3.67992	0.42657	-0.13347	-1.16389	-1.00275	-0.99419		0.673692	-0.47998	-0.11349	-0.09522	-1.74451		-0.94237	0.28426	-0.32978	1.27808	-0.16419		2.14446	-0.9059	0.127019	1.49115	-0.1737
3.68813	0.462124	-0.1827	-1.19338	-1.08032	-1.01287		0.732582	-0.52431	-0.04762	-0.07254	-1.76551		-0.97005	0.276419	-0.26113	1.2023	-0.08589		2.14821	-0.87685	0.129767	1.61313	-0.11698
3.69633	0.490696	-0.20557	-1.25	-1.08908	-1.03612		0.784081	-0.60273	0.043737	-0.08522	-1.81267		-1.04307	0.215147	-0.21507	1.14212	-0.05521		2.12889	-0.83176	0.119922	1.77807	-0.07737
3.70453	0.497074	-0.18923	-1.31125	-0.99836	-1.07669		0.807612	-0.68156	0.126653	-0.12522	-1.85312		-1.11265	0.125729	-0.19601	1.10346	-0.10473		2.12902	-0.77776	0.093639	2.00089	-0.05898
3.71265	0.503419	-0.15817	-1.35726	-0.84224	-1.11673		0.803313	-0.70732	0.177219	-0.20022	-1.8836		-1.14022	0.039594	-0.19434	1.0675	-0.22791		2.17517	-0.73243	0.057246	2.27068	-0.06633
3.72086	0.542948	-0.15041	-1.38793	-0.67784	-1.12335		0.78223	-0.64248	0.204018	-0.31846	-1.92286		-1.11257	-0.0314	-0.19945	0.985923	-0.39689		2.24699	-0.709	0.031003	2.51407	-0.10294
3.72906	0.615127	-0.16912	-1.40713	-0.55905	-1.07322		0.753022	-0.50218	0.23046	-0.4483	-1.96987		-1.05244	-0.08176	-0.20931	0.826137	-0.56803		2.29384	-0.72082	0.020257	2.64882	-0.16853
3.73726	0.667626	-0.19006	-1.41359	-0.49921	-0.97385		0.712246	-0.33646	0.264803	-0.53866	-2.00026		-1.00152	-0.10438	-0.221	0.607188	-0.69495		2.28887	-0.76631	0.01953	2.66191	-0.24404
3.74547	0.648537	-0.17659	-1.40049	-0.4964	-0.85951		0.668801	-0.1851	0.288511	-0.57601	-1.99137		-0.98651	-0.09024	-0.23548	0.401853	-0.75363		2.2387	-0.84204	0.018271	2.59529	-0.31289
3.75367	0.554671	-0.11404	-1.374	-0.53222	-0.76734		0.632968	-0.06028	0.267745	-0.59988	-1.96185		-1.0015	-0.06008	-0.25127	0.256846	-0.74996		2.17036	-0.9236	0.002976	2.50286	-0.36951
3.76187	0.432929	-0.02343	-1.35872	-0.59273	-0.72339		0.607937	0.034714	0.203935	-0.66907	-1.94893		-1.01375	-0.05721	-0.26956	0.159683	-0.72083		2.11097	-0.97811	-0.02788	2.40507	-0.4106
3.77008	0.329042	0.057922	-1.38052	-0.67639	-0.71314		0.577618	0.100808	0.123168	-0.78833	-1.96979		-1.01508	-0.10558	-0.29313	0.081401	-0.70518		2.05761	-1.00259	-0.07475	2.31802	-0.42955
3.77828	0.239125	0.090487	-1.44486	-0.76769	-0.70772		0.523008	0.138456	0.054553	-0.90545	-2.00346		-1.02661	-0.19434	-0.32446	0.014165	-0.72532		2.00624	-1.01516	-0.12149	2.24743	-0.42979
3.78648	0.142603	0.068279	-1.52462	-0.82934	-0.6877		0.446205	0.165216	0.007904	-0.9456	-2.0136		-1.07245	-0.28204	-0.36774	-0.01879	-0.77541		1.9575	-1.05128	-0.14708	2.19107	-0.44341
3.79469	0.036481	0.022439	-1.59243	-0.8029	-0.6491		0.364862	0.193668	-0.0319	-0.8812	-1.99551		-1.14435	-0.33341	-0.41467	-0.02795	-0.83345		1.91648	-1.12382	-0.13697	2.14368	-0.4864
3.80281	-0.05633	-0.00819	-1.63595	-0.68555	-0.59727		0.294826	0.215103	-0.07311	-0.75999	-1.96859		-1.20201	-0.33749	-0.45296	-0.05078	-0.88505		1.87468	-1.21017	-0.09653	2.0812	-0.53716
3.81101	-0.11131	-0.01824	-1.66065	-0.55141	-0.5414		0.244834	0.217576	-0.10871	-0.65977	-1.94999		-1.22239	-0.31147	-0.47386	-0.12429	-0.92011		1.81128	-1.26497	-0.05945	2.00228	-0.5494
3.81921	-0.12975	-0.02878	-1.67136	-0.49191	-0.50264		0.214756	0.201414	-0.12729	-0.63398	-1.94681		-1.21148	-0.27812	-0.47673	-0.24689	-0.93943		1.72307	-1.26576	-0.05289	1.92809	-0.48672
3.82741	-0.11556	-0.05446	-1.65586	-0.52237	-0.49256		0.199311	0.192319	-0.12302	-0.66426	-1.95688		-1.20188	-0.25195	-0.47301	-0.36047	-0.96331		1.63082	-1.22453	-0.08443	1.88092	-0.35788
3.83562	-0.07415	-0.09358	-1.61779	-0.57479	-0.50083		0.191679	0.192931	-0.09144	-0.71189	-1.99061		-1.21953	-0.23519	-0.46949	-0.39238	-1.02019		1.5715	-1.16983	-0.13531	1.86763	-0.19792
3.84382	-0.00837	-0.13143	-1.57517	-0.59276	-0.50482		0.183865	0.173494	-0.02389	-0.7478	-2.05		-1.25443	-0.22721	-0.47821	-0.29672	-1.11398		1.55619	-1.12611	-0.17787	1.85694	-0.04601
3.85202	0.064319	-0.16222	-1.5533	-0.58518	-0.50211		0.167433	0.110493	0.073588	-0.74407	-2.12773		-1.27299	-0.23246	-0.51738	-0.12024	-1.21553		1.54428	-1.09414	-0.19831	1.81354	0.06955
3.86023	0.111596	-0.17795	-1.56552	-0.61439	-0.51231		0.145422	0.015117	0.177186	-0.70751	-2.21063		-1.25063	-0.24991	-0.59499	0.040488	-1.28218		1.49507	-1.06937	-0.20045	1.72283	0.129125
3.86843	0.11974	-0.17233	-1.60951	-0.71949	-0.54052		0.119065	-0.06727	0.255773	-0.66053	-2.2836		-1.20161	-0.27399	-0.69877	0.115489	-1.28259		1.41146	-1.04824	-0.19706	1.63062	0.124938
3.87663	0.097404	-0.14858	-1.67859	-0.88081	-0.57146		0.094644	-0.10118	0.303704	-0.64094	-2.33927		-1.15978	-0.29327	-0.79526	0.091626	-1.22862		1.33572	-1.03185	-0.19312	1.61571	0.075988
3.88484	0.073067	-0.11139	-1.75037	-1.03219	-0.5775		0.083414	-0.08095	0.335368	-0.67593	-2.36872		-1.14059	-0.29789	-0.86299	0.001716	-1.15258		1.28772	-1.02831	-0.19333	1.68427	0.006009
3.89296	0.056291	-0.05481	-1.80397	-1.10242	-0.55069		0.085882	-0.02361	0.367015	-0.75712	-2.38088		-1.12994	-0.2982	-0.90065	-0.12587	-1.08824		1.24232	-1.03584	-0.19839	1.74334	-0.06326
3.90116	0.031616	0.060832	-1.82272	-1.08923	-0.5209		0.091539	0.045596	0.398821	-0.8418	-2.39125		-1.11649	-0.29989	-0.92149	-0.27239	-1.05547		1.16984	-1.05193	-0.20219	1.67755	-0.12358
3.90936	-0.01245	0.27208	-1.81596	-1.04184	-0.51458		0.077964	0.110326	0.413379	-0.88173	-2.40719		-1.12043	-0.29523	-0.94098	-0.40917	-1.05333		1.07303	-1.07078	-0.19695	1.46647	-0.16842
3.91757	-0.05544	0.579339	-1.81152	-1.01948	-0.53895		0.0451	0.154021	0.398816	-0.88218	-2.4152		-1.16965	-0.26793	-0.96618	-0.46053	-1.07034		0.991044	-1.07736	-0.1783	1.19493	-0.19419
3.92577	-0.05887	0.950357	-1.81852	-1.04476	-0.57577		0.014528	0.171073	0.354271	-0.88416	-2.38296		-1.25739	-0.2017	-0.99904	-0.37648	-1.0771		0.948082	-1.05492	-0.15799	0.973639	-0.20291
3.93397	-0.02149	1.32251	-1.8231	-1.07656	-0.59867		0.003915	0.166485	0.294877	-0.94123	-2.29158		-1.32837	-0.10715	-1.0328	-0.17751	-1.05638		0.931466	-0.99176	-0.1495	0.851652	-0.20508
3.94218	0.015801	1.6415	-1.80849	-1.07219	-0.58404		0.018561	0.15599	0.241451	-1.06618	-2.16128		-1.33362	-0.02242	-1.05635	0.076419	-1.02316		0.910003	-0.90149	-0.16	0.796734	-0.21813
3.95038	0.011644	1.86485	-1.78508	-1.0076	-0.52417		0.052537	0.156325	0.206122	-1.20706	-2.04367		-1.27025	0.006277	-1.06337	0.296974	-1.01203		0.880812	-0.79517	-0.17692	0.746605	-0.24714
3.95858	-0.02342	1.97738	-1.7751	-0.90542	-0.44454		0.114207	0.178702	0.189169	-1.2826	-1.97057		-1.17576	-0.016	-1.05877	0.427487	-1.04617		0.860771	-0.68048	-0.18467	0.652996	-0.28892
3.96679	-0.04488	1.99015	-1.78336	-0.8012	-0.38159		0.207735	0.232433	0.17242	-1.2399	-1.93623		-1.10564	-0.04303	-1.05351	0.458733	-1.10435		0.848387	-0.56401	-0.1835	0.527208	-0.3338
3.97499	-0.02438	1.9469	-1.79459	-0.72075	-0.35883		0.31042	0.315775	0.147292	-1.11028	-1.91657		-1.07878	-0.04777	-1.05203	0.41637	-1.15306		0.828474	-0.45062	-0.17221	0.422034	-0.37271
3.98311	0.024725	1.90002	-1.80065	-0.68992	-0.36966		0.394907	0.417293	0.123086	-0.97479	-1.89529		-1.0757	-0.03944	-1.05353	0.336923	-1.1746		0.768478	-0.34913	-0.14805	0.393093	-0.4049
3.99131	0.062896	1.87544	-1.8066	-0.70393	-0.39		0.437703	0.498301	0.115042	-0.9063	-1.89041		-1.06406	-0.04647	-1.04641	0.235789	-1.17802		0.651835	-0.26563	-0.1115	0.452134	-0.43276
3.99952	0.075971	1.88304	-1.81121	-0.73875	-0.40538		0.447978	0.523748	0.131803	-0.91808	-1.91757		-1.02741	-0.07289	-1.02281	0.140457	-1.17893		0.504677	-0.2032	-0.07377	0.538129	-0.45834
4.00772	0.067352	1.91595	-1.81194	-0.77398	-0.41749		0.444334	0.481643	0.159741	-0.97536	-1.97273		-0.98206	-0.08652	-0.9778	0.060653	-1.1759		0.377228	-0.16435	-0.05087	0.591428	-0.46949
4.01592	0.034039	1.95014	-1.80137	-0.82256	-0.43319		0.435391	0.390227	0.183734	-1.03196	-2.03609		-0.95668	-0.06049	-0.91058	-0.0114	-1.15711		0.309364	-0.15268	-0.03916	0.576648	-0.45284
4.02413	-0.02016	1.96947	-1.76273	-0.90809	-0.45194		0.415211	0.312493	0.204083	-1.03705	-2.08094		-0.97656	-0.00527	-0.83622	-0.08253	-1.10795		0.297072	-0.16236	-0.033	0.50332	-0.41296
4.03233	-0.07966	1.9809	-1.67549	-1.01987	-0.47649		0.384912	0.300612	0.230197	-0.97651	-2.07647		-1.02558	0.043328	-0.77157	-0.14298	-1.02526		0.312902	-0.16418	-0.03635	0.414557	-0.3651
4.04053	-0.11133	2.00704	-1.51917	-1.11036	-0.51239		0.364426	0.362008	0.263564	-0.86727	-1.98428		-1.0538	0.05712	-0.73781	-0.15796	-0.9211		0.320884	-0.13697	-0.05833	0.366679	-0.33284
4.04874	-0.09856	2.05901	-1.30502	-1.12315	-0.5599		0.366667	0.469769	0.29416	-0.74882	-1.80393		-1.02924	0.029879	-0.73643	-0.1083	-0.82771		0.305457	-0.09266	-0.09797	0.402901	-0.32458
4.05694	-0.05592	2.13428	-1.08392	-1.06509	-0.60389		0.383671	0.603232	0.312087	-0.6788	-1.57886		-0.96503	-0.02138	-0.75152	-0.01663	-0.76834		0.277102	-0.07582	-0.13251	0.503929	-0.33759
4.06514	-0.01777	2.19446	-0.92566	-0.9899	-0.61862		0.377774	0.7681	0.304186	-0.66922	-1.38499		-0.91235	-0.07934	-0.76568	0.04182	-0.72971		0.24554	-0.11753	-0.14426	0.604842	-0.37344
4.07326	-0.00647	2.19628	-0.87831	-0.93565	-0.60014		0.32104	0.966811	0.258792	-0.68509	-1.27022		-0.91036	-0.127	-0.7621	0.010752	-0.68782		0.216936	-0.19922	-0.13673	0.651262	-0.44069
4.08147	-0.01486	2.12718	-0.93583	-0.88397	-0.56092		0.222861	1.18399	0.171346	-0.67064	-1.22666		-0.96262	-0.15675	-0.73643	-0.07703	-0.63841		0.193301	-0.26765	-0.13167	0.643475	-0.53955
4.08967	-0.0295	1.99846	-1.05911	-0.79443	-0.52323		0.131704	1.39799	0.056838	-0.60884	-1.21816		-1.046	-0.17787	-0.68123	-0.13876	-0.61483		0.172948	-0.26817	-0.13207	0.619749	-0.63935
4.09787	-0.03796	1.84571	-1.18377	-0.68388	-0.50044		0.108536	1.59106	-0.05148	-0.52985	-1.20939		-1.13353	-0.19114	-0.5928	-0.12635	-0.63222		0.146241	-0.20397	-0.11627	0.597009	-0.70102
4.10608	-0.0307	1.70815	-1.25231	-0.59873	-0.48878		0.161185	1.74534	-0.12757	-0.47696	-1.18356		-1.2116	-0.20551	-0.47761	-0.07841	-0.66457		0.103994	-0.11873	-0.04901	0.569527	-0.70699
4.11428	-0.0082	1.6139	-1.24838	-0.57551	-0.48707		0.24903	1.82103	-0.16059	-0.47271	-1.14468		-1.26827	-0.23186	-0.35864	-0.05161	-0.67716		0.041777	-0.06215	0.093212	0.526185	-0.67146
4.12248	0.020971	1.55679	-1.20346	-0.60208	-0.48618		0.315571	1.78138	-0.16125	-0.50262	-1.11725		-1.30238	-0.28214	-0.27037	-0.06966	-0.64996		-0.04021	-0.05715	0.295521	0.472232	-0.62358
4.13068	0.040846	1.49802	-1.16577	-0.64352	-0.47976		0.329042	1.64036	-0.13976	-0.54563	-1.12159		-1.32079	-0.36134	-0.23378	-0.08741	-0.59927		-0.12502	-0.08448	0.506636	0.427776	-0.59023
4.13889	0.03943	1.42461	-1.1449	-0.68175	-0.46591		0.294443	1.47704	-0.10933	-0.59352	-1.15011		-1.3368	-0.44482	-0.2465	-0.03852	-0.54608		-0.19357	-0.11082	0.661472	0.419886	-0.59002
4.14709	0.014781	1.34454	-1.11151	-0.6923	-0.45293		0.232831	1.37027	-0.08854	-0.64756	-1.17485		-1.35151	-0.49733	-0.28332	0.072888	-0.49359		-0.22538	-0.09604	0.733861	0.469453	-0.62291
4.15529	-0.01293	1.27069	-1.03976	-0.67242	-0.45264		0.179072	1.33738	-0.0847	-0.69814	-1.1653		-1.35689	-0.49453	-0.31781	0.197147	-0.44925		-0.22119	-0.01802	0.748567	0.544044	-0.67777
4.16342	-0.02174	1.18912	-0.94601	-0.63977	-0.45692		0.149007	1.33843	-0.09683	-0.70739	-1.12129		-1.34797	-0.46036	-0.33867	0.253885	-0.43507		-0.21052	0.121742	0.7465	0.597882	-0.73266
4.17162	0.001291	1.07366	-0.87374	-0.62725	-0.44942		0.14889	1.31702	-0.10956	-0.64491	-1.06752		-1.32098	-0.44176	-0.35378	0.192665	-0.47552		-0.2175	0.300171	0.748325	0.602338	-0.7705
4.17982	0.057161	0.935259	-0.86304	-0.66324	-0.40858		0.171843	1.24665	-0.12078	-0.52179	-1.02767		-1.28574	-0.45113	-0.38051	0.022143	-0.55236		-0.26044	0.481853	0.737498	0.568103	-0.79226
4.18803	0.118188	0.817382	-0.91466	-0.72718	-0.31861		0.198551	1.12893	-0.14277	-0.38406	-1.01568		-1.25871	-0.47083	-0.42241	-0.20216	-0.62954		-0.33425	0.648432	0.708172	0.515057	-0.80718
4.19623	0.164471	0.750655	-0.98615	-0.78474	-0.18893		0.216574	0.986853	-0.17837	-0.27354	-1.01904		-1.25869	-0.47378	-0.47428	-0.38301	-0.68315		-0.41951	0.799293	0.681889	0.43725	-0.83055
4.20443	0.199096	0.717513	-1.03384	-0.81743	-0.06156		0.226076	0.84466	-0.21525	-0.19596	-1.00951		-1.2911	-0.46058	-0.52449	-0.46343	-0.71018		-0.49098	0.946603	0.68488	0.334488	-0.86737
4.21263	0.235111	0.689258	-1.03062	-0.83344	0.013529		0.238456	0.721772	-0.23308	-0.15606	-0.95733		-1.32419	-0.44923	-0.57227	-0.44619	-0.72292		-0.53199	1.08341	0.714258	0.221965	-0.92014
4.22084	0.269703	0.666597	-0.97904	-0.8417	0.02199		0.258376	0.632697	-0.23515	-0.16192	-0.8655		-1.31966	-0.44142	-0.6222	-0.39885	-0.7277		-0.55825	1.18345	0.724518	0.157468	-0.98603
4.22904	0.282395	0.658298	-0.91098	-0.84308	-0.00563		0.280108	0.564278	-0.24547	-0.22923	-0.76456		-1.25908	-0.41453	-0.67024	-0.38614	-0.72191		-0.58841	1.21833	0.679412	0.189142	-1.0497
4.23724	0.270275	0.642099	-0.85715	-0.84692	-0.02599		0.291228	0.505835	-0.2862	-0.31996	-0.68167		-1.15717	-0.34494	-0.70995	-0.41376	-0.70192		-0.63251	1.19178	0.577304	0.314632	-1.10228
4.24545	0.248276	0.580068	-0.83816	-0.8605	-0.02664		0.290098	0.455095	-0.35952	-0.37237	-0.64173		-1.04607	-0.23164	-0.73174	-0.45971	-0.66939		-0.68028	1.14288	0.460156	0.485634	-1.14538
4.25365	0.250822	0.46753	-0.85156	-0.89126	-0.03132		0.29113	0.415644	-0.45049	-0.37975	-0.65394		-0.9458	-0.08822	-0.74252	-0.49481	-0.62273		-0.71213	1.10682	0.379631	0.636504	-1.19782
4.26177	0.300951	0.33686	-0.88588	-0.93823	-0.06232		0.29469	0.399278	-0.54457	-0.39629	-0.7024		-0.85779	0.057353	-0.76055	-0.50916	-0.56805		-0.72823	1.09706	0.350732	0.728839	-1.26834
4.26998	0.378397	0.232535	-0.91708	-0.9955	-0.11608		0.28674	0.404398	-0.63191	-0.47958	-0.74774		-0.75588	0.175777	-0.80003	-0.50105	-0.52331		-0.73406	1.10981	0.338134	0.753404	-1.345
4.27818	0.442016	0.178512	-0.92111	-1.06032	-0.16044		0.245509	0.408963	-0.71409	-0.61197	-0.74661		-0.61753	0.255071	-0.865	-0.47321	-0.49017		-0.73501	1.15079	0.291959	0.723108	-1.40305
4.28638	0.453785	0.174829	-0.90429	-1.14304	-0.17793		0.174409	0.384807	-0.77755	-0.74631	-0.69762		-0.43768	0.301246	-0.94113	-0.43548	-0.45877		-0.72519	1.22652	0.196087	0.660851	-1.42456
4.29458	0.410164	0.217729	-0.88482	-1.25763	-0.17057		0.114512	0.328174	-0.80934	-0.8663	-0.64164		-0.2464	0.344307	-1.00919	-0.38515	-0.41926		-0.70782	1.31784	0.079955	0.583607	-1.41974
4.30279	0.345032	0.280992	-0.87409	-1.37832	-0.14844		0.109472	0.266398	-0.81282	-0.98712	-0.6193		-0.09065	0.393713	-1.04882	-0.30808	-0.38436		-0.70105	1.39282	-0.00433	0.526668	-1.40814
4.31099	0.314038	0.330894	-0.86169	-1.46561	-0.12552		0.172421	0.23931	-0.80809	-1.13462	-0.62651		0.011404	0.43538	-1.05565	-0.19676	-0.37882		-0.72194	1.42543	-0.03063	0.50711	-1.40596
4.31919	0.358055	0.342411	-0.8301	-1.47628	-0.11022		0.255862	0.274713	-0.81757	-1.29194	-0.63476		0.077672	0.44228	-1.04653	-0.09045	-0.40221		-0.76861	1.41319	-0.0136	0.492731	-1.41449
4.3274	0.460318	0.31894	-0.78431	-1.40208	-0.10514		0.296326	0.352308	-0.84262	-1.42447	-0.62943		0.133906	0.405484	-1.04241	-0.03979	-0.43513		-0.81889	1.37434	0.017728	0.430819	-1.42262
4.3356	0.568077	0.281328	-0.74817	-1.2895	-0.0894		0.269015	0.420334	-0.87244	-1.51823	-0.61382		0.174006	0.333892	-1.06241	-0.05576	-0.4587		-0.84758	1.34158	0.043584	0.309292	-1.42449
4.3438	0.636235	0.236094	-0.74166	-1.18573	-0.04183		0.202019	0.440967	-0.88613	-1.58827	-0.59401		0.174363	0.227386	-1.1086	-0.10663	-0.47821		-0.82771	1.35296	0.060375	0.168964	-1.42445
4.35192	0.660131	0.186353	-0.7635	-1.11597	0.030676		0.151403	0.420742	-0.86447	-1.64459	-0.56589		0.124715	0.096986	-1.16177	-0.12308	-0.50028		-0.76224	1.42355	0.059861	0.068614	-1.43363
4.36013	0.650219	0.139674	-0.79777	-1.05548	0.097976		0.144707	0.391437	-0.81552	-1.69151	-0.53035		0.051309	-0.03991	-1.19572	-0.06518	-0.51663		-0.68398	1.53661	0.033705	0.053053	-1.45715
4.36833	0.609801	0.103521	-0.82423	-0.97538	0.116509		0.17172	0.384917	-0.7686	-1.74213	-0.49072		-0.00249	-0.16575	-1.20418	0.071033	-0.51805		-0.62535	1.65607	-0.01608	0.114781	-1.49213
4.37653	0.535355	0.076542	-0.82828	-0.86679	0.068212		0.203279	0.411458	-0.76234	-1.79563	-0.45618		-0.02651	-0.25565	-1.2007	0.237525	-0.49983		-0.59933	1.7449	-0.0746	0.226019	-1.52596
4.38474	0.434611	0.045173	-0.80552	-0.72432	-0.02837		0.221692	0.450463	-0.80437	-1.83819	-0.43234		-0.041	-0.29854	-1.19647	0.371807	-0.47699		-0.58763	1.79541	-0.11731	0.343825	-1.53861
4.39294	0.354697	0.003309	-0.7601	-0.54421	-0.13377		0.233162	0.476472	-0.86114	-1.84807	-0.41409		-0.07078	-0.28617	-1.19857	0.43424	-0.47067		-0.57652	1.81439	-0.1342	0.404532	-1.52732
4.40114	0.344253	-0.05232	-0.71261	-0.32006	-0.21103		0.250757	0.465181	-0.89271	-1.82821	-0.40712		-0.12591	-0.23778	-1.20065	0.426964	-0.48666		-0.56949	1.80207	-0.1342	0.366105	-1.49802
4.40935	0.424323	-0.12045	-0.68466	-0.0797	-0.24867		0.275984	0.404142	-0.88807	-1.79256	-0.41138		-0.19573	-0.19363	-1.20983	0.407905	-0.51823		-0.58878	1.75777	-0.13556	0.230968	-1.47115
4.41755	0.564232	-0.1968	-0.68747	0.133395	-0.24886		0.292455	0.302866	-0.87267	-1.73398	-0.42045		-0.26622	-0.1913	-1.24074	0.436392	-0.55676		-0.64628	1.69453	-0.15203	0.050446	-1.4624
4.42575	0.702783	-0.27632	-0.71268	0.290446	-0.22909		0.280569	0.18752	-0.863	-1.64547	-0.42289		-0.32074	-0.22753	-1.28411	0.527908	-0.59963		-0.7149	1.63572	-0.17452	-0.1202	-1.47342
4.43395	0.77897	-0.34816	-0.74163	0.364103	-0.19696		0.231617	0.098561	-0.84889	-1.51855	-0.41731		-0.35231	-0.26228	-1.3093	0.656768	-0.64439		-0.7657	1.58819	-0.18873	-0.25282	-1.50214
4.44208	0.76179	-0.39869	-0.7626	0.339907	-0.16117		0.157645	0.045961	-0.81768	-1.38586	-0.4291		-0.35596	-0.27209	-1.28568	0.772467	-0.6926		-0.78102	1.54373	-0.1864	-0.33801	-1.54325
4.45028	0.677466	-0.41608	-0.76864	0.227763	-0.13708		0.080972	0.025269	-0.77752	-1.29738	-0.47822		-0.33666	-0.27164	-1.22398	0.842652	-0.73871		-0.76039	1.48407	-0.17218	-0.37635	-1.59614
4.45848	0.584399	-0.40047	-0.76364	0.078559	-0.14131		0.008163	0.028172	-0.74623	-1.28461	-0.55869		-0.3193	-0.29062	-1.159	0.873292	-0.77131		-0.71995	1.40719	-0.14904	-0.34268	-1.64359
4.46669	0.518234	-0.35015	-0.75142	-0.04577	-0.16921		-0.06885	0.042613	-0.72488	-1.34364	-0.63265		-0.31915	-0.32426	-1.12362	0.897785	-0.78722		-0.679	1.32565	-0.10241	-0.24231	-1.66292
4.47489	0.475699	-0.27026	-0.73174	-0.09123	-0.18671		-0.16149	0.059082	-0.68197	-1.43333	-0.66306		-0.33823	-0.35727	-1.12529	0.925963	-0.79206		-0.64549	1.25584	-0.00707	-0.12161	-1.65763
4.48309	0.438287	-0.17957	-0.70961	-0.05595	-0.17311		-0.25845	0.056799	-0.5633	-1.51375	-0.65252		-0.36839	-0.38745	-1.13824	0.941777	-0.80294		-0.61383	1.20066	0.152159	-0.03143	-1.65563
4.49129	0.408521	-0.10423	-0.68565	0.021227	-0.12947		-0.32973	0.020704	-0.3331	-1.54141	-0.63329		-0.40322	-0.42275	-1.13729	0.915001	-0.82368		-0.58395	1.13634	0.362708	0.004611	-1.68233
4.4995	0.399207	-0.06241	-0.65427	0.122064	-0.07136		-0.35117	-0.04978	0.002518	-1.48845	-0.63604		-0.44008	-0.46066	-1.1126	0.830311	-0.84718		-0.55321	1.04116	0.588356	-0.00321	-1.72227
4.5077	0.413087	-0.02977	-0.59863	0.240022	-0.00522		-0.32093	-0.13797	0.389206	-1.36249	-0.66156		-0.47628	-0.47136	-1.07565	0.723993	-0.87104		-0.5217	0.905384	0.791214	-0.048	-1.74243
4.5159	0.440463	0.034707	-0.50461	0.374435	0.079503		-0.27764	-0.21558	0.744185	-1.18176	-0.68886		-0.50298	-0.43291	-1.04189	0.64558	-0.90758		-0.49972	0.764068	0.949098	-0.11122	-1.73409
4.52411	0.467859	0.144532	-0.38402	0.531902	0.17972		-0.25679	-0.25419	1.00497	-0.98215	-0.69647		-0.50833	-0.35178	-1.01277	0.622514	-0.97141		-0.49517	0.678343	1.06614	-0.16399	-1.71919
4.53223	0.500146	0.277747	-0.2592	0.736774	0.278048		-0.269	-0.2229	1.15363	-0.80202	-0.67997		-0.51009	-0.26125	-0.98598	0.638767	-1.03334		-0.50195	0.675287	1.15611	-0.16603	-1.72104
4.54043	0.540675	0.398767	-0.15796	1.00967	0.353895		-0.30812	-0.08987	1.22339	-0.65952	-0.65122		-0.54319	-0.20087	-0.96684	0.65829	-1.05291		-0.50078	0.728619	1.23247	-0.11726	-1.73646
4.54864	0.578462	0.498323	-0.08848	1.31294	0.40029		-0.3615	0.170847	1.25511	-0.53519	-0.61464		-0.62785	-0.18698	-0.97291	0.648897	-1.01756		-0.49443	0.76997	1.29785	-0.07661	-1.7529
4.55684	0.594317	0.573796	-0.04723	1.58224	0.417173		-0.42343	0.580039	1.25999	-0.4018	-0.55393		-0.73478	-0.22404	-1.00569	0.592421	-0.96573		-0.49965	0.762161	1.35207	-0.10583	-1.7532
4.56504	0.579287	0.617892	-0.03243	1.73775	0.400966		-0.47493	1.13371	1.23752	-0.28681	-0.44104		-0.80935	-0.29224	-1.05097	0.517242	-0.95822		-0.53613	0.7137	1.40266	-0.21312	-1.7287
4.57325	0.528237	0.626483	-0.04546	1.76069	0.364059		-0.49702	1.76811	1.18549	-0.24477	-0.27667		-0.83432	-0.35648	-1.08846	0.446867	-1.01137		-0.60223	0.657344	1.44569	-0.33661	-1.6722
4.58145	0.444763	0.617038	-0.07559	1.71903	0.33097		-0.48436	2.36607	1.11512	-0.29786	-0.08827		-0.83555	-0.3912	-1.11377	0.394969	-1.09583		-0.66689	0.614567	1.47517	-0.42426	-1.58278
4.58965	0.361094	0.621991	-0.10176	1.69265	0.32274		-0.45699	2.83164	1.032	-0.37458	0.086805		-0.85191	-0.38578	-1.13459	0.365553	-1.16885		-0.71593	0.575349	1.4777	-0.47238	-1.47529
4.59785	0.318188	0.644148	-0.12276	1.71367	0.342114		-0.44757	3.12972	0.940523	-0.37986	0.219826		-0.88758	-0.35508	-1.15212	0.331573	-1.21095		-0.74513	0.53102	1.45824	-0.51832	-1.36413
4.60606	0.342123	0.663126	-0.15922	1.7483	0.366942		-0.46457	3.28608	0.860852	-0.29074	0.323277		-0.91919	-0.32645	-1.16658	0.266405	-1.22367		-0.74865	0.481365	1.43194	-0.58652	-1.26245
4.61426	0.419335	0.673118	-0.23393	1.75556	0.37704		-0.49279	3.33604	0.81754	-0.16761	0.416477		-0.93607	-0.32871	-1.17984	0.155129	-1.21418		-0.72016	0.438298	1.40732	-0.63649	-1.1721
4.62238	0.520384	0.693226	-0.33223	1.71951	0.374005		-0.51183	3.28264	0.822816	-0.07829	0.511784		-0.9374	-0.36665	-1.19896	0.01514	-1.19264		-0.67032	0.403759	1.38062	-0.61472	-1.10255
4.63058	0.63847	0.742406	-0.4089	1.66624	0.379856		-0.50923	3.12393	0.849023	-0.00725	0.60947		-0.93053	-0.4242	-1.22012	-0.1076	-1.16015		-0.63329	0.370983	1.3363	-0.49463	-1.06949
4.63879	0.779216	0.817463	-0.42771	1.62705	0.406273		-0.48152	2.87686	0.851674	0.089046	0.69937		-0.91206	-0.48724	-1.21933	-0.1626	-1.11973		-0.63249	0.332537	1.27507	-0.30152	-1.07609
4.64699	0.933986	0.911942	-0.39032	1.59616	0.452621		-0.43459	2.5962	0.803595	0.233708	0.784089		-0.88872	-0.54276	-1.18972	-0.12972	-1.08321		-0.67462	0.292117	1.2082	-0.09722	-1.11007
4.65519	1.0534	1.02584	-0.33737	1.53104	0.512533		-0.38373	2.34831	0.710358	0.406894	0.87403		-0.87898	-0.57765	-1.14741	-0.06009	-1.07097		-0.74838	0.263823	1.14044	0.068568	-1.13556
4.6634	1.09367	1.16437	-0.30183	1.3823	0.583934		-0.34578	2.18057	0.600754	0.585787	0.985451		-0.88576	-0.57711	-1.12121	-0.02895	-1.09433		-0.8292	0.253109	1.07032	0.159421	-1.12555
4.6716	1.06625	1.32158	-0.29065	1.1503	0.671714		-0.33692	2.09927	0.505105	0.768448	1.11572		-0.89744	-0.53447	-1.12551	-0.06765	-1.14247		-0.89272	0.251974	0.994268	0.159214	-1.07981
4.6798	1.01908	1.49936	-0.29072	0.886668	0.770592		-0.35223	2.06472	0.450029	0.921124	1.24654		-0.90164	-0.45161	-1.14861	-0.13491	-1.19893		-0.92207	0.232493	0.920326	0.06642	-1.02241
4.68801	0.99396	1.70565	-0.28553	0.66483	0.879476		-0.38336	2.03613	0.447974	1.00069	1.36328		-0.9074	-0.35625	-1.17822	-0.18083	-1.24565		-0.9333	0.180277	0.857909	-0.09148	-0.99167
4.69621	0.994883	1.94384	-0.28246	0.522914	0.987724		-0.41925	1.98134	0.495358	0.989835	1.44949		-0.93223	-0.28656	-1.21021	-0.2198	-1.27841		-0.9586	0.11625	0.810118	-0.26002	-1.00647
4.70441	1.00537	2.20259	-0.29828	0.448758	1.08378		-0.44317	1.89112	0.568372	0.925761	1.50001		-0.97681	-0.25837	-1.24591	-0.30683	-1.29163		-1.00927	0.075513	0.763452	-0.39382	-1.06028
4.71253	1.01553	2.4491	-0.34983	0.423682	1.1548		-0.44591	1.78361	0.637047	0.88385	1.51764		-1.02182	-0.27928	-1.27243	-0.46345	-1.28666		-1.04873	0.083428	0.706567	-0.47058	-1.12541
4.72074	1.02649	2.65195	-0.43615	0.418142	1.18501		-0.42417	1.68508	0.682831	0.899782	1.51297		-1.0517	-0.34076	-1.27171	-0.62573	-1.27114		-1.0366	0.134859	0.64456	-0.50417	-1.17406
4.72894	1.04137	2.79964	-0.5242	0.392603	1.17744		-0.39592	1.61963	0.693389	0.949826	1.4969		-1.07404	-0.42797	-1.24372	-0.7193	-1.24132		-0.97391	0.200431	0.582836	-0.515	-1.20264
4.73714	1.05165	2.89823	-0.57764	0.308364	1.13784		-0.37674	1.5843	0.664218	0.971228	1.46903		-1.09558	-0.51914	-1.20372	-0.72031	-1.20374		-0.90422	0.243709	0.522584	-0.50542	-1.21697
4.74535	1.04152	2.9706	-0.58342	0.145617	1.08228		-0.3579	1.5476	0.595987	0.935986	1.41822		-1.11655	-0.59036	-1.17084	-0.66227	-1.17246		-0.87281	0.237477	0.448683	-0.45554	-1.2178
4.75355	0.998767	3.02617	-0.56035	-0.05736	1.03553		-0.31876	1.4801	0.505626	0.865362	1.33607		-1.13295	-0.63563	-1.15585	-0.57993	-1.167		-0.87413	0.188337	0.356547	-0.36409	-1.18546
4.76175	0.929017	3.06655	-0.52856	-0.24559	1.01296		-0.23967	1.39623	0.430102	0.801026	1.23864		-1.14041	-0.65854	-1.1519	-0.46874	-1.19569		-0.87139	0.125432	0.263187	-0.27562	-1.11157
4.76996	0.841984	3.08072	-0.49132	-0.3773	1.01431		-0.13321	1.3258	0.393172	0.758746	1.1435		-1.14009	-0.68055	-1.14665	-0.33802	-1.24647		-0.82814	0.082127	0.202491	-0.24809	-1.01584
4.77816	0.749164	3.05486	-0.43876	-0.4611	1.01507		-0.03279	1.27301	0.392126	0.706646	1.06007		-1.12929	-0.71961	-1.13464	-0.21091	-1.30757		-0.7322	0.074846	0.193864	-0.31803	-0.93344
4.78636	0.659039	2.98422	-0.37777	-0.5167	1.00281		0.036812	1.23053	0.392592	0.606308	0.990162		-1.11932	-0.77999	-1.1184	-0.10239	-1.36076		-0.60853	0.088207	0.217849	-0.45226	-0.88743
4.79456	0.567674	2.86622	-0.3328	-0.52917	0.987445		0.085141	1.19117	0.360813	0.436452	0.931688		-1.12114	-0.85756	-1.10452	0.010443	-1.37809		-0.49139	0.098116	0.251616	-0.57518	-0.87814
4.80277	0.478323	2.71499	-0.31277	-0.48462	0.985855		0.149448	1.15107	0.285903	0.230546	0.893457		-1.13298	-0.92607	-1.10473	0.200869	-1.31959		-0.40887	0.089257	0.294938	-0.62438	-0.90261
4.81089	0.382469	2.55425	-0.30152	-0.37872	0.98838		0.257122	1.09955	0.178134	0.049608	0.871068		-1.13698	-0.95531	-1.11297	0.505793	-1.16459		-0.35864	0.066482	0.369856	-0.58317	-0.95432
4.81909	0.269346	2.41253	-0.27171	-0.24558	0.965129		0.402825	1.03605	0.059534	-0.07532	0.853662		-1.11665	-0.93084	-1.11369	0.884599	-0.93363		-0.3258	0.049371	0.506024	-0.5151	-1.03512
4.8273	0.147565	2.29805	-0.22596	-0.15067	0.909863		0.556198	0.978597	-0.05797	-0.16789	0.818259		-1.08887	-0.88183	-1.09654	1.24381	-0.69326		-0.30114	0.060442	0.706607	-0.48893	-1.13885
4.8355	0.04912	2.19551	-0.19616	-0.1359	0.852999		0.684701	0.939344	-0.16122	-0.26982	0.743552		-1.08004	-0.85701	-1.05956	1.52271	-0.51465		-0.28102	0.111292	0.951581	-0.52732	-1.24612
4.8437	0.01469	2.08321	-0.20684	-0.17282	0.844034		0.776073	0.912081	-0.24068	-0.38248	0.6361		-1.09723	-0.87841	-1.00853	1.74262	-0.42736		-0.27474	0.183848	1.20236	-0.58688	-1.3288
4.85191	0.051946	1.95148	-0.25834	-0.18219	0.90372		0.837152	0.853835	-0.29857	-0.47822	0.516508		-1.11794	-0.92719	-0.94966	1.93405	-0.4116		-0.28744	0.245062	1.42385	-0.59068	-1.35195
4.86011	0.145941	1.80971	-0.32592	-0.11226	1.00446		0.879863	0.727768	-0.34456	-0.52198	0.41441		-1.11077	-0.96702	-0.88864	2.11754	-0.41609		-0.32088	0.272385	1.59849	-0.50674	-1.31612
4.86831	0.267112	1.667	-0.38886	0.025912	1.09067		0.908272	0.556262	-0.38746	-0.50573	0.336496		-1.06985	-0.98034	-0.82249	2.29637	-0.4038		-0.37606	0.279944	1.71449	-0.36785	-1.26537
4.87652	0.376228	1.53358	-0.43379	0.154986	1.11478		0.922691	0.402115	-0.42546	-0.47277	0.269547		-1.01419	-0.96419	-0.75304	2.47748	-0.37789		-0.43342	0.278505	1.76966	-0.25352	-1.2466
4.88472	0.447647	1.42102	-0.45683	0.196743	1.07796		0.908876	0.316643	-0.45194	-0.44698	0.201605		-0.97653	-0.92883	-0.69745	2.6585	-0.3593		-0.46665	0.263216	1.76755	-0.20067	-1.26291
4.89292	0.464527	1.32892	-0.4721	0.129614	1.01293		0.858436	0.287024	-0.46379	-0.42987	0.136108		-0.9786	-0.88217	-0.66673	2.80443	-0.36589		-0.4614	0.227126	1.7226	-0.17802	-1.27031
4.90104	0.438411	1.26216	-0.49141	-0.00334	0.958755		0.779561	0.267405	-0.47862	-0.42357	0.09241		-1.02116	-0.83003	-0.66711	2.85349	-0.39363		-0.42147	0.167523	1.65191	-0.14443	-1.2371
4.90924	0.393349	1.22416	-0.51383	-0.13959	0.925771		0.693885	0.229515	-0.51989	-0.44798	0.0757		-1.0809	-0.7926	-0.69192	2.77001	-0.43992		-0.35541	0.100889	1.57129	-0.07245	-1.17251
4.91745	0.348955	1.21954	-0.52575	-0.25105	0.896399		0.632988	0.176134	-0.58703	-0.52832	0.069551		-1.13042	-0.78794	-0.73038	2.58668	-0.50019		-0.27098	0.031535	1.49362	0.030784	-1.12205
4.92565	0.313142	1.2307	-0.51993	-0.3302	0.852449		0.609008	0.129281	-0.65632	-0.66161	0.054556		-1.15449	-0.83065	-0.77432	2.36643	-0.55519		-0.17493	-0.04336	1.42444	0.143216	-1.10785
4.93385	0.289188	1.22926	-0.51098	-0.36682	0.776609		0.614432	0.099677	-0.69527	-0.81322	0.035639		-1.15993	-0.91718	-0.81938	2.16032	-0.58435		-0.08157	-0.11517	1.35955	0.230463	-1.1107
4.94206	0.2847	1.19572	-0.52189	-0.33982	0.673947		0.621096	0.084441	-0.70384	-0.91547	0.039595		-1.16646	-1.01883	-0.85492	1.99441	-0.56487		-0.02263	-0.15738	1.27351	0.248459	-1.10125
4.95026	0.297242	1.12636	-0.56856	-0.24613	0.562731		0.595798	0.072575	-0.70746	-0.92427	0.08534		-1.18263	-1.10692	-0.86564	1.85189	-0.5044		-0.02173	-0.14879	1.15331	0.162016	-1.06719
4.95846	0.311901	1.04512	-0.6464	-0.14058	0.459817		0.531036	0.065347	-0.72701	-0.86106	0.170907		-1.21196	-1.16637	-0.85438	1.70526	-0.43852		-0.08306	-0.11587	1.01993	0.006173	-1.02502
4.96667	0.308712	0.966307	-0.73522	-0.08785	0.381678		0.444068	0.068184	-0.76282	-0.78803	0.262398		-1.25273	-1.21096	-0.84469	1.52623	-0.40026		-0.18199	-0.09414	0.924201	-0.13854	-0.99829
4.97487	0.289916	0.899033	-0.80637	-0.12106	0.328763		0.370395	0.076878	-0.79281	-0.74517	0.326596		-1.29526	-1.25004	-0.85919	1.32405	-0.39595		-0.2794	-0.10018	0.896497	-0.23669	-1.0058
4.98307	0.26795	0.848941	-0.83429	-0.19481	0.290041		0.328113	0.079051	-0.80933	-0.72574	0.339331		-1.33465	-1.28574	-0.89414	1.13697	-0.39716		-0.34508	-0.12237	0.909604	-0.32466	-1.04711
4.99119	0.246295	0.80421	-0.81175	-0.22829	0.258482		0.307946	0.051475	-0.81276	-0.70894	0.302359		-1.36066	-1.3225	-0.9246	0.999727	-0.3831		-0.36552	-0.13848	0.913669	-0.45774	-1.10123
4.9994	0.21838	0.743456	-0.76145	-0.19433	0.241771		0.290046	-0.01221	-0.80353	-0.67487	0.24686		-1.36685	-1.3622	-0.9339	0.906334	-0.35989		-0.35593	-0.14402	0.869919	-0.63624	-1.14273
5.0076	0.175597	0.648838	-0.72542	-0.12618	0.240486		0.257493	-0.09996	-0.77638	-0.63197	0.209291		-1.34563	-1.3965	-0.92356	0.810027	-0.35642		-0.34254	-0.14688	0.781519	-0.7999	-1.15594
5.0158	0.130626	0.531617	-0.72358	-0.08187	0.242739		0.213151	-0.17742	-0.72249	-0.59583	0.2187		-1.29809	-1.39516	-0.9094	0.714172	-0.39171		-0.34814	-0.15408	0.676531	-0.90494	-1.15654
5.02401	0.104516	0.423733	-0.75022	-0.08586	0.241612		0.16236	-0.2188	-0.64994	-0.55936	0.265625		-1.24225	-1.33423	-0.89588	0.653285	-0.44956		-0.38905	-0.15807	0.577033	-0.94993	-1.15878
5.03221	0.103353	0.344788	-0.78477	-0.11075	0.228924		0.103561	-0.23457	-0.57772	-0.48797	0.315372		-1.19646	-1.23004	-0.88189	0.650907	-0.50119		-0.46457	-0.15094	0.501342	-0.96833	-1.15924
5.04041	0.117019	0.280351	-0.8052	-0.09634	0.196318		0.034851	-0.24974	-0.53399	-0.33837	0.335581		-1.18103	-1.13256	-0.8789	0.697122	-0.52974		-0.55983	-0.12786	0.45355	-0.97512	-1.15208
5.04862	0.126508	0.207372	-0.80192	0.000646	0.13414		-0.03676	-0.29246	-0.53163	-0.12336	0.313199		-1.19745	-1.08318	-0.89171	0.737749	-0.53798		-0.63562	-0.09015	0.433	-0.97457	-1.13982
5.05682	0.140563	0.125649	-0.77138	0.151764	0.044823		-0.10449	-0.36516	-0.55718	0.117035	0.272039		-1.22229	-1.0779	-0.91026	0.724552	-0.5325		-0.66275	-0.04702	0.430131	-0.96061	-1.13793
5.06502	0.175688	0.061438	-0.73003	0.299803	-0.04271		-0.15963	-0.44928	-0.58324	0.338695	0.236146		-1.23719	-1.08982	-0.90652	0.623299	-0.52486		-0.64727	-0.00539	0.43736	-0.9143	-1.13571
5.07323	0.227889	0.039032	-0.70174	0.407952	-0.08899		-0.17635	-0.51965	-0.58889	0.491335	0.21974		-1.25072	-1.10471	-0.86384	0.418938	-0.52812		-0.62049	0.025177	0.445415	-0.83437	-1.10941
5.08135	0.268645	0.055428	-0.70842	0.4981	-0.0844		-0.13807	-0.55884	-0.57574	0.55995	0.225266		-1.28682	-1.13685	-0.79128	0.148471	-0.5484		-0.6129	0.038162	0.435287	-0.7343	-1.05758
5.08955	0.269164	0.086542	-0.74964	0.625712	-0.07332		-0.05443	-0.57991	-0.55354	0.55133	0.257217		-1.34254	-1.19054	-0.71082	-0.07701	-0.58905		-0.62714	0.026339	0.399771	-0.63879	-1.01307
5.09775	0.230279	0.11077	-0.79254	0.809254	-0.08728		0.017431	-0.60094	-0.52994	0.498706	0.332931		-1.38778	-1.23707	-0.65051	-0.14116	-0.6391		-0.64943	-0.00523	0.345917	-0.56569	-1.01243
5.10596	0.17235	0.1129	-0.80567	1.01521	-0.11971		0.011586	-0.61582	-0.50156	0.445952	0.459128		-1.39189	-1.24521	-0.62888	-0.02529	-0.68698		-0.67339	-0.03324	0.298778	-0.51874	-1.04958
5.11416	0.11926	0.099575	-0.77254	1.18912	-0.14213		-0.06783	-0.58764	-0.4691	0.427749	0.628268		-1.35824	-1.2067	-0.65401	0.177969	-0.71445		-0.70743	-0.04313	0.26511	-0.50636	-1.09226
5.12236	0.081225	0.082625	-0.70767	1.35364	-0.14109		-0.14743	-0.47367	-0.43631	0.435287	0.811892		-1.32284	-1.15585	-0.72519	0.336768	-0.7015		-0.75328	-0.04223	0.230841	-0.52902	-1.12049
5.13057	0.050757	0.080138	-0.64507	1.57304	-0.13223		-0.15302	-0.26246	-0.40129	0.40731	0.970582		-1.31091	-1.12698	-0.82778	0.384755	-0.64332		-0.80218	-0.06308	0.178985	-0.56525	-1.14455
5.13877	0.021179	0.101595	-0.61145	1.8705	-0.1204		-0.09401	0.041614	-0.37323	0.306366	1.06975		-1.31788	-1.12869	-0.93833	0.337244	-0.55274		-0.84804	-0.12471	0.113669	-0.56896	-1.17785
5.14697	-0.00362	0.136086	-0.60909	2.18689	-0.10363		-0.03751	0.436416	-0.36587	0.150968	1.09989		-1.31923	-1.14567	-1.02081	0.239118	-0.46741		-0.88958	-0.20354	0.055952	-0.49925	-1.2066
5.15518	-0.01591	0.172335	-0.61844	2.41397	-0.08119		-0.03446	0.922656	-0.39306	0.004653	1.07826		-1.30876	-1.15202	-1.04781	0.128163	-0.41773		-0.93263	-0.26456	0.008721	-0.34741	-1.20296
5.16338	-0.01886	0.191742	-0.62058	2.50492	-0.05834		-0.08135	1.45943	-0.44721	-0.06182	1.02684		-1.29886	-1.14464	-1.0233	0.009944	-0.41747		-0.96743	-0.2902	-0.03764	-0.15026	-1.14565
5.1715	-0.03189	0.176171	-0.60116	2.49075	-0.0386		-0.12832	1.9718	-0.49895	0.001371	0.960677		-1.30623	-1.12373	-0.98932	-0.11176	-0.47332		-0.97063	-0.29341	-0.08738	0.010641	-1.03552
5.1797	-0.07628	0.114592	-0.55699	2.45786	-0.0044		-0.13951	2.35294	-0.53702	0.191072	0.881861		-1.33785	-1.09302	-0.99391	-0.23078	-0.57702		-0.91825	-0.29671	-0.12112	0.082877	-0.88879
5.18791	-0.14543	0.021243	-0.49177	2.472	0.05724		-0.11146	2.55789	-0.57604	0.424075	0.802953		-1.37922	-1.05763	-1.05254	-0.31107	-0.70654		-0.8028	-0.29766	-0.12008	0.062401	-0.73936
5.19611	-0.20702	-0.05959	-0.42497	2.53634	0.142535		-0.06256	2.61736	-0.63242	0.60802	0.741876		-1.41793	-1.02441	-1.14289	-0.31908	-0.83141		-0.66377	-0.28436	-0.09928	-0.00166	-0.63213
5.20431	-0.24176	-0.08668	-0.38628	2.6301	0.234238		-0.0121	2.58792	-0.68837	0.699476	0.699616		-1.44894	-1.01466	-1.22637	-0.26321	-0.92907		-0.55953	-0.25863	-0.09166	-0.05557	-0.58933
5.21251	-0.24159	-0.05006	-0.39137	2.71132	0.313424		0.041112	2.52184	-0.70048	0.735229	0.660443		-1.47704	-1.03007	-1.28448	-0.17671	-0.99373		-0.53492	-0.23757	-0.12107	-0.09146	-0.60394
5.22072	-0.20815	0.013658	-0.43174	2.75057	0.365086		0.115674	2.44368	-0.64843	0.775975	0.599193		-1.50913	-1.0436	-1.31412	-0.11383	-1.03333		-0.57823	-0.23146	-0.1811	-0.14271	-0.63504
5.22892	-0.14629	0.056609	-0.47284	2.74174	0.373481		0.227323	2.35671	-0.5463	0.842438	0.517164		-1.53398	-1.01974	-1.31267	-0.0957	-1.05672		-0.62864	-0.23752	-0.24254	-0.24471	-0.64784
5.23713	-0.0757	0.056806	-0.48955	2.71331	0.339941		0.366154	2.26942	-0.42893	0.921766	0.437223		-1.54348	-0.96204	-1.2758	-0.12321	-1.05626		-0.64135	-0.25001	-0.29218	-0.36355	-0.63823
5.24533	-0.03315	0.018698	-0.48157	2.69135	0.285184		0.513954	2.18491	-0.31932	0.996077	0.372474		-1.53374	-0.92194	-1.20455	-0.20896	-1.02559		-0.61697	-0.25131	-0.33775	-0.42775	-0.62701
5.25353	-0.03399	-0.04491	-0.45956	2.65968	0.24419		0.659572	2.097	-0.22545	1.08299	0.310038		-1.50966	-0.94307	-1.10539	-0.3491	-0.96932		-0.58771	-0.22356	-0.3903	-0.3997	-0.63967
5.26165	-0.072	-0.11572	-0.43608	2.58086	0.234828		0.817608	1.98426	-0.15306	1.17468	0.21986		-1.48534	-1.02036	-0.96727	-0.50631	-0.90157		-0.55787	-0.15838	-0.44419	-0.29132	-0.66982
5.26985	-0.12508	-0.17554	-0.41595	2.42922	0.250047		1.00702	1.83452	-0.10417	1.20519	0.088408		-1.47439	-1.10118	-0.78298	-0.61261	-0.83426		-0.49536	-0.07193	-0.48384	-0.15666	-0.69582
5.27806	-0.18056	-0.22854	-0.40438	2.24056	0.259721		1.24195	1.67671	-0.07333	1.12204	-0.06754		-1.48667	-1.15435	-0.55284	-0.62164	-0.78379		-0.38609	0.017137	-0.49651	-0.0303	-0.6973
5.28626	-0.2332	-0.28286	-0.39619	2.07188	0.233953		1.54492	1.5544	-0.04338	0.936819	-0.20908		-1.5134	-1.17469	-0.29399	-0.54166	-0.75873		-0.25335	0.098268	-0.479	0.066972	-0.67406
5.29446	-0.26354	-0.33649	-0.37498	1.9575	0.179077		1.94188	1.49425	-0.01448	0.724742	-0.30283		-1.54013	-1.17275	-0.03698	-0.43086	-0.75481		-0.14381	0.176237	-0.43897	0.120512	-0.64579
5.30267	-0.25818	-0.37043	-0.33497	1.87413	0.123433		2.45131	1.46416	0.002343	0.54743	-0.34451		-1.55157	-1.1475	0.180277	-0.34876	-0.76552		-0.0854	0.262787	-0.37977	0.125037	-0.62987
5.31087	-0.21691	-0.36344	-0.27778	1.77192	0.102482		3.06596	1.40434	0.002442	0.441208	-0.33574		-1.54048	-1.09638	0.320218	-0.31899	-0.75961		-0.07835	0.352849	-0.30587	0.091341	-0.63149
5.31907	-0.14898	-0.32825	-0.20757	1.63936	0.128051		3.74338	1.29224	-0.00663	0.441434	-0.27934		-1.51738	-1.03861	0.367202	-0.31568	-0.68003		-0.10948	0.436291	-0.24139	0.044026	-0.63173
5.32728	-0.06378	-0.28092	-0.11575	1.48046	0.175015		4.43286	1.15274	-0.02036	0.567821	-0.19382		-1.50779	-0.98433	0.338124	-0.28134	-0.4671		-0.16947	0.491643	-0.22466	-0.01148	-0.60851
5.33548	0.020282	-0.22161	0.025876	1.32142	0.206104		5.08053	1.02602	-0.05205	0.810074	-0.11742		-1.53009	-0.93617	0.274808	-0.19811	-0.09437		-0.23845	0.507652	-0.27854	-0.08834	-0.55911
5.34368	0.080082	-0.15244	0.250146	1.1922	0.203533		5.65579	0.931612	-0.10873	1.09968	-0.07595		-1.5758	-0.89449	0.216926	-0.1092	0.388522		-0.28601	0.494337	-0.37834	-0.19424	-0.50106
5.35189	0.097774	-0.09372	0.570662	1.11364	0.188817		6.13656	0.874986	-0.18266	1.35953	-0.07142		-1.6266	-0.86735	0.174211	-0.0997	0.872466		-0.30203	0.463957	-0.47103	-0.30123	-0.4632
5.36001	0.080946	-0.08738	0.969552	1.09486	0.186498		6.52643	0.848496	-0.24147	1.55634	-0.08103		-1.66092	-0.86968	0.137205	-0.21495	1.23235		-0.29818	0.435683	-0.51354	-0.36234	-0.46625
5.36821	0.055193	-0.14556	1.3717	1.10464	0.19431		6.83351	0.842202	-0.25505	1.69088	-0.0812		-1.67231	-0.90334	0.095937	-0.39024	1.41112		-0.30023	0.410605	-0.51461	-0.36001	-0.50601
5.37641	0.029499	-0.22566	1.69139	1.08618	0.189122		7.06357	0.827863	-0.22803	1.76946	-0.07777		-1.66614	-0.96041	0.055057	-0.52087	1.4225		-0.3193	0.378027	-0.51162	-0.31811	-0.55392
5.38462	-0.00287	-0.2505	1.88171	0.988955	0.155635		7.21775	0.768618	-0.17771	1.79722	-0.08842		-1.64227	-1.01534	0.01632	-0.55093	1.32433		-0.34312	0.326444	-0.52102	-0.28842	-0.58232
5.39282	-0.04054	-0.17624	1.95705	0.834318	0.120504		7.2918	0.654184	-0.12493	1.80614	-0.11785		-1.59361	-1.04173	-0.03219	-0.53019	1.18487		-0.35533	0.262721	-0.53635	-0.28505	-0.57987
5.40102	-0.06382	-0.04001	1.96173	0.698359	0.119497		7.28795	0.516309	-0.07385	1.81001	-0.15091		-1.51366	-1.03861	-0.09833	-0.55231	1.043		-0.34049	0.208834	-0.5401	-0.27934	-0.56081
5.40923	-0.04643	0.079678	1.931	0.624357	0.154555		7.2232	0.413741	-0.01681	1.78585	-0.1674		-1.42204	-1.0239	-0.18582	-0.64789	0.906099		-0.3096	0.174131	-0.5414	-0.23881	-0.55997
5.41743	0.005227	0.117313	1.872	0.608805	0.192826		7.11463	0.37599	0.053863	1.68246	-0.16927		-1.34906	-1.02533	-0.28374	-0.76421	0.766855		-0.28539	0.149699	-0.56167	-0.18284	-0.59053
5.42563	0.061129	0.065412	1.7899	0.619482	0.198193		6.98149	0.384625	0.132291	1.49417	-0.1645		-1.31963	-1.04961	-0.38041	-0.8035	0.619806		-0.2915	0.115405	-0.61335	-0.17464	-0.63639
5.43384	0.09237	-0.02857	1.69409	0.638589	0.170351		6.84408	0.388753	0.188282	1.3008	-0.16821		-1.34807	-1.08088	-0.46417	-0.71	0.471412		-0.33059	0.053411	-0.68973	-0.2221	-0.66902
5.44204	0.090954	-0.10657	1.59756	0.655781	0.13899		6.72703	0.350295	0.20233	1.18319	-0.18291		-1.41744	-1.10187	-0.52674	-0.46559	0.334382		-0.36812	-0.0369	-0.75916	-0.26768	-0.67605
5.45016	0.075048	-0.14292	1.50742	0.642453	0.13528		6.63027	0.28065	0.178233	1.16659	-0.18663		-1.50026	-1.1156	-0.56313	-0.08633	0.22787		-0.3805	-0.13215	-0.79471	-0.25113	-0.65999
5.45836	0.052498	-0.15004	1.42259	0.576097	0.160584		6.53024	0.215497	0.133973	1.18764	-0.1624		-1.57239	-1.14188	-0.56754	0.352094	0.151851		-0.37083	-0.2004	-0.7857	-0.17731	-0.6273
5.46657	0.027459	-0.14395	1.34471	0.467805	0.197583		6.39052	0.18326	0.074705	1.16765	-0.10642		-1.62018	-1.18711	-0.54704	0.753574	0.095319		-0.37506	-0.22802	-0.75178	-0.10582	-0.59708
5.47477	0.006364	-0.13143	1.25732	0.369917	0.226313		6.19721	0.179511	-0.00014	1.06726	-0.03911		-1.64527	-1.24206	-0.50955	1.03869	0.034672		-0.4253	-0.22743	-0.72336	-0.05729	-0.58405
5.48297	0.003844	-0.11622	1.14621	0.321645	0.24144		5.98379	0.170985	-0.08056	0.900008	0.01653		-1.65929	-1.27166	-0.4675	1.18159	-0.04632		-0.51129	-0.2331	-0.71903	-0.01217	-0.59363
5.49118	0.033675	-0.11517	1.01807	0.326056	0.265406		5.79133	0.145385	-0.1385	0.734063	0.053728		-1.67539	-1.24679	-0.44372	1.19678	-0.1468		-0.59768	-0.26605	-0.7379	0.048114	-0.61794
5.49938	0.085187	-0.1364	0.897244	0.34785	0.316293		5.63467	0.115839	-0.14918	0.621075	0.087043		-1.69285	-1.16937	-0.45436	1.14135	-0.26033		-0.64665	-0.31959	-0.76334	0.107649	-0.63449
5.50758	0.133808	-0.1615	0.813436	0.360536	0.405571		5.48852	0.10813	-0.12558	0.578712	0.138719		-1.70016	-1.07102	-0.50356	1.07574	-0.37231		-0.64895	-0.37252	-0.78161	0.150543	-0.63197
5.51579	0.158022	-0.17154	0.767362	0.370381	0.531225		5.32105	0.123811	-0.10339	0.584966	0.203851		-1.68229	-0.98396	-0.5751	1.03131	-0.48016		-0.62206	-0.4042	-0.78842	0.193759	-0.61234
5.52399	0.165244	-0.16182	0.733627	0.380475	0.684972		5.13253	0.140929	-0.1044	0.595893	0.263935		-1.64043	-0.90515	-0.64273	1.01245	-0.58215		-0.59755	-0.42185	-0.78147	0.245944	-0.58794
5.53219	0.183547	-0.15766	0.678064	0.406942	0.846731		4.95069	0.13629	-0.11767	0.576751	0.301955		-1.59528	-0.81896	-0.68132	0.988254	-0.66843		-0.58813	-0.4365	-0.75495	0.289952	-0.57313
5.54031	0.224238	-0.18062	0.590201	0.455594	0.975552		4.80217	0.103309	-0.11758	0.510501	0.310986		-1.56623	-0.72017	-0.67737	0.932907	-0.72977		-0.57653	-0.44644	-0.7114	0.278525	-0.58276
5.54852	0.271184	-0.22029	0.491292	0.500585	1.04477		4.68323	0.058994	-0.10462	0.412672	0.289637		-1.56311	-0.63702	-0.64289	0.837052	-0.76954		-0.54365	-0.4445	-0.66393	0.194345	-0.62489
5.55672	0.296781	-0.2526	0.399057	0.485354	1.04868		4.56428	0.020266	-0.10173	0.305903	0.23494		-1.57453	-0.61003	-0.60139	0.708037	-0.80905		-0.49549	-0.42677	-0.62193	0.086656	-0.68442
5.56492	0.292585	-0.25743	0.318925	0.368847	1.00513		4.43451	-0.01121	-0.13254	0.211225	0.152732		-1.5855	-0.64502	-0.57981	0.54705	-0.8584		-0.4675	-0.40966	-0.58919	0.051043	-0.73986
5.57312	0.272093	-0.23553	0.249248	0.187838	0.945556		4.30355	-0.04663	-0.1998	0.16168	0.063137		-1.57918	-0.71485	-0.58828	0.345198	-0.90904		-0.4819	-0.41228	-0.55706	0.144996	-0.78042
5.58133	0.260643	-0.19704	0.195065	0.019384	0.901169		4.19142	-0.08515	-0.28261	0.166841	0.006214		-1.55237	-0.77309	-0.62475	0.113206	-0.94857		-0.5277	-0.44298	-0.51751	0.326197	-0.82618
5.58953	0.271834	-0.16329	0.156552	-0.04829	0.904867		4.09667	-0.11117	-0.36299	0.210286	0.006174		-1.52616	-0.79313	-0.67863	-0.12936	-0.96986		-0.57181	-0.49368	-0.48378	0.509131	-0.89784
5.59773	0.305893	-0.1633	0.125666	0.008422	0.955137		4.00101	-0.11807	-0.42913	0.261078	0.056604		-1.52088	-0.78074	-0.73898	-0.35779	-0.98634		-0.58637	-0.54565	-0.47933	0.633714	-0.99171
5.60594	0.356386	-0.20542	0.083346	0.120661	1.00612		3.89759	-0.11187	-0.47807	0.30318	0.120279		-1.54862	-0.75883	-0.7899	-0.53071	-1.01601		-0.57496	-0.6009	-0.51543	0.729206	-1.08549
5.61414	0.40337	-0.26965	0.010205	0.218157	0.990957		3.7998	-0.11824	-0.50909	0.329813	0.142741		-1.59197	-0.76108	-0.80564	-0.60981	-1.07274		-0.5499	-0.67707	-0.56909	0.854386	-1.15391
5.62234	0.428954	-0.32013	-0.0932	0.261982	0.884578		3.7275	-0.1498	-0.52282	0.358717	0.091708		-1.62237	-0.79659	-0.77783	-0.56879	-1.15959		-0.53553	-0.78125	-0.604	1.01312	-1.18578
5.63047	0.428519	-0.33514	-0.2131	0.274205	0.734547		3.68353	-0.1927	-0.52798	0.406169	-0.01915		-1.63111	-0.8537	-0.72442	-0.44776	-1.26525		-0.55509	-0.88095	-0.60034	1.15457	-1.17718
5.63867	0.424583	-0.31832	-0.31455	0.307222	0.61381		3.66057	-0.22803	-0.52909	0.45846	-0.12416		-1.62366	-0.90926	-0.67846	-0.33304	-1.3709		-0.60397	-0.92769	-0.56871	1.22294	-1.14017
5.64687	0.448121	-0.28003	-0.37464	0.395254	0.556443		3.65153	-0.25623	-0.52955	0.493629	-0.16038		-1.60847	-0.94416	-0.65738	-0.30964	-1.45723		-0.65084	-0.90918	-0.54025	1.24895	-1.08912
5.65508	0.493287	-0.21593	-0.40157	0.514448	0.541402		3.66202	-0.30307	-0.53231	0.482192	-0.12108		-1.57781	-0.94453	-0.65101	-0.4	-1.52117		-0.65568	-0.86297	-0.53482	1.29885	-1.02846
5.66328	0.528496	-0.11492	-0.42222	0.613632	0.541091		3.71231	-0.36597	-0.53444	0.419414	-0.04269		-1.53198	-0.91389	-0.64969	-0.54338	-1.56099		-0.61591	-0.83724	-0.54836	1.37366	-0.97468
5.67148	0.530464	0.015153	-0.45585	0.668967	0.542986		3.81836	-0.42143	-0.53109	0.330467	0.030988		-1.48248	-0.87714	-0.64836	-0.67036	-1.57203		-0.56703	-0.82836	-0.56585	1.41199	-0.95211
5.67968	0.52319	0.165435	-0.48723	0.67899	0.549042		3.96814	-0.4512	-0.51554	0.254016	0.0876		-1.43285	-0.85485	-0.64889	-0.74662	-1.54922		-0.54873	-0.80025	-0.57605	1.35386	-0.98746
5.68789	0.547397	0.327743	-0.49633	0.663308	0.563923		4.11868	-0.45419	-0.48708	0.219048	0.126196		-1.38062	-0.85634	-0.64772	-0.77436	-1.50014		-0.57343	-0.73523	-0.58286	1.22288	-1.07915
5.69609	0.598006	0.486588	-0.48406	0.63671	0.58991		4.24529	-0.45535	-0.4553	0.21516	0.135565		-1.31961	-0.87705	-0.63249	-0.74059	-1.43996		-0.62206	-0.66993	-0.59372	1.08569	-1.19191
5.70429	0.639132	0.616893	-0.46667	0.611492	0.638154		4.36418	-0.46874	-0.44426	0.233578	0.105735		-1.25541	-0.91306	-0.60194	-0.63363	-1.3647		-0.67638	-0.65831	-0.62364	1.00571	-1.29006
5.7125	0.637099	0.680594	-0.46338	0.604953	0.703671		4.51306	-0.49565	-0.46834	0.272695	0.039052		-1.2075	-0.96402	-0.55626	-0.48819	-1.26056		-0.72709	-0.70841	-0.68488	0.986502	-1.36965
5.72062	0.596571	0.669464	-0.47297	0.615654	0.760806		4.70416	-0.52904	-0.51744	0.331644	-0.03939		-1.19417	-1.0124	-0.5029	-0.37394	-1.12271		-0.77139	-0.78882	-0.75842	0.975626	-1.46001
5.72882	0.533946	0.602357	-0.48212	0.620802	0.770082		4.89065	-0.56586	-0.55894	0.403696	-0.10452		-1.20647	-1.03206	-0.44901	-0.34951	-0.98209		-0.79035	-0.85076	-0.78572	0.928908	-1.56608
5.73702	0.462449	0.522625	-0.48735	0.584859	0.708481		5.03058	-0.60192	-0.56588	0.463537	-0.14942		-1.21933	-0.99813	-0.41249	-0.4005	-0.89731		-0.76297	-0.88342	-0.71123	0.832244	-1.64964
5.74523	0.398616	0.46427	-0.49806	0.505222	0.603016		5.1189	-0.62381	-0.55017	0.488874	-0.18293		-1.22304	-0.91775	-0.4142	-0.45768	-0.89455		-0.69069	-0.90544	-0.54349	0.708304	-1.67065
5.75343	0.366057	0.435774	-0.52971	0.40133	0.495855		5.17652	-0.62454	-0.54489	0.451885	-0.20769		-1.23015	-0.83815	-0.45866	-0.44661	-0.95606		-0.6022	-0.93155	-0.3458	0.599651	-1.63465
5.76163	0.380605	0.431989	-0.58967	0.30318	0.417451		5.20762	-0.61197	-0.57512	0.355923	-0.20872		-1.2578	-0.80454	-0.5333	-0.33831	-1.02583		-0.54288	-0.96594	-0.18728	0.544354	-1.58168
5.76984	0.419978	0.41975	-0.66919	0.253695	0.36997		5.19331	-0.60504	-0.63219	0.237775	-0.17454		-1.29448	-0.83251	-0.60971	-0.15599	-1.05787		-0.53814	-0.99714	-0.08693	0.547213	-1.53678
5.77804	0.447199	0.371599	-0.73735	0.269128	0.337112		5.12632	-0.60574	-0.69065	0.135107	-0.11452		-1.30955	-0.8932	-0.6593	0.067181	-1.04232		-0.5844	-1.041	-0.03189	0.580392	-1.49605
5.78624	0.442243	0.288381	-0.76442	0.346768	0.308441		5.01101	-0.59624	-0.73775	0.059762	-0.07063		-1.28565	-0.95033	-0.66326	0.269568	-0.99187		-0.64187	-1.12142	-0.01668	0.606266	-1.44593
5.79445	0.417296	0.197964	-0.73982	0.43342	0.278764		4.86767	-0.56449	-0.7631	0.006912	-0.08209		-1.23932	-0.97878	-0.625	0.405348	-0.9242		-0.66607	-1.24104	-0.03707	0.574753	-1.3985
5.80265	0.393368	0.137435	-0.67596	0.4511	0.247072		4.72274	-0.52556	-0.75804	-0.00927	-0.15307		-1.21494	-0.97702	-0.5625	0.46148	-0.84789		-0.64694	-1.36554	-0.0703	0.461448	-1.37403
5.81077	0.372253	0.10991	-0.60378	0.371843	0.192958		4.59013	-0.51964	-0.71106	0.023783	-0.24126		-1.22393	-0.96868	-0.49273	0.453787	-0.77783		-0.59734	-1.44505	-0.0678	0.284681	-1.37456
5.81897	0.354197	0.105133	-0.54781	0.233375	0.091728		4.48264	-0.57081	-0.63347	0.095942	-0.28548		-1.23991	-0.97289	-0.42248	0.425275	-0.71974		-0.536	-1.46334	-0.0195	0.102137	-1.39073
5.82718	0.335913	0.109399	-0.53021	0.116702	-0.05597		4.38786	-0.66735	-0.56466	0.162465	-0.27551		-1.22928	-0.99864	-0.3459	0.408796	-0.66455		-0.45743	-1.43525	0.03587	-0.01502	-1.41483
5.83538	0.31259	0.108072	-0.54615	0.071188	-0.21866		4.27625	-0.76599	-0.54265	0.212152	-0.24718		-1.18487	-1.03826	-0.27935	0.420044	-0.6045		-0.33973	-1.37418	0.044768	-0.04468	-1.45624
5.84358	0.275659	0.096256	-0.56745	0.0785	-0.35273		4.12224	-0.81785	-0.583	0.302074	-0.24655		-1.13827	-1.07156	-0.24996	0.425727	-0.54044		-0.18688	-1.26044	-0.01485	-0.00396	-1.52006
5.85179	0.223128	0.088854	-0.5566	0.072912	-0.44264		3.93314	-0.80105	-0.66677	0.47356	-0.28386		-1.11699	-1.07574	-0.26486	0.375148	-0.48064		-0.03442	-1.0694	-0.10626	0.04468	-1.59311
5.85999	0.177	0.109735	-0.49921	0.010871	-0.49638		3.73207	-0.71729	-0.75908	0.691498	-0.3283		-1.12199	-1.04257	-0.29986	0.258439	-0.42012		0.067139	-0.81312	-0.16806	0.053202	-1.65284
5.86819	0.148474	0.164633	-0.43144	-0.08604	-0.52737		3.53618	-0.60522	-0.82301	0.858882	-0.34687		-1.13009	-0.99519	-0.31685	0.113503	-0.34768		0.096797	-0.55248	-0.15042	0.024009	-1.67119
5.87639	0.138361	0.236933	-0.39635	-0.16838	-0.53469		3.35761	-0.51061	-0.83204	0.93733	-0.30527		-1.12596	-0.97187	-0.30884	-0.00067	-0.25514		0.070826	-0.36471	-0.05469	-0.00951	-1.64174
5.8846	0.136796	0.290233	-0.41307	-0.18398	-0.52306		3.20962	-0.45603	-0.7883	0.989633	-0.18481		-1.11934	-0.99126	-0.29683	-0.06699	-0.15338		0.028947	-0.29776	0.073909	0.010595	-1.57983
5.8928	0.131438	0.310538	-0.4597	-0.1312	-0.5147		3.10992	-0.43466	-0.72668	1.07985	0.009374		-1.12568	-1.02821	-0.30117	-0.10117	-0.06323		0.009217	-0.34365	0.18581	0.122728	-1.52297
5.901	0.121299	0.316337	-0.50506	-0.05858	-0.52835		3.05869	-0.41979	-0.69257	1.22072	0.231269		-1.147	-1.04677	-0.32091	-0.1152	0.006326		0.020214	-0.45305	0.250444	0.332111	-1.50247
5.90913	0.102236	0.326934	-0.54399	-0.02617	-0.56982		3.04146	-0.39296	-0.69664	1.35315	0.41592		-1.16472	-1.03538	-0.34395	-0.09327	0.053125		0.050247	-0.56392	0.267979	0.612743	-1.50859
5.91733	0.07512	0.347181	-0.58521	-0.05368	-0.61958		3.0428	-0.35033	-0.71494	1.40712	0.528468		-1.15767	-1.014	-0.37655	-0.02718	0.09084		0.083812	-0.62994	0.248405	0.915448	-1.51329
5.92553	0.046737	0.366056	-0.64157	-0.11213	-0.65623		3.05362	-0.31216	-0.71726	1.34162	0.575307		-1.11488	-1.00865	-0.42533	0.058525	0.138705		0.119902	-0.63029	0.201186	1.16963	-1.49284
5.93374	0.035598	0.379177	-0.70779	-0.1644	-0.67184		3.07431	-0.31257	-0.69555	1.17901	0.58836		-1.04016	-1.01458	-0.48133	0.14205	0.216394		0.165341	-0.57596	0.124513	1.30848	-1.45225
5.94194	0.050828	0.375698	-0.77213	-0.18691	-0.65777		3.08159	-0.36538	-0.67178	1.00693	0.586604		-0.95956	-1.01839	-0.51635	0.215386	0.327272		0.205168	-0.48028	0.030622	1.32836	-1.41141
5.95014	0.07436	0.353752	-0.82803	-0.20852	-0.61999		3.05071	-0.45197	-0.666	0.914585	0.572213		-0.90296	-1.01805	-0.50097	0.283966	0.449322		0.204956	-0.35777	-0.05162	1.27417	-1.38636
5.95835	0.079153	0.325621	-0.86708	-0.26181	-0.58175		2.97864	-0.52821	-0.68565	0.948578	0.554389		-0.88027	-1.01798	-0.42325	0.331929	0.57096		0.16014	-0.22981	-0.10133	1.19233	-1.37757
5.96655	0.052647	0.298774	-0.88595	-0.31768	-0.57755		2.88857	-0.57235	-0.72222	1.08084	0.545325		-0.86702	-1.02058	-0.28932	0.323809	0.69242		0.121686	-0.10492	-0.11283	1.09729	-1.37025
5.97475	0.015444	0.285412	-0.89266	-0.33091	-0.61287		2.80005	-0.60154	-0.76397	1.26398	0.545391		-0.83818	-1.01726	-0.12506	0.252934	0.814708		0.134806	0.000416	-0.10142	0.969723	-1.35354
5.98295	-0.00158	0.288811	-0.90604	-0.28947	-0.65652		2.70845	-0.64769	-0.8011	1.48026	0.541521		-0.78813	-1.01315	0.041825	0.14966	0.926407		0.201007	0.071862	-0.08534	0.804222	-1.32078
5.99116	0.027901	0.301903	-0.93419	-0.24735	-0.68861		2.61908	-0.71592	-0.82696	1.70967	0.535379		-0.72595	-1.01496	0.201147	0.079083	1.0059		0.277979	0.105021	-0.0752	0.638709	-1.27737
5.99928	0.093962	0.313784	-0.9733	-0.24181	-0.71076		2.54047	-0.78188	-0.8508	1.88179	0.53302		-0.66499	-1.0366	0.359865	0.061319	1.04548		0.320007	0.113682	-0.06604	0.533122	-1.23375
6.00748	0.158113	0.32274	-1.00109	-0.24868	-0.73428		2.4805	-0.81703	-0.8735	1.90274	0.537473		-0.60778	-1.09003	0.521811	0.060725	1.05027		0.322363	0.13575	-0.0503	0.491928	-1.19636
6.01568	0.197018	0.344205	-0.99919	-0.22419	-0.75437		2.4396	-0.79933	-0.88089	1.76048	0.545179		-0.57311	-1.16301	0.669264	0.038218	1.02804		0.306038	0.206603	-0.04027	0.494075	-1.16109
6.02389	0.212924	0.38701	-0.96809	-0.15082	-0.75095		2.40823	-0.74142	-0.8596	1.51657	0.534571		-0.58393	-1.22238	0.773931	-0.0073	0.989804		0.285615	0.332187	-0.05032	0.525783	-1.11796
6.03209	0.232409	0.442243	-0.91679	-0.06563	-0.70983		2.38327	-0.67901	-0.80801	1.26694	0.495054		-0.63059	-1.2381	0.821967	-0.0153	0.964493		0.251647	0.470671	-0.08755	0.58061	-1.07303
6.04029	0.267865	0.478164	-0.86672	-0.02124	-0.63728		2.36383	-0.65463	-0.73895	1.06467	0.434665		-0.67696	-1.20483	0.822937	0.049727	1.00055		0.19962	0.566754	-0.15075	0.677618	-1.02735
6.0485	0.305822	0.46726	-0.83767	-0.04002	-0.55275		2.33841	-0.69075	-0.66063	0.900626	0.381558		-0.69795	-1.13768	0.798949	0.151729	1.13066		0.155094	0.599173	-0.22653	0.805026	-0.97347
6.0567	0.330139	0.414871	-0.84612	-0.10291	-0.47195		2.27983	-0.75982	-0.5778	0.756571	0.36129		-0.72061	-1.06477	0.767461	0.214887	1.34334		0.145512	0.590294	-0.29874	0.910303	-0.90644
6.0649	0.333146	0.346342	-0.89554	-0.17005	-0.41017		2.18729	-0.82279	-0.49922	0.613478	0.372163		-0.7756	-1.02026	0.752552	0.177791	1.58461		0.179579	0.575243	-0.34941	0.930642	-0.82728
6.07311	0.327314	0.279337	-0.96264	-0.21073	-0.36883		2.09452	-0.85959	-0.44243	0.479921	0.392531		-0.85538	-1.02311	0.768321	0.041713	1.80129		0.221508	0.576636	-0.37001	0.832806	-0.7484
6.08131	0.315603	0.213375	-1.01926	-0.21277	-0.34424		2.03439	-0.88007	-0.42459	0.382805	0.384686		-0.91797	-1.06873	0.818378	-0.14699	1.97204		0.227063	0.601417	-0.36528	0.639031	-0.67074
6.08943	0.295118	0.155589	-1.04575	-0.2153	-0.33896		2.01992	-0.89794	-0.44051	0.351738	0.333666		-0.91785	-1.11937	0.883031	-0.31406	2.11608		0.202168	0.635606	-0.34966	0.404164	-0.58821
6.09763	0.273347	0.120092	-1.04133	-0.27516	-0.35801		2.02696	-0.91467	-0.46869	0.405336	0.254169		-0.8494	-1.13265	0.927313	-0.39163	2.2702		0.189677	0.666513	-0.34022	0.225708	-0.48916
6.10584	0.267566	0.120595	-1.02273	-0.38644	-0.39912		2.01697	-0.94087	-0.48134	0.509086	0.179256		-0.74213	-1.1069	0.923714	-0.34685	2.43943		0.220503	0.684674	-0.33498	0.172375	-0.37272
6.11404	0.299502	0.151555	-1.00681	-0.47176	-0.43312		1.95799	-0.97606	-0.45907	0.615773	0.1494		-0.6416	-1.08846	0.863712	-0.22012	2.60098		0.275531	0.678039	-0.33333	0.228281	-0.24123
6.12224	0.357724	0.17919	-1.00299	-0.46169	-0.43823		1.85622	-1.00862	-0.39275	0.691439	0.186697		-0.58556	-1.10957	0.765236	-0.11606	2.71468		0.319087	0.648987	-0.34056	0.310727	-0.08798
6.13045	0.400571	0.182334	-0.99791	-0.36181	-0.42464		1.76153	-1.01616	-0.29339	0.742137	0.288179		-0.5949	-1.14698	0.656991	-0.11127	2.76809		0.334429	0.595067	-0.36643	0.336016	0.081417
6.13865	0.393862	0.162167	-0.96955	-0.22735	-0.42698		1.71616	-0.97867	-0.19399	0.784547	0.422288		-0.65672	-1.1586	0.576426	-0.21858	2.77717		0.330204	0.52739	-0.41167	0.293524	0.237908
6.14685	0.344935	0.14082	-0.90346	-0.12874	-0.4634		1.72332	-0.90134	-0.12961	0.796865	0.551725		-0.72538	-1.12374	0.558126	-0.37157	2.75328		0.310128	0.470822	-0.46101	0.214913	0.344731
6.15506	0.288675	0.124694	-0.80463	-0.07645	-0.50621		1.73449	-0.80618	-0.12077	0.749948	0.651121		-0.76392	-1.06963	0.61363	-0.51117	2.69808		0.264696	0.460082	-0.49549	0.12104	0.386672
6.16326	0.250809	0.092034	-0.70159	-0.04692	-0.52187		1.69885	-0.72844	-0.14715	0.622978	0.722886		-0.76237	-1.03895	0.732811	-0.63211	2.59757		0.195133	0.50177	-0.50084	0.014522	0.383185
6.17146	0.233253	0.037026	-0.62256	-0.04439	-0.49473		1.60005	-0.69832	-0.16982	0.419021	0.775058		-0.74144	-1.0465	0.888373	-0.76058	2.45922		0.110264	0.549352	-0.48657	-0.08437	0.366588
6.17958	0.219945	-0.02864	-0.57675	-0.07042	-0.42667		1.45132	-0.7338	-0.16185	0.170919	0.809533		-0.72761	-1.08194	1.05698	-0.88972	2.31044		0.033051	0.562357	-0.47943	-0.13819	0.354727
6.18779	0.205331	-0.08483	-0.5566	-0.11165	-0.33393		1.29843	-0.81894	-0.12915	-0.05777	0.830544		-0.73577	-1.11681	1.21988	-0.95514	2.17265		-0.00832	0.531991	-0.51018	-0.14985	0.342206
6.19599	0.197693	-0.13193	-0.54187	-0.13025	-0.23521		1.17585	-0.90508	-0.10989	-0.19142	0.844571		-0.75477	-1.12864	1.3585	-0.92871	2.05981		0.009953	0.486488	-0.58624	-0.16702	0.31734
6.20419	0.205598	-0.1847	-0.51271	-0.10107	-0.16385		1.10084	-0.94379	-0.12763	-0.17311	0.865416		-0.75017	-1.09962	1.44782	-0.83572	1.96463		0.082849	0.4536	-0.67619	-0.25058	0.279639
6.2124	0.22733	-0.24282	-0.4592	-0.03599	-0.14078		1.0673	-0.91664	-0.17351	-0.00361	0.88695		-0.71216	-1.02492	1.46469	-0.74	1.88052		0.155766	0.427834	-0.74186	-0.38921	0.242445
6.2206	0.248257	-0.29247	-0.38557	0.029907	-0.15167		1.04387	-0.84803	-0.22037	0.212937	0.877574		-0.65743	-0.92648	1.40984	-0.69858	1.79944		0.170365	0.396247	-0.75748	-0.5262	0.215701
6.2288	0.260948	-0.31518	-0.30126	0.049608	-0.15315		0.999514	-0.77356	-0.25497	0.353438	0.822155		-0.61535	-0.8317	1.31033	-0.71745	1.72459		0.111297	0.364257	-0.73936	-0.62417	0.181196
6.23701	0.259487	-0.30854	-0.22953	0.014878	-0.1172		0.919762	-0.71854	-0.29062	0.375517	0.734561		-0.60637	-0.75873	1.20817	-0.77364	1.67948		0.033653	0.351536	-0.72792	-0.67522	0.126414
6.24521	0.249939	-0.27853	-0.18709	-0.05013	-0.0603		0.81173	-0.68659	-0.34451	0.318375	0.657634		-0.62025	-0.69897	1.12261	-0.82781	1.69015		0.003846	0.360085	-0.74241	-0.69001	0.065812
6.25341	0.238047	-0.23728	-0.1782	-0.10172	-0.02823		0.696795	-0.6705	-0.42714	0.238964	0.618998		-0.63773	-0.63375	1.04697	-0.85197	1.75832		0.031558	0.366422	-0.76932	-0.66288	0.040858
6.26161	0.215464	-0.1983	-0.19431	-0.10554	-0.05563		0.609158	-0.67201	-0.52743	0.152311	0.616931		-0.64797	-0.56162	0.964243	-0.84958	1.84734		0.091624	0.345066	-0.77	-0.59555	0.084065
6.26974	0.17926	-0.16232	-0.21472	-0.05962	-0.13308		0.565745	-0.68381	-0.62405	0.063067	0.634874		-0.65613	-0.49987	0.862622	-0.85554	1.91082		0.144536	0.300844	-0.72653	-0.50274	0.181161
6.27794	0.135608	-0.11762	-0.22994	0.038574	-0.2286		0.557302	-0.69709	-0.70087	-0.03413	0.656136		-0.66125	-0.46853	0.753708	-0.90742	1.91515		0.163678	0.267586	-0.6521	-0.41414	0.290177
6.28614	0.112343	-0.055	-0.24341	0.206314	-0.31623		0.560348	-0.69853	-0.75424	-0.1373	0.685032		-0.65415	-0.46458	0.648411	-0.99117	1.85794		0.147451	0.269976	-0.58451	-0.37518	0.372956
6.29435	0.129457	0.008947	-0.27243	0.463263	-0.38747		0.558309	-0.67401	-0.78396	-0.22274	0.72498		-0.64101	-0.48621	0.551113	-1.06945	1.75099		0.11129	0.304726	-0.55297	-0.3924	0.418472
6.30255	0.174487	0.060606	-0.3196	0.761124	-0.4439		0.555197	-0.62575	-0.79732	-0.26061	0.772096		-0.63086	-0.52582	0.460713	-1.1091	1.60638		0.08171	0.33663	-0.55834	-0.44861	0.428141
6.31075	0.218731	0.117342	-0.36617	0.991464	-0.47127		0.554658	-0.56387	-0.8073	-0.22185	0.819757		-0.62995	-0.56683	0.37873	-1.09473	1.4519		0.073735	0.334564	-0.58408	-0.51271	0.39437
6.31896	0.239911	0.216088	-0.39987	1.06009	-0.45912		0.558698	-0.50818	-0.8165	-0.11826	0.860632		-0.63226	-0.59131	0.307978	-1.0227	1.32129		0.075893	0.294975	-0.60586	-0.55388	0.319784
6.32716	0.243918	0.372197	-0.41303	0.96986	-0.41522		0.564654	-0.47063	-0.81601	-0.00728	0.902581		-0.63197	-0.59719	0.246366	-0.91448	1.24436		0.054048	0.240032	-0.60846	-0.56225	0.224536
6.33536	0.248094	0.538079	-0.40929	0.836933	-0.36757		0.566564	-0.44703	-0.79029	0.063983	0.957463		-0.64678	-0.60794	0.194215	-0.82898	1.22328		-0.00529	0.211904	-0.58799	-0.54483	0.147005
6.34356	0.264637	0.652412	-0.38981	0.782847	-0.3405		0.564472	-0.42846	-0.73989	0.107594	1.02722		-0.71209	-0.64038	0.150816	-0.82076	1.24615		-0.08009	0.236679	-0.54894	-0.52556	0.11801
6.35177	0.293248	0.667874	-0.35384	0.86095	-0.32991		0.547683	-0.41664	-0.6971	0.182012	1.08662		-0.83303	-0.6879	0.10935	-0.89308	1.30116		-0.14218	0.305234	-0.49502	-0.52691	0.147133
6.35989	0.324469	0.591482	-0.30426	1.0326	-0.33351		0.51109	-0.42736	-0.69219	0.29393	1.10552		-0.96156	-0.70955	0.056065	-0.97181	1.36743		-0.18169	0.381275	-0.42929	-0.56313	0.219614
6.36809	0.348098	0.483802	-0.24514	1.23919	-0.3555		0.458552	-0.45321	-0.72645	0.404005	1.07691		-1.0447	-0.68219	-0.02604	-0.98594	1.4243		-0.21534	0.434357	-0.35828	-0.59492	0.304779
6.37629	0.357392	0.405798	-0.17493	1.43623	-0.41706		0.396057	-0.4702	-0.76567	0.467104	1.01505		-1.05765	-0.63422	-0.12871	-0.91827	1.43369		-0.24994	0.470367	-0.28699	-0.55955	0.383243
6.3845	0.362023	0.387805	-0.08001	1.58109	-0.52224		0.334504	-0.46384	-0.78195	0.467686	0.936379		-1.01638	-0.60896	-0.22088	-0.7941	1.37022		-0.27817	0.504661	-0.23063	-0.44757	0.454779
6.3927	0.37311	0.407125	0.047666	1.65861	-0.62406		0.282434	-0.45942	-0.78187	0.44273	0.84854		-0.95907	-0.63881	-0.28209	-0.67785	1.24863		-0.28111	0.540256	-0.20264	-0.30323	0.537518
6.4009	0.392706	0.420655	0.207612	1.65967	-0.66722		0.252316	-0.49305	-0.79169	0.453609	0.76345		-0.90824	-0.71503	-0.32341	-0.60586	1.11269		-0.25354	0.566351	-0.2047	-0.18033	0.636661
6.40911	0.400798	0.406914	0.389501	1.59475	-0.63872		0.247731	-0.56471	-0.82915	0.527931	0.686708		-0.87195	-0.80443	-0.36801	-0.57857	1.01186		-0.21711	0.576583	-0.22608	-0.08361	0.726508
6.41731	0.372422	0.374487	0.57046	1.50334	-0.58471		0.255369	-0.64144	-0.87897	0.617021	0.625193		-0.84658	-0.86911	-0.42034	-0.56048	0.963572		-0.19697	0.592076	-0.24091	-0.00769	0.760507
6.42551	0.315162	0.345197	0.71719	1.42741	-0.55713		0.255765	-0.68584	-0.9191	0.650467	0.592104		-0.83527	-0.87903	-0.47063	-0.50422	0.953481		-0.21253	0.637481	-0.23729	0.032829	0.71183
6.43372	0.256161	0.323054	0.798308	1.40801	-0.56541		0.236007	-0.69656	-0.94742	0.582172	0.598438		-0.84169	-0.83607	-0.50436	-0.39653	0.95309		-0.25607	0.703857	-0.22093	-0.00327	0.607567
6.44192	0.217393	0.306862	0.811644	1.44774	-0.57902		0.206	-0.68866	-0.97281	0.450957	0.650584		-0.86805	-0.76919	-0.52407	-0.25389	0.944059		-0.30265	0.753361	-0.20993	-0.13387	0.492381
6.45012	0.197505	0.297381	0.78152	1.51519	-0.56984		0.185392	-0.67734	-1.00422	0.361083	0.726563		-0.91543	-0.73135	-0.53798	-0.12194	0.927885		-0.32219	0.758167	-0.22548	-0.27735	0.399572
6.45824	0.179137	0.288731	0.745363	1.56228	-0.54617		0.192004	-0.67833	-1.03299	0.363889	0.790636		-0.96837	-0.75249	-0.54813	-0.0328	0.906039		-0.29636	0.732138	-0.27187	-0.33949	0.337722
6.46645	0.152605	0.263911	0.724198	1.56361	-0.52792		0.215145	-0.70535	-1.0451	0.429972	0.835135		-1.01912	-0.81465	-0.55871	0.010836	0.870372		-0.24753	0.718196	-0.32992	-0.29359	0.301717
6.47465	0.121436	0.208977	0.709201	1.5337	-0.51535		0.224992	-0.75913	-1.03143	0.491109	0.883259		-1.06594	-0.88662	-0.5694	0.020324	0.805862		-0.21205	0.746364	-0.36972	-0.19633	0.287173
6.48285	0.108874	0.134729	0.688008	1.48253	-0.48272		0.1934	-0.80343	-0.99689	0.501049	0.961618		-1.1132	-0.94632	-0.57985	0.023593	0.718804		-0.208	0.795616	-0.38531	-0.12359	0.286823
6.49106	0.123365	0.06348	0.650619	1.40183	-0.42007		0.112362	-0.80164	-0.95423	0.451766	1.05562		-1.1651	-0.99968	-0.57504	0.034472	0.629162		-0.22533	0.829349	-0.39673	-0.08376	0.318757
6.49926	0.151527	0.016896	0.59871	1.2821	-0.34813		0.012937	-0.75953	-0.9197	0.3644	1.13622		-1.21746	-1.04974	-0.53512	0.045244	0.553865		-0.24332	0.827191	-0.41863	-0.04606	0.414716
6.50746	0.173129	0.000245	0.543185	1.16329	-0.28506		-0.05616	-0.71136	-0.91153	0.283895	1.20277		-1.26618	-1.07738	-0.44941	0.032475	0.49836		-0.2553	0.798508	-0.44767	0.008746	0.586707
6.51567	0.163971	0.015044	0.496821	1.12271	-0.23328		-0.05872	-0.69777	-0.9402	0.231021	1.28552		-1.2998	-1.0532	-0.32061	-0.01481	0.453039		-0.26465	0.764821	-0.45386	0.047965	0.807725
6.52387	0.118532	0.070357	0.467535	1.20448	-0.18343		-0.00597	-0.73065	-1.00462	0.20937	1.40182		-1.30529	-0.98525	-0.17856	-0.08204	0.416298		-0.27706	0.746364	-0.38954	0.039444	1.01798
6.53207	0.049952	0.16774	0.447344	1.36378	-0.13913		0.057109	-0.79551	-1.08315	0.196398	1.52693		-1.28058	-0.92252	-0.06024	-0.14088	0.382665		-0.28982	0.7649	-0.2128	0.006633	1.16864
6.54027	-0.01986	0.309517	0.423477	1.50764	-0.11748		0.093968	-0.85291	-1.14692	0.152775	1.61978		-1.24573	-0.89923	-0.00047	-0.18106	0.348217		-0.30004	0.815645	0.087911	0.002303	1.2536
6.5484	-0.07299	0.477413	0.388066	1.60043	-0.12768		0.092279	-0.86916	-1.17994	0.068108	1.67387		-1.22711	-0.91238	-0.00933	-0.22348	0.309879		-0.3019	0.881282	0.480139	0.064652	1.29631
6.5566	-0.09395	0.639575	0.340913	1.66329	-0.16802		0.071067	-0.84635	-1.18042	-0.05156	1.71734		-1.2309	-0.92494	-0.06943	-0.27988	0.267725		-0.29284	0.922501	0.886323	0.183297	1.31924
6.5648	-0.07444	0.759815	0.291941	1.73185	-0.22072		0.049698	-0.81462	-1.16145	-0.18489	1.76543		-1.24839	-0.91303	-0.15563	-0.34199	0.230633		-0.27552	0.898703	1.23517	0.32344	1.33793
6.57301	-0.02801	0.811621	0.25231	1.81753	-0.2752		0.035247	-0.79859	-1.13746	-0.30956	1.79409		-1.26045	-0.88019	-0.23933	-0.38189	0.193654		-0.25336	0.810621	1.49382	0.44723	1.37573
6.58121	0.021776	0.802533	0.233391	1.90197	-0.32227		0.025251	-0.79187	-1.12025	-0.39861	1.76832		-1.26275	-0.83827	-0.3001	-0.3846	0.152772		-0.23703	0.692206	1.69083	0.540254	1.44354
6.58941	0.051666	0.750108	0.24104	1.98638	-0.35752		0.003571	-0.77182	-1.11088	-0.44363	1.67803		-1.25626	-0.79295	-0.32092	-0.36943	0.108438		-0.22764	0.598361	1.87651	0.627615	1.53149
6.59762	0.050796	0.676371	0.271498	2.06663	-0.38816		-0.03921	-0.73094	-1.09423	-0.45566	1.55694		-1.24091	-0.73915	-0.31123	-0.3359	0.064389		-0.22546	0.559492	2.07349	0.757216	1.61867
6.60582	0.017697	0.594531	0.315161	2.12375	-0.41763		-0.10492	-0.69023	-1.06036	-0.44247	1.45202		-1.21891	-0.69245	-0.29962	-0.27449	0.03118		-0.23289	0.571262	2.27693	0.951727	1.69321
6.61402	-0.03831	0.50849	0.363273	2.13075	-0.44115		-0.17551	-0.67494	-1.00946	-0.4113	1.40457		-1.19102	-0.67141	-0.30881	-0.17994	0.010567		-0.24856	0.606018	2.48861	1.16925	1.74394
6.62223	-0.09444	0.434199	0.408059	2.09552	-0.44061		-0.22444	-0.68419	-0.97038	-0.3701	1.42413		-1.16366	-0.67177	-0.33542	-0.07523	0.002629		-0.2666	0.630127	2.7208	1.34741	1.75635
6.63043	-0.125	0.376493	0.433964	2.07262	-0.40744		-0.23874	-0.71333	-0.9699	-0.35155	1.47047		-1.12359	-0.67568	-0.36206	0.002025	-0.00226		-0.26352	0.629942	3.00639	1.44258	1.72042
6.63855	-0.11991	0.328961	0.434759	2.08858	-0.35407		-0.21874	-0.75557	-0.99826	-0.37666	1.49435		-1.05439	-0.66396	-0.39065	0.04421	-0.01562		-0.23569	0.606283	3.35604	1.43094	1.63932
6.64675	-0.11679	0.276405	0.411319	2.14544	-0.29541		-0.16919	-0.79305	-1.01796	-0.43505	1.47008		-0.96027	-0.64168	-0.43648	0.043675	-0.03556		-0.20706	0.565625	3.73989	1.32295	1.54019
6.65495	-0.1584	0.215453	0.377524	2.23252	-0.23741		-0.10155	-0.80315	-0.9992	-0.49166	1.41975		-0.85127	-0.62098	-0.50672	-0.00385	-0.03829		-0.20147	0.513144	4.1066	1.14415	1.44322
6.66316	-0.24112	0.151227	0.343258	2.35233	-0.17938		-0.04364	-0.77126	-0.94822	-0.51335	1.37662		-0.74908	-0.61989	-0.57937	-0.09262	0.002066		-0.22111	0.460082	4.38316	0.961041	1.34309
6.67136	-0.32639	0.090436	0.308444	2.49218	-0.11847		-0.01758	-0.71771	-0.89606	-0.51358	1.35007		-0.66307	-0.6455	-0.62567	-0.17416	0.085579		-0.23447	0.408822	4.53812	0.836114	1.23022
6.67956	-0.3681	0.042766	0.27524	2.58319	-0.04738		-0.02336	-0.66883	-0.86913	-0.51326	1.3316		-0.59558	-0.69669	-0.63887	-0.19462	0.187538		-0.22178	0.355246	4.58108	0.78069	1.10543
6.68777	-0.35919	0.017837	0.240908	2.54708	0.024488		-0.0436	-0.63876	-0.87204	-0.51372	1.30463		-0.54524	-0.77377	-0.63355	-0.14408	0.267096		-0.20401	0.304145	4.55311	0.741081	0.992872
6.69597	-0.32715	0.025065	0.218417	2.37312	0.07405		-0.06624	-0.61501	-0.88675	-0.49519	1.27201		-0.51212	-0.86505	-0.63325	-0.05556	0.294189		-0.22638	0.260437	4.48367	0.634793	0.913557
6.70417	-0.30501	0.048594	0.212779	2.15145	0.071863		-0.09274	-0.58025	-0.89261	-0.43165	1.24259		-0.49947	-0.95237	-0.65087	0.02332	0.263498		-0.30237	0.231384	4.37792	0.442315	0.878707
6.71238	-0.30962	0.063151	0.214965	1.97339	0.017411		-0.11666	-0.54296	-0.87275	-0.33815	1.22749		-0.50638	-1.01027	-0.684	0.070772	0.193833		-0.38326	0.212465	4.23435	0.219427	0.885571
6.72058	-0.3389	0.06275	0.219091	1.87835	-0.04103		-0.13091	-0.5221	-0.82277	-0.24649	1.24767		-0.54318	-1.0193	-0.72821	0.088321	0.126878		-0.41471	0.197737	4.06259	0.053856	0.909877
6.7287	-0.38481	0.065974	0.223052	1.85908	-0.05477		-0.13214	-0.5393	-0.75519	-0.20182	1.3062		-0.60899	-0.97242	-0.77561	0.099961	0.101647		-0.38577	0.181993	3.88793	-0.00694	0.916304
6.7369	-0.42627	0.097934	0.235259	1.88442	-0.01107		-0.12945	-0.60025	-0.69924	-0.23821	1.37986		-0.68022	-0.89487	-0.82348	0.126332	0.136433		-0.34251	0.161311	3.73535	0.003681	0.866682
6.74511	-0.44501	0.146523	0.260354	1.90849	0.069928		-0.13658	-0.69065	-0.68338	-0.35279	1.43069		-0.73212	-0.82822	-0.86818	0.16753	0.208642		-0.33514	0.137394	3.61609	0.010698	0.755882
6.75331	-0.43333	0.186914	0.303271	1.86184	0.162201		-0.13916	-0.78765	-0.71708	-0.5159	1.44812		-0.76094	-0.79577	-0.90725	0.199466	0.267732		-0.36925	0.109233	3.52943	-0.04169	0.613813
6.76151	-0.38692	0.209487	0.360254	1.70808	0.25181		-0.12387	-0.86281	-0.78978	-0.67124	1.4561		-0.78072	-0.79479	-0.93613	0.175568	0.279592		-0.41057	0.085019	3.46126	-0.12833	0.482135
6.76972	-0.3097	0.229143	0.417943	1.4788	0.311171		-0.09571	-0.90618	-0.87013	-0.79334	1.4828		-0.79463	-0.807	-0.94619	0.091222	0.242242		-0.43451	0.072912	3.40132	-0.17954	0.385576
6.77792	-0.21855	0.266012	0.46273	1.25625	0.321064		-0.07866	-0.92804	-0.93301	-0.89101	1.52898		-0.80322	-0.82199	-0.93705	-0.00329	0.193674		-0.4595	0.063921	3.35426	-0.15886	0.316728
6.78612	-0.14643	0.312748	0.478953	1.11807	0.286033		-0.0882	-0.94872	-0.96979	-0.98709	1.57069		-0.79905	-0.84388	-0.92122	-0.05802	0.165017		-0.5079	0.052606	3.33715	-0.10369	0.254481
6.79433	-0.11366	0.352673	0.467727	1.05944	0.236491		-0.11526	-0.97314	-0.99036	-1.08	1.58889		-0.78099	-0.86407	-0.92166	-0.03741	0.16124		-0.5714	0.039384	3.3455	-0.0699	0.182735
6.80253	-0.11688	0.372007	0.447268	1.03724	0.204395		-0.14708	-0.99581	-1.01408	-1.14486	1.57058		-0.74986	-0.87773	-0.9515	0.073387	0.172252		-0.60048	0.020893	3.35304	-0.07467	0.106563
6.81073	-0.1336	0.375625	0.437318	0.993045	0.19052		-0.16899	-1.01812	-1.0441	-1.16287	1.52218		-0.69876	-0.87429	-1.00014	0.304179	0.181694		-0.56479	-0.01327	3.32849	-0.10531	0.040368
6.81885	-0.15382	0.386799	0.437126	0.902208	0.180184		-0.17326	-1.04008	-1.07683	-1.1189	1.45881		-0.64041	-0.84208	-1.04039	0.665793	0.190069		-0.50546	-0.07466	3.26545	-0.13637	-0.00174
6.82706	-0.18112	0.413624	0.435712	0.788304	0.162817		-0.15699	-1.05364	-1.10869	-1.0221	1.39927		-0.6032	-0.76731	-1.05215	1.11846	0.204143		-0.48543	-0.15213	3.19188	-0.16891	-0.02233
6.83526	-0.201	0.450791	0.440808	0.708952	0.142164		-0.12236	-1.03679	-1.14059	-0.90151	1.36385		-0.61102	-0.64452	-1.04422	1.59809	0.220608		-0.53263	-0.22523	3.13389	-0.21044	-0.04477
6.84346	-0.18665	0.490781	0.470576	0.708251	0.119464		-0.08773	-0.98595	-1.1699	-0.81007	1.35819		-0.65833	-0.50707	-1.03569	2.0493	0.221536		-0.61171	-0.27633	3.09851	-0.24602	-0.0826
6.85167	-0.11085	0.53444	0.536056	0.765642	0.08477		-0.06125	-0.92313	-1.18304	-0.79356	1.38174		-0.71907	-0.41037	-1.03285	2.46274	0.189036		-0.66909	-0.30105	3.06946	-0.27159	-0.13538
6.85987	0.009156	0.578471	0.617772	0.826411	0.03872		-0.03417	-0.87622	-1.17303	-0.84012	1.4096		-0.77535	-0.39017	-1.0204	2.83186	0.126255		-0.68112	-0.30017	3.02181	-0.29177	-0.18071
6.86807	0.112973	0.602371	0.679466	0.855434	0.000701		0.003818	-0.86417	-1.14341	-0.89327	1.40735		-0.80383	-0.41997	-0.97655	3.10959	0.057889		-0.64856	-0.27493	2.94182	-0.32587	-0.19694
6.87628	0.155469	0.574693	0.693153	0.84176	-0.00218		0.038813	-0.87644	-1.10469	-0.88716	1.35103		-0.78571	-0.44341	-0.90145	3.27002	0.028331		-0.58356	-0.23541	2.82441	-0.36442	-0.18419
6.88448	0.136595	0.485749	0.65378	0.77714	0.041516		0.046191	-0.90007	-1.06624	-0.84365	1.23709		-0.71811	-0.43894	-0.81194	3.31136	0.06647		-0.49736	-0.20106	2.68231	-0.37672	-0.15593
6.89268	0.102152	0.376303	0.588974	0.652167	0.133696		0.016269	-0.91981	-1.03598	-0.84419	1.09622		-0.63287	-0.42592	-0.7389	3.263	0.167568		-0.42746	-0.18582	2.54846	-0.33611	-0.13394
6.90089	0.091546	0.297075	0.536325	0.499598	0.256839		-0.04344	-0.92516	-1.02214	-0.94574	0.963367		-0.59074	-0.42679	-0.69541	3.15993	0.295759		-0.41105	-0.18092	2.45243	-0.23532	-0.12413
6.90909	0.10714	0.270256	0.523115	0.390177	0.379345		-0.11901	-0.91362	-1.02332	-1.12407	0.872068		-0.62742	-0.43734	-0.67094	3.0322	0.412568		-0.434	-0.18176	2.40492	-0.11404	-0.11349
6.91721	0.123287	0.270577	0.538171	0.39158	0.481504		-0.21279	-0.88277	-1.02851	-1.26233	0.83444		-0.7212	-0.44719	-0.65048	2.89263	0.504588		-0.44455	-0.19576	2.38623	-0.01878	-0.08424
6.92541	0.116441	0.25726	0.537974	0.509371	0.548141		-0.32167	-0.84502	-1.02407	-1.26699	0.840151		-0.81145	-0.44614	-0.62046	2.73513	0.562565		-0.40441	-0.23478	2.36696	0.022332	-0.02515
6.93362	0.096969	0.211858	0.498963	0.67383	0.581224		-0.42503	-0.81743	-1.00803	-1.12183	0.86808		-0.84573	-0.42592	-0.57687	2.5484	0.587889		-0.32953	-0.30477	2.32267	-0.00419	0.050504
6.94182	0.082615	0.139492	0.437548	0.799552	0.59158		-0.49498	-0.8179	-0.99418	-0.88637	0.884432		-0.8262	-0.36743	-0.51724	2.33444	0.587737		-0.27658	-0.38327	2.25622	-0.09136	0.118908
6.95002	0.072983	0.065135	0.391622	0.831773	0.58459		-0.51332	-0.85218	-0.9894	-0.64621	0.859294		-0.80309	-0.25142	-0.45235	2.11453	0.593926		-0.29956	-0.44609	2.1899	-0.23632	0.156866
6.95822	0.048373	-0.00401	0.38074	0.786152	0.55588		-0.48807	-0.88868	-0.98919	-0.46718	0.780273		-0.8224	-0.09896	-0.404	1.89855	0.651962		-0.40224	-0.47238	2.13959	-0.42907	0.158721
6.96643	0.000427	-0.07755	0.398137	0.69975	0.499546		-0.43104	-0.88665	-0.98439	-0.38742	0.666022		-0.88549	0.046041	-0.39645	1.68763	0.788403		-0.53808	-0.46126	2.10591	-0.63873	0.134018
6.97463	-0.04254	-0.16623	0.440561	0.608127	0.437256		-0.37201	-0.84066	-0.97833	-0.39445	0.555018		-0.96446	0.146144	-0.45135	1.49257	1.0034		-0.65229	-0.42038	2.07033	-0.80059	0.09834
6.98283	-0.04539	-0.27502	0.512847	0.528122	0.399276		-0.34517	-0.79511	-0.96515	-0.44423	0.479052		-1.0312	0.192844	-0.56498	1.35637	1.24973		-0.70874	-0.35269	2.02217	-0.86521	0.062558
6.99104	-0.00192	-0.37678	0.613717	0.458697	0.404093		-0.35819	-0.79224	-0.938	-0.47761	0.444286		-1.09101	0.197089	-0.70742	1.32061	1.46595		-0.71022	-0.26818	1.96186	-0.81425	0.020687
6.99924	0.049705	-0.44762	0.720603	0.413528	0.446327		-0.39136	-0.83192	-0.91241	-0.45779	0.429305		-1.15688	0.16092	-0.83487	1.35548	1.61097		-0.67796	-0.1727	1.90121	-0.67769	-0.04239
7.00736	0.064396	-0.47427	0.81394	0.379916	0.488945		-0.41594	-0.88656	-0.91529	-0.38804	0.418365		-1.22088	0.091516	-0.91194	1.39198	1.68243		-0.63566	-0.074	1.84603	-0.52065	-0.13644
7.01557	0.020295	-0.46062	0.879108	0.340181	0.499255		-0.42429	-0.92528	-0.96047	-0.29971	0.411779		-1.26205	-0.00479	-0.92502	1.35834	1.71316		-0.60348	0.027851	1.79271	-0.38764	-0.24304
7.02377	-0.07128	-0.43464	0.912032	0.291421	0.472015		-0.43271	-0.94603	-1.02148	-0.23742	0.41706		-1.26047	-0.11714	-0.89246	1.2343	1.72994		-0.58655	0.133083	1.74332	-0.30701	-0.32532
7.03197	-0.17384	-0.42882	0.912838	0.247536	0.432505		-0.45103	-0.9568	-1.05901	-0.23281	0.432114		-1.22739	-0.22292	-0.85267	1.04083	1.73987		-0.59642	0.230005	1.69027	-0.29136	-0.36524
7.04017	-0.2559	-0.46605	0.885031	0.237477	0.40196		-0.46051	-0.96639	-1.06416	-0.29972	0.438051		-1.17702	-0.30207	-0.83962	0.803654	1.73752		-0.63035	0.302778	1.63332	-0.32483	-0.38032
7.04838	-0.29224	-0.52848	0.851455	0.258308	0.375158		-0.43858	-0.9798	-1.059	-0.39458	0.423295		-1.11274	-0.34008	-0.87391	0.583028	1.73049		-0.67182	0.333712	1.57296	-0.36153	-0.41114
7.05658	-0.28652	-0.57536	0.827265	0.271839	0.332679		-0.4023	-1.00496	-1.06622	-0.43348	0.380174		-1.03909	-0.34511	-0.95077	0.418451	1.73477		-0.70289	0.320377	1.50836	-0.33855	-0.46819
7.06478	-0.26995	-0.5719	0.81411	0.235575	0.267023		-0.38389	-1.03575	-1.07937	-0.35289	0.320646		-0.9687	-0.33115	-1.04715	0.318981	1.74597		-0.71101	0.270801	1.44684	-0.24051	-0.53387
7.07299	-0.27484	-0.51756	0.809535	0.152882	0.195741		-0.38795	-1.04277	-1.08885	-0.14175	0.272343		-0.93376	-0.31203	-1.12957	0.278616	1.73401		-0.69636	0.207659	1.39172	-0.09118	-0.58875
7.08119	-0.30933	-0.4293	0.814745	0.062104	0.140587		-0.39112	-1.0105	-1.09227	0.121576	0.256037		-0.95573	-0.30542	-1.16517	0.300778	1.65795		-0.65619	0.161733	1.3461	0.049274	-0.62657
7.08939	-0.34465	-0.30332	0.832563	-0.00992	0.109631		-0.37574	-0.94213	-1.08518	0.338136	0.276823		-1.02539	-0.32203	-1.15266	0.409403	1.50231		-0.60495	0.175708	1.30073	0.132984	-0.65871
7.09751	-0.35393	-0.10436	0.850836	-0.05436	0.091516		-0.34987	-0.8535	-1.05343	0.451029	0.300789		-1.10635	-0.36239	-1.11887	0.592148	1.29356		-0.5634	0.28578	1.24923	0.174488	-0.68935
7.10572	-0.33514	0.210392	0.860655	-0.08228	0.078608		-0.33141	-0.76641	-0.98686	0.465047	0.28975		-1.16469	-0.41232	-1.09815	0.774964	1.08578		-0.5409	0.481305	1.18612	0.214408	-0.72494
7.11392	-0.30939	0.641384	0.855022	-0.0992	0.076236		-0.33066	-0.69604	-0.90012	0.428724	0.235616		-1.19544	-0.45457	-1.09762	0.849738	0.946994		-0.53033	0.711535	1.10131	0.289757	-0.764
7.12212	-0.30156	1.14875	0.832826	-0.10237	0.090959		-0.32897	-0.65926	-0.81491	0.380035	0.163208		-1.20458	-0.48045	-1.09953	0.780433	0.902236		-0.50959	0.915662	1.00358	0.403142	-0.80026
7.13033	-0.30654	1.67625	0.799689	-0.10151	0.13571		-0.31192	-0.65506	-0.74147	0.36975	0.103813		-1.18709	-0.50135	-1.0933	0.623013	0.92171		-0.46834	1.07142	0.912422	0.525496	-0.82827
7.13853	-0.30493	2.17321	0.756579	-0.1286	0.212624		-0.28222	-0.67272	-0.66895	0.424586	0.066397		-1.12163	-0.52817	-1.0813	0.479493	0.94331		-0.41447	1.19495	0.852667	0.617716	-0.83601
7.14673	-0.28314	2.61016	0.722116	-0.20461	0.311754		-0.24541	-0.69139	-0.58543	0.523425	0.050839		-1.00339	-0.55501	-1.06525	0.431851	0.940885		-0.36845	1.29825	0.83598	0.664216	-0.82145
7.15494	-0.25394	2.94785	0.71719	-0.29442	0.409102		-0.20884	-0.68291	-0.48385	0.601624	0.048725		-0.8657	-0.57718	-1.03013	0.488255	0.925414		-0.3481	1.37129	0.853394	0.692869	-0.79175
7.16314	-0.23826	3.16022	0.738356	-0.35739	0.470538		-0.18109	-0.61944	-0.3663	0.589687	0.049169		-0.75988	-0.58984	-0.9558	0.590531	0.90808		-0.36941	1.38651	0.867107	0.729907	-0.74792
7.17134	-0.24056	3.23387	0.752081	-0.35224	0.489157		-0.18196	-0.47478	-0.2503	0.505424	0.035175		-0.71761	-0.59354	-0.83909	0.647161	0.881066		-0.43506	1.33593	0.836447	0.767219	-0.68104
7.17955	-0.25028	3.19803	0.73675	-0.25749	0.471008		-0.21677	-0.25041	-0.15154	0.444406	-0.00141		-0.72267	-0.57454	-0.69532	0.610363	0.823169		-0.51105	1.24061	0.748094	0.775408	-0.59194
7.18767	-0.25725	3.11778	0.706056	-0.07988	0.431438		-0.27234	0.023533	-0.08559	0.495318	-0.04564		-0.73894	-0.5047	-0.55501	0.50351	0.741147		-0.55359	1.12706	0.62285	0.73357	-0.50624
7.19587	-0.26274	3.0416	0.68323	0.156913	0.388509		-0.32656	0.27906	-0.04863	0.645414	-0.07843		-0.74182	-0.36971	-0.44482	0.396538	0.653678		-0.53975	1.01721	0.508796	0.648448	-0.4556
7.20407	-0.27259	2.98525	0.667489	0.383495	0.363324		-0.36345	0.470783	-0.01969	0.801419	-0.09789		-0.73314	-0.17346	-0.37203	0.346768	0.567415		-0.49938	0.921293	0.433867	0.544113	-0.4584
7.21228	-0.29741	2.93107	0.630083	0.543638	0.379948		-0.38991	0.59817	0.009164	0.890829	-0.12399		-0.72693	0.040994	-0.31646	0.326626	0.480589		-0.46864	0.847926	0.400268	0.441638	-0.49259
7.22048	-0.33399	2.85964	0.550877	0.62356	0.438859		-0.41304	0.685859	0.032297	0.90266	-0.15973		-0.72619	0.221996	-0.24371	0.296034	0.402987		-0.4531	0.802686	0.38697	0.346501	-0.50856
7.22868	-0.36698	2.76515	0.436655	0.646424	0.514196		-0.43504	0.746993	0.034785	0.884932	-0.19162		-0.73369	0.335657	-0.14574	0.249106	0.364305		-0.44914	0.77238	0.376415	0.275114	-0.46191
7.23689	-0.39136	2.64075	0.314054	0.64067	0.571205		-0.45992	0.764804	0.013657	0.875159	-0.20809		-0.73612	0.383765	-0.04853	0.200821	0.372534		-0.46179	0.737901	0.368851	0.230532	-0.34756
7.24509	-0.40874	2.48427	0.209825	0.605036	0.597371		-0.49263	0.723589	-0.01938	0.875551	-0.21184		-0.71611	0.405587	0.008759	0.157008	0.40082		-0.50666	0.691625	0.361414	0.201017	-0.21238
7.25329	-0.43257	2.30567	0.135858	0.537812	0.598829		-0.54003	0.620299	-0.05048	0.838693	-0.23067		-0.65863	0.439727	0.018232	0.096644	0.411017		-0.56258	0.645217	0.350426	0.179358	-0.11729
7.26149	-0.47382	2.13815	0.096457	0.440482	0.570914		-0.59689	0.477748	-0.07305	0.711734	-0.27421		-0.5627	0.51148	-0.00684	0.02974	0.384673		-0.57188	0.618832	0.335483	0.150222	-0.10352
7.2697	-0.5323	2.02101	0.08031	0.327138	0.505536		-0.64267	0.341295	-0.09861	0.496269	-0.31526		-0.46147	0.616039	-0.05599	-0.00574	0.336264		-0.4997	0.617267	0.323595	0.107649	-0.16299
7.27782	-0.59136	1.95454	0.065637	0.216742	0.419452		-0.64623	0.244737	-0.13795	0.244683	-0.31185		-0.38581	0.72256	-0.12595	0.013725	0.285476		-0.37412	0.626965	0.33098	0.033943	-0.25065
7.28602	-0.62116	1.90155	0.037239	0.127034	0.367697		-0.59992	0.200567	-0.19101	0.048645	-0.24159		-0.33441	0.800403	-0.20252	0.07334	0.233217		-0.26036	0.625941	0.354699	-0.08527	-0.32163
7.29423	-0.61588	1.8319	-0.00436	0.091769	0.392915		-0.52921	0.175471	-0.23927	-0.05038	-0.13205		-0.27482	0.826587	-0.24297	0.149993	0.155674		-0.20288	0.605266	0.376773	-0.23083	-0.34943
7.30243	-0.58312	1.75504	-0.03365	0.107095	0.48868		-0.46972	0.1281	-0.25486	-0.07798	-0.03397		-0.18715	0.784365	-0.2223	0.264978	0.044326		-0.19605	0.564311	0.373707	-0.36394	-0.34205
7.31063	-0.53872	1.68217	-0.03464	0.122967	0.603984		-0.44018	0.049914	-0.22576	-0.07072	0.005465		-0.08851	0.673665	-0.15421	0.437843	-0.07776		-0.21703	0.516385	0.336147	-0.42672	-0.31813
7.31883	-0.49495	1.60406	-0.01078	0.073375	0.687881		-0.4228	-0.03363	-0.16074	-0.0405	-0.02541		0.000271	0.537642	-0.08214	0.645081	-0.16654		-0.25336	0.471483	0.27981	-0.39914	-0.29811
7.32704	-0.44169	1.49917	0.022007	-0.04414	0.724337		-0.39188	-0.08703	-0.07851	0.038384	-0.11295		0.074542	0.43487	-0.04323	0.808481	-0.18402		-0.30914	0.434977	0.237094	-0.30931	-0.30172
7.33524	-0.35869	1.37308	0.044614	-0.16385	0.713841		-0.33942	-0.11964	0.007647	0.152513	-0.24243		0.15052	0.394865	-0.041	0.876871	-0.13554		-0.37571	0.415199	0.241211	-0.22495	-0.3291
7.34344	-0.23031	1.26824	0.049228	-0.22908	0.662875		-0.28275	-0.16907	0.090277	0.253659	-0.39375		0.236501	0.395996	-0.07315	0.857823	-0.05787		-0.42707	0.416817	0.294413	-0.21082	-0.36995
7.35165	-0.05861	1.20648	0.036648	-0.25497	0.5808		-0.2371	-0.25072	0.172507	0.304214	-0.54372		0.317006	0.392261	-0.13136	0.781813	-0.00269		-0.43392	0.451428	0.364065	-0.28731	-0.41017
7.35985	0.120234	1.17012	0.025174	-0.31321	0.488322		-0.19697	-0.32909	0.26923	0.309981	-0.65504		0.366628	0.369024	-0.1969	0.679466	-0.00238		-0.40007	0.511685	0.406804	-0.42625	-0.44353
7.36797	0.250478	1.11622	0.040357	-0.42889	0.416722		-0.16271	-0.34795	0.398421	0.323167	-0.70236		0.37424	0.338056	-0.24503	0.563184	-0.05571		-0.36593	0.579672	0.401059	-0.56126	-0.46955
7.37618	0.294592	1.03581	0.096096	-0.57167	0.380246		-0.13962	-0.30239	0.57018	0.370131	-0.68702		0.350748	0.308197	-0.26675	0.458186	-0.13934		-0.36051	0.633969	0.358683	-0.63207	-0.49002
7.38438	0.27071	0.968065	0.173844	-0.66769	0.380697		-0.13505	-0.23917	0.767614	0.429734	-0.63898		0.310291	0.260461	-0.28066	0.387074	-0.21403		-0.37936	0.659199	0.298166	-0.59646	-0.49956
7.39258	0.229876	0.948679	0.227452	-0.66785	0.400482		-0.15526	-0.21932	0.946079	0.468423	-0.59447		0.27551	0.182771	-0.30671	0.35861	-0.25829		-0.38285	0.663959	0.232931	-0.46697	-0.49676
7.40078	0.204097	0.981142	0.225841	-0.61274	0.418491		-0.19274	-0.26168	1.07595	0.476556	-0.57201		0.249731	0.096891	-0.35211	0.372723	-0.26701		-0.35328	0.657951	0.169411	-0.32536	-0.49779
7.40899	0.179209	1.0151	0.175187	-0.57924	0.424832		-0.23617	-0.34006	1.16117	0.476473	-0.5805		0.212807	0.024934	-0.40164	0.415348	-0.24795		-0.31129	0.651825	0.128941	-0.27104	-0.52032
7.41719	0.134198	0.999026	0.112106	-0.62499	0.414907		-0.26789	-0.41682	1.23728	0.492191	-0.61886		0.148	-0.02163	-0.44022	0.484082	-0.22404		-0.29356	0.645389	0.133428	-0.34769	-0.56794
7.42539	0.080316	0.924224	0.069084	-0.72563	0.396579		-0.27799	-0.47066	1.32492	0.509264	-0.68844		0.055245	-0.05031	-0.45769	0.564682	-0.21874		-0.3057	0.637547	0.170133	-0.49513	-0.62538
7.4336	0.049471	0.815158	0.049885	-0.7955	0.372832		-0.26104	-0.50251	1.42283	0.45802	-0.78732		-0.04273	-0.07493	-0.45109	0.637103	-0.25652		-0.30862	0.636299	0.206619	-0.6211	-0.6721
7.4418	0.059915	0.693204	0.04016	-0.77205	0.3477		-0.22528	-0.51903	1.504	0.305962	-0.90325		-0.13192	-0.10118	-0.43218	0.6866	-0.33502		-0.27905	0.644815	0.207832	-0.66048	-0.69754
7.45	0.090376	0.570098	0.025782	-0.66196	0.338523		-0.20021	-0.53799	1.54119	0.107796	-1.01946		-0.19922	-0.13078	-0.42327	0.692544	-0.42118		-0.22523	0.655852	0.176762	-0.63604	-0.70181
7.45821	0.106068	0.459733	0.004726	-0.53395	0.368267		-0.21838	-0.57212	1.52835	-0.04275	-1.10639		-0.23124	-0.155	-0.44273	0.648802	-0.47255		-0.1849	0.64529	0.147332	-0.62989	-0.70522
7.46633	0.087142	0.378637	-0.02917	-0.4527	0.432982		-0.29591	-0.62504	1.47627	-0.11317	-1.14999		-0.22069	-0.17351	-0.47485	0.544113	-0.47287		-0.19314	0.602229	0.157061	-0.68091	-0.72098
7.47453	0.036682	0.334446	-0.08306	-0.45462	0.496505		-0.4073	-0.68102	1.4178	-0.15102	-1.15331		-0.17435	-0.19365	-0.48469	0.395801	-0.43666		-0.2432	0.544401	0.218733	-0.77788	-0.74589
7.48273	-0.0214	0.316293	-0.15657	-0.55645	0.529899		-0.49532	-0.71186	1.37673	-0.18684	-1.1345		-0.13905	-0.22284	-0.44879	0.246799	-0.39709		-0.30001	0.506529	0.3042	-0.8724	-0.75987
7.49094	-0.0625	0.300408	-0.23442	-0.72584	0.530429		-0.50636	-0.70753	1.36337	-0.20066	-1.11849		-0.1649	-0.2594	-0.36118	0.132289	-0.38116		-0.32682	0.503387	0.375705	-0.91964	-0.74404
7.49914	-0.05991	0.27941	-0.27838	-0.87982	0.525208		-0.43372	-0.67153	1.37772	-0.15166	-1.11105		-0.25645	-0.28559	-0.23268	0.055493	-0.38662		-0.32591	0.514458	0.405343	-0.89364	-0.71241
7.50734	-0.02171	0.259674	-0.27158	-0.92572	0.53465		-0.32388	-0.62397	1.42324	-0.05807	-1.12112		-0.36561	-0.29855	-0.07491	-0.00065	-0.39375		-0.32636	0.516015	0.392513	-0.77754	-0.68782
7.51555	0.012423	0.250105	-0.22585	-0.83936	0.55368		-0.23295	-0.59369	1.50119	0.000991	-1.15803		-0.4371	-0.31283	0.093071	-0.05012	-0.38171		-0.34824	0.510054	0.358083	-0.59986	-0.67762
7.52375	0.005558	0.245707	-0.1688	-0.67015	0.577381		-0.19057	-0.59396	1.58854	-0.01156	-1.22067		-0.46108	-0.33579	0.242722	-0.07792	-0.34067		-0.37619	0.525785	0.321066	-0.43088	-0.66923
7.53195	-0.05171	0.24489	-0.12615	-0.49413	0.600359		-0.17909	-0.62081	1.6472	-0.06361	-1.28147		-0.46176	-0.34611	0.349767	-0.04033	-0.27476		-0.36264	0.570695	0.292502	-0.35599	-0.65533
7.54016	-0.13147	0.253985	-0.10845	-0.34848	0.617216		-0.16877	-0.65724	1.65083	-0.08014	-1.30083		-0.46795	-0.32202	0.40212	0.084362	-0.19286		-0.29043	0.609055	0.270866	-0.41096	-0.64925
7.54836	-0.18687	0.25529	-0.12166	-0.23548	0.607555		-0.14577	-0.69969	1.60863	-0.0186	-1.26415		-0.49297	-0.25877	0.417302	0.248701	-0.11936		-0.19518	0.61025	0.25944	-0.52834	-0.6585
7.55648	-0.18409	0.222776	-0.15833	-0.1665	0.566137		-0.12052	-0.73845	1.54465	0.105109	-1.19956		-0.54159	-0.16503	0.426847	0.377836	-0.07314		-0.13317	0.573969	0.264446	-0.6183	-0.67652
7.56468	-0.12473	0.149703	-0.20534	-0.15393	0.520709		-0.11675	-0.75372	1.47825	0.235634	-1.15516		-0.61423	-0.0613	0.4621	0.442801	-0.0554		-0.12978	0.524703	0.288627	-0.64609	-0.68698
7.57289	-0.04614	0.071262	-0.2422	-0.20344	0.504184		-0.13424	-0.74019	1.4174	0.304119	-1.15558		-0.69539	0.045698	0.542511	0.492286	-0.05351		-0.16961	0.467284	0.313467	-0.64219	-0.67602
7.58109	0.009611	0.030601	-0.26251	-0.26944	0.532417		-0.16707	-0.71603	1.36501	0.292943	-1.18571		-0.75827	0.13629	0.657879	0.570128	-0.04945		-0.22062	0.389375	0.308802	-0.64466	-0.64681
7.58929	0.025381	0.040586	-0.28349	-0.2965	0.575419		-0.20969	-0.72009	1.31851	0.240913	-1.20866		-0.77915	0.186309	0.781547	0.67597	-0.04373		-0.25324	0.295193	0.257494	-0.66678	-0.61299
7.5975	0.019743	0.087789	-0.31887	-0.27975	0.596245		-0.25575	-0.76894	1.25738	0.202308	-1.197		-0.76746	0.189569	0.867838	0.770553	-0.04305		-0.26475	0.218083	0.165964	-0.67537	-0.59139
7.6057	0.015223	0.149674	-0.36318	-0.24079	0.585928		-0.29748	-0.83535	1.15915	0.200643	-1.15593		-0.74934	0.155268	0.884522	0.807732	-0.06248		-0.26244	0.198272	0.068002	-0.62869	-0.58062
7.6139	0.019432	0.232469	-0.39243	-0.21354	0.565706		-0.31343	-0.87436	1.03053	0.226931	-1.10673		-0.7463	0.112339	0.828481	0.787472	-0.1155		-0.26683	0.232645	-0.00656	-0.53085	-0.56173
7.6221	0.015535	0.349762	-0.38811	-0.19815	0.566733		-0.29191	-0.87551	0.901112	0.277379	-1.0686		-0.76655	0.082297	0.728367	0.714754	-0.1924		-0.29967	0.27698	-0.05034	-0.42225	-0.5114
7.63031	-0.01832	0.485165	-0.34361	-0.16937	0.586816		-0.24262	-0.87292	0.799119	0.365482	-1.03678		-0.80124	0.078446	0.617684	0.593467	-0.27045		-0.36002	0.293754	-0.07601	-0.3696	-0.43383
7.63851	-0.07593	0.612677	-0.26339	-0.10246	0.602195		-0.20324	-0.8984	0.727765	0.500121	-0.99235		-0.84542	0.092391	0.505724	0.435108	-0.31983		-0.42157	0.272649	-0.10436	-0.39564	-0.3587
7.64663	-0.13415	0.697179	-0.15642	-0.00863	0.601426		-0.20633	-0.95038	0.68117	0.638101	-0.935		-0.87985	0.092398	0.38091	0.273218	-0.33339		-0.44855	0.242032	-0.13982	-0.45367	-0.31181
7.65484	-0.16779	0.69432	-0.03763	0.059607	0.610179		-0.25672	-0.99239	0.65435	0.7241	-0.89112		-0.88347	0.067119	0.23418	0.145332	-0.3247		-0.44174	0.235708	-0.17498	-0.4704	-0.29986
7.66304	-0.17101	0.5688	0.067298	0.081936	0.669819		-0.33103	-0.99989	0.641326	0.752873	-0.9041		-0.85906	0.026852	0.088672	0.060856	-0.31304		-0.43081	0.26212	-0.19128	-0.41898	-0.30798
7.67124	-0.1474	0.333206	0.146624	0.092982	0.788953		-0.39098	-0.98446	0.632335	0.773418	-0.98626		-0.83337	-0.00612	-0.02156	0.04352	-0.30421		-0.43683	0.300494	-0.17751	-0.34305	-0.32943
7.67945	-0.11245	0.050176	0.206905	0.182678	0.923737		-0.41547	-0.97275	0.610249	0.823379	-1.11018		-0.84281	-0.03487	-0.08001	0.107487	-0.29302		-0.44907	0.313736	-0.15997	-0.27138	-0.36485
7.68765	-0.0842	-0.19822	0.267652	0.431648	1.01077		-0.41239	-0.98617	0.565189	0.870771	-1.22527		-0.8962	-0.07543	-0.08954	0.229	-0.2862		-0.41783	0.271316	-0.18172	-0.21465	-0.40817
7.69585	-0.06116	-0.35319	0.33808	0.832641	1.02676		-0.39898	-1.0109	0.499944	0.877977	-1.28347		-0.97508	-0.1229	-0.07104	0.359716	-0.29726		-0.31401	0.169721	-0.26556	-0.15589	-0.45692
7.70405	-0.04562	-0.40894	0.402761	1.31082	0.987028		-0.37263	-1.03033	0.425291	0.837552	-1.27347		-1.04284	-0.15894	-0.03196	0.450339	-0.33978		-0.15747	0.047833	-0.38137	-0.06029	-0.51507
7.71226	-0.03724	-0.39331	0.444019	1.8001	0.920331		-0.32625	-1.03923	0.363092	0.781765	-1.21154		-1.07216	-0.17006	0.026632	0.487268	-0.41741		0.005056	-0.05185	-0.46058	0.066765	-0.59575
7.72046	-0.03493	-0.35506	0.455344	2.29025	0.843855		-0.28336	-1.04256	0.330475	0.753432	-1.11842		-1.06994	-0.1706	0.103471	0.480468	-0.52065		0.146616	-0.10778	-0.45622	0.195011	-0.69356
7.72866	-0.0388	-0.33926	0.456171	2.79068	0.768333		-0.27848	-1.04483	0.323221	0.745454	-1.00252		-1.05522	-0.18865	0.187487	0.435144	-0.62161		0.277307	-0.12022	-0.38975	0.305479	-0.78004
7.73678	-0.04115	-0.37488	0.470795	3.3016	0.723045		-0.32569	-1.04686	0.31138	0.730092	-0.85979		-1.05663	-0.24578	0.254546	0.341964	-0.68551		0.413793	-0.09423	-0.33712	0.415958	-0.82276
7.74499	-0.03873	-0.45509	0.500672	3.80105	0.726636		-0.39214	-1.07075	0.272353	0.685946	-0.70321		-1.09805	-0.33567	0.284259	0.214697	-0.70744		0.573844	-0.03325	-0.3496	0.553507	-0.80314
7.75319	-0.03107	-0.53538	0.534078	4.22989	0.77268		-0.42261	-1.13632	0.211672	0.619982	-0.56754		-1.18524	-0.43312	0.259992	0.088939	-0.70677		0.74572	0.044249	-0.41287	0.710739	-0.73753
7.76139	-0.02853	-0.57805	0.557556	4.56207	0.820168		-0.40493	-1.22379	0.155363	0.555194	-0.4883		-1.2865	-0.49917	0.195207	-0.01609	-0.71105		0.903181	0.114038	-0.47619	0.826318	-0.66446
7.7696	-0.03653	-0.55811	0.569983	4.7955	0.821426		-0.37324	-1.27514	0.121097	0.503427	-0.46427		-1.35221	-0.50698	0.12136	-0.08993	-0.71961		1.01145	0.143381	-0.502	0.826398	-0.62348
7.7778	-0.0487	-0.47567	0.579029	4.95688	0.766511		-0.37303	-1.23002	0.095833	0.460659	-0.46956		-1.35099	-0.48103	0.074157	-0.11952	-0.70305		1.04742	0.129235	-0.49788	0.699197	-0.63125
7.786	-0.06024	-0.35291	0.594223	5.06757	0.681162		-0.40885	-1.07426	0.064405	0.397858	-0.49184		-1.29224	-0.47069	0.065199	-0.07919	-0.6556		1.02399	0.102935	-0.49212	0.484267	-0.67176
7.79421	-0.07681	-0.23228	0.622747	5.12733	0.610855		-0.45204	-0.83637	0.02049	0.310349	-0.53998		-1.22602	-0.49667	0.072404	0.031381	-0.60225		0.980642	0.087151	-0.50023	0.236802	-0.71421
7.80241	-0.10832	-0.17004	0.660514	5.119	0.57758		-0.46943	-0.57002	-0.02594	0.239511	-0.61256		-1.18549	-0.53595	0.068218	0.163274	-0.58902		0.953899	0.0829	-0.50681	-0.00046	-0.7384
7.81061	-0.14396	-0.18356	0.705958	5.02082	0.560153		-0.44508	-0.31994	-0.06652	0.250021	-0.68242		-1.16993	-0.56012	0.045721	0.256394	-0.63679		0.940093	0.063234	-0.5016	-0.16839	-0.75436
7.81882	-0.16318	-0.24153	0.757396	4.85997	0.516171		-0.3962	-0.12412	-0.10125	0.372045	-0.72648		-1.16181	-0.58352	0.027596	0.259022	-0.72354		0.920802	0.01552	-0.48672	-0.22394	-0.77492
7.82694	-0.14654	-0.28437	0.810389	4.66936	0.417921		-0.34249	-0.00603	-0.12616	0.57958	-0.74759		-1.14993	-0.62154	0.042335	0.171299	-0.81037		0.887358	-0.05098	-0.46485	-0.19066	-0.79722
7.83514	-0.09289	-0.28096	0.85803	4.46497	0.290604		-0.29812	0.043488	-0.14753	0.823629	-0.77376		-1.14271	-0.66323	0.095767	0.018956	-0.8682		0.838176	-0.10727	-0.44037	-0.1387	-0.80315
7.84334	-0.02294	-0.25085	0.898756	4.2604	0.186366		-0.26808	0.057959	-0.16834	1.06019	-0.82281		-1.14491	-0.67638	0.163795	-0.15023	-0.88731		0.778258	-0.13314	-0.41437	-0.13592	-0.78349
7.85155	0.045405	-0.21419	0.944808	4.05648	0.148386		-0.24411	0.071379	-0.18416	1.28122	-0.88411		-1.15949	-0.6444	0.211781	-0.26956	-0.87265		0.702942	-0.14174	-0.40337	-0.18188	-0.74466
7.85975	0.097495	-0.17764	1.01055	3.86458	0.186187		-0.21484	0.08229	-0.18893	1.46979	-0.94577		-1.18538	-0.60293	0.22269	-0.30758	-0.84192		0.617811	-0.16052	-0.41798	-0.22759	-0.6936
7.86795	0.131815	-0.13781	1.10092	3.67993	0.272927		-0.16691	0.069876	-0.17622	1.62615	-0.99523		-1.2189	-0.60053	0.200725	-0.26615	-0.81015		0.534732	-0.20572	-0.45795	-0.24708	-0.64759
7.87616	0.14826	-0.10262	1.19799	3.4824	0.36551		-0.09494	0.022862	-0.15304	1.77463	-1.02494		-1.25055	-0.65048	0.181614	-0.17587	-0.77227		0.462911	-0.25617	-0.51635	-0.25012	-0.62495
7.88436	0.148033	-0.08278	1.28196	3.24852	0.420751		-0.00707	-0.04617	-0.13246	1.91773	-1.02482		-1.2568	-0.71675	0.214505	-0.07069	-0.72543		0.408535	-0.27938	-0.57647	-0.26807	-0.6447
7.89256	0.143557	-0.06509	1.34148	2.9931	0.426416		0.069021	-0.10323	-0.13288	2.02997	-0.99684		-1.23798	-0.75426	0.320268	0.029407	-0.68129		0.368956	-0.25247	-0.62875	-0.30196	-0.71041
7.90077	0.143622	-0.02525	1.36731	2.76779	0.396116		0.10879	-0.13832	-0.15889	2.05688	-0.95524		-1.21851	-0.74453	0.48177	0.113884	-0.67069		0.353868	-0.19613	-0.65949	-0.34924	-0.79014
7.90897	0.157639	0.042577	1.3602	2.59305	0.363443		0.114031	-0.15953	-0.20076	1.99375	-0.89182		-1.22286	-0.70101	0.649271	0.209382	-0.71484		0.371001	-0.15247	-0.6625	-0.42757	-0.85034
7.91709	0.187165	0.100151	1.32107	2.4622	0.342856		0.110569	-0.18216	-0.24388	1.89836	-0.79383		-1.24963	-0.65192	0.773953	0.353616	-0.7953		0.413913	-0.13449	-0.64672	-0.54577	-0.87145
7.92529	0.232448	0.115788	1.25629	2.34594	0.316426		0.137192	-0.21804	-0.27621	1.8396	-0.66644		-1.27266	-0.60887	0.826903	0.552662	-0.85799		0.456535	-0.12754	-0.63274	-0.69929	-0.85715
7.9335	0.28874	0.093106	1.16488	2.22146	0.263518		0.201753	-0.26379	-0.29295	1.8527	-0.54839		-1.27321	-0.57341	0.809255	0.738736	-0.86084		0.457887	-0.10719	-0.64632	-0.84083	-0.82028
7.9417	0.334608	0.059643	1.04315	2.08849	0.178666		0.281135	-0.31806	-0.29176	1.89332	-0.49129		-1.25065	-0.55705	0.744761	0.831048	-0.82874		0.400638	-0.07697	-0.69147	-0.91494	-0.77312
7.9499	0.352326	0.034576	0.909704	1.9878	0.086805		0.346338	-0.37408	-0.27304	1.89041	-0.51902		-1.21716	-0.57428	0.658591	0.830584	-0.81316		0.307191	-0.06424	-0.75289	-0.91696	-0.73495
7.95811	0.340551	0.014227	0.795371	1.9644	0.006995		0.399714	-0.42587	-0.24313	1.7987	-0.61952		-1.18635	-0.62711	0.576783	0.80778	-0.85063		0.223815	-0.0828	-0.79618	-0.89206	-0.71265
7.96631	0.326892	0.001339	0.725326	1.98795	-0.05601		0.47327	-0.46594	-0.21513	1.62552	-0.75233		-1.17369	-0.68783	0.509055	0.81848	-0.93033		0.177506	-0.11962	-0.78907	-0.89419	-0.6823
7.97451	0.336348	0.005482	0.685433	1.97701	-0.09846		0.585477	-0.49219	-0.19854	1.42834	-0.87201		-1.18656	-0.73107	0.443087	0.846766	-1.00702		0.161746	-0.14063	-0.72612	-0.9419	-0.58068
7.98272	0.363861	0.04766	0.637924	1.84259	-0.12197		0.730874	-0.51822	-0.18938	1.26223	-0.94453		-1.21535	-0.75383	0.36684	0.868548	-1.04829		0.153459	-0.1237	-0.63904	-1.01066	-0.35601
7.99092	0.387308	0.134241	0.561293	1.59032	-0.12392		0.871536	-0.55379	-0.18077	1.1585	-0.96546		-1.24197	-0.78046	0.278994	0.89467	-1.04876		0.140679	-0.07885	-0.5695	-1.04246	-0.02814
7.99912	0.389588	0.227823	0.461683	1.32367	-0.11513		0.973157	-0.59769	-0.16844	1.09256	-0.95814		-1.24988	-0.82292	0.193657	0.95847	-1.02289		0.127814	-0.03109	-0.5308	-1.01224	0.320897
8.00732	0.377163	0.273232	0.36415	1.14655	-0.10215		1.03895	-0.6425	-0.16635	1.01184	-0.93183		-1.25086	-0.86587	0.124954	1.0611	-0.97418		0.117539	-0.00889	-0.50801	-0.94024	0.605479
8.01544	0.359711	0.22829	0.276605	1.0869	-0.07688		1.09646	-0.69008	-0.19163	0.892042	-0.86676		-1.26298	-0.89729	0.078097	1.16572	-0.90716		0.122542	-0.01724	-0.47612	-0.85351	0.790504
8.02365	0.339719	0.103346	0.203283	1.06396	-0.02851		1.17162	-0.74298	-0.24112	0.77154	-0.73407		-1.28359	-0.90918	0.047759	1.26399	-0.84141		0.170189	-0.04228	-0.42904	-0.78307	0.891438
8.03185	0.308667	-0.05238	0.142126	0.988836	0.04954		1.25317	-0.79198	-0.29465	0.6995	-0.55381		-1.29809	-0.91789	0.024484	1.36771	-0.80082		0.270563	-0.0644	-0.38269	-0.75513	0.938096
8.04005	0.271964	-0.18772	0.094145	0.832415	0.15588		1.30814	-0.82308	-0.31792	0.67987	-0.38927		-1.2924	-0.94359	-0.00318	1.48787	-0.80946		0.389343	-0.07454	-0.345	-0.79632	0.955649
8.04826	0.252076	-0.27606	0.054674	0.625522	0.303605		1.31246	-0.8221	-0.2967	0.671737	-0.29168		-1.27166	-0.979	-0.04684	1.61226	-0.86414		0.460498	-0.086	-0.31024	-0.90179	0.977582
8.05646	0.255421	-0.31553	0.012309	0.430103	0.510459		1.27553	-0.8026	-0.24716	0.625415	-0.25459		-1.24413	-0.99374	-0.10768	1.72921	-0.93925		0.464008	-0.10494	-0.26563	-1.04055	1.06192
8.06466	0.274867	-0.29795	-0.03969	0.283407	0.772905		1.23487	-0.79658	-0.20123	0.53522	-0.21927		-1.22063	-0.95936	-0.17583	1.87021	-1.00373		0.44556	-0.12393	-0.21366	-1.16923	1.24264
8.07287	0.291436	-0.21859	-0.10108	0.195328	1.06532		1.21072	-0.83376	-0.18677	0.43644	-0.14492		-1.21147	-0.88767	-0.22629	2.0587	-1.03268		0.468325	-0.12406	-0.17027	-1.25347	1.50161
8.08107	0.295456	-0.08505	-0.15862	0.141468	1.33525		1.19949	-0.91226	-0.20852	0.377027	-0.03599		-1.21855	-0.81004	-0.24245	2.28333	-1.01934		0.552027	-0.09723	-0.14915	-1.30564	1.77614
8.08927	0.293878	0.062211	-0.19731	0.097476	1.53819		1.19168	-0.99452	-0.25789	0.3946	0.077906		-1.24471	-0.74811	-0.23224	2.47398	-0.97542		0.662245	-0.04452	-0.15535	-1.34484	2.00484
8.09748	0.288591	0.176441	-0.19883	0.065112	1.6488		1.18471	-1.04385	-0.31371	0.481193	0.1699		-1.27417	-0.69539	-0.223	2.55872	-0.92358		0.756717	0.03972	-0.17501	-1.38788	2.15741
8.1056	0.271912	0.23263	-0.1445	0.056884	1.67265		1.17676	-1.03912	-0.35408	0.607866	0.239539		-1.28967	-0.62134	-0.24717	2.5326	-0.87831		0.814844	0.169298	-0.19639	-1.4316	2.22944
8.1138	0.232786	0.238435	-0.0323	0.079998	1.63127		1.16793	-0.99306	-0.36895	0.718714	0.297555		-1.28928	-0.51455	-0.29938	2.44736	-0.84832		0.842089	0.351094	-0.21965	-1.45419	2.23309
8.122	0.19112	0.238019	0.119059	0.115418	1.55984		1.16784	-0.94283	-0.355	0.769281	0.362761		-1.28984	-0.39534	-0.35288	2.36709	-0.84927		0.861316	0.551452	-0.25022	-1.45831	2.16879
8.13021	0.178968	0.27216	0.262156	0.117724	1.49424		1.17206	-0.91803	-0.31816	0.77664	0.437408		-1.30627	-0.29636	-0.38575	2.29963	-0.89105		0.887733	0.71943	-0.29473	-1.45982	2.04811
8.13841	0.204727	0.353942	0.35661	0.046112	1.44893		1.16638	-0.93041	-0.26756	0.781111	0.511247		-1.33521	-0.22428	-0.40032	2.19971	-0.96585		0.918177	0.810813	-0.34375	-1.47462	1.90387
8.14661	0.245321	0.456626	0.398284	-0.0755	1.42175		1.13184	-0.95766	-0.22214	0.814533	0.58881		-1.36235	-0.15653	-0.41292	2.01467	-1.03267		0.925062	0.816701	-0.38478	-1.49697	1.76479
8.15482	0.258486	0.551324	0.407462	-0.1757	1.39864		1.06552	-0.96812	-0.19576	0.852247	0.689312		-1.36947	-0.04892	-0.42558	1.75025	-1.04764		0.886912	0.772967	-0.41126	-1.50734	1.63985
8.16302	0.229805	0.640042	0.40464	-0.20304	1.37259		0.982406	-0.94227	-0.1924	0.838764	0.832949		-1.35489	0.149462	-0.43609	1.4642	-0.99075		0.806727	0.719146	-0.4206	-1.4917	1.51432
8.17122	0.184197	0.738081	0.384477	-0.14987	1.34435		0.892781	-0.89162	-0.20237	0.749104	1.01703		-1.3373	0.462906	-0.44497	1.22188	-0.88881		0.706304	0.687631	-0.40661	-1.43791	1.37844
8.17943	0.158061	0.854141	0.332453	-0.07679	1.31744		0.800377	-0.84592	-0.21055	0.619625	1.23176		-1.34017	0.878224	-0.46839	1.07566	-0.79458		0.610649	0.683393	-0.37449	-1.34155	1.24801
8.18763	0.163458	0.977671	0.241275	-0.05204	1.29586		0.710895	-0.81223	-0.21331	0.533888	1.45875		-1.37303	1.33182	-0.52234	1.03126	-0.73742		0.54725	0.69686	-0.34744	-1.2184	1.1604
8.19575	0.183118	1.08566	0.119596	-0.0965	1.26436		0.65322	-0.7904	-0.20907	0.543007	1.68751		-1.42349	1.74422	-0.59663	1.05793	-0.71268		0.538836	0.714921	-0.34522	-1.12542	1.13444
8.20395	0.185788	1.17234	-0.00847	-0.16436	1.21119		0.656545	-0.78866	-0.20345	0.634558	1.89342		-1.47525	2.05896	-0.66969	1.09782	-0.68589		0.574856	0.722922	-0.36897	-1.12589	1.151
8.21216	0.145831	1.24412	-0.12512	-0.19475	1.13695		0.705914	-0.82655	-0.19851	0.741744	2.03142		-1.52212	2.26729	-0.72404	1.09464	-0.63875		0.614513	0.724506	-0.39204	-1.24277	1.17349
8.22036	0.066384	1.31686	-0.21787	-0.19882	1.05736		0.754211	-0.90489	-0.19613	0.807696	2.08152		-1.56433	2.38448	-0.7592	1.02611	-0.59169		0.601322	0.71774	-0.39548	-1.42059	1.17498
8.22856	-0.03404	1.38224	-0.28342	-0.21487	1.0013		0.751859	-0.99374	-0.20208	0.806828	2.06731		-1.59419	2.42869	-0.78592	0.914026	-0.57646		0.522001	0.707204	-0.38021	-1.5488	1.15631
8.23677	-0.13127	1.41537	-0.32912	-0.25961	0.975857		0.691027	-1.04587	-0.21198	0.745513	2.03195		-1.58157	2.4209	-0.81392	0.817517	-0.60698		0.424818	0.688918	-0.35609	-1.55915	1.12587
8.24497	-0.20529	1.39801	-0.36682	-0.29786	0.96509		0.594771	-1.04117	-0.22582	0.663367	1.98732		-1.51404	2.38118	-0.85108	0.766249	-0.6566		0.364016	0.649317	-0.33456	-1.45439	1.08612
8.25317	-0.24876	1.34071	-0.40877	-0.28631	0.951023		0.486604	-1.01511	-0.23949	0.598295	1.92006		-1.40968	2.31758	-0.90116	0.745929	-0.69427		0.353911	0.57418	-0.31143	-1.29501	1.03305
8.26138	-0.25727	1.29599	-0.46028	-0.24992	0.9287		0.386399	-1.00508	-0.25162	0.558381	1.82744		-1.31656	2.23363	-0.96411	0.736097	-0.70627		0.358709	0.461184	-0.28713	-1.13888	0.966309
8.26958	-0.23526	1.32121	-0.5229	-0.24718	0.893556		0.307842	-1.01073	-0.2665	0.508278	1.71631		-1.26947	2.12592	-1.02915	0.725051	-0.7008		0.34917	0.332497	-0.26325	-1.02969	0.902168
8.27778	-0.19056	1.42464	-0.58824	-0.30729	0.831538		0.264793	-0.99566	-0.2884	0.441077	1.61139		-1.2591	2.00254	-1.09203	0.729831	-0.69434		0.325682	0.222241	-0.24013	-1.00824	0.85222
8.2859	-0.13734	1.55077	-0.65232	-0.3951	0.733428		0.256473	-0.94007	-0.32017	0.407584	1.53035		-1.25437	1.87502	-1.15257	0.745846	-0.69302		0.313291	0.154551	-0.21474	-1.07959	0.820566
8.29411	-0.09042	1.62464	-0.71015	-0.46444	0.606694		0.280504	-0.87119	-0.34291	0.446855	1.48187		-1.22554	1.74865	-1.20779	0.744717	-0.6979		0.340352	0.123016	-0.17993	-1.20811	0.790504
8.30231	-0.0601	1.61434	-0.75292	-0.49221	0.481378		0.319936	-0.83262	-0.33297	0.548405	1.47042		-1.16314	1.61845	-1.24654	0.703507	-0.70289		0.412781	0.102909	-0.14224	-1.30347	0.734953
8.31051	-0.06431	1.54254	-0.77647	-0.4695	0.379988		0.354164	-0.84741	-0.27821	0.653962	1.48999		-1.07206	1.48037	-1.25233	0.636354	-0.70778		0.518583	0.066192	-0.0988	-1.28373	0.645467
8.31871	-0.09998	1.45804	-0.77915	-0.40465	0.308872		0.367304	-0.88077	-0.19796	0.739687	1.5469		-0.96753	1.34563	-1.22502	0.596166	-0.71253		0.620677	-0.00356	-0.04457	-1.15593	0.531558
8.32692	-0.14663	1.38839	-0.77271	-0.31185	0.264035		0.349202	-0.88382	-0.12559	0.838705	1.64788		-0.87574	1.22626	-1.18123	0.61261	-0.72131		0.659343	-0.09043	0.018981	-0.98951	0.423493
8.33512	-0.18678	1.33941	-0.76156	-0.2138	0.237889		0.30818	-0.84844	-0.07183	0.963119	1.79721		-0.81659	1.12945	-1.14585	0.677706	-0.72989		0.584671	-0.16798	0.078944	-0.8624	0.342632
8.34333	-0.22012	1.29914	-0.74721	-0.1389	0.225525		0.263877	-0.79363	-0.02254	1.08051	1.9855		-0.79944	1.04791	-1.13266	0.749128	-0.72069		0.383993	-0.21663	0.108634	-0.79112	0.294743
8.35153	-0.26088	1.25583	-0.74406	-0.1226	0.215414		0.24258	-0.74483	0.040423	1.14809	2.18731		-0.81759	0.968269	-1.12733	0.782894	-0.68934		0.107794	-0.22224	0.090256	-0.75236	0.280525
8.35973	-0.30601	1.19852	-0.76474	-0.17919	0.208682		0.251998	-0.70164	0.107465	1.21896	2.38161		-0.86061	0.880901	-1.11488	0.750019	-0.64077		-0.16797	-0.18101	0.030806	-0.73837	0.285972
8.36793	-0.32994	1.11053	-0.80983	-0.28594	0.216308		0.282453	-0.64531	0.148224	1.40719	2.53971		-0.91778	0.782914	-1.09444	0.649765	-0.58614		-0.38448	-0.09612	-0.03568	-0.74977	0.295367
8.37605	-0.31216	0.9971	-0.856	-0.40514	0.255487		0.318338	-0.56104	0.140723	1.74901	2.63654		-0.97576	0.683854	-1.0854	0.531724	-0.52259		-0.52105	0.002706	-0.07332	-0.76894	0.296545
8.38426	-0.26542	0.883957	-0.88983	-0.4919	0.33737		0.337472	-0.46341	0.095016	2.17096	2.65768		-1.01731	0.592977	-1.1072	0.473476	-0.43446		-0.58449	0.069598	-0.06198	-0.748	0.292072
8.39246	-0.22381	0.799032	-0.9142	-0.52746	0.448639		0.339018	-0.37621	0.037979	2.57016	2.62627		-1.03603	0.526585	-1.15682	0.542746	-0.3095		-0.57693	0.072714	-0.0176	-0.67668	0.289786
8.40066	-0.208	0.745797	-0.94984	-0.51684	0.575665		0.333458	-0.30441	-0.01491	2.90762	2.58312		-1.0479	0.490935	-1.21031	0.72492	-0.14007		-0.50919	0.027217	0.023883	-0.60961	0.302464
8.40887	-0.21577	0.706814	-1.00683	-0.46517	0.708488		0.322261	-0.24398	-0.05601	3.15605	2.53509		-1.06413	0.467158	-1.24045	0.929293	0.058055		-0.38995	-0.01396	0.053186	-0.6233	0.336596
8.41707	-0.23023	0.688179	-1.06286	-0.38421	0.857014		0.301139	-0.19361	-0.07331	3.28768	2.45472		-1.08997	0.432849	-1.24272	1.07201	0.261079		-0.23658	-0.01752	0.102369	-0.7407	0.385885
8.42527	-0.24571	0.710147	-1.09686	-0.27644	1.03802		0.267183	-0.16716	-0.05606	3.28166	2.32672		-1.12277	0.370789	-1.2313	1.11053	0.443398		-0.06239	0.013196	0.221193	-0.89429	0.446761
8.43348	-0.2622	0.778574	-1.11165	-0.15841	1.23549		0.231175	-0.17997	-0.00966	3.15884	2.18108		-1.15605	0.295098	-1.22677	1.06178	0.584802		0.120858	0.054124	0.42274	-0.97576	0.50913
8.44168	-0.28075	0.849598	-1.12305	-0.03709	1.39997		0.196628	-0.22679	0.032834	2.98046	2.06334		-1.1779	0.229544	-1.2347	0.949517	0.685907		0.297914	0.079361	0.663828	-0.91668	0.551706
8.44988	-0.30055	0.860713	-1.14255	0.076241	1.46577		0.158022	-0.29278	0.04714	2.79106	2.00341		-1.16207	0.19059	-1.24377	0.819729	0.74872		0.446182	0.084484	0.879851	-0.76803	0.553817
8.45809	-0.31552	0.786188	-1.17445	0.149743	1.41753		0.106666	-0.37132	0.032094	2.61506	2.00669		-1.09443	0.165304	-1.24297	0.715171	0.77586		0.523395	0.070984	1.02036	-0.65342	0.521609
8.46621	-0.31238	0.663067	-1.21142	0.178742	1.30061		0.048094	-0.46989	0.001022	2.46553	2.0371		-0.98563	0.118895	-1.22737	0.647197	0.770135		0.504607	0.043859	1.07415	-0.66453	0.488299
8.47441	-0.26426	0.562965	-1.24462	0.184949	1.18217		0.008604	-0.58192	-0.03946	2.35876	2.04985		-0.87907	0.05084	-1.20109	0.616367	0.740067		0.403341	0.00439	1.05607	-0.78598	0.484159
8.48261	-0.15912	0.527446	-1.27223	0.210963	1.11051		-0.00145	-0.68518	-0.09626	2.28686	2.00432		-0.81128	-0.02419	-1.16875	0.600304	0.686443		0.280378	-0.04781	0.99674	-0.88898	0.530421
8.49082	-0.01647	0.538896	-1.28607	0.279068	1.09424		0.002103	-0.7535	-0.15258	2.20671	1.89905		-0.78317	-0.0922	-1.1379	0.591934	0.595947		0.213327	-0.11214	0.935679	-0.86637	0.631413
8.49902	0.117746	0.545927	-1.28081	0.374637	1.11774		0.003967	-0.76733	-0.17302	2.08905	1.77686		-0.78633	-0.15087	-1.10704	0.58436	0.462958		0.229094	-0.18516	0.895845	-0.71245	0.786638
8.50722	0.193225	0.515003	-1.26403	0.473286	1.15116		0.009182	-0.74002	-0.13717	1.92577	1.68626		-0.81523	-0.20008	-1.06951	0.571091	0.303074		0.287702	-0.25837	0.875174	-0.51106	1.00623
8.51543	0.204597	0.454351	-1.24485	0.565289	1.16597		0.027693	-0.69359	-0.06401	1.73928	1.64009		-0.86487	-0.23286	-1.02785	0.54472	0.152978		0.311628	-0.32563	0.855796	-0.35053	1.28277
8.52363	0.183508	0.392174	-1.229	0.649266	1.14078		0.058564	-0.66277	0.004409	1.55746	1.59847		-0.92224	-0.24673	-0.98345	0.493118	0.046353		0.267428	-0.37153	0.827602	-0.26611	1.59672
8.53183	0.170499	0.349245	-1.21276	0.69063	1.07876		0.093488	-0.68325	0.042581	1.41169	1.53157		-0.96495	-0.25736	-0.94127	0.423076	-0.00647		0.193053	-0.3823	0.790261	-0.25526	1.92374
8.54004	0.175266	0.323747	-1.19138	0.653142	1.01461		0.123845	-0.75624	0.051808	1.32603	1.44917		-0.99027	-0.29504	-0.90713	0.358645	-0.02152		0.143708	-0.34462	0.73292	-0.27571	2.23995
8.54824	0.182846	0.307504	-1.15601	0.530951	0.983841		0.154131	-0.84903	0.049469	1.2798	1.38377		-1.01532	-0.36061	-0.88069	0.351488	-0.02802		0.135018	-0.25829	0.647863	-0.26647	2.51214
8.55644	0.186658	0.299824	-1.10433	0.366861	1.02266		0.179566	-0.90786	0.040072	1.24054	1.35925		-1.0585	-0.42451	-0.86322	0.449626	-0.0455		0.13148	-0.13897	0.543388	-0.16809	2.70562
8.56456	0.197648	0.299387	-1.04174	0.219417	1.14571		0.190893	-0.90836	0.01906	1.16833	1.37319		-1.10448	-0.46325	-0.85269	0.636924	-0.09079		0.099833	-0.00684	0.447736	0.034689	2.80821
8.57277	0.234117	0.306534	-0.96927	0.103266	1.34054		0.191192	-0.85669	-0.0127	1.04069	1.41438		-1.12794	-0.47513	-0.84976	0.828111	-0.16274		0.040921	0.107688	0.385786	0.271187	2.82934
8.58097	0.294923	0.313426	-0.88775	0.016424	1.55998		0.191932	-0.78635	-0.04285	0.876276	1.46791		-1.11999	-0.47547	-0.8504	0.936177	-0.24195		-0.00604	0.192522	0.356044	0.446725	2.79059
8.58917	0.347981	0.321004	-0.80227	-0.04456	1.73448		0.197882	-0.72606	-0.05537	0.720497	1.51706		-1.10299	-0.46506	-0.85412	0.934286	-0.30543		-0.00884	0.245637	0.331874	0.518307	2.72618
8.59738	0.356489	0.331966	-0.72162	-0.06789	1.82096		0.194017	-0.67172	-0.05535	0.622169	1.54415		-1.1143	-0.4357	-0.87154	0.847468	-0.33564		0.02768	0.277119	0.28678	0.512783	2.67156
8.60558	0.320098	0.34446	-0.65607	-0.08291	1.81634		0.175247	-0.61504	-0.0613	0.599876	1.53461		-1.1679	-0.3697	-0.90512	0.754633	-0.3453		0.078823	0.294942	0.219622	0.464744	2.65071
8.61378	0.276776	0.356152	-0.60802	-0.14912	1.76102		0.154528	-0.55843	-0.09308	0.637602	1.48347		-1.24626	-0.26607	-0.94713	0.757522	-0.34905		0.121452	0.294335	0.143532	0.385835	2.65679
8.62198	0.262468	0.349813	-0.57504	-0.28283	1.70216		0.144226	-0.51881	-0.14229	0.689727	1.39074		-1.30942	-0.16148	-0.98597	0.897357	-0.36027		0.149935	0.275911	0.079845	0.273575	2.65117
8.63019	0.288357	0.31708	-0.54392	-0.44465	1.66932		0.142499	-0.50858	-0.18234	0.711318	1.26131		-1.33114	-0.10016	-1.01918	1.12069	-0.39277		0.164846	0.240144	0.036136	0.140345	2.58395
8.63839	0.345221	0.264983	-0.50053	-0.55163	1.67079		0.124008	-0.5183	-0.20691	0.689037	1.10075		-1.31632	-0.10709	-1.05196	1.28862	-0.45635		0.173062	0.19581	0.006665	0.03214	2.44169
8.6466	0.422583	0.208313	-0.43769	-0.57236	1.68152		0.08077	-0.51846	-0.22357	0.64388	0.933464		-1.28761	-0.15971	-1.09252	1.30131	-0.55423		0.175255	0.150854	-0.01304	-0.0387	2.24485
8.65472	0.522787	0.169038	-0.35237	-0.55391	1.66049		0.023725	-0.49	-0.23966	0.612717	0.785845		-1.2736	-0.21121	-1.14167	1.18141	-0.66921		0.157918	0.107384	-0.02959	-0.08324	2.02991
8.66292	0.640678	0.1641	-0.25601	-0.54994	1.57491		-0.04388	-0.44523	-0.238	0.619779	0.668679		-1.27702	-0.24058	-1.18659	1.05171	-0.78608		0.125917	0.077183	-0.04097	-0.10794	1.82814
8.67112	0.754055	0.204878	-0.16201	-0.56804	1.42854		-0.13756	-0.40757	-0.19694	0.667303	0.581986		-1.29025	-0.26206	-1.21053	1.00313	-0.88578		0.103456	0.082253	-0.05276	-0.10024	1.66348
8.67932	0.833469	0.285755	-0.08322	-0.55928	1.2463		-0.25805	-0.39549	-0.1118	0.719617	0.508537		-1.30172	-0.30715	-1.19533	1.00332	-0.96741		0.128571	0.144926	-0.06814	-0.04134	1.54297
8.68753	0.879083	0.380628	-0.01812	-0.49687	1.04085		-0.36668	-0.40308	0.008052	0.741364	0.433764		-1.30017	-0.37833	-1.14016	0.990025	-1.03897		0.219583	0.256701	-0.09007	0.062458	1.44558
8.69573	0.902524	0.444169	0.039716	-0.40362	0.816079		-0.4267	-0.40746	0.148596	0.752635	0.347283		-1.28577	-0.45625	-1.0664	0.934001	-1.0924		0.344499	0.38478	-0.12664	0.195757	1.34878
8.70393	0.901426	0.439567	0.103339	-0.32342	0.596768		-0.43947	-0.4029	0.304921	0.774845	0.250716		-1.26047	-0.51663	-1.01191	0.848989	-1.1175		0.448178	0.488402	-0.17463	0.323739	1.2443
8.71214	0.873342	0.386084	0.181181	-0.27304	0.4333		-0.44084	-0.40156	0.461206	0.8052	0.157304		-1.23654	-0.53769	-0.99901	0.761755	-1.11072		0.490001	0.545279	-0.2302	0.424514	1.13657
8.72034	0.820252	0.339158	0.261093	-0.22343	0.368095		-0.46307	-0.42818	0.591017	0.816209	0.068351		-1.23276	-0.52099	-1.00699	0.671856	-1.07428		0.482393	0.556224	-0.28363	0.496211	1.04155
8.72854	0.753847	0.351688	0.328316	-0.14698	0.399488		-0.50787	-0.48577	0.676343	0.810835	-0.01712		-1.26147	-0.49081	-1.00468	0.574254	-1.0154		0.457342	0.524663	-0.32289	0.535109	0.958139
8.73675	0.687338	0.42037	0.371349	-0.05826	0.488646		-0.55068	-0.55604	0.716648	0.829978	-0.09928		-1.31776	-0.47994	-0.97634	0.479695	-0.96253		0.431145	0.453454	-0.34141	0.565198	0.871289
8.74487	0.625272	0.50415	0.396559	-0.01636	0.584523		-0.55737	-0.61821	0.721475	0.894099	-0.16498		-1.38635	-0.50103	-0.93167	0.424324	-0.9529		0.40499	0.350387	-0.34745	0.602361	0.765434
8.75307	0.579164	0.559435	0.408163	-0.04356	0.651975		-0.49454	-0.65097	0.707295	0.981013	-0.20295		-1.46206	-0.53705	-0.89392	0.418344	-1.00343		0.386307	0.247168	-0.36339	0.639444	0.636521
8.76128	0.555607	0.573292	0.399797	-0.09611	0.662338		-0.33054	-0.6598	0.695695	1.02592	-0.22021		-1.53355	-0.54852	-0.87896	0.418237	-1.10262		0.387694	0.176197	-0.40646	0.664526	0.503666
8.76948	0.549151	0.561871	0.376275	-0.11083	0.6143		-0.04792	-0.6623	0.701202	0.994852	-0.23007		-1.58648	-0.51969	-0.89736	0.358978	-1.21284		0.404983	0.143309	-0.47208	0.677033	0.381231
8.77768	0.536161	0.527759	0.363574	-0.07141	0.538109		0.347799	-0.67312	0.72068	0.901162	-0.24774		-1.61187	-0.47449	-0.94269	0.219322	-1.30907		0.417069	0.133994	-0.52823	0.680834	0.284736
8.78588	0.497938	0.474203	0.415242	-0.03148	0.47935		0.844952	-0.69726	0.738728	0.774346	-0.27117		-1.61197	-0.42662	-0.99572	0.070106	-1.38852		0.40896	0.127822	-0.53864	0.673174	0.227609
8.79409	0.440216	0.414397	0.569934	-0.02817	0.462414		1.41609	-0.72316	0.745643	0.655579	-0.28563		-1.60087	-0.36598	-1.03282	0.023213	-1.44521		0.388706	0.124528	-0.49238	0.656407	0.221632
8.80229	0.388159	0.371803	0.828695	-0.0444	0.468212		2.03122	-0.74278	0.750552	0.581292	-0.27652		-1.59619	-0.27746	-1.04736	0.123063	-1.45676		0.366351	0.128515	-0.41225	0.62409	0.26888
8.81049	0.364244	0.356691	1.1613	-0.03663	0.476495		2.64964	-0.75973	0.75196	0.578451	-0.25104		-1.61184	-0.17149	-1.05713	0.297247	-1.39476		0.329199	0.118871	-0.3395	0.568712	0.35461
8.8187	0.357964	0.352446	1.5257	-0.0045	0.482789		3.22104	-0.78903	0.731633	0.630373	-0.23993		-1.63994	-0.08601	-1.06975	0.437082	-1.275		0.260811	0.066555	-0.30508	0.48955	0.448639
8.8269	0.348137	0.341375	1.88997	-0.00556	0.496856		3.69086	-0.83172	0.673527	0.690975	-0.26399		-1.66931	-0.04357	-1.06983	0.48451	-1.14049		0.165284	-0.02935	-0.31237	0.40831	0.516343
8.83502	0.323281	0.309298	2.23418	-0.05856	0.529038		4.02224	-0.87229	0.593718	0.719261	-0.31899		-1.68096	-0.0333	-1.04064	0.448853	-1.01811		0.084597	-0.12399	-0.33269	0.359008	0.543344
8.84322	0.299847	0.263247	2.53071	-0.1431	0.576725		4.19561	-0.88657	0.533843	0.69516	-0.37003		-1.66011	-0.01204	-0.9912	0.390236	-0.90767		0.048415	-0.17479	-0.33922	0.338841	0.538445
8.85143	0.301587	0.227043	2.75006	-0.21644	0.643839		4.24294	-0.85414	0.511768	0.615499	-0.39279		-1.62253	0.045742	-0.94796	0.345044	-0.79379		0.042407	-0.18988	-0.32971	0.29976	0.527144
8.85963	0.32682	0.219458	2.87742	-0.25202	0.732381		4.23014	-0.78885	0.512847	0.478244	-0.39367		-1.59956	0.130711	-0.92931	0.34326	-0.67857		0.030695	-0.20173	-0.31369	0.166656	0.519574
8.86783	0.341447	0.245765	2.91984	-0.26014	0.835195		4.21005	-0.72494	0.50528	0.328921	-0.40235		-1.61151	0.213309	-0.9317	0.401294	-0.58055		-0.01192	-0.22676	-0.3028	-0.06532	0.500038
8.87604	0.300301	0.279563	2.90744	-0.24349	0.929045		4.18838	-0.69724	0.468236	0.234588	-0.438		-1.64578	0.26079	-0.93444	0.496424	-0.52872		-0.07463	-0.2535	-0.28889	-0.30186	0.449519
8.88424	0.2093	0.2793	2.88319	-0.20616	0.987989		4.14455	-0.70752	0.40287	0.241532	-0.47558		-1.67643	0.277229	-0.92711	0.592825	-0.53542		-0.13399	-0.28225	-0.25554	-0.43287	0.360033
8.89244	0.117253	0.220851	2.87742	-0.15871	1.00869		4.0597	-0.73425	0.312948	0.332452	-0.47854		-1.6926	0.290474	-0.91485	0.666684	-0.58259		-0.16615	-0.33303	-0.20229	-0.42575	0.259846
8.90065	0.073515	0.12613	2.89686	-0.13033	1.00875		3.94357	-0.75819	0.210439	0.440875	-0.42711		-1.69456	0.323834	-0.91022	0.732767	-0.63371		-0.16046	-0.4204	-0.1417	-0.36219	0.185902
8.90885	0.090045	0.037559	2.90957	-0.13617	1.01325		3.82273	-0.76681	0.113684	0.524626	-0.34125		-1.70413	0.374174	-0.91132	0.805616	-0.64869		-0.13783	-0.52623	-0.0887	-0.34082	0.149787
8.91705	0.139089	-0.03119	2.87307	-0.15914	1.02881		3.71936	-0.74872	0.039924	0.558369	-0.27049		-1.73756	0.417475	-0.89632	0.861331	-0.619		-0.11675	-0.6043	-0.04593	-0.3873	0.137692
8.92517	0.191107	-0.0922	2.77415	-0.18581	1.05575		3.62829	-0.66237	-0.01296	0.528716	-0.24826		-1.79172	0.438662	-0.8544	0.854185	-0.57349		-0.11309	-0.61851	-0.01408	-0.45409	0.121743
8.93338	0.220341	-0.15087	2.63362	-0.21639	1.09247		3.5255	-0.44959	-0.06479	0.426655	-0.27631		-1.83562	0.444599	-0.78992	0.765547	-0.54504		-0.13611	-0.55822	0.00648	-0.4799	0.082927
8.94158	0.209722	-0.17577	2.49271	-0.25395	1.13408		3.39311	-0.07007	-0.11995	0.282314	-0.32358		-1.83494	0.449398	-0.73088	0.644332	-0.54633		-0.18799	-0.44539	0.02214	-0.47521	0.013526
8.94978	0.15265	-0.12697	2.36259	-0.29333	1.16771		3.22954	0.468296	-0.16722	0.17634	-0.36555		-1.78366	0.456677	-0.70418	0.549273	-0.57228		-0.25616	-0.30548	0.031032	-0.48038	-0.07306
8.95799	0.063078	0.006853	2.21886	-0.3412	1.16989		3.06152	1.08353	-0.1929	0.166531	-0.39791		-1.71146	0.46912	-0.70916	0.507398	-0.61476		-0.31546	-0.15903	0.031418	-0.51764	-0.15156
8.96619	-0.02229	0.192085	2.04606	-0.41063	1.14168		2.91823	1.66203	-0.20101	0.232436	-0.42248		-1.66053	0.493692	-0.72477	0.512891	-0.65455		-0.34809	-0.01711	0.020915	-0.5734	-0.20694
8.97439	-0.07762	0.369579	1.86682	-0.507	1.11228		2.81038	2.11331	-0.20497	0.283491	-0.45069		-1.64127	0.545555	-0.73036	0.551509	-0.67499		-0.35003	0.12874	0.003449	-0.61528	-0.23443
8.98259	-0.09867	0.496478	1.72529	-0.61982	1.12827		2.72924	2.41023	-0.2154	0.255514	-0.49405		-1.63347	0.650085	-0.73362	0.621075	-0.66448		-0.33818	0.282769	-0.00839	-0.63709	-0.24393
8.9908	-0.09915	0.547802	1.6335	-0.69777	1.22098		2.66033	2.57336	-0.23549	0.176887	-0.56192		-1.61879	0.830627	-0.75478	0.704196	-0.63377		-0.32881	0.436231	-0.00299	-0.65729	-0.24753
8.999	-0.09245	0.53266	1.56802	-0.70003	1.38337		2.6038	2.6262	-0.26693	0.110127	-0.64558		-1.59694	1.09706	-0.79914	0.764156	-0.60764		-0.31989	0.569625	0.013531	-0.68444	-0.2536
9.0072	-0.07855	0.478331	1.50469	-0.63066	1.59303		2.55034	2.58754	-0.32187	0.088214	-0.72356		-1.57466	1.41364	-0.84628	0.77066	-0.59625		-0.30031	0.670217	0.017237	-0.68876	-0.26566
9.01533	-0.06261	0.413974	1.43451	-0.55276	1.82852		2.49035	2.48416	-0.39484	0.095811	-0.78068		-1.54826	1.71389	-0.86411	0.737274	-0.59768		-0.27418	0.741696	-0.00184	-0.64372	-0.28264
9.02353	-0.05418	0.370841	1.36452	-0.53975	2.08508		2.4257	2.35564	-0.46061	0.119519	-0.81941		-1.51509	1.94053	-0.84584	0.698894	-0.60157		-0.26357	0.789272	-0.036	-0.57798	-0.29735
9.03173	-0.05897	0.350477	1.29584	-0.61745	2.3602		2.35645	2.23782	-0.49262	0.172167	-0.85607		-1.47035	2.07585	-0.80725	0.688954	-0.6153		-0.28416	0.824022	-0.06328	-0.56408	-0.29809
9.03994	-0.06545	0.341317	1.21859	-0.7583	2.63542		2.28363	2.13228	-0.48584	0.26625	-0.89564		-1.40924	2.12716	-0.7677	0.738914	-0.65362		-0.33599	0.825441	-0.07731	-0.64242	-0.28704
9.04814	-0.06698	0.333994	1.12331	-0.87695	2.88607		2.19451	2.02465	-0.46547	0.374114	-0.93153		-1.33523	2.10477	-0.73117	0.846362	-0.72015		-0.40489	0.762814	-0.09534	-0.76987	-0.27372
9.05634	-0.06722	0.329793	1.02043	-0.89061	3.09296		2.07863	1.91044	-0.45477	0.449566	-0.95369		-1.24618	2.03093	-0.69932	0.99062	-0.80979		-0.46634	0.632259	-0.13387	-0.8741	-0.26194
9.06455	-0.07407	0.339493	0.937181	-0.77809	3.26823		1.94813	1.79694	-0.46391	0.481431	-0.96503		-1.14587	1.94366	-0.68566	1.12665	-0.89542		-0.50376	0.469964	-0.19366	-0.91063	-0.24192
9.07275	-0.09145	0.369265	0.89028	-0.58147	3.43799		1.83572	1.67953	-0.48617	0.482917	-0.97363		-1.03276	1.88442	-0.699	1.21988	-0.95052		-0.51012	0.318159	-0.23787	-0.91001	-0.20588
9.08095	-0.10655	0.420319	0.871207	-0.39838	3.6259		1.76074	1.55891	-0.51286	0.479433	-0.98205		-0.90595	1.88281	-0.7271	1.2873	-0.96875		-0.50391	0.201658	-0.23012	-0.91553	-0.16939
9.08915	-0.1165	0.481781	0.844239	-0.29764	3.82366		1.70423	1.4366	-0.53935	0.480503	-0.99541		-0.77978	1.91759	-0.73868	1.36519	-0.96933		-0.50092	0.119933	-0.17188	-0.92428	-0.14755
9.09736	-0.12962	0.540895	0.78129	-0.26401	3.99662		1.64251	1.31785	-0.55506	0.486555	-1.0032		-0.67935	1.94017	-0.71958	1.49528	-0.9789		-0.49858	0.072852	-0.10954	-0.93066	-0.14712
9.10556	-0.15578	0.572424	0.688036	-0.21581	4.1018		1.57446	1.20704	-0.55985	0.512463	-0.99587		-0.63113	1.91265	-0.68312	1.67596	-1.00652		-0.48176	0.076635	-0.09385	-0.9331	-0.16505
9.11368	-0.1932	0.551179	0.59448	-0.09567	4.116		1.51377	1.0935	-0.56063	0.558203	-0.97805		-0.62935	1.82799	-0.66203	1.87403	-1.05054		-0.43775	0.131776	-0.12622	-0.92876	-0.19831
9.12189	-0.22019	0.488083	0.521477	0.079582	4.05892		1.47467	0.984446	-0.56765	0.604501	-0.96356		-0.64706	1.70473	-0.68636	2.05736	-1.10132		-0.38546	0.205111	-0.18413	-0.90659	-0.24109
9.13009	-0.22543	0.425906	0.45684	0.240485	3.97244		1.45838	0.889675	-0.59041	0.612265	-0.96824		-0.66168	1.56964	-0.74758	2.19623	-1.15318		-0.36321	0.262609	-0.24301	-0.8614	-0.27355
9.13829	-0.21388	0.397615	0.389671	0.319374	3.89751		1.45698	0.814822	-0.62997	0.563719	-0.98867		-0.66959	1.4469	-0.80789	2.28268	-1.19562		-0.39342	0.299075	-0.29823	-0.80609	-0.29261
9.14649	-0.20815	0.380876	0.315945	0.302526	3.8451		1.46202	0.748962	-0.68473	0.481074	-1.0155		-0.68678	1.34952	-0.82519	2.32536	-1.21681		-0.46036	0.336287	-0.34604	-0.74933	-0.3203
9.1547	-0.22372	0.331383	0.240393	0.222841	3.78725		1.48031	0.67214	-0.74816	0.389285	-1.03472		-0.72036	1.29269	-0.78158	2.33626	-1.21624		-0.52633	0.383612	-0.35945	-0.70409	-0.38515
9.1629	-0.24073	0.237173	0.169598	0.137247	3.69507		1.51554	0.587799	-0.81057	0.319956	-1.03277		-0.77148	1.27833	-0.70202	2.29942	-1.20828		-0.57028	0.431492	-0.31735	-0.66546	-0.48893
9.1711	-0.22747	0.141921	0.107114	0.094218	3.54967		1.56242	0.510911	-0.85986	0.277593	-1.00198		-0.83147	1.29116	-0.62955	2.1977	-1.21501		-0.58684	0.457719	-0.23488	-0.62621	-0.59463
9.17931	-0.17473	0.095812	0.062607	0.127212	3.36032		1.60499	0.449537	-0.89501	0.242091	-0.94557		-0.888	1.30878	-0.59981	2.04519	-1.23674		-0.58841	0.442074	-0.15991	-0.60021	-0.67165
9.18751	-0.11874	0.098452	0.033344	0.247893	3.1545		1.62368	0.391853	-0.92042	0.187208	-0.88792		-0.93238	1.30782	-0.62061	1.8717	-1.26503		-0.59391	0.388305	-0.12422	-0.60334	-0.72247
9.19571	-0.09923	0.108218	0.00294	0.412328	2.96437		1.60737	0.326788	-0.93925	0.100127	-0.84858		-0.97584	1.28159	-0.67793	1.70964	-1.29096		-0.61782	0.308482	-0.12604	-0.62882	-0.76982
9.20383	-0.11706	0.087723	-0.05588	0.54573	2.81526		1.55152	0.263423	-0.9488	0.016899	-0.8346		-1.04255	1.23059	-0.74089	1.56341	-1.31372		-0.65808	0.215356	-0.14252	-0.65661	-0.82138
9.21204	-0.1425	0.043299	-0.14901	0.590388	2.70472		1.47535	0.213419	-0.93635	-0.00558	-0.84189		-1.13734	1.16488	-0.77074	1.42256	-1.3393		-0.68938	0.121782	-0.15571	-0.67	-0.87204
9.22024	-0.15118	0.016379	-0.25385	0.554802	2.63518		1.40676	0.182268	-0.89909	0.07133	-0.86443		-1.23741	1.08908	-0.7583	1.27843	-1.3604		-0.69645	0.03939	-0.16657	-0.64457	-0.91071
9.22844	-0.14976	0.027355	-0.34422	0.519609	2.62607		1.36775	0.160526	-0.84747	0.229892	-0.90213		-1.30063	1.00698	-0.73043	1.15639	-1.37253		-0.67567	-0.02561	-0.17459	-0.57305	-0.92723
9.23665	-0.15562	0.070948	-0.40765	0.536111	2.69793		1.38065	0.134584	-0.80457	0.416465	-0.94421		-1.31378	0.940102	-0.72028	1.08845	-1.36953		-0.63935	-0.09019	-0.18149	-0.4859	-0.91842
9.24485	-0.18002	0.114563	-0.45397	0.601802	2.83937		1.45331	0.094645	-0.79194	0.587879	-0.9659		-1.306	0.90564	-0.73958	1.06526	-1.35135		-0.59093	-0.17388	-0.18123	-0.42315	-0.89135
9.25305	-0.21727	0.131345	-0.49976	0.673997	2.9863		1.57802	0.039076	-0.80405	0.745489	-0.94662		-1.30524	0.914743	-0.77535	1.05352	-1.3308		-0.52888	-0.27699	-0.16702	-0.41638	-0.87566
9.26126	-0.25611	0.120062	-0.55536	0.731602	3.07628		1.7251	-0.02918	-0.82515	0.920387	-0.89921		-1.31221	0.942356	-0.81089	1.01378	-1.31557		-0.4576	-0.38117	-0.1418	-0.46278	-0.90306
9.26946	-0.28507	0.112572	-0.61962	0.775226	3.08928		1.85861	-0.10306	-0.84166	1.10438	-0.84685		-1.3019	0.935777	-0.8378	0.938531	-1.31571		-0.37198	-0.45394	-0.10943	-0.53441	-0.98012
9.27766	-0.2927	0.15087	-0.68713	0.789767	3.06438		1.95091	-0.15769	-0.85201	1.25561	-0.80198		-1.26837	0.857511	-0.85809	0.844257	-1.33535		-0.26484	-0.47797	-0.07429	-0.59798	-1.07958
9.28586	-0.2782	0.23923	-0.75383	0.760613	3.05234		1.98244	-0.17451	-0.85998	1.31834	-0.77479		-1.22737	0.702846	-0.86927	0.739949	-1.3767		-0.12875	-0.46304	-0.02872	-0.64215	-1.15185
9.29399	-0.25128	0.343767	-0.81424	0.672605	3.06737		1.96088	-0.15414	-0.86397	1.27236	-0.76584		-1.19987	0.509642	-0.87643	0.64369	-1.43604		0.012317	-0.44326	0.035853	-0.67517	-1.16703
9.30219	-0.23486	0.412486	-0.8607	0.541652	3.09134		1.90886	-0.11712	-0.86693	1.15636	-0.77514		-1.19805	0.335941	-0.88739	0.56561	-1.50316		0.107164	-0.4438	0.113663	-0.67484	-1.12378
9.31039	-0.24156	0.414733	-0.88661	0.403969	3.1081		1.86758	-0.08875	-0.86712	1.02295	-0.7986		-1.21319	0.230259	-0.90378	0.529168	-1.56711		0.13857	-0.46291	0.190746	-0.62382	-1.04875
9.3186	-0.25873	0.361928	-0.89454	0.278758	3.12834		1.87783	-0.08154	-0.86785	0.891507	-0.83228		-1.23614	0.212383	-0.91776	0.538466	-1.61325		0.139377	-0.48326	0.241269	-0.53371	-0.98525
9.3268	-0.27228	0.288468	-0.89359	0.168897	3.16941		1.95453	-0.11126	-0.87324	0.744146	-0.87493		-1.26347	0.242746	-0.92012	0.555848	-1.64003		0.172354	-0.47639	0.254924	-0.45686	-0.965
9.335	-0.26695	0.217853	-0.88936	0.067169	3.24358		2.07412	-0.17924	-0.89041	0.588117	-0.91929		-1.29099	0.260111	-0.92074	0.556086	-1.65788		0.266989	-0.41673	0.23904	-0.44919	-1.00091
9.34321	-0.23995	0.155647	-0.88792	-0.03104	3.34171		2.1962	-0.28397	-0.93453	0.454168	-0.95198		-1.30997	0.223724	-0.92933	0.551235	-1.67827		0.404841	-0.29499	0.206648	-0.4977	-1.07713
9.35141	-0.20171	0.118042	-0.88631	-0.12182	3.42879		2.29772	-0.42213	-1.00822	0.349074	-0.94869		-1.30307	0.147632	-0.94423	0.584086	-1.69927		0.550003	-0.12688	0.170936	-0.54155	-1.16809
9.35961	-0.17592	0.119333	-0.88659	-0.17407	3.46349		2.36666	-0.5642	-1.08913	0.256263	-0.91159		-1.26631	0.070503	-0.95715	0.670382	-1.71134		0.670071	0.042341	0.136038	-0.52485	-1.25093
9.36781	-0.18964	0.156012	-0.89575	-0.16699	3.42012		2.40163	-0.67435	-1.14069	0.149434	-0.87553		-1.21031	0.020047	-0.95688	0.77286	-1.7155		0.748671	0.158347	0.101318	-0.44768	-1.30811
9.37602	-0.25542	0.206957	-0.91495	-0.1013	3.32484		2.406	-0.71845	-1.15328	0.046172	-0.87483		-1.15886	-0.00632	-0.94641	0.820775	-1.72268		0.789899	0.185657	0.061143	-0.36537	-1.33964
9.38414	-0.35123	0.247384	-0.93942	0.003607	3.23158		2.38631	-0.69461	-1.14853	-0.02663	-0.90765		-1.13073	-0.02438	-0.92655	0.76783	-1.7493		0.825714	0.150458	0.016342	-0.31306	-1.35723
9.39234	-0.42279	0.294259	-0.96112	0.10952	3.17516		2.34349	-0.63069	-1.15334	-0.0761	-0.9352		-1.1314	-0.04439	-0.89142	0.639849	-1.78691		0.886905	0.101199	-0.02805	-0.2777	-1.37667
9.40055	-0.42969	0.391364	-0.97858	0.178849	3.13614		2.2696	-0.57089	-1.17648	-0.12667	-0.92303		-1.15099	-0.08146	-0.82869	0.501726	-1.80886		0.966623	0.080952	-0.06543	-0.22541	-1.40299
9.40875	-0.38148	0.583634	-1.00146	0.180549	3.06145		2.18495	-0.55011	-1.20064	-0.19052	-0.87546		-1.16541	-0.13501	-0.73562	0.403161	-1.80371		1.03188	0.102176	-0.09039	-0.16025	-1.42491
9.41695	-0.32211	0.89602	-1.0415	0.127771	2.93505		2.13328	-0.57555	-1.20881	-0.24735	-0.83562		-1.16466	-0.19657	-0.61706	0.343462	-1.78539		1.05899	0.154109	-0.10556	-0.11192	-1.43218
9.42516	-0.28766	1.3278	-1.09289	0.079867	2.77426		2.14583	-0.63963	-1.19462	-0.27287	-0.84636		-1.14613	-0.25594	-0.47211	0.298162	-1.78585		1.06606	0.220868	-0.11423	-0.10882	-1.42772
9.43336	-0.27959	1.86269	-1.12084	0.089807	2.60549		2.20432	-0.72435	-1.17021	-0.2664	-0.91818		-1.11684	-0.29967	-0.30165	0.250889	-1.8025		1.08279	0.288988	-0.12495	-0.14791	-1.41985
9.44156	-0.2829	2.44049	-1.09972	0.15721	2.44302		2.24378	-0.81134	-1.15371	-0.25212	-1.03406		-1.08355	-0.32058	-0.11499	0.203497	-1.80438		1.11896	0.371115	-0.13939	-0.19075	-1.39928
9.44976	-0.28205	2.97374	-1.03445	0.210072	2.28756		2.21153	-0.87468	-1.15522	-0.25026	-1.15963		-1.06136	-0.30559	0.060049	0.17074	-1.76397		1.1521	0.480652	-0.15641	-0.18926	-1.35119
9.45797	-0.27348	3.39353	-0.94874	0.192879	2.14984		2.09949	-0.88297	-1.17434	-0.27669	-1.27133		-1.07572	-0.26904	0.187843	0.140921	-1.67821		1.1601	0.62066	-0.1711	-0.08908	-1.27515
9.46617	-0.26307	3.65372	-0.86184	0.111173	2.03156		1.94592	-0.82478	-1.18879	-0.34331	-1.34657		-1.13547	-0.25309	0.242519	0.118735	-1.57521		1.13579	0.771475	-0.16692	0.117813	-1.19676
9.47429	-0.24629	3.76441	-0.77411	0.017625	1.91959		1.78829	-0.71353	-1.18216	-0.41668	-1.36962		-1.22407	-0.2899	0.225715	0.129293	-1.48505		1.07211	0.895139	-0.13934	0.394506	-1.13582
9.48249	-0.21226	3.74947	-0.67346	-0.02444	1.79241		1.65006	-0.58194	-1.15076	-0.45158	-1.33329		-1.29823	-0.36743	0.164042	0.198824	-1.42665		0.979715	0.966744	-0.09182	0.672646	-1.08855
9.4907	-0.15271	3.6393	-0.56579	0.003131	1.64519		1.53646	-0.46139	-1.10107	-0.42929	-1.2416		-1.34145	-0.42333	0.08968	0.350394	-1.39762		0.891236	0.980963	-0.04841	0.902631	-1.03985
9.4989	-0.08563	3.46848	-0.48486	0.078203	1.50087		1.43768	-0.37599	-1.04098	-0.37946	-1.13592		-1.37719	-0.40801	0.038127	0.566573	-1.38213		0.84245	0.950762	-0.03218	1.08956	-0.96825
9.5071	-0.04034	3.28452	-0.46433	0.158435	1.38788		1.34557	-0.32727	-0.96164	-0.34984	-1.06728		-1.42892	-0.32917	0.023153	0.811537	-1.36863		0.850765	0.884966	-0.04061	1.24266	-0.86004
9.51531	-0.02806	3.12825	-0.51905	0.203271	1.32218		1.26089	-0.29364	-0.85476	-0.35657	-1.07265		-1.49212	-0.24376	0.039984	1.05159	-1.34618		0.906026	0.797095	-0.06041	1.36424	-0.71731
9.52351	-0.02842	3.00866	-0.63035	0.205625	1.29992		1.18817	-0.26271	-0.72846	-0.39531	-1.13892		-1.52732	-0.20488	0.071785	1.26312	-1.31247		1.00353	0.70793	-0.07476	1.4316	-0.56071
9.53171	-0.00267	2.91129	-0.75384	0.208027	1.30399		1.12316	-0.23196	-0.60462	-0.43246	-1.20626		-1.50223	-0.22792	0.092945	1.43344	-1.27295		1.12817	0.632945	-0.08035	1.43134	-0.42684
9.53992	0.051205	2.82185	-0.86046	0.272326	1.2998		1.05814	-0.21712	-0.49748	-0.44617	-1.22483		-1.42157	-0.30932	0.087505	1.54128	-1.23831		1.2489	0.584029	-0.07923	1.39153	-0.33351
9.54812	0.110621	2.73819	-0.93494	0.405051	1.25227		0.996318	-0.23268	-0.40565	-0.42382	-1.18301		-1.31826	-0.42343	0.053753	1.59017	-1.21607		1.32519	0.558792	-0.07697	1.35461	-0.27233
9.55632	0.161601	2.67134	-0.97878	0.545183	1.16299		0.944196	-0.28046	-0.32689	-0.36002	-1.11915		-1.22724	-0.52875	0.014222	1.59348	-1.20488		1.3361	0.555908	-0.08226	1.3498	-0.2193
9.56444	0.211216	2.62473	-0.99534	0.610137	1.05944		0.901881	-0.36018	-0.25981	-0.29415	-1.08316		-1.16011	-0.58062	0.000321	1.5676	-1.19748		1.30241	0.563598	-0.1037	1.36064	-0.16834
9.57265	0.271684	2.58457	-0.98949	0.571376	0.980548		0.85865	-0.46669	-0.2067	-0.25862	-1.09319		-1.11912	-0.56332	0.019153	1.51163	-1.1878		1.2531	0.567539	-0.14663	1.35817	-0.13121
9.58085	0.324943	2.52759	-0.97644	0.468102	0.939348		0.805826	-0.58501	-0.16653	-0.26169	-1.1236		-1.10082	-0.48993	0.048126	1.41744	-1.18073		1.20684	0.550263	-0.19505	1.33774	-0.11777
9.58905	0.336751	2.44338	-0.97508	0.37069	0.920954		0.746085	-0.67492	-0.1456	-0.28101	-1.12152		-1.11156	-0.3913	0.043907	1.3057	-1.17803		1.15508	0.492937	-0.2137	1.32186	-0.14186
9.59726	0.29367	2.33454	-0.99833	0.335484	0.890203		0.68739	-0.70152	-0.14781	-0.2878	-1.07082		-1.15178	-0.29828	-0.01081	1.23016	-1.17397		1.09268	0.398775	-0.18682	1.34205	-0.20118
9.60546	0.220906	2.22294	-1.02903	0.355649	0.823759		0.645322	-0.67355	-0.16903	-0.28031	-1.00495		-1.20758	-0.22839	-0.09862	1.22287	-1.1565		1.03042	0.288796	-0.14269	1.38348	-0.25956
9.61366	0.159119	2.11779	-1.04515	0.394695	0.73739		0.623557	-0.63078	-0.20195	-0.27395	-0.97391		-1.2589	-0.20335	-0.19549	1.23997	-1.11856		0.975525	0.194285	-0.13202	1.38287	-0.2638
9.62187	0.135296	2.00484	-1.04871	0.408226	0.653744		0.626181	-0.6182	-0.23142	-0.30484	-0.99366		-1.28956	-0.22603	-0.29175	1.20603	-1.07318		0.921687	0.135717	-0.18518	1.28044	-0.2023
9.63007	0.149559	1.87464	-1.06071	0.381046	0.584702		0.646348	-0.65351	-0.24919	-0.38559	-1.03511		-1.29688	-0.27021	-0.38854	1.09457	-1.03476		0.858719	0.110896	-0.29216	1.08503	-0.12903
9.63827	0.174383	1.73346	-1.10809	0.356529	0.528786		0.660637	-0.72142	-0.25448	-0.49206	-1.0608		-1.26946	-0.30665	-0.4769	0.951336	-1.02102		0.797889	0.105344	-0.40933	0.865227	-0.11609
9.64648	0.178039	1.6164	-1.19342	0.369465	0.486804		0.647413	-0.79027	-0.25508	-0.5675	-1.05793		-1.20873	-0.32279	-0.53829	0.846112	-1.03669		0.75475	0.09842	-0.50447	0.681753	-0.18452
9.65468	0.154216	1.54603	-1.29157	0.423706	0.481391		0.595174	-0.83812	-0.26398	-0.56032	-1.03064		-1.14648	-0.33482	-0.55324	0.798625	-1.0747		0.737752	0.081824	-0.57336	0.530216	-0.27437
9.6628	0.128463	1.51599	-1.37148	0.490491	0.524254		0.514253	-0.84928	-0.28782	-0.47475	-0.97489		-1.12544	-0.34955	-0.52394	0.78507	-1.1262		0.73485	0.065056	-0.62551	0.357744	-0.31378
9.671	0.128768	1.50884	-1.40749	0.57599	0.59967		0.413996	-0.8181	-0.33239	-0.3625	-0.893		-1.1703	-0.35956	-0.47898	0.752255	-1.17575		0.727293	0.056587	-0.66078	0.174213	-0.2968
9.67921	0.155255	1.50128	-1.39312	0.722019	0.663716		0.304601	-0.76094	-0.39074	-0.28385	-0.8031		-1.25914	-0.3641	-0.44934	0.677504	-1.21665		0.719742	0.061082	-0.66263	0.057302	-0.27356
9.68741	0.190977	1.4746	-1.34356	0.945581	0.680718		0.207851	-0.70199	-0.45248	-0.24522	-0.72669		-1.34511	-0.36777	-0.44983	0.594014	-1.25046		0.721922	0.07583	-0.63147	0.079202	-0.29159
9.69561	0.211281	1.41305	-1.29188	1.2221	0.6491		0.145441	-0.67387	-0.50877	-0.21581	-0.68101		-1.38935	-0.38262	-0.46274	0.55114	-1.27996		0.728262	0.100103	-0.58413	0.214431	-0.34748
9.70382	0.212755	1.32787	-1.26254	1.48927	0.603474		0.126021	-0.69427	-0.54346	-0.16979	-0.66122		-1.38334	-0.40674	-0.46058	0.583599	-1.30091		0.71258	0.124752	-0.53576	0.331434	-0.41114
9.71202	0.205637	1.25438	-1.2635	1.71593	0.599339		0.126833	-0.74515	-0.55612	-0.10432	-0.64665		-1.35011	-0.42962	-0.42522	0.662333	-1.30938		0.655423	0.139163	-0.48813	0.324256	-0.4511
9.72022	0.194719	1.21413	-1.28435	1.9059	0.6773		0.114369	-0.78996	-0.56812	-0.0379	-0.5968		-1.31302	-0.43625	-0.35876	0.727976	-1.31741		0.573561	0.153726	-0.41787	0.182137	-0.46364
9.72843	0.18547	1.18708	-1.30895	2.04582	0.833552		0.07273	-0.80176	-0.60486	0.034817	-0.47852		-1.29838	-0.41436	-0.27627	0.742897	-1.34314		0.499037	0.183307	-0.30636	-0.02197	-0.46669
9.73663	0.190685	1.12759	-1.32924	2.12459	0.997868		0.019484	-0.78977	-0.6622	0.112933	-0.29653		-1.30908	-0.36759	-0.18895	0.711925	-1.39738		0.462239	0.239431	-0.15616	-0.18334	-0.4688
9.74483	0.235306	1.02402	-1.34598	2.17134	1.09369		-0.01706	-0.77556	-0.70629	0.197207	-0.10279		-1.31986	-0.31881	-0.12263	0.666744	-1.46416		0.467002	0.311842	0.007416	-0.25334	-0.47919
9.75295	0.323235	0.906523	-1.36766	2.26403	1.09528		-0.02358	-0.77986	-0.71103	0.302847	0.039065		-1.31146	-0.297	-0.10088	0.613145	-1.51059		0.494954	0.381631	0.146373	-0.25729	-0.51001
9.76115	0.427837	0.819957	-1.38525	2.47266	1.03059		-0.0062	-0.8143	-0.68824	0.449293	0.119272		-1.2903	-0.30474	-0.13148	0.551865	-1.51018		0.521831	0.431808	0.228936	-0.27944	-0.57649
9.76936	0.51059	0.775671	-1.37757	2.80918	0.949545		0.011547	-0.86806	-0.67927	0.642227	0.179422		-1.28938	-0.3314	-0.19648	0.496091	-1.46023		0.524747	0.465502	0.251368	-0.36605	-0.67839
9.77756	0.537973	0.743018	-1.3366	3.20061	0.877634		0.011845	-0.9237	-0.7087	0.837147	0.260695		-1.32645	-0.35825	-0.25927	0.463774	-1.38734		0.498641	0.489353	0.247077	-0.49017	-0.78597
9.78576	0.517793	0.681542	-1.27781	3.54979	0.821937		-0.01015	-0.95712	-0.76413	0.973487	0.37215		-1.39172	-0.37851	-0.30979	0.462146	-1.32869		0.452856	0.492614	0.262096	-0.60022	-0.85779
9.79397	0.489858	0.576013	-1.23598	3.80935	0.77643		-0.04311	-0.96415	-0.82325	1.04424	0.497128		-1.4498	-0.39812	-0.35723	0.475272	-1.31733		0.403348	0.476262	0.308461	-0.67192	-0.86338
9.80217	0.495866	0.45508	-1.23041	3.95752	0.733255		-0.06419	-0.96803	-0.88855	1.0952	0.629096		-1.47125	-0.42533	-0.41296	0.475581	-1.35109		0.367809	0.4468	0.354913	-0.72617	-0.81648
9.81037	0.546851	0.348172	-1.25946	3.99055	0.682792		-0.07041	-0.9924	-0.97953	1.1696	0.762694		-1.45406	-0.47866	-0.4678	0.436487	-1.3993		0.358688	0.417173	0.3656	-0.77069	-0.76712
9.81858	0.61892	0.268812	-1.31449	3.90348	0.620343		-0.07375	-1.04168	-1.08714	1.24674	0.867059		-1.41447	-0.56579	-0.50122	0.365268	-1.4259		0.378134	0.38746	0.340443	-0.78813	-0.76254
9.82678	0.677881	0.220807	-1.39054	3.7141	0.566216		-0.0925	-1.0932	-1.17084	1.27558	0.90209		-1.37376	-0.66942	-0.51155	0.277653	-1.40782		0.409398	0.3417	0.301578	-0.75576	-0.80782
9.83498	0.688293	0.193259	-1.47984	3.47784	0.540388		-0.12298	-1.12809	-1.18758	1.23063	0.847586		-1.33455	-0.74585	-0.51486	0.200251	-1.36393		0.429177	0.273758	0.271698	-0.70515	-0.8687
9.84311	0.651499	0.177827	-1.55547	3.26852	0.536744		-0.14173	-1.15402	-1.14143	1.12911	0.72863		-1.29794	-0.75967	-0.53392	0.170919	-1.33173		0.417699	0.189683	0.252436	-0.69662	-0.91306
9.85131	0.601266	0.158229	-1.59049	3.12325	0.524506		-0.13184	-1.19027	-1.07848	1.00088	0.580515		-1.27219	-0.72896	-0.58024	0.203782	-1.33506		0.376825	0.119036	0.239606	-0.76005	-0.92835
9.85951	0.585646	0.118545	-1.58353	2.9942	0.477369		-0.09091	-1.24626	-1.03733	0.864375	0.427211		-1.26497	-0.69424	-0.65412	0.282623	-1.35893		0.323262	0.087402	0.231447	-0.87076	-0.92178
9.86771	0.630383	0.055792	-1.55876	2.80838	0.411415		-0.03322	-1.30931	-1.03489	0.733267	0.277187		-1.27591	-0.68697	-0.73798	0.363282	-1.36178		0.26815	0.105767	0.216747	-0.95766	-0.89236
9.87592	0.719949	-0.01482	-1.53641	2.55525	0.358441		0.018776	-1.3535	-1.06065	0.611421	0.152944		-1.28904	-0.69267	-0.8051	0.414801	-1.3342		0.222407	0.158723	0.181219	-0.98648	-0.83904
9.88412	0.811971	-0.0708	-1.51473	2.3053	0.337774		0.039599	-1.35163	-1.10296	0.50477	0.088825		-1.29985	-0.66127	-0.82642	0.417856	-1.30269		0.182367	0.206187	0.112491	-0.97721	-0.78457
9.89232	0.868022	-0.11846	-1.48245	2.15399	0.337171		0.016087	-1.31435	-1.14844	0.416311	0.106338		-1.31202	-0.56483	-0.79651	0.367598	-1.29819		0.137834	0.218908	0.03251	-0.9685	-0.76108
9.90053	0.897672	-0.17752	-1.4308	2.11322	0.324152		-0.02742	-1.2732	-1.18519	0.357433	0.211041		-1.32996	-0.41863	-0.7445	0.306509	-1.31417		0.069793	0.193242	-0.02898	-0.98082	-0.78739
9.90873	0.926822	-0.26387	-1.3645	2.11691	0.270495		-0.05853	-1.25656	-1.21698	0.323975	0.399435		-1.34631	-0.27711	-0.70214	0.27726	-1.3161		-0.02471	0.162195	-0.06205	-1.00834	-0.83716
9.91693	0.964856	-0.37368	-1.28842	2.09143	0.173067		-0.07176	-1.26864	-1.24305	0.288021	0.69395		-1.3372	-0.19015	-0.68838	0.302847	-1.29367		-0.11619	0.152307	-0.07455	-1.04245	-0.86699
9.92514	0.997754	-0.48153	-1.2046	2.01756	0.057584		-0.09758	-1.28712	-1.25766	0.241472	1.10275		-1.30196	-0.17311	-0.70267	0.361047	-1.26655		-0.17528	0.163126	-0.08336	-1.06976	-0.85046
9.93326	1.00882	-0.56464	-1.10514	1.91687	-0.03725		-0.16534	-1.29442	-1.25481	0.186994	1.60868		-1.25664	-0.20421	-0.73239	0.416881	-1.25908		-0.19506	0.181709	-0.09253	-1.0887	-0.79417
9.94146	1.01751	-0.62773	-0.98526	1.79939	-0.07277		-0.26051	-1.28186	-1.23928	0.150623	2.17308		-1.21791	-0.24687	-0.77031	0.486044	-1.26712		-0.20611	0.211468	-0.10453	-1.10204	-0.73221
9.94966	1.05859	-0.70748	-0.85175	1.6666	-0.04677		-0.3376	-1.25204	-1.22758	0.14708	2.72711		-1.19017	-0.28201	-0.80794	0.625011	-1.26776		-0.2297	0.263751	-0.1185	-1.10267	-0.6967
9.95787	1.14274	-0.8245	-0.71593	1.52386	0.002125		-0.3707	-1.19644	-1.22996	0.169837	3.19212		-1.1765	-0.30525	-0.84629	0.871544	-1.24447		-0.25666	0.324563	-0.1277	-1.1136	-0.71234
9.96607	1.2344	-0.95699	-0.60744	1.40703	0.031048		-0.38716	-1.10344	-1.24394	0.206945	3.49637		-1.19231	-0.30485	-0.88977	1.15991	-1.19954		-0.2747	0.363035	-0.13236	-1.16204	-0.77927
9.97427	1.28266	-1.04801	-0.55988	1.34536	0.022268		-0.41421	-0.98424	-1.25885	0.226848	3.62203		-1.24187	-0.25692	-0.9339	1.38217	-1.14856		-0.28807	0.351146	-0.13686	-1.2703	-0.86754
9.98248	1.27602	-1.06035	-0.58406	1.33566	-0.00887		-0.45001	-0.84772	-1.27991	0.211213	3.6138		-1.29682	-0.15711	-0.96425	1.45785	-1.09989		-0.31132	0.293569	-0.14726	-1.43949	-0.94543
9.99068	1.23687	-1.01408	-0.6597	1.33894	-0.04289		-0.47467	-0.7098	-1.3164	0.157721	3.53392		-1.31256	-0.02905	-0.96485	1.37391	-1.06277		-0.34024	0.221027	-0.16232	-1.62859	-0.99899
9.99888	1.20665	-0.96003	-0.7317	1.30966	-0.06951		-0.47315	-0.59269	-1.36993	0.099354	3.43386		-1.27889	0.092398	-0.94426	1.16941	-1.04248		-0.36399	0.167127	-0.17941	-1.76211	-1.04211
10.0071	1.20633	-0.9328	-0.75404	1.24587	-0.09622		-0.45135	-0.50706	-1.43245	0.091198	3.33204		-1.23108	0.174486	-0.92695	0.929982	-1.04639		-0.38542	0.156749	-0.19506	-1.76165	-1.0931
10.0153	1.23388	-0.91341	-0.71729	1.15979	-0.14003		-0.43	-0.45274	-1.48857	0.13739	3.24608		-1.20688	0.209393	-0.93058	0.777901	-1.07846		-0.42018	0.191189	-0.21366	-1.61834	-1.15611
10.0234	1.26969	-0.86509	-0.65618	1.06577	-0.1976		-0.43986	-0.42213	-1.52446	0.194116	3.18575		-1.21277	0.201786	-0.95506	0.777211	-1.13364		-0.46881	0.240719	-0.24783	-1.39405	-1.21334
10.0316	1.29181	-0.77842	-0.61667	0.954784	-0.25693		-0.4909	-0.41515	-1.52923	0.216005	3.14329		-1.23306	0.16499	-0.98559	0.896263	-1.20808		-0.50809	0.261117	-0.30158	-1.19532	-1.24196
10.0398	1.29096	-0.66585	-0.61421	0.808552	-0.29768		-0.56309	-0.42461	-1.50643	0.205506	3.09373		-1.2679	0.119267	-1.01338	1.01946	-1.28745		-0.51335	0.225192	-0.36674	-1.10915	-1.24331
10.048	1.27	-0.55654	-0.6307	0.636294	-0.31118		-0.62548	-0.44446	-1.46343	0.18653	3.01684		-1.32991	0.084507	-1.03438	1.03146	-1.35566		-0.48205	0.149428	-0.41683	-1.14494	-1.23282
10.0562	1.24639	-0.46713	-0.63621	0.458579	-0.3095		-0.65859	-0.45924	-1.4137	0.180383	2.91585		-1.41462	0.077826	-1.04626	0.922349	-1.38515		-0.43962	0.066013	-0.43293	-1.23979	-1.23501
10.0644	1.23913	-0.40448	-0.62903	0.311883	-0.30423		-0.68145	-0.45112	-1.38126	0.190002	2.80068		-1.49001	0.089802	-1.05522	0.761552	-1.35073		-0.41613	-0.00177	-0.41211	-1.32026	-1.2575
10.0726	1.26533	-0.36306	-0.63234	0.214257	-0.29998		-0.71023	-0.42002	-1.37481	0.199906	2.68321		-1.5161	0.103725	-1.07111	0.638589	-1.26547		-0.42726	-0.04379	-0.36849	-1.36913	-1.29101
10.0808	1.32541	-0.32868	-0.6666	0.157947	-0.28768		-0.73042	-0.37669	-1.38412	0.1971	2.56938		-1.48532	0.099181	-1.09624	0.583349	-1.16988		-0.47258	-0.0623	-0.32617	-1.39931	-1.32049
10.089	1.38891	-0.29279	-0.72082	0.123966	-0.26159		-0.71603	-0.34048	-1.38392	0.161205	2.46495		-1.42026	0.055683	-1.11911	0.584752	-1.11734		-0.5329	-0.06493	-0.28943	-1.43474	-1.34169
10.0972	1.41782	-0.25124	-0.75328	0.077156	-0.21742		-0.66032	-0.33056	-1.35757	0.083565	2.37612		-1.36528	-0.02516	-1.13246	0.609293	-1.13936		-0.598	-0.06096	-0.25195	-1.48344	-1.36896
10.1054	1.39197	-0.2205	-0.73168	0.016685	-0.15889		-0.59096	-0.3611	-1.31494	-0.03496	2.29421		-1.35439	-0.12695	-1.13425	0.605084	-1.2248		-0.65299	-0.05303	-0.21538	-1.52664	-1.40982
10.1136	1.3387	-0.21073	-0.65696	-0.03695	-0.09492		-0.53314	-0.41284	-1.27324	-0.16254	2.2202		-1.387	-0.22108	-1.13904	0.572446	-1.32586		-0.6771	-0.0395	-0.19723	-1.55897	-1.45941
10.1218	1.30252	-0.21935	-0.55669	-0.07387	-0.03592		-0.50564	-0.43906	-1.23222	-0.24001	2.15326		-1.43614	-0.28339	-1.16401	0.547906	-1.39306		-0.65156	-0.02028	-0.21722	-1.57955	-1.49179
10.13	1.29811	-0.23766	-0.45252	-0.10709	0.008453		-0.51022	-0.40367	-1.17015	-0.2418	2.09419		-1.45859	-0.31013	-1.21342	0.573077	-1.40297		-0.57198	0.002475	-0.27093	-1.60271	-1.48374
10.1382	1.31641	-0.2566	-0.34213	-0.16004	0.04155		-0.54445	-0.30131	-1.07809	-0.18814	2.05176		-1.43301	-0.30395	-1.27755	0.646626	-1.35988		-0.47893	0.01579	-0.33722	-1.61733	-1.42675
10.1464	1.34438	-0.27902	-0.20499	-0.21494	0.066059		-0.5959	-0.17475	-0.98457	-0.13641	2.0358		-1.37293	-0.27923	-1.33112	0.713197	-1.29209		-0.42158	-0.0004	-0.38835	-1.58245	-1.3181
10.1546	1.39208	-0.3132	-0.01743	-0.21948	0.079748		-0.63893	-0.07564	-0.93521	-0.14003	2.0564		-1.29838	-0.25801	-1.35488	0.736156	-1.22277		-0.4072	-0.05696	-0.41157	-1.48747	-1.17081
10.1628	1.4641	-0.37427	0.206943	-0.12767	0.077542		-0.65941	-0.03487	-0.96799	-0.22669	2.10431		-1.22522	-0.27104	-1.35476	0.7168	-1.15822		-0.3996	-0.12939	-0.41406	-1.35779	-1.00367
10.171	1.54073	-0.46239	0.424639	0.032439	0.062335		-0.66726	-0.06141	-1.09393	-0.38943	2.16017		-1.16596	-0.32949	-1.35864	0.69264	-1.09515		-0.36319	-0.18112	-0.4047	-1.25143	-0.84165
10.1792	1.59432	-0.56295	0.591253	0.179063	0.052356		-0.69009	-0.13262	-1.29318	-0.56561	2.19881		-1.13823	-0.41103	-1.38936	0.688312	-1.03671		-0.30035	-0.19386	-0.39375	-1.20025	-0.71785
10.1874	1.60537	-0.64431	0.68523	0.241995	0.070028		-0.73171	-0.21496	-1.51864	-0.69134	2.19877		-1.15336	-0.46863	-1.44208	0.693662	-0.99484		-0.2247	-0.18341	-0.39012	-1.19679	-0.66059
10.1956	1.58204	-0.66914	0.712686	0.221414	0.118046		-0.77287	-0.27523	-1.71778	-0.72773	2.15197		-1.20899	-0.4757	-1.50598	0.681606	-0.97658		-0.13695	-0.19666	-0.39554	-1.19934	-0.68423
10.2038	1.53709	-0.64158	0.677702	0.175698	0.158411		-0.79409	-0.30101	-1.8514	-0.68571	2.04425		-1.27881	-0.45705	-1.5635	0.654224	-0.9869		-0.01145	-0.24578	-0.3971	-1.17933	-0.76963
10.2119	1.48276	-0.58926	0.585324	0.142383	0.153249		-0.79062	-0.30572	-1.9136	-0.62856	1.88093		-1.33061	-0.45531	-1.5972	0.658635	-1.01265		0.193923	-0.2984	-0.38197	-1.15328	-0.87512
10.2201	1.43298	-0.5475	0.460034	0.118093	0.109041		-0.78655	-0.30841	-1.92991	-0.61441	1.70096		-1.36087	-0.48558	-1.59484	0.7236	-1.03203		0.49293	-0.3054	-0.35128	-1.13301	-0.96065
10.2283	1.40189	-0.52902	0.3478	0.074327	0.058916		-0.79724	-0.3288	-1.92274	-0.65285	1.55629		-1.37803	-0.51394	-1.55341	0.821536	-1.03361		0.868555	-0.26046	-0.32401	-1.10358	-1.01224
10.2365	1.39547	-0.51676	0.290357	0.001704	0.041656		-0.82139	-0.36294	-1.90752	-0.70906	1.47619		-1.39147	-0.49528	-1.49872	0.871413	-1.02071		1.27956	-0.20194	-0.32332	-1.03793	-1.04326
10.2447	1.40696	-0.49853	0.286938	-0.06633	0.067444		-0.85263	-0.3942	-1.88826	-0.73504	1.45194		-1.39758	-0.42286	-1.4658	0.808957	-1.02726		1.68783	-0.15803	-0.34781	-0.9353	-1.06632
10.2529	1.41601	-0.47644	0.300866	-0.09448	0.121597		-0.88765	-0.41825	-1.87181	-0.69199	1.45005		-1.40351	-0.32978	-1.46896	0.660442	-1.08061		2.06755	-0.12848	-0.38041	-0.83539	-1.0821
10.2611	1.38791	-0.46293	0.287974	-0.06026	0.17801		-0.92306	-0.45567	-1.86401	-0.57075	1.43259		-1.42719	-0.26587	-1.48759	0.541985	-1.17263		2.43362	-0.08065	-0.39563	-0.7984	-1.08269
10.2693	1.3095	-0.44703	0.230756	0.018564	0.20902		-0.93891	-0.5302	-1.86005	-0.40533	1.38041		-1.47898	-0.24201	-1.48838	0.561603	-1.26123		2.81122	-0.00151	-0.37803	-0.86287	-1.07354
10.2775	1.20614	-0.421	0.143616	0.119983	0.197325		-0.92413	-0.63932	-1.86298	-0.25825	1.28578		-1.54514	-0.23945	-1.43761	0.683449	-1.29588		3.19235	0.090953	-0.33135	-1.00752	-1.06298
10.2858	1.1203	-0.40762	0.060356	0.224054	0.151997		-0.8829	-0.74992	-1.87679	-0.18589	1.16069		-1.57894	-0.2344	-1.31868	0.776866	-1.27144		3.52525	0.167899	-0.26027	-1.1854	-1.05297
10.294	1.08353	-0.43263	0.015208	0.305356	0.100037		-0.83137	-0.82189	-1.90678	-0.2006	1.03269		-1.55551	-0.21533	-1.14688	0.743159	-1.2209		3.73701	0.206972	-0.17787	-1.34859	-1.04433
10.3021	1.08795	-0.50183	0.00849	0.367266	0.057432		-0.7887	-0.84773	-1.94226	-0.28825	0.919497		-1.49796	-0.19476	-0.95621	0.578201	-1.17432		3.81604	0.196958	-0.09412	-1.46558	-1.03714
10.3103	1.10705	-0.58495	0.005499	0.414682	0.020128		-0.76079	-0.83963	-1.95524	-0.40786	0.823626		-1.45819	-0.18677	-0.78012	0.355626	-1.12432		3.80404	0.132753	-0.02658	-1.53739	-1.03513
10.3185	1.11666	-0.64544	-0.03592	0.44248	-0.02018		-0.74578	-0.8069	-1.93221	-0.50634	0.72824		-1.4633	-0.19359	-0.6285	0.13796	-1.04784		3.75224	0.034195	0.010603	-1.57622	-1.02832
10.3267	1.11346	-0.67185	-0.11213	0.445345	-0.06109		-0.73633	-0.75008	-1.87161	-0.55878	0.627115		-1.49714	-0.20743	-0.49644	-0.01958	-0.93952		3.67803	-0.05949	0.02341	-1.6009	-0.99389
10.3349	1.10045	-0.66976	-0.16787	0.428379	-0.08499		-0.73052	-0.66485	-1.78799	-0.56866	0.526977		-1.53443	-0.22558	-0.37443	-0.06887	-0.81018		3.56837	-0.11069	0.025471	-1.59459	-0.91324
10.3431	1.06451	-0.63904	-0.14773	0.408618	-0.08379		-0.73032	-0.56554	-1.7041	-0.57908	0.431869		-1.55199	-0.25302	-0.25653	0.020882	-0.68736		3.4417	-0.11333	0.034692	-1.53466	-0.79013
10.3513	1.01113	-0.57173	-0.0509	0.390736	-0.0583		-0.74028	-0.47543	-1.64666	-0.61498	0.343698		-1.53991	-0.28643	-0.13915	0.209976	-0.59483		3.34641	-0.09229	0.047909	-1.43801	-0.66219
10.3595	0.95853	-0.47724	0.061534	0.366516	-0.00724		-0.76545	-0.42213	-1.63027	-0.66329	0.259549		-1.50376	-0.3183	-0.01026	0.384113	-0.54304		3.31941	-0.07303	0.052251	-1.34971	-0.55844
10.3677	0.921372	-0.38173	0.143731	0.315557	0.072539		-0.79987	-0.41879	-1.64368	-0.69188	0.190858		-1.45342	-0.34292	0.131704	0.445274	-0.52774		3.33924	-0.06804	0.045363	-1.30821	-0.48659
10.3759	0.89182	-0.3211	0.189531	0.247049	0.17964		-0.83314	-0.4523	-1.6602	-0.67939	0.137181		-1.41495	-0.37217	0.277213	0.366802	-0.53958		3.3417	-0.08079	0.036765	-1.31122	-0.4273
10.3841	0.854286	-0.30941	0.216499	0.182808	0.297071		-0.84931	-0.49751	-1.65493	-0.65206	0.088355		-1.41538	-0.42143	0.420984	0.200191	-0.5718		3.29696	-0.12302	0.034375	-1.3332	-0.34099
10.3922	0.808814	-0.32866	0.235479	0.129792	0.419631		-0.84675	-0.53113	-1.63201	-0.63289	0.030809		-1.46279	-0.493	0.564011	0.039204	-0.62708		3.22166	-0.19304	0.025887	-1.34698	-0.20268
10.4004	0.771806	-0.35802	0.237237	0.089046	0.54492		-0.82792	-0.55767	-1.6144	-0.63101	-0.04638		-1.52974	-0.56541	0.715196	-0.03407	-0.7103		3.15838	-0.25899	0.001232	-1.33496	-0.02078
10.4086	0.763011	-0.38385	0.223178	0.079629	0.675802		-0.7979	-0.58764	-1.6195	-0.64208	-0.13803		-1.57653	-0.61174	0.864517	0.018718	-0.79111		3.12059	-0.28845	-0.03928	-1.29376	0.152977
10.4168	0.777281	-0.42011	0.200325	0.134049	0.812707		-0.7727	-0.6172	-1.64118	-0.65231	-0.22837		-1.5843	-0.63696	0.980888	0.165699	-0.84383		3.09662	-0.26392	-0.07836	-1.23068	0.272139
10.425	0.791713	-0.48624	0.172595	0.235468	0.944629		-0.7589	-0.63865	-1.65446	-0.65542	-0.29796		-1.56226	-0.65374	1.04849	0.342975	-0.87744		3.07134	-0.20101	-0.10525	-1.17563	0.329429
10.4332	0.793889	-0.58141	0.133474	0.337886	1.07307		-0.76101	-0.64487	-1.64492	-0.63574	-0.33781		-1.53634	-0.67396	1.07743	0.493094	-0.91128		3.04596	-0.12685	-0.1214	-1.15175	0.353933
10.4414	0.787621	-0.67012	0.084891	0.402875	1.20083		-0.78008	-0.64264	-1.61625	-0.58252	-0.36004		-1.52024	-0.69719	1.11094	0.589021	-0.94776		3.02994	-0.06504	-0.12764	-1.14569	0.372595
10.4496	0.781373	-0.70217	0.051359	0.420603	1.33478		-0.81438	-0.64426	-1.59707	-0.49342	-0.39138		-1.51967	-0.71335	1.18683	0.615761	-0.94711		3.01217	-0.03783	-0.11975	-1.11759	0.37144
10.4579	0.777982	-0.66403	0.050159	0.421447	1.46599		-0.85682	-0.65633	-1.61021	-0.37289	-0.4539		-1.53524	-0.7113	1.31021	0.563363	-0.87257		2.978	-0.05554	-0.09452	-1.04724	0.315118
10.466	0.778898	-0.58054	0.074935	0.420757	1.57178		-0.88471	-0.67578	-1.64784	-0.23655	-0.54261		-1.56726	-0.68048	1.45244	0.464999	-0.73468		2.91604	-0.09927	-0.07288	-0.95776	0.183919
10.4742	0.783386	-0.50851	0.099005	0.41794	1.62921		-0.88546	-0.70526	-1.68499	-0.12116	-0.62855		-1.60768	-0.63626	1.58317	0.365375	-0.59332		2.83305	-0.12927	-0.08333	-0.87198	1.96e-05
10.4824	0.784523	-0.484	0.097077	0.407203	1.61731		-0.85697	-0.74874	-1.69896	-0.06903	-0.6877		-1.62823	-0.59686	1.68604	0.303121	-0.51298		2.75152	-0.11935	-0.12992	-0.81206	-0.19425
10.4906	0.767168	-0.49026	0.058257	0.384399	1.54251		-0.8152	-0.79597	-1.69545	-0.0677	-0.72043		-1.61672	-0.57078	1.73795	0.271815	-0.4983		2.68089	-0.08555	-0.19312	-0.77944	-0.37048
10.4988	0.720612	-0.49811	-0.00915	0.349383	1.43731		-0.77656	-0.83645	-1.69166	-0.06313	-0.7346		-1.59112	-0.56123	1.71333	0.230498	-0.51151		2.61934	-0.0589	-0.24786	-0.76559	-0.50658
10.507	0.663885	-0.4982	-0.08442	0.297473	1.34625		-0.74459	-0.86051	-1.69637	-0.00791	-0.73024		-1.58755	-0.56065	1.60251	0.13154	-0.49843		2.55023	-0.05864	-0.28347	-0.75554	-0.60504
10.5152	0.615036	-0.50955	-0.15235	0.253707	1.29837		-0.72388	-0.86908	-1.70182	0.090663	-0.7135		-1.62069	-0.57227	1.43513	-0.06107	-0.43301		2.46372	-0.07215	-0.30165	-0.73861	-0.66738
10.5234	0.574215	-0.55269	-0.19624	0.248499	1.28619		-0.71354	-0.87265	-1.69125	0.182773	-0.68766		-1.66764	-0.60567	1.26961	-0.32009	-0.33418		2.35874	-0.08476	-0.30006	-0.7401	-0.69979
10.5316	0.524125	-0.62708	-0.21024	0.293858	1.28248		-0.7071	-0.88932	-1.66626	0.24341	-0.66222		-1.70038	-0.66397	1.15817	-0.56322	-0.24035		2.24308	-0.10238	-0.27775	-0.77031	-0.70925
10.5398	0.454583	-0.70799	-0.20518	0.365399	1.26191		-0.69862	-0.93007	-1.63657	0.275049	-0.64468		-1.69603	-0.73118	1.11283	-0.71281	-0.17892		2.13929	-0.12835	-0.23825	-0.82192	-0.70865
10.548	0.38156	-0.77051	-0.20048	0.412339	1.21763		-0.69	-0.97457	-1.60799	0.306366	-0.63888		-1.65714	-0.78734	1.09356	-0.75058	-0.14842		2.05679	-0.15412	-0.19919	-0.87978	-0.71885
10.5562	0.324696	-0.80728	-0.20818	0.395028	1.16383		-0.68373	-0.99886	-1.57992	0.331596	-0.65774		-1.60114	-0.82409	1.0534	-0.73194	-0.13865		2.00371	-0.15896	-0.17253	-0.93491	-0.74343
10.5644	0.295034	-0.81975	-0.2156	0.292788	1.12292		-0.67438	-0.98495	-1.54876	0.318886	-0.70809		-1.53209	-0.83218	0.965366	-0.71454	-0.14237		1.982	-0.13939	-0.15806	-1.00246	-0.77886
10.5725	0.288714	-0.81671	-0.19871	0.127319	1.11016		-0.64792	-0.94127	-1.51446	0.261281	-0.78086		-1.44861	-0.81398	0.845554	-0.72302	-0.1564		1.9744	-0.10507	-0.15894	-1.07162	-0.81321
10.5807	0.305341	-0.7897	-0.13159	-0.05593	1.12289		-0.59235	-0.89641	-1.47737	0.188432	-0.84555		-1.35938	-0.78953	0.728126	-0.7496	-0.17303		1.96122	-0.07869	-0.17555	-1.106	-0.83613
10.5889	0.351443	-0.72474	-0.01417	-0.18596	1.15438		-0.52163	-0.8665	-1.43982	0.162108	-0.8756		-1.28969	-0.78705	0.624714	-0.78962	-0.19366		1.92697	-0.08239	-0.20107	-1.06883	-0.84311
10.5971	0.409092	-0.62833	0.123694	-0.21745	1.18981		-0.44886	-0.85397	-1.4142	0.231295	-0.87542		-1.25656	-0.80643	0.534254	-0.8326	-0.24197		1.86676	-0.12204	-0.22428	-0.983	-0.83841
10.6053	0.446159	-0.53105	0.250382	-0.1513	1.21923		-0.3651	-0.8477	-1.40998	0.404647	-0.86857		-1.25683	-0.82056	0.451377	-0.85137	-0.33304		1.78394	-0.19072	-0.24236	-0.91586	-0.83916
10.6135	0.438281	-0.46968	0.338003	-0.02073	1.23265		-0.24764	-0.84065	-1.41023	0.613858	-0.87666		-1.27139	-0.80861	0.390882	-0.82982	-0.4479		1.69743	-0.25713	-0.25961	-0.9033	-0.85732
10.6218	0.386587	-0.44056	0.372297	0.107023	1.22027		-0.06537	-0.83608	-1.37606	0.745406	-0.89436		-1.28843	-0.76655	0.361196	-0.78713	-0.53245		1.62832	-0.29126	-0.27665	-0.93422	-0.89529
10.6299	0.311362	-0.41909	0.353827	0.187386	1.18447		0.200174	-0.84052	-1.29787	0.746964	-0.91041		-1.3186	-0.71395	0.346091	-0.7642	-0.55064		1.58555	-0.27021	-0.28676	-0.96807	-0.94383
10.6381	0.237884	-0.38699	0.298943	0.198241	1.13249		0.555905	-0.85364	-1.20731	0.657018	-0.9313		-1.36608	-0.65941	0.318629	-0.76874	-0.5232		1.56049	-0.18908	-0.2793	-0.99954	-0.9857
10.6464	0.184612	-0.35463	0.236317	0.138769	1.08302		0.977463	-0.83945	-1.15519	0.564278	-0.97455		-1.40614	-0.59983	0.269613	-0.79421	-0.4887		1.52649	-0.07087	-0.26344	-1.03274	-1.00661
10.6546	0.154287	-0.36224	0.185926	0.038229	1.04825		1.40848	-0.76401	-1.1569	0.526374	-1.04747		-1.40129	-0.54137	0.224109	-0.84034	-0.46811		1.46938	0.056897	-0.25763	-1.06667	-1.00565
10.6627	0.139375	-0.42598	0.149561	-0.06738	1.02183		1.80116	-0.63558	-1.18122	0.529358	-1.13041		-1.35974	-0.50631	0.210132	-0.9037	-0.44732		1.39435	0.162591	-0.27847	-1.09427	-0.99094
10.6709	0.124391	-0.52056	0.111634	-0.12606	0.98891		2.10978	-0.50262	-1.19924	0.528692	-1.18787		-1.32905	-0.52807	0.230361	-0.96478	-0.41541		1.32598	0.238923	-0.32615	-1.10789	-0.96531
10.6791	0.100177	-0.59168	0.055802	-0.09741	0.937049		2.3317	-0.41288	-1.20872	0.506851	-1.19124		-1.34174	-0.6092	0.258463	-0.9748	-0.38246		1.28246	0.299755	-0.38688	-1.11216	-0.93512
10.6873	0.071918	-0.59812	-0.02044	0.020942	0.866297		2.48136	-0.37597	-1.22264	0.474463	-1.14913		-1.38372	-0.71901	0.264041	-0.92511	-0.35686		1.25177	0.360164	-0.44368	-1.10691	-0.91264
10.6955	0.049698	-0.55048	-0.11041	0.171894	0.773044		2.57407	-0.36906	-1.23107	0.425061	-1.08873		-1.40076	-0.80609	0.23218	-0.86985	-0.33721		1.21437	0.418553	-0.47245	-1.10675	-0.89994
10.7037	0.040443	-0.49488	-0.20418	0.26411	0.655348		2.62673	-0.35537	-1.21806	0.350132	-1.03413		-1.35954	-0.82342	0.175948	-0.88501	-0.30944		1.15461	0.46368	-0.46874	-1.11988	-0.88904
10.7119	0.03904	-0.48092	-0.29241	0.273265	0.522929		2.6564	-0.32213	-1.18641	0.24234	-1.00685		-1.27787	-0.76972	0.121223	-0.99212	-0.26469		1.09268	0.503724	-0.44485	-1.13677	-0.86788
10.7201	0.053271	-0.5186	-0.36006	0.248547	0.401092		2.68008	-0.27479	-1.15747	0.123336	-1.01485		-1.20202	-0.68557	0.078179	-1.10825	-0.20114		1.06922	0.551201	-0.42213	-1.14806	-0.847
10.7283	0.088038	-0.583	-0.40285	0.264348	0.31795		2.69922	-0.22825	-1.14802	0.059084	-1.05858		-1.16793	-0.62867	0.045694	-1.13671	-0.11736		1.10917	0.598605	-0.4186	-1.14836	-0.83942
10.7365	0.129515	-0.64789	-0.42027	0.342915	0.281964		2.71773	-0.19809	-1.13753	0.111708	-1.11131		-1.17593	-0.62825	0.019339	-1.03893	-0.02141		1.19983	0.609484	-0.43473	-1.16607	-0.84035
10.7447	0.158035	-0.69306	-0.41701	0.446166	0.277704		2.746	-0.17949	-1.10413	0.289435	-1.1345		-1.21129	-0.67165	-0.00056	-0.8678	0.076813		1.2871	0.554237	-0.47011	-1.22677	-0.82322
10.7529	0.152839	-0.71538	-0.40521	0.528098	0.280381		2.7869	-0.14992	-1.05542	0.503748	-1.10605		-1.24385	-0.72247	-0.00349	-0.72231	0.169788		1.33541	0.443202	-0.51625	-1.31077	-0.76462
10.761	0.118539	-0.72336	-0.39627	0.561175	0.275948		2.81707	-0.0746	-1.02199	0.65099	-1.03633		-1.24253	-0.74924	0.005986	-0.66248	0.2653		1.33671	0.322483	-0.56631	-1.37428	-0.6808
10.7692	0.07462	-0.73526	-0.40759	0.564195	0.251372		2.80165	0.04998	-1.02681	0.701533	-0.96672		-1.19821	-0.74689	0.011268	-0.69909	0.380425		1.29823	0.244184	-0.61344	-1.39012	-0.59757
10.7774	0.052537	-0.74791	-0.43843	0.571305	0.20346		2.73055	0.187308	-1.06587	0.699869	-0.92399		-1.13682	-0.72731	-0.0106	-0.79051	0.534392		1.22889	0.225991	-0.6474	-1.38507	-0.52709
10.7857	0.084226	-0.7371	-0.4744	0.614798	0.146107		2.6216	0.287199	-1.11813	0.70233	-0.91005		-1.10971	-0.72109	-0.07577	-0.87487	0.737569		1.1329	0.251882	-0.66981	-1.38224	-0.46011
10.7939	0.171681	-0.68462	-0.4986	0.680702	0.089475		2.51271	0.306191	-1.17045	0.711532	-0.91153		-1.15032	-0.74755	-0.18197	-0.90564	0.975075		1.02465	0.283238	-0.68195	-1.38153	-0.39329
10.802	0.287149	-0.61097	-0.50308	0.718262	0.048255		2.42897	0.247931	-1.2261	0.736596	-0.91308		-1.2388	-0.79559	-0.30349	-0.8694	1.2066		0.923215	0.294091	-0.68535	-1.38995	-0.34919
10.8103	0.378559	-0.56501	-0.49599	0.694376	0.0388		2.38136	0.152803	-1.28029	0.82332	-0.90901		-1.31557	-0.83483	-0.39092	-0.78918	1.36768		0.84688	0.285298	-0.68745	-1.42575	-0.34132
10.8185	0.410911	-0.56075	-0.47606	0.630504	0.078734		2.37735	0.070562	-1.31519	0.992403	-0.88599		-1.33495	-0.84688	-0.40224	-0.69878	1.42083		0.799672	0.260331	-0.70653	-1.49465	-0.36177
10.8267	0.392758	-0.56864	-0.44371	0.593622	0.167919		2.40186	0.018764	-1.31363	1.18473	-0.83735		-1.2976	-0.84978	-0.33474	-0.6384	1.37769		0.779143	0.221925	-0.7533	-1.56375	-0.38754
10.8349	0.357639	-0.54167	-0.40574	0.586464	0.269786		2.41567	-0.02756	-1.27717	1.29572	-0.76997		-1.23571	-0.85558	-0.23279	-0.62173	1.28204		0.781903	0.167939	-0.82093	-1.5999	-0.40235
10.8431	0.33946	-0.47128	-0.36934	0.548073	0.343744		2.37118	-0.09472	-1.23672	1.30616	-0.69833		-1.19124	-0.85455	-0.16142	-0.64681	1.17878		0.795964	0.098776	-0.88739	-1.60248	-0.40379
10.8512	0.346279	-0.39575	-0.33201	0.438972	0.367942		2.25305	-0.1814	-1.21556	1.29721	-0.63156		-1.18376	-0.82175	-0.14684	-0.69547	1.08501		0.801809	0.033139	-0.92961	-1.59771	-0.39132
10.8594	0.367109	-0.35118	-0.28135	0.293823	0.355817		2.08647	-0.2637	-1.20946	1.34197	-0.57294		-1.21298	-0.7583	-0.16554	-0.7564	1.00459		0.776312	-0.01231	-0.94994	-1.59124	-0.3676
10.8676	0.378189	-0.35388	-0.21836	0.208728	0.324953		1.91366	-0.32828	-1.19167	1.41287	-0.52684		-1.26326	-0.70768	-0.17662	-0.83975	0.9417		0.707938	-0.03655	-0.9699	-1.55198	-0.33479
10.8758	0.370083	-0.38392	-0.15828	0.221081	0.262815		1.77224	-0.37542	-1.13677	1.42248	-0.49661		-1.31644	-0.70125	-0.16143	-0.94217	0.899977		0.599787	-0.05362	-1.00469	-1.47238	-0.30012
10.884	0.355489	-0.41375	-0.11744	0.282694	0.158749		1.66503	-0.40562	-1.04816	1.327	-0.49302		-1.36339	-0.72939	-0.12241	-1.04102	0.884485		0.487545	-0.06976	-1.04829	-1.38072	-0.26422
10.8922	0.357782	-0.437	-0.09139	0.307662	0.029861		1.58125	-0.41385	-0.9459	1.15036	-0.51647		-1.39485	-0.75819	-0.06761	-1.07539	0.895352		0.423537	-0.07619	-1.07513	-1.31649	-0.23491
10.9004	0.388003	-0.45874	-0.05946	0.256002	-0.07328		1.5199	-0.40014	-0.85774	0.967922	-0.56277		-1.41327	-0.75828	0.000206	-1.02344	0.931423		0.418563	-0.06221	-1.06776	-1.27212	-0.22074
10.9086	0.427753	-0.49008	-0.00836	0.172762	-0.10974		1.48047	-0.38315	-0.80205	0.842474	-0.62092		-1.42202	-0.70954	0.07996	-0.93234	0.973716		0.442184	-0.00338	-1.02615	-1.23291	-0.21151
10.9168	0.448134	-0.53197	0.048992	0.112754	-0.05388		1.45364	-0.37955	-0.7841	0.804439	-0.66361		-1.43076	-0.58508	0.157829	-0.87105	0.999266		0.443883	0.109622	-0.97428	-1.21357	-0.18296
10.925	0.427779	-0.57982	0.079456	0.102814	0.094053		1.41883	-0.39619	-0.79717	0.833545	-0.6732		-1.44268	-0.38182	0.215195	-0.88812	0.999491		0.404756	0.260609	-0.93555	-1.22772	-0.10484
10.9332	0.369934	-0.61659	0.06224	0.115976	0.319414		1.35566	-0.42505	-0.81309	0.891602	-0.64937		-1.44326	-0.13794	0.229123	-0.95978	0.984232		0.344817	0.408803	-0.90962	-1.27246	0.021964
10.9413	0.298924	-0.63059	-0.00435	0.109235	0.609503		1.26303	-0.45838	-0.80622	0.953001	-0.61994		-1.42559	0.07873	0.189103	-1.0311	0.968555		0.29013	0.509493	-0.88702	-1.32902	0.160633
10.9495	0.245172	-0.61804	-0.10027	0.063852	0.941985		1.17125	-0.50207	-0.77117	0.988575	-0.60663		-1.38452	0.218524	0.109525	-1.05987	0.949777		0.252758	0.548494	-0.85826	-1.40469	0.282018
10.9578	0.244184	-0.58043	-0.19576	0.004035	1.27514		1.10808	-0.54784	-0.7233	0.980728	-0.59914		-1.32127	0.288651	0.018188	-1.03892	0.92269		0.222258	0.545675	-0.82696	-1.52179	0.392125
10.9659	0.310011	-0.53009	-0.26908	-0.02486	1.54561		1.06305	-0.58203	-0.68429	0.911767	-0.57102		-1.23413	0.326314	-0.04573	-0.99284	0.896432		0.190527	0.530486	-0.80779	-1.66032	0.525785
10.9741	0.431266	-0.48282	-0.30505	-0.01325	1.70099		1.00207	-0.5906	-0.65592	0.795854	-0.49887		-1.12334	0.360236	-0.06712	-0.94467	0.890488		0.15508	0.505493	-0.80741	-1.7688	0.684538
10.9824	0.569337	-0.45056	-0.30872	-0.00076	1.73785		0.902258	-0.57457	-0.6286	0.695743	-0.39514		-1.00738	0.38763	-0.06144	-0.89903	0.900295		0.112083	0.463383	-0.81978	-1.78702	0.830591
10.9906	0.674205	-0.42751	-0.3001	-0.0491	1.70355		0.783555	-0.55538	-0.59257	0.657077	-0.29085		-0.92049	0.398891	-0.0567	-0.84182	0.894219		0.069099	0.400386	-0.8267	-1.71227	0.929611
10.9988	0.723372	-0.40359	-0.30052	-0.16008	1.65996		0.678583	-0.54681	-0.55258	0.67641	-0.20917		-0.89031	0.388265	-0.06878	-0.76915	0.844173		0.045273	0.323368	-0.81737	-1.58811	0.995001
11.007	0.71817	-0.37875	-0.32108	-0.25962	1.63672		0.598279	-0.54919	-0.51837	0.69837	-0.15842		-0.91165	0.35578	-0.08107	-0.69758	0.740451		0.059589	0.2514	-0.7923	-1.46342	1.08568
11.0152	0.675134	-0.36273	-0.35354	-0.27145	1.63343		0.522885	-0.54482	-0.50224	0.67452	-0.11985		-0.96004	0.310648	-0.07486	-0.63711	0.603891		0.108183	0.195255	-0.76299	-1.3842	1.24153
11.0234	0.611652	-0.3729	-0.38542	-0.1905	1.63527		0.436248	-0.52485	-0.51145	0.602587	-0.07185		-1.01069	0.262533	-0.0445	-0.56566	0.453807		0.167521	0.165225	-0.74453	-1.37371	1.44769
11.0315	0.545604	-0.38692	-0.39568	-0.1093	1.62216		0.359711	-0.5041	-0.53593	0.511642	-0.00374		-1.04354	0.21471	-0.01234	-0.43307	0.307626		0.209195	0.15463	-0.7468	-1.41564	1.64872
11.0397	0.487416	-0.36492	-0.36005	-0.11262	1.58238		0.328256	-0.50092	-0.55297	0.4489	0.068636		-1.04441	0.158659	-0.0141	-0.20909	0.181065		0.217779	0.154736	-0.76773	-1.45989	1.80075
11.0479	0.438054	-0.29983	-0.26726	-0.19581	1.50384		0.358185	-0.52425	-0.5366	0.432992	0.111042		-1.01572	0.099291	-0.06314	0.089605	0.08438		0.192296	0.155851	-0.78758	-1.47216	1.87823
11.0561	0.397642	-0.22827	-0.13421	-0.27713	1.3987		0.427103	-0.55571	-0.48718	0.459494	0.098672		-0.98349	0.052153	-0.1379	0.396181	0.02301		0.137381	0.13944	-0.79314	-1.44857	1.88021
11.0643	0.358431	-0.20498	-0.00523	-0.26188	1.30235		0.490215	-0.57762	-0.42235	0.495853	0.039555		-0.97282	0.007911	-0.20284	0.648648	-0.01027		0.070253	0.098433	-0.78651	-1.4045	1.81682
11.0725	0.314934	-0.24404	0.084299	-0.13571	1.25815		0.516078	-0.59775	-0.35516	0.507148	-0.02159		-0.98805	-0.04693	-0.23955	0.831571	-0.01293		0.01035	0.031983	-0.78836	-1.35585	1.70685
11.0807	0.267833	-0.31885	0.131562	0.034425	1.29928		0.485246	-0.64098	-0.28959	0.477245	-0.04663		-1.01125	-0.11483	-0.26376	0.910864	0.023905		-0.01869	-0.04237	-0.80701	-1.30234	1.59104
11.0889	0.233585	-0.38549	0.161933	0.149446	1.43126		0.408326	-0.71192	-0.21552	0.418201	-0.04008		-1.02617	-0.16359	-0.29975	0.860511	0.095339		-0.01102	-0.10788	-0.82493	-1.25241	1.5042
11.0971	0.23163	-0.41637	0.203738	0.19106	1.65194		0.322085	-0.77818	-0.12974	0.369762	-0.0528		-1.04279	-0.15814	-0.352	0.668682	0.203421		0.012558	-0.1434	-0.83225	-1.21146	1.45422
11.1053	0.263754	-0.41658	0.264282	0.242435	1.93548		0.269411	-0.81048	-0.02947	0.347053	-0.12651		-1.06575	-0.10285	-0.40421	0.369239	0.3563		0.031686	-0.14124	-0.83237	-1.17563	1.41894
11.1135	0.30818	-0.39217	0.327418	0.382128	2.24639		0.265904	-0.80992	0.084168	0.328279	-0.25028		-1.0929	-0.04214	-0.44231	0.039288	0.567349		0.028466	-0.11651	-0.84014	-1.12763	1.36574
11.1217	0.322722	-0.35847	0.365936	0.627472	2.54518		0.280368	-0.80553	0.203135	0.279317	-0.3714		-1.11858	-0.02776	-0.46028	-0.24754	0.824951		0.012522	-0.08155	-0.85324	-1.05621	1.2822
11.1298	0.287155	-0.33123	0.369075	0.932764	2.78712		0.27829	-0.80823	0.314619	0.207075	-0.43687		-1.14386	-0.06351	-0.46036	-0.44256	1.09043		0.00955	-0.03744	-0.85623	-0.96945	1.17041
11.138	0.217659	-0.31893	0.336409	1.23418	2.93333		0.245269	-0.80346	0.397835	0.165652	-0.44736		-1.17749	-0.12477	-0.44328	-0.54658	1.30939		0.036123	0.028359	-0.84379	-0.85758	1.04144
11.1463	0.151312	-0.32659	0.279673	1.53241	2.96929		0.191653	-0.78596	0.445207	0.187255	-0.43783		-1.21084	-0.1867	-0.41501	-0.56753	1.44404		0.088171	0.11493	-0.82837	-0.71777	0.908827
11.1545	0.116831	-0.3575	0.209886	1.8695	2.9174		0.128846	-0.76405	0.463595	0.263968	-0.43078		-1.22634	-0.23136	-0.38816	-0.51883	1.49133		0.133404	0.201269	-0.83911	-0.55477	0.783174
11.1627	0.102795	-0.41247	0.133255	2.24372	2.81837		0.067696	-0.73309	0.468368	0.339241	-0.42362		-1.20845	-0.25261	-0.36361	-0.4449	1.46715		0.143297	0.264853	-0.88326	-0.39271	0.678176
11.1709	0.092046	-0.47832	0.065462	2.57803	2.70988		0.015528	-0.62238	0.483567	0.371486	-0.40306		-1.16281	-0.25089	-0.33578	-0.39781	1.40218		0.112486	0.294573	-0.944	-0.26099	0.593151
11.1791	0.074262	-0.53425	0.016068	2.7813	2.60852		-0.0236	-0.33661	0.532473	0.364864	-0.37545		-1.12458	-0.23506	-0.30253	-0.41238	1.32961		0.064118	0.296738	-0.99516	-0.15821	0.522525
11.1873	0.050835	-0.55838	-0.01346	2.80021	2.51484		-0.04191	0.160541	0.616413	0.337458	-0.35498		-1.12714	-0.21971	-0.27692	-0.47375	1.26066		0.030235	0.283832	-1.01889	-0.08504	0.45924
11.1955	0.033363	-0.55379	-0.03614	2.647	2.4316		-0.04002	0.810111	0.706445	0.32684	-0.35546		-1.17384	-0.2282	-0.28113	-0.53431	1.18008		0.019797	0.275798	-1.02034	-0.0483	0.395227
11.2037	0.026199	-0.53503	-0.06082	2.38289	2.34922		-0.02933	1.47965	0.772211	0.341655	-0.37845		-1.22372	-0.27024	-0.32095	-0.56727	1.06349		0.027079	0.279726	-1.01118	-0.04283	0.323405
11.2118	0.030064	-0.51194	-0.07919	2.08915	2.25074		-0.03928	2.04221	0.800938	0.358705	-0.40278		-1.23532	-0.3297	-0.38417	-0.59484	0.9167		0.037198	0.286974	-1.00427	-0.04272	0.234012
11.22	0.037189	-0.50123	-0.0864	1.83339	2.12435		-0.09508	2.43838	0.803562	0.332762	-0.40848		-1.2064	-0.37438	-0.43785	-0.64803	0.761767		0.034212	0.295622	-1.00873	-0.00831	0.136141
11.2282	0.046672	-0.50942	-0.08164	1.6517	1.98822		-0.18529	2.6452	0.801212	0.243731	-0.37862		-1.16812	-0.37711	-0.46114	-0.70575	0.632919		0.009911	0.30829	-1.0332	0.077445	0.03982
11.2364	0.06224	-0.53576	-0.08251	1.54881	1.88848		-0.26603	2.68954	0.805634	0.126582	-0.31639		-1.15767	-0.34547	-0.46343	-0.72182	0.542389		-0.03052	0.340861	-1.06914	0.184055	-0.04157
11.2446	0.081621	-0.56269	-0.10697	1.48466	1.84235		-0.2927	2.62217	0.820181	0.046517	-0.25175		-1.17425	-0.30553	-0.46508	-0.6912	0.479562		-0.07284	0.393276	-1.10209	0.24313	-0.10654
11.2528	0.099275	-0.57044	-0.15522	1.42285	1.81999		-0.27432	2.49893	0.832339	0.045423	-0.22561		-1.19978	-0.28052	-0.48051	-0.6827	0.433903		-0.11151	0.432845	-1.12115	0.222401	-0.15579
11.261	0.106594	-0.56058	-0.21434	1.36392	1.76867		-0.25212	2.35263	0.835796	0.105192	-0.25887		-1.22225	-0.27905	-0.49858	-0.74614	0.38784		-0.14827	0.433842	-1.1144	0.143859	-0.18266
11.2692	0.093936	-0.54999	-0.26515	1.32895	1.67815		-0.24927	2.20848	0.828503	0.189383	-0.33389		-1.24531	-0.29386	-0.50346	-0.83885	0.340564		-0.1906	0.408631	-1.08474	0.063262	-0.18459
11.2774	0.0529	-0.56533	-0.30221	1.35061	1.58079		-0.26719	2.08686	0.804845	0.280245	-0.40822		-1.26243	-0.32011	-0.49715	-0.87735	0.30927		-0.23587	0.389117	-1.04275	0.014741	-0.16841
11.2856	-0.00889	-0.60532	-0.33688	1.40833	1.51641		-0.2892	1.9963	0.760245	0.368098	-0.43813		-1.26656	-0.33262	-0.50518	-0.82926	0.309641		-0.28194	0.370039	-1.00826	-0.03136	-0.15794
11.2938	-0.0726	-0.65072	-0.38436	1.43783	1.49699		-0.30288	1.92527	0.688025	0.440482	-0.41585		-1.27477	-0.29653	-0.54441	-0.75956	0.339769		-0.32531	0.310304	-1.00027	-0.13409	-0.17792
11.302	-0.11309	-0.68554	-0.43103	1.36774	1.49907		-0.30538	1.85186	0.596814	0.482192	-0.36078		-1.3049	-0.18113	-0.60161	-0.74304	0.371699		-0.36055	0.192621	-1.02148	-0.3139	-0.24701
11.3102	-0.11183	-0.69861	-0.44875	1.17963	1.4946		-0.3079	1.76517	0.504058	0.489849	-0.30424		-1.35909	0.021418	-0.65242	-0.8061	0.38613		-0.39441	0.05697	-1.05679	-0.5067	-0.36762
11.3184	-0.07629	-0.69141	-0.42417	0.925167	1.46888		-0.33715	1.65857	0.422891	0.466022	-0.2684		-1.41234	0.277754	-0.67911	-0.93293	0.387131		-0.42743	-0.02382	-1.08243	-0.63057	-0.52156
11.3266	-0.02992	-0.66931	-0.3749	0.677445	1.42222		-0.40355	1.53316	0.348019	0.430341	-0.25124		-1.43387	0.540654	-0.68137	-1.08651	0.391974		-0.46625	-0.02868	-1.09561	-0.66159	-0.67133
11.3348	0.001401	-0.64215	-0.33411	0.46897	1.37348		-0.48331	1.38505	0.267383	0.409486	-0.2392		-1.42502	0.750268	-0.66526	-1.22501	0.418412		-0.51751	-0.00602	-1.10734	-0.62813	-0.77722
11.343	0.009962	-0.61356	-0.31534	0.284061	1.34576		-0.53043	1.21992	0.188506	0.413433	-0.20906		-1.40656	0.88007	-0.64063	-1.28488	0.479622		-0.58111	-0.01057	-1.11472	-0.59701	-0.83851
11.3512	-0.00209	-0.5857	-0.32074	0.107986	1.34583		-0.53175	1.06656	0.129584	0.453811	-0.15225		-1.39467	0.941021	-0.61877	-1.23768	0.587671		-0.65721	-0.05277	-1.10774	-0.6076	-0.88645
11.3594	-0.03955	-0.57204	-0.35333	-0.02507	1.35564		-0.51552	0.947527	0.102714	0.516981	-0.07811		-1.37706	0.965352	-0.60044	-1.14902	0.728061		-0.72697	-0.1001	-1.07897	-0.66645	-0.93842
11.3676	-0.08815	-0.584	-0.41197	-0.06053	1.35783		-0.5195	0.86945	0.103668	0.573873	-0.00131		-1.34697	0.998895	-0.58583	-1.12281	0.855179		-0.75622	-0.1161	-1.03867	-0.75954	-0.98165
[truncated: 2,883 more rows]
