# Supplementary material for: Functionally refined encoding of threat memory by distinct populations of basal forebrain cholinergic projection neurons
Source: eLife. 2024 Feb 16;13:e86581. doi: 10.7554/eLife.86581 (PMC10928508; doi:10.7554/eLife.86581)
Supplement: Figure 1—figure supplement 3—source data 1. [file elife-86581-fig1-figsupp3-data1.xlsx]

## Sheet: Tone Only training
Time(s)	Day1 (shock alone)	Day1 (shock alone)	Day1 (shock alone)	Day1 (shock alone)	Day1 (shock alone)		Day2 (tone alone)	Day2 (tone alone)	Day2 (tone alone)	Day2 (tone alone)	Day2 (tone alone)
	Mouse 1	Mouse 2	Mouse 3	Mouse 4	Mouse 5		Mouse 1	Mouse 2	Mouse 3	Mouse 4	Mouse 5
0
1
2	0.065249	0.234018	1.12626	3.24242	2.77597		0.110517	0.443417	2.43012	2.71814	-0.13155
3	-0.04574	-0.34883	1.17936	2.42784	2.13316		-0.35354	0.09752	1.89148	1.85495	-0.2193
4	-0.05324	-0.0071	0.976157	2.06549	1.77861		-0.89983	0.029817	1.30252	1.06873	0.306613
5	-0.14085	-0.21843	0.425327	1.97265	1.22391		-0.76314	-0.76806	3.18411	0.757782	0.219325
6	-0.25432	0.152964	0.36343	2.42226	1.23401		-0.35479	-0.24246	1.4975	0.297423	0.278716
7	-0.26411	-0.59845	0.556199	1.62456	0.993661		-0.15188	-0.30742	1.22919	-0.06184	-0.13723
8	-0.10727	-0.20734	0.297066	1.39599	0.97142		-0.86354	-0.20726	1.58492	-0.19455	0.483247
9	-0.18162	-0.16192	0.161632	1.38965	1.57035		-0.4751	-0.25678	0.98135	-0.13039	0.996397
10	-0.20577	-0.2743	0.472655	0.834272	1.74854		-0.7491	-0.25381	-0.21791	-0.90039	1.57269
11	-0.76742	-0.44896	-0.32102	0.692805	1.39495		-0.26612	-0.54605	0.387282	-0.8663	0.181397
12	-0.62534	-0.55538	0.212527	0.486302	1.38932		-0.6984	-0.39508	0.003599	-0.49697	-0.3463
13	-0.49885	-0.41639	0.646392	0.596632	2.19713		-0.49992	-0.08003	0.329197	0.498001	-0.64325
14	-0.43947	-0.37727	0.565428	0.697138	2.61927		-0.2623	-0.69923	-0.45801	1.34276	-0.8781
15	-0.47998	-0.38865	0.982585	-0.38782	2.75108		-0.17872	-0.59477	0.004852	1.3907	-0.60893
16	-0.44584	-0.58109	0.823475	-0.28799	1.59232		-1.07257	-0.36562	0.053781	1.38007	0.645624
17	-0.5003	-0.55008	-0.1747	0.137508	0.804199		-0.95613	-0.50871	-0.59797	2.08392	0.239654
18	-0.59721	-0.35668	-0.39148	-0.07737	0.979689		0.453026	0.707422	-0.82886	1.24541	0.375413
19	-0.5646	-0.36579	-0.41723	-0.89225	0.828117		0.997818	1.27076	-0.59634	0.291639	-0.02021
20	-0.52261	-0.4551	-0.21071	-0.78363	1.02917		1.89715	2.86325	-0.72754	-0.67092	0.196968
21	-0.60311	-0.47989	0.022811	-0.63174	0.956513		1.62021	2.35884	-0.87833	-1.39474	0.341619
22	-0.60949	-0.29129	2.63399	-0.62209	0.730672		0.076503	-0.4425	-0.38696	-1.31192	0.286263
23	-0.65579	-0.12015	1.60307	-0.21817	0.441822		1.28112	1.39809	0.452698	-1.2104	0.357606
24	-0.61825	0.15151	0.367658	0.248647	0.498627		0.952444	1.31084	1.46412	-1.49688	0.402969
25	-0.69759	-0.43313	0.446214	0.330259	0.518474		0.989917	1.09358	0.437458	-1.45367	-0.2232
26	-0.71912	-0.59674	0.604723	-0.20576	0.140589		1.18559	0.879345	-0.75382	-1.17365	-0.2803
27	-0.3136	0.041625	0.943315	-0.92716	0.359643		-0.44109	-0.31458	-0.63413	-0.81815	0.623934
28	-0.09898	-0.12477	0.366595	-0.95557	-0.06292		-0.42302	-0.61074	-0.89618	-0.91565	0.441637
29	-0.26153	-0.53407	0.136048	-0.83339	0.135308		-0.81586	-0.75534	-0.51103	-1.09018	0.842664
30	-0.08567	-0.54095	0.272809	-0.87088	0.298357		-1.00459	-0.56799	-0.00262	-1.17173	0.091872
31	-0.03229	-0.37963	0.71747	-1.32902	1.71787		-0.47126	-1.04059	-0.85115	-1.34269	0.080785
32	-0.10152	-0.51319	0.226318	-0.88993	1.72534		-0.61403	-0.96197	-0.60158	-0.79899	-0.24291
33	0.139257	-0.48042	0.523499	-0.18846	0.583642		-0.61699	-0.68981	0.341419	0.553875	0.031101
34	-0.074	-0.18792	-0.48794	-0.47187	0.281413		-0.7795	-0.90458	1.00384	1.25722	0.525531
35	0.052281	-0.08402	-0.04862	-0.38229	0.249212		-0.25272	-0.52497	0.920332	0.616078	0.40991
36	-0.29215	-0.15021	-0.21385	-0.21219	0.014308		0.034282	-0.5222	1.8669	0.399316	-0.07823
37	-0.46877	-0.78552	-0.2101	-0.07964	-0.08868		-0.13453	-0.70505	1.50154	0.500083	-0.05478
38	-0.55282	-0.75898	-0.3492	0.372599	-0.12626		-0.74185	-0.18502	1.79307	0.969247	-0.08954
39	-0.49891	-0.58002	-0.06532	-0.05756	-0.43243		-0.19891	-0.24001	0.034766	0.382271	-0.19526
40	-0.39075	0.123999	-0.46831	0.30642	-0.13908		-0.10629	-0.85267	0.063054	0.106471	0.069153
41	-0.4019	0.053494	-0.59515	-0.37258	-0.05502		-0.91097	-0.08702	-0.03472	0.191874	-1.14526
42	-0.45766	0.058526	-0.57116	-0.65427	-0.32682		-0.06116	-0.30462	0.142422	0.031858	-1.77091
43	-0.67194	-0.50294	-0.97404	-0.57612	-0.59027		0.002504	-0.41368	-0.22761	0.420382	-1.00271
44	-0.61732	-0.83098	-0.60443	0.224159	-1.12294		-0.6111	-0.22458	-0.31908	1.10914	-0.85461
45	-0.52276	-0.51306	-0.07765	0.475472	-0.35168		0.106881	-0.27043	-0.51734	-0.46118	-0.90843
46	-0.5074	-0.58982	-0.91668	0.806203	0.603755		-0.24228	-0.49631	-0.28017	-1.71929	-0.03182
47	-0.56749	-0.61629	-1.00298	0.401701	-0.37421		-0.20678	-0.3807	1.22709	0.62358	2.39091
48	-0.6409	-0.94226	-0.99676	-0.39584	0.050858		-0.50536	-0.40713	0.504681	1.20367	1.10531
49	-0.13879	-0.27815	-0.48888	-0.53759	-0.22955		-0.36876	-0.48493	-0.57182	1.33061	0.787408
50	-0.35709	-0.71953	-0.25817	-0.0547	-0.50399		-0.05372	-0.5323	-0.13882	1.66214	0.001484
51	-0.58682	-0.5669	-0.28935	-0.72562	-0.44358		-0.46198	-0.26075	0.15139	1.11725	0.064569
52	0.061871	-0.01752	-0.92076	-0.73895	-0.50495		-0.54232	-0.55965	-0.21436	0.051738	0.644208
53	0.155056	-0.22466	-1.04673	-1.14227	-0.44142		-0.39696	-0.50848	-0.1382	-0.34787	0.1056
54	-0.08018	-0.45271	-0.71198	-1.4602	-0.99227		-0.64336	-0.3319	-0.82773	-0.43761	-0.2742
55	-0.25028	-0.77197	0.615543	-1.09624	-0.85203		-0.54579	-0.42038	-0.38151	-1.51416	0.324868
56	-0.50167	-1.02998	0.125558	-0.93068	-0.88994		-0.60954	-0.68377	-0.8483	0.409382	-0.99008
57	0.541525	0.407067	0.882123	-1.1672	-0.68967		-0.42764	-0.41238	-0.91637	0.718235	0.476859
58	0.589704	0.556049	0.563735	-0.39807	-0.5651		-0.50515	-0.19351	-0.83088	1.30957	-0.44485
59	-0.09134	-0.61869	1.59472	0.126592	-0.90298		-0.19169	-0.19522	-0.52563	0.718713	-0.54691
60	-0.35229	-1.08308	-0.46315	-0.21154	-0.96812		-0.24107	-0.41938	-0.62569	1.23855	-0.52093
61	0.05426	-0.56374	-0.24395	0.513101	-1.30272		-0.6606	-0.10629	-0.74251	0.118344	-0.75806
62	0.094528	-0.82384	-0.07989	0.547533	0.185156		-0.14345	-0.40397	-1.05734	-0.70417	-0.50963
63	-0.45016	-1.29107	0.205878	0.351367	-0.49933		-0.59113	-0.3815	-0.18244	-1.56549	-0.90305
64	-0.31326	-1.10621	0.919217	0.451114	0.303023		-0.27371	-0.3407	-0.58525	-2.0163	-0.98844
65	0.122028	-0.49359	-0.33021	0.740776	-0.74296		-0.45341	-0.06559	-0.58264	-2.24251	-0.83174
66	1.03358	0.109839	-1.14734	0.773713	-0.18804		-0.18323	0.257871	-0.8379	-2.4673	-1.12365
67	0.749681	0.110009	-0.64974	1.22934	-0.01709		-0.46626	0.046774	-0.91277	-1.23464	-1.07671
68	0.615455	-0.40571	-0.06834	-0.17164	-0.01737		-0.00776	-0.2007	-0.46915	-1.40294	-0.45693
69	0.17304	-0.76075	-1.32254	-0.56347	-1.32745		-0.10119	-0.33765	-1.58915	-1.3067	-0.62212
70	1.42368	0.584169	-0.04991	-1.10648	-0.83177		-1.08674	0.476854	-0.60757	-0.77072	-0.8664
71	1.89309	1.3292	-0.80762	-0.9614	-0.94489		-0.04066	0.167508	-1.06593	0.140814	-0.91395
72	0.847556	0.54649	-0.54162	-0.86946	-0.69507		-0.39111	0.000828	-0.89764	0.874997	-0.78985
73	0.443538	0.149936	-1.36562	-0.41677	-0.75002		0.046745	-0.02921	-1.13805	0.416552	-1.41306
74	-0.20557	-0.8377	-0.87717	-0.43085	-0.98877		-0.46175	-0.01679	-1.32937	-1.22457	-1.08507
75	-0.39927	-0.75668	0.011648	0.371828	-0.43891		-0.38948	-0.17248	-0.31399	-0.67842	-1.17805
76	-0.38383	-0.96699	0.546954	0.431569	-0.92497		-0.42312	-0.83899	-1.09559	-0.59688	-0.99286
77	-0.41577	-0.67501	0.988734	-0.72189	-0.48355		-0.08541	-0.54782	-1.34065	0.821852	-1.32072
78	0.234094	-0.25061	-0.37106	-0.85672	-0.31084		-0.7661	-0.33171	-0.05361	0.76097	-0.71131
79	0.414873	-0.00993	0.237602	-0.49711	-0.73335		-0.07751	-0.09458	-0.6363	0.550635	-0.84735
80	-0.28592	-1.13042	-0.22851	-0.85403	-1.13324		-0.24342	-0.24496	-0.8138	0.46135	-1.08501
81	-0.53697	-0.99699	-0.51156	-0.42298	-1.14552		-0.69236	0.229867	-0.57306	-0.22183	-0.34835
82	0.520346	0.333808	-0.11803	-0.47153	-1.28454		-0.45454	-0.66782	-0.34994	0.337848	0.244462
83	0.153759	-0.72488	-0.38129	-0.89094	-1.38108		-0.31355	-0.92598	-0.50495	-0.33146	0.212345
84	-0.19985	-1.068	-0.99763	-0.73367	-1.51364		-0.4362	-0.63184	-1.03859	-0.84445	-0.32298
85	-0.41214	-1.28799	-0.27681	-0.27198	-1.32091		-0.64007	-0.29822	-1.02797	-0.4705	-0.50118
86	-0.56282	-1.09759	0.169644	-0.3509	-1.5479		-0.25251	-0.16985	-0.39696	-1.02222	-0.55795
87	-0.43865	-0.97115	-0.25348	0.555704	-1.29792		-0.07835	-0.28839	-0.73991	-0.91495	0.013648
88	1.16579	0.29144	-0.87696	-0.50064	-1.62152		-0.47166	-0.15505	-1.24544	-0.67319	-0.34837
89	1.16119	0.41558	0.091752	-0.93422	-1.68706		-0.31176	-0.31748	-0.66577	-0.69596	-0.42893
90	0.094217	-0.32073	-0.59593	-0.67627	-1.4859		-0.27067	-0.79944	-0.47262	-0.84001	-0.77876
91	-0.31465	-0.64971	0.053812	-0.5765	-1.13329		-0.61795	0.179554	-0.66625	0.386679	-0.78452
92	-0.29331	-0.42613	1.5533	-0.15541	-1.0479		-0.03547	0.551696	-0.4919	0.13009	-0.68617
93	-0.35245	-0.441	0.848421	-0.54187	-1.87576		0.622401	1.20443	-1.42088	0.098333	-1.10501
94	-0.42883	-0.71637	0.42656	-0.04545	-1.77989		-0.22039	-0.12592	-1.17133	0.003177	-1.25086
95	-0.15029	-0.51466	0.206036	0.176598	-1.44078		-0.20091	-0.63413	-0.46733	-0.62736	-0.55162
96	-0.18691	-1.03713	0.868763	-0.09574	-0.15028		-0.41947	-0.61298	-0.82198	-0.29518	-0.8457
97	-0.14639	-1.17149	1.057	-0.32077	0.083673		-0.85097	-0.7417	-0.48461	-0.02687	-0.75691
98	1.03683	-0.25299	-0.07475	-0.22485	-0.17217		-0.70836	-1.03707	-0.55497	-0.19281	-0.6556
99	0.052685	-0.79396	0.686226	-0.36967	-0.07147		-0.59255	-0.75317	-0.47412	-0.42279	-0.85207
100	-0.57453	-1.13421	0.784498	0.109293	0.80886		-0.9803	-0.54495	-0.46182	0.686423	-1.0635
101	-0.74967	-0.6811	2.04355	-0.24577	0.139797		-0.71115	-0.54943	-1.01826	0.260201	-1.15482
102	-0.47831	-0.54775	1.40271	-0.10866	-0.82021		-0.71528	-0.70601	-0.97316	-0.17784	0.663619
103	0.298143	-0.23649	0.467145	-0.62842	-0.052		-0.93212	-0.64991	-0.93256	-0.13295	-0.78335
104	0.955162	0.623982	-0.26833	-0.97291	-0.053		-0.7578	-0.67322	-0.81822	-0.08519	-0.18638
105	1.94453	1.64202	-0.05612	-0.55335	-0.09816		-0.64093	-0.60886	-0.60491	-0.6444	-0.63255
106	2.58537	1.84307	0.539469	-0.99723	-0.32631		-0.82819	-0.43248	-0.44946	0.199834	-0.5314
107	2.28702	1.55614	-0.1933	-0.31696	-0.36538		-0.29771	-0.45434	-0.75552	-0.08798	-0.7793
108	2.00924	1.31421	-0.71761	-0.35131	-0.53217		-0.4728	-0.28857	-1.07771	-0.08351	-0.22221
109	0.556169	0.063777	-0.09829	0.029502	-0.58039		-1.00776	-0.37304	-0.5198	0.125418	0.46677
110	0.190884	-0.34737	0.856967	-0.42385	-0.55858		-0.5652	-0.31316	-0.85326	0.579112	0.200839
111	-0.12652	-1.33185	-0.04998	-0.35791	-0.64564		-0.86821	-0.47919	-0.99351	-0.26509	1.01327
112	0.476379	-0.90345	-0.56657	-0.39443	-0.64671		-0.82738	-0.58513	-0.72807	-0.31953	2.27751
113	0.429929	-0.97863	-0.33273	-0.65417	-0.89178		-0.53415	-0.67532	0.209465	0.036689	0.656445
114	0.445642	-0.64117	-0.31057	-0.51954	-1.78387		-1.11166	-0.36105	-0.88142	1.55271	1.08036
115	1.06366	0.056488	-0.27261	-0.34112	-2.00341		-0.59613	-0.42364	-0.88373	1.21497	0.508258
116	0.663408	-0.14703	-0.38107	-0.60833	-1.59564		-0.84228	-0.14801	-0.5325	0.769753	0.000328
117	0.290185	-0.4942	-0.82655	-0.66338	-1.56847		-0.76821	-0.07876	-0.5606	0.961716	0.023393
118	0.226857	-0.54994	-0.46749	-0.28812	-1.41042		-0.72552	-0.31737	-0.58735	0.935553	-0.18859
119	0.180318	-0.39461	-0.41939	0.468388	-1.05834		-0.78968	-0.34763	0.011454	1.30608	-0.22836
120	0.095707	-0.61325	0.127812	0.329749	-0.94394		-0.06602	-0.29135	2.04517	1.22915	0.98925
121	0.86383	0.163491	-0.02998	0.302973	-0.54098		0.860992	0.160676	0.589334	0.015348	-0.21282
122	0.832661	1.20507	-0.43197	-0.11357	-0.74106		-0.04241	-0.31869	0.75332	-0.01905	-0.52285
123	0.966481	1.15966	0.012295	0.220805	-0.71971		-0.24324	-0.62896	0.377806	-0.08217	1.03478
124	1.45032	1.00496	0.272026	0.375574	-0.73344		-0.48164	-0.21971	0.789994	-0.37702	1.27468
125	1.77032	1.08351	-0.06983	-0.42595	-0.65429		0.67912	0.977256	-0.1827	-0.4479	0.890676
126	1.22613	0.644709	0.748705	0.307856	-0.55049		0.284112	-0.07916	-0.21329	-0.12249	2.00258
127	1.60891	0.887195	-0.90865	-0.41306	-0.79476		0.024753	-0.45052	-0.03858	0.444212	0.200865
128	1.833	1.00006	-1.39789	-0.48961	-0.99527		-0.11856	-0.52043	-0.05532	0.037997	-0.44146
129	1.34948	0.691201	-0.32129	-0.21403	-0.89354		-0.02634	-0.98301	-0.11191	0.255803	-0.40174
130	1.36285	0.441549	-0.9135	-0.44736	-0.98549		0.055869	-0.86703	-0.10515	-0.16958	-0.96868
131	1.23101	1.13769	-0.0669	-0.50716	-1.0292		-0.15565	-0.44612	-0.38684	0.319244	-0.71116
132	2.05828	1.17616	-0.45474	-0.13426	-0.77019		-0.16077	-0.15381	0.313876	0.385458	-0.73434
133	1.78255	1.07117	-1.02908	-0.66558	-1.12505		-0.90728	-0.79479	0.602591	-0.18589	0.767546
134	1.39783	1.00398	-0.07263	-0.61899	-0.97679		-0.42454	-1.08016	0.683057	-0.01071	1.29948
135	0.5395	0.720282	1.22845	-0.19643	-1.20539		-0.58102	-0.82118	0.725076	0.513695	0.784693
136	1.23364	1.10823	-0.08257	-0.40498	-1.2049		-0.19106	-1.06316	1.81492	0.146203	0.573709
137	1.50436	1.08218	0.23318	-0.00551	-1.32313		-0.62595	-0.95509	0.836881	-0.06422	-0.43434
138	1.07321	0.926718	-0.45246	-0.15684	-1.30615		-0.45464	-1.24583	0.944336	-0.33295	-0.57188
139	1.79904	1.59159	-0.25142	0.063838	-1.29265		-0.53783	-0.94038	1.70277	0.449059	-0.32847
140	1.42149	1.33991	-0.07527	0.102629	-1.09604		-0.53387	-0.9341	1.60207	0.755592	-0.89504
141	0.848683	1.08838	-0.90753	-0.24444	-1.39999		-0.43478	-0.78866	1.27943	-0.0075	-0.70834
142	2.16171	2.03832	-1.06455	0.036261	-0.52676		-0.24005	-0.86957	0.748764	-0.03425	-0.99772
143	1.90165	1.61757	-0.98138	-0.02346	-0.45671		-0.3797	-0.64389	1.12658	-0.17213	-0.75375
144	2.03966	1.93466	-1.26181	0.243351	0.25079		-0.23347	-1.14342	1.80981	-0.1532	-1.17868
145	1.82431	1.69956	-1.3814	0.978391	0.525194		-0.74965	-0.72893	0.653348	0.218414	-0.85219
146	1.38373	0.679537	-1.40355	0.73006	-0.26778		-0.41088	-0.88192	-0.32184	-0.15994	-1.07285
147	1.33622	1.45653	-1.08229	0.131185	-0.64444		-1.04477	-0.76768	-0.12372	-0.67559	-1.256
148	4.02222	7.41055	9.46983	4.5822	4.0609		-0.41698	-0.65473	-0.01365	0.225504	-1.05683
149	4.0316	6.09054	7.00624	2.77645	2.41052		-0.50149	-0.9074	-0.50603	-0.28819	-0.0597
150	1.63722	3.03952	3.13024	-1.08732	0.837245		-0.43349	-0.88865	1.34801	-0.42251	0.618823
151	0.264137	1.1881	-0.14685	-2.03379	-0.82284		-0.5025	-0.87001	-0.25441	-0.47647	0.595224
152	-0.34876	0.544811	-0.68368	-1.18858	-0.72767		-0.76105	-0.45937	-0.16232	-1.06037	0.434547
153	-0.97686	-0.8131	0.581794	0.068994	-0.42752		-0.19868	-0.51447	-0.59411	-0.80658	0.424497
154	-0.3912	-1.24852	0.034701	0.074432	0.501409		-0.60379	-0.75306	-0.91757	-0.96379	0.792275
155	-0.92596	-1.21348	-0.33186	-0.27766	0.653383		-0.22924	-0.47653	-0.18752	-0.87176	1.71311
156	-1.75113	-1.12104	0.031019	0.485405	-0.02116		-0.75904	-0.39583	-1.00279	-0.91373	0.422739
157	-1.7927	-1.05064	1.20112	0.796276	0.677952		-0.27295	-0.40507	-0.78691	-0.81646	0.92923
158	-1.4488	-0.9393	0.565987	1.58977	0.826338		-0.46779	-0.7329	-0.72514	-0.13048	0.001843
159	-1.22526	-0.79373	0.110495	0.597317	0.419067		-0.07409	-0.75323	0.472513	0.227153	-1.05546
160	-1.67437	-0.79493	-0.20363	1.27981	0.346853		-0.3353	-0.94152	0.465361	-0.26824	-0.37251
161	-1.05377	-0.67124	-0.44983	1.48805	0.350706		-0.85059	-0.75703	0.47137	0.016345	-1.1898
162	-1.03947	-0.28874	-0.00318	1.04471	0.159181		-0.19808	-0.84091	0.072496	-0.18524	-0.89289
163	-1.41386	-0.82236	0.96635	1.73287	0.192699		-0.62671	-0.53842	0.731039	-0.40158	-0.85143
164	-1.31678	-1.07649	0.084745	1.7315	-0.1037		-0.39039	-0.68608	0.0557	-0.30262	-1.18189
165	-1.16116	-0.92428	0.55909	0.718305	0.201187		-0.82662	-0.77154	0.398036	-0.60864	-0.34513
166	-1.42355	-0.62266	-0.14731	-0.31274	1.03532		-0.66019	-0.33084	-0.71276	-0.53703	-0.68841
167	-1.3273	-0.77326	-0.67601	-0.05989	0.904709		-1.08056	-0.46089	-0.47885	0.238692	-0.09716
168	-1.28982	-0.69726	-0.23613	0.162296	1.29866		-1.23823	-0.82265	-0.06856	-0.47809	0.088607
169	-1.33316	-0.71097	-0.78641	1.34259	1.30378		-1.39243	-0.53689	0.961017	-0.22178	-1.25273
170	-1.58753	-0.45564	-0.21066	1.14728	1.05029		-0.86499	-0.46594	1.22507	-0.57047	-0.59646
171	-1.51327	-0.26568	0.51025	1.16514	0.671129		-0.63075	0.542389	1.49246	-0.74005	-0.76533
172	-0.94757	-0.36526	1.01202	0.997468	0.749629		0.099734	0.638377	0.464998	-0.04963	-0.81428
173	-0.99064	-0.60434	-0.83427	1.35971	0.648202		0.949675	1.35484	0.312718	-0.66406	-0.70347
174	-1.3872	-0.42309	-0.35437	0.711274	0.299942		1.08071	1.62955	0.232362	0.249559	-0.88147
175	-1.41165	-0.32871	-0.71673	-0.08083	0.151331		0.204774	-0.10054	0.340709	-0.38752	-1.0716
176	-1.19814	-0.2615	-0.19268	-0.59639	0.478698		0.349628	-0.43499	-0.60092	-0.43715	-0.82316
177	-1.19663	-0.89236	-0.59765	-0.58156	0.529759		0.147892	-0.45601	-0.59448	-0.14674	-0.93067
178	-1.37029	-0.43675	0.406474	-0.408	0.482271		-0.22851	-0.77844	2.02271	-0.39428	-1.02708
179	-1.34638	-0.23992	-0.25874	-0.55491	1.48854		0.26885	0.193247	-0.03231	0.905094	-1.54274
180	-0.87438	-0.42509	-0.02732	-0.64927	1.16877		0.528047	-0.12702	-0.43967	-0.05226	-1.23307
181	-0.74583	-0.33542	0.482875	-0.50796	0.569795		0.396852	-0.08944	-0.11525	-0.13364	-0.85921
182	-0.25562	0.210464	0.03535	-0.33549	0.652975		0.397598	0.171748	-0.71638	0.820543	-0.25319
183	0.818402	0.725081	-0.68704	0.879677	0.716289		0.251192	-0.0326	0.221525	-0.22667	0.719343
184	0.957247	0.82325	0.29136	1.09483	0.944209		-0.47185	-0.53424	-0.5229	-0.44598	2.65961
185	0.021814	0.630392	0.008787	1.37385	1.22598		-0.12397	-0.77463	0.375667	-0.42843	1.40274
186	0.089691	0.217914	-0.96701	1.06442	0.983883		1.0321	0.893111	1.79289	-0.69714	3.2018
187	0.210501	0.390322	-0.92242	1.78922	0.841395		1.57807	1.59716	-0.58722	0.504387	2.15035
188	0.601753	0.838777	-0.82896	1.46298	1.42167		0.728482	0.203919	1.22385	-0.1541	2.07461
189	1.05907	1.02893	0.477779	1.5999	0.964516		2.09406	1.87864	0.034307	-0.38011	2.05113
190	0.928047	0.854398	-0.19854	0.291089	0.852457		2.66538	2.60379	-0.82549	-0.36966	2.38764
191	1.05492	1.02538	-0.75147	-0.63824	0.756619		3.11613	2.85426	0.590654	-0.14941	1.76111
192	0.425179	0.880468	-0.79279	-0.55732	0.060487		3.45993	2.75907	-0.19695	0.094091	2.37754
193	-0.03259	0.658026	-0.25462	-0.96544	-0.12252		3.0619	2.8146	0.439768	-0.06217	2.05207
194	-0.80201	0.658438	-0.748	-0.79254	-0.51636		2.57957	2.30536	2.57842	-0.12441	1.00433
195	-0.57277	0.287416	0.097017	-0.75422	-0.60384		2.33359	2.15915	0.12035	-0.51664	0.517447
196	-0.91894	-0.03795	0.32879	-0.64121	-0.48399		2.87071	2.81203	0.693025	-0.48807	1.44928
197	-1.09719	-0.201	-0.616	-0.76207	-0.26099		2.04594	1.31438	0.444912	-0.46133	0.249914
198	-0.7617	-0.74672	-0.69594	-0.01633	-0.22805		1.92955	1.78591	-0.24259	0.82146	1.32567
199	-1.1127	-0.66763	-0.55084	0.381402	-0.2652		1.56033	1.20873	-0.32351	-0.13195	1.12017
200	-0.07118	0.542711	-0.06557	0.133754	-0.59519		2.83525	2.88717	-0.38583	-0.36937	1.05863
201	-0.08808	0.56185	-0.34207	0.679533	-0.54819		2.03276	2.3963	-0.35281	0.328245	0.80857
202	-0.41777	0.655343	0.00957	-0.09809	-0.477		1.47033	2.14485	0.847	-0.02251	-0.01334
203	-0.5296	0.67321	-0.43475	0.54176	-0.35578		1.75893	2.30819	-0.22454	0.176331	0.357911
204	-0.83811	0.13369	-0.52153	1.66381	-0.90127		0.891199	1.41623	0.764882	-0.09891	-0.00999
205	-1.24146	-0.3824	-0.77299	0.317669	-0.86339		0.686254	1.48333	0.576941	0.324315	0.064552
206	-1.19716	-0.36208	-1.21423	0.085389	-0.71311		0.516433	1.52533	-0.24743	0.167571	-0.47505
207	-1.11813	-0.034	-0.0397	0.625297	-1.05537		1.98358	2.44767	-0.13481	-0.03705	-0.32743
208	-1.29372	-0.64973	-0.09069	1.14586	-0.66738		0.388678	0.109856	-0.32932	0.253174	0.272971
209	-1.10681	-0.2669	-0.65345	0.323871	-1.27745		1.75193	1.73538	-0.33895	0.335353	1.46484
210	-1.20603	-0.04207	-0.59182	1.19033	-1.12434		2.76096	2.48156	0.44323	-0.01261	1.66503
211	-1.14495	0.243817	-0.94443	1.35903	-0.78537		4.0498	3.70129	0.21192	-0.16242	2.82351
212	-1.05683	0.302184	-0.57402	0.526203	-0.59532		2.47725	2.68632	-0.67348	-0.52579	1.99763
213	-0.98914	-0.16889	-0.8555	0.578211	-0.66121		2.12021	1.95399	-0.70916	0.867741	2.21894
214	-1.16558	-0.17878	0.095604	-0.59109	-1.25587		1.41593	0.568984	-0.33375	0.472864	2.50452
215	-0.91462	0.140046	-0.19996	-0.33297	-0.95361		3.07942	2.19471	-0.52265	0.461052	0.831123
216	-0.59748	0.056941	-0.59026	-1.03671	-0.14463		2.47814	1.80236	0.085303	0.360687	0.2156
217	-0.30534	0.139917	-0.03199	-0.78159	-0.57876		0.116765	0.151597	-0.47479	1.11096	0.301004
218	-1.04614	-0.20374	-0.48093	-1.06692	-1.33943		-0.16623	0.147132	-0.58152	-0.08335	-0.11363
219	-0.39025	0.060941	-0.14292	-0.84969	-1.0748		-0.58073	-0.49234	0.905045	0.743094	-0.61355
220	-0.01763	0.321887	1.28186	-1.61291	-0.49807		-0.61037	-0.43877	-0.44496	0.415511	0.01004
221	0.160902	0.32092	0.14375	-1.3042	-0.38741		-0.57729	-0.35497	-0.05677	-0.17128	0.933857
222	0.558157	0.648195	-1.29601	-1.25453	-0.01171		-0.40438	-0.25697	-0.49433	-0.1529	0.601604
223	0.611761	0.875654	-0.92667	-1.25272	-0.14185		-0.32008	-0.31602	0.982352	0.65867	-0.07391
224	-0.82359	0.095361	-0.05487	-1.14463	0.051633		-0.54809	-0.71747	-0.76877	1.72502	-0.19573
225	-0.68212	0.035879	-0.95443	-0.3193	0.020519		-0.7514	-0.57394	-0.73227	1.14267	0.472757
226	-0.37157	0.189638	-1.27877	0.022948	0.232725		-0.41876	-0.40121	-0.5766	1.02079	-0.11474
227	-0.61844	-0.19991	-0.60698	-0.0558	1.09684		-0.36727	-0.46102	-0.42885	0.422175	-0.27252
228	0.742599	0.250762	-0.2222	-0.12193	-0.13041		-0.69206	-0.27627	-0.915	0.414299	-0.10101
229	1.70939	0.809812	0.705294	-0.59268	-0.42462		-0.59727	-1.10664	0.458454	0.186924	0.861143
230	1.34455	0.851359	-0.82549	-0.92438	-0.6994		-0.66674	-0.87418	-0.96281	0.323976	-0.14636
231	1.56756	0.908514	-0.77529	-0.75439	-0.92021		-0.78374	-0.58558	-0.14866	1.22408	-0.23005
232	1.35301	0.713326	-1.003	-1.13144	-0.67608		-0.58578	-0.45483	-0.70315	-0.08205	-0.64493
233	1.67616	1.07756	-0.30216	-0.8924	0.096327		-0.30884	-0.50355	-0.59835	-1.1019	-0.19566
234	0.530804	0.642176	-1.13789	-0.96718	-0.84702		-0.61759	-0.36238	1.11023	-1.20118	0.188529
235	-0.67361	-0.87197	-1.26357	-0.57937	-0.92559		-0.33882	-0.44725	-0.13105	-1.43104	-0.02589
236	-0.55714	-0.57874	-1.23146	0.43102	-0.93355		-0.65092	-0.43704	0.018388	0.078539	-0.17188
237	0.737794	0.011156	-0.5485	-0.85263	-0.83868		-0.22299	-0.40911	0.033281	0.542421	-0.80752
238	0.515346	0.667702	-1.28456	-1.29913	-1.3195		-0.41497	-0.21677	0.217577	0.846703	-0.23552
239	-0.71165	-0.45804	-0.4845	-1.32306	-0.52751		-0.52579	-0.20969	-1.00059	1.00302	-0.1474
240	-0.57709	-0.79724	-0.49659	-1.12156	-0.84711		-0.32019	-0.42483	-0.19457	0.953755	0.132564
241	-0.40604	-1.11093	-0.99987	-1.39328	-0.15552		-0.38142	0.138977	0.322415	0.769801	0.09463
242	-0.65452	-1.70198	-0.10382	-0.99219	0.029862		-0.73861	-0.59139	2.65307	1.31891	-0.14732
243	-0.76948	-1.20983	-0.2916	-0.77097	-1.08942		-0.49993	-0.9454	1.68992	0.972408	-0.1832
244	-0.82941	-1.12206	-0.59558	-1.22243	-0.66098		-0.7978	-0.31309	-0.42956	0.456048	-0.23707
245	-0.21009	-0.87209	-0.28779	-1.24852	0.09509		-0.37318	-0.43639	0.317973	0.240707	-0.09101
246	-0.6226	-1.32172	0.995757	-0.98824	-0.09943		-0.69487	-0.1734	0.005251	1.24012	-0.29409
247	-0.71218	-1.88788	-0.69854	-0.437	0.137613		-0.34758	-0.2337	-0.00458	1.89267	-0.35196
248	-0.21032	-1.45054	1.5203	-1.71117	0.179914		-0.74491	-0.36637	0.027655	0.335715	0.140919
249	0.096857	-0.6758	0.051346	-1.23298	0.437857		-0.07804	-0.21133	0.573146	-1.38698	-0.34901
250	1.91893	0.552259	-0.03369	-1.46494	0.38574		-0.253	-0.11313	2.87492	-1.79437	0.554051
251	2.80747	1.26721	-0.87104	-0.64924	0.444051		-0.41218	-0.53085	0.895714	-1.46897	0.300025
252	2.50758	1.37764	-0.42211	-0.90779	0.291581		-0.16351	-0.51807	0.30987	-1.64395	0.289656
253	2.8237	1.39813	-0.35069	-0.6061	0.256344		-0.13709	-0.52981	-0.64746	-2.45367	-0.13737
254	1.10293	-0.05357	-0.55237	-0.89619	0.607893		-0.70218	-0.24974	1.44614	-1.89708	-0.67617
255	0.609403	-0.86216	-0.02312	-0.68124	-0.03891		-0.23207	-0.49588	2.26034	-2.1877	-0.12825
256	1.69099	0.628762	-0.58197	-0.55488	-0.14045		-0.39868	-0.66804	-0.29471	-1.65334	1.50262
257	1.93714	0.901632	-0.60939	-0.28141	-0.61225		-0.50541	-0.58931	-1.10536	-2.22307	2.37631
258	1.58675	0.831817	-0.66633	-0.86457	0.687244		-0.32048	0.260681	-0.75703	-1.83242	1.1368
259	1.12847	0.026093	-0.21955	-0.46065	0.045628		-0.74389	-0.26301	0.535579	-1.61118	0.929239
260	1.63051	0.571599	-0.10274	-1.23138	-0.32982		-0.52976	-0.88576	-0.84094	-1.77028	0.685762
261	1.39332	0.761392	-0.20593	-0.55282	0.051348		-0.27277	-0.88151	-0.43748	-1.9166	0.953431
262	0.341833	0.071201	-0.56929	-0.72491	-0.25324		-0.23329	-0.65629	0.176415	-2.22799	0.838387
263	2.37424	1.45539	-0.45565	-0.79677	-0.21527		-0.35623	0.035566	0.14756	-2.29759	0.37111
264	2.46824	1.20242	-1.2779	-0.71183	-0.47237		0.055207	-0.03516	0.227082	0.286693	1.70064
265	0.033227	-0.91411	-1.09883	-0.40354	-0.75699		-0.01001	-0.13572	0.927198	0.575148	-0.43168
266	0.707819	0.215427	-0.27248	-0.00916	-0.4193		-0.6989	-0.21301	0.680045	-0.00118	0.079754
267	0.113026	-0.07622	-0.46203	0.661077	-0.43175		-0.54103	-0.10779	0.982929	0.915988	-0.25413
268	-0.488	-0.90978	-0.70511	0.764175	-0.32365		-0.30206	-0.15418	-0.03947	0.841207	0.959577
269	-0.69476	-1.34665	-0.21548	1.07495	-0.30316		-0.49152	-0.56372	0.378369	0.555604	0.558813
270	-0.72983	-1.19014	-0.2564	0.884364	-0.23619		-0.21228	-0.27878	0.142802	0.421575	0.005505
271	-0.58443	-1.22678	-0.98944	0.048244	-0.57469		-0.42822	-0.17037	-0.19137	-0.51811	-0.13713
272	-0.64364	-0.51549	-1.10121	0.697155	-0.54347		-0.4743	-0.40009	1.2902	-0.68272	-0.23218
273	-0.69632	-0.73237	-0.84923	1.02562	-0.15898		-0.3791	0.049232	0.370154	-0.36462	-0.34411
274	-0.66434	-0.84679	0.836829	0.990879	0.531461		-0.20379	-0.16895	0.163057	0.620689	-0.73357
275	-0.65706	-1.06029	-0.66869	0.630515	0.163207		-0.2381	-0.22189	0.576714	0.780994	-0.73924
276	-0.61305	-1.28393	-1.00373	0.835054	0.46855		-0.5835	-0.62893	1.24477	0.563808	-0.40988
277	-0.64177	-1.16537	-1.14509	0.221469	0.570019		-0.38231	-0.83206	-0.58416	0.496643	-1.03077
278	-0.64155	-0.82148	-0.31557	-0.10758	0.459738		-0.55797	-0.58277	0.30363	1.08204	-0.99046
279	-0.76124	-1.03582	-0.38493	-0.24245	0.102596		-0.729	-0.12286	-0.80051	0.649985	-0.80311
280	-0.8067	-1.16144	-0.75134	0.223749	0.62719		-0.49157	0.081598	-0.16825	-0.07971	-0.75753
281	-0.58603	-1.16003	-0.81655	-0.26033	-0.33564		-0.25319	-0.40818	-0.19448	0.003458	-1.55811
282	-0.69239	-1.01172	-1.09324	-0.47366	-0.41446		-0.25443	-0.34632	-0.42131	1.26447	-1.40117
283	-0.55128	-1.326	-0.78683	-1.04945	-0.80768		-0.66836	-0.11276	-0.96767	0.526566	-0.79335
284	-0.61819	-0.97625	-0.08571	-0.56878	-0.9632		-0.67781	-0.19014	-0.85904	0.827954	0.031776
285	-0.58949	-1.15158	-0.75562	-0.9166	-0.60476		-0.70731	0.380961	-0.87987	0.178529	-0.85651
286	-0.65062	-0.88162	-0.97163	-0.71749	-0.82959		-0.87491	-0.06806	-0.12295	0.054606	-0.66934
287	-0.4671	-1.07334	-0.90247	0.304098	-0.07001		1.63387	1.40856	-0.86443	0.841142	-0.7768
288	0.107762	-0.37087	-0.70963	0.878228	-0.52901		2.79337	1.81034	-0.56077	0.007598	-0.94758
289	1.10721	0.314737	-1.2351	1.3358	-0.34657		1.27581	-0.18615	-1.30736	0.101222	0.402615
290	1.71239	1.1525	-0.75455	0.966096	0.129252		0.573976	0.085671	-0.22518	1.11385	0.083233
291	0.813181	0.661602	-0.27248	0.995001	0.50861		0.676112	-0.02988	-0.9122	0.465797	0.01657
292	-0.46477	-1.66649	0.100315	0.167993	0.022528		2.04318	1.6889	-0.80821	0.191235	-0.73541
293	0.159462	-1.11848	0.688947	0.211982	0.197991		1.65391	1.6636	-0.82847	0.474852	-0.81564
294	1.52187	0.159122	-0.02086	0.221291	-0.68181		2.3627	1.74192	-1.22627	0.625168	-0.95022
295	1.64356	0.261683	-0.09772	0.0033	-0.21633		2.03793	1.46269	-0.75855	-0.1005	-0.88758
296	1.60747	0.292943	-0.33324	-0.01059	1.78972		2.66722	2.16645	-0.6161	0.108961	-0.8452
297	1.36567	-0.26776	1.05985	-0.41799	0.924003		2.6857	2.31686	-0.41207	-0.03608	-0.8716
298	3.61436	4.6787	7.22039	4.16377	4.00935		1.61549	0.630057	-0.28753	-0.3086	-1.08363
299	4.57742	5.27718	5.28749	2.46737	3.19405		1.89625	1.22933	-1.0397	-0.16919	-0.91838
300	1.49879	2.20265	2.29914	1.40722	1.03822
301	0.171824	0.919413	-0.92419	0.804783	0.059922
302	-0.36912	0.873419	-0.09024	0.680431	-0.57861
303	-0.67009	0.953255	-0.49432	-0.01245	0.29342
304	-0.78586	0.8754	0.241908	0.104949	-0.37495
305	-0.2067	1.11717	0.708796	-1.23402	-0.54387
306	-0.16444	0.940334	-0.34719	-0.80067	-0.51839
307	-0.65106	0.689363	0.006474	0.743429	-0.20557
308	-1.06454	-0.24734	0.12444	2.6421	-0.44508
309	-1.22109	-0.61102	-0.45878	1.84307	-0.43423
310	-0.88575	-1.10126	0.495896	1.09742	-0.87362
311	-1.00461	-0.72675	0.216565	1.2389	-0.1451
312	-0.64013	-0.28813	-0.2356	0.432216	0.046495
313	-0.38363	-0.09296	0.090958	0.537011	-0.31426
314	-0.40227	-0.08007	0.043268	1.09988	-0.46917
315	-1.36974	-1.07813	0.114683	1.05036	-0.55789
316	-1.20806	-1.05043	-0.71646	1.41229	-0.28074
317	-1.30772	-0.76418	0.254912	1.11426	-0.66631
318	-0.79097	-0.05675	0.050434	0.3511	-0.68214
319	-1.21433	-0.54843	0.338007	0.233622	-0.13004
320	-1.51214	-0.57404	-0.55681	0.171683	-0.06813
321	-1.27993	-0.51597	-0.00627	0.146697	-0.68967
322	-1.115	-0.30151	-0.41463	-0.13253	-0.61075
323	-0.96502	-0.22415	-0.77803	0.424257	-0.44218
324	-1.19578	-0.26233	-0.51846	0.891337	-0.54895
325	-1.31275	-0.67048	-0.04956	0.788776	-0.64899
326	-0.8759	-0.41177	-0.47553	1.53702	-0.74113
327	-0.72248	-0.23793	-0.56151	0.77618	-0.50059
328	-0.61571	-0.20836	1.41903	-0.213	-0.19128
329	-0.6483	-0.27046	-0.07933	-0.75198	-0.19728
330	-0.39451	-0.22905	-0.05416	-0.71904	-0.3985
331	-1.23251	-0.43824	-0.25646	-0.12684	0.842845
332	-1.61893	-0.76466	-0.53884	-0.21805	0.166332
333	-1.3658	-0.76228	-0.89007	1.14135	0.599499
334	-1.23132	-0.4991	-0.43345	2.52039	0.75285
335	-1.1615	-0.26313	0.06479	2.87556	0.565707
336	-0.9007	0.009653	-0.02838	2.57098	0.86007
337	-0.56545	0.378968	-0.50221	2.59399	1.0937
338	-1.0043	0.093104	-0.05221	1.14626	-0.35235
339	-1.18617	-0.01582	-0.52398	0.319345	0.094142
340	-0.82816	-0.11612	-0.22089	-0.30964	-0.37201
341	-0.92501	0.02453	-0.36951	-0.67374	-0.15541
342	-1.01154	0.182648	0.207194	-0.71742	-0.38861
343	-1.03321	0.112924	-0.15817	-0.51684	1.63545
344	-0.96828	0.447503	0.839203	1.83584	0.651469
345	-1.00123	0.319252	-0.24788	2.63068	0.621826
346	-1.06266	0.126923	0.67587	2.42985	0.92749
347	-1.05213	-0.10217	-0.40623	1.90811	0.427427
348	-1.14922	-0.32025	0.306699	-0.08206	0.650893
349	-1.06628	-0.09196	-0.03457	-0.40642	1.42061
350	-1.03198	0.173809	-0.39466	0.150604	1.90191
351	-0.99375	0.469723	-0.59565	0.51111	1.13017
352	-1.01594	0.19943	0.274468	0.070295	0.86706
353	-1.04805	0.147927	0.518195	0.928554	1.44942
354	-1.06629	0.29613	-0.0839	1.13389	0.842994
355	-0.49584	0.308517	0.351498	-0.49435	1.06756
356	-0.0759	0.312494	0.374102	-0.32443	0.726037
357	-0.94734	0.385936	-0.01759	-0.80835	0.377813
358	-0.88034	-0.14101	-0.3636	-0.56898	1.04884
359	-0.99503	-0.20974	0.269148	-0.06843	1.5538
360	-0.80399	0.29531	-0.58665	-0.46527	0.103858
361	-1.06184	-0.14567	-0.51891	-0.06348	0.513026
362	-0.94773	0.297501	-0.47098	-0.31664	0.322598
363	-1.01537	0.292593	-0.14927	-0.74168	0.292693
364	-1.01245	0.267927	0.294006	-0.79946	0.671842
365	-1.15658	0.19138	0.465698	-0.52051	0.072446
366	-0.99549	0.297393	0.470123	-0.1698	0.191694
367	-0.56987	0.923134	-0.23164	0.237519	0.279772
368	-0.82757	0.444963	0.134006	-0.8723	0.311901
369	-1.09587	0.0688	-0.29696	-0.77753	0.114506
370	-1.03045	0.230444	0.772166	-0.97911	1.13022
371	-1.02251	0.217373	-0.27008	-1.0056	0.944744
372	-1.02312	0.184057	0.097647	-0.25235	1.11043
373	-1.01907	0.265389	-0.33028	-0.48688	0.569212
374	-1.07223	-0.1516	0.089204	-0.43112	0.522367
375	-0.97649	0.27293	0.172458	0.089091	0.30605
376	-0.93463	0.317347	-0.14493	-0.578	0.521445
377	-0.98356	0.292669	0.329967	-0.47139	0.097996
378	-1.02563	0.300384	0.38009	-0.34227	-0.26796
379	-0.97874	0.335056	0.788258	-0.05781	-0.21069
380	-1.03782	0.128028	0.560181	-1.03322	0.129293
381	-0.893	-0.03471	0.259303	-0.08664	0.097261
382	-0.96741	0.297317	-0.02185	-0.17785	-0.17314
383	-0.89	0.586803	-0.63913	-0.7421	-0.24105
384	-0.8691	0.477526	-0.28462	-0.89171	-0.18124
385	-0.9333	0.532618	-0.12929	-0.56394	-0.08063
386	-0.56985	0.39261	1.41147	-0.7512	0.936641
387	-0.12494	0.420472	-0.37571	-0.68432	0.714855
388	-0.76858	-0.10079	-0.29324	-0.3758	1.15511
389	0.050099	0.324923	-0.65958	-1.05635	1.89738
390	1.28697	1.12645	-0.19699	-1.0256	1.70844
391	1.31498	1.16444	0.266486	-0.81055	2.35076
392	1.31347	1.55796	0.16122	-1.09039	2.19019
393	1.16373	1.31016	-0.3769	-0.95896	1.38385
394	1.09949	1.31638	0.929131	-0.93254	1.20372
395	1.2547	1.47907	-0.29199	-1.0034	0.735334
396	2.39897	2.12869	0.053065	-0.96183	1.53128
397	1.03709	1.57208	0.277138	-1.29015	1.57811
398	1.06261	1.10599	0.281183	-2.05769	0.950529
399	1.21607	0.979064	-0.22429	-1.60672	0.895925
400	1.82269	1.69916	-0.07692	-0.72101	0.420273
401	1.25541	1.1274	0.214701	-1.31104	0.603391
402	1.50428	1.67717	-0.0066	-0.74412	0.351675
403	0.514938	1.60338	-0.00417	-0.80332	0.226903
404	-0.46314	1.3334	0.290217	-0.95412	0.826902
405	-0.76824	1.15418	-0.05653	-1.22655	0.482571
406	-0.45876	1.18014	-0.31428	-1.4746	0.122291
407	-0.65388	0.970272	0.73668	-1.35603	0.05386
408	-0.47204	0.557345	0.896933	-1.1486	-0.11194
409	-0.6839	0.336724	0.261183	-0.95719	0.453798
410	-0.66832	0.751439	0.320725	-0.57534	0.771183
411	-0.73801	0.360153	0.919575	-0.41171	1.70964
412	-0.52762	0.536723	0.546311	-1.31457	1.0501
413	-0.54089	0.323889	0.292877	-1.18784	0.878344
414	0.392432	0.7499	0.416485	-1.74139	0.644323
415	0.389883	1.11145	2.31302	-1.51243	0.22339
416	0.921787	1.2249	-0.45753	-0.96889	0.274823
417	0.649941	1.14059	-0.24976	-0.76736	-0.00743
418	0.706047	1.3409	0.229888	-0.18852	0.301008
419	1.69459	1.67097	0.118251	1.80296	-0.07151
420	-0.01003	0.762834	-0.05345	2.22075	0.621647
421	-0.55614	0.451947	1.24779	1.88452	-0.08117
422	0.564006	0.839079	-0.4097	2.02241	-0.06004
423	-0.68577	0.18619	0.301126	1.58644	0.105531
424	-0.32479	0.039703	-0.28631	1.19906	-0.11243
425	-0.37329	-0.25756	-0.06331	0.877651	-0.01749
426	-0.609	-0.89362	0.142062	0.68184	-0.46278
427	-0.87383	-0.37613	0.645966	1.55336	-0.22122
428	-0.8974	-0.29401	0.784442	0.396794	0.082245
429	-0.70798	-0.49653	0.271299	0.587669	0.133291
430	-0.55005	-1.28801	0.333101	0.515544	0.025361
431	-0.32793	-1.17873	0.636729	0.367037	0.067898
432	-0.09603	-0.79788	0.465775	0.230576	0.109292
433	-0.1558	-0.85992	0.534839	0.158997	-0.08245
434	0.171274	-0.88302	0.958029	1.08139	-0.4098
435	-0.60299	-1.24895	0.785252	0.92476	-0.19686
436	-0.38875	-1.12076	0.418641	0.51478	-0.37596
437	0.182255	-0.74272	0.092341	0.497889	-0.31301
438	0.445564	-0.25978	0.307753	0.491888	0.414414
439	0.891883	0.452176	0.450639	0.156265	1.22551
440	1.21289	0.878408	-0.13136	1.513	0.85702
441	1.23241	0.701904	0.739676	2.55535	2.09972
442	1.77227	1.20898	0.335038	2.91239	2.2774
443	1.99044	1.81387	0.449624	2.27755	2.44593
444	3.04644	2.24122	0.893978	1.19663	2.22308
445	1.34208	0.851848	0.642672	0.984341	2.26593
446	1.46395	0.425248	0.319154	0.938509	1.85598
447	2.51659	1.25857	0.545231	0.713674	2.51126
448	5.03364	6.70445	7.48183	3.80324	6.09754
449	4.44562	5.14192	4.60968	0.406983	2.69485
450	3.37785	4.02249	2.07536	-1.01725	1.51051
451	1.003	1.79668	-0.19613	-1.99014	0.512037
452	0.559668	1.43261	-0.10686	-1.80029	0.026558
453	0.482744	0.966914	0.373367	-0.87658	-0.27935
454	1.1831	1.72564	0.211204	-0.75668	-0.51194
455	1.23376	1.54133	0.586971	-1.25266	-0.69878
456	-0.47337	-0.7622	0.74728	-0.81819	-0.02071
457	-0.11942	-1.19057	0.24563	-1.18058	0.104516
458	0.520662	-0.31656	0.921956	-1.08371	-0.02064
459	0.884648	0.164989	0.538462	-0.54802	-0.10598
460	0.952452	0.256402	-0.17465	-0.56085	-0.47717
461	1.23144	0.514664	0.130036	-0.43143	-0.2832
462	0.237566	-0.26448	0.239436	-0.17716	-0.56975
463	-0.41452	-1.13332	0.342175	0.355863	-0.78111
464	-0.26752	-0.98495	0.461997	1.27046	-1.11402
465	-0.0569	-0.92998	1.16441	1.25036	-0.54662
466	-0.19085	-0.71334	0.097786	1.27273	-0.05906
467	-0.28475	-0.88589	0.52094	1.9031	-0.46305
468	-0.30423	-0.94884	0.43089	0.913011	-0.08017
469	-0.30304	-0.95442	-0.34487	-0.26505	0.601104
470	-0.83077	-1.17793	-0.06888	-0.37099	0.228496
471	-0.31891	-1.10201	0.535974	-0.23202	-0.06443
472	0.724637	-0.15168	-0.23785	-0.32457	-0.18325
473	1.31992	0.688408	-0.05274	-0.29306	0.04498
474	1.42476	0.770706	-0.05696	-0.58728	-0.29891
475	1.51548	0.927157	0.475213	-0.42262	-0.10701
476	1.46584	1.06289	0.334296	-0.44461	-0.38438
477	0.262845	-0.12193	0.008691	-0.70429	-0.02738
478	-0.47335	-1.01035	-0.51958	-0.7085	-0.12058
479	-0.12731	-0.81907	-0.02423	-0.78873	-0.18432
480	-0.03786	-0.75122	-0.01791	-0.87806	-0.49377
481	-0.0137	-0.72164	-0.28882	-0.59663	-0.38675
482	-0.0318	-0.74073	-0.3922	-0.624	-0.66936
483	0.002331	-0.72386	-0.2399	-0.5675	-0.55086
484	0.129177	-0.6663	0.277746	-0.88291	-0.63637
485	-0.09678	-0.60072	-0.32542	-0.79042	-0.79738
486	-0.39007	-0.9728	-0.00481	-0.66349	-0.45858
487	-0.00709	-0.92758	0.424381	-0.72506	-0.60571
488	-0.46052	-0.97886	-0.73263	-0.60934	-0.76633
489	-0.22423	-0.73235	-0.43914	-0.64963	-0.65968
490	0.024259	-0.59199	-0.03498	-0.79552	-0.67251
491	-0.12809	-0.38253	-0.52261	-0.33317	-0.75974
492	-0.23901	-0.22313	-0.15279	-0.58346	-0.94212
493	-0.28626	-0.25872	-0.96643	-0.39774	-0.86546
494	-0.23807	-0.35014	-0.12578	-0.05398	-0.62881
495	-0.47084	-0.04043	-0.28646	-0.37082	-0.6355
496	-0.51536	0.160768	-0.01604	-0.42807	-0.91606
497	-0.39373	-0.02342	-0.7895	-0.47719	-0.83473
498	-0.26795	-0.88546	-0.07545	-0.63612	-0.96431
499	-0.39182	-0.78456	-0.68114	-0.47853	-0.82168
500	-0.3134	-0.53228	-1.22745	-0.67017	-1.02881
501	-0.16059	-0.29066	-0.56451	-0.83675	-0.90347
502	-0.04391	-0.13932	-1.0036	-0.39693	-0.58126
503	-0.16355	-0.70777	0.007358	-0.45961	-0.682
504	0.005695	-0.81731	-0.19569	-0.60741	-0.54797
505	0.096839	-0.67708	-0.14427	-0.33414	-0.48817
506	0.089344	-0.68537	-0.82053	-0.54072	-0.57155
507	0.17638	-0.62059	0.052674	-0.44043	-0.46885
508	0.112563	-0.54088	-0.32877	-0.38664	-0.16861
509	0.155763	-0.48147	-0.03691	-0.68287	-0.21146
510	-0.06881	-0.56224	-0.29019	-0.84658	-0.35144
511	-0.46312	-0.85143	-1.02033	-0.71331	-0.67082
512	-0.20106	-0.71714	0.386028	-0.60987	-0.63875
513	0.029991	-0.65257	-0.34219	-0.38816	-0.52033
514	0.140726	-0.53856	-0.12646	-0.59627	-0.41364
515	0.155605	-0.43358	-0.74357	-0.72176	-0.65534
516	0.093515	-0.42463	-0.08783	-0.45375	-0.62107
517	0.077977	-0.50272	-0.71172	-0.80481	-0.59303
518	0.072644	-0.44408	-0.11109	-0.57923	-0.83623
519	-0.45825	-0.62582	-0.21913	-0.41149	-0.74099
520	-0.41355	-0.86686	-0.11089	-0.49832	-0.65036
521	-0.19136	-0.62754	-0.15381	-0.49674	-0.86797
522	0.016221	-0.54558	-0.21252	-0.40418	-0.70962
523	0.108884	-0.51967	-0.63738	-0.3078	-0.85064
524	0.10859	-0.48183	-0.33795	-0.4432	-0.82513
525	-0.08623	-0.43495	-0.3772	-0.40005	-0.72271
526	-0.55213	-0.63522	-0.12525	-0.30931	-0.49136
527	-0.22383	-0.34116	0.14877	-0.38209	-0.93458
528	-0.10027	-0.26554	-0.60024	-0.30362	-0.42332
529	-0.07681	-0.25273	-0.16211	-0.52897	-0.90207
530	-0.13853	-0.58777	0.703535	-0.33388	-0.9842
531	0.033625	-0.71612	-0.18738	-0.40199	-0.74405
532	0.132819	-0.73533	-0.46072	-0.25696	-0.24358
533	0.247843	-0.59049	-0.40102	-0.00689	0.452636
534	0.289398	-0.38378	-0.8235	0.107019	0.419123
535	0.210807	-0.419	-0.3341	-0.15133	0.215995
536	0.137517	-0.54569	0.178762	-0.43116	0.57551
537	0.132003	-0.54313	-0.5377	-0.12671	0.651249
538	0.184783	-0.41819	-0.33763	0.264945	0.105759
539	0.101208	-0.45894	-0.1148	-0.02573	0.40959
540	-0.29207	-0.66005	-0.22111	0.047195	0.219532
541	-0.05833	-0.65152	-0.87374	0.145402	0.134998
542	0.048944	-0.6544	-0.503	-0.20701	-0.17128
543	0.114321	-0.65011	-0.51909	-0.38424	0.024609
544	0.02786	-0.72036	0.050096	-0.2886	-0.18416
545	-0.21423	-0.65842	0.228105	-0.08046	-0.07781
546	-0.52841	-0.75354	1.26285	-0.31337	-0.32247
547	-0.2163	-0.49508	-0.31672	-0.11879	-0.28498
548	-0.09636	-0.18084	0.371626	-0.62326	0.139368
549	-0.20535	-0.23235	-0.15915	-0.1878	-0.15092
550	-0.23657	-0.63757	-0.13818	0.012901	-0.11671
551	-0.4399	-0.66119	-0.18995	-0.23442	0.077696
552	-0.17603	-0.43491	0.079006	-0.05487	-0.50259
553	0.072724	-0.20965	0.41604	-0.13813	-0.46446
554	0.099721	0.012712	-0.05882	-0.40868	-0.56256
555	0.094706	-0.10834	-0.21762	0.485337	-0.36358
556	0.092053	-0.06109	-0.19582	0.083455	-0.38937
557	-0.14133	-0.29578	-0.42084	0.035614	-0.26317
558	-0.21733	-0.57176	0.322447	0.578408	-0.20645
559	-0.07151	-0.7118	0.255673	0.135815	-0.14692
560	-0.22545	-0.09195	-0.12711	-0.00071	0.17347
561	-0.26245	-0.2328	-0.10326	0.074252	0.230624
562	-0.34106	-0.10528	-0.19414	0.043124	0.083252
563	-0.19698	-0.13618	-0.37186	0.082307	-0.0973
564	-0.01744	-0.02886	-0.13521	0.05022	-0.02162
565	0.189621	-0.13448	-0.61836	0.141699	-0.12539
566	0.153513	-0.1965	0.528856	0.295	0.120531
567	0.177327	-0.01887	-0.85174	0.197626	-0.18164
568	0.204206	-0.0701	-0.2908	0.146487	-0.38239
569	0.232691	0.072247	-0.43468	0.146372	-0.37153
570	0.21329	0.010211	-0.5837	0.307046	-0.49727
571	-0.0918	-0.13285	-0.09699	0.291747	-0.18725
572	-0.19665	-0.54456	-0.22042	0.222811	-0.49017
573	-0.42479	-0.40301	-0.65076	0.015544	-0.58766
574	-0.05903	-0.40801	-0.31697	0.535771	-0.58516
575	0.066374	-0.3189	-0.05967	0.580444	-0.46145
576	0.056728	-0.16377	0.929845	0.377561	-0.77894
577	0.016937	-0.15496	0.78105	0.020655	-0.49059
578	-0.25162	-0.52247	-0.12971	0.107479	-0.55135
579	0.03188	-0.33916	0.172697	0.638258	-0.53353
580	0.171569	-0.04852	-0.4463	0.340908	-0.40857
581	0.219168	-0.09179	-0.11138	0.440528	-0.2496
582	-0.09039	-0.22258	0.23711	0.433741	-0.89586
583	-0.2504	-0.60589	0.231442	0.454906	-0.56533
584	0.053502	-0.47562	0.281519	0.223119	-0.62552
585	0.30114	-0.24202	0.044054	0.631358	-0.41657
586	0.399041	0.049126	-0.70643	0.375049	-0.50402
587	0.462114	0.245042	0.444673	0.433089	-0.38466
588	0.470475	0.24749	-0.09747	0.477781	-0.64509
589	0.426783	0.276849	-0.21748	0.599436	-0.6101
590	0.436538	0.16019	-0.21197	0.52297	-0.41593
591	0.634593	0.209452	0.070821	0.517425	-0.44253
592	0.492572	0.240985	0.176964	0.621958	-0.33185
593	-0.19911	-0.39651	-0.34784	0.448695	0.303242
594	-0.35019	-0.60975	-0.22047	0.519827	-0.0762
595	-0.2106	-0.39479	-0.21451	0.531742	1.1523
596	-0.01385	-0.18481	0.977473	0.320526	-0.27634
597	-0.08359	-0.41308	-0.48179	0.632038	-0.18759
598	-0.13712	-0.41351	-0.51895	0.644619	-0.26301
599	-0.09388	-0.45917	-0.29787	0.357066	-0.00269
