# Supplementary material for: Functionally refined encoding of threat memory by distinct populations of basal forebrain cholinergic projection neurons
Source: eLife. 2024 Feb 16;13:e86581. doi: 10.7554/eLife.86581 (PMC10928508; doi:10.7554/eLife.86581)
Supplement: Figure 1—source data 1. [file elife-86581-fig1-data1.csv]

					Naïve tone															Recall Tone
Time(s)	Mouse1	Mouse2	Mouse3	Mouse4	Mouse5	Mouse6	Mouse7	Mouse8	Mouse9	Mouse10	Mouse11				Mouse1	Mouse2	Mouse3	Mouse4	Mouse5	Mouse6	Mouse7	Mouse8	Mouse9	Mouse10	Mouse11
-4.99948	-0.89836	0.623806	0.796543	-0.401	0.190883	-0.64651	-0.68381	-0.7502	-1.63673	0.140892	-0.76198				0.443476	-0.70608	1.430884	-0.48014	-0.1589	1.463788	0.193866	-0.92226	0.655527	-0.08665	-0.38907
-4.99128	-0.9637	0.867792	0.639061	-0.46657	0.107424	-0.61817	-0.72796	-0.87939	-1.64137	0.091601	-0.68081				0.41419	-0.72242	1.55427	-0.4467	-0.15279	1.523674	0.184429	-0.8715	0.664761	-0.02345	-0.44367
-4.98308	-1.05452	1.044624	0.50514	-0.52675	0.024914	-0.63118	-0.74283	-0.96064	-1.61818	0.023475	-0.62163				0.366612	-0.77958	1.678798	-0.456	-0.14964	1.549341	0.165872	-0.77791	0.676808	0.058877	-0.47166
-4.97487	-1.11666	1.1389	0.491886	-0.53841	-0.02187	-0.66917	-0.73016	-0.97743	-1.56825	-0.06079	-0.60209				0.33277	-0.87177	1.782028	-0.51398	-0.15782	1.53231	0.143837	-0.71161	0.664265	0.134528	-0.46276
-4.96667	-1.10916	1.153653	0.611734	-0.47415	-0.01546	-0.70009	-0.71468	-0.96297	-1.47933	-0.14488	-0.6198				0.323422	-0.97524	1.804234	-0.58939	-0.1783	1.472535	0.126919	-0.72868	0.601611	0.169733	-0.4286
-4.95847	-1.04073	1.120036	0.792963	-0.33937	0.03815	-0.70004	-0.7213	-0.97479	-1.35247	-0.21856	-0.66513				0.30901	-1.03144	1.731713	-0.64901	-0.19984	1.385332	0.111739	-0.83004	0.509532	0.147705	-0.38745
-4.95027	-0.94084	1.070588	0.952683	-0.18478	0.103984	-0.67388	-0.76076	-1.02522	-1.21437	-0.29099	-0.7234				0.253561	-0.98732	1.660197	-0.67849	-0.22636	1.298864	0.082633	-0.95774	0.440148	0.075283	-0.34904
-4.94206	-0.83965	1.02747	1.056437	-0.08102	0.139576	-0.64652	-0.82586	-1.08853	-1.10565	-0.38256	-0.7703				0.145416	-0.84628	1.701459	-0.68357	-0.26397	1.238616	0.040513	-1.05826	0.419175	-0.00772	-0.32187
-4.93394	-0.76134	1.015784	1.116539	-0.06892	0.131126	-0.64489	-0.8937	-1.12359	-1.05121	-0.48066	-0.78629				0.011942	-0.65459	1.893623	-0.68196	-0.31063	1.217438	-0.00102	-1.09399	0.425142	-0.06862	-0.30419
-4.92574	-0.717	1.038258	1.156596	-0.13875	0.08802	-0.67158	-0.94762	-1.13387	-1.05755	-0.5548	-0.77645				-0.11848	-0.4775	2.146202	-0.66711	-0.34326	1.218579	-0.0352	-1.06375	0.413236	-0.10692	-0.28921
-4.91753	-0.70877	1.085124	1.205479	-0.23811	0.038832	-0.69978	-0.98051	-1.16497	-1.0842	-0.58984	-0.77331				-0.21654	-0.35613	2.331143	-0.6235	-0.32878	1.218284	-0.0652	-0.98942	0.388562	-0.15267	-0.27826
-4.90933	-0.73493	1.128622	1.25552	-0.32965	-0.0031	-0.70536	-0.99084	-1.24852	-1.07352	-0.58719	-0.79819				-0.26185	-0.29986	2.37257	-0.55591	-0.27084	1.191366	-0.09688	-0.90135	0.395676	-0.22735	-0.29071
-4.90113	-0.80341	1.137311	1.278727	-0.38898	-0.0422	-0.67896	-0.97627	-1.3851	-0.99936	-0.56483	-0.84314				-0.24915	-0.29083	2.306461	-0.4966	-0.20648	1.133247	-0.12834	-0.85535	0.459254	-0.32005	-0.33914
-4.89292	-0.90381	1.117463	1.23276	-0.4125	-0.09137	-0.63528	-0.93038	-1.52559	-0.89493	-0.538	-0.8791				-0.19765	-0.30322	2.234724	-0.47191	-0.17826	1.057261	-0.14888	-0.88629	0.565771	-0.4023	-0.40024
-4.88472	-1.0139	1.086593	1.132077	-0.40356	-0.14831	-0.59862	-0.85083	-1.61354	-0.83024	-0.5258	-0.88345				-0.15491	-0.3182	2.217581	-0.48082	-0.19727	0.972586	-0.1535	-0.98857	0.682929	-0.44389	-0.4284
-4.87652	-1.09368	1.044227	1.071034	-0.36422	-0.19137	-0.57892	-0.74923	-1.64621	-0.83505	-0.53725	-0.8532				-0.13443	-0.31111	2.239484	-0.50931	-0.23579	0.894098	-0.14433	-1.11787	0.797079	-0.44252	-0.39515
-4.86831	-1.10562	0.962362	1.13416	-0.31523	-0.20398	-0.57942	-0.65479	-1.65351	-0.88558	-0.55243	-0.79864				-0.13485	-0.27432	2.227625	-0.54307	-0.27053	0.822369	-0.13809	-1.23609	0.90217	-0.40802	-0.32062
-4.86011	-1.04758	0.83295	1.309974	-0.26746	-0.17422	-0.59643	-0.59447	-1.64225	-0.92952	-0.52904	-0.74433				-0.15177	-0.22401	2.138428	-0.58024	-0.30551	0.759224	-0.14625	-1.34944	0.988455	-0.35984	-0.23661
-4.85191	-0.92948	0.694113	1.494737	-0.22949	-0.12134	-0.62146	-0.57359	-1.58256	-0.94025	-0.40953	-0.7029				-0.16908	-0.2049	1.993703	-0.6156	-0.35502	0.705142	-0.1631	-1.46897	1.038209	-0.32078	-0.15225
-4.84379	-0.77698	0.610927	1.624893	-0.19723	-0.08665	-0.64523	-0.58043	-1.47154	-0.93023	-0.17215	-0.67315				-0.16496	-0.22843	1.846033	-0.63677	-0.40612	0.662786	-0.17464	-1.57906	1.017593	-0.29996	-0.05262
-4.83559	-0.62696	0.61769	1.702616	-0.15863	-0.10127	-0.66477	-0.59685	-1.34341	-0.91399	0.151999	-0.65183				-0.11735	-0.25773	1.755942	-0.63212	-0.43068	0.632288	-0.17257	-1.6274	0.914034	-0.30235	0.065484
-4.82738	-0.51624	0.677417	1.75818	-0.11086	-0.16319	-0.68882	-0.60796	-1.24996	-0.89294	0.496437	-0.63832				-0.05494	-0.26056	1.738097	-0.61264	-0.4204	0.597749	-0.17287	-1.5775	0.74219	-0.32195	0.172597
-4.81918	-0.4566	0.726331	1.809116	-0.0476	-0.22007	-0.71946	-0.59739	-1.22491	-0.85635	0.792635	-0.64992				-0.02695	-0.24303	1.754332	-0.60399	-0.39992	0.550489	-0.18792	-1.46206	0.538173	-0.36344	0.2295
-4.81098	-0.4154	0.712269	1.828173	0.018343	-0.21877	-0.74924	-0.55539	-1.26411	-0.80037	0.99988	-0.68966				-0.05666	-0.24984	1.712589	-0.61046	-0.39994	0.486067	-0.2211	-1.35489	0.345314	-0.43065	0.225277
-4.80277	-0.36998	0.629601	1.806045	0.073629	-0.15585	-0.76119	-0.48482	-1.32625	-0.73221	1.110786	-0.73352				-0.12105	-0.294	1.567478	-0.62343	-0.41533	0.415994	-0.26114	-1.32312	0.191127	-0.496	0.191428
-4.79457	-0.32387	0.51533	1.767902	0.115547	-0.08773	-0.74896	-0.40121	-1.3609	-0.66013	1.146503	-0.74755				-0.17725	-0.34331	1.410081	-0.62031	-0.42197	0.35923	-0.30118	-1.38439	0.082434	-0.51821	0.17203
-4.78637	-0.30214	0.420682	1.742765	0.146879	-0.07721	-0.72854	-0.3247	-1.37336	-0.57838	1.126228	-0.72333				-0.22358	-0.36713	1.367994	-0.58722	-0.40714	0.3261	-0.34324	-1.50689	0.01722	-0.47639	0.183816
-4.77816	-0.32153	0.375638	1.73377	0.183826	-0.12493	-0.72021	-0.2619	-1.39009	-0.46147	1.068841	-0.68926				-0.28933	-0.36734	1.456392	-0.53765	-0.39271	0.313195	-0.38459	-1.62356	-0.00185	-0.41231	0.216088
-4.76996	-0.36774	0.364185	1.716734	0.227805	-0.18313	-0.72828	-0.21954	-1.41898	-0.29399	0.98966	-0.67369				-0.38674	-0.37808	1.520727	-0.49947	-0.40789	0.308149	-0.41551	-1.68494	0.018297	-0.38866	0.236755
-4.76176	-0.41932	0.35015	1.692416	0.258453	-0.20786	-0.73779	-0.19919	-1.43074	-0.08046	0.91071	-0.68291				-0.48509	-0.40953	1.408444	-0.50164	-0.45023	0.300969	-0.42646	-1.68238	0.050918	-0.42688	0.229266
-4.75355	-0.46681	0.296503	1.665336	0.23971	-0.2029	-0.73783	-0.20319	-1.37033	0.149952	0.859584	-0.69483				-0.54267	-0.44924	1.15753	-0.54698	-0.48759	0.284091	-0.43425	-1.62804	0.056927	-0.49708	0.204258
-4.74543	-0.51473	0.202996	1.642391	0.163985	-0.20267	-0.72872	-0.22893	-1.22507	0.372905	0.840275	-0.67952				-0.54941	-0.48051	0.951098	-0.62848	-0.47503	0.260794	-0.45165	-1.53902	0.008426	-0.55343	0.180887
-4.73723	-0.5622	0.108158	1.625788	0.083232	-0.22428	-0.7231	-0.27072	-1.03914	0.583624	0.836546	-0.61846				-0.51805	-0.48844	0.924503	-0.72418	-0.4109	0.229445	-0.48207	-1.42901	-0.09076	-0.58108	0.172284
-4.72903	-0.60699	0.04787	1.606376	0.065192	-0.2642	-0.73102	-0.32827	-0.89261	0.772519	0.816271	-0.51062				-0.45958	-0.47933	1.04738	-0.80253	-0.32999	0.187253	-0.51612	-1.34854	-0.22288	-0.58841	0.175087
-4.72082	-0.64873	0.056688	1.592983	0.135677	-0.31238	-0.74792	-0.39603	-0.81665	0.92584	0.758937	-0.37102				-0.36316	-0.46407	1.194128	-0.84559	-0.26368	0.137222	-0.53629	-1.34551	-0.36121	-0.58719	0.175233
-4.71262	-0.67911	0.137957	1.609694	0.24964	-0.36494	-0.76398	-0.46413	-0.78199	1.024752	0.663973	-0.2182				-0.23594	-0.4517	1.264076	-0.84229	-0.22233	0.088133	-0.54618	-1.40467	-0.4872	-0.57964	0.159336
-4.70442	-0.68755	0.265547	1.684115	0.340401	-0.40756	-0.76599	-0.52198	-0.76071	1.069832	0.543084	-0.06611				-0.10771	-0.43859	1.214518	-0.79515	-0.17825	0.054056	-0.55049	-1.46483	-0.57826	-0.57531	0.135828
-4.69621	-0.66594	0.404133	1.790353	0.373062	-0.42919	-0.75532	-0.56584	-0.72613	1.076803	0.424286	0.089041				-0.01072	-0.41549	1.070439	-0.73347	-0.10395	0.038482	-0.55533	-1.47009	-0.61289	-0.59417	0.128876
-4.68801	-0.62811	0.515131	1.873924	0.370596	-0.43457	-0.74614	-0.59903	-0.68682	1.059156	0.334109	0.248889				0.020704	-0.38952	0.916041	-0.69809	-0.00273	0.034355	-0.55382	-1.44416	-0.59185	-0.637	0.155635
-4.67981	-0.60054	0.58949	1.893582	0.370991	-0.43801	-0.75165	-0.62333	-0.67385	1.018411	0.282385	0.400656				-0.01436	-0.37022	0.835004	-0.70655	0.088766	0.031932	-0.54013	-1.44544	-0.52775	-0.68163	0.209214
-4.6716	-0.5933	0.641236	1.852722	0.377184	-0.4531	-0.77735	-0.6391	-0.6965	0.940553	0.258118	0.520607				-0.09568	-0.35748	0.834302	-0.74035	0.135003	0.01744	-0.5157	-1.49411	-0.44181	-0.69014	0.257617
-4.6634	-0.58695	0.707622	1.79276	0.38594	-0.4695	-0.81044	-0.64457	-0.72182	0.823175	0.232706	0.592607				-0.18078	-0.32866	0.868148	-0.77282	0.129168	-0.0094	-0.48801	-1.54696	-0.34849	-0.64517	0.280076
-4.65528	-0.53679	0.809465	1.736377	0.390024	-0.47202	-0.83865	-0.644	-0.72089	0.680754	0.186467	0.622898				-0.24603	-0.27842	0.875811	-0.78901	0.084387	-0.0337	-0.47381	-1.54646	-0.26228	-0.55846	0.281013
-4.64708	-0.43865	0.936813	1.675088	0.403652	-0.46122	-0.85394	-0.64155	-0.71132	0.535726	0.111508	0.622578				-0.29744	-0.22818	0.829101	-0.80958	0.024524	-0.03065	-0.47194	-1.49204	-0.18955	-0.4693	0.280432
-4.63887	-0.33069	1.055922	1.567708	0.446109	-0.45668	-0.85792	-0.64009	-0.72284	0.4096	0.014373	0.597585				-0.34934	-0.21037	0.757186	-0.86336	-0.0319	0.023496	-0.46837	-1.40465	-0.11962	-0.43684	0.28116
-4.63067	-0.2677	1.129736	1.409531	0.501184	-0.47274	-0.85772	-0.64588	-0.76223	0.304995	-0.09274	0.550187				-0.42888	-0.24804	0.688132	-0.94833	-0.07541	0.129953	-0.44263	-1.30877	-0.05651	-0.48436	0.266488
-4.62247	-0.26945	1.156253	1.244565	0.533007	-0.49539	-0.86284	-0.66506	-0.79167	0.214079	-0.18705	0.487718				-0.51996	-0.33616	0.661138	-1.02193	-0.09913	0.277342	-0.39438	-1.23482	-0.02189	-0.59119	0.240988
-4.61426	-0.31119	1.160511	1.10671	0.49972	-0.51422	-0.88272	-0.70054	-0.79269	0.125078	-0.23503	0.432616				-0.58664	-0.44798	0.697749	-1.02253	-0.09791	0.463091	-0.34206	-1.20871	-0.03644	-0.70522	0.239074
-4.60606	-0.37009	1.164648	1.016041	0.395697	-0.52109	-0.90947	-0.74187	-0.80814	0.03763	-0.22824	0.400709				-0.61025	-0.52701	0.775526	-0.91988	-0.07421	0.709767	-0.30287	-1.23518	-0.09375	-0.7798	0.300582
-4.59786	-0.4186	1.160977	0.930062	0.250777	-0.51007	-0.92385	-0.78011	-0.89011	-0.03517	-0.17425	0.396894				-0.6012	-0.53283	0.829789	-0.72938	-0.04887	1.049339	-0.28089	-1.29662	-0.14985	-0.80189	0.416781
-4.58965	-0.43381	1.133442	0.795525	0.115431	-0.47944	-0.91073	-0.80941	-1.03425	-0.08114	-0.06713	0.41187				-0.59774	-0.47845	0.828895	-0.52618	-0.04427	1.491	-0.27376	-1.36024	-0.15592	-0.7768	0.528498
-4.58145	-0.40288	1.083362	0.63008	0.03961	-0.43	-0.87853	-0.83082	-1.17103	-0.10482	0.139432	0.421325				-0.61899	-0.42344	0.817682	-0.39305	-0.07018	2.018141	-0.28759	-1.37401	-0.09357	-0.71175	0.588658
-4.57325	-0.31264	1.029941	0.53344	0.037086	-0.3781	-0.85265	-0.85268	-1.25928	-0.12743	0.487841	0.407055				-0.65693	-0.42745	0.827918	-0.3583	-0.11808	2.582322	-0.31912	-1.30164	0.018276	-0.60315	0.601864
-4.56513	-0.17328	1.002655	0.601071	0.095089	-0.34813	-0.85364	-0.87808	-1.31101	-0.1592	0.967057	0.368125				-0.68384	-0.47062	0.852697	-0.39893	-0.17266	3.131781	-0.35328	-1.13484	0.152567	-0.46419	0.623088
-4.55692	-0.01629	0.987851	0.795803	0.176564	-0.36288	-0.88437	-0.90502	-1.36163	-0.19874	1.492177	0.315135				-0.67362	-0.48957	0.85106	-0.45456	-0.23072	3.638343	-0.36688	-0.92806	0.278308	-0.32394	0.690488
-4.54872	0.098951	0.94888	0.977264	0.250286	-0.41031	-0.92703	-0.92437	-1.42912	-0.23352	1.953998	0.247206				-0.61817	-0.44954	0.791719	-0.48531	-0.28066	4.129298	-0.35134	-0.78655	0.378117	-0.18052	0.788701
-4.54052	0.105454	0.870375	0.994932	0.304253	-0.455	-0.96403	-0.92932	-1.49194	-0.2599	2.295153	0.155877				-0.53428	-0.37661	0.710985	-0.48245	-0.30239	4.625757	-0.32676	-0.76231	0.466641	0.004553	0.884311
-4.53232	-0.04184	0.781834	0.818624	0.333957	-0.48089	-0.99114	-0.92219	-1.5378	-0.29391	2.51129	0.050144				-0.45567	-0.31295	0.652649	-0.45234	-0.26865	5.127672	-0.32208	-0.80844	0.58219	0.274555	0.965113
-4.52411	-0.32659	0.748926	0.570365	0.352017	-0.51274	-1.01373	-0.90986	-1.54434	-0.34389	2.625714	-0.03348				-0.39782	-0.25632	0.630635	-0.41689	-0.18541	5.59141	-0.34772	-0.82468	0.759673	0.625065	1.042327
-4.51591	-0.65329	0.7913	0.405352	0.380257	-0.58955	-1.03067	-0.89758	-1.4964	-0.40985	2.661602	-0.06146				-0.37718	-0.19561	0.643678	-0.39827	-0.09993	5.931586	-0.38986	-0.78434	0.983908	0.990811	1.118242
-4.5077	-0.91242	0.864303	0.385385	0.438972	-0.71391	-1.02135	-0.87741	-1.41763	-0.48213	2.647416	-0.04693				-0.39888	-0.14689	0.691585	-0.4114	-0.04878	6.087196	-0.42351	-0.7429	1.216923	1.288755	1.178548
-4.4995	-1.03087	0.894413	0.449344	0.517799	-0.84402	-0.97168	-0.84099	-1.36403	-0.54668	2.60486	-0.03326				-0.45012	-0.14975	0.768894	-0.42837	-0.0354	6.057445	-0.4347	-0.74227	1.41293	1.493335	1.209331
-4.4913	-1.01802	0.832362	0.490451	0.591135	-0.91768	-0.89275	-0.80191	-1.39229	-0.58991	2.529763	-0.06122				-0.51108	-0.21709	0.858641	-0.40917	-0.03294	5.91413	-0.42267	-0.76331	1.55216	1.619283	1.217148
-4.4831	-0.93344	0.691108	0.4343	0.63102	-0.90596	-0.82381	-0.7866	-1.48929	-0.60393	2.425835	-0.12725				-0.55102	-0.30477	0.946984	-0.35439	-0.03114	5.754957	-0.39995	-0.73665	1.640726	1.692856	1.222836
-4.47497	-0.8454	0.517636	0.322136	0.63024	-0.83462	-0.80486	-0.81229	-1.59334	-0.61229	2.316889	-0.19124				-0.54489	-0.34176	1.013658	-0.31402	-0.04531	5.643474	-0.38667	-0.64722	1.678867	1.728054	1.234114
-4.46677	-0.79984	0.372615	0.260013	0.61325	-0.74679	-0.83779	-0.86415	-1.64609	-0.63957	2.228573	-0.2154				-0.45895	-0.29553	1.046403	-0.34218	-0.08807	5.608073	-0.39496	-0.5534	1.675523	1.729237	1.242448
-4.45857	-0.8086	0.300071	0.290056	0.597107	-0.67807	-0.89946	-0.90998	-1.62723	-0.69199	2.169457	-0.18471				-0.28537	-0.20909	1.042936	-0.43338	-0.13924	5.633934	-0.42343	-0.51421	1.64661	1.716452	1.235808
-4.45037	-0.86586	0.32093	0.359416	0.593331	-0.63755	-0.96391	-0.93053	-1.56195	-0.74898	2.117693	-0.1161				-0.05225	-0.15331	0.990654	-0.54338	-0.16376	5.697662	-0.45828	-0.54993	1.602956	1.717943	1.212666
-4.44216	-0.93765	0.421364	0.367455	0.603175	-0.61326	-1.01571	-0.92911	-1.48127	-0.78516	2.048489	-0.02805				0.169796	-0.17704	0.888882	-0.61915	-0.15969	5.762994	-0.4867	-0.6395	1.536825	1.738055	1.17973
-4.43396	-0.99986	0.551598	0.289948	0.610456	-0.5771	-1.04958	-0.92161	-1.40862	-0.80639	1.946783	0.069693				0.30742	-0.2738	0.776778	-0.65043	-0.15798	5.790363	-0.51034	-0.76451	1.423074	1.759703	1.14611
-4.42576	-1.04064	0.659279	0.195684	0.596712	-0.50073	-1.06707	-0.91792	-1.35286	-0.8367	1.82523	0.172198				0.360072	-0.38828	0.749618	-0.65776	-0.19286	5.762252	-0.53065	-0.88955	1.26029	1.755539	1.114946
-4.41755	-1.07084	0.717201	0.165595	0.549555	-0.38834	-1.0816	-0.92422	-1.31374	-0.8886	1.702624	0.272328				0.391636	-0.47263	0.874215	-0.66784	-0.26584	5.683044	-0.54704	-0.95706	1.076014	1.723799	1.079828
-4.40935	-1.12123	0.742059	0.211655	0.490252	-0.26397	-1.10096	-0.93909	-1.27483	-0.93373	1.594862	0.35354				0.459579	-0.51676	1.127523	-0.70042	-0.34377	5.567809	-0.55145	-0.93392	0.893621	1.684091	1.042366
-4.40115	-1.18648	0.763246	0.252452	0.441746	-0.16669	-1.12284	-0.96194	-1.2247	-0.93658	1.510742	0.401286				0.562729	-0.54474	1.373883	-0.74615	-0.39847	5.41457	-0.54497	-0.84336	0.72531	1.658024	1.005007
-4.39294	-1.23006	0.794237	0.225665	0.420412	-0.12048	-1.13698	-0.98696	-1.17342	-0.87719	1.448614	0.412514				0.642051	-0.56565	1.474774	-0.78774	-0.42062	5.220762	-0.53325	-0.7392	0.565198	1.643572	0.966051
-4.38482	-1.21957	0.824511	0.122467	0.430072	-0.11769	-1.14483	-1.0052	-1.13799	-0.75931	1.396535	0.396637				0.654805	-0.56626	1.423537	-0.8011	-0.41524	4.995711	-0.52953	-0.65378	0.41362	1.603936	0.914161
-4.37662	-1.15648	0.839808	-0.02349	0.453381	-0.13505	-1.16482	-1.01751	-1.15916	-0.61233	1.331691	0.36741				0.601037	-0.54722	1.314927	-0.77504	-0.38551	4.770533	-0.53556	-0.57662	0.282352	1.517134	0.838676
-4.36842	-1.07777	0.855078	-0.16579	0.473271	-0.15126	-1.20737	-1.02989	-1.26093	-0.47202	1.242658	0.331126				0.536364	-0.51518	1.245612	-0.72802	-0.33975	4.562265	-0.53612	-0.48757	0.178549	1.396781	0.75367
-4.36021	-1.01822	0.882001	-0.27374	0.479734	-0.15931	-1.25403	-1.05308	-1.41949	-0.367	1.126603	0.294275				0.525143	-0.50006	1.224562	-0.68548	-0.29293	4.372295	-0.51788	-0.40531	0.0837	1.27584	0.692617
-4.35201	-0.99356	0.913795	-0.30897	0.469303	-0.1651	-1.26691	-1.08897	-1.56915	-0.3046	0.994856	0.258044				0.589614	-0.50871	1.190055	-0.68037	-0.25129	4.183197	-0.47697	-0.37921	-0.02559	1.180449	0.681285
-4.34381	-0.98495	0.913967	-0.26601	0.442623	-0.18421	-1.23268	-1.13339	-1.65639	-0.28522	0.882779	0.220687				0.70103	-0.51114	1.11836	-0.72104	-0.22315	3.983949	-0.43469	-0.43371	-0.16443	1.109575	0.711633
-4.3356	-0.97142	0.855398	-0.18486	0.40399	-0.2243	-1.17015	-1.17258	-1.6848	-0.31155	0.818961	0.185658				0.813539	-0.47507	1.032865	-0.78573	-0.20264	3.789774	-0.40312	-0.55211	-0.32485	1.046245	0.748602
-4.3274	-0.95921	0.75568	-0.1257	0.364721	-0.27808	-1.11098	-1.18672	-1.68703	-0.38245	0.803868	0.163125				0.90036	-0.40205	0.961802	-0.83936	-0.18827	3.623625	-0.37907	-0.67091	-0.47156	0.976104	0.771866
-4.3192	-0.97653	0.645615	-0.12389	0.336673	-0.32716	-1.0692	-1.17106	-1.68691	-0.49258	0.810056	0.153317				0.94098	-0.34543	0.896257	-0.85861	-0.18783	3.497288	-0.35152	-0.74137	-0.5734	0.89576	0.803572
-4.31099	-1.04241	0.55101	-0.16193	0.325442	-0.35044	-1.02922	-1.13341	-1.67021	-0.61117	0.803098	0.139581				0.917197	-0.35079	0.836792	-0.8594	-0.20631	3.398074	-0.30911	-0.75567	-0.61187	0.814566	0.899749
-4.30279	-1.12933	0.467367	-0.20706	0.321021	-0.34601	-0.97952	-1.09265	-1.61151	-0.70981	0.767645	0.103092				0.806773	-0.42897	0.804763	-0.86638	-0.24436	3.298477	-0.26354	-0.73517	-0.61197	0.750647	1.098947
-4.29467	-1.18865	0.381348	-0.2333	0.314597	-0.31854	-0.91985	-1.06358	-1.52239	-0.77595	0.707654	0.04201				0.62614	-0.53997	0.806579	-0.89435	-0.29569	3.181422	-0.22859	-0.71593	-0.61248	0.719502	1.381945
-4.28647	-1.18708	0.293575	-0.23751	0.302124	-0.2708	-0.86097	-1.05086	-1.41009	-0.81625	0.648058	-0.02464				0.456365	-0.62263	0.839379	-0.92964	-0.35194	3.045987	-0.21964	-0.71754	-0.6251	0.709534	1.672858
-4.27826	-1.14995	0.214829	-0.23399	0.29387	-0.21424	-0.80972	-1.05195	-1.25658	-0.84863	0.601759	-0.07989				0.385411	-0.64579	0.887823	-0.94242	-0.39298	2.902625	-0.22334	-0.76011	-0.62743	0.688735	1.906062
-4.27006	-1.12749	0.170416	-0.24507	0.302336	-0.16221	-0.76591	-1.058	-1.03757	-0.8738	0.568725	-0.12292				0.445224	-0.61868	0.941316	-0.92167	-0.40028	2.771804	-0.20909	-0.8619	-0.57713	0.625941	2.053849
-4.26186	-1.13754	0.165829	-0.2825	0.315252	-0.13067	-0.73701	-1.06034	-0.77823	-0.89082	0.545451	-0.15701				0.576228	-0.57682	0.973703	-0.88506	-0.38577	2.662209	-0.15654	-1.02862	-0.46638	0.524079	2.137444
-4.25365	-1.15737	0.187587	-0.33245	0.313913	-0.11873	-0.72432	-1.04154	-0.54548	-0.90805	0.529286	-0.18811				0.693609	-0.5428	0.944356	-0.86094	-0.37204	2.571253	-0.0703	-1.22239	-0.32142	0.407282	2.196574
-4.24545	-1.15394	0.220124	-0.39336	0.271341	-0.12477	-0.72801	-0.99205	-0.4123	-0.9458	0.516778	-0.21769				0.740307	-0.51265	0.822387	-0.85669	-0.37067	2.485448	0.014097	-1.35472	-0.17838	0.305426	2.258736
-4.23725	-1.13681	0.242978	-0.45168	0.188199	-0.14345	-0.74475	-0.91508	-0.39642	-1.02246	0.483211	-0.25713				0.696891	-0.46032	0.648397	-0.86431	-0.36869	2.386707	0.068236	-1.37463	-0.07028	0.241344	2.340754
-4.22904	-1.13223	0.236198	-0.50546	0.106406	-0.16462	-0.76917	-0.82755	-0.46492	-1.12861	0.398394	-0.31184				0.588384	-0.35737	0.51992	-0.87255	-0.35601	2.27104	0.094114	-1.30236	-0.00207	0.216964	2.445015
-4.22084	-1.15491	0.200646	-0.54468	0.073543	-0.17508	-0.7978	-0.74793	-0.57786	-1.22667	0.259361	-0.36513				0.428365	-0.20119	0.486666	-0.88237	-0.33947	2.149093	0.125597	-1.21182	0.023893	0.220905	2.561014
-4.21264	-1.20168	0.153081	-0.53539	0.104846	-0.15958	-0.82024	-0.68557	-0.69277	-1.27351	0.105879	-0.38963				0.243559	-0.01321	0.538976	-0.898	-0.33147	2.036633	0.185315	-1.17235	0.002997	0.233932	2.688565
-4.20443	-1.25045	0.102483	-0.46795	0.149258	-0.13199	-0.82924	-0.641	-0.77085	-1.26848	-0.00567	-0.37232				0.081881	0.153441	0.621334	-0.90858	-0.33394	1.927631	0.266373	-1.20371	-0.07506	0.253639	2.835254
-4.19631	-1.29337	0.061223	-0.35302	0.151743	-0.12045	-0.82603	-0.60421	-0.79447	-1.25189	-0.05679	-0.33919				-0.0131	0.260061	0.681541	-0.91367	-0.32843	1.802677	0.341487	-1.28143	-0.20351	0.30408	3.01461
-4.18811	-1.32512	0.048068	-0.22179	0.103892	-0.1481	-0.81924	-0.56819	-0.7714	-1.26551	-0.07076	-0.33177				-0.02949	0.299306	0.690429	-0.91371	-0.31249	1.659909	0.38419	-1.36464	-0.3441	0.399085	3.235125
-4.17991	-1.34502	0.077357	-0.09063	0.042943	-0.21319	-0.81096	-0.52548	-0.73488	-1.3151	-0.07698	-0.37016				0.001883	0.292863	0.640734	-0.90819	-0.2982	1.524352	0.39393	-1.41881	-0.45572	0.534812	3.487438
-4.1717	-1.361	0.152813	0.008081	0.016176	-0.29116	-0.79654	-0.47112	-0.70646	-1.37576	-0.0764	-0.44428				0.048434	0.270955	0.565929	-0.89282	-0.30758	1.427425	0.382223	-1.41803	-0.51549	0.684199	3.779669
-4.1635	-1.37775	0.244446	0.029838	0.022889	-0.36631	-0.77872	-0.41227	-0.68964	-1.42515	-0.06704	-0.52255				0.075409	0.238245	0.510317	-0.8634	-0.34495	1.370756	0.366432	-1.37431	-0.53274	0.817193	4.125322
-4.1553	-1.4046	0.306989	-0.01499	0.04616	-0.4285	-0.76689	-0.35991	-0.6827	-1.45255	-0.06494	-0.57631				0.06862	0.20391	0.522796	-0.83186	-0.39112	1.330124	0.348711	-1.33888	-0.53098	0.902767	4.516503
-4.1471	-1.42861	0.305339	-0.06663	0.071597	-0.47074	-0.77512	-0.32797	-0.70555	-1.45859	-0.08741	-0.58704				0.03674	0.176707	0.609708	-0.80108	-0.42722	1.276131	0.317386	-1.3557	-0.5276	0.910198	4.901468
-4.13889	-1.43861	0.252755	-0.05498	0.09612	-0.48922	-0.80084	-0.32697	-0.8028	-1.43683	-0.13694	-0.56214				0.016814	0.165739	0.706761	-0.77187	-0.43388	1.204618	0.264907	-1.42404	-0.5242	0.83439	5.223247
-4.13069	-1.4417	0.185505	0.023049	0.11233	-0.4898	-0.82375	-0.35534	-0.96563	-1.38845	-0.18425	-0.52967				0.04919	0.177395	0.735915	-0.74853	-0.41474	1.135917	0.197294	-1.50614	-0.52659	0.710527	5.466254
-4.12249	-1.46235	0.118981	0.099537	0.096697	-0.48637	-0.81726	-0.40003	-1.14016	-1.33858	-0.20751	-0.52994				0.120144	0.20793	0.654506	-0.73635	-0.38728	1.089177	0.135152	-1.58217	-0.55401	0.595357	5.648594
-4.11428	-1.50841	0.055134	0.114906	0.039157	-0.48752	-0.77303	-0.44297	-1.26895	-1.31495	-0.20551	-0.58194				0.17495	0.264421	0.524089	-0.74134	-0.36424	1.066843	0.097075	-1.64576	-0.60887	0.515529	5.795615
-4.10616	-1.5611	-0.02222	0.082718	-0.03688	-0.49418	-0.71545	-0.47743	-1.32648	-1.32738	-0.19419	-0.66406				0.171285	0.354787	0.471312	-0.74892	-0.35059	1.03746	0.086957	-1.6865	-0.68186	0.46069	5.917267
-4.09796	-1.59661	-0.11459	0.060745	-0.07473	-0.49657	-0.68408	-0.50417	-1.32203	-1.34842	-0.19548	-0.743				0.11887	0.473118	0.566892	-0.74555	-0.3423	0.97421	0.096271	-1.69057	-0.74753	0.421001	6.030254
-4.08975	-1.59014	-0.19056	0.083227	-0.04798	-0.48158	-0.70806	-0.52463	-1.26198	-1.35274	-0.21797	-0.79701				0.041657	0.588696	0.748532	-0.73358	-0.34132	0.87385	0.110412	-1.64014	-0.77888	0.414851	6.162403
-4.08155	-1.54559	-0.2245	0.148529	0.030267	-0.44179	-0.77835	-0.53868	-1.16254	-1.34508	-0.26602	-0.82781				-0.04777	0.670324	0.86951	-0.72292	-0.34289	0.765096	0.117164	-1.56017	-0.76062	0.462402	6.329593
-4.07335	-1.48982	-0.22726	0.214864	0.11572	-0.38801	-0.8539	-0.54301	-1.06642	-1.34422	-0.31648	-0.84815				-0.12861	0.713865	0.833958	-0.72162	-0.35108	0.683548	0.117866	-1.48062	-0.68022	0.542871	6.515067
-4.06515	-1.46033	-0.24505	0.243333	0.162656	-0.3536	-0.90244	-0.538	-1.04879	-1.37152	-0.33142	-0.86656				-0.17643	0.727751	0.655703	-0.73202	-0.37795	0.630338	0.126263	-1.40692	-0.5444	0.607195	6.683781
-4.05694	-1.47704	-0.3081	0.234044	0.16333	-0.36998	-0.91999	-0.52697	-1.14879	-1.42331	-0.29551	-0.8828				-0.17041	0.717004	0.432815	-0.76672	-0.42212	0.59152	0.168547	-1.33382	-0.36948	0.607672	6.820437
-4.04874	-1.51706	-0.40777	0.207087	0.12855	-0.44659	-0.92801	-0.51213	-1.30774	-1.48274	-0.23543	-0.8859				-0.14733	0.667489	0.257009	-0.82401	-0.47552	0.549769	0.253805	-1.27304	-0.18788	0.539472	6.922369
-4.04054	-1.54268	-0.50928	0.187213	0.087605	-0.54181	-0.94154	-0.49093	-1.42086	-1.52511	-0.20501	-0.87122				-0.18611	0.573497	0.169492	-0.87836	-0.52436	0.50889	0.362738	-1.24425	-0.04143	0.440153	6.983677
-4.03233	-1.52382	-0.56946	0.146183	0.062832	-0.60205	-0.96013	-0.46323	-1.41199	-1.5311	-0.22897	-0.84042				-0.31345	0.459149	0.173812	-0.89398	-0.56313	0.479512	0.459683	-1.22914	0.057249	0.366913	6.981582
-4.02413	-1.47843	-0.58077	0.035748	0.063593	-0.61229	-0.9795	-0.43746	-1.28723	-1.50526	-0.28896	-0.80163				-0.48017	0.366672	0.252166	-0.87236	-0.59506	0.458029	0.512613	-1.19747	0.118364	0.362462	6.90514
-4.01601	-1.4474	-0.56812	-0.16633	0.098691	-0.60379	-0.99393	-0.42083	-1.1171	-1.47315	-0.35438	-0.77101				-0.59811	0.319507	0.392751	-0.8569	-0.62601	0.431427	0.522532	-1.13497	0.153413	0.423269	6.785836
-4.00781	-1.45135	-0.57453	-0.4001	0.154305	-0.6189	-0.99979	-0.41865	-0.97895	-1.4642	-0.42387	-0.7536				-0.63268	0.290972	0.555486	-0.88937	-0.6461	0.383715	0.498221	-1.05815	0.149027	0.528138	6.66014
-3.9996	-1.49168	-0.62548	-0.56048	0.215303	-0.65859	-0.99765	-0.43075	-0.89618	-1.47949	-0.51352	-0.75512				-0.60533	0.249855	0.694928	-0.97432	-0.6456	0.311918	0.451634	-1.0145	0.081874	0.656492	6.543385
-3.9914	-1.54146	-0.71165	-0.61798	0.275848	-0.68698	-0.9949	-0.45841	-0.84149	-1.49523	-0.61414	-0.77889				-0.55185	0.180966	0.770022	-1.06292	-0.63444	0.233146	0.387146	-1.03242	-0.04229	0.789904	6.414487
-3.9832	-1.57692	-0.7831	-0.59466	0.354511	-0.67531	-1.00302	-0.49907	-0.78107	-1.48766	-0.69882	-0.8236				-0.50646	0.094509	0.770655	-1.08935	-0.61909	0.172713	0.312954	-1.10349	-0.1696	0.91331	6.250519
-3.97499	-1.59127	-0.79236	-0.533	0.473993	-0.62722	-1.02404	-0.53926	-0.69824	-1.45745	-0.75261	-0.88231				-0.47671	0.004923	0.732696	-1.02292	-0.59986	0.136066	0.24528	-1.19172	-0.22204	0.991883	6.055847
-3.96679	-1.59788	-0.74549	-0.45369	0.603444	-0.56457	-1.04858	-0.56291	-0.62055	-1.43269	-0.79324	-0.94151				-0.46627	-0.07808	0.671002	-0.89451	-0.57223	0.101385	0.204805	-1.26498	-0.16939	0.997086	5.848041
-3.95859	-1.60929	-0.68796	-0.34401	0.674623	-0.49338	-1.06199	-0.55943	-0.58313	-1.43109	-0.84471	-0.9899				-0.47998	-0.13837	0.585975	-0.78125	-0.54423	0.047649	0.195455	-1.30947	-0.04709	0.931997	5.643819
-3.95038	-1.61403	-0.67059	-0.21611	0.64697	-0.41399	-1.06913	-0.54537	-0.60008	-1.44281	-0.91016	-1.02079				-0.51792	-0.17995	0.453632	-0.72899	-0.5344	-0.0228	0.184747	-1.34403	0.079041	0.826612	5.444445
-3.94218	-1.59834	-0.69731	-0.09078	0.563617	-0.3318	-1.08695	-0.53981	-0.6596	-1.44081	-0.97912	-1.03218				-0.56416	-0.20544	0.257807	-0.7319	-0.55046	-0.08594	0.148448	-1.38923	0.170742	0.726737	5.253034
-3.93398	-1.56076	-0.73003	0.026351	0.512087	-0.26087	-1.1234	-0.54526	-0.73993	-1.4092	-1.03596	-1.02808				-0.57828	-0.21167	0.056301	-0.7481	-0.58346	-0.12897	0.085978	-1.42186	0.23185	0.668224	5.07581
-3.92586	-1.52248	-0.7394	0.158574	0.535839	-0.21531	-1.1597	-0.55055	-0.84666	-1.35221	-1.07803	-1.01621				-0.52661	-0.20613	-0.0686	-0.75517	-0.60281	-0.15824	0.02254	-1.41148	0.269536	0.664074	4.910139
-3.91765	-1.51378	-0.72099	0.284393	0.612277	-0.19179	-1.17291	-0.54651	-0.97216	-1.28108	-1.09778	-1.00594				-0.40912	-0.1843	-0.06997	-0.77157	-0.58734	-0.18801	-0.01841	-1.35368	0.270305	0.6868	4.74913
-3.90945	-1.55005	-0.70414	0.322769	0.682261	-0.19085	-1.15707	-0.54288	-1.09612	-1.21415	-1.09263	-1.0032				-0.28776	-0.14124	0.004307	-0.81406	-0.54974	-0.22428	-0.03579	-1.29203	0.203517	0.692657	4.580217
-3.90125	-1.62702	-0.70875	0.228798	0.71655	-0.22	-1.11956	-0.55136	-1.19891	-1.16106	-1.07079	-1.00581				-0.23519	-0.07805	0.078672	-0.87523	-0.51576	-0.26199	-0.03987	-1.27727	0.077901	0.650883	4.404273
-3.89304	-1.72361	-0.73757	0.032369	0.712043	-0.28721	-1.08355	-0.58103	-1.26344	-1.13852	-1.04047	-1.00439				-0.27436	-0.0162	0.107702	-0.9204	-0.51425	-0.30597	-0.05266	-1.32136	-0.05619	0.573441	4.227733
-3.88484	-1.8174	-0.77525	-0.16633	0.676424	-0.37532	-1.06589	-0.62365	-1.27752	-1.1638	-1.0044	-0.99602				-0.36298	0.002372	0.084217	-0.92927	-0.5416	-0.35753	-0.0723	-1.40352	-0.14396	0.505928	4.055583
-3.87664	-1.8829	-0.79898	-0.28388	0.60148	-0.45321	-1.07104	-0.6655	-1.21626	-1.235	-0.95484	-0.98109				-0.42511	-0.06038	0.036089	-0.9148	-0.57641	-0.40552	-0.09102	-1.47951	-0.16153	0.481338	3.889965
-3.86843	-1.92319	-0.80294	-0.29102	0.491119	-0.49273	-1.09358	-0.7042	-1.07277	-1.33129	-0.90384	-0.95993				-0.43238	-0.19273	-0.00186	-0.89785	-0.60338	-0.43383	-0.09652	-1.53559	-0.12512	0.492228	3.730118
-3.86023	-1.95348	-0.77471	-0.24882	0.38044	-0.48159	-1.1165	-0.74548	-0.86481	-1.40667	-0.8769	-0.92943				-0.39983	-0.31608	0.019469	-0.88426	-0.62614	-0.43501	-0.07704	-1.57344	-0.05056	0.499169	3.573147
-3.85203	-1.96933	-0.71373	-0.24009	0.29883	-0.43609	-1.12978	-0.79357	-0.63723	-1.42703	-0.87761	-0.88313				-0.37483	-0.36975	0.127391	-0.86527	-0.66248	-0.43126	-0.03647	-1.5906	0.040341	0.480887	3.415243
-3.84383	-1.95738	-0.64037	-0.28544	0.264213	-0.3807	-1.13514	-0.84075	-0.44004	-1.38934	-0.89037	-0.8295				-0.38663	-0.33434	0.287237	-0.83803	-0.7168	-0.45076	0.00467	-1.58365	0.132727	0.444709	3.265561
-3.8357	-1.90136	-0.59336	-0.36979	0.261593	-0.3469	-1.14876	-0.87072	-0.28722	-1.32502	-0.88857	-0.79141				-0.42621	-0.23843	0.412632	-0.80357	-0.78552	-0.50359	0.015941	-1.55102	0.221377	0.412556	3.132255
-3.8275	-1.82134	-0.60629	-0.45005	0.275165	-0.35156	-1.176	-0.8638	-0.18103	-1.27595	-0.86281	-0.797				-0.47238	-0.1268	0.45615	-0.77923	-0.84709	-0.57354	-0.00701	-1.51608	0.298848	0.398889	3.0196
-3.8193	-1.75527	-0.6745	-0.5124	0.31582	-0.38255	-1.20399	-0.81719	-0.1352	-1.26318	-0.82611	-0.8526				-0.50331	-0.03892	0.460814	-0.78616	-0.88144	-0.63015	-0.03972	-1.49651	0.369302	0.391255	2.921856
-3.81109	-1.72613	-0.75438	-0.57335	0.394194	-0.4141	-1.22264	-0.74727	-0.17398	-1.28804	-0.80585	-0.93365				-0.52483	0.000362	0.473307	-0.82618	-0.86933	-0.65898	-0.04584	-1.47732	0.437056	0.374417	2.817321
-3.80289	-1.72232	-0.78789	-0.6406	0.5052	-0.42412	-1.22822	-0.67338	-0.28252	-1.33341	-0.82189	-1.0113				-0.53824	-0.01106	0.501773	-0.8847	-0.80151	-0.66924	-0.01641	-1.4228	0.504076	0.328232	2.691455
-3.79469	-1.7152	-0.76036	-0.7073	0.620213	-0.40992	-1.22857	-0.60723	-0.40679	-1.3744	-0.86987	-1.05868				-0.54113	-0.06086	0.52464	-0.931	-0.6978	-0.67422	0.023657	-1.32053	0.566961	0.241286	2.550024
-3.78648	-1.71846	-0.70403	-0.74085	0.721617	-0.3683	-1.22997	-0.54405	-0.4806	-1.38899	-0.927	-1.06372				-0.53618	-0.11852	0.537903	-0.95212	-0.59851	-0.66734	0.045073	-1.22497	0.620961	0.128168	2.417513
-3.77828	-1.75143	-0.66695	-0.73338	0.799393	-0.28983	-1.23624	-0.47514	-0.45092	-1.37436	-0.95939	-1.03318				-0.52336	-0.15638	0.546956	-0.95648	-0.5378	-0.63585	0.042393	-1.19794	0.667504	0.022581	2.311352
-3.77008	-1.80665	-0.67202	-0.67982	0.843314	-0.17319	-1.25215	-0.3982	-0.3405	-1.34397	-0.95341	-0.98734				-0.51179	-0.15462	0.52768	-0.97147	-0.50656	-0.59237	0.03685	-1.24584	0.722707	-0.03321	2.220863
-3.76188	-1.85588	-0.7136	-0.58796	0.860786	-0.03366	-1.27843	-0.32363	-0.22489	-1.31298	-0.92147	-0.95561				-0.50523	-0.09742	0.476622	-1.01124	-0.4782	-0.56685	0.043203	-1.3124	0.812764	-0.02639	2.12412
-3.75367	-1.87184	-0.78496	-0.50874	0.85963	0.092392	-1.30412	-0.2726	-0.1792	-1.28465	-0.87294	-0.95345				-0.51122	-0.00661	0.429871	-1.05399	-0.43943	-0.58438	0.062062	-1.35183	0.957996	0.013319	2.005036
-3.74555	-1.85629	-0.8667	-0.48858	0.849844	0.18298	-1.31459	-0.25701	-0.2117	-1.24846	-0.80237	-0.97646				-0.54377	0.07552	0.452573	-1.07647	-0.3967	-0.6387	0.078103	-1.35791	1.16656	0.04383	1.877666
-3.73735	-1.82266	-0.92955	-0.53792	0.827605	0.237197	-1.31081	-0.27415	-0.26823	-1.2017	-0.71721	-1.0058				-0.60864	0.119427	0.553945	-1.06012	-0.36536	-0.70087	0.077069	-1.36134	1.405438	0.051994	1.768415
-3.72914	-1.78249	-0.94549	-0.59049	0.787768	0.268029	-1.30166	-0.31046	-0.31847	-1.14648	-0.65217	-1.03085				-0.69175	0.133121	0.661702	-1.01069	-0.34025	-0.7474	0.060981	-1.39151	1.604376	0.062864	1.677179
-3.72094	-1.72729	-0.91701	-0.58025	0.745292	0.289904	-1.29594	-0.3511	-0.38018	-1.08624	-0.6259	-1.05332				-0.75769	0.151679	0.709279	-0.95164	-0.31392	-0.7797	0.038259	-1.42647	1.696524	0.094428	1.594985
-3.71274	-1.66073	-0.89354	-0.50009	0.739907	0.309222	-1.29268	-0.38938	-0.50184	-1.03535	-0.63064	-1.07064				-0.78445	0.184453	0.701711	-0.90106	-0.28681	-0.81122	0.016971	-1.4384	1.667205	0.132874	1.512855
-3.70453	-1.603	-0.90761	-0.40156	0.78719	0.326197	-1.28563	-0.42192	-0.68598	-1.00962	-0.63605	-1.06537				-0.78136	0.211198	0.694296	-0.86911	-0.27457	-0.84221	0.004614	-1.41551	1.579059	0.141502	1.436305
-3.69633	-1.56126	-0.95339	-0.34315	0.849401	0.33567	-1.27623	-0.44975	-0.87092	-1.03086	-0.62766	-1.02188				-0.7875	0.20314	0.707022	-0.84657	-0.29684	-0.87461	0.00136	-1.367	1.517503	0.101324	1.370867
-3.68813	-1.52686	-0.98655	-0.35461	0.875918	0.342118	-1.25764	-0.47703	-0.99632	-1.0971	-0.632	-0.9572				-0.82149	0.167859	0.692837	-0.82665	-0.35652	-0.90534	0.000863	-1.32033	1.530998	0.033771	1.315805
-3.67993	-1.47876	-0.97777	-0.44151	0.843959	0.349302	-1.21706	-0.5077	-1.02063	-1.17417	-0.68124	-0.9099				-0.85597	0.138931	0.605939	-0.80965	-0.45507	-0.93245	-0.00636	-1.29637	1.601907	-0.01694	1.261489
-3.67172	-1.41136	-0.9473	-0.57321	0.782913	0.361887	-1.14911	-0.54563	-0.96075	-1.21162	-0.78745	-0.9054				-0.8468	0.143822	0.454815	-0.80416	-0.57533	-0.94994	-0.02387	-1.3117	1.677755	-0.01936	1.191023
-3.66352	-1.33009	-0.92599	-0.70706	0.748056	0.381132	-1.06783	-0.58655	-0.87565	-1.17503	-0.92532	-0.93541				-0.75916	0.201341	0.307916	-0.82004	-0.68293	-0.94907	-0.04767	-1.35299	1.725025	0.013279	1.090017
-3.65532	-1.25207	-0.93766	-0.79538	0.764911	0.400085	-1.00603	-0.62274	-0.84572	-1.07591	-1.05297	-0.96525				-0.60567	0.302436	0.23761	-0.8476	-0.7489	-0.93621	-0.0828	-1.38454	1.72597	0.039889	0.95819
-3.6472	-1.19263	-0.98489	-0.81973	0.815854	0.409784	-0.99226	-0.64802	-0.91812	-0.94547	-1.13708	-0.97872				-0.42193	0.414599	0.282339	-0.86677	-0.75859	-0.92145	-0.13462	-1.36875	1.69346	0.026509	0.819069
-3.63899	-1.1501	-1.06084	-0.78898	0.850461	0.396438	-1.03541	-0.66447	-1.04955	-0.80757	-1.16455	-0.98554				-0.24883	0.496201	0.412549	-0.8545	-0.72397	-0.92448	-0.20184	-1.29554	1.663085	-0.0144	0.694389
-3.63079	-1.13479	-1.15068	-0.6915	0.838787	0.361223	-1.10941	-0.68161	-1.1588	-0.67003	-1.15419	-1.0102				-0.1115	0.54633	0.549818	-0.80089	-0.67941	-0.95048	-0.26667	-1.20075	1.665533	-0.04033	0.605199
-3.62259	-1.14852	-1.23667	-0.53138	0.779754	0.320108	-1.16865	-0.70626	-1.21077	-0.53868	-1.12539	-1.05013				-0.0128	0.60395	0.627952	-0.70603	-0.65963	-0.98512	-0.3056	-1.1107	1.708284	-0.03584	0.554677
-3.61438	-1.18904	-1.30442	-0.35194	0.697065	0.296078	-1.18342	-0.74316	-1.24356	-0.44054	-1.08146	-1.07438				0.039345	0.70499	0.609612	-0.59163	-0.66243	-1.01353	-0.31413	-1.01786	1.772694	-0.01634	0.523557
-3.60618	-1.24791	-1.32934	-0.23317	0.632956	0.311432	-1.15818	-0.78682	-1.27886	-0.40568	-1.01817	-1.05815				0.050193	0.839832	0.521461	-0.49572	-0.65949	-1.03035	-0.30423	-0.9129	1.848367	-0.0127	0.487496
-3.59798	-1.30557	-1.28251	-0.2335	0.606382	0.358148	-1.13079	-0.83267	-1.28874	-0.43981	-0.95024	-1.00163				0.028147	0.95317	0.412742	-0.45417	-0.63321	-1.05353	-0.29658	-0.82075	1.936206	-0.0222	0.429172
-3.58977	-1.35635	-1.13417	-0.30603	0.616534	0.407781	-1.13198	-0.87532	-1.22867	-0.51307	-0.9119	-0.93414				-0.01154	1.023299	0.334786	-0.49649	-0.59663	-1.10027	-0.2904	-0.78699	2.023122	-0.01	0.353003
-3.58157	-1.39452	-0.89824	-0.35422	0.635653	0.428067	-1.15486	-0.91273	-1.10821	-0.57851	-0.92199	-0.87816				-0.04582	1.074512	0.313337	-0.61256	-0.58263	-1.16386	-0.26825	-0.82611	2.060129	0.054517	0.270575
-3.57337	-1.411	-0.64992	-0.31563	0.629075	0.411354	-1.16964	-0.94386	-1.00981	-0.62014	-0.97042	-0.83668				-0.0768	1.137353	0.326641	-0.76772	-0.60088	-1.20975	-0.21537	-0.91142	1.982203	0.195427	0.191105
-3.56516	-1.38881	-0.46934	-0.23259	0.593312	0.376907	-1.16226	-0.97383	-0.98068	-0.66766	-1.03041	-0.79977				-0.12734	1.203609	0.333837	-0.91926	-0.63601	-1.21343	-0.14479	-0.99577	1.769511	0.436447	0.1179
-3.55704	-1.3286	-0.38385	-0.19494	0.546135	0.343536	-1.15056	-1.01803	-0.97021	-0.76527	-1.08568	-0.76163				-0.23279	1.231528	0.309168	-1.03412	-0.67057	-1.18648	-0.08562	-1.06189	1.475137	0.811095	0.046843
-3.54884	-1.25929	-0.35384	-0.23822	0.499874	0.320401	-1.16016	-1.07743	-0.87458	-0.9144	-1.12756	-0.73541				-0.38741	1.210704	0.299688	-1.10173	-0.69235	-1.15536	-0.06629	-1.1285	1.199112	1.328483	-0.01781
-3.54064	-1.20737	-0.33989	-0.33961	0.447506	0.299542	-1.19992	-1.13742	-0.66592	-1.07509	-1.15147	-0.72584				-0.54269	1.152497	0.363707	-1.118	-0.68829	-1.14031	-0.10058	-1.2173	1.016788	1.958891	-0.07122
-3.53243	-1.19099	-0.32649	-0.4358	0.392075	0.273831	-1.25281	-1.17106	-0.42683	-1.19879	-1.16413	-0.71957				-0.65077	1.071474	0.506905	-1.09218	-0.64201	-1.1412	-0.17276	-1.31373	0.948691	2.640301	-0.11611
-3.52423	-1.2142	-0.32025	-0.48131	0.353259	0.241069	-1.29343	-1.16318	-0.22882	-1.27359	-1.17582	-0.6975				-0.68475	0.970333	0.667425	-1.04186	-0.5753	-1.15198	-0.26489	-1.35535	0.966405	3.286088	-0.15556
-3.51603	-1.27299	-0.32982	-0.46346	0.338022	0.19467	-1.30641	-1.13181	-0.07723	-1.31942	-1.20027	-0.65364				-0.64055	0.863043	0.729462	-0.99019	-0.5335	-1.16505	-0.35186	-1.28535	1.021475	3.81949	-0.18991
-3.50782	-1.35608	-0.35563	-0.39822	0.332281	0.123826	-1.29456	-1.1072	0.090047	-1.34725	-1.23518	-0.59165				-0.50746	0.798862	0.636138	-0.95524	-0.55464	-1.17553	-0.41338	-1.08295	1.083472	4.190197	-0.20977
-3.49962	-1.43537	-0.40887	-0.32557	0.30799	0.030217	-1.27578	-1.11126	0.300493	-1.35832	-1.27084	-0.52201				-0.29778	0.806075	0.441979	-0.92208	-0.6251	-1.17979	-0.44924	-0.80181	1.140081	4.39449	-0.20966
-3.49142	-1.47951	-0.48443	-0.28081	0.262181	-0.06729	-1.25912	-1.13585	0.500584	-1.34454	-1.29802	-0.46619				-0.042	0.868531	0.252194	-0.86447	-0.67672	-1.17408	-0.46515	-0.52528	1.196132	4.474409	-0.19625
-3.48322	-1.4788	-0.56143	-0.27483	0.218116	-0.15243	-1.25133	-1.15937	0.62445	-1.3121	-1.31325	-0.44456				0.221884	0.93151	0.136801	-0.76868	-0.66275	-1.17116	-0.47316	-0.30382	1.251384	4.478429	-0.18678
-3.47501	-1.46006	-0.62093	-0.28894	0.209495	-0.21189	-1.25763	-1.16384	0.657764	-1.2766	-1.32432	-0.46561				0.476935	0.94279	0.086748	-0.64946	-0.58593	-1.18388	-0.46923	-0.15308	1.296521	4.430851	-0.18899
-3.46689	-1.43414	-0.65497	-0.32489	0.25358	-0.2398	-1.28286	-1.1474	0.652831	-1.25557	-1.32866	-0.5088				0.717471	0.894432	0.039708	-0.53381	-0.49017	-1.21126	-0.45852	-0.0605	1.323713	4.326394	-0.18903
-3.45869	-1.3946	-0.66983	-0.40382	0.357247	-0.24315	-1.31975	-1.12453	0.651707	-1.27027	-1.32534	-0.53991				0.902514	0.812583	-0.05048	-0.43979	-0.42539	-1.24153	-0.45106	-0.00984	1.318956	4.170059	-0.16016
-3.45048	-1.3418	-0.6672	-0.53206	0.510739	-0.23607	-1.34329	-1.10845	0.658532	-1.31749	-1.31717	-0.54191				0.99388	0.732441	-0.14193	-0.38467	-0.41247	-1.26281	-0.45456	0.006456	1.286307	3.978898	-0.08974
-3.44228	-1.30493	-0.64501	-0.67081	0.671994	-0.23785	-1.34171	-1.10249	0.655481	-1.36066	-1.30083	-0.52362				0.986234	0.669957	-0.15445	-0.37271	-0.44118	-1.27288	-0.46228	-0.00751	1.23912	3.781168	-0.00649
-3.43408	-1.33302	-0.61427	-0.74336	0.793258	-0.24613	-1.3188	-1.10071	0.624684	-1.34652	-1.27052	-0.51424				0.930323	0.627427	-0.06561	-0.3904	-0.48102	-1.27011	-0.45118	-0.05582	1.198811	3.595654	0.047883
-3.42587	-1.42676	-0.60819	-0.71212	0.84839	-0.24718	-1.29563	-1.09429	0.564983	-1.25359	-1.21531	-0.52721				0.88358	0.60093	0.06201	-0.38952	-0.50774	-1.25248	-0.41962	-0.1299	1.187974	3.423704	0.056276
-3.41767	-1.5378	-0.64798	-0.58998	0.828038	-0.23411	-1.28587	-1.07357	0.481956	-1.1235	-1.14011	-0.55448				0.866394	0.598525	0.144603	-0.34228	-0.51701	-1.22859	-0.38548	-0.22294	1.212907	3.262982	0.034964
-3.40947	-1.61035	-0.71363	-0.44918	0.744926	-0.21844	-1.28048	-1.0323	0.374501	-1.01512	-1.0533	-0.58285				0.883501	0.619112	0.176371	-0.28157	-0.53178	-1.21355	-0.37119	-0.31268	1.275037	3.107765	0.005041
-3.40126	-1.63488	-0.76923	-0.37853	0.625848	-0.22356	-1.27035	-0.97278	0.238031	-0.97997	-0.97666	-0.60489				0.928237	0.635311	0.213051	-0.26108	-0.5773	-1.21639	-0.37171	-0.37878	1.371662	2.957475	-0.03154
-3.39306	-1.65129	-0.78418	-0.43596	0.533768	-0.24737	-1.25514	-0.90931	0.091239	-1.02975	-0.94489	-0.62144				0.994816	0.624591	0.288324	-0.28712	-0.6508	-1.21616	-0.36437	-0.39803	1.509213	2.815415	-0.07767
-3.38486	-1.67162	-0.76661	-0.62986	0.534259	-0.27312	-1.24537	-0.87397	-0.04109	-1.14207	-0.98245	-0.63305				1.067631	0.57905	0.339533	-0.29619	-0.71326	-1.17957	-0.33435	-0.34733	1.678951	2.687022	-0.13425
-3.37674	-1.67485	-0.7537	-0.85752	0.661399	-0.29008	-1.25057	-0.88904	-0.13859	-1.26812	-1.08199	-0.65098				1.126	0.512464	0.294226	-0.22709	-0.72574	-1.09692	-0.29148	-0.23607	1.84375	2.580971	-0.1894
-3.36854	-1.6309	-0.78372	-0.98057	0.871073	-0.31507	-1.27418	-0.94577	-0.18157	-1.35584	-1.1962	-0.68531				1.169992	0.446346	0.18574	-0.07948	-0.68809	-0.9964	-0.26207	-0.12383	1.95541	2.490489	-0.22482
-3.36033	-1.54466	-0.86874	-0.92052	1.054857	-0.37069	-1.30247	-1.00843	-0.18588	-1.37839	-1.27451	-0.73273				1.192602	0.38255	0.112132	0.074034	-0.63169	-0.91878	-0.26152	-0.07881	1.981336	2.414811	-0.23651
-3.35213	-1.45515	-0.99171	-0.72742	1.142959	-0.44808	-1.31421	-1.04548	-0.18392	-1.34058	-1.29693	-0.78012				1.169721	0.310154	0.156903	0.153413	-0.58557	-0.88764	-0.29033	-0.09606	1.927811	2.348272	-0.22488
-3.34393	-1.38634	-1.13029	-0.56048	1.116953	-0.51384	-1.29425	-1.05443	-0.19597	-1.27577	-1.28825	-0.80457				1.070416	0.214906	0.303128	0.131252	-0.55137	-0.89653	-0.33115	-0.08531	1.825051	2.2703	-0.20212
-3.33572	-1.3489	-1.2452	-0.53939	1.011138	-0.53697	-1.25073	-1.04588	-0.2064	-1.2116	-1.28293	-0.79923				0.92835	0.111516	0.468629	0.027	-0.51196	-0.92634	-0.36489	0.06505	1.703268	2.15332	-0.18715
-3.32752	-1.34929	-1.31822	-0.66106	0.882255	-0.51657	-1.22125	-1.0304	-0.16469	-1.16292	-1.28305	-0.7822				0.841258	0.015808	0.581022	-0.10058	-0.46517	-0.9606	-0.37725	0.381829	1.575966	1.993938	-0.19445
-3.31932	-1.39686	-1.36183	-0.8114	0.781883	-0.48178	-1.23394	-1.0106	-0.05352	-1.13263	-1.27346	-0.77861				0.88031	-0.06713	0.597959	-0.18955	-0.42046	-0.98111	-0.36069	0.753153	1.453359	1.834106	-0.21982
-3.31111	-1.47625	-1.39695	-0.87568	0.737654	-0.47193	-1.276	-0.98368	0.106893	-1.11958	-1.24616	-0.79073				1.018554	-0.12784	0.534821	-0.21004	-0.38972	-0.97913	-0.33117	1.043522	1.344533	1.720694	-0.23854
-3.30291	-1.5446	-1.44439	-0.80049	0.747622	-0.51169	-1.30473	-0.95266	0.266255	-1.11451	-1.20929	-0.80626				1.143649	-0.16792	0.429789	-0.16549	-0.36073	-0.96838	-0.31881	1.205225	1.253056	1.664802	-0.23216
-3.29471	-1.56321	-1.50511	-0.59789	0.79399	-0.59206	-1.28917	-0.92022	0.405498	-1.08865	-1.16882	-0.81454				1.16706	-0.19941	0.323848	-0.09247	-0.31719	-0.96742	-0.34462	1.301852	1.188919	1.62782	-0.19937
-3.28659	-1.53634	-1.56295	-0.32685	0.850047	-0.67774	-1.24148	-0.88836	0.54286	-1.02251	-1.12606	-0.81131				1.089655	-0.24881	0.234748	-0.02625	-0.25908	-0.99207	-0.40695	1.387209	1.159026	1.575242	-0.16064
-3.27838	-1.51637	-1.58775	-0.04707	0.903147	-0.73126	-1.19448	-0.85631	0.673485	-0.92587	-1.0948	-0.80111				0.989155	-0.32471	0.151165	0.015248	-0.18908	-1.0301	-0.48058	1.432796	1.168638	1.51414	-0.14237
-3.27018	-1.53694	-1.55516	0.18226	0.947578	-0.73421	-1.1704	-0.8206	0.775006	-0.84409	-1.07417	-0.78591				0.938352	-0.39944	0.091288	0.035569	-0.10045	-1.05503	-0.53755	1.396824	1.209528	1.465275	-0.16069
-3.26198	-1.59695	-1.48172	0.333832	0.993454	-0.69947	-1.15517	-0.78624	0.821379	-0.83233	-1.04952	-0.77122				0.949201	-0.42792	0.102694	0.03895	0.019641	-1.05116	-0.57919	1.287752	1.251923	1.429279	-0.21605
-3.25377	-1.66456	-1.41125	0.396557	1.057207	-0.65484	-1.11542	-0.76551	0.810134	-0.89619	-0.99874	-0.76213				0.991568	-0.37603	0.211964	0.011231	0.161253	-1.02417	-0.62616	1.184112	1.268831	1.38344	-0.29516
-3.24557	-1.70572	-1.39957	0.382129	1.123242	-0.62785	-1.03406	-0.77714	0.755487	-1.00028	-0.91573	-0.75301				1.006341	-0.26472	0.367862	-0.05995	0.278997	-1.00191	-0.68876	1.136829	1.243262	1.316613	-0.37664
-3.23737	-1.71245	-1.46084	0.328	1.159776	-0.62407	-0.91823	-0.82314	0.680232	-1.10197	-0.82043	-0.7353				0.970909	-0.15386	0.49854	-0.16439	0.331575	-0.99797	-0.74317	1.098474	1.178992	1.22483	-0.43405
-3.22916	-1.69875	-1.55675	0.276802	1.145781	-0.6368	-0.79596	-0.88323	0.607694	-1.18383	-0.72426	-0.70665				0.902627	-0.09885	0.564938	-0.26102	0.312774	-1.01109	-0.7628	0.989517	1.091055	1.109804	-0.45258
-3.22096	-1.70396	-1.63944	0.285335	1.112802	-0.6472	-0.69603	-0.9284	0.544407	-1.24911	-0.62948	-0.68384				0.82291	-0.11731	0.572836	-0.31689	0.25107	-1.02571	-0.74737	0.782216	0.99473	0.98368	-0.42996
-3.21276	-1.74113	-1.68203	0.363736	1.111318	-0.64174	-0.62824	-0.94007	0.474786	-1.29389	-0.53517	-0.68445				0.742348	-0.18926	0.552501	-0.32525	0.178625	-1.03004	-0.71907	0.528756	0.922653	0.870523	-0.38332
-3.20455	-1.79169	-1.69371	0.479279	1.149518	-0.62422	-0.58849	-0.92784	0.362398	-1.31549	-0.45383	-0.70127				0.635567	-0.26907	0.518063	-0.3018	0.123695	-1.02871	-0.70245	0.30156	0.890172	0.792506	-0.34145
-3.19635	-1.81978	-1.69485	0.566877	1.186745	-0.61024	-0.56373	-0.91737	0.192013	-1.31362	-0.40128	-0.71067				0.498395	-0.31723	0.479539	-0.26242	0.109628	-1.02682	-0.70268	0.15226	0.890389	0.729548	-0.31344
-3.18823	-1.80122	-1.70399	0.586443	1.159458	-0.62357	-0.5395	-0.93065	-0.00642	-1.29577	-0.38279	-0.68438				0.369702	-0.34715	0.427009	-0.20047	0.138031	-1.03014	-0.71147	0.072709	0.899203	0.646033	-0.2941
-3.18003	-1.76279	-1.7138	0.585703	1.064325	-0.66577	-0.49532	-0.96388	-0.18677	-1.26719	-0.4015	-0.61636				0.299425	-0.39057	0.358726	-0.11517	0.184198	-1.03972	-0.71665	0.01554	0.892236	0.535073	-0.27412
-3.17182	-1.7338	-1.72141	0.612783	0.943379	-0.71855	-0.40835	-0.99901	-0.31847	-1.22702	-0.45571	-0.51631				0.309078	-0.46417	0.294501	-0.02588	0.213497	-1.05674	-0.71382	-0.03549	0.860517	0.419877	-0.26058
-3.16362	-1.72552	-1.74262	0.670276	0.835397	-0.75801	-0.27311	-1.02199	-0.39618	-1.17096	-0.53678	-0.40069				0.369623	-0.54892	0.251602	0.018637	0.226995	-1.07814	-0.70208	-0.07062	0.813037	0.338644	-0.27759
-3.15542	-1.7247	-1.7921	0.695243	0.757495	-0.76667	-0.10559	-1.03141	-0.43343	-1.10045	-0.62086	-0.2973				0.443115	-0.61181	0.256831	-0.01477	0.259301	-1.09301	-0.68589	-0.08909	0.764444	0.299746	-0.33555
-3.14721	-1.71117	-1.8646	0.619464	0.713844	-0.74559	0.062029	-1.03863	-0.45992	-1.03428	-0.68469	-0.234				0.485167	-0.65873	0.307861	-0.10913	0.337922	-1.09095	-0.67341	-0.12527	0.71001	0.291556	-0.41437
-3.13901	-1.68128	-1.92935	0.474233	0.715722	-0.71182	0.208119	-1.04271	-0.4992	-1.00068	-0.73009	-0.22597				0.477408	-0.70307	0.397896	-0.21821	0.437555	-1.06812	-0.66416	-0.21366	0.642095	0.294517	-0.46578
-3.13081	-1.64419	-1.97616	0.364601	0.753912	-0.68476	0.324004	-1.03727	-0.54622	-1.02221	-0.76962	-0.25426				0.450479	-0.74037	0.521104	-0.29515	0.496515	-1.03204	-0.65635	-0.34764	0.569605	0.286772	-0.46579
-3.1226	-1.6308	-2.01432	0.361437	0.798343	-0.67128	0.410845	-1.017	-0.56143	-1.08737	-0.80954	-0.28536				0.463617	-0.73127	0.64504	-0.34324	0.489194	-0.99103	-0.638	-0.46856	0.526854	0.2439	-0.43583
-3.1144	-1.66433	-2.03962	0.407759	0.815613	-0.67239	0.466962	-0.98722	-0.48131	-1.16223	-0.84302	-0.29363				0.547866	-0.64846	0.742932	-0.3844	0.43592	-0.95361	-0.61106	-0.51988	0.538145	0.15634	-0.41774
-3.1062	-1.73703	-2.02995	0.389968	0.801946	-0.69186	0.490681	-0.96532	-0.30137	-1.22196	-0.87576	-0.28025				0.653915	-0.52949	0.79604	-0.41879	0.378381	-0.91657	-0.57807	-0.52377	0.582946	0.047098	-0.44194
-3.09808	-1.81203	-1.9646	0.275259	0.791331	-0.73219	0.482695	-0.95755	-0.08947	-1.25748	-0.91485	-0.26219				0.704165	-0.44835	0.817833	-0.43332	0.345378	-0.87358	-0.54096	-0.53533	0.616945	-0.05364	-0.50105
-3.08987	-1.85656	-1.87803	0.129534	0.810691	-0.78496	0.440741	-0.96367	0.070607	-1.27918	-0.96712	-0.25226				0.661493	-0.46044	0.802314	-0.42051	0.337218	-0.83276	-0.5067	-0.58555	0.604416	-0.12989	-0.56174
-3.08167	-1.87106	-1.81364	0.045485	0.859948	-0.82239	0.365386	-0.97676	0.15075	-1.29232	-1.04051	-0.26072				0.55629	-0.55429	0.745188	-0.40708	0.348392	-0.80873	-0.47481	-0.65796	0.559531	-0.17314	-0.58722
-3.07347	-1.87468	-1.76937	0.02774	0.912162	-0.81627	0.259236	-0.99488	0.184643	-1.30503	-1.13529	-0.29255				0.423177	-0.68037	0.688311	-0.44175	0.365444	-0.81866	-0.44537	-0.71198	0.519208	-0.17283	-0.57206
-3.06527	-1.88926	-1.71106	0.01214	0.959724	-0.761	0.146368	-1.01091	0.205541	-1.33029	-1.24828	-0.34882				0.270308	-0.78566	0.700528	-0.54899	0.378146	-0.86051	-0.39848	-0.74296	0.491224	-0.12996	-0.5452
-3.05706	-1.91475	-1.62875	-0.05168	1.006717	-0.68861	0.059313	-1.01737	0.216074	-1.36667	-1.34853	-0.42327				0.109375	-0.8295	0.8131	-0.70208	0.371635	-0.91217	-0.32355	-0.77273	0.465375	-0.0704	-0.53901
-3.04886	-1.9483	-1.56809	-0.13338	1.037703	-0.64157	0.009768	-1.01583	0.194029	-1.40004	-1.39609	-0.50421				-0.01692	-0.81421	0.944865	-0.84398	0.341817	-0.94622	-0.23381	-0.83477	0.436217	-0.03149	-0.56492
-3.04065	-1.98269	-1.56944	-0.18721	1.034023	-0.63542	-0.01325	-1.01256	0.125877	-1.41331	-1.37769	-0.57586				-0.0613	-0.77421	0.973139	-0.92476	0.310549	-0.93963	-0.15867	-0.92005	0.411892	-0.04319	-0.60452
-3.03245	-1.99574	-1.62127	-0.23404	0.99957	-0.6611	-0.04228	-1.01821	0.033631	-1.4066	-1.32436	-0.62452				-0.04311	-0.74227	0.848143	-0.92144	0.296269	-0.89567	-0.11904	-0.98161	0.383532	-0.10386	-0.63178
-3.02425	-1.98097	-1.67337	-0.30153	0.987531	-0.691	-0.09894	-1.03497	-0.03704	-1.39136	-1.28382	-0.6513				-0.02639	-0.71716	0.644228	-0.84719	0.291734	-0.83934	-0.10036	-0.99286	0.322109	-0.18614	-0.63479
-3.01605	-1.94058	-1.68113	-0.39564	1.036412	-0.71218	-0.18873	-1.05601	-0.04839	-1.37043	-1.27402	-0.67496				-0.04569	-0.66796	0.471092	-0.73472	0.263544	-0.79876	-0.07714	-0.96413	0.212066	-0.26696	-0.62879
-3.00792	-1.89065	-1.64113	-0.49816	1.135783	-0.72489	-0.30554	-1.07017	-0.01668	-1.34379	-1.28905	-0.71899				-0.09307	-0.56995	0.364793	-0.6291	0.198442	-0.78716	-0.03489	-0.933	0.064749	-0.32488	-0.63253
-2.99972	-1.83984	-1.57628	-0.6002	1.23525	-0.72571	-0.43191	-1.06991	-0.00208	-1.31279	-1.31592	-0.78959				-0.12952	-0.43399	0.310998	-0.57288	0.111526	-0.7975	0.015132	-0.91842	-0.08261	-0.35565	-0.64499
-2.99152	-1.79604	-1.5117	-0.68409	1.283005	-0.71048	-0.54455	-1.05107	-0.06315	-1.29243	-1.34345	-0.85731				-0.14693	-0.31339	0.290429	-0.58009	0.035655	-0.81404	0.056775	-0.90521	-0.2113	-0.36753	-0.66183
-2.98332	-1.78539	-1.46131	-0.71334	1.281714	-0.67898	-0.60788	-1.0123	-0.20731	-1.29321	-1.36105	-0.89174				-0.16075	-0.24785	0.301518	-0.63615	-0.00507	-0.82024	0.083032	-0.88163	-0.32447	-0.37872	-0.66907
-2.97511	-1.82304	-1.44569	-0.6745	1.256575	-0.64814	-0.61286	-0.95859	-0.39464	-1.30717	-1.36101	-0.88616				-0.19567	-0.24579	0.327907	-0.69918	-0.0093	-0.81096	0.097475	-0.8739	-0.42446	-0.38985	-0.65309
-2.96691	-1.90307	-1.47283	-0.5624	1.210314	-0.63878	-0.58323	-0.89043	-0.57074	-1.31358	-1.34957	-0.86349				-0.26565	-0.27731	0.325472	-0.74988	0.013656	-0.79905	0.109879	-0.91818	-0.50757	-0.37514	-0.61194
-2.95871	-1.97964	-1.53167	-0.41289	1.128039	-0.65338	-0.56222	-0.80748	-0.6936	-1.29703	-1.32221	-0.84978				-0.33907	-0.30332	0.283921	-0.79476	0.04808	-0.80425	0.124209	-0.99551	-0.57578	-0.32218	-0.56083
-2.9505	-2.00707	-1.60465	-0.29559	1.008518	-0.66817	-0.56992	-0.71797	-0.76594	-1.26017	-1.24363	-0.85471				-0.36525	-0.30405	0.24021	-0.84655	0.085496	-0.84633	0.137852	-1.03991	-0.6359	-0.24978	-0.52716
-2.9423	-1.9812	-1.66517	-0.26263	0.88449	-0.64701	-0.59253	-0.63756	-0.7987	-1.22307	-1.06807	-0.87328				-0.31316	-0.28376	0.260091	-0.90595	0.115982	-0.922	0.129737	-0.99557	-0.67882	-0.20153	-0.52516
-2.9341	-1.92088	-1.69107	-0.33157	0.784531	-0.58619	-0.61093	-0.58309	-0.81298	-1.20565	-0.78954	-0.8862				-0.207	-0.2813	0.342959	-0.94755	0.129395	-1.00271	0.084861	-0.88776	-0.69022	-0.21373	-0.55629
-2.92589	-1.84515	-1.67001	-0.45258	0.70898	-0.51578	-0.62129	-0.5528	-0.83668	-1.20686	-0.46313	-0.86692				-0.10813	-0.31762	0.421382	-0.95676	0.127952	-1.05542	0.005597	-0.80214	-0.66936	-0.28828	-0.60474
-2.91777	-1.76198	-1.61574	-0.53465	0.636318	-0.47495	-0.63561	-0.53256	-0.86357	-1.21283	-0.1605	-0.7956				-0.0679	-0.36634	0.444235	-0.93204	0.119934	-1.07606	-0.08998	-0.79787	-0.64065	-0.40524	-0.65305
-2.90957	-1.68863	-1.55331	-0.50683	0.552897	-0.47982	-0.66243	-0.51261	-0.87529	-1.21366	0.068932	-0.68455				-0.09832	-0.37648	0.411545	-0.88934	0.119536	-1.08501	-0.16318	-0.86772	-0.6223	-0.52999	-0.6971
-2.90137	-1.64825	-1.50005	-0.39871	0.484232	-0.51412	-0.69826	-0.49644	-0.86053	-1.21785	0.217804	-0.58136				-0.17557	-0.31717	0.378015	-0.84531	0.119742	-1.1036	-0.18203	-0.95396	-0.59545	-0.62787	-0.72223
-2.89316	-1.65521	-1.47762	-0.31086	0.462878	-0.55548	-0.72838	-0.49533	-0.83615	-1.24807	0.289935	-0.53413				-0.28536	-0.21895	0.380918	-0.79929	0.093642	-1.14318	-0.14718	-1.0233	-0.53036	-0.66407	-0.71167
-2.88496	-1.70044	-1.48144	-0.28425	0.50337	-0.59705	-0.73396	-0.50889	-0.81833	-1.30491	0.290586	-0.54545				-0.39501	-0.13446	0.427229	-0.75195	0.027786	-1.18437	-0.08643	-1.0783	-0.41307	-0.62708	-0.66032
-2.87676	-1.75095	-1.49621	-0.27113	0.567528	-0.64375	-0.71638	-0.52872	-0.8146	-1.37073	0.231134	-0.56626				-0.4461	-0.09359	0.511156	-0.69959	-0.06358	-1.20453	-0.03239	-1.13368	-0.26768	-0.54035	-0.5934
-2.86855	-1.76813	-1.51315	-0.21189	0.604398	-0.68594	-0.68767	-0.54926	-0.85289	-1.42318	0.129126	-0.55576				-0.39794	-0.08542	0.60631	-0.64262	-0.14317	-1.19222	-0.00255	-1.20842	-0.13031	-0.44393	-0.5485
-2.86035	-1.72184	-1.52983	-0.1267	0.595893	-0.7054	-0.6672	-0.57048	-0.94843	-1.45562	0.009783	-0.52063				-0.28408	-0.09363	0.664522	-0.58368	-0.1917	-1.15891	0.005649	-1.29371	-0.0225	-0.35597	-0.5447
-2.85215	-1.6125	-1.56401	-0.08	0.579972	-0.68667	-0.66233	-0.59481	-1.08178	-1.47583	-0.11241	-0.50231				-0.18695	-0.13778	0.643403	-0.52805	-0.21209	-1.12477	0.006028	-1.37137	0.032477	-0.25825	-0.57489
-2.84394	-1.4727	-1.63175	-0.11806	0.603425	-0.63699	-0.65925	-0.61519	-1.19101	-1.48935	-0.22994	-0.5353				-0.13243	-0.23539	0.559105	-0.49853	-0.21192	-1.10066	0.016356	-1.41955	0.022851	-0.14121	-0.62032
-2.83574	-1.35545	-1.73816	-0.227	0.65718	-0.59676	-0.65154	-0.62626	-1.21744	-1.49727	-0.33154	-0.61158				-0.08934	-0.36534	0.484011	-0.5216	-0.20162	-1.10397	0.040954	-1.44441	-0.05579	-0.01198	-0.66937
-2.82762	-1.31013	-1.85196	-0.35688	0.692962	-0.59769	-0.64609	-0.62904	-1.15802	-1.4944	-0.40904	-0.7014				-0.01483	-0.45892	0.486226	-0.60302	-0.19518	-1.14077	0.074763	-1.47447	-0.17648	0.103748	-0.71115
-2.81942	-1.33613	-1.92403	-0.48861	0.659261	-0.64393	-0.65424	-0.6277	-1.0559	-1.48245	-0.44896	-0.77494				0.082581	-0.47028	0.550643	-0.70927	-0.21918	-1.2056	0.093689	-1.50194	-0.29384	0.1871	-0.73691
-2.81121	-1.39658	-1.92584	-0.59897	0.56276	-0.70951	-0.66922	-0.6256	-0.96379	-1.4701	-0.44926	-0.82575				0.159196	-0.39917	0.595138	-0.79509	-0.27258	-1.27771	0.071428	-1.48833	-0.38229	0.245155	-0.7444
-2.80301	-1.43355	-1.86853	-0.65921	0.449663	-0.76008	-0.6727	-0.62056	-0.89742	-1.45921	-0.42025	-0.85618				0.199376	-0.27569	0.552514	-0.83861	-0.31672	-1.32789	0.00426	-1.39676	-0.42796	0.290197	-0.74139
-2.79481	-1.41849	-1.80213	-0.63947	0.360232	-0.77922	-0.6625	-0.61229	-0.85153	-1.45552	-0.38664	-0.86541				0.207574	-0.13189	0.431522	-0.84145	-0.30497	-1.34723	-0.08694	-1.23742	-0.42668	0.33969	-0.75065
-2.7866	-1.377	-1.77646	-0.54172	0.325982	-0.77225	-0.6554	-0.60763	-0.8149	-1.47046	-0.37789	-0.85896				0.193805	0.018773	0.325829	-0.8295	-0.22896	-1.34147	-0.1625	-1.05389	-0.37672	0.401706	-0.77838
-2.7784	-1.36101	-1.81487	-0.40482	0.352989	-0.76289	-0.67183	-0.62006	-0.78524	-1.51571	-0.41408	-0.84323				0.138819	0.156617	0.297569	-0.82277	-0.12856	-1.32746	-0.19972	-0.86511	-0.27682	0.491548	-0.81267
-2.7702	-1.40377	-1.88583	-0.26007	0.425757	-0.76476	-0.71369	-0.65186	-0.75978	-1.58443	-0.50283	-0.83136				0.018268	0.258042	0.335956	-0.84079	-0.05853	-1.31122	-0.20302	-0.6537	-0.1276	0.631261	-0.82986
-2.76199	-1.47729	-1.92844	-0.15426	0.501559	-0.78592	-0.76892	-0.69759	-0.7394	-1.65145	-0.62339	-0.83758				-0.1376	0.302004	0.396933	-0.88575	-0.05156	-1.29224	-0.19484	-0.40608	0.075431	0.830671	-0.81922
-2.75379	-1.52927	-1.89684	-0.10465	0.543034	-0.83113	-0.82766	-0.7519	-0.73458	-1.68875	-0.74914	-0.8666				-0.27201	0.303794	0.423157	-0.94038	-0.09345	-1.27407	-0.1812	-0.16228	0.342669	1.071515	-0.7964
-2.74559	-1.53655	-1.7995	-0.08242	0.549131	-0.88289	-0.88583	-0.80515	-0.73352	-1.69317	-0.85562	-0.90795				-0.33815	0.294405	0.415934	-0.96571	-0.15244	-1.26999	-0.14535	0.021753	0.679334	1.304109	-0.78322
-2.73747	-1.51283	-1.69981	-0.05568	0.527681	-0.91388	-0.93471	-0.84996	-0.73668	-1.70168	-0.93114	-0.93965				-0.331	0.268615	0.392145	-0.92486	-0.20252	-1.28969	-0.07459	0.099732	1.039839	1.477204	-0.79411
-2.72926	-1.49195	-1.64535	-0.01448	0.495723	-0.89782	-0.95648	-0.87701	-0.76514	-1.74734	-0.9705	-0.95				-0.27801	0.200772	0.3456	-0.83523	-0.23386	-1.32647	0.024882	0.085986	1.33462	1.55843	-0.81642
-2.72106	-1.48309	-1.64189	0.005921	0.466249	-0.83314	-0.94843	-0.8887	-0.83082	-1.82505	-0.97514	-0.94209				-0.2156	0.059624	0.255634	-0.74732	-0.25961	-1.37141	0.108121	0.039068	1.473388	1.553829	-0.82789
-2.71286	-1.47563	-1.65869	-0.00835	0.453015	-0.74996	-0.92314	-0.89012	-0.90737	-1.88142	-0.96212	-0.92932				-0.16359	-0.14359	0.157948	-0.70495	-0.29514	-1.41136	0.143176	0.017517	1.425565	1.506441	-0.82114
-2.70465	-1.45692	-1.65616	-0.04637	0.457301	-0.69143	-0.9077	-0.88241	-0.92818	-1.85739	-0.94466	-0.91904				-0.12143	-0.33274	0.13222	-0.7185	-0.36461	-1.44511	0.121084	0.046893	1.238799	1.45213	-0.8051
-2.69645	-1.43081	-1.60657	-0.09098	0.463456	-0.68089	-0.92072	-0.86537	-0.86471	-1.73514	-0.92925	-0.90903				-0.09945	-0.43251	0.200132	-0.76352	-0.472	-1.47182	0.059419	0.092708	1.008225	1.407958	-0.79882
-2.68825	-1.39958	-1.48653	-0.15158	0.462907	-0.71284	-0.95866	-0.83968	-0.74248	-1.54068	-0.90995	-0.89285				-0.11147	-0.42027	0.308989	-0.81536	-0.58705	-1.48051	-0.01806	0.116204	0.82814	1.367073	-0.80664
-2.68005	-1.36988	-1.3136	-0.25306	0.462522	-0.7724	-1.0025	-0.82102	-0.60843	-1.33184	-0.89047	-0.86267				-0.15714	-0.34879	0.356635	-0.8511	-0.65236	-1.45998	-0.09473	0.102511	0.736111	1.315064	-0.82259
-2.67184	-1.35073	-1.14552	-0.37211	0.492313	-0.83567	-1.02569	-0.82603	-0.47614	-1.14186	-0.89673	-0.81852				-0.20394	-0.28188	0.279339	-0.86422	-0.61581	-1.41137	-0.14592	0.054281	0.713795	1.252021	-0.84299
-2.66364	-1.33848	-1.04263	-0.44591	0.560689	-0.88059	-1.0247	-0.86208	-0.3031	-0.98292	-0.94247	-0.76332				-0.21064	-0.24083	0.136402	-0.85801	-0.49658	-1.36284	-0.1646	-0.00913	0.719916	1.195574	-0.86828
-2.65544	-1.32418	-1.03508	-0.43235	0.642829	-0.89019	-1.01884	-0.92015	-0.06674	-0.85513	-1.00978	-0.70857				-0.16845	-0.20553	0.042817	-0.84766	-0.36609	-1.34089	-0.16152	-0.09199	0.709121	1.146551	-0.89252
-2.64723	-1.27936	-1.08839	-0.36513	0.702989	-0.87197	-1.03338	-0.97589	0.182917	-0.76502	-1.05562	-0.66535				-0.09937	-0.1442	0.05531	-0.85469	-0.29229	-1.34658	-0.16543	-0.19799	0.653071	1.079495	-0.90043
-2.63911	-1.191	-1.15816	-0.28973	0.715202	-0.85968	-1.07247	-1.00784	0.335587	-0.73369	-1.06954	-0.63945				-0.04032	-0.06097	0.138604	-0.8885	-0.28595	-1.3632	-0.19207	-0.31149	0.526007	0.984569	-0.88287
-2.63091	-1.07091	-1.21497	-0.20512	0.67367	-0.8752	-1.10618	-1.01126	0.308777	-0.76364	-1.09629	-0.63218				0.007397	0.016469	0.234583	-0.9476	-0.28821	-1.37599	-0.22448	-0.40382	0.331686	0.868771	-0.83605
-2.6227	-0.93073	-1.25031	-0.0934	0.572584	-0.91506	-1.10988	-1.00811	0.122147	-0.83252	-1.1755	-0.6324				0.065169	0.054246	0.294763	-1.01753	-0.235	-1.39168	-0.23696	-0.47017	0.114894	0.753693	-0.77498
-2.6145	-0.7923	-1.26955	0.035656	0.431681	-0.95042	-1.07629	-1.03027	-0.12563	-0.90615	-1.28749	-0.63126				0.147152	0.045536	0.287705	-1.07198	-0.11041	-1.4232	-0.21853	-0.55382	-0.04634	0.654694	-0.72143
-2.6063	-0.68249	-1.28344	0.089662	0.288534	-0.96248	-1.02452	-1.08909	-0.32231	-0.95626	-1.34734	-0.62246				0.242961	0.01601	0.196389	-1.06683	0.046715	-1.46189	-0.19084	-0.6768	-0.08521	0.567225	-0.69178
-2.5981	-0.63375	-1.29993	-0.00039	0.181775	-0.95398	-0.98166	-1.15755	-0.42214	-0.97737	-1.28863	-0.61263				0.329917	0.004079	0.029045	-0.98276	0.185349	-1.47276	-0.17795	-0.81763	-0.00843	0.491384	-0.68831
-2.58989	-0.6526	-1.3132	-0.20515	0.141379	-0.9319	-0.96086	-1.19667	-0.4641	-0.97552	-1.12165	-0.61749				0.410829	0.026978	-0.14647	-0.85521	0.268043	-1.41596	-0.18649	-0.92141	0.123317	0.437153	-0.6948
-2.58169	-0.6945	-1.31602	-0.40993	0.150924	-0.90422	-0.96151	-1.1925	-0.5124	-0.94584	-0.92953	-0.64178				0.496466	0.059367	-0.258	-0.74941	0.284058	-1.28761	-0.20107	-0.94733	0.247947	0.420681	-0.69847
-2.57349	-0.70238	-1.30107	-0.49799	0.175081	-0.86606	-0.97139	-1.15656	-0.58727	-0.86612	-0.79321	-0.67895				0.586828	0.066049	-0.25706	-0.71789	0.246592	-1.12113	-0.21267	-0.90608	0.330986	0.438231	-0.69791
-2.56528	-0.64954	-1.28673	-0.46636	0.176545	-0.82627	-0.98047	-1.11319	-0.67148	-0.72201	-0.74215	-0.70846				0.673457	0.007943	-0.15956	-0.75979	0.182058	-0.96801	-0.22947	-0.82807	0.371345	0.464167	-0.70938
-2.55708	-0.57977	-1.29664	-0.37806	0.150799	-0.80374	-0.98543	-1.08096	-0.7441	-0.53277	-0.77141	-0.71153				0.73574	-0.12222	-0.03724	-0.84507	0.124121	-0.86679	-0.26164	-0.74434	0.380516	0.475122	-0.73809
-2.54896	-0.54604	-1.33471	-0.3077	0.122973	-0.80549	-0.99065	-1.06903	-0.78397	-0.34803	-0.86283	-0.68181				0.758373	-0.28907	0.054251	-0.9317	0.091126	-0.82147	-0.30606	-0.67826	0.370534	0.453219	-0.76176
-2.54076	-0.55715	-1.3953	-0.27738	0.111116	-0.82585	-0.99651	-1.07796	-0.79349	-0.21968	-0.99471	-0.62094				0.722005	-0.43688	0.092196	-0.98399	0.071252	-0.81609	-0.33266	-0.66494	0.342012	0.407086	-0.76671
-2.53255	-0.58547	-1.45203	-0.25417	0.119303	-0.8424	-1.00299	-1.10119	-0.78111	-0.16276	-1.12995	-0.53836				0.621414	-0.50177	0.101194	-0.98803	0.045301	-0.84116	-0.32604	-0.7253	0.294916	0.365024	-0.76144
-2.52435	-0.58793	-1.47161	-0.21729	0.139886	-0.83691	-1.01441	-1.12691	-0.7599	-0.15892	-1.23152	-0.44201				0.482675	-0.46647	0.121227	-0.94816	0.014345	-0.8943	-0.29956	-0.84285	0.227085	0.351318	-0.76953
-2.51615	-0.55293	-1.41554	-0.15778	0.169494	-0.80886	-1.03924	-1.13242	-0.7441	-0.18449	-1.28144	-0.33758				0.359339	-0.36552	0.18292	-0.90481	-0.0000057	-0.97072	-0.27966	-0.96041	0.150839	0.359037	-0.79314
-2.50794	-0.50256	-1.28639	-0.08865	0.199343	-0.78062	-1.08703	-1.10275	-0.74499	-0.23146	-1.27543	-0.22782				0.292794	-0.26172	0.292493	-0.89779	0.004401	-1.0546	-0.27964	-1.02297	0.088164	0.351174	-0.80336
-2.49974	-0.47063	-1.14957	-0.04205	0.210651	-0.77451	-1.15139	-1.0472	-0.77562	-0.28867	-1.22228	-0.11968				0.27183	-0.19317	0.417227	-0.93008	0.02033	-1.11922	-0.28799	-1.0463	0.055787	0.304335	-0.77163
-2.49154	-0.46337	-1.08075	-0.06927	0.182603	-0.79197	-1.2095	-0.99	-0.81496	-0.33649	-1.12821	-0.02826				0.252716	-0.15365	0.544314	-0.97485	0.034191	-1.14507	-0.2809	-1.08178	0.053465	0.228873	-0.6947
-2.48333	-0.45359	-1.11188	-0.21174	0.106984	-0.81936	-1.24326	-0.9567	-0.83257	-0.37341	-1.00777	0.030834				0.199635	-0.14526	0.653447	-0.99701	0.040929	-1.14188	-0.24076	-1.16075	0.057277	0.157915	-0.60304
-2.47513	-0.40512	-1.19874	-0.4562	0.013334	-0.83902	-1.24962	-0.95428	-0.8249	-0.41104	-0.8856	0.041848				0.1209	-0.17036	0.702399	-0.98923	0.044469	-1.13008	-0.17026	-1.23501	0.053556	0.103297	-0.52868
-2.46693	-0.29778	-1.27135	-0.72574	-0.05242	-0.85188	-1.24045	-0.97173	-0.81213	-0.46281	-0.78299	0.008449				0.04972	-0.23933	0.671512	-0.95934	0.04019	-1.13005	-0.09056	-1.21548	0.036577	0.051484	-0.48091
-2.45881	-0.16373	-1.2949	-0.90169	-0.05815	-0.86867	-1.2257	-0.99554	-0.84133	-0.52088	-0.7137	-0.05679				0.017265	-0.35541	0.585879	-0.92528	0.027957	-1.13468	-0.02156	-1.06509	0.006033	-0.00684	-0.44858
-2.4506	-0.05269	-1.26966	-0.92186	-0.02256	-0.89487	-1.2169	-1.01906	-0.93849	-0.56273	-0.66913	-0.13079				0.026128	-0.49629	0.480255	-0.90134	0.012028	-1.12107	0.026224	-0.83594	-0.02971	-0.06129	-0.42351
-2.4424	0.002915	-1.20565	-0.80882	0.007902	-0.9162	-1.22271	-1.04359	-1.08313	-0.59043	-0.65083	-0.18471				0.028767	-0.62316	0.360872	-0.87978	-0.00357	-1.08147	0.053199	-0.6469	-0.06811	-0.09613	-0.41181
-2.4342	0.003978	-1.10377	-0.65083	-0.000015	-0.91509	-1.24191	-1.064	-1.1983	-0.62294	-0.67179	-0.20111				-0.0196	-0.70184	0.255592	-0.84822	-0.02126	-1.03115	0.065684	-0.57889	-0.09848	-0.11895	-0.4236
-2.42599	-0.03047	-0.98999	-0.54365	-0.05391	-0.88942	-1.26873	-1.07387	-1.21289	-0.67662	-0.72987	-0.18496				-0.11703	-0.7264	0.217688	-0.79835	-0.04837	-0.99851	0.058517	-0.62239	-0.11357	-0.1384	-0.45854
-2.41779	-0.08058	-0.91262	-0.50978	-0.11458	-0.84218	-1.294	-1.07245	-1.11011	-0.74782	-0.80024	-0.16051				-0.19138	-0.70562	0.291557	-0.73535	-0.07345	-0.99069	0.026019	-0.71916	-0.11465	-0.15546	-0.49758
-2.40959	-0.11221	-0.90636	-0.51788	-0.14659	-0.7943	-1.31776	-1.06785	-0.94251	-0.82701	-0.85491	-0.13945				-0.1668	-0.66074	0.451059	-0.66054	-0.0793	-0.99739	-0.02916	-0.79983	-0.11746	-0.16972	-0.52645
-2.40138	-0.11157	-0.95614	-0.52586	-0.13209	-0.77633	-1.34589	-1.06899	-0.80636	-0.91443	-0.90626	-0.1178				-0.07269	-0.60711	0.58969	-0.58579	-0.05476	-1.00048	-0.09534	-0.83485	-0.15084	-0.18433	-0.54471
-2.39318	-0.08611	-1.01189	-0.53774	-0.0707	-0.80388	-1.37104	-1.07198	-0.77711	-0.99879	-0.97288	-0.07712				-0.01106	-0.5409	0.616698	-0.53617	-0.00586	-0.99009	-0.15069	-0.82349	-0.22488	-0.21454	-0.55305
-2.38498	-0.05625	-1.04411	-0.57753	0.01005	-0.86496	-1.37484	-1.06546	-0.86881	-1.06771	-1.05028	-0.00617				-0.06401	-0.45197	0.529125	-0.53911	0.048186	-0.9763	-0.18257	-0.78154	-0.33735	-0.26323	-0.54391
-2.37678	-0.04727	-1.0692	-0.64908	0.077261	-0.91994	-1.34756	-1.04141	-1.04031	-1.10703	-1.11359	0.070489				-0.19726	-0.34251	0.414984	-0.60295	0.084593	-0.96693	-0.19163	-0.71747	-0.45798	-0.32863	-0.5114
-2.36865	-0.05802	-1.10918	-0.73	0.101706	-0.94855	-1.30945	-1.01286	-1.22665	-1.11702	-1.14091	0.114807				-0.30579	-0.23708	0.334772	-0.6925	0.085191	-0.96783	-0.18974	-0.64622	-0.54227	-0.40393	-0.4816
-2.36045	-0.08582	-1.15335	-0.75489	0.090764	-0.95985	-1.29223	-0.99901	-1.35787	-1.10429	-1.13238	0.106539				-0.31995	-0.16725	0.291103	-0.76513	0.055458	-0.97612	-0.18681	-0.60357	-0.56766	-0.47932	-0.48451
-2.35225	-0.12641	-1.18066	-0.70861	0.074082	-0.97739	-1.31137	-1.01041	-1.38798	-1.0632	-1.09891	0.061487				-0.2363	-0.16212	0.264742	-0.79494	0.013826	-0.99203	-0.19386	-0.61093	-0.54171	-0.54688	-0.51922
-2.34404	-0.17467	-1.17304	-0.61753	0.069131	-1.00939	-1.35247	-1.04069	-1.34123	-0.98145	-1.05873	0.014113				-0.11294	-0.23662	0.225956	-0.79153	-0.01415	-1.01341	-0.21728	-0.66126	-0.48722	-0.59032	-0.55031
-2.33584	-0.22133	-1.12196	-0.52603	0.059471	-1.03865	-1.38557	-1.06991	-1.27815	-0.86314	-1.03541	-0.01318				-0.001	-0.36598	0.1674	-0.77482	-0.0298	-1.03679	-0.25336	-0.72084	-0.42355	-0.61238	-0.536
-2.32764	-0.24046	-1.04603	-0.48015	0.009559	-1.06014	-1.39467	-1.08751	-1.25719	-0.74955	-1.05993	-0.01954				0.073063	-0.51017	0.099007	-0.75218	-0.06514	-1.05721	-0.29901	-0.73874	-0.36206	-0.63169	-0.4764
-2.31943	-0.20843	-0.96654	-0.49506	-0.07983	-1.08935	-1.38486	-1.09246	-1.29275	-0.69103	-1.13901	-0.02276				0.108236	-0.61701	0.060332	-0.73852	-0.15136	-1.0658	-0.35134	-0.664	-0.29471	-0.6651	-0.40792
-2.31123	-0.11707	-0.91904	-0.56681	-0.16715	-1.14538	-1.37216	-1.09578	-1.3492	-0.7183	-1.24743	-0.03398				0.108653	-0.6705	0.08434	-0.73793	-0.29779	-1.05691	-0.41862	-0.49477	-0.20305	-0.71504	-0.36401
-2.30303	0.000854	-0.94409	-0.6609	-0.20274	-1.22327	-1.35803	-1.10442	-1.39793	-0.81733	-1.35274	-0.05423				0.078115	-0.69818	0.147079	-0.74104	-0.46709	-1.02586	-0.48939	-0.30457	-0.07281	-0.77308	-0.34777
-2.29483	0.097708	-1.04925	-0.72327	-0.17302	-1.29659	-1.33349	-1.11378	-1.40862	-0.94442	-1.43649	-0.07495				0.034372	-0.74061	0.211909	-0.72545	-0.60463	-0.98124	-0.54348	-0.17507	0.099798	-0.82309	-0.33891
-2.28662	0.155289	-1.19345	-0.71148	-0.12186	-1.33411	-1.2939	-1.1212	-1.34729	-1.0617	-1.49517	-0.08373				-0.00238	-0.82057	0.259183	-0.6846	-0.6614	-0.93905	-0.55957	-0.14448	0.300107	-0.83788	-0.3174
-2.2785	0.204624	-1.30322	-0.61639	-0.11313	-1.31488	-1.24903	-1.12706	-1.18555	-1.1379	-1.5159	-0.07142				-0.01456	-0.91847	0.317492	-0.65055	-0.63284	-0.91591	-0.53138	-0.19004	0.521418	-0.79523	-0.27497
-2.2703	0.292425	-1.33844	-0.47609	-0.1813	-1.23939	-1.21832	-1.14488	-0.94581	-1.16353	-1.48509	-0.04821				-0.0229	-0.99554	0.393026	-0.65432	-0.56337	-0.92601	-0.47639	-0.24793	0.769992	-0.69899	-0.23114
-2.26209	0.418004	-1.30603	-0.35757	-0.31186	-1.13643	-1.20519	-1.17898	-0.71251	-1.14677	-1.41447	-0.04325				-0.08143	-1.00928	0.436516	-0.70907	-0.51167	-0.9623	-0.40665	-0.27978	1.061799	-0.59709	-0.21305
-2.25389	0.530322	-1.24664	-0.3189	-0.46727	-1.05402	-1.20501	-1.21648	-0.55173	-1.10807	-1.32981	-0.07095				-0.22865	-0.93131	0.387399	-0.79858	-0.51755	-1.00412	-0.33863	-0.28736	1.395161	-0.55307	-0.24044
-2.24569	0.563846	-1.20331	-0.37651	-0.5938	-1.01703	-1.20938	-1.23876	-0.4606	-1.07012	-1.25803	-0.12619				-0.42482	-0.78032	0.222875	-0.89591	-0.55742	-1.03843	-0.28113	-0.30358	1.729251	-0.59149	-0.30679
-2.23748	0.50332	-1.1774	-0.50561	-0.65311	-1.00807	-1.21084	-1.23488	-0.38383	-1.0439	-1.20557	-0.19115				-0.56827	-0.63025	-0.00605	-0.98593	-0.57184	-1.06433	-0.24161	-0.33497	2.011145	-0.6824	-0.37784
-2.22928	0.38927	-1.15395	-0.65092	-0.65404	-0.99383	-1.21075	-1.21935	-0.29666	-1.04156	-1.16767	-0.24654				-0.59089	-0.57421	-0.20266	-1.05724	-0.54067	-1.08637	-0.22381	-0.37123	2.191978	-0.76523	-0.41358
-2.22108	0.284425	-1.13586	-0.73392	-0.63295	-0.95067	-1.21005	-1.21344	-0.25486	-1.065	-1.12793	-0.28341				-0.51816	-0.63434	-0.26599	-1.08922	-0.49771	-1.09941	-0.22396	-0.39446	2.255507	-0.80074	-0.39458
-2.21288	0.237537	-1.14346	-0.70874	-0.64297	-0.88502	-1.21228	-1.22694	-0.3257	-1.10707	-1.06037	-0.29895				-0.44353	-0.73308	-0.16877	-1.05727	-0.48956	-1.09928	-0.24155	-0.38267	2.220066	-0.77865	-0.3379
-2.20467	0.235268	-1.18509	-0.58438	-0.701	-0.80732	-1.21602	-1.25112	-0.52378	-1.14968	-0.94833	-0.29861				-0.44367	-0.77054	0.02987	-0.97179	-0.51435	-1.08782	-0.2691	-0.34202	2.1169	-0.70683	-0.27305
-2.19647	0.239861	-1.23653	-0.45262	-0.7801	-0.72034	-1.21873	-1.2735	-0.78886	-1.17069	-0.8008	-0.29602				-0.49641	-0.7098	0.216449	-0.87074	-0.53214	-1.07273	-0.29586	-0.29805	1.984918	-0.61406	-0.22529
-2.18835	0.226572	-1.26031	-0.41431	-0.84663	-0.62507	-1.22033	-1.28116	-1.01978	-1.17291	-0.65675	-0.30996				-0.5226	-0.59391	0.306182	-0.79083	-0.51348	-1.06339	-0.30477	-0.27744	1.851893	-0.52997	-0.204
-2.18015	0.211739	-1.22416	-0.51438	-0.88861	-0.5253	-1.22372	-1.25869	-1.1275	-1.17691	-0.55387	-0.352				-0.45673	-0.48053	0.329173	-0.74604	-0.46242	-1.05339	-0.29665	-0.28672	1.729055	-0.47402	-0.19545
-2.17194	0.24212	-1.13145	-0.68957	-0.91562	-0.43607	-1.23628	-1.19699	-1.10385	-1.19885	-0.48954	-0.40573				-0.32011	-0.40431	0.350017	-0.7343	-0.40481	-1.0325	-0.28595	-0.30903	1.599032	-0.42282	-0.18358
-2.16374	0.32241	-1.01146	-0.80569	-0.91185	-0.36201	-1.25861	-1.10603	-1.0206	-1.2352	-0.42283	-0.44877				-0.18954	-0.36027	0.381469	-0.75383	-0.35646	-1.00082	-0.28636	-0.32199	1.428419	-0.33432	-0.15937
-2.15554	0.411576	-0.89507	-0.78589	-0.86469	-0.30923	-1.28244	-1.01469	-0.96775	-1.27858	-0.31237	-0.46996				-0.1325	-0.33799	0.377121	-0.79317	-0.32242	-0.96519	-0.29356	-0.30986	1.206254	-0.20524	-0.13225
-2.14733	0.451876	-0.79949	-0.65992	-0.80609	-0.28601	-1.29607	-0.94578	-0.9879	-1.32509	-0.14546	-0.47973				-0.17601	-0.33577	0.30127	-0.83109	-0.29612	-0.93636	-0.28498	-0.2848	0.964082	-0.06224	-0.12162
-2.13913	0.431453	-0.73584	-0.53183	-0.79113	-0.2894	-1.29408	-0.89203	-1.05172	-1.36809	0.079487	-0.49688				-0.27801	-0.35048	0.205057	-0.845	-0.27587	-0.92237	-0.24838	-0.27255	0.758861	0.062936	-0.12676
-2.13093	0.385101	-0.71299	-0.49859	-0.8519	-0.30873	-1.27646	-0.83161	-1.11608	-1.39927	0.376153	-0.52981				-0.38504	-0.36793	0.145112	-0.82695	-0.25825	-0.93567	-0.1829	-0.31088	0.621856	0.157209	-0.12681
-2.12272	0.337525	-0.72434	-0.55232	-0.95149	-0.32545	-1.24279	-0.75489	-1.16906	-1.40621	0.734604	-0.57503				-0.47298	-0.3508	0.138714	-0.7966	-0.24065	-0.97563	-0.10336	-0.41993	0.53911	0.219592	-0.09557
-2.11452	0.287305	-0.76841	-0.62055	-1.01622	-0.33457	-1.19481	-0.68088	-1.21959	-1.3904	1.104236	-0.62016				-0.54621	-0.28872	0.157095	-0.76661	-0.22577	-1.02065	-0.02667	-0.57253	0.477289	0.251541	-0.04149
-2.10632	0.225311	-0.82841	-0.62679	-0.99481	-0.34207	-1.12747	-0.62945	-1.26225	-1.35892	1.408037	-0.6579				-0.61114	-0.20294	0.177403	-0.73986	-0.20195	-1.03558	0.029298	-0.70893	0.422967	0.274797	0.001296
-2.09811	0.168757	-0.86583	-0.55817	-0.9045	-0.35493	-1.03159	-0.59791	-1.2642	-1.31638	1.596112	-0.68149				-0.67765	-0.13754	0.195977	-0.71006	-0.1502	-0.99823	0.04868	-0.78882	0.373996	0.320192	0.018291
-2.08999	0.138244	-0.86654	-0.44171	-0.8105	-0.36881	-0.89359	-0.56405	-1.23346	-1.25851	1.659667	-0.67784				-0.75933	-0.12631	0.19145	-0.67438	-0.05533	-0.91754	0.039637	-0.82132	0.314316	0.402582	0.031639
-2.08179	0.141519	-0.85178	-0.31289	-0.76625	-0.37501	-0.71356	-0.5013	-1.20494	-1.17753	1.629514	-0.63055				-0.85114	-0.15938	0.165873	-0.63638	0.079924	-0.82175	0.033745	-0.83605	0.22796	0.490567	0.072758
-2.07359	0.172022	-0.86747	-0.22857	-0.78544	-0.36709	-0.50545	-0.40587	-1.20026	-1.09616	1.539462	-0.52751				-0.9266	-0.22242	0.147093	-0.59089	0.24431	-0.74965	0.059362	-0.85694	0.111159	0.540113	0.140154
-2.06538	0.218883	-0.92475	-0.25001	-0.82596	-0.34603	-0.29328	-0.29016	-1.19368	-1.04671	1.412877	-0.36964				-0.94021	-0.31341	0.175449	-0.54347	0.434911	-0.7064	0.121212	-0.88673	-0.01283	0.542577	0.201139
-2.05718	0.27858	-0.99614	-0.39451	-0.82948	-0.32411	-0.09501	-0.18316	-1.14676	-1.05678	1.266097	-0.17609				-0.8735	-0.42896	0.26393	-0.50373	0.638839	-0.68307	0.201756	-0.92123	-0.12323	0.521896	0.225252
-2.04898	0.340339	-1.04227	-0.56878	-0.76821	-0.30785	0.097958	-0.11493	-1.08244	-1.12962	1.110523	0.014824				-0.7575	-0.53089	0.367119	-0.47799	0.848105	-0.67636	0.281891	-0.97503	-0.21309	0.500182	0.214941
-2.04077	0.395633	-1.04643	-0.6441	-0.67656	-0.30002	0.310072	-0.09855	-1.05451	-1.23897	0.963887	0.169089				-0.65254	-0.56272	0.432265	-0.46638	1.061728	-0.69271	0.351564	-1.04244	-0.27424	0.478593	0.201295
-2.03257	0.439067	-1.03116	-0.57866	-0.61048	-0.30271	0.552415	-0.12494	-1.09348	-1.36024	0.843912	0.274412				-0.59122	-0.51762	0.449917	-0.46115	1.275373	-0.73471	0.404545	-1.10497	-0.30382	0.455794	0.209507
-2.02437	0.471669	-1.00569	-0.46972	-0.59446	-0.31286	0.806759	-0.16917	-1.17667	-1.47244	0.755695	0.347594				-0.54999	-0.44612	0.442818	-0.46184	1.469954	-0.78186	0.442269	-1.1386	-0.29906	0.432956	0.246832
-2.01616	0.497146	-0.96302	-0.45225	-0.62117	-0.33496	1.020186	-0.213	-1.24666	-1.57032	0.691995	0.410416				-0.51966	-0.40093	0.403978	-0.47619	1.609206	-0.81423	0.464094	-1.13209	-0.2743	0.409844	0.305308
-2.00796	0.515	-0.91853	-0.56027	-0.64572	-0.37311	1.137163	-0.2516	-1.27206	-1.64201	0.628289	0.465481				-0.52075	-0.37722	0.304683	-0.51116	1.679448	-0.8231	0.470048	-1.08887	-0.25098	0.371175	0.372454
-1.99984	0.541936	-0.91664	-0.73859	-0.63148	-0.42918	1.137291	-0.28887	-1.25424	-1.67445	0.5565	0.500792				-0.57033	-0.32707	0.143488	-0.55131	1.688596	-0.82749	0.460703	-1.01854	-0.23675	0.310139	0.425671
-1.99164	0.577229	-0.98587	-0.89677	-0.58037	-0.49249	1.051018	-0.33419	-1.21108	-1.68017	0.499238	0.497807				-0.66375	-0.23727	-0.02075	-0.56581	1.671643	-0.85187	0.429189	-0.95025	-0.23203	0.257463	0.446255
-1.98343	0.59353	-1.10623	-0.98743	-0.52891	-0.54113	0.938922	-0.38946	-1.15174	-1.68044	0.485059	0.448335				-0.75058	-0.15103	-0.07399	-0.5277	1.655202	-0.89551	0.374896	-0.9165	-0.2324	0.244514	0.431916
-1.97523	0.550773	-1.23424	-0.99104	-0.52734	-0.56927	0.846583	-0.4471	-1.09375	-1.69386	0.508531	0.372554				-0.78678	-0.13102	0.027366	-0.43575	1.643886	-0.94606	0.30218	-0.93055	-0.24547	0.289543	0.394249
-1.96703	0.428771	-1.33284	-0.90407	-0.59099	-0.57876	0.779827	-0.48993	-1.04599	-1.72236	0.531614	0.306385				-0.7542	-0.18379	0.214688	-0.34004	1.633367	-0.98405	0.228987	-0.97233	-0.27666	0.386294	0.360087
-1.95882	0.266769	-1.3994	-0.78348	-0.70629	-0.57643	0.716927	-0.51045	-0.99517	-1.75699	0.522361	0.279089				-0.67775	-0.26169	0.354103	-0.2851	1.621382	-1.0002	0.168004	-1.01055	-0.32254	0.505124	0.345914
-1.95062	0.133105	-1.44744	-0.69655	-0.83121	-0.55638	0.645925	-0.51254	-0.92839	-1.78117	0.477016	0.281378				-0.60523	-0.28817	0.367504	-0.26993	1.607991	-0.99501	0.121458	-1.04267	-0.37571	0.60628	0.349014
-1.94242	0.080749	-1.4796	-0.68605	-0.92536	-0.51044	0.577527	-0.50987	-0.85674	-1.77953	0.432138	0.280467				-0.55698	-0.23269	0.302096	-0.25159	1.580114	-0.97682	0.081377	-1.08298	-0.43033	0.662119	0.352354
-1.93421	0.118546	-1.49635	-0.73176	-0.97116	-0.45618	0.522564	-0.51674	-0.83453	-1.73643	0.414605	0.25196				-0.53431	-0.1409	0.235133	-0.20916	1.531296	-0.95505	0.043305	-1.14638	-0.47334	0.682362	0.339445
-1.92601	0.201998	-1.50121	-0.77489	-0.96407	-0.42764	0.474753	-0.53001	-0.89984	-1.64863	0.413415	0.198126				-0.50853	-0.07453	0.188561	-0.17873	1.463713	-0.93736	0.01275	-1.23554	-0.49642	0.68667	0.313539
-1.91781	0.265743	-1.51018	-0.78128	-0.92162	-0.45158	0.415331	-0.54785	-1.05478	-1.54189	0.390042	0.14196				-0.45337	-0.08049	0.121282	-0.2008	1.381765	-0.927	-0.00457	-1.34145	-0.50956	0.689526	0.279783
-1.90969	0.256096	-1.51804	-0.74457	-0.87629	-0.51519	0.34078	-0.56962	-1.25141	-1.44697	0.326934	0.095206				-0.37451	-0.13994	0.052696	-0.27813	1.292055	-0.91622	-0.0058	-1.43142	-0.53275	0.687291	0.238918
-1.90149	0.172945	-1.51846	-0.7059	-0.85783	-0.57815	0.259817	-0.60001	-1.4223	-1.38096	0.252672	0.049358				-0.29874	-0.20209	0.069467	-0.36007	1.194925	-0.90389	-0.01163	-1.46156	-0.57043	0.65974	0.18864
-1.89328	0.062424	-1.51019	-0.71823	-0.86668	-0.61084	0.17893	-0.64	-1.53793	-1.33462	0.213654	-0.01182				-0.24333	-0.24681	0.212459	-0.4077	1.104497	-0.89376	-0.03959	-1.42057	-0.58891	0.606999	0.134705
-1.88508	-0.01757	-1.48639	-0.80073	-0.8894	-0.6115	0.096467	-0.68784	-1.58651	-1.28982	0.249036	-0.09481				-0.17256	-0.28841	0.425854	-0.42923	1.029998	-0.8897	-0.09473	-1.31713	-0.53557	0.547557	0.0986
-1.87688	-0.04188	-1.45034	-0.90929	-0.92526	-0.59371	0.0129	-0.74011	-1.58175	-1.24353	0.352254	-0.19157				-0.03638	-0.34237	0.610479	-0.45114	0.975814	-0.89082	-0.16079	-1.19341	-0.40805	0.492175	0.096701
-1.86867	-0.03132	-1.40114	-0.97365	-0.9839	-0.56975	-0.05288	-0.78656	-1.53873	-1.19034	0.484974	-0.27983				0.193241	-0.38821	0.738901	-0.48979	0.935775	-0.89026	-0.21359	-1.09526	-0.27146	0.433898	0.122177
-1.86047	-0.02184	-1.33281	-0.97292	-1.07031	-0.55394	-0.08881	-0.82086	-1.46503	-1.11928	0.601871	-0.32937				0.492914	-0.41618	0.855435	-0.52671	0.893816	-0.88415	-0.25128	-1.06105	-0.21705	0.373319	0.14197
-1.85227	-0.03516	-1.23665	-0.93459	-1.16226	-0.55223	-0.10246	-0.83949	-1.36488	-1.00734	0.677152	-0.33593				0.814475	-0.43887	0.979151	-0.54242	0.85876	-0.87098	-0.2756	-1.10784	-0.27445	0.320185	0.127723
-1.84406	-0.05697	-1.11811	-0.90176	-1.22399	-0.56129	-0.12434	-0.84525	-1.23312	-0.85391	0.711139	-0.32545				1.120678	-0.4639	1.065761	-0.53463	0.844558	-0.86257	-0.29637	-1.20428	-0.39764	0.267365	0.082371
-1.83586	-0.07112	-1.01525	-0.88819	-1.22812	-0.5664	-0.17792	-0.84885	-1.0854	-0.69968	0.704819	-0.32398				1.387456	-0.48742	1.079643	-0.51651	0.848808	-0.87303	-0.3169	-1.29493	-0.52201	0.204597	0.032953
-1.82766	-0.07273	-0.95356	-0.90995	-1.17076	-0.55343	-0.25924	-0.85856	-0.95356	-0.59723	0.651622	-0.33417				1.609521	-0.48391	1.060574	-0.51297	0.845354	-0.90524	-0.34373	-1.32692	-0.604	0.132312	0.008199
-1.81954	-0.0741	-0.9363	-0.99179	-1.07107	-0.52844	-0.34748	-0.87617	-0.87629	-0.5772	0.542018	-0.34176				1.765187	-0.44664	1.05408	-0.53647	0.808613	-0.94797	-0.38435	-1.28312	-0.64499	0.081904	0.019478
-1.81133	-0.09543	-0.94432	-1.13553	-0.9546	-0.50815	-0.41491	-0.89538	-0.87443	-0.61227	0.379165	-0.34577				1.835048	-0.39818	1.05547	-0.58436	0.747996	-0.97821	-0.43185	-1.19805	-0.66943	0.088447	0.067725
-1.80313	-0.13936	-0.96473	-1.29159	-0.86204	-0.5108	-0.45728	-0.91117	-0.92452	-0.6453	0.199475	-0.35333				1.818651	-0.37913	1.012516	-0.63776	0.690578	-0.986	-0.47505	-1.10854	-0.69803	0.154241	0.136565
-1.79493	-0.20998	-1.0069	-1.37649	-0.8192	-0.52723	-0.48678	-0.91539	-0.98214	-0.63897	0.045585	-0.37317				1.737063	-0.40234	0.895527	-0.67021	0.657241	-0.98298	-0.50051	-1.0514	-0.72799	0.245318	0.208257
-1.78672	-0.29512	-1.07537	-1.35812	-0.83984	-0.5379	-0.51162	-0.90172	-1.00713	-0.60122	-0.05323	-0.39904				1.635661	-0.45163	0.740799	-0.6452	0.637723	-0.98766	-0.51005	-1.04913	-0.72817	0.314989	0.270799
-1.77852	-0.38409	-1.14639	-1.26003	-0.93412	-0.53846	-0.53836	-0.86799	-1.00716	-0.57558	-0.10265	-0.41746				1.536954	-0.50213	0.618266	-0.5436	0.608196	-1.00653	-0.50997	-1.11472	-0.68329	0.343651	0.314535
-1.77032	-0.46293	-1.18664	-1.12025	-1.0768	-0.53059	-0.57035	-0.8249	-1.01514	-0.58626	-0.13079	-0.42077				1.444449	-0.53294	0.587887	-0.38849	0.553813	-1.02606	-0.50984	-1.22774	-0.62265	0.332552	0.339772
-1.76211	-0.51261	-1.20882	-0.9759	-1.21639	-0.51992	-0.60961	-0.79584	-1.03785	-0.6172	-0.15989	-0.39967				1.33442	-0.55493	0.631901	-0.22817	0.480174	-1.03855	-0.51355	-1.34323	-0.60228	0.306956	0.347134
-1.75391	-0.53771	-1.2514	-0.83559	-1.29311	-0.50422	-0.65221	-0.79608	-1.0546	-0.63277	-0.1963	-0.35203				1.194406	-0.58773	0.696855	-0.11935	0.409919	-1.05177	-0.52155	-1.43032	-0.65761	0.298419	0.338678
-1.74571	-0.54988	-1.33481	-0.72037	-1.29091	-0.47666	-0.69059	-0.82443	-1.04789	-0.61736	-0.22767	-0.28643				1.056501	-0.64112	0.750857	-0.08342	0.359168	-1.075	-0.53913	-1.47684	-0.75974	0.316159	0.311909
-1.7375	-0.5576	-1.42826	-0.63416	-1.2463	-0.43431	-0.71395	-0.86359	-1.03314	-0.59418	-0.2485	-0.2149				0.958775	-0.69456	0.800718	-0.09712	0.332712	-1.10653	-0.56459	-1.50762	-0.84345	0.342389	0.266737
-1.72938	-0.55472	-1.47295	-0.56511	-1.20007	-0.3862	-0.7233	-0.89752	-1.02615	-0.59579	-0.25946	-0.14605				0.920648	-0.72046	0.88298	-0.11733	0.315752	-1.12792	-0.59309	-1.5402	-0.86052	0.333964	0.213471
-1.72118	-0.52936	-1.4457	-0.50158	-1.16586	-0.35843	-0.73207	-0.91919	-1.04121	-0.62902	-0.26967	-0.07593				0.913667	-0.72306	0.982508	-0.12185	0.293554	-1.12648	-0.61113	-1.56344	-0.8161	0.265954	0.157598
-1.71298	-0.48797	-1.36069	-0.44005	-1.12124	-0.36898	-0.74596	-0.9237	-1.08009	-0.6648	-0.29558	-0.00233				0.88552	-0.7189	1.070109	-0.12801	0.25923	-1.10105	-0.61459	-1.5517	-0.74549	0.149006	0.107135
-1.70477	-0.45434	-1.26446	-0.41832	-1.06557	-0.42346	-0.76345	-0.91057	-1.13864	-0.68175	-0.35294	0.068773				0.81063	-0.72339	1.146881	-0.14945	0.225282	-1.06873	-0.60455	-1.52293	-0.67718	0.020509	0.071377
-1.69657	-0.46492	-1.1929	-0.45549	-1.03557	-0.50348	-0.77817	-0.88132	-1.21367	-0.68079	-0.44366	0.122893				0.726504	-0.71789	1.255505	-0.18758	0.220747	-1.04247	-0.58452	-1.5285	-0.61526	-0.07501	0.05051
-1.68837	-0.53034	-1.16629	-0.52308	-1.05486	-0.58166	-0.79668	-0.84575	-1.27563	-0.67714	-0.53591	0.145135				0.694139	-0.67591	1.439043	-0.22479	0.241303	-1.02558	-0.56916	-1.5844	-0.54749	-0.10732	0.04076
-1.68016	-0.62997	-1.19794	-0.56628	-1.09085	-0.6441	-0.82538	-0.82264	-1.30561	-0.68712	-0.5975	0.122821				0.708833	-0.61561	1.664544	-0.23907	0.255384	-1.01251	-0.56947	-1.6663	-0.46696	-0.06783	0.033597
-1.67196	-0.71676	-1.26453	-0.54889	-1.08127	-0.68607	-0.86387	-0.82261	-1.30012	-0.71534	-0.6221	0.055785				0.702574	-0.57889	1.855774	-0.22612	0.228018	-0.99423	-0.58907	-1.72587	-0.38285	0.022201	0.027734
-1.66376	-0.74994	-1.33635	-0.47474	-1.00982	-0.70056	-0.91077	-0.8451	-1.26784	-0.77123	-0.63208	-0.02913				0.611333	-0.59447	1.960847	-0.19059	0.148971	-0.97593	-0.62376	-1.73898	-0.31919	0.133848	0.026049
-1.65555	-0.71468	-1.39511	-0.37836	-0.91929	-0.67742	-0.96065	-0.88011	-1.2228	-0.85826	-0.65427	-0.09598				0.460865	-0.64481	1.990304	-0.15384	0.054164	-0.9619	-0.65653	-1.70474	-0.29467	0.230161	0.029481
-1.64735	-0.62725	-1.44591	-0.32273	-0.86956	-0.62931	-1.01017	-0.91397	-1.17266	-0.96475	-0.68957	-0.12449				0.334552	-0.70991	1.975803	-0.14724	-0.01802	-0.95198	-0.67349	-1.62167	-0.31541	0.285647	0.029232
-1.63923	-0.54163	-1.49555	-0.34569	-0.87573	-0.5858	-1.05006	-0.93886	-1.14387	-1.06087	-0.73558	-0.13011				0.279859	-0.7953	1.928763	-0.19059	-0.0573	-0.9326	-0.67412	-1.50708	-0.38137	0.298857	0.0198
-1.63103	-0.50104	-1.52718	-0.43243	-0.90609	-0.57592	-1.06818	-0.9536	-1.16043	-1.11568	-0.7855	-0.1411				0.267624	-0.90606	1.869904	-0.26092	-0.08173	-0.89867	-0.66423	-1.39015	-0.47199	0.284209	0.011446
-1.62282	-0.52187	-1.52701	-0.52689	-0.92076	-0.60109	-1.05732	-0.96801	-1.22679	-1.12843	-0.84206	-0.17295				0.233725	-1.0133	1.826413	-0.30248	-0.10688	-0.87115	-0.65547	-1.30562	-0.56681	0.267705	0.016407
-1.61462	-0.59284	-1.49187	-0.58449	-0.90891	-0.63195	-1.01874	-0.99246	-1.31742	-1.11022	-0.90676	-0.22379				0.1738	-1.07102	1.823276	-0.29507	-0.12932	-0.86546	-0.65603	-1.2616	-0.63858	0.264587	0.041189
-1.60642	-0.67495	-1.44411	-0.5784	-0.89062	-0.65033	-0.97242	-1.0315	-1.40085	-1.08092	-0.95822	-0.28318				0.128444	-1.08007	1.862323	-0.26137	-0.14133	-0.88389	-0.66966	-1.22026	-0.66464	0.285785	0.06893
-1.59821	-0.72471	-1.41569	-0.48328	-0.87154	-0.65309	-0.93868	-1.08333	-1.47178	-1.05609	-0.97251	-0.35128				0.130947	-1.07992	1.906749	-0.25074	-0.13876	-0.90968	-0.6839	-1.14986	-0.63973	0.339095	0.083533
-1.59001	-0.71206	-1.42674	-0.30105	-0.85689	-0.65311	-0.92941	-1.13726	-1.51291	-1.04183	-0.93942	-0.41852				0.165398	-1.10096	1.901067	-0.28504	-0.12611	-0.93072	-0.68497	-1.04516	-0.57776	0.424407	0.085906
-1.58181	-0.64496	-1.4741	-0.0649	-0.84781	-0.66238	-0.94684	-1.17913	-1.50486	-1.05233	-0.87593	-0.46465				0.171544	-1.12247	1.831421	-0.35021	-0.10471	-0.94499	-0.67444	-0.92387	-0.51173	0.524105	0.085906
-1.57361	-0.5571	-1.51402	0.123933	-0.83707	-0.68091	-0.98441	-1.2002	-1.4458	-1.10926	-0.81399	-0.48091				0.121159	-1.10112	1.743353	-0.41314	-0.07559	-0.94473	-0.6585	-0.79054	-0.46842	0.593638	0.085071
-1.5654	-0.48981	-1.49625	0.16669	-0.82936	-0.69844	-1.0382	-1.21144	-1.3804	-1.21964	-0.78947	-0.47451				0.032376	-1.03726	1.654996	-0.44006	-0.04731	-0.91632	-0.64595	-0.6503	-0.46689	0.596776	0.070625
-1.5572	-0.48311	-1.40088	0.075821	-0.84037	-0.68803	-1.10316	-1.22961	-1.3629	-1.35456	-0.82028	-0.4647				-0.03974	-0.96336	1.57356	-0.40839	-0.03639	-0.84832	-0.63865	-0.52185	-0.51361	0.545263	0.039475
-1.549	-0.53014	-1.27743	-0.06833	-0.89398	-0.6343	-1.167	-1.26454	-1.40551	-1.46303	-0.88985	-0.46307				-0.04466	-0.91582	1.49665	-0.31843	-0.05326	-0.76366	-0.6401	-0.42252	-0.60216	0.490757	-0.0005
-1.54087	-0.59666	-1.19792	-0.17392	-0.98066	-0.55012	-1.20861	-1.30292	-1.46876	-1.50172	-0.96812	-0.47821				0.005582	-0.89602	1.41769	-0.22047	-0.09628	-0.70336	-0.65507	-0.37744	-0.72383	0.478593	-0.03111
-1.53267	-0.62746	-1.19452	-0.20446	-1.06738	-0.46927	-1.21776	-1.32176	-1.48621	-1.46511	-1.02054	-0.51397				0.051919	-0.89162	1.356437	-0.16476	-0.16023	-0.69578	-0.69402	-0.38303	-0.86661	0.491489	-0.04046
-1.52447	-0.57924	-1.25563	-0.17333	-1.12279	-0.4328	-1.20315	-1.31388	-1.43629	-1.38959	-1.02427	-0.5631				0.02676	-0.89635	1.325288	-0.15332	-0.2324	-0.73337	-0.75249	-0.40309	-1.02047	0.489698	-0.03771
-1.51627	-0.46843	-1.34656	-0.11795	-1.12877	-0.44687	-1.17868	-1.28887	-1.33949	-1.31866	-0.97935	-0.60613				-0.07936	-0.89502	1.303838	-0.14477	-0.29305	-0.77684	-0.8081	-0.39573	-1.16137	0.453585	-0.03198
-1.50806	-0.37268	-1.44086	-0.08989	-1.10111	-0.48929	-1.15048	-1.26935	-1.2293	-1.28185	-0.91579	-0.61906				-0.22151	-0.89636	1.262549	-0.08247	-0.32243	-0.78467	-0.84483	-0.35976	-1.2539	0.394608	-0.02725
-1.49986	-0.36682	-1.49765	-0.09286	-1.05576	-0.52687	-1.11245	-1.26776	-1.13027	-1.2839	-0.87216	-0.60463				-0.3566	-0.91785	1.207804	0.04215	-0.31971	-0.7439	-0.8502	-0.33006	-1.26575	0.340213	-0.01721
-1.49166	-0.45794	-1.48559	-0.09294	-1.00165	-0.53591	-1.06234	-1.2849	-1.05546	-1.31636	-0.86593	-0.58946				-0.45126	-0.9711	1.181209	0.187259	-0.32186	-0.67792	-0.83373	-0.33846	-1.20167	0.301034	0.011793
-1.48345	-0.58144	-1.41665	-0.04332	-0.94778	-0.50556	-1.00609	-1.31101	-1.03134	-1.36274	-0.88924	-0.5899				-0.49939	-1.03675	1.198586	0.288724	-0.35333	-0.61525	-0.80787	-0.38861	-1.10498	0.269254	0.06461
-1.47525	-0.65361	-1.33844	0.053169	-0.90806	-0.43901	-0.9607	-1.33526	-1.05836	-1.40336	-0.90516	-0.5965				-0.50127	-1.06492	1.247511	0.299446	-0.40687	-0.57257	-0.78422	-0.43982	-1.01071	0.221291	0.130374
-1.46705	-0.62952	-1.30978	0.143005	-0.89627	-0.36346	-0.94077	-1.36305	-1.11584	-1.43668	-0.8846	-0.58628				-0.47503	-1.03898	1.282953	0.225782	-0.45401	-0.55095	-0.76649	-0.46397	-0.92513	0.154692	0.182849
-1.45884	-0.52559	-1.3354	0.194805	-0.91377	-0.31712	-0.9416	-1.39692	-1.15781	-1.46171	-0.83609	-0.54775				-0.44734	-0.97834	1.289956	0.116399	-0.48011	-0.546	-0.75381	-0.47781	-0.83784	0.076557	0.203682
-1.45072	-0.39231	-1.37884	0.210328	-0.95705	-0.33104	-0.95406	-1.42945	-1.12729	-1.47887	-0.80379	-0.47685				-0.43793	-0.92462	1.295941	0.034356	-0.49357	-0.55669	-0.7521	-0.52483	-0.77117	-0.00166	0.197531
-1.44252	-0.2858	-1.41077	0.200498	-1.00761	-0.3974	-0.96438	-1.44434	-1.03052	-1.48165	-0.83042	-0.38709				-0.43451	-0.89869	1.326168	-0.00457	-0.49464	-0.57054	-0.75559	-0.62793	-0.76724	-0.06349	0.191682
-1.43432	-0.23257	-1.4275	0.158049	-1.0381	-0.47896	-0.96771	-1.43081	-0.93198	-1.46733	-0.89805	-0.30833				-0.41543	-0.89754	1.39419	-0.02755	-0.47604	-0.56235	-0.76086	-0.74146	-0.83781	-0.10295	0.209775
-1.42611	-0.23701	-1.44163	0.096775	-1.03237	-0.53043	-0.96223	-1.39953	-0.90969	-1.44816	-0.9606	-0.27382				-0.40157	-0.91713	1.495219	-0.06135	-0.44167	-0.51434	-0.75664	-0.81435	-0.95369	-0.13353	0.253555
-1.41791	-0.27491	-1.45159	0.056888	-1.01046	-0.53177	-0.94303	-1.37349	-0.97163	-1.43397	-0.98739	-0.29048				-0.42694	-0.95168	1.632308	-0.09615	-0.41533	-0.43366	-0.73613	-0.83368	-1.056	-0.17723	0.313944
-1.40971	-0.31486	-1.45106	0.089739	-1.01825	-0.50136	-0.91358	-1.36889	-1.04796	-1.43011	-0.98803	-0.326				-0.5039	-0.99423	1.805019	-0.10425	-0.4201	-0.35601	-0.71013	-0.83967	-1.11273	-0.22786	0.388038
-1.4015	-0.3437	-1.43266	0.202489	-1.06663	-0.46021	-0.88413	-1.37664	-1.04787	-1.43359	-0.99295	-0.34585				-0.59178	-1.01921	1.994831	-0.08355	-0.44493	-0.31631	-0.69397	-0.89039	-1.12888	-0.26453	0.485524
-1.3933	-0.35074	-1.40002	0.322506	-1.13858	-0.42727	-0.87409	-1.38079	-0.9487	-1.44099	-1.00992	-0.33731				-0.64404	-1.0067	2.148238	-0.05381	-0.46551	-0.32619	-0.69901	-0.99897	-1.13294	-0.27146	0.602865
-1.3851	-0.33429	-1.36186	0.379522	-1.20152	-0.41143	-0.89313	-1.37261	-0.81897	-1.45298	-1.01889	-0.31523				-0.65964	-0.95637	2.220787	-0.0371	-0.46532	-0.37139	-0.71696	-1.13648	-1.15319	-0.25153	0.722467
-1.37689	-0.29435	-1.32508	0.33806	-1.24206	-0.41831	-0.93212	-1.35384	-0.73765	-1.46485	-1.00419	-0.29153				-0.66429	-0.89061	2.226441	-0.04028	-0.45669	-0.42549	-0.72776	-1.23865	-1.18567	-0.23132	0.833579
-1.36869	-0.24259	-1.29426	0.228489	-1.25883	-0.45773	-0.97452	-1.33446	-0.74316	-1.46935	-0.98848	-0.26668				-0.69168	-0.8433	2.188729	-0.0599	-0.47344	-0.46958	-0.70674	-1.25749	-1.20741	-0.23693	0.941424
-1.36057	-0.19338	-1.272	0.135567	-1.23653	-0.52419	-1.00629	-1.32146	-0.81969	-1.45945	-1.00413	-0.2461				-0.73319	-0.84342	2.126335	-0.09173	-0.53185	-0.49105	-0.65855	-1.17896	-1.19248	-0.28777	1.057023
-1.35237	-0.14168	-1.27197	0.134595	-1.18344	-0.60273	-1.02297	-1.30888	-0.9174	-1.44124	-1.04369	-0.22931				-0.76264	-0.89862	2.038005	-0.11956	-0.61092	-0.49215	-0.61309	-1.02486	-1.14391	-0.38219	1.176361
-1.34416	-0.09987	-1.31051	0.251172	-1.12788	-0.66572	-1.02659	-1.27628	-0.99547	-1.42448	-1.06198	-0.20796				-0.77644	-0.95955	1.945741	-0.1265	-0.66511	-0.48732	-0.60532	-0.83127	-1.09712	-0.48923	1.280886
-1.33596	-0.08355	-1.39207	0.413654	-1.11064	-0.69875	-1.02749	-1.21239	-1.04443	-1.40734	-1.01637	-0.17125				-0.78985	-0.97233	1.895907	-0.09625	-0.6663	-0.4988	-0.64977	-0.62436	-1.08719	-0.5659	1.352188
-1.32776	-0.09473	-1.49152	0.521126	-1.13577	-0.70009	-1.04046	-1.12562	-1.07204	-1.37869	-0.90996	-0.1201				-0.82896	-0.93736	1.917178	-0.04082	-0.62038	-0.54006	-0.72476	-0.43391	-1.12189	-0.57078	1.379963
-1.31955	-0.10648	-1.5748	0.526342	-1.15354	-0.66782	-1.07491	-1.04065	-1.07776	-1.33222	-0.78929	-0.07022				-0.89053	-0.90983	2.011864	-0.00106	-0.57238	-0.59432	-0.80485	-0.28308	-1.17482	-0.49881	1.375183
-1.31135	-0.08827	-1.64241	0.457075	-1.12558	-0.61086	-1.12776	-0.97852	-1.06964	-1.27366	-0.71098	-0.039				-0.94955	-0.95324	2.124395	-0.00796	-0.55687	-0.6314	-0.87445	-0.184	-1.21245	-0.37695	1.350909
-1.30315	-0.06153	-1.70016	0.384567	-1.06241	-0.54163	-1.18221	-0.93424	-1.05277	-1.20175	-0.69272	-0.04398				-0.9764	-1.05669	2.196214	-0.07037	-0.56367	-0.63475	-0.92454	-0.13333	-1.2082	-0.2404	1.320487
-1.29494	-0.07437	-1.74198	0.322321	-1.01474	-0.48418	-1.21843	-0.89243	-1.03191	-1.12334	-0.71382	-0.09088				-0.97709	-1.15629	2.192141	-0.15281	-0.56768	-0.62208	-0.94266	-0.1202	-1.17298	-0.10769	1.293234
-1.28674	-0.14659	-1.74037	0.250076	-1.00598	-0.46288	-1.21991	-0.84851	-1.01615	-1.05516	-0.74226	-0.17339				-0.99219	-1.19599	2.092626	-0.21664	-0.5563	-0.62289	-0.92541	-0.13476	-1.14737	-0.00095	1.272958
-1.27854	-0.23396	-1.67406	0.174899	-1.00848	-0.48618	-1.18936	-0.81105	-0.98692	-1.0221	-0.75557	-0.26912				-1.04604	-1.18306	1.917192	-0.24883	-0.54553	-0.64436	-0.89695	-0.14935	-1.16748	0.047438	1.258848
-1.27042	-0.27513	-1.56967	0.14427	-0.98571	-0.53876	-1.14496	-0.78974	-0.94199	-1.03969	-0.7546	-0.35567				-1.12131	-1.17811	1.689392	-0.26508	-0.55284	-0.66772	-0.88567	-0.11903	-1.23868	0.023162	1.238684
-1.26221	-0.25115	-1.48184	0.181349	-0.93579	-0.60267	-1.11286	-0.78475	-0.91291	-1.08489	-0.7421	-0.4237				-1.16883	-1.20912	1.442579	-0.29693	-0.57826	-0.67376	-0.89615	-0.0044	-1.31188	-0.04839	1.202643
-1.25401	-0.19504	-1.45976	0.24824	-0.89381	-0.66426	-1.11199	-0.79748	-0.94324	-1.12808	-0.71336	-0.46313				-1.15772	-1.25624	1.226323	-0.34327	-0.60496	-0.66715	-0.90719	0.164632	-1.33034	-0.11205	1.155274
-1.24581	-0.15181	-1.50971	0.30004	-0.88261	-0.7115	-1.13247	-0.82711	-1.03039	-1.15605	-0.66881	-0.45395				-1.08689	-1.27567	1.112072	-0.38585	-0.61677	-0.65618	-0.89266	0.302455	-1.27249	-0.13059	1.114019
-1.23761	-0.13753	-1.6059	0.315671	-0.89418	-0.7399	-1.15215	-0.86193	-1.11515	-1.17959	-0.62231	-0.37803				-0.97701	-1.24037	1.146496	-0.40423	-0.61974	-0.64554	-0.85179	0.367594	-1.18141	-0.11326	1.089798
-1.2294	-0.1667	-1.71047	0.322692	-0.89954	-0.74482	-1.16117	-0.88197	-1.14716	-1.20889	-0.60761	-0.25073				-0.8518	-1.16122	1.292515	-0.40321	-0.6146	-0.62854	-0.80792	0.386709	-1.12903	-0.09299	1.075541
-1.2212	-0.24369	-1.76811	0.346655	-0.88724	-0.72308	-1.17268	-0.86951	-1.12763	-1.22844	-0.6441	-0.10802				-0.7496	-1.074	1.466918	-0.40087	-0.60255	-0.59119	-0.77982	0.437644	-1.14912	-0.09158	1.058229
-1.213	-0.35566	-1.75289	0.382006	-0.8748	-0.68382	-1.20362	-0.83348	-1.09751	-1.22484	-0.72044	0.025413				-0.72468	-1.00838	1.60614	-0.41587	-0.5974	-0.53725	-0.76678	0.561867	-1.23446	-0.10398	1.039476
-1.20479	-0.47154	-1.68576	0.392931	-0.88055	-0.64399	-1.24444	-0.80695	-1.08877	-1.2009	-0.78831	0.154967				-0.78941	-0.96121	1.704485	-0.47373	-0.60593	-0.48492	-0.74578	0.720032	-1.33942	-0.13114	1.035008
-1.19659	-0.55648	-1.61816	0.334727	-0.90967	-0.62904	-1.27636	-0.81914	-1.08843	-1.19211	-0.80589	0.287285				-0.91058	-0.91926	1.754883	-0.58468	-0.61859	-0.46791	-0.70546	0.822913	-1.41998	-0.19165	1.040193
-1.18839	-0.60894	-1.59389	0.197582	-0.9518	-0.64452	-1.29072	-0.86863	-1.07897	-1.22798	-0.79095	0.403999				-1.03545	-0.87925	1.724917	-0.72271	-0.61087	-0.49826	-0.65654	0.807304	-1.46142	-0.29033	1.026494
-1.18026	-0.63782	-1.61382	0.010951	-1.01325	-0.68143	-1.29745	-0.92945	-1.07172	-1.29426	-0.79673	0.482397				-1.11425	-0.84785	1.605328	-0.82414	-0.57167	-0.55679	-0.61843	0.691958	-1.47121	-0.3944	0.973281
-1.17206	-0.66054	-1.64377	-0.12423	-1.09099	-0.72362	-1.30959	-0.97896	-1.08924	-1.35293	-0.86269	0.524808				-1.13038	-0.83086	1.460809	-0.84065	-0.52542	-0.60595	-0.60784	0.559307	-1.47812	-0.44021	0.899197
-1.16386	-0.68009	-1.64531	-0.12246	-1.15133	-0.75072	-1.32314	-1.01257	-1.11227	-1.3723	-0.98055	0.552242				-1.07434	-0.82327	1.389636	-0.77962	-0.5062	-0.61745	-0.60952	0.483762	-1.50119	-0.39936	0.841849
-1.15565	-0.6817	-1.60858	-0.00079	-1.15274	-0.75961	-1.32566	-1.04421	-1.10848	-1.36165	-1.09359	0.587072				-0.97165	-0.8215	1.408059	-0.68541	-0.52352	-0.58846	-0.59687	0.460714	-1.53709	-0.29744	0.812497
-1.14745	-0.66251	-1.53659	0.131972	-1.0729	-0.757	-1.31037	-1.07693	-1.07155	-1.35784	-1.14503	0.643938				-0.86904	-0.81658	1.446183	-0.60019	-0.57277	-0.52967	-0.55669	0.427197	-1.55923	-0.20433	0.784741
-1.13925	-0.62378	-1.44749	0.147973	-0.94933	-0.75645	-1.28307	-1.10305	-1.02641	-1.3829	-1.12609	0.757428				-0.80981	-0.80812	1.429866	-0.5269	-0.65774	-0.4554	-0.51139	0.346949	-1.54388	-0.18824	0.7269
-1.13105	-0.57356	-1.36358	0.020611	-0.84632	-0.76194	-1.24939	-1.12013	-1.00243	-1.42382	-1.08042	0.968108				-0.81929	-0.79471	1.343641	-0.46588	-0.7672	-0.37132	-0.4909	0.240135	-1.49453	-0.25046	0.642524
-1.12284	-0.52164	-1.29426	-0.19106	-0.80481	-0.7653	-1.21333	-1.13678	-0.98696	-1.45658	-1.05938	1.271007				-0.88179	-0.77471	1.238926	-0.42614	-0.87495	-0.27976	-0.50686	0.156443	-1.42905	-0.33603	0.571887
-1.11464	-0.47914	-1.23717	-0.39593	-0.82527	-0.76247	-1.18013	-1.16055	-0.9689	-1.48043	-1.09323	1.604212				-0.9727	-0.75224	1.152275	-0.4111	-0.94953	-0.18564	-0.53871	0.123041	-1.37219	-0.38812	0.544365
-1.10644	-0.46117	-1.18467	-0.52532	-0.87147	-0.74974	-1.14795	-1.17873	-0.95845	-1.50445	-1.16793	1.869826				-1.06787	-0.71879	1.096731	-0.41202	-0.97664	-0.09887	-0.54803	0.133478	-1.32811	-0.3965	0.55618
-1.09823	-0.47889	-1.15215	-0.58829	-0.91563	-0.72798	-1.10575	-1.17952	-0.97555	-1.5361	-1.23943	2.019171				-1.14218	-0.68051	1.056708	-0.40517	-0.96489	-0.03204	-0.51619	0.167962	-1.28407	-0.39648	0.575671
-1.09011	-0.54009	-1.1524	-0.61785	-0.9417	-0.69893	-1.03571	-1.15472	-1.01131	-1.5597	-1.27324	2.072004				-1.17158	-0.65035	1.007879	-0.38725	-0.9214	0.018539	-0.44981	0.216796	-1.22108	-0.42197	0.577628
-1.08191	-0.61546	-1.17791	-0.6399	-0.94325	-0.66547	-0.93157	-1.11178	-1.02605	-1.5613	-1.26192	2.078012				-1.14682	-0.64647	0.949351	-0.36569	-0.85976	0.065384	-0.3822	0.27772	-1.13956	-0.48066	0.555687
-1.07371	-0.64673	-1.21524	-0.66334	-0.93485	-0.64289	-0.7994	-1.06956	-1.00892	-1.54991	-1.22799	2.062178				-1.08838	-0.67788	0.900095	-0.3563	-0.79977	0.113616	-0.34	0.323807	-1.06207	-0.55397	0.513079
-1.0655	-0.59227	-1.2504	-0.6801	-0.94386	-0.65112	-0.64817	-1.03842	-0.97001	-1.54263	-1.18997	2.020401				-1.02081	-0.71745	0.898417	-0.36952	-0.77242	0.147357	-0.32143	0.336752	-1.013	-0.62273	0.46223
-1.0573	-0.4723	-1.28845	-0.67183	-0.99036	-0.69446	-0.492	-1.01995	-0.94908	-1.54902	-1.16521	1.950318				-0.96215	-0.72564	0.917266	-0.40351	-0.79778	0.139267	-0.30597	0.301976	-1.00411	-0.66987	0.414447
-1.0491	-0.35767	-1.3271	-0.63938	-1.05607	-0.74583	-0.33395	-1.00561	-0.98129	-1.55897	-1.16756	1.863185				-0.90936	-0.66535	0.884314	-0.4562	-0.86698	0.080953	-0.27285	0.221936	-1.00324	-0.6839	0.369808
-1.04089	-0.2965	-1.35845	-0.61345	-1.10624	-0.78087	-0.18581	-0.98708	-1.06575	-1.57183	-1.19349	1.780133				-0.86311	-0.5298	0.767656	-0.51849	-0.96997	-0.01135	-0.2307	0.127526	-0.96507	-0.66992	0.315805
-1.03269	-0.29408	-1.37546	-0.59984	-1.11391	-0.7986	-0.06275	-0.95033	-1.17657	-1.60087	-1.21235	1.715919				-0.82238	-0.34521	0.627581	-0.58422	-1.08648	-0.09902	-0.19133	0.048745	-0.87459	-0.65346	0.240231
-1.02449	-0.3143	-1.38282	-0.58245	-1.08595	-0.81748	0.015354	-0.87786	-1.27017	-1.65551	-1.1664	1.674104				-0.78801	-0.16311	0.580829	-0.65114	-1.18071	-0.15173	-0.16853	-0.00305	-0.75196	-0.65901	0.149098
-1.01628	-0.34095	-1.40943	-0.55912	-1.05236	-0.84668	0.03681	-0.75455	-1.32387	-1.72276	-1.03203	1.640548				-0.77584	-0.04237	0.689343	-0.7109	-1.21359	-0.16564	-0.15752	-0.05926	-0.64734	-0.67644	0.072416
-1.00808	-0.36736	-1.46752	-0.57156	-1.03509	-0.87123	0.015238	-0.57561	-1.33796	-1.76768	-0.84266	1.60569				-0.79128	0.00049	0.899751	-0.75004	-1.17727	-0.15881	-0.13903	-0.14838	-0.59525	-0.67957	0.044739
-0.99988	-0.3743	-1.54293	-0.66362	-1.03631	-0.86239	-0.02505	-0.36393	-1.33096	-1.78209	-0.6568	1.585979				-0.84276	-0.00566	1.072076	-0.75612	-1.1106	-0.16188	-0.09467	-0.27829	-0.59777	-0.65639	0.068242
-0.99176	-0.34396	-1.61287	-0.80626	-1.04437	-0.795	-0.06728	-0.16137	-1.33457	-1.78994	-0.51772	1.607735				-0.9191	-0.01544	1.11587	-0.73807	-1.05605	-0.18651	-0.01615	-0.42556	-0.62075	-0.63069	0.117876
-0.98355	-0.25356	-1.65824	-0.9166	-1.06096	-0.67675	-0.12203	-0.00365	-1.35497	-1.81301	-0.41829	1.681518				-0.99347	-0.0087	1.03303	-0.72028	-1.03738	-0.2194	0.077028	-0.54986	-0.63057	-0.63064	0.166001
-0.97535	-0.10843	-1.67571	-0.9162	-1.07951	-0.53815	-0.20701	0.105647	-1.37884	-1.84456	-0.33077	1.778473				-1.04239	0.012082	0.88774	-0.72353	-1.04922	-0.24536	0.157793	-0.64628	-0.63413	-0.6502	0.195387
-0.96715	0.062688	-1.68414	-0.81556	-1.0816	-0.40749	-0.3195	0.193858	-1.37226	-1.85575	-0.23822	1.852986				-1.05067	0.026703	0.777521	-0.73516	-1.07136	-0.26084	0.220247	-0.72586	-0.64461	-0.66206	0.211816
-0.95894	0.205547	-1.71135	-0.68298	-1.06372	-0.31247	-0.43864	0.293428	-1.29787	-1.83207	-0.14815	1.880521				-1.03776	0.009668	0.767656	-0.71148	-1.09154	-0.27311	0.302129	-0.7865	-0.65529	-0.63634	0.228646
-0.95074	0.273206	-1.75633	-0.5707	-1.02887	-0.26374	-0.5355	0.414101	-1.13716	-1.78128	-0.07338	1.865135				-1.01895	-0.04458	0.852105	-0.63439	-1.11591	-0.28317	0.446383	-0.82955	-0.62844	-0.57718	0.258813
-0.94254	0.258844	-1.80831	-0.50428	-0.99277	-0.2475	-0.59691	0.530522	-0.91558	-1.72151	-0.01811	1.830477				-0.99734	-0.1371	0.930267	-0.52785	-1.14936	-0.29103	0.661708	-0.87615	-0.53431	-0.50693	0.297086
-0.93433	0.187062	-1.85679	-0.45136	-0.96054	-0.2134	-0.62853	0.61496	-0.69567	-1.65407	-0.00423	1.783251				-0.95318	-0.25409	0.907043	-0.44277	-1.17952	-0.30644	0.917509	-0.94703	-0.38665	-0.4333	0.332287
-0.92613	0.092316	-1.89706	-0.39056	-0.93577	-0.1075	-0.6489	0.657912	-0.53255	-1.57566	-0.056	1.714994				-0.84645	-0.36623	0.801419	-0.39982	-1.20034	-0.34071	1.165189	-1.0232	-0.25031	-0.3406	0.357978
-0.91793	-0.01004	-1.93986	-0.32048	-0.92284	0.086364	-0.67636	0.67284	-0.45175	-1.49076	-0.1761	1.623889				-0.66989	-0.44122	0.717203	-0.39354	-1.20824	-0.39049	1.370457	-1.07302	-0.18547	-0.20465	0.371956
-0.90973	-0.11943	-1.97946	-0.25694	-0.91406	0.344577	-0.71768	0.67644	-0.42583	-1.41251	-0.31564	1.519338				-0.46468	-0.45127	0.736176	-0.41458	-1.20406	-0.43153	1.51239	-1.07327	-0.2023	-0.01353	0.377952
-0.9016	-0.2111	-1.99828	-0.21439	-0.91142	0.612824	-0.76164	0.668039	-0.4297	-1.36236	-0.40312	1.423175				-0.30293	-0.4102	0.805038	-0.45223	-1.18997	-0.44486	1.590087	-1.02225	-0.26729	0.225592	0.367215
-0.8934	-0.25563	-1.98207	-0.17508	-0.91193	0.84834	-0.79202	0.638632	-0.46694	-1.35698	-0.39453	1.355184				-0.22271	-0.34667	0.825331	-0.49889	-1.17238	-0.43187	1.607885	-0.94843	-0.32914	0.498247	0.332209
-0.8852	-0.25073	-1.95368	-0.12692	-0.91625	1.018778	-0.80899	0.587406	-0.53553	-1.40757	-0.29789	1.316045				-0.2105	-0.30328	0.762909	-0.52244	-1.16586	-0.41582	1.580511	-0.89134	-0.35251	0.800401	0.279885
-0.87699	-0.2353	-1.94586	-0.08163	-0.92221	1.112897	-0.81435	0.525092	-0.60136	-1.49648	-0.15261	1.28071				-0.24462	-0.30748	0.654946	-0.50169	-1.17566	-0.41154	1.530317	-0.88619	-0.32737	1.141558	0.221713
-0.86879	-0.23148	-1.9669	-0.07268	-0.93324	1.137628	-0.81074	0.465833	-0.60925	-1.57903	0.019963	1.226833				-0.32273	-0.33975	0.565268	-0.45582	-1.19398	-0.41763	1.468954	-0.94541	-0.27025	1.507643	0.168359
-0.86059	-0.22149	-1.99777	-0.10538	-0.95824	1.116782	-0.79415	0.414576	-0.56333	-1.6088	0.206052	1.152811				-0.44115	-0.36736	0.527474	-0.4161	-1.1829	-0.43434	1.395347	-1.06857	-0.22635	1.855336	0.129569
-0.85238	-0.17415	-1.99536	-0.13581	-0.99445	1.076349	-0.76204	0.373771	-0.52924	-1.54272	0.389371	1.066469				-0.5515	-0.36063	0.552721	-0.40003	-1.11309	-0.46499	1.309561	-1.20911	-0.22443	2.136083	0.123183
-0.84418	-0.08862	-1.95851	-0.12013	-1.02511	1.020586	-0.73151	0.339806	-0.54978	-1.35713	0.539907	0.974549				-0.59765	-0.31315	0.623907	-0.39919	-1.01255	-0.51441	1.218272	-1.30463	-0.25799	2.326055	0.152765
-0.83598	-0.0071	-1.91822	-0.04194	-1.0254	0.95404	-0.72157	0.301659	-0.60842	-1.05383	0.639212	0.875939				-0.56537	-0.23978	0.688861	-0.40972	-0.93942	-0.56736	1.129397	-1.33373	-0.28896	2.435348	0.196554
-0.82778	0.034528	-1.88878	0.078521	-1.00358	0.888523	-0.73797	0.247977	-0.64658	-0.67356	0.698559	0.776824				-0.49925	-0.17104	0.700583	-0.42445	-0.93232	-0.60332	1.042627	-1.30791	-0.26707	2.473082	0.222982
-0.81957	0.019159	-1.86275	0.217194	-0.99634	0.837247	-0.7681	0.172809	-0.6507	-0.29957	0.725483	0.690368				-0.46423	-0.13294	0.665265	-0.43001	-0.96775	-0.60626	0.951364	-1.25072	-0.1609	2.452251	0.219184
-0.81145	-0.04743	-1.82938	0.340112	-1.03632	0.798202	-0.79816	0.086405	-0.63352	-0.01927	0.726252	0.630464				-0.47965	-0.11781	0.632148	-0.42153	-0.99281	-0.58003	0.857632	-1.17832	0.028455	2.381757	0.199796
-0.80325	-0.14321	-1.8148	0.408917	-1.11597	0.751791	-0.82517	0.007132	-0.60021	0.129825	0.711481	0.599583				-0.53025	-0.11028	0.61711	-0.41409	-0.98251	-0.555	0.768321	-1.11395	0.250703	2.272392	0.181023
-0.79504	-0.22655	-1.85375	0.402837	-1.19329	0.693324	-0.85118	-0.0485	-0.54602	0.206125	0.694106	0.581598				-0.57836	-0.09784	0.593749	-0.43883	-0.96477	-0.54446	0.694365	-1.0912	0.445276	2.124109	0.170097
-0.78684	-0.2525	-1.9411	0.331333	-1.25396	0.628203	-0.88392	-0.07686	-0.47933	0.298326	0.686195	0.562293				-0.60221	-0.08258	0.546805	-0.50439	-0.99004	-0.54298	0.636286	-1.12617	0.560161	1.946282	0.158384
-0.77864	-0.22884	-2.01527	0.238781	-1.30147	0.573725	-0.92753	-0.08689	-0.43839	0.448938	0.684472	0.527649				-0.60369	-0.08113	0.503493	-0.57769	-1.07178	-0.5355	0.582014	-1.20946	0.563428	1.774214	0.141921
-0.77043	-0.20277	-2.01116	0.148606	-1.338	0.533639	-0.98135	-0.09432	-0.44283	0.640318	0.685938	0.472742				-0.60374	-0.11615	0.500865	-0.60827	-1.17513	-0.52176	0.517034	-1.28134	0.482396	1.646945	0.11478
-0.76223	-0.2321	-1.92854	0.091807	-1.34669	0.491355	-1.03473	-0.11731	-0.48122	0.822702	0.695744	0.407384				-0.6367	-0.18952	0.525341	-0.58335	-1.25326	-0.51987	0.433851	-1.29048	0.388429	1.583366	0.062188
-0.75403	-0.32948	-1.82238	0.094538	-1.32112	0.439477	-1.06626	-0.16534	-0.51613	0.969671	0.717551	0.347852				-0.69179	-0.27046	0.540751	-0.5457	-1.28452	-0.53361	0.351605	-1.24303	0.351085	1.561352	-0.01687
-0.74583	-0.45124	-1.74945	0.133638	-1.29774	0.382532	-1.07133	-0.23653	-0.5273	1.071068	0.738662	0.308336				-0.73562	-0.31966	0.509698	-0.54653	-1.27393	-0.54457	0.293311	-1.19054	0.402567	1.55396	-0.10253
-0.73762	-0.56172	-1.71542	0.154732	-1.30493	0.341095	-1.07336	-0.31381	-0.52009	1.125708	0.722569	0.293364				-0.75806	-0.30657	0.445418	-0.59587	-1.24142	-0.52116	0.269283	-1.18396	0.527435	1.548835	-0.15776
-0.72942	-0.6313	-1.69657	0.107422	-1.33873	0.320839	-1.09996	-0.38313	-0.51766	1.129442	0.64834	0.299467				-0.77668	-0.24789	0.395544	-0.64086	-1.21754	-0.4577	0.261055	-1.2202	0.682691	1.54256	-0.16524
-0.7213	-0.63256	-1.68375	0.027585	-1.35098	0.304741	-1.14612	-0.43995	-0.55226	1.090898	0.533679	0.311888				-0.81576	-0.17758	0.401364	-0.63668	-1.21613	-0.37785	0.240377	-1.2575	0.819221	1.542299	-0.14005
-0.7131	-0.55196	-1.69165	-0.00644	-1.29638	0.266513	-1.17667	-0.48464	-0.62702	1.034816	0.419919	0.306886				-0.8624	-0.11179	0.496297	-0.58823	-1.23437	-0.31228	0.190377	-1.24128	0.909207	1.54824	-0.10632
-0.70489	-0.4192	-1.73045	0.039945	-1.19522	0.184624	-1.16274	-0.52158	-0.72697	0.982953	0.328795	0.27393				-0.89663	-0.06415	0.666393	-0.54084	-1.24207	-0.27978	0.119357	-1.1711	0.940919	1.553705	-0.08472
-0.69669	-0.30314	-1.76057	0.131417	-1.10208	0.074802	-1.10354	-0.54755	-0.81437	0.939444	0.257289	0.219691				-0.91995	-0.046	0.867185	-0.53619	-1.21322	-0.28083	0.051108	-1.09637	0.915238	1.53588	-0.0804
-0.68849	-0.25365	-1.73907	0.18047	-1.06235	-0.02235	-1.03069	-0.56721	-0.84608	0.88655	0.197667	0.169466				-0.94882	-0.07836	1.042083	-0.56464	-1.16355	-0.30645	-0.00757	-1.06722	0.844482	1.471746	-0.096
-0.68028	-0.26788	-1.66317	0.159793	-1.06155	-0.07489	-0.9743	-0.58897	-0.79014	0.812184	0.161463	0.152144				-0.98724	-0.15789	1.132627	-0.5964	-1.13674	-0.34005	-0.05463	-1.08782	0.748731	1.372289	-0.13266
-0.67208	-0.3078	-1.57486	0.11989	-1.06593	-0.08533	-0.94838	-0.62086	-0.6467	0.730525	0.178056	0.18705				-1.01224	-0.25247	1.111632	-0.61749	-1.16632	-0.37478	-0.10138	-1.11202	0.636345	1.282487	-0.18521
-0.66388	-0.33874	-1.51225	0.12364	-1.08241	-0.07896	-0.9438	-0.66083	-0.46617	0.669217	0.257	0.275056				-1.02034	-0.32992	0.974336	-0.64017	-1.21829	-0.41749	-0.14894	-1.1106	0.502886	1.244576	-0.24384
-0.65567	-0.35193	-1.46642	0.180393	-1.15179	-0.06857	-0.94689	-0.69575	-0.29881	0.647035	0.382676	0.404285				-1.02413	-0.37067	0.784826	-0.68006	-1.23684	-0.4819	-0.18934	-1.08901	0.36479	1.246518	-0.28896
-0.64747	-0.35473	-1.42207	0.250508	-1.29253	-0.04804	-0.96011	-0.72346	-0.18079	0.636099	0.510958	0.55291				-1.0404	-0.389	0.632382	-0.72744	-1.20561	-0.56213	-0.21598	-1.07691	0.239048	1.247028	-0.3009
-0.63927	-0.36295	-1.37058	0.293312	-1.4487	-0.0135	-0.99022	-0.74447	-0.13196	0.593311	0.589691	0.693934				-1.06963	-0.39447	0.573248	-0.761	-1.15088	-0.62525	-0.22247	-1.08112	0.139352	1.210607	-0.26688
-0.63115	-0.39122	-1.32057	0.287155	-1.52597	0.003636	-1.03975	-0.76162	-0.15275	0.49857	0.590796	0.813742				-1.11242	-0.3978	0.608071	-0.75522	-1.11019	-0.64719	-0.22033	-1.06924	0.075249	1.124125	-0.19189
-0.62294	-0.45332	-1.28002	0.242006	-1.46266	-0.0314	-1.08719	-0.77344	-0.24832	0.381234	0.512339	0.905157				-1.17453	-0.39925	0.706348	-0.71236	-1.09107	-0.62685	-0.21877	-1.02929	0.049036	0.99317	-0.10618
-0.61474	-0.54062	-1.23171	0.162756	-1.2887	-0.12106	-1.10713	-0.77543	-0.38343	0.298187	0.385031	0.961156				-1.25797	-0.37681	0.864626	-0.66888	-1.08542	-0.58381	-0.22851	-0.98592	0.056941	0.84224	-0.04628
-0.60654	-0.63809	-1.16204	0.026552	-1.08792	-0.22574	-1.0976	-0.76653	-0.48862	0.267136	0.248332	0.973786				-1.34935	-0.31372	1.072255	-0.66203	-1.09058	-0.5388	-0.2475	-0.99362	0.078768	0.718338	-0.0327
-0.59833	-0.73886	-1.07119	-0.18228	-0.94821	-0.30056	-1.07591	-0.75037	-0.51234	0.255981	0.143614	0.943305				-1.40168	-0.22956	1.268424	-0.71544	-1.10471	-0.49198	-0.26615	-1.06126	0.099224	0.654871	-0.04573
-0.59013	-0.83911	-0.97509	-0.41301	-0.915	-0.34352	-1.06494	-0.73704	-0.46775	0.214752	0.098263	0.892732				-1.39435	-0.18249	1.361431	-0.80549	-1.11772	-0.43362	-0.28554	-1.12608	0.096621	0.655975	-0.0578
-0.58193	-0.93669	-0.8946	-0.56334	-0.95752	-0.3784	-1.06653	-0.73927	-0.40157	0.127655	0.099881	0.852805				-1.33397	-0.20466	1.324641	-0.8825	-1.11416	-0.35195	-0.30992	-1.12444	0.052009	0.685062	-0.05641
-0.57372	-1.00079	-0.85279	-0.58369	-1.0164	-0.42906	-1.07886	-0.76638	-0.33102	0.0283	0.108739	0.845835				-1.24655	-0.26799	1.219939	-0.91106	-1.10095	-0.23474	-0.34097	-1.04312	-0.03023	0.695716	-0.04997
-0.56552	-0.99867	-0.85297	-0.4916	-1.04644	-0.49521	-1.10721	-0.81168	-0.26667	-0.03568	0.073884	0.861755				-1.17659	-0.31527	1.131747	-0.89636	-1.094	-0.0776	-0.35992	-0.95105	-0.12447	0.673055	-0.05147
-0.55732	-0.91671	-0.87495	-0.37661	-1.03987	-0.56305	-1.14942	-0.85515	-0.24443	-0.04079	-0.01623	0.876521				-1.14314	-0.32628	1.106115	-0.85937	-1.09373	0.10703	-0.34747	-0.92178	-0.18683	0.614646	-0.06202
-0.54911	-0.77344	-0.89216	-0.33001	-1.0225	-0.62127	-1.19063	-0.8768	-0.32118	-0.01053	-0.12823	0.880788				-1.14761	-0.32372	1.119791	-0.82033	-1.07768	0.291812	-0.3037	-0.97006	-0.19177	0.524327	-0.07101
-0.54099	-0.61854	-0.88697	-0.36469	-1.01506	-0.64821	-1.21123	-0.87129	-0.5059	0.018364	-0.21745	0.872168				-1.17863	-0.31809	1.1464	-0.79904	-1.02759	0.457341	-0.25601	-1.04886	-0.15169	0.408654	-0.06024
-0.53279	-0.48892	-0.85815	-0.43165	-1.02475	-0.63624	-1.21185	-0.84898	-0.72735	0.017466	-0.26548	0.847833				-1.23701	-0.30094	1.166914	-0.80316	-0.95084	0.591089	-0.23084	-1.10082	-0.11331	0.285817	-0.02874
-0.52459	-0.40576	-0.80884	-0.45451	-1.03027	-0.5949	-1.20977	-0.8153	-0.88559	-0.03084	-0.29107	0.797212				-1.328	-0.26267	1.167698	-0.83514	-0.86983	0.689888	-0.22451	-1.1047	-0.11572	0.181184	0.014854
-0.51638	-0.36091	-0.74981	-0.40204	-1.01013	-0.54808	-1.22365	-0.77141	-0.92835	-0.12739	-0.3262	0.721574				-1.42891	-0.22235	1.150816	-0.87577	-0.80283	0.752365	-0.21928	-1.06038	-0.15642	0.107154	0.057979
-0.50818	-0.33749	-0.70204	-0.29253	-0.95859	-0.51871	-1.25429	-0.71836	-0.8903	-0.25294	-0.39647	0.644982				-1.51386	-0.20957	1.12795	-0.88986	-0.74771	0.783209	-0.20412	-0.97692	-0.2063	0.067831	0.088928
-0.49998	-0.32959	-0.68687	-0.18185	-0.87956	-0.50796	-1.29222	-0.66038	-0.82305	-0.36937	-0.49576	0.594939				-1.55256	-0.21952	1.132861	-0.85885	-0.70901	0.796003	-0.19452	-0.86166	-0.23362	0.054903	0.121684
-0.49177	-0.33156	-0.72743	-0.12351	-0.80491	-0.50791	-1.32659	-0.60655	-0.7722	-0.4438	-0.59206	0.578938				-1.53428	-0.23234	1.16313	-0.78885	-0.69962	0.809381	-0.20581	-0.7482	-0.22557	0.056203	0.182308
-0.48357	-0.34105	-0.80658	-0.1013	-0.75505	-0.51636	-1.34531	-0.55945	-0.76148	-0.47365	-0.65334	0.578647				-1.47563	-0.22287	1.188638	-0.72015	-0.72101	0.844514	-0.23238	-0.68409	-0.18802	0.049693	0.284201
-0.47537	-0.34627	-0.88868	-0.0751	-0.72957	-0.54176	-1.34228	-0.51671	-0.78635	-0.49682	-0.67063	0.576921				-1.40404	-0.19086	1.181195	-0.68044	-0.76157	0.903806	-0.25754	-0.69109	-0.13894	0.009299	0.405102
-0.46716	-0.33677	-0.95026	-0.03893	-0.717	-0.58429	-1.31679	-0.48101	-0.83605	-0.55527	-0.66648	0.575939				-1.35529	-0.16706	1.121689	-0.66506	-0.79459	0.96621	-0.27369	-0.76051	-0.10345	-0.06232	0.498032
-0.45896	-0.30947	-0.97354	-0.04552	-0.70249	-0.63017	-1.28001	-0.46066	-0.86815	-0.65269	-0.66554	0.578766				-1.35298	-0.17681	1.037845	-0.65512	-0.80996	1.001417	-0.29341	-0.85561	-0.09273	-0.12682	0.529015
-0.45076	-0.27686	-0.94743	-0.13718	-0.67934	-0.66691	-1.25278	-0.46156	-0.83213	-0.76656	-0.69149	0.573936				-1.39086	-0.22464	0.983871	-0.64761	-0.82296	0.993212	-0.3231	-0.95686	-0.11233	-0.13873	0.494649
-0.44264	-0.25781	-0.86049	-0.26987	-0.64448	-0.69011	-1.25229	-0.47816	-0.69605	-0.86354	-0.75686	0.538768				-1.41519	-0.27158	1.005375	-0.66882	-0.85913	0.959613	-0.35746	-1.05135	-0.15835	-0.08675	0.428444
-0.43444	-0.25838	-0.73452	-0.36646	-0.60462	-0.70633	-1.27953	-0.49995	-0.47847	-0.93109	-0.85558	0.464136				-1.38408	-0.28007	1.09149	-0.72666	-0.93092	0.922398	-0.38997	-1.12648	-0.23106	0.00073	0.368197
-0.42623	-0.277	-0.6075	-0.38553	-0.56774	-0.70923	-1.31039	-0.51797	-0.26049	-0.96952	-0.96363	0.362418				-1.30658	-0.26057	1.170271	-0.80256	-1.01127	0.895238	-0.41887	-1.17373	-0.32228	0.07476	0.334284
-0.41803	-0.30622	-0.51394	-0.36405	-0.54897	-0.69344	-1.31366	-0.52661	-0.12517	-0.98348	-1.03793	0.269735				-1.22562	-0.26207	1.180658	-0.85177	-1.06305	0.876278	-0.44401	-1.20037	-0.4119	0.094794	0.316015
-0.40983	-0.35373	-0.48284	-0.34626	-0.55371	-0.66123	-1.27654	-0.52886	-0.121	-0.98263	-1.05882	0.218041				-1.17391	-0.31451	1.125033	-0.85335	-1.06852	0.866654	-0.46285	-1.24644	-0.48082	0.053994	0.296685
-0.40162	-0.43164	-0.51329	-0.33963	-0.56795	-0.62754	-1.21835	-0.52506	-0.23132	-0.96418	-1.04032	0.211981				-1.1304	-0.38455	1.072255	-0.82961	-1.05246	0.880063	-0.4691	-1.31651	-0.50897	-0.0264	0.281326
-0.39342	-0.5395	-0.59316	-0.30295	-0.57761	-0.61084	-1.17748	-0.51558	-0.3949	-0.9294	-1.0226	0.226886				-1.08116	-0.4254	1.066917	-0.80854	-1.05741	0.908379	-0.4705	-1.36783	-0.50294	-0.09777	0.283635
-0.38522	-0.66777	-0.68967	-0.1973	-0.56597	-0.60614	-1.16649	-0.50145	-0.55604	-0.88692	-1.03479	0.224425				-1.03526	-0.41853	1.086027	-0.79425	-1.0894	0.923155	-0.48096	-1.35486	-0.48676	-0.11534	0.303521
-0.37701	-0.78149	-0.76496	-0.04816	-0.53166	-0.60504	-1.17306	-0.48747	-0.67779	-0.85562	-1.06252	0.185019				-1.02491	-0.39092	1.076369	-0.77719	-1.12556	0.889262	-0.51143	-1.26715	-0.48166	-0.06209	0.315517
-0.36881	-0.84997	-0.79561	0.112252	-0.48127	-0.60091	-1.18194	-0.48344	-0.75533	-0.85473	-1.07349	0.111278				-1.05781	-0.37412	1.022119	-0.772	-1.13993	0.8151	-0.55787	-1.1646	-0.50456	0.034915	0.301099
-0.36061	-0.85831	-0.80529	0.250045	-0.43737	-0.5967	-1.19064	-0.49367	-0.80126	-0.88381	-1.04934	0.01953				-1.07871	-0.37961	0.96227	-0.8034	-1.12613	0.73833	-0.60607	-1.10635	-0.5532	0.121932	0.264072
-0.35249	-0.82256	-0.83442	0.342628	-0.42082	-0.60282	-1.20331	-0.51268	-0.84135	-0.93076	-1.00497	-0.07364				-1.03935	-0.38723	0.910276	-0.88058	-1.09154	0.676736	-0.64595	-1.11102	-0.60754	0.182491	0.216894
-0.34428	-0.76692	-0.88265	0.378442	-0.43421	-0.62327	-1.21285	-0.52691	-0.88617	-0.97831	-0.97507	-0.16229				-0.9364	-0.37249	0.849588	-0.97787	-1.04186	0.62003	-0.67116	-1.15551	-0.62839	0.23437	0.169272
-0.33608	-0.69574	-0.91984	0.35545	-0.47555	-0.6578	-1.20399	-0.53386	-0.93282	-1.02371	-0.98305	-0.23537				-0.8288	-0.35012	0.74666	-1.05022	-0.98091	0.557306	-0.68289	-1.21798	-0.58486	0.307694	0.127504
-0.32788	-0.62411	-0.91757	0.298481	-0.50888	-0.69834	-1.16949	-0.53947	-0.96809	-1.06536	-1.01883	-0.28676				-0.77036	-0.35545	0.610864	-1.07321	-0.91905	0.507323	-0.68021	-1.29705	-0.47583	0.402811	0.105977
-0.31967	-0.57957	-0.87955	0.244413	-0.49952	-0.73938	-1.11999	-0.55314	-0.97448	-1.09354	-1.04984	-0.32074				-0.74993	-0.42577	0.486474	-1.04934	-0.87975	0.501715	-0.66399	-1.39408	-0.32713	0.475383	0.112212
-0.31147	-0.59744	-0.82432	0.246898	-0.45528	-0.77883	-1.07115	-0.57347	-0.93644	-1.10547	-1.06673	-0.35516				-0.73129	-0.54551	0.404982	-0.9897	-0.8683	0.545884	-0.63609	-1.50477	-0.16832	0.486587	0.127591
-0.30327	-0.69526	-0.75651	0.32425	-0.42109	-0.81388	-1.02738	-0.58874	-0.85643	-1.11003	-1.08643	-0.40828				-0.68825	-0.64328	0.393521	-0.89634	-0.87982	0.602148	-0.60375	-1.59079	0.000227	0.432322	0.12495
-0.29506	-0.83912	-0.68044	0.424964	-0.44791	-0.84303	-0.9869	-0.59657	-0.78305	-1.12381	-1.13077	-0.47383				-0.65464	-0.67131	0.448005	-0.78178	-0.90535	0.631016	-0.57783	-1.60912	0.192673	0.352684	0.098283
-0.28686	-0.96796	-0.60122	0.480112	-0.53699	-0.85289	-0.94989	-0.59812	-0.763	-1.14158	-1.19716	-0.5342				-0.67883	-0.62401	0.554028	-0.68836	-0.93524	0.631873	-0.56375	-1.54468	0.399286	0.28115	0.079325
-0.27866	-1.03071	-0.52866	0.438512	-0.63511	-0.8321	-0.92422	-0.60374	-0.79639	-1.14514	-1.26387	-0.57194				-0.76152	-0.53764	0.690003	-0.63785	-0.95858	0.630417	-0.56598	-1.42749	0.575733	0.229389	0.099137
-0.27045	-1.01207	-0.46086	0.335915	-0.66806	-0.78945	-0.91579	-0.61848	-0.84214	-1.1107	-1.30152	-0.59475				-0.84438	-0.45927	0.82518	-0.6177	-0.95608	0.647626	-0.57296	-1.30549	0.67664	0.197728	0.160405
-0.26233	-0.92	-0.39783	0.271308	-0.61574	-0.75294	-0.92869	-0.63801	-0.84945	-1.03304	-1.27795	-0.62173				-0.86848	-0.43005	0.948759	-0.58968	-0.92923	0.667107	-0.58412	-1.21198	0.687155	0.189681	0.241535
-0.25413	-0.79411	-0.35776	0.324821	-0.53242	-0.75206	-0.95715	-0.65655	-0.82326	-0.93498	-1.18607	-0.66536				-0.84556	-0.47207	1.040707	-0.54381	-0.89791	0.658744	-0.60412	-1.15236	0.632861	0.209696	0.313608
-0.24593	-0.69255	-0.3422	0.485235	-0.47922	-0.79125	-0.9871	-0.66436	-0.79727	-0.84554	-1.04119	-0.7268				-0.82262	-0.55941	1.076699	-0.52178	-0.8776	0.61039	-0.63046	-1.10526	0.58133	0.241534	0.356259
-0.23772	-0.64027	-0.33927	0.67523	-0.47356	-0.83633	-1.00997	-0.66121	-0.79194	-0.78889	-0.88166	-0.79605				-0.82897	-0.64511	1.044656	-0.55947	-0.8579	0.540502	-0.65156	-1.06313	0.590921	0.25596	0.370413
-0.22952	-0.60787	-0.31385	0.812359	-0.49431	-0.83841	-1.02264	-0.65692	-0.80865	-0.75962	-0.75503	-0.85943				-0.84999	-0.69364	0.973029	-0.66082	-0.80726	0.47455	-0.64813	-1.0285	0.679984	0.237168	0.371277
-0.22132	-0.54288	-0.24649	0.860425	-0.51662	-0.78612	-1.03736	-0.66483	-0.83247	-0.74503	-0.68671	-0.90316				-0.87424	-0.71961	0.909327	-0.78368	-0.71188	0.415116	-0.62607	-0.98705	0.807559	0.20063	0.366156
-0.21311	-0.43651	-0.17191	0.837912	-0.5316	-0.71217	-1.06392	-0.68265	-0.85385	-0.74326	-0.68105	-0.92594				-0.90811	-0.75069	0.868547	-0.87738	-0.58257	0.355383	-0.60071	-0.93482	0.897986	0.175707	0.347086
-0.20491	-0.31627	-0.14075	0.771222	-0.55098	-0.66375	-1.10047	-0.6937	-0.85133	-0.76155	-0.72486	-0.9338				-0.95499	-0.77188	0.835788	-0.90849	-0.46198	0.296522	-0.59125	-0.87545	0.906185	0.166562	0.305962
-0.19671	-0.22203	-0.17513	0.705566	-0.57901	-0.65782	-1.13721	-0.68606	-0.80287	-0.81017	-0.79876	-0.93178				-1.01024	-0.74765	0.784152	-0.86021	-0.39369	0.24974	-0.604	-0.84259	0.838578	0.158046	0.252261
-0.1885	-0.16525	-0.26968	0.696956	-0.59961	-0.66736	-1.16097	-0.6606	-0.71317	-0.87228	-0.86634	-0.91262				-1.03336	-0.66446	0.715979	-0.74898	-0.38114	0.226633	-0.64007	-0.86766	0.75069	0.137692	0.214023
-0.1803	-0.12346	-0.41083	0.76613	-0.60625	-0.66143	-1.17622	-0.63198	-0.62305	-0.91487	-0.88592	-0.86455				-0.99098	-0.54572	0.655359	-0.62322	-0.40127	0.218833	-0.69887	-0.94166	0.68337	0.111723	0.205069
-0.17218	-0.09885	-0.57441	0.878324	-0.60425	-0.62687	-1.19348	-0.61074	-0.58226	-0.91503	-0.8553	-0.80234				-0.87948	-0.43134	0.627099	-0.54677	-0.42506	0.210055	-0.76321	-1.02087	0.625466	0.086342	0.209678
-0.16398	-0.10191	-0.72845	0.94449	-0.61494	-0.57876	-1.21989	-0.5993	-0.5903	-0.87817	-0.80672	-0.75202				-0.72358	-0.35983	0.653557	-0.55287	-0.4298	0.19315	-0.80156	-1.05398	0.542468	0.052916	0.195006
-0.15577	-0.12889	-0.84117	0.916283	-0.64282	-0.54927	-1.25069	-0.59079	-0.60522	-0.8409	-0.78681	-0.72692				-0.57958	-0.35811	0.743056	-0.63445	-0.41803	0.17048	-0.79143	-1.03035	0.41013	0.013312	0.143933
-0.14757	-0.14646	-0.88529	0.817914	-0.66554	-0.55847	-1.28213	-0.57308	-0.57656	-0.84209	-0.81911	-0.72736				-0.49855	-0.44208	0.876967	-0.74677	-0.41272	0.147698	-0.74418	-0.98285	0.242378	-0.02247	0.076132
-0.13937	-0.12701	-0.87169	0.734775	-0.66845	-0.60916	-1.31638	-0.53395	-0.48392	-0.90313	-0.88214	-0.74557				-0.51523	-0.60038	0.985921	-0.8334	-0.4234	0.12363	-0.69213	-0.95919	0.064749	-0.03922	0.016919
-0.13117	-0.08115	-0.84272	0.744713	-0.6447	-0.67139	-1.35173	-0.46922	-0.34641	-1.0096	-0.93309	-0.78246				-0.61898	-0.76367	1.021376	-0.86917	-0.43731	0.095434	-0.66972	-0.98152	-0.10145	-0.05226	-0.01853
-0.12296	-0.03818	-0.83847	0.817235	-0.61593	-0.70979	-1.38051	-0.39243	-0.20718	-1.11893	-0.94905	-0.83582				-0.76875	-0.86249	0.968915	-0.85655	-0.43577	0.062493	-0.68655	-1.03414	-0.23494	-0.09779	-0.03563
-0.11476	-0.03317	-0.8694	0.878479	-0.61356	-0.70322	-1.38838	-0.31974	-0.11639	-1.18931	-0.93899	-0.89264				-0.91881	-0.87007	0.828317	-0.82893	-0.40559	0.023611	-0.72184	-1.11427	-0.31731	-0.18663	-0.04379
-0.10656	-0.0618	-0.92296	0.869776	-0.66451	-0.65537	-1.36616	-0.26473	-0.0964	-1.2058	-0.92454	-0.93075				-1.02157	-0.82432	0.632135	-0.82269	-0.36419	-0.01863	-0.75012	-1.23012	-0.33053	-0.29253	-0.04299
-0.09835	-0.08444	-0.97855	0.789353	-0.77368	-0.59777	-1.31728	-0.22962	-0.14186	-1.19209	-0.9303	-0.93607				-1.05446	-0.78396	0.442433	-0.85001	-0.33972	-0.06066	-0.75726	-1.3728	-0.27921	-0.3671	-0.03231
-0.09015	-0.07568	-1.00607	0.69586	-0.90366	-0.56123	-1.25538	-0.20667	-0.20094	-1.17782	-0.96822	-0.91857				-1.01332	-0.77327	0.364422	-0.89554	-0.34791	-0.09496	-0.75545	-1.5036	-0.19947	-0.39657	-0.01366
-0.08203	-0.04501	-1.00885	0.641653	-1.00237	-0.56213	-1.19603	-0.19701	-0.22756	-1.17956	-1.03274	-0.89402				-0.90505	-0.78952	0.460828	-0.92606	-0.38158	-0.12742	-0.76277	-1.56719	-0.15261	-0.40432	-0.0021
-0.07382	-0.03229	-1.01376	0.651606	-1.00794	-0.59569	-1.14541	-0.20849	-0.21185	-1.19416	-1.1073	-0.88011				-0.74485	-0.81695	0.686921	-0.92997	-0.41453	-0.17186	-0.7872	-1.55272	-0.18641	-0.4165	-0.00662
-0.06562	-0.05459	-1.0481	0.701816	-0.8962	-0.64691	-1.10207	-0.24816	-0.1647	-1.22157	-1.16739	-0.88771				-0.56115	-0.84717	0.920471	-0.89725	-0.4324	-0.23471	-0.81423	-1.49996	-0.29688	-0.43959	-0.02606
-0.05742	-0.08374	-1.09913	0.772534	-0.71609	-0.70034	-1.0547	-0.31111	-0.11015	-1.2655	-1.19737	-0.911				-0.40295	-0.87523	1.023867	-0.83007	-0.42916	-0.30494	-0.82194	-1.46025	-0.4318	-0.46108	-0.05308
-0.04922	-0.06746	-1.11159	0.837789	-0.5597	-0.73799	-0.9953	-0.38118	-0.06253	-1.3193	-1.19461	-0.92819				-0.30078	-0.8896	0.972809	-0.75257	-0.41438	-0.35448	-0.8071	-1.43028	-0.52917	-0.47931	-0.07525
-0.04101	0.013729	-1.05795	0.860471	-0.50177	-0.74854	-0.92976	-0.44006	-0.05035	-1.37424	-1.18361	-0.92007				-0.23882	-0.8993	0.834261	-0.69128	-0.3995	-0.36245	-0.77998	-1.38225	-0.58027	-0.49427	-0.08795
-0.03281	0.127816	-0.96067	0.828423	-0.54694	-0.72786	-0.86548	-0.47862	-0.0786	-1.41456	-1.18822	-0.88938				-0.18447	-0.92268	0.692521	-0.66913	-0.39571	-0.31965	-0.74426	-1.30525	-0.62193	-0.49384	-0.08964
-0.02461	0.237311	-0.88347	0.757504	-0.63966	-0.68616	-0.80428	-0.49794	-0.10621	-1.43289	-1.20027	-0.85348				-0.13579	-0.97714	0.600449	-0.68509	-0.42096	-0.2458	-0.69899	-1.22098	-0.69733	-0.46375	-0.07978
-0.0164	0.33201	-0.86877	0.692033	-0.70993	-0.63298	-0.73612	-0.50399	-0.09458	-1.42235	-1.19444	-0.82591				-0.11705	-1.04935	0.564429	-0.7225	-0.4662	-0.1707	-0.64341	-1.16022	-0.81252	-0.39967	-0.06037
-0.0082	0.432865	-0.89087	0.663024	-0.74415	-0.57797	-0.66474	-0.49955	-0.02302	-1.37462	-1.1551	-0.80484				-0.1323	-1.10288	0.550107	-0.76228	-0.50132	-0.1274	-0.57976	-1.11405	-0.934	-0.30567	-0.04407
0	0.536091	-0.89251	0.681633	-0.77243	-0.53158	-0.6118	-0.49372	0.074204	-1.29989	-1.10305	-0.77795				-0.15387	-1.11955	0.49283	-0.80195	-0.48289	-0.13158	-0.50919	-1.0631	-1.03391	-0.18099	-0.05173
0.00813	0.61657	-0.8479	0.737152	-0.81429	-0.50344	-0.5922	-0.49814	0.149136	-1.22576	-1.07082	-0.73838				-0.13152	-1.10926	0.381634	-0.84837	-0.37194	-0.17028	-0.42526	-0.96316	-1.09013	-0.03909	-0.09278
0.01633	0.657538	-0.80142	0.815368	-0.86431	-0.4954	-0.59473	-0.52335	0.187638	-1.19614	-1.076	-0.68467				-0.04838	-1.09161	0.273891	-0.88707	-0.17057	-0.22826	-0.32605	-0.72716	-1.09823	0.100252	-0.15262
0.02453	0.667176	-0.81221	0.897936	-0.8999	-0.48183	-0.57742	-0.56863	0.217043	-1.23274	-1.11797	-0.62594				0.096429	-1.06031	0.233482	-0.89404	0.083577	-0.29099	-0.22708	-0.286	-1.06913	0.215735	-0.19981
0.03273	0.684201	-0.88994	0.945632	-0.91761	-0.43412	-0.50773	-0.62061	0.276221	-1.32298	-1.17833	-0.5748				0.293594	-1.00188	0.25745	-0.85253	0.341867	-0.34839	-0.14588	0.361465	-1.02612	0.314401	-0.21214
0.04094	0.731325	-0.98695	0.955384	-0.9226	-0.35046	-0.39048	-0.66482	0.37253	-1.43668	-1.24459	-0.54891				0.510224	-0.92478	0.293139	-0.77111	0.584477	-0.38915	-0.08291	1.108651	-0.99378	0.439931	-0.19543
0.04914	0.809903	-1.04368	0.951989	-0.92685	-0.26657	-0.25358	-0.69216	0.495017	-1.53703	-1.29539	-0.54478				0.708269	-0.85735	0.319019	-0.69277	0.82629	-0.3955	-0.0182	1.815057	-0.97369	0.624634	-0.16309
0.05734	0.887633	-1.04854	0.959272	-0.93614	-0.22711	-0.1157	-0.69823	0.617213	-1.59738	-1.30392	-0.53726				0.853494	-0.81726	0.346976	-0.6664	1.100381	-0.35494	0.066663	2.406752	-0.96026	0.865784	-0.11733
0.06555	0.912094	-1.02917	0.969796	-0.94717	-0.22918	0.027697	-0.67303	0.716418	-1.60003	-1.26702	-0.51755				0.950599	-0.77896	0.411008	-0.70253	1.41523	-0.25957	0.177743	2.903662	-0.93209	1.121642	-0.0452
0.07375	0.876076	-1.01343	0.943039	-0.96782	-0.23736	0.176929	-0.61159	0.765653	-1.55048	-1.21538	-0.49691				1.026583	-0.70829	0.505488	-0.75779	1.727554	-0.11929	0.292855	3.341905	-0.86779	1.358001	0.050636
0.08195	0.829949	-1.01516	0.883432	-0.98437	-0.21578	0.316976	-0.51869	0.749041	-1.4686	-1.19486	-0.49808				1.085257	-0.60032	0.619573	-0.78665	1.973839	0.047843	0.384994	3.692981	-0.74644	1.564914	0.143679
0.09016	0.850947	-1.05136	0.820676	-0.97848	-0.15956	0.425025	-0.41091	0.687814	-1.37744	-1.22049	-0.5301				1.116415	-0.48879	0.765633	-0.76856	2.119091	0.219984	0.443883	3.909584	-0.55631	1.739205	0.200494
0.09836	0.949768	-1.13159	0.792732	-0.94236	-0.08889	0.48368	-0.30604	0.620375	-1.2905	-1.27096	-0.57893				1.109773	-0.41387	0.937958	-0.73064	2.204401	0.385733	0.487616	3.97952	-0.32459	1.888671	0.213325
0.10648	1.055461	-1.21668	0.80557	-0.87473	-0.0184	0.491493	-0.21488	0.574525	-1.20848	-1.31241	-0.62054				1.077419	-0.37679	1.122584	-0.70405	2.29856	0.542368	0.553282	3.92001	-0.1156	2.017306	0.205635
0.11468	1.102001	-1.24513	0.826833	-0.79789	0.057992	0.45898	-0.14801	0.524099	-1.12444	-1.33277	-0.64046				1.021452	-0.36356	1.3067	-0.6806	2.454623	0.694876	0.666816	3.759857	0.009867	2.129279	0.194992
0.12289	1.083987	-1.1815	0.830845	-0.73708	0.152307	0.411307	-0.10351	0.430606	-1.01831	-1.33814	-0.65293				0.945062	-0.34852	1.490059	-0.64287	2.676854	0.847726	0.835427	3.526595	0.05096	2.219676	0.181629
0.13109	1.046275	-1.07469	0.808024	-0.71876	0.262762	0.376571	-0.0758	0.302285	-0.8805	-1.33029	-0.68158				0.873341	-0.33096	1.64853	-0.58963	2.933374	0.995977	1.030603	3.263228	0.052975	2.274849	0.158653
0.13929	1.026153	-1.01155	0.787733	-0.74531	0.368078	0.373811	-0.05433	0.20258	-0.72405	-1.304	-0.73468				0.844438	-0.32116	1.727366	-0.54175	3.206946	1.136274	1.213185	3.015762	0.064434	2.299217	0.133265
0.1475	1.033325	-1.03359	0.832758	-0.80177	0.44053	0.390161	-0.02562	0.213313	-0.57946	-1.254	-0.78734				0.876871	-0.30735	1.71336	-0.50665	3.494514	1.27377	1.340147	2.801146	0.100595	2.31308	0.137219
0.1557	1.04587	-1.11681	0.982834	-0.87223	0.467982	0.39572	0.015034	0.337825	-0.46986	-1.19423	-0.80013				0.953046	-0.26421	1.638596	-0.46267	3.807564	1.422147	1.399599	2.587737	0.146207	2.344154	0.196862
0.1639	1.033899	-1.19475	1.181809	-0.94276	0.466649	0.377197	0.069875	0.512341	-0.38146	-1.14095	-0.75791				1.048584	-0.16266	1.575252	-0.39733	4.13967	1.582014	1.410194	2.357221	0.200418	2.399464	0.309834
0.1721	0.981768	-1.22586	1.283928	-0.99676	0.464189	0.340456	0.131521	0.651773	-0.29231	-1.10048	-0.68489				1.152783	-0.02108	1.55943	-0.32776	4.451597	1.736184	1.394061	2.12939	0.272446	2.458559	0.439762
0.18031	0.903303	-1.19347	1.187025	-1.00447	0.481194	0.299917	0.188752	0.714202	-0.19262	-1.0764	-0.6154				1.271518	0.104917	1.571565	-0.29228	4.694946	1.871609	1.37805	1.935336	0.36833	2.497496	0.542935
0.18851	0.85138	-1.10192	0.935911	-0.96383	0.516032	0.253153	0.224614	0.738063	-0.09616	-1.06192	-0.54979				1.398169	0.164418	1.593289	-0.30338	4.840447	1.983385	1.370831	1.786182	0.485061	2.514189	0.595444
0.19663	0.869808	-0.96975	0.69549	-0.91619	0.561676	0.195377	0.230403	0.778201	-0.02259	-1.04883	-0.46883				1.499266	0.155745	1.63473	-0.33975	4.90434	2.072344	1.377113	1.663853	0.618058	2.52368	0.602675
0.20484	0.944479	-0.82058	0.576722	-0.90416	0.613713	0.129353	0.214251	0.849559	0.024802	-1.0161	-0.37215				1.534529	0.125714	1.720569	-0.37759	4.932708	2.131284	1.395198	1.54704	0.770677	2.521118	0.592153
0.21304	1.000723	-0.70043	0.537837	-0.90967	0.659175	0.069154	0.194395	0.907568	0.034847	-0.94789	-0.29593				1.476656	0.116931	1.849252	-0.40182	4.956747	2.140782	1.43431	1.421735	0.922093	2.489822	0.584552
0.22124	0.977175	-0.64536	0.456581	-0.87377	0.687133	0.035945	0.186126	0.910318	-0.00341	-0.85801	-0.28334				1.361248	0.14776	1.985214	-0.40323	4.975491	2.09143	1.51965	1.288762	1.041294	2.415197	0.583433
0.22944	0.885619	-0.65458	0.273777	-0.77741	0.678554	0.023029	0.189254	0.878196	-0.08271	-0.78737	-0.33349				1.248389	0.215759	2.055189	-0.36066	4.966521	1.999533	1.664365	1.16018	1.107887	2.308328	0.569822
0.23765	0.773715	-0.69047	0.084986	-0.66294	0.63291	0.007141	0.187068	0.877038	-0.16292	-0.77388	-0.40638				1.171131	0.312495	2.013006	-0.26979	4.925245	1.898563	1.854325	1.028361	1.13035	2.2031	0.530089
0.24585	0.697067	-0.70886	0.0145	-0.60123	0.567022	-0.03149	0.159557	0.959553	-0.19984	-0.80389	-0.45293				1.130128	0.417334	1.891615	-0.16579	4.853952	1.818272	2.039013	0.898031	1.138948	2.130168	0.467293
0.25405	0.672569	-0.69313	0.113625	-0.60735	0.504409	-0.09001	0.103898	1.103161	-0.18924	-0.83835	-0.4553				1.089858	0.507489	1.771393	-0.1064	4.746799	1.766891	2.174199	0.78667	1.144153	2.103964	0.400147
0.26226	0.683006	-0.65833	0.320886	-0.63764	0.466028	-0.14634	0.03153	1.239509	-0.15698	-0.85651	-0.42213				1.041987	0.57559	1.733708	-0.12759	4.597467	1.742197	2.246367	0.710126	1.141816	2.113886	0.360297
0.27046	0.703919	-0.64187	0.533255	-0.67055	0.450588	-0.18528	-0.04059	1.307338	-0.13086	-0.87165	-0.36514				1.011213	0.614477	1.788963	-0.2156	4.436059	1.729387	2.277025	0.672187	1.137325	2.139861	0.36309
0.27866	0.707288	-0.63998	0.709346	-0.71365	0.452865	-0.2035	-0.0978	1.309386	-0.11691	-0.90588	-0.30289				1.029797	0.62493	1.903887	-0.3256	4.303538	1.711006	2.294091	0.64713	1.149295	2.148738	0.399019
0.28679	0.686714	-0.62674	0.854824	-0.78853	0.461389	-0.21146	-0.13944	1.300345	-0.10804	-0.94961	-0.26121				1.095485	0.606299	2.039298	-0.40267	4.220183	1.679536	2.305475	0.607766	1.188835	2.108494	0.436212
0.29499	0.638809	-0.58859	0.99075	-0.88886	0.46137	-0.21995	-0.174	1.309431	-0.10311	-0.95764	-0.26749				1.165864	0.570735	2.181602	-0.42775	4.158286	1.635955	2.303575	0.547486	1.237448	2.023561	0.454096
0.30319	0.564467	-0.53652	1.07642	-0.98087	0.4386	-0.23986	-0.21413	1.308317	-0.11093	-0.88176	-0.32717				1.21193	0.547046	2.329025	-0.40809	4.059172	1.594193	2.275529	0.486145	1.258835	1.92464	0.45414
0.3114	0.473316	-0.49017	1.051222	-1.03862	0.383902	-0.27693	-0.26117	1.225892	-0.13862	-0.72452	-0.41649				1.218674	0.55851	2.439836	-0.35649	3.894907	1.565273	2.225581	0.424669	1.224849	1.853963	0.437716
0.3196	0.387209	-0.45461	0.912996	-1.04504	0.309502	-0.32333	-0.30594	1.038661	-0.1736	-0.5334	-0.51198				1.188531	0.613293	2.484028	-0.29583	3.679151	1.555202	2.161913	0.360091	1.146084	1.826733	0.404072
0.3278	0.332029	-0.43476	0.735778	-1.01921	0.236034	-0.36292	-0.33811	0.806626	-0.20053	-0.36796	-0.60122				1.138416	0.687441	2.451062	-0.23574	3.451163	1.553525	2.087275	0.309718	1.053957	1.825275	0.349087
0.336	0.316716	-0.42615	0.640743	-0.9887	0.182493	-0.38746	-0.35346	0.628692	-0.20985	-0.27403	-0.67635				1.092091	0.762407	2.343471	-0.1814	3.263142	1.545777	1.993369	0.3013	0.970749	1.817569	0.282024
0.34421	0.326486	-0.42639	0.663765	-0.97066	0.14877	-0.40696	-0.35322	0.546211	-0.20778	-0.24982	-0.72437				1.076495	0.830682	2.190766	-0.1378	3.147467	1.52287	1.870059	0.346106	0.894481	1.776697	0.225023
0.35241	0.327483	-0.43114	0.724684	-0.95176	0.119034	-0.42749	-0.34589	0.492422	-0.2166	-0.26771	-0.73789				1.102962	0.88116	2.019376	-0.1202	3.100284	1.48279	1.726287	0.411422	0.812148	1.702844	0.190793
0.36061	0.2901	-0.41337	0.724298	-0.89716	0.0829	-0.44588	-0.34665	0.417557	-0.25009	-0.29052	-0.72759				1.157519	0.905133	1.878324	-0.14277	3.069464	1.433033	1.587627	0.457634	0.729899	1.613571	0.176327
0.36882	0.212577	-0.36622	0.651775	-0.80122	0.043557	-0.4587	-0.37354	0.335064	-0.30787	-0.30791	-0.71747				1.210431	0.885116	1.833843	-0.18768	2.996706	1.378304	1.483336	0.465875	0.671953	1.53607	0.175663
0.37694	0.116663	-0.30514	0.58615	-0.70379	0.016689	-0.47218	-0.42707	0.292766	-0.36771	-0.33054	-0.72699				1.258639	0.826845	1.935601	-0.22447	2.864406	1.325624	1.420374	0.453055	0.671183	1.490061	0.201461
0.38514	0.029456	-0.25487	0.602429	-0.66075	0.015952	-0.50147	-0.48675	0.322071	-0.39302	-0.36543	-0.75235				1.32161	0.755266	2.159699	-0.21496	2.706736	1.276141	1.384767	0.445959	0.737608	1.478119	0.264096
0.39334	-0.0394	-0.22278	0.721768	-0.68758	0.049371	-0.54818	-0.52805	0.385524	-0.32816	-0.41207	-0.78348				1.417103	0.699694	2.425664	-0.14862	2.580385	1.236182	1.358674	0.443159	0.851933	1.477877	0.347095
0.40155	-0.08318	-0.19167	0.89127	-0.76702	0.091174	-0.60129	-0.53831	0.428223	-0.12126	-0.44285	-0.81031				1.533086	0.664487	2.632523	-0.06383	2.508139	1.20652	1.341018	0.447145	0.984244	1.448189	0.417279
0.40975	-0.09997	-0.15274	1.041331	-0.86176	0.101153	-0.64205	-0.52772	0.433924	0.21794	-0.43749	-0.82522				1.625782	0.612035	2.703228	-0.01718	2.470701	1.174888	1.333784	0.465552	1.104697	1.359047	0.453042
0.41795	-0.08522	-0.10589	1.111894	-0.93466	0.067758	-0.6573	-0.51731	0.440883	0.606988	-0.40133	-0.82872				1.673416	0.509206	2.629565	-0.02772	2.43482	1.142761	1.335951	0.51243	1.209507	1.212013	0.461781
0.42616	-0.0367	-0.07727	1.07213	-0.96012	0.010948	-0.64592	-0.52257	0.464465	0.918602	-0.36136	-0.8246				1.669491	0.373244	2.468646	-0.05201	2.372163	1.114954	1.329357	0.584593	1.297766	1.060331	0.461566
0.43436	0.023451	-0.09608	0.959288	-0.92243	-0.03349	-0.61251	-0.54578	0.470388	1.080338	-0.36116	-0.81757				1.63239	0.267147	2.301687	-0.04067	2.277499	1.105772	1.295195	0.644508	1.359636	0.962522	0.467522
0.44256	0.07705	-0.17545	0.840273	-0.83919	-0.05826	-0.57767	-0.57779	0.436529	1.104781	-0.42248	-0.79836				1.58699	0.22758	2.186528	0.018027	2.15795	1.112568	1.23169	0.644009	1.373698	0.925173	0.481217
0.45077	0.106499	-0.2944	0.778752	-0.75221	-0.0787	-0.56134	-0.60528	0.375336	1.064867	-0.52866	-0.7608				1.552279	0.241044	2.122909	0.092367	2.036212	1.116605	1.150884	0.548287	1.321342	0.909453	0.506391
0.45897	0.110254	-0.40062	0.788905	-0.70752	-0.11072	-0.56727	-0.62047	0.340642	1.028129	-0.63053	-0.71633				1.541747	0.27448	2.075648	0.149372	1.941476	1.096194	1.069243	0.386542	1.213068	0.868935	0.543838
0.46709	0.089633	-0.4409	0.856058	-0.72275	-0.15959	-0.58658	-0.6303	0.374423	1.01555	-0.68959	-0.68918				1.534879	0.308567	2.024494	0.184505	1.888067	1.041407	0.989672	0.23385	1.078274	0.804506	0.572961
0.47529	0.039394	-0.40552	0.951279	-0.78246	-0.21173	-0.6034	-0.64045	0.467849	1.015841	-0.70825	-0.69727				1.509145	0.349537	2.0236	0.21497	1.861647	0.971519	0.912985	0.160355	0.949636	0.74513	0.570578
0.4835	-0.02808	-0.35092	1.028061	-0.87617	-0.25618	-0.61292	-0.65364	0.557134	1.007736	-0.71164	-0.72722				1.457553	0.385845	2.119758	0.246862	1.831395	0.903181	0.83741	0.202405	0.84428	0.709063	0.530358
0.4917	-0.08722	-0.34593	1.07284	-0.98921	-0.28471	-0.62071	-0.66873	0.569348	0.972253	-0.7243	-0.75194				1.395474	0.395463	2.277306	0.253204	1.788456	0.851889	0.77428	0.340477	0.758393	0.682068	0.477888
0.4999	-0.10253	-0.41114	1.076944	-1.09646	-0.2893	-0.63815	-0.68623	0.484862	0.901003	-0.75371	-0.75018				1.364767	0.364396	2.408783	0.240008	1.743576	0.821155	0.739113	0.502295	0.679984	0.626372	0.447822
0.50811	-0.06398	-0.50528	1.051083	-1.16193	-0.27284	-0.66265	-0.70527	0.331178	0.803558	-0.79848	-0.71938				1.390974	0.307851	2.421977	0.252725	1.708583	0.806816	0.740604	0.594821	0.601485	0.530988	0.447974
0.51631	0.010651	-0.57424	1.0309	-1.14878	-0.25187	-0.67904	-0.71355	0.184977	0.71229	-0.83384	-0.6786				1.480456	0.261263	2.314853	0.316723	1.663163	0.801044	0.775053	0.582907	0.530737	0.420655	0.456161
0.52451	0.082913	-0.6197	1.053891	-1.06677	-0.25243	-0.67777	-0.70491	0.104522	0.658238	-0.82217	-0.65091				1.593519	0.230995	2.157429	0.402634	1.581208	0.801743	0.821876	0.497997	0.481186	0.34284	0.433986
0.53272	0.114668	-0.67227	1.152769	-0.97048	-0.27799	-0.6632	-0.68343	0.099244	0.644598	-0.73275	-0.65732				1.667462	0.219586	2.045049	0.441116	1.473949	0.814989	0.858805	0.403951	0.458827	0.319368	0.366869
0.54092	0.101087	-0.74268	1.288773	-0.92266	-0.30926	-0.65444	-0.67411	0.142199	0.634911	-0.58103	-0.69925				1.656636	0.233069	2.025416	0.391517	1.376548	0.842123	0.867243	0.343494	0.452972	0.336134	0.269979
0.54912	0.062086	-0.80887	1.367144	-0.94597	-0.31899	-0.66529	-0.69735	0.195231	0.579041	-0.43844	-0.75967				1.570807	0.2833	2.078593	0.26931	1.325669	0.878486	0.861116	0.30773	0.437903	0.354494	0.172396
0.55724	0.017211	-0.84492	1.30641	-1.01036	-0.2935	-0.69882	-0.75299	0.249154	0.463021	-0.37138	-0.81905				1.479351	0.378934	2.174448	0.14166	1.313486	0.898655	0.865271	0.269292	0.398643	0.337768	0.099147
0.56545	-0.02467	-0.859	1.115165	-1.06318	-0.2515	-0.74376	-0.82693	0.280886	0.325795	-0.39914	-0.87563				1.448543	0.49888	2.255265	0.07085	1.305504	0.87683	0.900474	0.211718	0.343271	0.286079	0.057452
0.57365	-0.05766	-0.87054	0.898091	-1.076	-0.23354	-0.78042	-0.89091	0.262559	0.239207	-0.48003	-0.93802				1.489512	0.615404	2.272133	0.063766	1.284379	0.81305	0.965064	0.154716	0.295686	0.231252	0.046799
0.58185	-0.07303	-0.90566	0.766948	-1.0571	-0.2619	-0.79749	-0.92404	0.188818	0.232817	-0.55008	-0.99891				1.542491	0.692104	2.216164	0.101497	1.253132	0.745353	1.026811	0.129492	0.259686	0.208591	0.053771
0.59006	-0.05854	-0.97253	0.781545	-1.01937	-0.32094	-0.793	-0.92218	0.087754	0.274405	-0.56144	-1.03735				1.537664	0.71302	2.134796	0.153701	1.22524	0.724028	1.061194	0.149169	0.231843	0.22186	0.056603
0.59826	-0.00331	-1.05902	0.915481	-0.96754	-0.38554	-0.78049	-0.90082	0.019969	0.300685	-0.49642	-1.03325				1.44755	0.69271	2.105793	0.200455	1.195266	0.768439	1.054913	0.208409	0.210156	0.237704	0.036043
0.60646	0.073869	-1.1469	1.09364	-0.89852	-0.43911	-0.77012	-0.88471	0.021461	0.271179	-0.39267	-0.99529				1.291083	0.660724	2.163207	0.240866	1.162626	0.855458	1.023584	0.250884	0.192254	0.215297	-0.00725
0.61467	0.127317	-1.20114	1.219722	-0.82361	-0.47781	-0.76417	-0.8835	0.077054	0.207738	-0.30188	-0.94468				1.130782	0.649215	2.261003	0.279908	1.138629	0.937431	0.989477	0.226712	0.181473	0.145921	-0.04712
0.62287	0.115186	-1.19884	1.232683	-0.76426	-0.50401	-0.76342	-0.88847	0.13278	0.159542	-0.25805	-0.89102				0.999586	0.667213	2.303764	0.307874	1.130406	0.978909	0.963594	0.131022	0.159024	0.066295	-0.05748
0.63107	0.024656	-1.13941	1.145779	-0.72365	-0.51487	-0.76669	-0.88624	0.149002	0.16344	-0.25604	-0.83661				0.915731	0.702512	2.252417	0.311932	1.125139	0.976701	0.944407	0.010421	0.100987	0.006344	-0.03467
0.63927	-0.10953	-1.04965	1.017892	-0.69993	-0.52035	-0.78405	-0.88044	0.133448	0.211454	-0.26728	-0.7885				0.885667	0.725594	2.137905	0.312979	1.088106	0.94325	0.922002	-0.06238	0.011784	-0.02399	-0.00339
0.64748	-0.24392	-0.95668	0.919554	-0.69712	-0.53083	-0.82255	-0.88256	0.107561	0.269215	-0.28805	-0.76911				0.905097	0.725181	2.007447	0.340772	0.999519	0.895243	0.902205	-0.06419	-0.08072	-0.02918	0.014087
0.6556	-0.33768	-0.87498	0.866767	-0.73499	-0.5423	-0.88536	-0.89812	0.080505	0.307129	-0.33928	-0.79027				0.953024	0.707101	1.900571	0.397975	0.878925	0.850669	0.892297	-0.01201	-0.15301	-0.01667	0.009439
0.6638	-0.38852	-0.81119	0.849932	-0.81033	-0.53181	-0.96743	-0.91753	0.045188	0.310651	-0.43729	-0.83725				0.978532	0.687304	1.841754	0.45201	0.763968	0.818705	0.905049	0.059358	-0.20481	0.013358	-0.01733
0.67201	-0.4193	-0.76646	0.83299	-0.89075	-0.48008	-1.05648	-0.92984	-0.00782	0.292446	-0.56179	-0.88129				0.950419	0.684991	1.858044	0.474987	0.67676	0.799846	0.940154	0.134518	-0.23417	0.045745	-0.05932
0.68021	-0.45153	-0.7499	0.764016	-0.95077	-0.41353	-1.12921	-0.93982	-0.08636	0.27275	-0.67209	-0.90002				0.868379	0.695509	1.920728	0.474814	0.618183	0.780954	0.991491	0.212675	-0.24178	0.073577	-0.11132
0.68841	-0.50182	-0.76507	0.639925	-0.97512	-0.38122	-1.16478	-0.95194	-0.17705	0.264584	-0.73664	-0.90156				0.766075	0.704595	1.963076	0.480084	0.587675	0.747745	1.041018	0.283308	-0.23023	0.11956	-0.1612
0.69661	-0.56709	-0.80679	0.515772	-0.97508	-0.40982	-1.16248	-0.95531	-0.25549	0.271464	-0.74442	-0.90474				0.679051	0.69617	1.93395	0.507382	0.587284	0.697483	1.05771	0.337522	-0.21448	0.218343	-0.20227
0.70482	-0.62769	-0.85671	0.491269	-0.96521	-0.47949	-1.1327	-0.91977	-0.31373	0.295083	-0.70923	-0.92161				0.617817	0.671178	1.846968	0.528775	0.618837	0.636804	1.01702	0.360757	-0.23014	0.381176	-0.2383
0.71302	-0.6527	-0.88537	0.600192	-0.951	-0.54391	-1.09329	-0.82571	-0.3497	0.342557	-0.65589	-0.94797				0.597316	0.633365	1.781973	0.512561	0.661094	0.579446	0.916469	0.354212	-0.30254	0.568258	-0.26808
0.72122	-0.62262	-0.87157	0.754804	-0.9454	-0.58301	-1.06478	-0.68615	-0.36869	0.412376	-0.60276	-0.96793				0.632567	0.572745	1.767816	0.4594	0.6861	0.536996	0.79258	0.340144	-0.4279	0.737241	-0.28745
0.72943	-0.56336	-0.80928	0.849115	-0.95479	-0.60555	-1.05842	-0.53286	-0.36062	0.49355	-0.55534	-0.97945				0.724305	0.492382	1.763193	0.391839	0.676859	0.515671	0.689759	0.348156	-0.56651	0.85528	-0.29461
0.73763	-0.51953	-0.72662	0.85413	-0.97649	-0.62968	-1.06754	-0.39881	-0.30904	0.558611	-0.50881	-0.99318				0.851452	0.404788	1.69989	0.349869	0.634325	0.503145	0.634201	0.381298	-0.67605	0.922251	-0.30384
0.74575	-0.52527	-0.66232	0.851923	-0.98909	-0.65559	-1.0743	-0.29929	-0.23087	0.590771	-0.44869	-1.01857				0.981295	0.333824	1.566598	0.343329	0.580269	0.477541	0.614399	0.422015	-0.73098	0.964541	-0.32764
0.75395	-0.56298	-0.64673	0.909231	-0.97805	-0.67528	-1.07344	-0.23556	-0.16089	0.594457	-0.36766	-1.04744				1.07734	0.295956	1.438685	0.356895	0.525672	0.42421	0.602851	0.451307	-0.73778	1.013008	-0.35956
0.76216	-0.58542	-0.68192	1.006103	-0.95414	-0.68288	-1.0747	-0.20324	-0.12806	0.582611	-0.29559	-1.06292				1.113517	0.283648	1.403711	0.365951	0.481397	0.347456	0.582081	0.436635	-0.72782	1.093294	-0.37698
0.77036	-0.56779	-0.71996	1.067794	-0.93604	-0.68066	-1.09503	-0.18696	-0.12112	0.563667	-0.26235	-1.058				1.097492	0.28665	1.494146	0.354636	0.448394	0.275108	0.547016	0.368759	-0.72928	1.195005	-0.36121
0.77856	-0.53475	-0.71795	1.047534	-0.94159	-0.6752	-1.13859	-0.17418	-0.12151	0.524171	-0.27082	-1.03794				1.052035	0.292441	1.652877	0.332401	0.416039	0.22953	0.49919	0.27413	-0.75625	1.269349	-0.32471
0.78677	-0.53636	-0.66676	0.963053	-0.97657	-0.66709	-1.18614	-0.16386	-0.12835	0.45754	-0.29446	-1.00672				1.004198	0.289467	1.777571	0.309449	0.377009	0.215605	0.449308	0.199262	-0.7895	1.269362	-0.29811
0.79497	-0.59536	-0.59998	0.84967	-1.04427	-0.66003	-1.2262	-0.16285	-0.14055	0.375542	-0.28576	-0.9502				0.962338	0.251342	1.80173	0.279207	0.326777	0.205161	0.414505	0.184101	-0.8029	1.192815	-0.29815
0.80317	-0.70153	-0.55225	0.740654	-1.12798	-0.65698	-1.26312	-0.17326	-0.15996	0.295507	-0.21411	-0.85752				0.929263	0.177616	1.742252	0.21817	0.283205	0.170721	0.407665	0.216546	-0.79302	1.071181	-0.31733
0.81138	-0.81066	-0.51966	0.638876	-1.19292	-0.66541	-1.30319	-0.18629	-0.17658	0.230902	-0.08759	-0.72867				0.912235	0.116463	1.675042	0.123855	0.268811	0.111298	0.423584	0.243444	-0.77908	0.93069	-0.33862
0.81958	-0.88266	-0.4811	0.539782	-1.2061	-0.69084	-1.33096	-0.19542	-0.21007	0.169206	0.039719	-0.58605				0.913588	0.112746	1.634262	0.034059	0.290384	0.048059	0.4359	0.213663	-0.7883	0.786897	-0.35303
0.82778	-0.89569	-0.43163	0.464667	-1.16849	-0.72636	-1.31759	-0.19852	-0.29592	0.096016	0.118275	-0.45509				0.944261	0.158489	1.586988	-0.01327	0.336415	0.007338	0.419418	0.146037	-0.8109	0.647766	-0.35814
0.8359	-0.8526	-0.40716	0.45243	-1.12398	-0.76215	-1.25501	-0.19993	-0.41517	0.005384	0.134203	-0.34636				0.993745	0.192943	1.488794	-0.01411	0.374343	-0.01614	0.362026	0.096288	-0.81597	0.537302	-0.35375
0.84411	-0.78737	-0.43292	0.520278	-1.10544	-0.77945	-1.16615	-0.20299	-0.50496	-0.08628	0.088457	-0.26861				1.037804	0.163427	1.363756	-0.00384	0.381032	-0.03251	0.274452	0.074728	-0.79013	0.470573	-0.33584
0.85231	-0.72725	-0.48385	0.622303	-1.1126	-0.75723	-1.09915	-0.20832	-0.5287	-0.1581	0.002457	-0.22118				1.04731	0.066856	1.283861	-0.01498	0.353275	-0.04713	0.185397	0.060409	-0.75604	0.430028	-0.30717
0.86051	-0.68604	-0.52743	0.705581	-1.10292	-0.68859	-1.08356	-0.22424	-0.50893	-0.21378	-0.09645	-0.19478				0.999992	-0.04931	1.29246	-0.05662	0.311175	-0.04903	0.115048	0.037704	-0.74979	0.392758	-0.28316
0.86872	-0.66117	-0.56435	0.726489	-1.03187	-0.59293	-1.11343	-0.2573	-0.47087	-0.27178	-0.18086	-0.17167				0.907048	-0.14076	1.383252	-0.10552	0.27309	-0.02825	0.065423	0.027486	-0.76568	0.342618	-0.27968
0.87692	-0.65654	-0.61897	0.687497	-0.90771	-0.5167	-1.15895	-0.30387	-0.41194	-0.35259	-0.22418	-0.12786				0.78467	-0.19038	1.498025	-0.14245	0.250224	0.000452	0.021034	0.049629	-0.7743	0.281164	-0.30601
0.88512	-0.68371	-0.68994	0.640727	-0.77942	-0.49313	-1.19109	-0.34436	-0.31901	-0.45548	-0.21048	-0.04703				0.676051	-0.17901	1.58469	-0.17121	0.253927	0.018644	-0.0195	0.074363	-0.75839	0.212297	-0.35007
0.89333	-0.73414	-0.7482	0.593356	-0.71523	-0.52929	-1.20307	-0.36998	-0.20486	-0.56497	-0.1555	0.071824				0.614378	-0.09974	1.596536	-0.18903	0.293988	0.015085	-0.0357	0.046081	-0.73792	0.142417	-0.3925
0.90153	-0.78722	-0.76526	0.522885	-0.73583	-0.59806	-1.20111	-0.38629	-0.12651	-0.65695	-0.09056	0.204529				0.583727	0.02796	1.510105	-0.19317	0.370015	-0.00647	0.004716	-0.05791	-0.74179	0.077727	-0.41576
0.90973	-0.81405	-0.74542	0.406293	-0.80033	-0.66677	-1.18732	-0.39983	-0.12662	-0.71674	-0.02242	0.314424				0.548678	0.158186	1.363289	-0.17603	0.450278	-0.03433	0.106046	-0.18671	-0.7701	0.018861	-0.42083
0.91794	-0.80493	-0.72123	0.283005	-0.84229	-0.72102	-1.15702	-0.40886	-0.20413	-0.73748	0.051465	0.378681				0.488009	0.237713	1.230946	-0.14167	0.48869	-0.04888	0.234664	-0.25937	-0.79821	-0.03478	-0.42776
0.92606	-0.77471	-0.69889	0.247499	-0.83023	-0.75298	-1.11016	-0.41002	-0.31217	-0.7148	0.112337	0.396837				0.430947	0.252086	1.179282	-0.10051	0.461253	-0.03583	0.35658	-0.23402	-0.79222	-0.08545	-0.44739
0.93426	-0.73472	-0.67053	0.352117	-0.8077	-0.76056	-1.05979	-0.41761	-0.41214	-0.65744	0.119847	0.392947				0.418374	0.213153	1.18557	-0.05747	0.387905	0.004368	0.450758	-0.16456	-0.73411	-0.13033	-0.47714
0.94246	-0.68992	-0.62613	0.549796	-0.82286	-0.75049	-1.02347	-0.4441	-0.4703	-0.58179	0.058765	0.384522				0.449047	0.158571	1.196467	-0.02064	0.318268	0.061799	0.534172	-0.15344	-0.63141	-0.17233	-0.50108
0.95067	-0.63655	-0.5765	0.715071	-0.87827	-0.73853	-1.00812	-0.48975	-0.46736	-0.5164	-0.02474	0.375639				0.462714	0.112305	1.216334	0.0086	0.281577	0.123356	0.62442	-0.24363	-0.52497	-0.22384	-0.50954
0.95887	-0.57892	-0.53974	0.750468	-0.93262	-0.7362	-1.0026	-0.53465	-0.43995	-0.48644	-0.07334	0.366323				0.398278	0.06882	1.284989	0.011668	0.288657	0.187826	0.724239	-0.37756	-0.46128	-0.27941	-0.50818
0.96707	-0.52564	-0.52471	0.661234	-0.94057	-0.73957	-0.98767	-0.55475	-0.43538	-0.50122	-0.07853	0.350298				0.26344	0.025133	1.425202	-0.03285	0.325995	0.261772	0.803216	-0.44705	-0.46259	-0.31702	-0.50872
0.97528	-0.49951	-0.53321	0.515386	-0.90196	-0.73853	-0.95335	-0.56019	-0.45999	-0.55724	-0.08773	0.312641				0.12037	-0.01645	1.595188	-0.11598	0.373163	0.346468	0.831211	-0.42252	-0.51397	-0.32575	-0.5189
0.98348	-0.50893	-0.55039	0.381836	-0.85072	-0.73127	-0.90522	-0.57594	-0.4562	-0.63967	-0.13114	0.243578				0.016769	-0.03907	1.728246	-0.20924	0.410097	0.440273	0.806731	-0.37674	-0.55536	-0.33136	-0.53588
0.99168	-0.54172	-0.57079	0.283545	-0.81963	-0.72879	-0.87004	-0.61464	-0.36182	-0.72594	-0.19148	0.149865				-0.04442	-0.03377	1.784945	-0.26833	0.417425	0.550899	0.746019	-0.40292	-0.54104	-0.36399	-0.55567
0.99989	-0.60034	-0.58955	0.214926	-0.8132	-0.72502	-0.87096	-0.66048	-0.19664	-0.79183	-0.24625	0.052514				-0.06421	-0.00853	1.764362	-0.26239	0.413224	0.702965	0.692188	-0.51463	-0.47398	-0.41395	-0.57637
1.00809	-0.69392	-0.5979	0.147402	-0.82411	-0.69256	-0.91106	-0.69367	-0.05447	-0.83072	-0.29721	-0.02916				-0.02944	0.012945	1.69956	-0.19283	0.430006	0.906624	0.671889	-0.6375	-0.39187	-0.44596	-0.60189
1.01621	-0.82927	-0.59988	0.056625	-0.83257	-0.61053	-0.95972	-0.71082	-0.04398	-0.86032	-0.36681	-0.09754				0.059452	0.002877	1.622416	-0.09044	0.474118	1.134056	0.689544	-0.70902	-0.32779	-0.44198	-0.63672
1.02441	-0.97153	-0.60649	-0.06066	-0.824	-0.49414	-0.97864	-0.72053	-0.17985	-0.89842	-0.44613	-0.16244				0.183475	-0.03444	1.55156	0.005895	0.507604	1.332079	0.72696	-0.73167	-0.28233	-0.42937	-0.67247
1.03261	-1.05383	-0.63511	-0.16435	-0.80492	-0.3996	-0.95639	-0.72625	-0.36841	-0.9621	-0.50023	-0.21835				0.303518	-0.07676	1.479658	0.061935	0.48247	1.468703	0.767896	-0.74365	-0.25475	-0.4429	-0.69294
1.04082	-1.03272	-0.68127	-0.18577	-0.78139	-0.36649	-0.90934	-0.71466	-0.49193	-1.04806	-0.51673	-0.25958				0.416614	-0.10007	1.421446	0.045605	0.394608	1.538455	0.805671	-0.77156	-0.2548	-0.4955	-0.69147
1.04902	-0.92459	-0.71654	-0.07958	-0.76531	-0.39722	-0.86866	-0.68203	-0.48562	-1.13609	-0.50598	-0.28285				0.535755	-0.10001	1.409503	-0.05251	0.284058	1.548442	0.835678	-0.80008	-0.30542	-0.56709	-0.68644
1.05722	-0.80544	-0.71517	0.140443	-0.75242	-0.4565	-0.84558	-0.64475	-0.36833	-1.20119	-0.49004	-0.28862				0.652674	-0.09203	1.450504	-0.19741	0.209303	1.502454	0.862038	-0.8134	-0.42119	-0.62997	-0.6972
1.06543	-0.73255	-0.68628	0.384814	-0.73173	-0.50178	-0.83568	-0.63071	-0.21912	-1.22363	-0.48547	-0.27057				0.730812	-0.10055	1.499635	-0.32333	0.200638	1.41247	0.882655	-0.80511	-0.57441	-0.6772	-0.72113
1.07363	-0.72744	-0.67567	0.573651	-0.70681	-0.51381	-0.8379	-0.64613	-0.11822	-1.20499	-0.50987	-0.23286				0.720279	-0.12963	1.496416	-0.38306	0.255007	1.296557	0.897558	-0.79274	-0.71734	-0.7076	-0.74414
1.08183	-0.76955	-0.71277	0.685182	-0.70069	-0.4923	-0.85327	-0.66501	-0.07827	-1.16259	-0.57604	-0.20779				0.631327	-0.15321	1.447862	-0.38222	0.346885	1.18303	0.902959	-0.79695	-0.81512	-0.72843	-0.75691
1.09004	-0.81885	-0.79032	0.722184	-0.74616	-0.45845	-0.88032	-0.65717	-0.06131	-1.12382	-0.66933	-0.23269				0.529384	-0.14785	1.414938	-0.35257	0.441137	1.091112	0.893291	-0.80546	-0.86314	-0.74119	-0.77529
1.09824	-0.86151	-0.86136	0.701523	-0.82944	-0.42656	-0.90471	-0.6139	-0.02321	-1.0951	-0.75732	-0.31416				0.475446	-0.09636	1.450655	-0.31626	0.507398	1.019446	0.861346	-0.78426	-0.88028	-0.74472	-0.81696
1.1064	-0.89279	-0.89723	0.613986	-0.91022	-0.40077	-0.9164	-0.55743	0.053839	-1.07419	-0.81726	-0.41028				0.484174	-0.0071	1.52235	-0.27265	0.528494	0.957826	0.805722	-0.69724	-0.89263	-0.74559	-0.88478
1.11456	-0.9194	-0.90868	0.499462	-0.9357	-0.37796	-0.91909	-0.51301	0.138948	-1.06865	-0.85975	-0.46979				0.520644	0.086332	1.550624	-0.24337	0.513198	0.895296	0.736162	-0.55807	-0.9167	-0.75213	-0.95799
1.12277	-0.95094	-0.91205	0.440071	-0.87167	-0.35703	-0.92262	-0.49163	0.189542	-1.08826	-0.90746	-0.47746				0.553121	0.159498	1.530537	-0.25605	0.474559	0.827242	0.670428	-0.4135	-0.93822	-0.7795	-1.00439
1.13097	-0.98009	-0.91495	0.474326	-0.74797	-0.34919	-0.92767	-0.49037	0.181158	-1.13293	-0.96959	-0.4544				0.56839	0.209491	1.504877	-0.29935	0.427838	0.749164	0.625952	-0.3074	-0.93632	-0.8261	-1.00745
1.13917	-0.99055	-0.91646	0.56805	-0.61879	-0.35851	-0.9262	-0.50028	0.132067	-1.18388	-1.02992	-0.43692				0.570477	0.263127	1.494393	-0.33034	0.384664	0.669561	0.598424	-0.24121	-0.90412	-0.8667	-0.97145
1.14738	-0.96598	-0.93597	0.64298	-0.53039	-0.37697	-0.92009	-0.51634	0.064985	-1.22309	-1.06586	-0.44082				0.556426	0.333099	1.467482	-0.30644	0.344824	0.601407	0.567961	-0.20598	-0.85774	-0.87164	-0.91816
1.15558	-0.92216	-0.98571	0.677575	-0.49711	-0.38911	-0.91358	-0.53263	-0.00245	-1.24274	-1.07566	-0.46418				0.528301	0.407431	1.380156	-0.24762	0.309618	0.556923	0.52226	-0.22077	-0.82247	-0.82921	-0.87425
1.16378	-0.88488	-1.05582	0.71416	-0.5034	-0.38929	-0.9098	-0.54175	-0.04715	-1.24969	-1.06714	-0.49521				0.509311	0.458571	1.245048	-0.21091	0.27636	0.544901	0.462583	-0.29928	-0.82241	-0.75855	-0.85184
1.17199	-0.87396	-1.12966	0.787671	-0.51425	-0.38246	-0.90511	-0.54467	-0.06756	-1.25623	-1.04614	-0.5174				0.520024	0.471842	1.114659	-0.23025	0.25279	0.566542	0.400523	-0.4325	-0.85887	-0.6859	-0.84653
1.18019	-0.87328	-1.18745	0.849701	-0.50707	-0.37018	-0.89765	-0.5492	-0.05452	-1.26391	-1.00522	-0.51944				0.555095	0.467868	1.039345	-0.30006	0.243123	0.615168	0.340452	-0.5727	-0.8997	-0.61706	-0.84478
1.18839	-0.84901	-1.22103	0.815183	-0.48987	-0.35336	-0.89679	-0.56407	-0.00104	-1.2792	-0.94806	-0.49613				0.578021	0.474678	1.011883	-0.38674	0.244729	0.666881	0.283925	-0.67458	-0.91648	-0.54339	-0.84285
1.1966	-0.79358	-1.21941	0.688453	-0.46878	-0.33543	-0.91487	-0.58654	0.07319	-1.30646	-0.90774	-0.44408				0.558399	0.512969	0.999363	-0.45927	0.261248	0.704584	0.236857	-0.72673	-0.90646	-0.46407	-0.84263
1.20472	-0.73087	-1.17604	0.561214	-0.44814	-0.32044	-0.95262	-0.607	0.141966	-1.34787	-0.92005	-0.35644				0.49394	0.577159	0.988562	-0.48537	0.287207	0.720054	0.200132	-0.73255	-0.89698	-0.39874	-0.84932
1.21292	-0.70403	-1.11448	0.509538	-0.42286	-0.30534	-0.98646	-0.62284	0.179855	-1.40591	-0.99393	-0.24446				0.417494	0.629565	0.988039	-0.45247	0.316861	0.721962	0.162926	-0.70436	-0.9202	-0.37204	-0.86984
1.22112	-0.72723	-1.07543	0.508211	-0.37753	-0.28721	-0.99357	-0.63752	0.183796	-1.4788	-1.08265	-0.13338				0.384892	0.632787	1.014552	-0.38632	0.34729	0.717005	0.116939	-0.64757	-0.97288	-0.38915	-0.90433
1.22933	-0.7874	-1.08984	0.488676	-0.30648	-0.27099	-0.96902	-0.65743	0.155627	-1.56728	-1.13989	-0.04794				0.421272	0.577857	1.072283	-0.32202	0.376881	0.695875	0.066776	-0.59488	-1.02775	-0.42403	-0.9509
1.23753	-0.85219	-1.13896	0.441644	-0.22463	-0.26124	-0.92334	-0.68438	0.105279	-1.6497	-1.17118	-0.00285				0.50648	0.49755	1.153719	-0.27389	0.405725	0.662271	0.029267	-0.57468	-1.04374	-0.44836	-0.99959
1.24573	-0.89138	-1.1889	0.437015	-0.15476	-0.26811	-0.87043	-0.71286	0.049441	-1.69455	-1.20155	0.005407				0.575608	0.430624	1.214545	-0.2231	0.427362	0.622144	0.008215	-0.58176	-0.99251	-0.44129	-1.03445
1.25394	-0.89345	-1.23359	0.553191	-0.09387	-0.27802	-0.80696	-0.73527	-0.01942	-1.68101	-1.23653	-0.01537				0.571728	0.39517	1.194527	-0.16212	0.435991	0.587851	-0.01126	-0.6043	-0.85405	-0.40251	-1.04158
1.26214	-0.85647	-1.28084	0.764186	-0.04154	-0.27046	-0.72893	-0.74833	-0.12303	-1.6186	-1.25251	-0.04236				0.506796	0.387892	1.064193	-0.11111	0.429878	0.561601	-0.05011	-0.62755	-0.60991	-0.35302	-1.03017
1.27034	-0.80573	-1.3184	1.002971	-0.00766	-0.24466	-0.64734	-0.75557	-0.26758	-1.54767	-1.23942	-0.05071				0.424542	0.409056	0.868602	-0.10825	0.417382	0.533427	-0.11098	-0.64729	-0.27539	-0.31378	-1.02494
1.27855	-0.77723	-1.29973	1.215201	-0.01533	-0.22053	-0.58176	-0.76235	-0.41933	-1.51238	-1.2145	-0.03272				0.366319	0.460737	0.719446	-0.1769	0.406194	0.496059	-0.16385	-0.65485	0.102092	-0.29908	-1.03621
1.28675	-0.7934	-1.21294	1.366496	-0.08583	-0.21756	-0.54511	-0.77764	-0.55219	-1.5364	-1.20472	-0.01031				0.326376	0.504497	0.701959	-0.30355	0.397963	0.447049	-0.18279	-0.63821	0.452678	-0.30489	-1.05452
1.29487	-0.85403	-1.10181	1.422323	-0.17554	-0.22988	-0.52527	-0.80476	-0.69177	-1.60338	-1.218	-0.0287				0.288745	0.480387	0.834013	-0.44118	0.389889	0.396866	-0.16244	-0.6002	0.732543	-0.33192	-1.05761
1.30307	-0.92554	-1.03412	1.343736	-0.21616	-0.24294	-0.499	-0.84382	-0.88756	-1.67	-1.23778	-0.10813				0.255896	0.349519	1.043046	-0.51956	0.382937	0.35482	-0.12869	-0.5682	0.937911	-0.38273	-1.03974
1.31128	-0.97601	-1.03261	1.13683	-0.17918	-0.24775	-0.45607	-0.88767	-1.13314	-1.69182	-1.25577	-0.21764				0.226204	0.167593	1.181099	-0.50577	0.386775	0.3299	-0.11467	-0.57271	1.076826	-0.441	-1.01162
1.31948	-0.97909	-1.06049	0.836508	-0.10692	-0.25304	-0.41681	-0.93113	-1.33847	-1.65332	-1.26983	-0.3009				0.18846	0.050519	1.169968	-0.42184	0.411412	0.326536	-0.14598	-0.59928	1.150015	-0.48356	-0.98656
1.32768	-0.93371	-1.08082	0.53415	-0.06482	-0.27978	-0.40798	-0.97686	-1.43001	-1.58349	-1.27549	-0.32643				0.122219	0.060982	1.051769	-0.34251	0.462802	0.32969	-0.2205	-0.60111	1.151555	-0.48765	-0.9767
1.33588	-0.85901	-1.09137	0.349571	-0.06734	-0.32372	-0.43523	-1.02132	-1.41182	-1.52802	-1.26448	-0.31401				0.038804	0.160499	0.950465	-0.33643	0.523995	0.320486	-0.30803	-0.54569	1.09044	-0.46245	-0.97871
1.34409	-0.77673	-1.12149	0.330314	-0.08817	-0.36625	-0.48349	-1.06019	-1.37816	-1.51719	-1.23513	-0.30244				-0.01725	0.238511	0.937064	-0.38879	0.566252	0.291213	-0.3803	-0.45363	0.999117	-0.44274	-0.97969
1.35229	-0.70453	-1.1751	0.423375	-0.09175	-0.40101	-0.5244	-1.08166	-1.403	-1.54245	-1.19257	-0.31914				-0.01952	0.226415	0.984902	-0.43554	0.576551	0.252374	-0.41895	-0.36931	0.916784	-0.44563	-0.96804
1.36049	-0.65551	-1.23806	0.495003	-0.08021	-0.44189	-0.54079	-1.08179	-1.46235	-1.57622	-1.14856	-0.36144				0.017637	0.148099	1.031172	-0.42745	0.558454	0.219548	-0.43279	-0.32245	0.863182	-0.45924	-0.95117
1.3687	-0.64297	-1.30013	0.433559	-0.07667	-0.5006	-0.53592	-1.06699	-1.49233	-1.59634	-1.12593	-0.40485				0.041984	0.085194	1.055167	-0.37799	0.536846	0.206601	-0.43088	-0.3241	0.812183	-0.45934	-0.95492
1.3769	-0.66912	-1.35691	0.237146	-0.08807	-0.56754	-0.52988	-1.04677	-1.43747	-1.58231	-1.13384	-0.43152				0.013938	0.118299	1.116888	-0.33085	0.520221	0.211484	-0.42336	-0.34694	0.723148	-0.44473	-0.98785
1.38502	-0.72161	-1.40585	0.00623	-0.11137	-0.61764	-0.53805	-1.03414	-1.31639	-1.52046	-1.16781	-0.43483				-0.06874	0.257207	1.220324	-0.31458	0.497845	0.224405	-0.42004	-0.37015	0.58112	-0.43102	-1.03
1.39323	-0.7739	-1.4216	-0.15344	-0.14918	-0.62329	-0.56198	-1.03104	-1.20665	-1.39998	-1.20166	-0.41507				-0.16415	0.466225	1.292529	-0.34663	0.468382	0.238266	-0.42807	-0.40022	0.432355	-0.436	-1.04834
1.40143	-0.80662	-1.38484	-0.21126	-0.20751	-0.57956	-0.59733	-1.03674	-1.18059	-1.23474	-1.2042	-0.38326				-0.23567	0.698996	1.276775	-0.42288	0.444321	0.244862	-0.46213	-0.4553	0.343509	-0.45864	-1.03305
1.40963	-0.82996	-1.29748	-0.18009	-0.26487	-0.49045	-0.63001	-1.04433	-1.25475	-1.0544	-1.17828	-0.36967				-0.26953	0.944167	1.191197	-0.52712	0.448984	0.240873	-0.51356	-0.5415	0.340746	-0.47859	-0.99877
1.41783	-0.85724	-1.18898	-0.10632	-0.29708	-0.36547	-0.65434	-1.04782	-1.38829	-0.88652	-1.1436	-0.39612				-0.27689	1.239862	1.096979	-0.63569	0.484951	0.222165	-0.56587	-0.62588	0.381685	-0.481	-0.96396
1.42604	-0.88771	-1.10962	-0.02292	-0.29739	-0.22078	-0.6729	-1.04292	-1.53536	-0.72973	-1.10992	-0.45372				-0.2819	1.629677	1.0368	-0.71927	0.548155	0.185965	-0.60203	-0.68029	0.393088	-0.46757	-0.94279
1.43424	-0.90294	-1.0746	0.077456	-0.28078	-0.07601	-0.68732	-1.03035	-1.64936	-0.53468	-1.05919	-0.50546				-0.28376	2.129976	1.021872	-0.75684	0.645151	0.137496	-0.61733	-0.69329	0.354289	-0.45482	-0.94476
1.44244	-0.87548	-1.05361	0.223659	-0.26986	0.043039	-0.69886	-1.01866	-1.69809	-0.25002	-0.97616	-0.52122				-0.28905	2.697834	1.02787	-0.74332	0.800524	0.08766	-0.6219	-0.68432	0.296931	-0.44364	-0.97278
1.45065	-0.79237	-1.00452	0.396742	-0.26637	0.115862	-0.7021	-1.01479	-1.67884	0.116385	-0.88063	-0.5194				-0.30671	3.258358	1.026618	-0.68524	1.049744	0.0524	-0.62722	-0.68341	0.262491	-0.41949	-1.00711
1.45885	-0.67059	-0.92961	0.518642	-0.27016	0.128989	-0.69785	-1.02207	-1.61382	0.495915	-0.80944	-0.53672				-0.33708	3.756115	0.994465	-0.59176	1.398959	0.040048	-0.64142	-0.6926	0.2614	-0.35651	-1.02697
1.46705	-0.5815	-0.87029	0.546278	-0.27613	0.101609	-0.6869	-1.03696	-1.55123	0.800217	-0.79713	-0.58562				-0.37519	4.153502	0.926319	-0.49934	1.816397	0.046203	-0.65721	-0.71498	0.271516	-0.24353	-1.03474
1.47518	-0.58574	-0.86258	0.488244	-0.28841	0.073286	-0.67369	-1.05411	-1.52169	0.985329	-0.83981	-0.63363				-0.40763	4.445718	0.848982	-0.4549	2.253481	0.053888	-0.67953	-0.74669	0.278644	-0.10372	-1.0543
1.48338	-0.67457	-0.89157	0.396865	-0.31335	0.071868	-0.66425	-1.06573	-1.51301	1.064248	-0.89498	-0.63542				-0.43504	4.636721	0.785941	-0.47869	2.653625	0.037257	-0.71248	-0.78185	0.278567	0.03881	-1.09598
1.49158	-0.77797	-0.8963	0.296599	-0.34272	0.104678	-0.66144	-1.06619	-1.49636	1.078604	-0.90768	-0.57993				-0.45162	4.736724	0.76899	-0.55356	2.986066	-0.00833	-0.75386	-0.81306	0.270816	0.155653	-1.13392
1.49978	-0.82312	-0.83766	0.149624	-0.3568	0.149628	-0.67296	-1.05974	-1.47189	1.053676	-0.84527	-0.49147				-0.46418	4.745387	0.821314	-0.63961	3.245585	-0.06459	-0.78749	-0.82914	0.252144	0.206833	-1.13859
1.50799	-0.80488	-0.71931	-0.05875	-0.3126	0.182511	-0.69527	-1.05659	-1.44295	0.990846	-0.72699	-0.41758				-0.48483	4.689677	0.944164	-0.70784	3.448988	-0.10222	-0.79336	-0.82864	0.2264	0.152183	-1.10647
1.51619	-0.76632	-0.57292	-0.30463	-0.20073	0.194244	-0.71632	-1.06484	-1.39493	0.888563	-0.61191	-0.39237				-0.51002	4.622532	1.117177	-0.73733	3.614525	-0.10257	-0.76855	-0.81336	0.211072	-0.00728	-1.06513
1.52439	-0.75302	-0.42786	-0.51251	-0.06808	0.193422	-0.7209	-1.07903	-1.32723	0.762304	-0.55976	-0.41706				-0.53223	4.594676	1.272689	-0.72029	3.762549	-0.0818	-0.72979	-0.78386	0.213619	-0.1961	-1.04804
1.5326	-0.7843	-0.30776	-0.62765	0.01843	0.201416	-0.70792	-1.08663	-1.25142	0.634365	-0.57745	-0.46456				-0.5247	4.619191	1.348828	-0.66291	3.891509	-0.07793	-0.70404	-0.72922	0.222888	-0.31669	-1.06186
1.5408	-0.85732	-0.23796	-0.67945	0.004955	0.232387	-0.69236	-1.08578	-1.20303	0.51723	-0.64104	-0.49648				-0.46754	4.654654	1.330722	-0.58912	3.981724	-0.11909	-0.69794	-0.65745	0.217116	-0.31571	-1.09473
1.549	-0.96925	-0.23543	-0.72198	-0.10998	0.287493	-0.69197	-1.08465	-1.2036	0.418317	-0.72229	-0.49295				-0.3712	4.660464	1.269937	-0.54399	4.012949	-0.19784	-0.71032	-0.59749	0.176933	-0.21358	-1.12097
1.55721	-1.08912	-0.29706	-0.77858	-0.30321	0.33866	-0.71132	-1.09186	-1.22585	0.336319	-0.80272	-0.45962				-0.28464	4.617465	1.219443	-0.53896	3.978468	-0.28618	-0.739	-0.5759	0.10524	-0.07363	-1.11909
1.56533	-1.16939	-0.38785	-0.80939	-0.54017	0.350221	-0.73985	-1.1015	-1.23608	0.269943	-0.86851	-0.42072				-0.2612	4.542454	1.18795	-0.5594	3.892689	-0.3597	-0.77633	-0.59524	0.017968	0.052353	-1.08566
1.57353	-1.18903	-0.4501	-0.78509	-0.76117	0.314276	-0.76848	-1.10297	-1.23121	0.213327	-0.89904	-0.39974				-0.31829	4.477997	1.167657	-0.58757	3.776246	-0.40887	-0.82006	-0.62105	-0.06986	0.134195	-1.03702
1.58173	-1.17662	-0.44925	-0.71824	-0.88393	0.257885	-0.79371	-1.09542	-1.2537	0.139482	-0.89182	-0.40622				-0.43144	4.454291	1.121469	-0.62389	3.655226	-0.43315	-0.86467	-0.61438	-0.15074	0.161366	-0.99724
1.58994	-1.17145	-0.38101	-0.64948	-0.86661	0.207638	-0.82057	-1.08374	-1.32478	0.01797	-0.85282	-0.43852				-0.53838	4.468158	1.016052	-0.68236	3.554029	-0.4271	-0.89703	-0.54347	-0.21186	0.136678	-0.96598
1.59814	-1.18337	-0.27341	-0.62352	-0.74885	0.164904	-0.85007	-1.07397	-1.42717	-0.15768	-0.78238	-0.48485				-0.58543	4.459375	0.868836	-0.74739	3.481599	-0.39493	-0.90455	-0.41502	-0.25317	0.082401	-0.92504
1.60634	-1.19348	-0.14432	-0.66555	-0.62201	0.120989	-0.87749	-1.07013	-1.52536	-0.34235	-0.66479	-0.52647				-0.56252	4.372827	0.742725	-0.79039	3.44478	-0.3421	-0.87815	-0.2707	-0.27513	0.02394	-0.86215
1.61455	-1.16825	-0.00811	-0.77981	-0.56383	0.071046	-0.90502	-1.07482	-1.56968	-0.47922	-0.48534	-0.53804				-0.50284	4.214682	0.708783	-0.79802	3.428986	-0.28042	-0.82248	-0.15602	-0.28146	-0.03798	-0.78524
1.62275	-1.09725	0.10789	-0.92197	-0.57949	0.034771	-0.93285	-1.09406	-1.56453	-0.53389	-0.25608	-0.50687				-0.45641	4.046129	0.77382	-0.79574	3.415225	-0.22453	-0.7625	-0.11708	-0.28735	-0.12288	-0.71221
1.63095	-0.99734	0.19226	-1.01593	-0.61989	0.034126	-0.95935	-1.12566	-1.54441	-0.5027	-0.00638	-0.43419				-0.44053	3.919978	0.877958	-0.81275	3.404413	-0.18786	-0.72671	-0.15096	-0.3013	-0.23814	-0.65787
1.63916	-0.90291	0.255623	-0.97835	-0.63455	0.060671	-0.98279	-1.15505	-1.54483	-0.41085	0.247641	-0.34233				-0.45586	3.82439	0.934711	-0.84686	3.420186	-0.1866	-0.71736	-0.20604	-0.32424	-0.34963	-0.62627
1.64736	-0.84163	0.321698	-0.78305	-0.60151	0.078662	-0.99798	-1.16461	-1.59305	-0.29538	0.503723	-0.26132				-0.47714	3.723616	0.925892	-0.88217	3.477412	-0.22038	-0.69608	-0.22198	-0.34637	-0.41457	-0.606
1.65556	-0.80303	0.383118	-0.50302	-0.53701	0.0497	-1.00255	-1.14968	-1.68371	-0.19536	0.757418	-0.19985				-0.4812	3.605597	0.909038	-0.89927	3.558621	-0.27787	-0.62821	-0.18372	-0.36338	-0.41441	-0.58528
1.66368	-0.7597	0.39838	-0.2204	-0.45612	-0.02681	-0.99427	-1.11649	-1.77077	-0.13227	0.982196	-0.15234				-0.45505	3.495039	0.935193	-0.88483	3.635892	-0.33035	-0.49569	-0.12778	-0.37936	-0.36875	-0.55561
1.67189	-0.69127	0.346867	0.016753	-0.38197	-0.12464	-0.97547	-1.06821	-1.79579	-0.09556	1.159715	-0.10845				-0.39448	3.403838	0.996707	-0.83648	3.695343	-0.36661	-0.30271	-0.08866	-0.39519	-0.32178	-0.52319
1.68009	-0.62407	0.265409	0.194527	-0.3355	-0.20705	-0.95045	-1.00272	-1.75386	-0.06163	1.285754	-0.06933				-0.32171	3.3107	1.043445	-0.77355	3.735574	-0.39692	-0.07223	-0.08979	-0.40568	-0.29688	-0.50435
1.68829	-0.5896	0.206408	0.31044	-0.32488	-0.25213	-0.92822	-0.9142	-1.67262	-0.02335	1.362179	-0.04658				-0.26308	3.197215	1.062624	-0.72234	3.749378	-0.43021	0.165001	-0.1253	-0.38986	-0.3015	-0.50064
1.6965	-0.58263	0.165337	0.388209	-0.34055	-0.27379	-0.91667	-0.81702	-1.58439	-0.01037	1.377141	-0.04595				-0.25281	3.074212	1.048769	-0.70014	3.714073	-0.46471	0.372406	-0.17112	-0.34393	-0.3162	-0.49586
1.7047	-0.58378	0.100756	0.487982	-0.34455	-0.28948	-0.91247	-0.72974	-1.50654	-0.05271	1.321359	-0.07351				-0.29517	2.980579	0.999101	-0.7073	3.618108	-0.48739	0.52348	-0.21794	-0.28666	-0.30539	-0.46735
1.7129	-0.5827	-0.00154	0.628584	-0.32251	-0.30267	-0.91207	-0.66771	-1.44731	-0.13978	1.208441	-0.12688				-0.35981	2.923473	0.908997	-0.71526	3.480042	-0.49697	0.607549	-0.26937	-0.24557	-0.2387	-0.41446
1.7211	-0.59099	-0.09556	0.77977	-0.28134	-0.30333	-0.91873	-0.63433	-1.42291	-0.23489	1.073576	-0.19542				-0.42406	2.874885	0.797814	-0.70943	3.338231	-0.5025	0.645672	-0.34082	-0.24425	-0.11909	-0.34987
1.72931	-0.60848	-0.13597	0.872677	-0.24018	-0.28772	-0.93623	-0.62508	-1.43081	-0.30994	0.947314	-0.26375				-0.47439	2.803472	0.739671	-0.69446	3.209541	-0.51535	0.670408	-0.44093	-0.28693	0.005318	-0.28115
1.73751	-0.61416	-0.12926	0.892659	-0.21248	-0.26662	-0.96321	-0.63741	-1.45006	-0.36909	0.836441	-0.31074				-0.50734	2.710912	0.769004	-0.68425	3.102388	-0.53448	0.70061	-0.55253	-0.36281	0.082773	-0.20959
1.74571	-0.60098	-0.1039	0.913305	-0.17958	-0.2557	-0.99063	-0.66362	-1.44706	-0.42284	0.741556	-0.33085				-0.51734	2.65377	0.850716	-0.68914	3.030341	-0.54877	0.735419	-0.62546	-0.45183	0.092689	-0.13201
1.75384	-0.58754	-0.0766	0.971786	-0.11573	-0.26787	-1.01036	-0.6996	-1.42704	-0.4726	0.6717	-0.33018				-0.51284	2.677349	0.900769	-0.70613	2.997659	-0.55649	0.75625	-0.62637	-0.54253	0.055772	-0.05569
1.76204	-0.61165	-0.04572	1.029372	-0.00984	-0.28493	-1.02028	-0.73377	-1.42702	-0.50995	0.641034	-0.32187				-0.51836	2.774001	0.861131	-0.73329	2.986087	-0.56601	0.753397	-0.5897	-0.62531	0.009521	0.015328
1.77024	-0.68477	-0.02569	1.027104	0.123098	-0.27458	-1.03048	-0.7567	-1.4604	-0.54313	0.652549	-0.31108				-0.55119	2.878603	0.749797	-0.76373	2.946531	-0.58484	0.733836	-0.5775	-0.6876	-0.02461	0.079344
1.77845	-0.78082	-0.03959	0.966879	0.251056	-0.23155	-1.05053	-0.77006	-1.51913	-0.58873	0.678573	-0.29646				-0.6112	2.917893	0.620261	-0.80144	2.849301	-0.61075	0.731965	-0.62972	-0.71133	-0.04343	0.130233
1.78665	-0.84935	-0.07734	0.883386	0.356091	-0.18984	-1.07731	-0.77965	-1.58687	-0.64181	0.687379	-0.27979				-0.67482	2.882558	0.521613	-0.84498	2.704952	-0.63579	0.77491	-0.70832	-0.68274	-0.05784	0.155748
1.79485	-0.84441	-0.11031	0.800509	0.434185	-0.18724	-1.09549	-0.79774	-1.67547	-0.68246	0.650701	-0.26605				-0.72894	2.818193	0.462699	-0.86846	2.558677	-0.65328	0.864128	-0.75042	-0.61811	-0.07229	0.145475
1.80306	-0.7617	-0.11443	0.715981	0.490011	-0.222	-1.08889	-0.82129	-1.80935	-0.70025	0.559321	-0.2579				-0.74857	2.771221	0.435732	-0.85878	2.459691	-0.66359	0.982996	-0.7225	-0.54934	-0.07297	0.110352
1.81126	-0.65369	-0.10624	0.636515	0.510045	-0.24969	-1.06477	-0.83333	-1.97942	-0.72002	0.429554	-0.25069				-0.71164	2.731572	0.431261	-0.82253	2.425203	-0.67818	1.097012	-0.64347	-0.50517	-0.03171	0.075819
1.81946	-0.59225	-0.10963	0.605083	0.481323	-0.22035	-1.04144	-0.81429	-2.14434	-0.76444	0.280096	-0.24437				-0.61765	2.667647	0.437149	-0.78033	2.45264	-0.69903	1.186835	-0.57998	-0.49398	0.066014	0.058058
1.82766	-0.58113	-0.11244	0.626825	0.41235	-0.1319	-1.03611	-0.76679	-2.23696	-0.81834	0.14366	-0.23735				-0.50677	2.571068	0.457993	-0.73972	2.508175	-0.7171	1.235974	-0.57604	-0.49933	0.199447	0.049802
1.83587	-0.56964	-0.08961	0.643073	0.337742	-0.02504	-1.04334	-0.7215	-2.21699	-0.84409	0.060816	-0.22842				-0.44561	2.463135	0.487313	-0.70022	2.549373	-0.72217	1.238428	-0.63349	-0.50841	0.331853	0.035511
1.84399	-0.52105	-0.03945	0.584098	0.285442	0.055977	-1.04274	-0.70963	-2.08271	-0.81527	0.075646	-0.22174				-0.44465	2.359691	0.517884	-0.67708	2.555308	-0.71615	1.196032	-0.71581	-0.50429	0.450251	0.01086
1.85219	-0.46383	0.003742	0.452029	0.254196	0.088398	-1.0245	-0.74018	-1.86811	-0.74699	0.211471	-0.22469				-0.46883	2.260495	0.548098	-0.69866	2.537317	-0.72149	1.116127	-0.77683	-0.48205	0.58069	-0.01879
1.8604	-0.46499	0.019116	0.327074	0.235607	0.080915	-0.98992	-0.79546	-1.63383	-0.66692	0.451368	-0.24753				-0.48897	2.173562	0.579178	-0.77987	2.525902	-0.75128	1.015724	-0.80244	-0.45497	0.731051	-0.04929
1.8686	-0.53505	0.037341	0.299438	0.215534	0.064349	-0.9538	-0.85974	-1.42658	-0.58362	0.746935	-0.28612				-0.53335	2.118081	0.597945	-0.89139	2.535277	-0.79464	0.91612	-0.80864	-0.44997	0.856849	-0.08631
1.8768	-0.63266	0.100842	0.430936	0.207347	0.068422	-0.92956	-0.92101	-1.24789	-0.4904	1.030027	-0.32807				-0.64691	2.105948	0.598647	-0.98582	2.549216	-0.8282	0.848497	-0.82701	-0.49299	0.899668	-0.13443
1.885	-0.71585	0.203341	0.671974	0.231822	0.099576	-0.92301	-0.9725	-1.07591	-0.38893	1.260191	-0.36275				-0.80923	2.11932	0.604453	-1.03619	2.535149	-0.83407	0.830596	-0.84559	-0.58053	0.840463	-0.18449
1.89321	-0.76696	0.285353	0.894125	0.273152	0.13526	-0.92878	-1.00429	-0.89268	-0.30698	1.429371	-0.38658				-0.95563	2.126534	0.649429	-1.03679	2.480873	-0.81842	0.856187	-0.82853	-0.68914	0.740784	-0.22388
1.90141	-0.78537	0.302541	0.988744	0.306526	0.151936	-0.92163	-1.00938	-0.71309	-0.26115	1.543493	-0.40406				-1.02866	2.115998	0.76844	-0.99338	2.399913	-0.80062	0.884694	-0.77318	-0.7786	0.690356	-0.24208
1.90961	-0.7711	0.274461	0.906932	0.312199	0.139881	-0.87789	-0.99444	-0.60146	-0.24516	1.591357	-0.41214				-1.02561	2.085555	0.932813	-0.928	2.316799	-0.79325	0.873914	-0.72169	-0.79947	0.735973	-0.24556
1.91782	-0.7587	0.256314	0.694487	0.305832	0.11789	-0.79638	-0.97172	-0.61483	-0.23737	1.560474	-0.41348				-0.9846	2.027467	1.070288	-0.88553	2.261535	-0.79661	0.815625	-0.72374	-0.72039	0.856764	-0.24686
1.92602	-0.78162	0.26876	0.433266	0.31399	0.113007	-0.70416	-0.95615	-0.71985	-0.2284	1.457591	-0.41881				-0.93439	1.928043	1.132875	-0.88592	2.251633	-0.81054	0.734876	-0.77194	-0.55973	0.992896	-0.25467
1.93414	-0.83576	0.275057	0.204958	0.33729	0.139473	-0.63175	-0.9538	-0.8247	-0.22919	1.315348	-0.43528				-0.88498	1.796844	1.101781	-0.90944	2.298063	-0.84098	0.660033	-0.80379	-0.38826	1.117452	-0.26881
1.94234	-0.87909	0.246364	0.049805	0.346758	0.198268	-0.59172	-0.9594	-0.85329	-0.24949	1.18681	-0.45583				-0.82596	1.688351	1.002665	-0.91202	2.391625	-0.88295	0.603999	-0.76797	-0.27624	1.24525	-0.27748
1.95055	-0.87584	0.192778	-0.04275	0.315657	0.269764	-0.58134	-0.9737	-0.81284	-0.28136	1.1127	-0.46119				-0.76172	1.641984	0.863773	-0.86906	2.513747	-0.92087	0.568335	-0.67655	-0.24798	1.395402	-0.26789
1.95875	-0.85824	0.154705	-0.09891	0.271206	0.322063	-0.59745	-1.00423	-0.75978	-0.30815	1.110194	-0.44292				-0.72685	1.659992	0.731237	-0.80605	2.635457	-0.94024	0.54614	-0.56568	-0.27331	1.543495	-0.22437
1.96695	-0.87529	0.152182	-0.15696	0.255535	0.330873	-0.64163	-1.05643	-0.73062	-0.33025	1.175782	-0.40087				-0.7566	1.693353	0.652305	-0.75622	2.722068	-0.94335	0.530406	-0.43403	-0.31402	1.643755	-0.14154
1.97516	-0.93418	0.174354	-0.22365	0.274047	0.302099	-0.70226	-1.11816	-0.73733	-0.35141	1.265117	-0.3372				-0.84323	1.687929	0.620179	-0.73188	2.769848	-0.94723	0.519975	-0.24302	-0.34854	1.688647	-0.03565
1.98336	-0.98926	0.191309	-0.25644	0.292637	0.267274	-0.75336	-1.16779	-0.77424	-0.37013	1.320123	-0.25613				-0.92648	1.62998	0.601164	-0.71879	2.789978	-0.96724	0.511378	0.048651	-0.36604	1.70938	0.069912
1.99156	-1.0119	0.168291	-0.2108	0.274163	0.256455	-0.77142	-1.19651	-0.86458	-0.3871	1.307989	-0.17108				-0.94106	1.537833	0.552803	-0.69842	2.795813	-1.00071	0.502971	0.393597	-0.35919	1.744532	0.151739
1.99977	-1.00864	0.106552	-0.08544	0.225359	0.271688	-0.75918	-1.21046	-1.00089	-0.39764	1.249267	-0.09678				-0.8722	1.445613	0.458957	-0.67354	2.78744	-1.02417	0.49194	0.680002	-0.32832	1.811353	0.193625
2.00797	-0.98795	0.033635	0.064834	0.173781	0.284126	-0.74187	-1.2226	-1.11717	-0.40618	1.193354	-0.04376				-0.77282	1.374383	0.344871	-0.66124	2.756563	-1.01856	0.469187	0.825223	-0.3064	1.902979	0.185379
2.01617	-0.94528	-0.01769	0.173202	0.127327	0.275797	-0.73342	-1.23099	-1.16323	-0.42335	1.162602	-0.01646				-0.70539	1.341049	0.272859	-0.69176	2.717235	-0.97074	0.42778	0.849083	-0.32907	2.013691	0.135999
2.02429	-0.8783	-0.03247	0.196888	0.071982	0.268656	-0.7256	-1.21716	-1.1493	-0.45932	1.14793	-0.01398				-0.68896	1.34684	0.297803	-0.76082	2.699856	-0.89178	0.371243	0.845337	-0.39861	2.134953	0.074462
2.0325	-0.82347	-0.02872	0.170995	0.021637	0.314793	-0.69379	-1.17348	-1.1335	-0.51773	1.114726	-0.04015				-0.70517	1.359552	0.408064	-0.82073	2.719317	-0.80863	0.314374	0.883733	-0.48409	2.237553	0.033495
2.0407	-0.8237	-0.02736	0.158219	0.010156	0.455191	-0.63067	-1.1096	-1.15412	-0.58597	1.044081	-0.08873				-0.73256	1.342407	0.560095	-0.81819	2.740954	-0.74272	0.273094	0.982306	-0.5426	2.276849	0.026386
2.0489	-0.88409	-0.03888	0.182028	0.051736	0.676387	-0.55635	-1.04715	-1.20651	-0.64601	0.943	-0.13275				-0.7871	1.286091	0.679519	-0.74205	2.714178	-0.70784	0.24237	1.108817	-0.56451	2.242939	0.038294
2.05711	-0.96158	-0.06312	0.228196	0.134194	0.92277	-0.50109	-1.00166	-1.27189	-0.67691	0.830496	-0.15164				-0.87229	1.221231	0.728829	-0.64123	2.631413	-0.69088	0.207228	1.222842	-0.56123	2.15547	0.040076
2.06531	-1.00853	-0.11583	0.268238	0.212972	1.127674	-0.48024	-0.98288	-1.34339	-0.68239	0.731375	-0.14889				-0.96485	1.177415	0.719804	-0.58139	2.524786	-0.6794	0.157567	1.301249	-0.55394	2.049268	0.012691
2.07351	-1.02739	-0.22396	0.298281	0.265196	1.261776	-0.48549	-0.98179	-1.43451	-0.68702	0.654167	-0.15435				-1.01885	1.156223	0.680001	-0.59156	2.438353	-0.6655	0.106835	1.305151	-0.55942	1.949583	-0.03492
2.08172	-1.04994	-0.37665	0.303774	0.296826	1.331713	-0.50424	-0.97156	-1.53465	-0.70668	0.58345	-0.18261				-1.00295	1.125376	0.625641	-0.63427	2.388505	-0.64835	0.081003	1.214029	-0.57886	1.863395	-0.08174
2.08992	-1.10923	-0.52058	0.279224	0.322303	1.35726	-0.53425	-0.92767	-1.61149	-0.74073	0.49641	-0.22258				-0.95369	1.049621	0.561072	-0.64405	2.357343	-0.63007	0.084451	1.054198	-0.61439	1.797535	-0.11565
2.09812	-1.20606	-0.57675	0.240293	0.345756	1.358337	-0.57368	-0.84332	-1.6385	-0.76847	0.388168	-0.26123				-0.92091	0.929868	0.503851	-0.57936	2.31638	-0.60843	0.102071	0.893067	-0.6488	1.761402	-0.13525
2.10632	-1.29355	-0.52517	0.212287	0.356052	1.33883	-0.61747	-0.73904	-1.61558	-0.77749	0.28716	-0.29853				-0.92041	0.787114	0.452215	-0.44899	2.249508	-0.59169	0.108705	0.783891	-0.66033	1.760703	-0.15051
2.11445	-1.31785	-0.4074	0.208784	0.35115	1.302641	-0.6549	-0.64566	-1.55735	-0.77343	0.226281	-0.3453				-0.91683	0.652896	0.409027	-0.30668	2.159755	-0.58456	0.093812	0.731156	-0.64245	1.781613	-0.15894
2.12265	-1.24959	-0.29057	0.192336	0.321176	1.262622	-0.68117	-0.5872	-1.48154	-0.77155	0.215232	-0.39248				-0.86411	0.541622	0.371439	-0.20685	2.058388	-0.5895	0.064942	0.697369	-0.61376	1.793947	-0.152
2.13085	-1.114	-0.21269	0.151183	0.276966	1.232954	-0.70127	-0.56483	-1.41597	-0.77981	0.227274	-0.41498				-0.761	0.467125	0.348792	-0.18291	1.973647	-0.61329	0.043838	0.633343	-0.61206	1.777488	-0.12925
2.13906	-0.97394	-0.16939	0.104105	0.259937	1.216759	-0.72318	-0.56625	-1.37626	-0.79223	0.227892	-0.40506				-0.64048	0.4559	0.391485	-0.22169	1.918887	-0.66882	0.047163	0.535447	-0.6536	1.714132	-0.10884
2.14726	-0.89166	-0.14251	0.063384	0.305457	1.197221	-0.75186	-0.57926	-1.36582	-0.79426	0.195378	-0.38373				-0.55151	0.515291	0.512739	-0.27376	1.883262	-0.75845	0.068579	0.438217	-0.71543	1.604629	-0.11818
2.15546	-0.88099	-0.11692	0.014593	0.408362	1.162164	-0.78315	-0.58435	-1.36225	-0.76989	0.131106	-0.38093				-0.51609	0.617441	0.660931	-0.28835	1.843208	-0.85468	0.090482	0.364618	-0.75305	1.466144	-0.15994
2.16367	-0.88812	-0.08861	-0.08359	0.51411	1.112666	-0.81482	-0.56441	-1.354	-0.72698	0.053214	-0.39828				-0.53526	0.68936	0.741446	-0.23483	1.780075	-0.9207	0.091148	0.297377	-0.74193	1.327914	-0.21406
2.17187	-0.85923	-0.04308	-0.21734	0.583054	1.060124	-0.84731	-0.50132	-1.35871	-0.69012	-0.02132	-0.41679				-0.59339	0.683541	0.700432	-0.1361	1.705456	-0.94216	0.074184	0.204486	-0.68626	1.217529	-0.25509
2.18007	-0.77644	0.016283	-0.31461	0.635441	1.011831	-0.88468	-0.37798	-1.39368	-0.68356	-0.07683	-0.42501				-0.66907	0.614743	0.590309	-0.03603	1.642578	-0.94278	0.051359	0.0871	-0.60351	1.130903	-0.27081
2.18827	-0.65943	0.071614	-0.30531	0.725267	0.96702	-0.92415	-0.18222	-1.46743	-0.71594	-0.1245	-0.42191				-0.74751	0.544532	0.508061	0.033639	1.618895	-0.95116	0.035636	-0.02418	-0.51622	1.057435	-0.26964
2.19648	-0.53645	0.132921	-0.20217	0.875494	0.932901	-0.95663	0.081524	-1.54556	-0.7764	-0.17854	-0.40372				-0.81864	0.53227	0.537848	0.064063	1.637127	-0.97801	0.023683	-0.08327	-0.42761	0.982582	-0.26257
2.20468	-0.42052	0.220054	-0.09865	1.051563	0.921869	-0.97374	0.373265	-1.59787	-0.85001	-0.24055	-0.35387				-0.8912	0.58921	0.682009	0.068788	1.675709	-1.01109	0.006822	-0.08397	-0.32566	0.902224	-0.25419
2.2128	-0.30084	0.329463	-0.06898	1.210198	0.925078	-0.97261	0.642486	-1.61999	-0.90885	-0.28769	-0.26168				-0.97014	0.691526	0.868808	0.068805	1.716985	-1.03305	-0.00557	-0.06498	-0.17612	0.817919	-0.23563
2.221	-0.15342	0.429354	-0.11141	1.330316	0.901248	-0.96545	0.840819	-1.60846	-0.93152	-0.28909	-0.13865				-1.04513	0.798026	1.007384	0.092812	1.750328	-1.04459	-0.00421	-0.04957	0.049316	0.734287	-0.1916
2.22921	0.030547	0.48997	-0.16857	1.402381	0.818044	-0.9604	0.948047	-1.56643	-0.9048	-0.25494	-0.02178				-1.09193	0.861593	1.05104	0.143458	1.772925	-1.05197	0.017463	-0.03315	0.338297	0.657753	-0.11268
2.23741	0.240332	0.516012	-0.21137	1.398364	0.699029	-0.95769	0.975296	-1.51066	-0.8238	-0.22914	0.056157				-1.09396	0.854471	1.051686	0.187836	1.767864	-1.06048	0.042296	0.003345	0.629083	0.597155	-0.00552
2.24561	0.433072	0.540058	-0.25275	1.321175	0.602364	-0.94847	0.947986	-1.49002	-0.70345	-0.25576	0.081532				-1.07246	0.784893	1.102538	0.199316	1.720589	-1.07134	0.051708	0.044114	0.830645	0.561166	0.100099
2.25382	0.57913	0.598714	-0.30816	1.224193	0.559716	-0.9248	0.892492	-1.53778	-0.55914	-0.33392	0.061974				-1.05261	0.695949	1.23799	0.184628	1.641726	-1.07763	0.043597	0.056788	0.907039	0.540243	0.173378
2.26202	0.663919	0.684975	-0.36424	1.15993	0.536537	-0.89489	0.821978	-1.61465	-0.41153	-0.42907	0.022281				-1.041	0.620195	1.384408	0.174031	1.554809	-1.07643	0.028048	0.029994	0.890088	0.528811	0.199757
2.27022	0.67638	0.766865	-0.37999	1.142554	0.484378	-0.86321	0.741952	-1.64253	-0.27317	-0.51591	-0.01951				-1.01966	0.569358	1.460038	0.171202	1.48611	-1.07229	0.02003	-0.02379	0.830218	0.536269	0.193927
2.27843	0.622452	0.82268	-0.35145	1.136274	0.391092	-0.82942	0.650253	-1.57677	-0.16384	-0.59335	-0.0528				-0.97828	0.538254	1.479066	0.150774	1.446277	-1.07563	0.020829	-0.08454	0.755923	0.573533	0.184368
2.28663	0.524393	0.835187	-0.28886	1.111463	0.297648	-0.78326	0.550745	-1.45092	-0.09163	-0.67557	-0.07022				-0.93381	0.51787	1.517535	0.097728	1.430931	-1.09085	0.021813	-0.16873	0.669798	0.642988	0.188523
2.29483	0.430418	0.813688	-0.19403	1.073514	0.251261	-0.71831	0.453331	-1.31864	-0.03711	-0.76572	-0.06836				-0.88598	0.519219	1.60431	0.034678	1.417426	-1.11119	0.005141	-0.28935	0.579287	0.719933	0.200045
2.30295	0.381675	0.792639	-0.06665	1.036961	0.248387	-0.64482	0.370809	-1.18819	0.018934	-0.85621	-0.04165				-0.82038	0.556656	1.675345	-0.00915	1.385319	-1.13114	-0.02746	-0.39628	0.502453	0.777387	0.198253
2.31116	0.375661	0.799756	0.059264	1.01239	0.254098	-0.57927	0.30907	-1.0294	0.07544	-0.93945	0.009722				-0.72171	0.63063	1.671479	-0.0326	1.32166	-1.13789	-0.04751	-0.41817	0.455567	0.79331	0.181238
2.31936	0.397392	0.816115	0.108549	0.976753	0.24068	-0.53148	0.261456	-0.83593	0.109437	-1.00474	0.085537				-0.61289	0.690672	1.585832	-0.04407	1.236428	-1.12237	-0.02515	-0.34352	0.423841	0.76406	0.16291
2.32756	0.435961	0.807677	0.056564	0.916005	0.210305	-0.4943	0.215155	-0.63851	0.096022	-1.0439	0.177414				-0.54636	0.686652	1.442895	-0.05456	1.164673	-1.08821	0.046728	-0.2433	0.382776	0.70903	0.159068
2.33577	0.494774	0.752337	-0.06038	0.846868	0.182682	-0.46261	0.15807	-0.41608	0.025396	-1.05811	0.272834				-0.53562	0.601885	1.279554	-0.05859	1.132787	-1.0522	0.150446	-0.19124	0.342977	0.649543	0.167324
2.34397	0.550792	0.661136	-0.17912	0.806164	0.171966	-0.44155	0.088321	-0.11601	-0.08351	-1.06787	0.361955				-0.55353	0.453551	1.130467	-0.0589	1.137563	-1.03846	0.258928	-0.20448	0.330609	0.605894	0.161587
2.35217	0.555724	0.568691	-0.27507	0.819639	0.176088	-0.44144	0.019623	0.30675	-0.18852	-1.08822	0.436926				-0.56169	0.292193	1.049237	-0.07191	1.143079	-1.0536	0.342388	-0.24492	0.354576	0.582363	0.132391
2.36038	0.492995	0.481946	-0.38833	0.862192	0.172843	-0.46715	-0.0353	0.833493	-0.26824	-1.11336	0.498856				-0.5359	0.16864	1.050916	-0.09657	1.111918	-1.08021	0.394611	-0.2776	0.407464	0.57201	0.094909
2.36858	0.386569	0.381512	-0.52546	0.882313	0.15512	-0.51017	-0.07311	1.401432	-0.32279	-1.11982	0.553286				-0.47576	0.122649	1.100116	-0.11603	1.025939	-1.09317	0.435163	-0.29199	0.480304	0.560911	0.072983
2.37678	0.277621	0.24626	-0.62537	0.841407	0.140916	-0.55481	-0.10877	1.954507	-0.35929	-1.09982	0.607245				-0.40341	0.158746	1.139919	-0.10664	0.893937	-1.09254	0.496367	-0.28552	0.560021	0.530112	0.068174
2.38499	0.184897	0.084544	-0.59748	0.756888	0.145166	-0.5855	-0.16226	2.452735	-0.36873	-1.07836	0.688265				-0.3567	0.255344	1.119901	-0.08072	0.759809	-1.09327	0.592435	-0.26245	0.625725	0.477024	0.055753
2.39311	0.116936	-0.05396	-0.4448	0.684737	0.156356	-0.60483	-0.23727	2.870954	-0.32059	-1.07887	0.838235				-0.36511	0.367214	1.032025	-0.06822	0.676632	-1.09526	0.698812	-0.22756	0.653386	0.412759	0.023315
2.40131	0.075092	-0.12157	-0.28054	0.647346	0.135357	-0.62517	-0.31869	3.151856	-0.18952	-1.10321	1.079414				-0.42388	0.436489	0.8873	-0.08692	0.660504	-1.08358	0.768951	-0.19809	0.619527	0.361508	-0.01743
2.40951	0.043893	-0.09436	-0.22438	0.62056	0.054254	-0.66141	-0.38328	3.250648	0.016024	-1.12416	1.380364				-0.4656	0.447686	0.732833	-0.12705	0.684785	-1.04102	0.781729	-0.17183	0.530408	0.343343	-0.03917
2.41772	-0.00272	-0.00792	-0.31144	0.572218	-0.07487	-0.71648	-0.42472	3.178945	0.242832	-1.12266	1.665961				-0.40998	0.421171	0.63197	-0.14476	0.705604	-0.97989	0.749324	-0.14256	0.408514	0.362776	-0.03362
2.42592	-0.08352	0.069791	-0.45005	0.499373	-0.19651	-0.77399	-0.45511	2.989843	0.450975	-1.12097	1.85867				-0.24012	0.38713	0.613588	-0.10759	0.71257	-0.92659	0.696122	-0.1267	0.279337	0.405778	-0.01122
2.43412	-0.18423	0.078696	-0.51438	0.426692	-0.25553	-0.81589	-0.48432	2.771504	0.641446	-1.14442	1.937187				-0.01424	0.359128	0.657657	-0.02859	0.720964	-0.90638	0.632925	-0.13209	0.161766	0.452108	0.015669
2.44233	-0.26638	-0.00226	-0.42317	0.401977	-0.23218	-0.8348	-0.50695	2.592445	0.820975	-1.19263	1.935304				0.17221	0.327317	0.720423	0.042768	0.745082	-0.92398	0.554512	-0.14568	0.066589	0.488829	0.038196
2.45053	-0.30692	-0.12427	-0.17485	0.458303	-0.1484	-0.83544	-0.50736	2.474034	0.985717	-1.2373	1.89862				0.287381	0.287191	0.776145	0.065555	0.775092	-0.96555	0.465995	-0.11231	0.000821	0.484312	0.052375
2.45873	-0.32744	-0.22326	0.190052	0.584951	-0.05659	-0.8246	-0.4812	2.38652	1.108376	-1.25089	1.851379				0.342717	0.247285	0.818741	0.051535	0.787978	-1.02114	0.382976	0.016071	-0.04505	0.389294	0.050197
2.46694	-0.36408	-0.24946	0.591088	0.737586	-0.01045	-0.80774	-0.43799	2.275747	1.184276	-1.23067	1.790636				0.3718	0.219541	0.849409	0.040591	0.782256	-1.06871	0.323053	0.226494	-0.08427	0.244194	0.029359
2.47514	-0.40231	-0.2001	0.908167	0.848949	-0.04131	-0.79965	-0.39146	2.100319	1.247063	-1.18751	1.711394				0.387328	0.188657	0.849202	0.062949	0.778802	-1.09409	0.28888	0.463752	-0.12619	0.155503	-0.00395
2.48326	-0.4046	-0.10254	1.079351	0.887697	-0.12669	-0.80997	-0.34989	1.844758	1.339876	-1.14148	1.614997				0.387463	0.134544	0.825483	0.10388	0.810425	-1.09181	0.273448	0.652344	-0.18066	0.114716	-0.03542
2.49146	-0.34498	0.018494	1.12646	0.863088	-0.21192	-0.83537	-0.31402	1.535887	1.474029	-1.10331	1.513693				0.380788	0.063782	0.817104	0.131252	0.880034	-1.06687	0.265809	0.775869	-0.23943	0.014737	-0.05948
2.49967	-0.24265	0.138112	1.154405	0.798392	-0.25446	-0.86398	-0.28524	1.220514	1.609503	-1.0807	1.418144				0.362914	0.015744	0.842832	0.132415	0.956231	-1.03387	0.25172	0.873307	-0.28777	-0.15249	-0.0835
2.50787	-0.14493	0.228312	1.241664	0.710193	-0.25301	-0.88485	-0.2604	0.9446	1.702759	-1.07299	1.322605				0.331541	0.023711	0.890946	0.122684	1.00099	-1.0007	0.228741	0.991015	-0.31589	-0.3122	-0.11511
2.51607	-0.08666	0.268415	1.338335	0.606459	-0.24838	-0.89875	-0.2341	0.712733	1.744092	-1.07383	1.223095				0.293955	0.059248	0.918353	0.126114	0.993968	-0.97567	0.201777	1.136143	-0.3312	-0.4345	-0.15765
2.52427	-0.08208	0.284834	1.350757	0.504035	-0.2767	-0.90948	-0.20823	0.518331	1.764225	-1.08437	1.119636				0.285633	0.079788	0.887657	0.142361	0.935611	-0.96187	0.18156	1.270906	-0.35067	-0.51778	-0.19797
2.53248	-0.12257	0.323659	1.235445	0.417705	-0.34255	-0.91825	-0.19753	0.362109	1.810813	-1.1084	1.027587				0.346043	0.067269	0.807101	0.166864	0.838992	-0.96163	0.166835	1.365212	-0.38011	-0.55212	-0.22443
2.54068	-0.19316	0.401326	1.043599	0.361138	-0.41907	-0.92015	-0.21867	0.269462	1.915715	-1.14663	0.961685				0.452746	0.038524	0.721207	0.1905	0.738038	-0.97008	0.145107	1.429768	-0.41058	-0.51763	-0.24248
2.54889	-0.27556	0.499636	0.850334	0.348414	-0.47407	-0.91218	-0.26645	0.291207	2.071831	-1.17661	0.908266				0.558884	0.023454	0.696579	0.211225	0.667953	-0.9817	0.102547	1.486583	-0.41693	-0.41346	-0.2667
2.55709	-0.34503	0.596529	0.704069	0.379111	-0.5017	-0.89875	-0.31761	0.439869	2.223395	-1.1813	0.845253				0.628947	0.023426	0.756415	0.233946	0.653957	-0.99466	0.045222	1.513055	-0.39755	-0.25772	-0.30816
2.56529	-0.38457	0.702094	0.636345	0.448026	-0.51431	-0.88492	-0.34735	0.65704	2.313408	-1.16396	0.757924				0.657219	0.015735	0.890189	0.25976	0.700891	-1.00248	0.003225	1.464024	-0.37202	-0.08837	-0.35149
2.57341	-0.38458	0.814535	0.638968	0.525389	-0.53565	-0.87412	-0.36456	0.836544	2.32586	-1.14859	0.661498				0.655967	-0.02739	1.051494	0.287281	0.788718	-0.99755	-0.008	1.335722	-0.36353	0.059831	-0.37728
2.58162	-0.35977	0.89861	0.700613	0.57532	-0.57576	-0.86139	-0.39319	0.911576	2.297142	-1.15637	0.581622				0.644013	-0.09558	1.188528	0.300476	0.886751	-0.97455	0.006683	1.193009	-0.37433	0.180027	-0.39029
2.58982	-0.3455	0.905943	0.804274	0.583295	-0.6205	-0.84156	-0.44925	0.920762	2.26437	-1.17467	0.528002				0.640935	-0.14824	1.291552	0.297169	0.959451	-0.94567	0.019553	1.120877	-0.38825	0.27647	-0.41273
2.59802	-0.37729	0.822084	0.94952	0.570745	-0.63911	-0.81284	-0.52557	0.923467	2.227753	-1.18017	0.488672				0.649821	-0.15699	1.359904	0.289021	0.989333	-0.91863	0.014307	1.128359	-0.38353	0.349638	-0.45378
2.60622	-0.44761	0.704349	1.131907	0.561816	-0.61508	-0.78859	-0.59425	0.928478	2.164784	-1.1551	0.44649				0.662316	-0.12259	1.401331	0.290316	0.979489	-0.88159	-0.00506	1.15558	-0.33705	0.393032	-0.48861
2.61443	-0.50499	0.623624	1.315313	0.559379	-0.56416	-0.78658	-0.63472	0.888039	2.053087	-1.10735	0.393571				0.662756	-0.08833	1.409214	0.313911	0.945001	-0.80895	-0.02716	1.137173	-0.25386	0.413282	-0.49457
2.62263	-0.51096	0.608155	1.433695	0.564099	-0.51271	-0.80677	-0.64795	0.758627	1.906022	-1.05834	0.330687				0.660106	-0.08587	1.382853	0.35358	0.899474	-0.6757	-0.03897	1.058985	-0.15487	0.41891	-0.48246
2.63083	-0.47823	0.616006	1.450792	0.574722	-0.48023	-0.83871	-0.6536	0.560363	1.756756	-1.01401	0.273606				0.674878	-0.10714	1.349695	0.399187	0.82951	-0.48308	-0.05191	0.957062	-0.07277	0.409903	-0.48303
2.63904	-0.45949	0.58093	1.423326	0.576418	-0.46886	-0.86248	-0.66873	0.345441	1.623767	-0.97864	0.231377				0.720685	-0.12477	1.340037	0.437223	0.739068	-0.2476	-0.07304	0.861632	-0.03917	0.389522	-0.50465
2.64724	-0.48275	0.471547	1.42115	0.533084	-0.474	-0.86744	-0.69382	0.155805	1.516241	-0.95651	0.205478				0.796184	-0.13297	1.363509	0.44641	0.668187	0.008294	-0.1036	0.8036	-0.06199	0.382248	-0.5239
2.65544	-0.54423	0.310487	1.457967	0.426672	-0.48985	-0.85625	-0.72027	0.0000282	1.425221	-0.95949	0.180484				0.867894	-0.15009	1.396928	0.405628	0.665472	0.257846	-0.13317	0.788387	-0.11951	0.424551	-0.5225
2.66357	-0.62582	0.157935	1.487315	0.285124	-0.50317	-0.83463	-0.74205	-0.10865	1.336154	-0.99801	0.137211				0.910758	-0.18715	1.421404	0.324468	0.733218	0.474639	-0.14689	0.809718	-0.1675	0.532805	-0.50995
2.67177	-0.70434	0.061266	1.4615	0.161086	-0.50284	-0.81844	-0.76207	-0.15498	1.226718	-1.06732	0.08063				0.912179	-0.23293	1.412682	0.248099	0.809985	0.632357	-0.1443	0.862568	-0.18625	0.686912	-0.51395
2.67997	-0.76716	0.032798	1.392557	0.10395	-0.48268	-0.8219	-0.77675	-0.17666	1.084769	-1.15261	0.024836				0.887629	-0.26974	1.344027	0.20631	0.823916	0.724595	-0.1288	0.93136	-0.18483	0.831044	-0.54233
2.68817	-0.78687	0.059392	1.320714	0.110885	-0.4523	-0.85223	-0.78224	-0.24284	0.918735	-1.21842	-0.02605				0.870758	-0.3073	1.225993	0.192018	0.75015	0.754741	-0.11188	1.001213	-0.17689	0.91816	-0.58512
2.69638	-0.74948	0.113444	1.285162	0.150963	-0.42333	-0.89348	-0.78393	-0.37925	0.751858	-1.23655	-0.0833				0.875878	-0.36491	1.125019	0.174262	0.630721	0.741489	-0.09079	1.041753	-0.17305	0.948815	-0.62757
2.70458	-0.66976	0.155396	1.271197	0.198062	-0.39139	-0.92452	-0.78967	-0.53185	0.624581	-1.2058	-0.15039				0.911231	-0.43711	1.126285	0.140242	0.530833	0.716685	-0.04875	1.040671	-0.16376	0.948704	-0.65572
2.71278	-0.58523	0.144469	1.254039	0.234711	-0.35317	-0.94506	-0.80184	-0.63038	0.562491	-1.16452	-0.21112				0.963579	-0.50212	1.234289	0.10562	0.485064	0.700548	0.044171	1.039422	-0.14665	0.944658	-0.65954
2.72099	-0.54473	0.078757	1.252758	0.272025	-0.31016	-0.96458	-0.81235	-0.66241	0.555198	-1.15877	-0.25345				1.003747	-0.53654	1.383899	0.096722	0.478632	0.694524	0.201674	1.113396	-0.13463	0.930468	-0.63143
2.72919	-0.57008	0.002049	1.271861	0.319798	-0.27687	-0.98586	-0.81723	-0.68371	0.557259	-1.19959	-0.2743				0.99989	-0.54542	1.486909	0.130667	0.475447	0.681157	0.401656	1.305515	-0.13784	0.882452	-0.58545
2.73739	-0.66383	-0.03773	1.305854	0.376414	-0.26657	-0.99174	-0.82215	-0.74679	0.515199	-1.25104	-0.28319				0.944149	-0.5425	1.524153	0.189692	0.463748	0.637671	0.596262	1.5691	-0.16129	0.796042	-0.54579
2.7456	-0.79048	-0.03542	1.324185	0.412735	-0.27483	-0.96259	-0.84134	-0.82543	0.410182	-1.27057	-0.2874				0.880175	-0.53941	1.548891	0.244791	0.450896	0.558279	0.738769	1.81589	-0.2088	0.694082	-0.52829
2.7538	-0.9011	-0.02937	1.314773	0.392759	-0.28568	-0.90306	-0.87301	-0.85825	0.264729	-1.2608	-0.28076				0.852253	-0.54147	1.578829	0.272387	0.445651	0.455038	0.822193	1.983909	-0.28763	0.611907	-0.53786
2.76192	-0.9842	-0.04111	1.301858	0.325837	-0.27578	-0.84622	-0.89207	-0.81391	0.122096	-1.25366	-0.26182				0.877671	-0.53776	1.606401	0.264708	0.448117	0.352197	0.873407	2.074917	-0.39102	0.549773	-0.55897
2.77012	-1.05562	-0.06628	1.293618	0.252125	-0.24379	-0.82361	-0.88167	-0.73869	0.010101	-1.26364	-0.2377				0.931349	-0.52337	1.628428	0.237262	0.460919	0.268947	0.925952	2.127621	-0.50193	0.488633	-0.57514
2.77833	-1.12053	-0.09049	1.294451	0.205479	-0.21035	-0.83978	-0.84903	-0.70047	-0.05876	-1.2701	-0.22021				0.980562	-0.4971	1.64542	0.210195	0.502934	0.217492	0.981848	2.153864	-0.59201	0.435381	-0.57372
2.78653	-1.14839	-0.12724	1.305329	0.190925	-0.20586	-0.87837	-0.81828	-0.71491	-0.08763	-1.25213	-0.21342				1.010953	-0.48151	1.648585	0.207308	0.579288	0.194512	1.01513	2.132939	-0.63579	0.436159	-0.55884
2.79473	-1.10995	-0.20401	1.370893	0.194161	-0.23669	-0.91293	-0.81039	-0.75642	-0.08477	-1.23452	-0.21162				1.012938	-0.50564	1.608011	0.22885	0.67108	0.185602	1.008592	2.043044	-0.6278	0.5421	-0.55082
2.80294	-1.01066	-0.30907	1.522805	0.208205	-0.27742	-0.92722	-0.82382	-0.78034	-0.06858	-1.25923	-0.19853				0.986854	-0.54786	1.520369	0.259199	0.738507	0.174769	0.963819	1.901216	-0.58158	0.747431	-0.56521
2.81114	-0.90064	-0.39287	1.719327	0.235684	-0.30353	-0.92066	-0.84271	-0.7778	-0.06956	-1.34198	-0.15582				0.934879	-0.55637	1.431379	0.287916	0.76723	0.144892	0.896052	1.740366	-0.52371	0.988235	-0.6001
2.81934	-0.83669	-0.4003	1.87809	0.292598	-0.31217	-0.90382	-0.85195	-0.77829	-0.0973	-1.44383	-0.08948				0.878122	-0.49281	1.424459	0.303173	0.783308	0.098294	0.819294	1.602637	-0.47448	1.176462	-0.63771
2.82754	-0.82596	-0.3262	1.939117	0.399183	-0.32464	-0.89056	-0.85203	-0.81716	-0.14138	-1.49605	-0.03162				0.826993	-0.38537	1.532339	0.310447	0.811932	0.05117	0.740629	1.508695	-0.4619	1.26797	-0.66404
2.83575	-0.83753	-0.2122	1.90409	0.570282	-0.35499	-0.88681	-0.85549	-0.91232	-0.18062	-1.46844	-0.03047				0.789948	-0.28917	1.693685	0.30686	0.854907	0.028479	0.668256	1.442266	-0.49921	1.2795	-0.67731
2.84395	-0.83758	-0.10659	1.801926	0.773445	-0.39412	-0.89411	-0.86993	-1.03166	-0.20374	-1.38367	-0.09932				0.781051	-0.24577	1.80561	0.282761	0.892892	0.031459	0.612381	1.384546	-0.56663	1.287938	-0.68713
2.85207	-0.81697	-0.05639	1.680103	0.920648	-0.41988	-0.90182	-0.89159	-1.13745	-0.22145	-1.30563	-0.20498				0.803627	-0.26309	1.79038	0.241377	0.920727	0.03906	0.576963	1.316045	-0.62799	1.370505	-0.70603
2.86028	-0.77433	-0.08196	1.584913	0.932986	-0.42521	-0.89341	-0.9049	-1.21455	-0.24665	-1.28781	-0.29195				0.846096	-0.3254	1.655987	0.204751	0.973099	0.03251	0.560368	1.235256	-0.6506	1.544103	-0.73881
2.86848	-0.71103	-0.18102	1.541522	0.820708	-0.42321	-0.86612	-0.90603	-1.2743	-0.28781	-1.34011	-0.31872				0.875709	-0.40834	1.461593	0.196785	1.087004	0.000977	0.547083	1.162375	-0.65135	1.771455	-0.77844
2.87668	-0.63643	-0.32554	1.551583	0.686528	-0.42825	-0.83301	-0.90708	-1.3233	-0.33382	-1.4312	-0.29				0.893233	-0.46925	1.262356	0.229476	1.260354	-0.04492	0.5181	1.109879	-0.67356	2.011096	-0.8072
2.88488	-0.5634	-0.47214	1.604031	0.609416	-0.45769	-0.8134	-0.92383	-1.34489	-0.36677	-1.50033	-0.24236				0.920648	-0.46732	1.087871	0.300237	1.444244	-0.09901	0.460149	1.070504	-0.73653	2.264829	-0.82011
2.89309	-0.5203	-0.58753	1.70655	0.587321	-0.51585	-0.81581	-0.95115	-1.32814	-0.37505	-1.50132	-0.2191				0.960658	-0.38779	0.973098	0.39056	1.595687	-0.16435	0.375685	1.01114	-0.81762	2.555786	-0.83193
2.90129	-0.51781	-0.66081	1.836891	0.55596	-0.58641	-0.835	-0.96751	-1.28593	-0.35212	-1.4273	-0.23732				0.990384	-0.25758	0.951057	0.483663	1.707645	-0.23959	0.284832	0.926521	-0.87622	2.876628	-0.86175
2.90949	-0.53145	-0.69199	1.931896	0.473541	-0.64519	-0.86271	-0.96417	-1.24333	-0.31034	-1.30659	-0.28218				0.970875	-0.12695	1.001729	0.556453	1.803809	-0.31528	0.207018	0.831414	-0.90661	3.176213	-0.91045
2.9177	-0.52202	-0.6718	1.937574	0.373284	-0.66793	-0.89035	-0.95146	-1.20215	-0.26749	-1.17914	-0.33203				0.916486	-0.03531	1.081859	0.5782	1.911715	-0.37598	0.155897	0.734673	-0.91285	3.391996	-0.95344
2.9259	-0.46401	-0.58411	1.872952	0.294621	-0.65693	-0.91594	-0.94662	-1.16402	-0.23937	-1.07205	-0.36681				0.874435	-0.00718	1.137154	0.541154	2.030802	-0.42327	0.132949	0.622479	-0.89082	3.493492	-0.97809
2.9341	-0.38686	-0.42053	1.844097	0.242734	-0.63236	-0.93717	-0.94921	-1.15678	-0.22869	-0.99801	-0.38855				0.862605	-0.04342	1.160144	0.477403	2.138602	-0.46848	0.139138	0.466739	-0.83405	3.506898	-0.99106
2.94223	-0.33842	-0.19305	1.908935	0.194171	-0.61715	-0.95362	-0.94645	-1.2143	-0.23589	-0.95873	-0.41224				0.861658	-0.10428	1.182089	0.456967	2.191471	-0.52086	0.168531	0.278053	-0.76437	3.472203	-1.00622
2.95043	-0.34457	0.065827	2.035789	0.140869	-0.61038	-0.96965	-0.93517	-1.342	-0.2655	-0.95688	-0.44819				0.841675	-0.12438	1.19787	0.526491	2.175578	-0.57001	0.19588	0.105122	-0.73615	3.423442	-1.02049
2.95863	-0.38747	0.309874	2.149557	0.095378	-0.59206	-0.98683	-0.92896	-1.49048	-0.32066	-0.99236	-0.49473				0.805183	-0.06628	1.184208	0.667171	2.113845	-0.60263	0.193585	-0.0109	-0.78836	3.364877	-1.01456
2.96684	-0.4309	0.479986	2.231168	0.06106	-0.55789	-1.0033	-0.94384	-1.61061	-0.39445	-1.06184	-0.5332				0.756422	0.034229	1.123712	0.808668	2.067565	-0.61698	0.153402	-0.08788	-0.90887	3.276957	-0.99062
2.97504	-0.461	0.537709	2.320525	0.042933	-0.52333	-1.01229	-0.96814	-1.67619	-0.4581	-1.15017	-0.53704				0.700917	0.127651	1.044325	0.873087	2.096565	-0.62488	0.103843	-0.16202	-1.03769	3.134446	-0.96889
2.98324	-0.47209	0.477956	2.433784	0.040506	-0.50687	-1.01417	-0.98358	-1.66431	-0.4851	-1.23675	-0.47632				0.640845	0.183425	0.991204	0.842951	2.199361	-0.636	0.073743	-0.21885	-1.12895	2.951632	-0.97161
2.99144	-0.45795	0.347006	2.536705	0.051072	-0.51096	-1.01424	-0.98593	-1.5791	-0.47069	-1.30354	-0.33597				0.597327	0.203901	0.983183	0.750789	2.324128	-0.63958	0.073754	-0.19504	-1.17784	2.788159	-0.99817
2.99965	-0.41205	0.227759	2.58224	0.053798	-0.52324	-1.01816	-0.98919	-1.44571	-0.44352	-1.33367	-0.13541				0.596605	0.19588	1.018735	0.65941	2.393992	-0.62201	0.076525	-0.0412	-1.20514	2.69365	-1.02186
3.00785	-0.35072	0.17413	2.564619	0.020886	-0.53699	-1.02369	-1.01524	-1.32826	-0.45122	-1.31785	0.07724				0.62862	0.154506	1.073837	0.616269	2.368034	-0.5828	0.056708	0.197868	-1.22823	2.665093	-1.02051
3.01605	-0.30546	0.192942	2.517633	-0.03377	-0.56331	-1.02657	-1.06401	-1.27291	-0.51961	-1.26909	0.247488				0.649708	0.104688	1.148133	0.613952	2.267527	-0.53912	0.016341	0.423545	-1.24501	2.640222	-0.99134
3.02426	-0.29575	0.240318	2.482714	-0.05933	-0.6149	-1.02932	-1.11647	-1.28145	-0.63695	-1.22733	0.357226				0.623208	0.101402	1.245021	0.620063	2.161113	-0.5086	-0.02914	0.558631	-1.25323	2.545668	-0.95504
3.03238	-0.31136	0.27814	2.488501	-0.01782	-0.68003	-1.03613	-1.14784	-1.33283	-0.75778	-1.2344	0.416634				0.566191	0.19052	1.343545	0.610158	2.112395	-0.49252	-0.06376	0.590035	-1.24538	2.370449	-0.94089
3.04058	-0.329	0.307248	2.523728	0.070008	-0.73582	-1.05689	-1.15798	-1.39871	-0.8452	-1.28406	0.443196				0.521569	0.360863	1.410962	0.602472	2.140926	-0.49276	-0.09458	0.583386	-1.21206	2.166889	-0.96746
3.04878	-0.35486	0.348267	2.56465	0.158688	-0.76643	-1.08423	-1.16698	-1.45716	-0.89183	-1.33026	0.441212				0.508036	0.550396	1.417882	0.620764	2.233593	-0.50873	-0.13383	0.59607	-1.14169	1.990683	-1.02588
3.05699	-0.39554	0.409488	2.589199	0.215968	-0.77999	-1.09841	-1.18673	-1.46533	-0.90677	-1.31804	0.409239				0.510393	0.689332	1.375231	0.651642	2.365361	-0.52818	-0.18873	0.644852	-1.01623	1.859748	-1.07883
3.06519	-0.44367	0.456406	2.586885	0.214378	-0.79714	-1.08362	-1.21469	-1.39976	-0.90706	-1.23862	0.346998				0.49279	0.722776	1.315409	0.656153	2.51546	-0.53928	-0.24463	0.686838	-0.83593	1.767233	-1.09283
3.07339	-0.48084	0.446188	2.55121	0.14292	-0.81192	-1.04237	-1.23249	-1.29631	-0.89027	-1.12763	0.261143				0.450287	0.64436	1.286131	0.624574	2.663975	-0.53855	-0.27437	0.656558	-0.61556	1.694405	-1.06073
3.0816	-0.48228	0.357353	2.46534	0.008249	-0.80233	-1.00082	-1.22942	-1.22744	-0.85055	-1.02277	0.168946				0.398504	0.501496	1.331011	0.600649	2.776231	-0.53966	-0.26679	0.528007	-0.40151	1.633258	-1.00835
3.0898	-0.44919	0.208731	2.335971	-0.12956	-0.76026	-0.98084	-1.2122	-1.24641	-0.78321	-0.94446	0.086957				0.348096	0.379475	1.466642	0.62784	2.841276	-0.55807	-0.22872	0.331788	-0.2463	1.582164	-0.96299
3.098	-0.3937	0.046695	2.184321	-0.20317	-0.71546	-0.99567	-1.19902	-1.3285	-0.69267	-0.89988	0.0374				0.312314	0.335504	1.646603	0.705842	2.892852	-0.59754	-0.19065	0.140221	-0.17878	1.532553	-0.93373
3.10621	-0.34389	-0.07609	2.068347	-0.19483	-0.70143	-1.04393	-1.1962	-1.39767	-0.59809	-0.889	0.036604				0.300597	0.349133	1.777598	0.797542	2.982249	-0.64869	-0.17847	-0.00248	-0.17868	1.476249	-0.9116
3.11441	-0.32371	-0.11602	2.002197	-0.14246	-0.72137	-1.1071	-1.19918	-1.37824	-0.51913	-0.90661	0.073035				0.337777	0.358458	1.808142	0.87194	3.126946	-0.69414	-0.19688	-0.11114	-0.19114	1.398801	-0.88027
3.12253	-0.33293	-0.06395	1.919058	-0.08434	-0.7593	-1.16022	-1.20822	-1.25164	-0.46294	-0.94505	0.128843				0.416513	0.318717	1.753314	0.918141	3.305385	-0.72694	-0.22547	-0.21075	-0.17715	1.297168	-0.8397
3.13073	-0.34541	0.055211	1.768858	0.000736	-0.79074	-1.17796	-1.22303	-1.05997	-0.41969	-1.00272	0.190764				0.493117	0.248359	1.686324	0.923931	3.479317	-0.75056	-0.23437	-0.28767	-0.13859	1.179096	-0.80259
3.13894	-0.30114	0.187138	1.574744	0.133616	-0.80227	-1.15302	-1.24197	-0.88692	-0.37689	-1.08074	0.249366				0.526327	0.180268	1.65684	0.88841	3.620859	-0.77133	-0.21102	-0.27531	-0.10137	1.06537	-0.78508
3.14714	-0.1764	0.281535	1.430115	0.309656	-0.79077	-1.10027	-1.26169	-0.80694	-0.33144	-1.17346	0.288835				0.50657	0.13503	1.667668	0.830836	3.73266	-0.79282	-0.16454	-0.13921	-0.08604	0.982065	-0.78662
3.15534	-0.00787	0.314512	1.390768	0.493999	-0.75315	-1.04846	-1.28518	-0.81716	-0.2843	-1.25192	0.29521				0.464147	0.123135	1.72072	0.794887	3.822	-0.80349	-0.11798	0.072324	-0.08835	0.938932	-0.78425
3.16355	0.127016	0.294301	1.424221	0.646479	-0.69933	-1.01412	-1.31339	-0.86458	-0.22989	-1.28567	0.267499				0.428579	0.149393	1.817374	0.806746	3.889306	-0.79245	-0.08156	0.26797	-0.09749	0.937442	-0.76073
3.17175	0.176032	0.24937	1.485834	0.77515	-0.64605	-0.99291	-1.34091	-0.88327	-0.14972	-1.2702	0.217202				0.41658	0.217439	1.957931	0.844221	3.92727	-0.76728	-0.06493	0.413347	-0.1042	0.964567	-0.71476
3.17995	0.159759	0.187414	1.540643	0.920205	-0.60711	-0.97912	-1.35992	-0.8568	-0.043	-1.2354	0.170386				0.415013	0.302124	2.093933	0.871693	3.940753	-0.75246	-0.07153	0.532159	-0.10537	0.998086	-0.66766
3.18816	0.131261	0.112693	1.582629	1.111607	-0.57593	-0.97101	-1.36039	-0.81694	0.072912	-1.22277	0.152101				0.397286	0.376658	2.156039	0.868015	3.94843	-0.76392	-0.08469	0.642927	-0.09835	1.011093	-0.63968
3.19636	0.127986	0.03766	1.596208	1.324296	-0.54079	-0.96939	-1.34145	-0.77975	0.168345	-1.23023	0.178768				0.361346	0.429156	2.121409	0.85637	3.955304	-0.79843	-0.07841	0.726702	-0.08486	0.974836	-0.63271
3.20456	0.149519	-0.01857	1.576843	1.500403	-0.50559	-0.97008	-1.31513	-0.75274	0.222633	-1.21933	0.252132				0.330639	0.453413	2.023228	0.868971	3.947684	-0.83624	-0.03732	0.742487	-0.07354	0.879171	-0.64048
3.21268	0.174601	-0.02706	1.547509	1.60487	-0.48163	-0.96837	-1.2933	-0.74541	0.237673	-1.15341	0.356034				0.330008	0.453918	1.934981	0.912121	3.900003	-0.85168	0.019769	0.697067	-0.07892	0.726437	-0.65369
3.22089	0.178375	0.009166	1.539331	1.638196	-0.47127	-0.95826	-1.28482	-0.7819	0.221166	-1.04707	0.466267				0.359542	0.438838	1.897063	0.971154	3.809768	-0.83361	0.056396	0.64071	-0.12469	0.547427	-0.66886
3.22909	0.146573	0.073756	1.575114	1.627398	-0.46693	-0.94081	-1.28815	-0.85936	0.184592	-0.9547	0.563218				0.416941	0.444492	1.905002	1.026229	3.713056	-0.78804	0.049879	0.61044	-0.20597	0.402576	-0.68579
3.23729	0.091854	0.15321	1.642638	1.576812	-0.48108	-0.92916	-1.29696	-0.93256	0.130346	-0.9137	0.646017				0.489666	0.505966	1.922544	1.082672	3.639901	-0.74922	0.012027	0.594374	-0.29999	0.349586	-0.70683
3.2455	0.040458	0.247115	1.733939	1.479628	-0.52463	-0.93017	-1.30318	-0.95832	0.06009	-0.91333	0.719652				0.55823	0.606308	1.924883	1.146563	3.585397	-0.74909	-0.02901	0.558142	-0.3847	0.401876	-0.73696
3.2537	0.031084	0.35839	1.826738	1.351458	-0.59181	-0.94749	-1.29879	-0.92061	-0.02629	-0.90589	0.784095				0.587595	0.685064	1.935023	1.202966	3.514943	-0.80096	-0.06101	0.509547	-0.44829	0.525393	-0.77379
3.2619	0.077558	0.46063	1.884694	1.253609	-0.65811	-0.98061	-1.27919	-0.85239	-0.1311	-0.88229	0.828098				0.548396	0.691461	1.981265	1.229357	3.410491	-0.89034	-0.09017	0.456874	-0.50166	0.674898	-0.80306
3.27011	0.165801	0.510165	1.873831	1.238429	-0.69246	-1.01571	-1.24072	-0.80692	-0.22892	-0.87533	0.841649				0.46877	0.634898	2.059661	1.232194	3.289506	-0.96947	-0.11283	0.400018	-0.54947	0.824337	-0.81034
3.27831	0.265122	0.479208	1.800197	1.293128	-0.68239	-1.03597	-1.18477	-0.81209	-0.29618	-0.90932	0.821805				0.412656	0.558354	2.130751	1.256078	3.175693	-1.00009	-0.11742	0.329603	-0.59341	0.979424	-0.80348
3.28651	0.341695	0.395651	1.701644	1.364384	-0.63324	-1.03666	-1.11917	-0.85975	-0.33406	-0.97168	0.76357				0.419219	0.49498	2.164322	1.326946	3.082009	-0.97628	-0.09643	0.235682	-0.63054	1.118602	-0.80312
3.29471	0.377863	0.326544	1.602071	1.390033	-0.56597	-1.03405	-1.05907	-0.92678	-0.37436	-1.01666	0.668131				0.461508	0.447879	2.158681	1.4278	2.99987	-0.93496	-0.06805	0.144424	-0.66809	1.202463	-0.82322
3.30292	0.357826	0.301349	1.549592	1.347143	-0.49946	-1.04296	-1.01898	-1.00757	-0.4445	-1.01622	0.538005				0.490343	0.406266	2.123266	1.521332	2.913628	-0.91531	-0.06597	0.087214	-0.71734	1.217516	-0.85265
3.31104	0.292905	0.284342	1.585962	1.245287	-0.45297	-1.06638	-1.00364	-1.1043	-0.53161	-0.98151	0.386629				0.516426	0.365782	2.058987	1.595721	2.812901	-0.92547	-0.10027	0.073406	-0.76534	1.180945	-0.87404
3.31924	0.206798	0.217731	1.718339	1.118407	-0.4353	-1.09904	-1.01339	-1.21742	-0.60185	-0.94176	0.249066				0.571875	0.319341	1.946896	1.66494	2.704078	-0.95081	-0.15544	0.067693	-0.79893	1.129439	-0.89307
3.32745	0.102659	0.105161	1.887595	0.996681	-0.43274	-1.12804	-1.04058	-1.32118	-0.64013	-0.90009	0.155739				0.676378	0.27224	1.814182	1.739066	2.610544	-0.96579	-0.19865	0.021586	-0.80822	1.08162	-0.91877
3.33565	-0.02079	0.016853	2.006131	0.884731	-0.43217	-1.14866	-1.0743	-1.36871	-0.67311	-0.82583	0.116852				0.809514	0.239484	1.713827	1.815921	2.560148	-0.96851	-0.21618	-0.07189	-0.79568	1.040977	-0.95241
3.34385	-0.15588	0.019513	2.053009	0.784599	-0.42606	-1.15558	-1.10504	-1.33868	-0.72421	-0.69919	0.108203				0.93383	0.246441	1.654198	1.888983	2.567732	-0.9742	-0.21572	-0.17452	-0.77729	0.995935	-0.97808
3.35206	-0.26666	0.102812	2.076216	0.699839	-0.41653	-1.1368	-1.13019	-1.2606	-0.7726	-0.53404	0.090576				1.04581	0.291945	1.586919	1.978745	2.606002	-0.99985	-0.22066	-0.2403	-0.76184	0.918519	-0.98202
3.36026	-0.31764	0.204732	2.120224	0.64411	-0.41367	-1.08609	-1.14931	-1.20637	-0.77591	-0.36656	0.036036				1.153381	0.353382	1.45287	2.094338	2.636218	-1.05482	-0.24861	-0.27541	-0.74502	0.794754	-0.97081
3.36846	-0.31582	0.281924	2.164817	0.634439	-0.41401	-1.01879	-1.15498	-1.20322	-0.72115	-0.23288	-0.05639				1.264222	0.410148	1.276569	2.210747	2.6369	-1.13366	-0.2984	-0.32385	-0.7281	0.637013	-0.96315
3.37666	-0.30306	0.332132	2.153584	0.661929	-0.40949	-0.96081	-1.14821	-1.23237	-0.64326	-0.15807	-0.16646				1.372503	0.440215	1.132641	2.284856	2.615455	-1.21175	-0.35068	-0.41701	-0.7338	0.484456	-0.97659
3.38487	-0.31873	0.381166	2.065415	0.704482	-0.39191	-0.92079	-1.13356	-1.24132	-0.59668	-0.14418	-0.26648				1.457756	0.431202	1.100157	2.284963	2.586675	-1.2571	-0.3746	-0.5401	-0.78209	0.376182	-1.00883
3.39307	-0.35502	0.435288	1.909506	0.729765	-0.36556	-0.89342	-1.12182	-1.18749	-0.61375	-0.15899	-0.33488				1.494226	0.376254	1.199356	2.232272	2.54896	-1.26013	-0.36412	-0.65199	-0.86532	0.31378	-1.0476
3.40119	-0.3763	0.47685	1.720947	0.729158	-0.3486	-0.87189	-1.1192	-1.08081	-0.68004	-0.15123	-0.36547				1.474085	0.293267	1.348718	2.168315	2.497932	-1.23551	-0.32933	-0.73007	-0.94928	0.27968	-1.07477
3.40939	-0.3552	0.500197	1.540535	0.715144	-0.35578	-0.86091	-1.12623	-0.95692	-0.76519	-0.08237	-0.36851				1.424861	0.221505	1.439029	2.135607	2.438246	-1.21558	-0.29701	-0.77628	-0.99852	0.251737	-1.07137
3.4176	-0.2962	0.520762	1.397063	0.703249	-0.37799	-0.86005	-1.1439	-0.85863	-0.86106	0.020253	-0.36713				1.375491	0.172274	1.41348	2.15432	2.397425	-1.22109	-0.28175	-0.82544	-1.00764	0.217506	-1.04156
3.4258	-0.22697	0.56889	1.293926	0.701419	-0.37337	-0.85434	-1.16749	-0.80137	-0.96707	0.088707	-0.38282				1.344581	0.130202	1.325494	2.208718	2.389713	-1.24793	-0.27248	-0.90764	-0.98897	0.170327	-1.00356
3.434	-0.18005	0.653017	1.205649	0.707805	-0.30825	-0.82487	-1.19158	-0.78558	-1.07767	0.082183	-0.41749				1.328173	0.064727	1.263374	2.26625	2.393743	-1.28656	-0.25107	-1.01312	-0.95635	0.114233	-0.96984
3.44221	-0.17127	0.764343	1.120967	0.722503	-0.18543	-0.76299	-1.20918	-0.82578	-1.16309	0.024948	-0.45524				1.30536	-0.03373	1.248832	2.288716	2.386365	-1.32813	-0.20482	-1.10007	-0.90556	0.061171	-0.93433
3.45041	-0.18644	0.880489	1.065819	0.750281	-0.0432	-0.68858	-1.21906	-0.91695	-1.19979	-0.02584	-0.47256				1.268574	-0.14431	1.246548	2.274836	2.341173	-1.36605	-0.15841	-1.12238	-0.83028	0.020247	-0.88059
3.45861	-0.19733	0.964712	1.071806	0.797477	0.085378	-0.62428	-1.22703	-1.03357	-1.19957	-0.05027	-0.46566				1.220693	-0.24049	1.229886	2.255455	2.251093	-1.38809	-0.1382	-1.0935	-0.72829	-0.01163	-0.80459
3.46682	-0.18583	0.998829	1.1087	0.84682	0.207133	-0.58055	-1.23588	-1.13509	-1.19066	-0.06798	-0.45253				1.162831	-0.3024	1.244305	2.258374	2.139889	-1.38422	-0.1461	-1.04659	-0.59075	-0.06159	-0.71919
3.47502	-0.16203	0.978229	1.108361	0.87482	0.351433	-0.56257	-1.24379	-1.19298	-1.19456	-0.0953	-0.44686				1.07734	-0.32417	1.340518	2.278943	2.047144	-1.35919	-0.15625	-1.00567	-0.42288	-0.14759	-0.63939
3.48322	-0.1521	0.92802	1.053506	0.878605	0.523849	-0.56636	-1.24635	-1.20314	-1.20459	-0.12751	-0.44515				0.972217	-0.28635	1.495384	2.277681	1.995291	-1.32676	-0.13543	-0.96953	-0.24733	-0.26536	-0.56436
3.49134	-0.1742	0.884385	1.003141	0.866768	0.684417	-0.58562	-1.2442	-1.18625	-1.20466	-0.14776	-0.42685				0.870691	-0.19011	1.635473	2.234763	1.981189	-1.30418	-0.08065	-0.92684	-0.09606	-0.38127	-0.49443
3.49955	-0.23499	0.856987	1.029943	0.858022	0.806221	-0.60474	-1.23823	-1.17337	-1.19596	-0.16032	-0.38496				0.794267	-0.06343	1.735896	2.178739	1.97305	-1.28878	-0.01172	-0.90666	0.005467	-0.46385	-0.43325
3.50775	-0.30336	0.822576	1.131923	0.855537	0.896536	-0.62071	-1.23303	-1.16707	-1.20067	-0.18165	-0.32552				0.759884	0.041534	1.820084	2.16462	1.931411	-1.26061	0.042757	-0.93395	0.066826	-0.50381	-0.3897
3.51595	-0.34421	0.756414	1.279792	0.859611	0.992117	-0.63901	-1.23392	-1.14384	-1.24642	-0.22491	-0.26662				0.746881	0.092931	1.878627	2.212833	1.852861	-1.21306	0.079528	-0.9934	0.121198	-0.50595	-0.36828
3.52416	-0.34001	0.666889	1.441981	0.860439	1.122249	-0.66457	-1.24311	-1.07996	-1.33239	-0.2861	-0.23819				0.721813	0.114325	1.880883	2.292452	1.765959	-1.157	0.109612	-1.04377	0.206259	-0.49024	-0.35802
3.53236	-0.29283	0.577346	1.593939	0.828655	1.269727	-0.70025	-1.26025	-0.99486	-1.42874	-0.35184	-0.26143				0.650802	0.14486	1.808761	2.356763	1.696549	-1.11573	0.140619	-1.06159	0.336114	-0.47149	-0.34728
3.54056	-0.23103	0.507029	1.71871	0.76234	1.398259	-0.74401	-1.2796	-0.93774	-1.50156	-0.41544	-0.34272				0.532361	0.198817	1.715134	2.380828	1.648649	-1.10506	0.158049	-1.05328	0.494401	-0.46541	-0.32818
3.54877	-0.17752	0.464551	1.762578	0.682541	1.483727	-0.79339	-1.29845	-0.95466	-1.53912	-0.47388	-0.45431				0.410299	0.240384	1.685595	2.392086	1.604679	-1.12717	0.136198	-1.02552	0.649294	-0.48377	-0.31192
3.55697	-0.14463	0.452182	1.70652	0.617545	1.530802	-0.83916	-1.31542	-1.05816	-1.55242	-0.52765	-0.5511				0.338781	0.225892	1.735057	2.422402	1.546599	-1.17736	0.069855	-0.9911	0.759869	-0.52514	-0.32337
3.56517	-0.13903	0.458436	1.596933	0.575792	1.554364	-0.8676	-1.33294	-1.19635	-1.56153	-0.56958	-0.59751				0.337304	0.148402	1.80151	2.483828	1.467758	-1.24168	-0.02276	-0.95312	0.818381	-0.58326	-0.37763
3.57337	-0.16601	0.460249	1.487423	0.541791	1.553049	-0.86839	-1.35174	-1.30613	-1.57597	-0.59317	-0.59509				0.353982	0.048867	1.795649	2.563611	1.387878	-1.29896	-0.10914	-0.90267	0.836808	-0.63819	-0.4717
3.5815	-0.22623	0.458764	1.393236	0.496984	1.522699	-0.84531	-1.36499	-1.35393	-1.58611	-0.59342	-0.57573				0.327166	-0.01669	1.693657	2.637266	1.323032	-1.32242	-0.17355	-0.8203	0.828469	-0.66933	-0.57288
3.5897	-0.30318	0.460301	1.289884	0.424698	1.469121	-0.81494	-1.36717	-1.35306	-1.58537	-0.56993	-0.55874				0.245961	-0.04784	1.543002	2.700176	1.27398	-1.3037	-0.21231	-0.70271	0.801305	-0.6587	-0.65115
3.5979	-0.37966	0.461726	1.177535	0.344523	1.421248	-0.78974	-1.35093	-1.33297	-1.57382	-0.53428	-0.54101				0.155204	-0.07916	1.427554	2.762912	1.238617	-1.25603	-0.23374	-0.58572	0.763185	-0.603	-0.69051
3.60611	-0.43534	0.446171	1.064014	0.269511	1.398606	-0.78071	-1.31458	-1.30134	-1.55469	-0.50303	-0.51115				0.102575	-0.13354	1.403436	2.850291	1.212119	-1.21	-0.24769	-0.52295	0.723799	-0.53463	-0.69399
3.61431	-0.45011	0.395945	0.98663	0.202262	1.388207	-0.79403	-1.26379	-1.25828	-1.53267	-0.49402	-0.47044				0.085073	-0.20331	1.429123	2.95583	1.196318	-1.18515	-0.25258	-0.55512	0.694717	-0.49715	-0.67285
3.62251	-0.41801	0.316378	0.971601	0.139145	1.362106	-0.83286	-1.2073	-1.20083	-1.51381	-0.50551	-0.43333				0.077585	-0.25099	1.444395	3.042286	1.184575	-1.181	-0.24329	-0.65661	0.687707	-0.50821	-0.63791
3.63072	-0.35239	0.215425	0.99362	0.068187	1.312346	-0.88532	-1.15098	-1.16482	-1.5065	-0.5252	-0.4142				0.062045	-0.26124	1.434489	3.071019	1.161546	-1.1931	-0.21902	-0.76905	0.696403	-0.53839	-0.60651
3.63892	-0.28836	0.107916	0.994207	-0.01067	1.265167	-0.92434	-1.09282	-1.20348	-1.50361	-0.53563	-0.42038				0.047025	-0.24124	1.426674	3.012571	1.120326	-1.20833	-0.18895	-0.84931	0.70845	-0.54601	-0.58944
3.64712	-0.2481	0.002714	0.930294	-0.0713	1.242799	-0.93641	-1.02676	-1.31583	-1.49538	-0.52688	-0.44257				0.033222	-0.2101	1.45525	2.888542	1.061956	-1.21967	-0.17304	-0.89265	0.699502	-0.51565	-0.58196
3.65533	-0.24147	-0.0749	0.827666	-0.07643	1.235121	-0.92716	-0.95045	-1.46036	-1.47868	-0.51701	-0.46831				0.014885	-0.18551	1.512885	2.741568	1.005447	-1.22014	-0.17878	-0.93314	0.643501	-0.47061	-0.56944
3.66353	-0.26106	-0.09839	0.759233	-0.02133	1.208899	-0.91207	-0.86824	-1.57395	-1.46339	-0.52689	-0.48476				-0.01234	-0.20874	1.545492	2.60135	0.961427	-1.21156	-0.19221	-0.98407	0.54887	-0.44843	-0.54402
3.67165	-0.30422	-0.07377	0.790572	0.064585	1.150931	-0.89481	-0.78955	-1.60445	-1.47377	-0.56849	-0.48864				-0.0501	-0.31291	1.506996	2.490879	0.934268	-1.20459	-0.18815	-1.01989	0.449236	-0.46226	-0.51479
3.67985	-0.35982	-0.02178	0.896131	0.139251	1.076282	-0.86863	-0.71215	-1.51281	-1.51109	-0.6398	-0.48944				-0.05655	-0.45929	1.41813	2.422468	0.927572	-1.19799	-0.15273	-0.99021	0.377767	-0.4991	-0.49307
3.68805	-0.3978	0.03392	0.981091	0.173203	1.002601	-0.83996	-0.62665	-1.30829	-1.55746	-0.72391	-0.50008				-0.00449	-0.55042	1.323719	2.390288	0.939506	-1.18926	-0.10925	-0.88308	0.320129	-0.5268	-0.48133
3.69626	-0.39631	0.072633	0.993713	0.175977	0.935404	-0.82313	-0.52708	-1.0731	-1.59168	-0.79825	-0.53993				0.076514	-0.51362	1.246534	2.36313	0.970078	-1.17036	-0.09918	-0.76714	0.233326	-0.52822	-0.47048
3.70446	-0.36192	0.087316	0.943718	0.164746	0.865771	-0.83179	-0.40691	-0.92491	-1.60877	-0.83691	-0.61415				0.110514	-0.3776	1.182708	2.318315	1.008504	-1.14499	-0.1428	-0.72299	0.096335	-0.51541	-0.46625
3.71266	-0.34668	0.083283	0.889959	0.151589	0.794044	-0.86195	-0.26764	-0.94596	-1.62259	-0.83259	-0.71016				0.042728	-0.23783	1.111329	2.25044	1.033929	-1.12496	-0.22471	-0.7712	-0.0698	-0.51336	-0.48722
3.72087	-0.37736	0.069964	0.869853	0.136226	0.738884	-0.89682	-0.10534	-1.10893	-1.63784	-0.79701	-0.8016				-0.09527	-0.17188	1.039661	2.188265	1.026295	-1.11299	-0.30571	-0.85492	-0.21034	-0.54058	-0.53992
3.72907	-0.4277	0.051618	0.866397	0.119949	0.710494	-0.92723	0.084741	-1.31166	-1.64503	-0.75819	-0.86179				-0.22075	-0.19125	1.000037	2.159622	0.986838	-1.10443	-0.35331	-0.92092	-0.29233	-0.58417	-0.61082
3.73727	-0.45636	0.028971	0.829518	0.122742	0.703559	-0.94987	0.295911	-1.47482	-1.63487	-0.74251	-0.89106				-0.25975	-0.25003	1.033484	2.142089	0.937736	-1.09465	-0.35421	-0.97865	-0.32629	-0.62656	-0.67229
3.74548	-0.43555	-0.00078	0.720024	0.146523	0.694914	-0.96545	0.495376	-1.58639	-1.60872	-0.7553	-0.90546				-0.211	-0.30478	1.139562	2.096235	0.901052	-1.0938	-0.32677	-1.07081	-0.3343	-0.65448	-0.71301
3.75368	-0.38564	-0.03452	0.586212	0.184828	0.668782	-0.96931	0.646739	-1.65903	-1.57497	-0.78658	-0.9242				-0.13006	-0.3295	1.284342	2.009614	0.886332	-1.10851	-0.30445	-1.20922	-0.33006	-0.66301	-0.73832
3.7618	-0.33701	-0.06725	0.506113	0.217567	0.628459	-0.95646	0.735173	-1.67904	-1.54607	-0.81782	-0.94973				-0.05555	-0.32726	1.422629	1.925716	0.883616	-1.13308	-0.31947	-1.34011	-0.30258	-0.65499	-0.75866
3.77	-0.30075	-0.10543	0.546586	0.226958	0.591454	-0.93328	0.776067	-1.62872	-1.54028	-0.83246	-0.97164				-0.00868	-0.32746	1.49581	1.899935	0.879764	-1.14897	-0.37128	-1.38712	-0.24554	-0.62512	-0.77894
3.77821	-0.26469	-0.14694	0.712293	0.199488	0.582468	-0.9158	0.799627	-1.50487	-1.56572	-0.81786	-0.98785				0.009901	-0.35373	1.499704	1.948923	0.870076	-1.13893	-0.42301	-1.29992	-0.17349	-0.58482	-0.79301
3.78641	-0.21566	-0.1785	0.942839	0.118841	0.610036	-0.91782	0.81345	-1.34591	-1.61748	-0.77921	-0.99982				0.011096	-0.40789	1.464991	2.032129	0.853045	-1.09615	-0.4331	-1.09122	-0.11555	-0.55569	-0.80119
3.79461	-0.17135	-0.17488	1.175791	-0.00634	0.669641	-0.93839	0.808688	-1.19282	-1.67486	-0.73713	-1.00976				0.007792	-0.43967	1.402872	2.078363	0.833071	-1.02675	-0.38593	-0.83393	-0.08807	-0.55809	-0.80524
3.80282	-0.16148	-0.13415	1.365894	-0.13905	0.748625	-0.96261	0.771073	-1.05169	-1.71346	-0.7099	-1.01335				-0.00502	-0.4015	1.28946	2.058867	0.811811	-0.95237	-0.312	-0.62249	-0.09121	-0.59992	-0.80179
3.81102	-0.20106	-0.07051	1.462457	-0.23484	0.838867	-0.97264	0.701927	-0.93125	-1.70982	-0.69597	-1.00184				-0.06536	-0.29949	1.102345	1.995825	0.79353	-0.89737	-0.24316	-0.53672	-0.11358	-0.66424	-0.78392
3.81922	-0.27121	0.003128	1.404377	-0.28178	0.944244	-0.96404	0.618675	-0.82937	-1.65617	-0.6636	-0.96458				-0.19517	-0.18473	0.913345	1.945295	0.766178	-0.881	-0.19721	-0.59306	-0.14344	-0.72625	-0.74921
3.82743	-0.32206	0.069679	1.183476	-0.30533	1.06715	-0.94465	0.534025	-0.75716	-1.57455	-0.59819	-0.89629				-0.38037	-0.11842	0.830821	1.95101	0.725997	-0.89897	-0.17385	-0.74786	-0.17893	-0.77737	-0.70892
3.83563	-0.3162	0.139028	0.908321	-0.32477	1.198341	-0.92165	0.459842	-0.73568	-1.50545	-0.52495	-0.80737				-0.55687	-0.11739	0.904911	1.994679	0.691303	-0.92567	-0.16155	-0.9105	-0.20011	-0.83062	-0.67466
3.84383	-0.26335	0.219597	0.73905	-0.34705	1.316455	-0.89983	0.402252	-0.77195	-1.4911	-0.48084	-0.7199				-0.66623	-0.16563	1.067398	2.032443	0.679731	-0.942	-0.15081	-1.00662	-0.18882	-0.90975	-0.65006
3.85204	-0.21615	0.309287	0.772179	-0.36672	1.395616	-0.87129	0.362513	-0.83325	-1.53721	-0.48354	-0.65729				-0.67995	-0.22419	1.187606	2.044838	0.69561	-0.9425	-0.12246	-1.02384	-0.1488	-1.01889	-0.628
3.86016	-0.20887	0.392058	0.947159	-0.38015	1.408444	-0.83731	0.326041	-0.84153	-1.61014	-0.50917	-0.62197				-0.6068	-0.26636	1.206332	2.063246	0.711859	-0.93471	-0.07888	-0.99217	-0.1064	-1.12183	-0.60398
3.86836	-0.25012	0.443545	1.123992	-0.38819	1.355969	-0.80923	0.275526	-0.74046	-1.66561	-0.52819	-0.60507				-0.4888	-0.28348	1.162511	2.12943	0.69883	-0.92203	-0.03736	-0.9781	-0.08973	-1.15785	-0.58417
3.87656	-0.32803	0.465907	1.221897	-0.3895	1.272893	-0.80036	0.212884	-0.53414	-1.66654	-0.53499	-0.60291				-0.3707	-0.26965	1.139988	2.246086	0.65975	-0.90379	-0.02228	-1.01899	-0.09978	-1.10638	-0.57653
3.88477	-0.42496	0.4773	1.258359	-0.38426	1.198323	-0.81348	0.152072	-0.30959	-1.60791	-0.55318	-0.62312				-0.29727	-0.23332	1.155989	2.366124	0.621204	-0.88975	-0.03901	-1.09827	-0.12851	-1.0095	-0.57094
3.89297	-0.51504	0.494272	1.257434	-0.38455	1.14614	-0.82926	0.114202	-0.16988	-1.50952	-0.60234	-0.67297				-0.28069	-0.19323	1.18297	2.440752	0.603007	-0.89262	-0.0644	-1.16745	-0.1649	-0.9452	-0.5399
3.90117	-0.55498	0.508834	1.190944	-0.42445	1.089561	-0.83003	0.098243	-0.16075	-1.41034	-0.66697	-0.73276				-0.30511	-0.17155	1.198833	2.466319	0.600825	-0.92164	-0.07995	-1.17788	-0.20269	-0.95794	-0.4755
3.90938	-0.51564	0.508411	1.057024	-0.49899	1.00433	-0.81297	0.087035	-0.24667	-1.35274	-0.71935	-0.78046				-0.34514	-0.17959	1.201489	2.459474	0.611473	-0.96876	-0.08628	-1.14417	-0.2422	-1.02824	-0.39896
3.91758	-0.41279	0.497882	0.906439	-0.56445	0.902995	-0.79644	0.066032	-0.35454	-1.34954	-0.73264	-0.80727				-0.38695	-0.21755	1.20098	2.420704	0.636536	-1.00985	-0.10196	-1.11773	-0.27468	-1.09592	-0.34965
3.92578	-0.31411	0.497485	0.819612	-0.5759	0.823287	-0.80061	0.038455	-0.42438	-1.37991	-0.70215	-0.82086				-0.44606	-0.26974	1.190812	2.339724	0.674492	-1.02384	-0.13286	-1.13662	-0.2951	-1.10568	-0.3578
3.93399	-0.27841	0.524477	0.82816	-0.52873	0.788778	-0.82176	0.009963	-0.43109	-1.40477	-0.64881	-0.83638				-0.51366	-0.32341	1.148656	2.225295	0.700003	-0.99909	-0.1675	-1.18165	-0.29954	-1.04237	-0.41419
3.94219	-0.29489	0.560434	0.874806	-0.47005	0.782817	-0.84544	-0.02355	-0.40534	-1.40478	-0.60107	-0.85682				-0.56461	-0.3848	1.034915	2.117141	0.674286	-0.93639	-0.18572	-1.21083	-0.28476	-0.92346	-0.48673
3.95031	-0.32386	0.56686	0.92639	-0.43432	0.789259	-0.86412	-0.06388	-0.40399	-1.38227	-0.57682	-0.8732				-0.57547	-0.45017	0.871147	2.055931	0.599581	-0.84268	-0.18118	-1.21645	-0.24437	-0.78578	-0.53886
3.95851	-0.32979	0.519	0.977187	-0.4186	0.800656	-0.88571	-0.11073	-0.44499	-1.34789	-0.57214	-0.87021				-0.54811	-0.50296	0.730646	2.067196	0.517065	-0.72538	-0.1638	-1.23	-0.18525	-0.65869	-0.55391
3.96672	-0.30662	0.431116	1.031471	-0.39214	0.80728	-0.92273	-0.15819	-0.4976	-1.31302	-0.57547	-0.8474				-0.52671	-0.52201	0.667838	2.144283	0.470287	-0.60794	-0.15159	-1.28228	-0.14289	-0.53757	-0.5345
3.97492	-0.26604	0.341599	1.0619	-0.35335	0.795682	-0.97534	-0.20531	-0.50949	-1.28357	-0.58058	-0.82186				-0.54733	-0.50085	0.698203	2.268081	0.461345	-0.51378	-0.16354	-1.35311	-0.1556	-0.41848	-0.49721
3.98312	-0.21734	0.277225	1.060218	-0.34416	0.759213	-1.02694	-0.2536	-0.47597	-1.26442	-0.5883	-0.80845				-0.61134	-0.47149	0.792683	2.415277	0.467749	-0.4605	-0.20163	-1.39838	-0.23659	-0.31943	-0.47247
3.99133	-0.17825	0.246234	1.08307	-0.37539	0.711285	-1.05862	-0.30284	-0.4407	-1.26168	-0.58647	-0.80603				-0.68139	-0.46544	0.922632	2.539455	0.465212	-0.44039	-0.25449	-1.38499	-0.36329	-0.27395	-0.47911
3.99953	-0.1661	0.224511	1.166765	-0.41593	0.658475	-1.06971	-0.35081	-0.45398	-1.28222	-0.55149	-0.7909				-0.71488	-0.49777	1.054796	2.60149	0.438244	-0.42491	-0.29765	-1.30685	-0.49549	-0.28344	-0.51779
4.00773	-0.1963	0.193426	1.296596	-0.42355	0.591545	-1.07498	-0.39024	-0.53529	-1.31909	-0.46651	-0.74488				-0.68622	-0.56295	1.137415	2.585482	0.391196	-0.38805	-0.3063	-1.1897	-0.59937	-0.30261	-0.57154
4.01594	-0.25727	0.146508	1.40376	-0.38833	0.50587	-1.09288	-0.41746	-0.65407	-1.36783	-0.328	-0.67166				-0.59905	-0.65208	1.148794	2.516643	0.326173	-0.33592	-0.28048	-1.08192	-0.65531	-0.2953	-0.61646
4.02414	-0.32224	0.079223	1.426288	-0.33175	0.422441	-1.12484	-0.43736	-0.7728	-1.43371	-0.15707	-0.5961				-0.49639	-0.73618	1.117149	2.424819	0.256266	-0.3031	-0.24119	-1.04599	-0.66259	-0.27339	-0.64568
4.03234	-0.37842	0.000174	1.367267	-0.27369	0.377521	-1.15558	-0.45505	-0.85096	-1.51421	0.012598	-0.54115				-0.42078	-0.75551	1.111137	2.316781	0.197788	-0.31852	-0.20875	-1.09511	-0.62843	-0.27067	-0.66587
4.04046	-0.4256	-0.08221	1.278774	-0.23416	0.38747	-1.16295	-0.47446	-0.87296	-1.6046	0.140997	-0.51666				-0.38538	-0.68535	1.147033	2.198145	0.157529	-0.38461	-0.17752	-1.17861	-0.5814	-0.27313	-0.6895
4.04867	-0.46182	-0.14906	1.210618	-0.23015	0.424858	-1.13666	-0.49006	-0.86737	-1.68619	0.198272	-0.52212				-0.36454	-0.57171	1.169844	2.0756	0.130682	-0.46771	-0.12694	-1.22357	-0.55067	-0.22035	-0.72907
4.05687	-0.47507	-0.17919	1.153834	-0.26461	0.430393	-1.08428	-0.49113	-0.88407	-1.73372	0.190768	-0.54782				-0.33288	-0.50728	1.115471	1.978201	0.099136	-0.53545	-0.0513	-1.20155	-0.55145	-0.07893	-0.78806
4.06507	-0.46553	-0.15854	1.080493	-0.3078	0.371531	-1.01472	-0.47143	-0.97198	-1.72929	0.148468	-0.58382				-0.29396	-0.54692	1.002238	1.928462	0.049949	-0.57145	0.037547	-1.16233	-0.57488	0.110272	-0.85622
4.07327	-0.44153	-0.08358	0.989577	-0.31755	0.265356	-0.9361	-0.42765	-1.12714	-1.67559	0.114987	-0.61295				-0.27003	-0.64527	0.923512	1.927068	-0.02985	-0.58241	0.13111	-1.15679	-0.59427	0.276287	-0.91312
4.08148	-0.42683	0.016326	0.923952	-0.28855	0.158316	-0.84945	-0.36819	-1.29032	-1.60752	0.119689	-0.62034				-0.27958	-0.70465	0.941604	1.943027	-0.13919	-0.59034	0.223843	-1.20051	-0.59923	0.390934	-0.94662
4.08968	-0.4404	0.106085	0.92727	-0.25676	0.0968	-0.7399	-0.29754	-1.39887	-1.55399	0.172722	-0.60511				-0.30095	-0.65864	1.040074	1.941501	-0.25024	-0.59976	0.311545	-1.26999	-0.59165	0.470285	-0.9578
4.09788	-0.47854	0.155292	0.976492	-0.2668	0.089019	-0.58979	-0.21247	-1.41869	-1.52758	0.271113	-0.57838				-0.30718	-0.51717	1.145574	1.923423	-0.33311	-0.61301	0.377898	-1.33809	-0.58507	0.533099	-0.96017
4.10609	-0.53132	0.155646	1.013495	-0.32081	0.108928	-0.38822	-0.10985	-1.36997	-1.52088	0.394587	-0.56384				-0.29207	-0.34302	1.204681	1.917271	-0.37525	-0.62931	0.407445	-1.4127	-0.58669	0.570506	-0.95941
4.11429	-0.57812	0.112036	0.980288	-0.39639	0.1194	-0.14191	0.004482	-1.30643	-1.5187	0.524038	-0.58275				-0.2661	-0.211	1.204268	1.957938	-0.39725	-0.64632	0.398674	-1.49821	-0.58939	0.561029	-0.95225
4.12249	-0.60139	0.031778	0.896625	-0.45808	0.110858	0.128576	0.115346	-1.28401	-1.52158	0.647347	-0.63321				-0.26948	-0.17358	1.163171	2.046958	-0.42095	-0.65236	0.362621	-1.5765	-0.59119	0.514569	-0.93425
4.13062	-0.5804	-0.05776	0.806573	-0.48199	0.100386	0.403875	0.210373	-1.32302	-1.53714	0.774668	-0.68761				-0.32664	-0.19963	1.127908	2.144778	-0.44079	-0.62399	0.321065	-1.60997	-0.60191	0.461507	-0.9081
4.13882	-0.50568	-0.10911	0.744527	-0.45684	0.09809	0.670833	0.28086	-1.4143	-1.56939	0.92817	-0.71495				-0.44052	-0.20398	1.124097	2.200215	-0.4369	-0.55208	0.285606	-1.57598	-0.64969	0.431793	-0.8833
4.14702	-0.40231	-0.08117	0.743864	-0.37717	0.102127	0.918553	0.326003	-1.51544	-1.60548	1.104394	-0.72461				-0.57266	-0.12132	1.162662	2.19591	-0.41516	-0.44701	0.264211	-1.49237	-0.74079	0.41506	-0.86352
4.15523	-0.30339	0.012293	0.815708	-0.27218	0.09658	1.139159	0.342039	-1.57944	-1.629	1.270338	-0.75103				-0.67041	0.013753	1.20779	2.16095	-0.41656	-0.34352	0.251438	-1.40038	-0.84427	0.383104	-0.85574
4.16343	-0.237	0.114144	0.961278	-0.18228	0.074894	1.309146	0.334465	-1.59724	-1.63972	1.389143	-0.81602				-0.70915	0.117867	1.188748	2.129578	-0.46236	-0.2739	0.238214	-1.3252	-0.91929	0.328611	-0.8721
4.17163	-0.19583	0.178768	1.131105	-0.1287	0.047064	1.409028	0.323774	-1.59009	-1.6525	1.450626	-0.89361				-0.71137	0.142519	1.064151	2.121257	-0.53364	-0.24813	0.216005	-1.252	-0.94574	0.264287	-0.91918
4.17983	-0.15967	0.224028	1.248901	-0.09214	0.019465	1.429774	0.333009	-1.59905	-1.67842	1.463589	-0.92725				-0.71656	0.106193	0.84191	2.12684	-0.58119	-0.25415	0.186771	-1.16854	-0.93544	0.216258	-0.98877
4.18804	-0.12405	0.309373	1.285918	-0.03411	-0.00445	1.387301	0.375965	-1.6364	-1.71074	1.447713	-0.89337				-0.70715	0.061772	0.62205	2.115013	-0.57287	-0.27071	0.164627	-1.08561	-0.9084	0.195146	-1.04653
4.19624	-0.10317	0.439943	1.267448	0.038618	-0.02442	1.307514	0.442068	-1.69905	-1.73073	1.426583	-0.8226				-0.62942	0.021031	0.510854	2.069431	-0.52152	-0.28438	0.157203	-1.03211	-0.8755	0.19461	-1.06236
4.20444	-0.12094	0.55653	1.249564	0.093336	-0.02872	1.208702	0.522531	-1.76873	-1.72364	1.40834	-0.76428				-0.46578	-0.03148	0.545896	2.003751	-0.46617	-0.29413	0.160406	-1.03064	-0.83359	0.205963	-1.02882
4.21265	-0.16743	0.584722	1.240908	0.105424	-0.00861	1.09657	0.620626	-1.80675	-1.69374	1.379061	-0.73346				-0.27082	-0.11247	0.680166	1.96555	-0.43618	-0.30989	0.146183	-1.06963	-0.78025	0.225664	-0.96776
4.22077	-0.19658	0.501147	1.235044	0.085862	0.019715	0.97986	0.748865	-1.78941	-1.65776	1.301452	-0.71653				-0.14539	-0.22242	0.82767	1.980799	-0.42007	-0.33504	0.102998	-1.12957	-0.71494	0.248077	-0.91773
4.22897	-0.17912	0.360514	1.24799	0.056783	0.023739	0.870879	0.909444	-1.7113	-1.62853	1.161419	-0.70851				-0.151	-0.32904	0.944934	2.038092	-0.40245	-0.36895	0.035236	-1.19701	-0.63486	0.24856	-0.90362
4.23717	-0.14621	0.226748	1.306302	0.0171	-0.02278	0.782214	1.068026	-1.60584	-1.61736	0.991212	-0.71672				-0.25925	-0.38714	1.011952	2.102808	-0.37979	-0.41435	-0.04182	-1.27307	-0.5589	0.220108	-0.9268
4.24538	-0.16047	0.140185	1.423619	-0.03079	-0.10301	0.716071	1.177498	-1.5139	-1.62429	0.852751	-0.74325				-0.38086	-0.35198	1.026962	2.144167	-0.35614	-0.468	-0.10859	-1.34405	-0.51495	0.187498	-0.9726
4.25358	-0.25071	0.092136	1.543436	-0.06912	-0.17506	0.65849	1.207141	-1.45473	-1.63945	0.777641	-0.76791				-0.46767	-0.23779	0.997024	2.163994	-0.34287	-0.52466	-0.15689	-1.39528	-0.52595	0.179805	-1.02705
4.26178	-0.38932	0.052534	1.605543	-0.06569	-0.19955	0.599795	1.164432	-1.42344	-1.64029	0.733499	-0.7689				-0.53131	-0.11667	0.919522	2.175185	-0.33577	-0.57252	-0.1755	-1.43049	-0.57923	0.195041	-1.07901
4.26999	-0.5159	0.004234	1.599494	-0.02352	-0.16776	0.535551	1.081482	-1.39814	-1.61282	0.673463	-0.74353				-0.59251	-0.05762	0.806565	2.180067	-0.33674	-0.60378	-0.17045	-1.44151	-0.63923	0.200022	-1.11364
4.27819	-0.59907	-0.04099	1.580284	0.021753	-0.09856	0.46946	0.987026	-1.36639	-1.56962	0.580208	-0.71368				-0.65337	-0.07789	0.690374	2.183077	-0.35715	-0.61541	-0.15069	-1.42212	-0.69542	0.166347	-1.11561
4.28639	-0.64381	-0.04312	1.590745	0.040323	-0.01833	0.409066	0.897861	-1.32397	-1.52304	0.483652	-0.69607				-0.67153	-0.13913	0.617	2.197073	-0.40362	-0.60713	-0.12736	-1.35839	-0.7565	0.093192	-1.07998
4.2946	-0.65438	0.005132	1.631065	0.037443	0.047441	0.356708	0.815347	-1.28355	-1.48502	0.41427	-0.68194				-0.62527	-0.21744	0.619903	2.233641	-0.46736	-0.58411	-0.11225	-1.25594	-0.82902	0.018718	-1.02569
4.3028	-0.63191	0.06948	1.667249	0.038319	0.08592	0.314452	0.7369	-1.26612	-1.45612	0.368202	-0.65781				-0.53833	-0.30614	0.71807	2.277046	-0.52313	-0.5515	-0.11198	-1.15957	-0.89117	-0.02636	-0.98051
4.31092	-0.58551	0.109644	1.646727	0.043222	0.084751	0.274729	0.65748	-1.25944	-1.4357	0.329374	-0.61208				-0.47655	-0.39401	0.884534	2.303701	-0.56203	-0.52124	-0.1333	-1.12127	-0.9104	-0.03435	-0.96203
4.31912	-0.55494	0.117564	1.557416	0.042422	0.054729	0.232282	0.571196	-1.23299	-1.42835	0.277808	-0.54747				-0.48829	-0.43972	1.043968	2.294126	-0.57511	-0.5068	-0.17025	-1.16174	-0.89242	-0.01285	-0.9623
4.32733	-0.55728	0.110879	1.400813	0.008991	0.027173	0.188557	0.471259	-1.17817	-1.43289	0.206565	-0.47993				-0.54886	-0.41668	1.139782	2.248626	-0.55535	-0.52028	-0.20854	-1.24249	-0.87574	0.021116	-0.96182
4.33553	-0.57198	0.090089	1.190342	-0.08539	0.027855	0.14745	0.367634	-1.15335	-1.4465	0.123642	-0.43217				-0.60855	-0.33535	1.161479	2.180719	-0.50652	-0.56741	-0.23252	-1.30768	-0.8968	0.05587	-0.95588
4.34373	-0.56059	0.049088	0.973561	-0.2366	0.06637	0.114219	0.278763	-1.22248	-1.46952	0.041449	-0.42663				-0.62083	-0.22553	1.147803	2.099756	-0.45817	-0.62374	-0.24553	-1.32566	-0.9444	0.076721	-0.94225
4.35194	-0.4975	-0.00391	0.784076	-0.41285	0.116946	0.085011	0.218214	-1.37459	-1.5087	-0.03038	-0.45738				-0.58851	-0.13445	1.128156	2.015585	-0.44442	-0.65655	-0.26248	-1.3023	-0.97712	0.080819	-0.91425
4.36014	-0.40101	-0.04308	0.653997	-0.55755	0.144806	0.054965	0.180893	-1.52318	-1.55983	-0.08922	-0.49969				-0.54597	-0.07457	1.114384	1.93873	-0.46679	-0.658	-0.28743	-1.27544	-0.96355	0.072551	-0.85513
4.36834	-0.30673	-0.06311	0.59976	-0.63264	0.129683	0.01759	0.148863	-1.59082	-1.60682	-0.13194	-0.52546				-0.52656	-0.02044	1.100997	1.89497	-0.49967	-0.64766	-0.30569	-1.28112	-0.90953	0.054883	-0.76175
4.37654	-0.26022	-0.08055	0.625575	-0.63487	0.077761	-0.02583	0.112615	-1.58117	-1.64315	-0.15926	-0.52674				-0.54267	0.071197	1.075585	1.891581	-0.51457	-0.65246	-0.2985	-1.32487	-0.8534	0.033209	-0.66015
4.38475	-0.28832	-0.09364	0.678347	-0.59693	0.017913	-0.06304	0.073274	-1.54647	-1.68052	-0.16737	-0.51461				-0.572	0.23428	1.0748	1.910269	-0.51194	-0.67882	-0.28025	-1.37404	-0.83491	0.00424	-0.58183
4.39295	-0.3732	-0.08221	0.682482	-0.56433	-0.0255	-0.08414	0.035759	-1.54195	-1.73272	-0.16845	-0.49931				-0.58643	0.465555	1.13282	1.923365	-0.50501	-0.71033	-0.27894	-1.39974	-0.87036	-0.03146	-0.54504
4.40115	-0.47218	-0.0207	0.630667	-0.55123	-0.0424	-0.09628	0.006958	-1.57103	-1.78058	-0.18858	-0.48527				-0.57319	0.713644	1.248997	1.911069	-0.49113	-0.72584	-0.30912	-1.40501	-0.95663	-0.07934	-0.54157
4.40928	-0.53901	0.068737	0.561014	-0.56133	-0.05221	-0.11948	-0.01387	-1.60559	-1.79563	-0.23797	-0.47711				-0.54355	0.913494	1.377143	1.888768	-0.45892	-0.7225	-0.3557	-1.40887	-1.0811	-0.15177	-0.55724
4.41748	-0.56233	0.138717	0.51571	-0.57595	-0.08301	-0.16652	-0.03142	-1.6407	-1.76708	-0.2957	-0.48771				-0.51596	1.047914	1.463794	1.878839	-0.40172	-0.70709	-0.38603	-1.42532	-1.21417	-0.24968	-0.58822
4.42568	-0.55372	0.163351	0.474789	-0.58083	-0.13482	-0.23367	-0.04757	-1.66367	-1.71607	-0.31058	-0.52493				-0.50085	1.143659	1.495852	1.900422	-0.33453	-0.70002	-0.3885	-1.42251	-1.30702	-0.35839	-0.63142
4.43389	-0.52446	0.154782	0.384614	-0.58244	-0.18171	-0.29126	-0.05801	-1.66333	-1.68067	-0.25853	-0.57936				-0.52175	1.229436	1.497503	1.944907	-0.26849	-0.72512	-0.37792	-1.35904	-1.31555	-0.44553	-0.68087
4.44209	-0.4771	0.156708	0.249351	-0.58525	-0.20412	-0.31165	-0.04961	-1.62975	-1.67562	-0.16653	-0.62912				-0.5997	1.329402	1.498645	1.974399	-0.20961	-0.77868	-0.37802	-1.21893	-1.22866	-0.48861	-0.71722
4.45029	-0.42217	0.189651	0.134101	-0.57598	-0.21487	-0.29344	-0.00776	-1.56944	-1.68914	-0.09805	-0.6559				-0.73261	1.430231	1.472435	1.968379	-0.16806	-0.82674	-0.39836	-1.05389	-1.09375	-0.491	-0.72715
4.45849	-0.38494	0.251442	0.107253	-0.54075	-0.23533	-0.25746	0.068002	-1.49783	-1.68498	-0.10279	-0.66218				-0.87257	1.499974	1.378079	1.923761	-0.14765	-0.82177	-0.42846	-0.95194	-0.96985	-0.4821	-0.71148
4.4667	-0.37159	0.317112	0.174853	-0.4999	-0.26956	-0.23537	0.151813	-1.41253	-1.63782	-0.17976	-0.66261				-0.95293	1.520377	1.235073	1.865907	-0.15085	-0.75628	-0.45275	-0.95354	-0.8896	-0.4883	-0.67617
4.4749	-0.3598	0.357906	0.293497	-0.48932	-0.29885	-0.24236	0.201065	-1.31561	-1.55421	-0.28845	-0.67418				-0.95525	1.499561	1.120135	1.843302	-0.16647	-0.6681	-0.45558	-1.02855	-0.85217	-0.50118	-0.62585
4.4831	-0.31467	0.375949	0.38145	-0.53054	-0.31061	-0.27141	0.192271	-1.21488	-1.47177	-0.3797	-0.70494				-0.92435	1.46865	1.101368	1.88862	-0.18272	-0.60641	-0.43311	-1.08841	-0.83891	-0.48828	-0.56707
4.49131	-0.24416	0.38583	0.383487	-0.60704	-0.31108	-0.30402	0.129551	-1.14333	-1.44855	-0.44056	-0.74414				-0.91102	1.442658	1.171578	1.976213	-0.19105	-0.5962	-0.40882	-1.07655	-0.84001	-0.41051	-0.5191
4.49943	-0.19254	0.392041	0.304237	-0.68181	-0.30008	-0.32734	0.037324	-1.14515	-1.5037	-0.49184	-0.77418				-0.88822	1.419493	1.263952	2.033086	-0.19019	-0.62388	-0.40464	-1.00754	-0.83782	-0.25704	-0.50479
4.50763	-0.18263	0.373963	0.199017	-0.73706	-0.27151	-0.34675	-0.05784	-1.23392	-1.60056	-0.54592	-0.78486				-0.81278	1.392555	1.311089	2.003231	-0.18172	-0.6744	-0.42793	-0.93329	-0.81909	-0.04264	-0.53818
4.51584	-0.20907	0.319194	0.138592	-0.77278	-0.22197	-0.369	-0.1364	-1.37423	-1.6702	-0.59295	-0.79166				-0.69837	1.372648	1.291786	1.877222	-0.16174	-0.72646	-0.46399	-0.87705	-0.7773	0.196368	-0.6009
4.52404	-0.24747	0.252954	0.127111	-0.7984	-0.16742	-0.39669	-0.18868	-1.47988	-1.6571	-0.60192	-0.81212				-0.6198	1.362131	1.239022	1.718794	-0.13915	-0.75733	-0.49165	-0.77563	-0.7131	0.420668	-0.65879
4.53224	-0.28448	0.213214	0.138098	-0.80904	-0.12997	-0.42886	-0.21567	-1.491	-1.55366	-0.57018	-0.85267				-0.65578	1.339819	1.188955	1.611061	-0.13579	-0.74885	-0.50748	-0.54168	-0.64555	0.603554	-0.68608
4.54044	-0.30901	0.217144	0.146014	-0.79077	-0.11845	-0.45976	-0.22425	-1.39825	-1.38309	-0.5397	-0.90489				-0.80223	1.284191	1.182007	1.59102	-0.16954	-0.70052	-0.52123	-0.13726	-0.59003	0.723999	-0.66852
4.54865	-0.30713	0.252133	0.145489	-0.74316	-0.14406	-0.48384	-0.22657	-1.27123	-1.18247	-0.54782	-0.94523				-0.98764	1.190723	1.237522	1.635803	-0.23807	-0.64151	-0.53867	0.384649	-0.56146	0.783015	-0.60931
4.55685	-0.28309	0.304709	0.145088	-0.67379	-0.20598	-0.4922	-0.22848	-1.19698	-0.97769	-0.58759	-0.95887				-1.13292	1.09742	1.361294	1.699834	-0.32132	-0.59915	-0.54275	0.901225	-0.57171	0.793917	-0.51707
4.56505	-0.2511	0.362821	0.134071	-0.61105	-0.29065	-0.48407	-0.23557	-1.20059	-0.80086	-0.6132	-0.94368				-1.19946	1.050879	1.526327	1.753878	-0.39143	-0.58004	-0.52402	1.295879	-0.62088	0.773237	-0.41063
4.57326	-0.24059	0.419386	0.117143	-0.57756	-0.37009	-0.46635	-0.25508	-1.23532	-0.68472	-0.5974	-0.91213				-1.19917	1.072254	1.675083	1.786347	-0.41953	-0.57004	-0.49077	1.507113	-0.68894	0.734104	-0.31064
4.58146	-0.25786	0.468602	0.083922	-0.57761	-0.42276	-0.44485	-0.29392	-1.23605	-0.64113	-0.55301	-0.88251				-1.14899	1.142998	1.746628	1.8124	-0.40073	-0.55988	-0.4631	1.565333	-0.74328	0.683199	-0.23261
4.58958	-0.27481	0.498971	0.033742	-0.59322	-0.45096	-0.42305	-0.35164	-1.18801	-0.65389	-0.51121	-0.86373				-1.0759	1.21599	1.681674	1.839731	-0.34905	-0.54766	-0.45507	1.55268	-0.76618	0.632431	-0.191
4.59778	-0.26948	0.510337	-0.00065	-0.59397	-0.4613	-0.40799	-0.41244	-1.10896	-0.68797	-0.4779	-0.8541				-0.99382	1.249315	1.499883	1.84745	-0.29374	-0.52233	-0.46315	1.56475	-0.75765	0.582952	-0.18292
4.60599	-0.24506	0.506286	0.005458	-0.58075	-0.46453	-0.41052	-0.46882	-1.03018	-0.72082	-0.44402	-0.84158				-0.91422	1.20315	1.296766	1.817381	-0.25996	-0.46825	-0.47744	1.629442	-0.73762	0.527465	-0.19845
4.61419	-0.22467	0.496958	0.052459	-0.5645	-0.46485	-0.43357	-0.51385	-0.98505	-0.74435	-0.41669	-0.81938				-0.86064	1.089949	1.17554	1.743247	-0.23458	-0.37285	-0.48592	1.696298	-0.73051	0.461651	-0.21895
4.62239	-0.21446	0.488554	0.089461	-0.55428	-0.46918	-0.46682	-0.5384	-1.00064	-0.76119	-0.41032	-0.78686				-0.85225	0.966671	1.189312	1.648808	-0.18523	-0.25713	-0.49296	1.68789	-0.75144	0.392176	-0.22792
4.6306	-0.20217	0.493814	0.071547	-0.5386	-0.49044	-0.48987	-0.52867	-1.09652	-0.76902	-0.4362	-0.74848				-0.88228	0.88105	1.316028	1.569932	-0.08429	-0.16619	-0.50023	1.553366	-0.7947	0.349187	-0.23119
4.6388	-0.17786	0.522879	0.018435	-0.49661	-0.53515	-0.49065	-0.47823	-1.22985	-0.75797	-0.48161	-0.71212				-0.90318	0.843081	1.502181	1.529233	0.059239	-0.13856	-0.51225	1.325733	-0.83664	0.354423	-0.25211
4.647	-0.15326	0.548091	-0.00875	-0.4379	-0.59665	-0.47443	-0.40443	-1.33474	-0.72282	-0.52513	-0.69035				-0.88665	0.809315	1.667626	1.517794	0.220008	-0.17464	-0.53054	1.083365	-0.8708	0.392863	-0.3139
4.65521	-0.15289	0.546303	0.025055	-0.39967	-0.66045	-0.452	-0.32915	-1.37854	-0.64925	-0.54864	-0.69557				-0.83592	0.7416	1.764514	1.503229	0.381785	-0.2407	-0.53926	0.888749	-0.90296	0.413289	-0.41134
4.66341	-0.17774	0.519052	0.097022	-0.41406	-0.71416	-0.43542	-0.26992	-1.36438	-0.53912	-0.55572	-0.71496				-0.78588	0.642809	1.790063	1.488409	0.531224	-0.29871	-0.52649	0.749126	-0.94925	0.384137	-0.51452
4.67161	-0.20755	0.493166	0.185562	-0.46428	-0.73885	-0.42301	-0.22967	-1.31461	-0.4219	-0.5751	-0.72508				-0.75928	0.556389	1.759244	1.493621	0.662053	-0.31747	-0.48318	0.616538	-1.00793	0.328781	-0.58745
4.67973	-0.20927	0.502693	0.276956	-0.50612	-0.7309	-0.41152	-0.20505	-1.22949	-0.34053	-0.61802	-0.71067				-0.74089	0.505617	1.704128	1.522165	0.759596	-0.29689	-0.43005	0.459392	-1.05611	0.295223	-0.61224
4.68794	-0.17539	0.548747	0.35886	-0.50149	-0.70362	-0.39715	-0.19383	-1.0971	-0.32263	-0.67711	-0.67988				-0.72202	0.467813	1.644622	1.54703	0.8155	-0.26866	-0.40607	0.275764	-1.07686	0.295707	-0.59791
4.69614	-0.12467	0.59234	0.400044	-0.4469	-0.67284	-0.38258	-0.19214	-0.92298	-0.34643	-0.73489	-0.65591				-0.71863	0.413461	1.560558	1.532853	0.848951	-0.26437	-0.43533	0.101741	-1.06438	0.282111	-0.55947
4.70434	-0.0817	0.579807	0.387175	-0.36976	-0.65261	-0.38198	-0.19849	-0.76641	-0.37041	-0.78578	-0.65638				-0.75341	0.333466	1.432232	1.482298	0.886147	-0.2906	-0.50528	-0.02397	-1.03648	0.207199	-0.51647
4.71255	-0.06437	0.492043	0.357564	-0.3094	-0.6435	-0.40111	-0.21522	-0.68912	-0.37138	-0.84626	-0.68695				-0.80027	0.254637	1.287631	1.425862	0.941305	-0.32477	-0.57563	-0.09627	-1.00558	0.078433	-0.49193
4.72075	-0.06608	0.351411	0.367393	-0.29821	-0.63948	-0.42956	-0.24814	-0.69405	-0.37091	-0.92503	-0.73074				-0.8071	0.209601	1.172293	1.391298	1.002042	-0.3474	-0.62378	-0.11938	-0.96811	-0.04456	-0.50504
4.72895	-0.0838	0.2114	0.446274	-0.34166	-0.63512	-0.43775	-0.29485	-0.72949	-0.40835	-1.0074	-0.76837				-0.73506	0.210647	1.110077	1.375447	1.058501	-0.36746	-0.65239	-0.12552	-0.9077	-0.11124	-0.5493
4.73716	-0.11361	0.136903	0.542019	-0.42693	-0.64112	-0.40261	-0.33999	-0.74252	-0.49345	-1.06432	-0.78212				-0.58045	0.243623	1.110256	1.369542	1.115536	-0.40659	-0.67456	-0.16475	-0.79867	-0.131	-0.59938
4.74536	-0.14815	0.155283	0.590378	-0.52085	-0.68087	-0.32642	-0.36524	-0.72201	-0.60108	-1.09469	-0.76754				-0.41567	0.28597	1.152137	1.37021	1.189942	-0.47176	-0.68202	-0.27817	-0.64236	-0.14435	-0.63855
4.75356	-0.17189	0.240767	0.603756	-0.57452	-0.74921	-0.23011	-0.36975	-0.68944	-0.6885	-1.12875	-0.74642				-0.33214	0.332861	1.22569	1.374928	1.291956	-0.53687	-0.65742	-0.45321	-0.47385	-0.17684	-0.65543
4.76176	-0.16444	0.340597	0.636222	-0.5662	-0.81421	-0.14879	-0.3764	-0.66879	-0.73867	-1.18661	-0.74173				-0.37549	0.385973	1.316358	1.378144	1.41174	-0.57381	-0.60418	-0.63428	-0.33796	-0.21266	-0.64477
4.76989	-0.14581	0.430079	0.744466	-0.49846	-0.82945	-0.10428	-0.4092	-0.65781	-0.76825	-1.25955	-0.75905				-0.51328	0.445492	1.386196	1.3672	1.534096	-0.58468	-0.5539	-0.75593	-0.26062	-0.20998	-0.59261
4.77809	-0.14048	0.506934	0.892412	-0.4101	-0.78241	-0.09154	-0.47191	-0.64435	-0.79565	-1.32111	-0.78243				-0.65855	0.497641	1.391397	1.343687	1.645237	-0.59439	-0.54085	-0.78993	-0.23063	-0.13763	-0.49352
4.78629	-0.15315	0.556193	0.980011	-0.34077	-0.7098	-0.0839	-0.53579	-0.63764	-0.81373	-1.35932	-0.79556				-0.75011	0.531627	1.313854	1.313264	1.746071	-0.62382	-0.56543	-0.76844	-0.21924	0.014338	-0.37621
4.7945	-0.17766	0.547331	0.943055	-0.29894	-0.65852	-0.06492	-0.56656	-0.63201	-0.80941	-1.38197	-0.79798				-0.77733	0.562208	1.20918	1.277496	1.829362	-0.66601	-0.60633	-0.7343	-0.20199	0.220226	-0.29245
4.8027	-0.20622	0.461934	0.835937	-0.27843	-0.64875	-0.03842	-0.56338	-0.62114	-0.79963	-1.40393	-0.79268				-0.77569	0.608915	1.141612	1.243979	1.879758	-0.7091	-0.63904	-0.70506	-0.17784	0.442473	-0.27022
4.8109	-0.24731	0.347558	0.785557	-0.26533	-0.66546	-0.02221	-0.55298	-0.61578	-0.81409	-1.41931	-0.7777				-0.76833	0.684927	1.144735	1.217538	1.881904	-0.74669	-0.65994	-0.68505	-0.16093	0.644014	-0.28546
4.81911	-0.30352	0.269486	0.84481	-0.27153	-0.69257	-0.02582	-0.56522	-0.65647	-0.86177	-1.41067	-0.74642				-0.76365	0.772429	1.201269	1.20779	1.832106	-0.77664	-0.67459	-0.69851	-0.16967	0.798101	-0.29386
4.82731	-0.34625	0.254802	0.989593	-0.31581	-0.72328	-0.03186	-0.60138	-0.79218	-0.90616	-1.37801	-0.70494				-0.76954	0.848505	1.252436	1.208458	1.768639	-0.7909	-0.67586	-0.77965	-0.20883	0.901381	-0.26959
4.83551	-0.33061	0.28391	1.161935	-0.39679	-0.74753	-0.018	-0.63459	-1.01751	-0.90527	-1.33706	-0.66634				-0.7902	0.909502	1.278013	1.216895	1.734158	-0.77876	-0.65454	-0.92604	-0.26204	0.963482	-0.21767
4.84371	-0.25163	0.321223	1.326407	-0.47722	-0.74803	0.0231	-0.6471	-1.28201	-0.86686	-1.30639	-0.64234				-0.81598	0.948123	1.301595	1.239418	1.736909	-0.74601	-0.61021	-1.09832	-0.3105	0.987163	-0.17147
4.85192	-0.16539	0.360074	1.476684	-0.51017	-0.71091	0.074385	-0.64451	-1.49767	-0.83328	-1.28964	-0.62879				-0.81427	0.958365	1.363935	1.276118	1.733141	-0.71414	-0.55302	-1.23558	-0.34338	0.972653	-0.15747
4.86004	-0.14203	0.394364	1.594001	-0.49855	-0.64622	0.106344	-0.64765	-1.58009	-0.84231	-1.2795	-0.61049				-0.77344	0.930556	1.462721	1.322591	1.673008	-0.71201	-0.49718	-1.30173	-0.37303	0.927735	-0.17296
4.86824	-0.22053	0.403399	1.639783	-0.47649	-0.58112	0.093907	-0.6662	-1.51468	-0.888	-1.26852	-0.57979				-0.71554	0.866145	1.551106	1.353551	1.566466	-0.74007	-0.4524	-1.31311	-0.41849	0.867941	-0.18831
4.87644	-0.37171	0.366077	1.594804	-0.46912	-0.54951	0.025811	-0.69065	-1.37168	-0.94058	-1.24036	-0.53974				-0.67853	0.768611	1.582503	1.353922	1.466464	-0.77647	-0.4285	-1.2918	-0.49416	0.814304	-0.17987
4.88465	-0.5268	0.288212	1.494182	-0.46928	-0.55904	-0.0812	-0.70573	-1.27297	-0.97723	-1.18645	-0.5078				-0.68078	0.636917	1.523465	1.322806	1.417575	-0.80079	-0.42519	-1.27201	-0.59154	0.781884	-0.14415
4.89285	-0.61878	0.210882	1.396646	-0.45712	-0.5839	-0.18673	-0.70107	-1.28532	-0.9946	-1.09755	-0.50361				-0.69044	0.477597	1.405926	1.272951	1.406942	-0.8122	-0.4274	-1.27494	-0.66511	0.76285	-0.09471
4.90105	-0.63532	0.160993	1.356003	-0.42893	-0.59515	-0.26134	-0.68417	-1.3976	-1.00986	-0.97776	-0.52748				-0.67378	0.313449	1.298995	1.224375	1.38539	-0.82837	-0.4202	-1.30206	-0.66417	0.739699	-0.04738
4.90926	-0.61746	0.146231	1.398575	-0.39963	-0.58166	-0.30275	-0.66425	-1.53786	-1.02745	-0.8531	-0.5627				-0.6164	0.181938	1.250772	1.197127	1.32719	-0.84703	-0.39434	-1.33323	-0.55414	0.695311	-0.00706
4.91746	-0.60417	0.153349	1.487439	-0.39417	-0.56353	-0.32591	-0.64612	-1.63417	-1.04216	-0.74726	-0.58825				-0.55451	0.104458	1.270721	1.210792	1.244204	-0.85291	-0.3552	-1.3446	-0.35246	0.632353	0.018428
4.92566	-0.61508	0.158445	1.565949	-0.41378	-0.55684	-0.32983	-0.62994	-1.66624	-1.05626	-0.67825	-0.60139				-0.54611	0.077172	1.348649	1.2643	1.160714	-0.82464	-0.30856	-1.34386	-0.11234	0.565513	0.022304
4.93387	-0.63013	0.153098	1.573201	-0.45501	-0.56055	-0.30107	-0.61217	-1.63371	-1.07857	-0.64593	-0.60884				-0.61706	0.082119	1.458676	1.33535	1.077686	-0.76523	-0.24751	-1.35292	0.108353	0.507607	0.00528
4.94207	-0.62416	0.153115	1.514982	-0.49797	-0.56384	-0.24029	-0.59079	-1.54037	-1.12199	-0.63859	-0.61852				-0.74951	0.113196	1.57089	1.388131	0.987123	-0.69771	-0.16243	-1.38891	0.273425	0.473782	-0.01878
4.95027	-0.59057	0.166952	1.454387	-0.51434	-0.56738	-0.17215	-0.56216	-1.40955	-1.18538	-0.64578	-0.63497				-0.86855	0.170613	1.664145	1.388692	0.897349	-0.63284	-0.04968	-1.42896	0.379257	0.456801	-0.03692
4.95839	-0.53474	0.173612	1.440361	-0.50866	-0.5912	-0.13031	-0.52402	-1.29428	-1.25084	-0.66672	-0.65308				-0.90242	0.238227	1.685402	1.33022	0.830114	-0.5698	0.076572	-1.43697	0.426751	0.4348	-0.05547
4.9666	-0.48647	0.159749	1.462133	-0.50898	-0.63284	-0.11779	-0.47205	-1.23036	-1.28978	-0.70573	-0.67555				-0.82673	0.298012	1.600898	1.244713	0.798349	-0.49651	0.188584	-1.41449	0.422232	0.383901	-0.07641
4.9748	-0.48203	0.137957	1.4561	-0.54512	-0.67451	-0.10461	-0.40343	-1.19673	-1.28793	-0.75255	-0.70302				-0.68464	0.335504	1.440474	1.194232	0.785093	-0.40589	0.266434	-1.38996	0.387575	0.305328	-0.09031
4.983	-0.54944	0.137344	1.409747	-0.60727	-0.70662	-0.06805	-0.29843	-1.15477	-1.25274	-0.7903	-0.73157				-0.5692	0.348647	1.269249	1.222693	0.773769	-0.29015	0.311269	-1.38666	0.351442	0.230775	-0.09298
4.99121	-0.6631	0.164551	1.361573	-0.65855	-0.72924	-0.02277	-0.13058	-1.0958	-1.20797	-0.80987	-0.75493				-0.53746	0.33878	1.176393	1.332859	0.770869	-0.13883	0.330978	-1.40496	0.331763	0.17938	-0.09092
4.99941	-0.76018	0.175434	1.361079	-0.6836	-0.7439	-0.00461	0.104504	-1.06655	-1.18205	-0.82877	-0.76297				-0.59332	0.293781	1.200003	1.502132	0.803083	0.055418	0.328181	-1.44079	0.310965	0.149503	-0.0988
5.00761	-0.79391	0.130641	1.431195	-0.6887	-0.73122	-0.02917	0.385918	-1.10196	-1.18934	-0.8791	-0.75249				-0.69231	0.228416	1.29151	1.706712	0.874575	0.282735	0.311095	-1.47848	0.25793	0.111278	-0.11524
5.01582	-0.76081	0.043076	1.531107	-0.68815	-0.67121	-0.08115	0.672068	-1.18236	-1.22797	-0.96374	-0.72907				-0.7886	0.171512	1.345334	1.947414	0.957347	0.503639	0.285749	-1.49237	0.155064	0.045909	-0.13369
5.02402	-0.70363	-0.03545	1.602997	-0.68034	-0.57059	-0.12685	0.932154	-1.24403	-1.26676	-1.05312	-0.71566				-0.85799	0.15479	1.304113	2.208916	1.023594	0.671701	0.262187	-1.46674	0.024803	-0.03887	-0.15326
5.03222	-0.65688	-0.07345	1.598106	-0.68018	-0.46906	-0.14665	1.150007	-1.22375	-1.27365	-1.11782	-0.7377				-0.8975	0.177267	1.206648	2.451878	1.055686	0.758	0.236595	-1.42221	-0.1006	-0.12191	-0.1833
5.04043	-0.61781	-0.07567	1.523839	-0.71491	-0.40398	-0.14548	1.317908	-1.1341	-1.24466	-1.16391	-0.80376				-0.9231	0.201781	1.115113	2.619634	1.064721	0.775672	0.20853	-1.42435	-0.20318	-0.17437	-0.23564
5.04855	-0.57179	-0.0394	1.454125	-0.79157	-0.3854	-0.14254	1.43176	-1.01962	-1.20123	-1.20689	-0.88895				-0.94731	0.200863	1.071567	2.681009	1.06654	0.765916	0.185095	-1.52085	-0.27422	-0.1665	-0.30494
5.05675	-0.52635	0.030992	1.45772	-0.89193	-0.4056	-0.15263	1.489038	-0.92683	-1.17667	-1.24954	-0.95144				-0.97865	0.180782	1.041849	2.659097	1.063256	0.760218	0.175643	-1.67323	-0.31688	-0.08169	-0.37599
5.06495	-0.50608	0.119007	1.519009	-0.97899	-0.45228	-0.17316	1.512934	-0.89186	-1.17863	-1.27975	-0.97139				-1.00279	0.187197	0.977143	2.604533	1.05708	0.754788	0.186801	-1.76935	-0.33922	0.06438	-0.42781
5.07316	-0.5268	0.197787	1.548049	-1.03135	-0.51621	-0.1986	1.532072	-0.91932	-1.19527	-1.28465	-0.9579				-1.00257	0.251351	0.892473	2.573202	1.052559	0.721153	0.195501	-1.72494	-0.3635	0.236697	-0.44438
5.08136	-0.59059	0.263941	1.490926	-1.06249	-0.58376	-0.21703	1.561109	-0.99189	-1.20751	-1.274	-0.93693				-0.97487	0.35307	0.832802	2.580394	1.061245	0.658008	0.180792	-1.58343	-0.40867	0.406144	-0.41983
5.08956	-0.66651	0.338014	1.394316	-1.10042	-0.63609	-0.22664	1.591157	-1.08909	-1.20981	-1.25609	-0.9186				-0.93834	0.44027	0.812481	2.587816	1.080834	0.598201	0.138355	-1.44177	-0.47916	0.559336	-0.35698
5.09777	-0.70181	0.411535	1.35895	-1.13633	-0.65407	-0.23558	1.609472	-1.21524	-1.21874	-1.22535	-0.89525				-0.91785	0.463518	0.792435	2.544964	1.097851	0.57061	0.095923	-1.37377	-0.56695	0.699566	-0.26213
5.10597	-0.65298	0.442543	1.408127	-1.13644	-0.6328	-0.24789	1.620063	-1.36617	-1.24652	-1.15575	-0.85567				-0.91281	0.421565	0.733425	2.431755	1.096273	0.565312	0.091675	-1.36741	-0.65392	0.818899	-0.13651
5.11417	-0.51547	0.404547	1.473058	-1.08159	-0.59244	-0.27009	1.633368	-1.50011	-1.30001	-1.02543	-0.79281				-0.93451	0.354098	0.635382	2.277236	1.067784	0.548197	0.137099	-1.36656	-0.72289	0.906316	0.010338
5.12238	-0.34534	0.325585	1.500262	-0.97911	-0.55468	-0.30423	1.649679	-1.56938	-1.36171	-0.84442	-0.7145				-0.99821	0.30239	0.553587	2.130675	1.038442	0.508974	0.212147	-1.34791	-0.75026	0.949442	0.157632
5.13058	-0.2182	0.259035	1.481591	-0.87517	-0.54153	-0.3533	1.648983	-1.56076	-1.39881	-0.644	-0.63429				-1.10222	0.286154	0.540297	2.037944	1.037127	0.464941	0.278177	-1.32596	-0.70624	0.945076	0.278318
5.1387	-0.19029	0.219787	1.456563	-0.8202	-0.55805	-0.40792	1.615308	-1.51721	-1.39887	-0.46426	-0.57589				-1.2226	0.296002	0.585108	2.018241	1.070869	0.432599	0.315019	-1.32784	-0.58569	0.904375	0.363051
5.1469	-0.24213	0.176851	1.437182	-0.83043	-0.59534	-0.45075	1.54776	-1.4811	-1.37915	-0.3341	-0.55815				-1.30806	0.311852	0.631254	2.071163	1.101995	0.409366	0.321439	-1.36302	-0.4174	0.846476	0.424485
5.15511	-0.29447	0.108884	1.393962	-0.87343	-0.64751	-0.46861	1.457348	-1.44374	-1.3759	-0.26292	-0.56999				-1.34144	0.319149	0.616367	2.17102	1.079463	0.382364	0.309281	-1.42264	-0.25959	0.800147	0.458856
5.16331	-0.27194	0.038118	1.310452	-0.89355	-0.70087	-0.46247	1.356805	-1.35084	-1.39938	-0.25377	-0.58604				-1.32928	0.330493	0.558857	2.269376	0.98944	0.350468	0.288731	-1.47149	-0.16111	0.766419	0.454994
5.17151	-0.13915	-0.01194	1.219212	-0.85728	-0.73863	-0.4519	1.252821	-1.18107	-1.42214	-0.29806	-0.59117				-1.2824	0.357513	0.541508	2.314125	0.871917	0.314599	0.272208	-1.45103	-0.13718	0.723005	0.406059
5.17971	0.076504	-0.03553	1.203011	-0.75057	-0.74474	-0.45255	1.162926	-0.99162	-1.4068	-0.37004	-0.60002				-1.20588	0.404118	0.628681	2.286621	0.783941	0.272395	0.274247	-1.33787	-0.16075	0.653766	0.332365
5.18792	0.312227	-0.0471	1.281937	-0.59728	-0.72247	-0.45903	1.095927	-0.85224	-1.35556	-0.43431	-0.6278				-1.1136	0.452321	0.818507	2.228866	0.736915	0.233477	0.301094	-1.16366	-0.18795	0.571644	0.266181
5.19612	0.516487	-0.06342	1.405565	-0.44482	-0.70032	-0.45486	1.046223	-0.79008	-1.30489	-0.47427	-0.66699				-1.03411	0.475605	1.026687	2.193675	0.707367	0.214591	0.351134	-0.99955	-0.19831	0.516268	0.213945
5.20433	0.672286	-0.07518	1.491975	-0.32821	-0.69673	-0.4349	0.994507	-0.77271	-1.28724	-0.49594	-0.69798				-0.96789	0.468309	1.174508	2.188265	0.671471	0.224179	0.405595	-0.89696	-0.19252	0.500934	0.161826
5.21253	0.796698	-0.06404	1.473937	-0.27357	-0.69913	-0.41012	0.928199	-0.77138	-1.3002	-0.5183	-0.70653				-0.88683	0.444116	1.208684	2.183762	0.635597	0.247091	0.44067	-0.86855	-0.17976	0.507235	0.096555
5.22073	0.897939	-0.01302	1.397063	-0.2737	-0.66533	-0.39692	0.86093	-0.79591	-1.30911	-0.54805	-0.70378				-0.75876	0.439784	1.127041	2.151507	0.625198	0.264195	0.440655	-0.89722	-0.17169	0.507385	0.030106
5.22885	0.960488	0.064194	1.360617	-0.30173	-0.57578	-0.40387	0.820036	-0.86859	-1.2915	-0.5701	-0.71258				-0.59191	0.466391	0.980225	2.102775	0.641106	0.26368	0.410944	-0.95797	-0.1817	0.481436	-0.02478
5.23705	0.963594	0.128482	1.420255	-0.33454	-0.46292	-0.42221	0.823913	-0.9842	-1.25863	-0.57841	-0.743				-0.44275	0.493135	0.856316	2.050949	0.669033	0.24738	0.373523	-1.04482	-0.21095	0.42895	-0.07267
5.24526	0.923011	0.148918	1.537572	-0.36624	-0.38397	-0.44359	0.867928	-1.07976	-1.23895	-0.58023	-0.78806				-0.36066	0.493622	0.857292	1.999363	0.690649	0.219931	0.339002	-1.14091	-0.24698	0.360063	-0.11902
5.25346	0.873064	0.117469	1.63412	-0.38932	-0.36621	-0.46676	0.917342	-1.0999	-1.25645	-0.58508	-0.84104				-0.35607	0.468814	0.990984	1.941856	0.700493	0.174417	0.301878	-1.22745	-0.27607	0.302008	-0.15302
5.26166	0.828707	0.064687	1.661324	-0.37421	-0.38361	-0.48838	0.930536	-1.03795	-1.31035	-0.58925	-0.90452				-0.39696	0.447741	1.153953	1.868984	0.696428	0.115319	0.251776	-1.2879	-0.28866	0.285275	-0.15589
5.26987	0.77876	0.019306	1.628982	-0.3171	-0.39592	-0.507	0.880766	-0.93816	-1.39037	-0.59619	-0.97537				-0.45252	0.44117	1.234647	1.795056	0.676163	0.062976	0.191576	-1.32337	-0.3017	0.318702	-0.12947
5.27807	0.712389	0.0016	1.591795	-0.25265	-0.38326	-0.51935	0.777269	-0.865	-1.47113	-0.62343	-1.03972				-0.51646	0.435736	1.204653	1.738191	0.660426	0.050287	0.146081	-1.34158	-0.33992	0.378496	-0.10047
5.28627	0.646894	0.026	1.572923	-0.22633	-0.35503	-0.5257	0.657742	-0.82868	-1.52247	-0.67753	-1.07275				-0.58404	0.414526	1.132971	1.715479	0.666865	0.081999	0.13486	-1.33863	-0.41179	0.439368	-0.08955
5.29448	0.602415	0.077712	1.552138	-0.23946	-0.32028	-0.52669	0.554106	-0.80329	-1.52359	-0.74932	-1.05783				-0.63813	0.388176	1.103968	1.731519	0.694359	0.134258	0.150738	-1.32487	-0.50933	0.527053	-0.09185
5.30268	0.586406	0.120579	1.501573	-0.25105	-0.27886	-0.52448	0.477995	-0.75625	-1.4853	-0.82005	-0.99689				-0.6542	0.393417	1.163639	1.764203	0.724845	0.173623	0.174889	-1.30756	-0.60133	0.689735	-0.08734
5.31088	0.584034	0.113228	1.429899	-0.23561	-0.23789	-0.52234	0.420544	-0.68113	-1.45367	-0.88032	-0.90824				-0.64289	0.437462	1.29019	1.786883	0.747051	0.172472	0.193011	-1.30564	-0.65961	0.938906	-0.06841
5.31901	0.577229	0.05636	1.36827	-0.20911	-0.20801	-0.51935	0.373598	-0.59037	-1.45608	-0.94474	-0.82576				-0.62311	0.495319	1.433443	1.790693	0.786514	0.134006	0.210533	-1.33615	-0.66278	1.207718	-0.03791
5.32721	0.562632	-0.01019	1.319711	-0.20117	-0.19441	-0.5167	0.336334	-0.4882	-1.48396	-1.02342	-0.7773				-0.60401	0.52836	1.540608	1.791064	0.871909	0.071639	0.241391	-1.38073	-0.61908	1.399036	-0.00248
5.33541	0.526877	-0.05267	1.268189	-0.20167	-0.18605	-0.51287	0.307854	-0.38082	-1.51459	-1.10837	-0.77385				-0.57868	0.511335	1.589148	1.797431	1.00099	0.002796	0.289751	-1.43244	-0.55753	1.456771	0.030526
5.34361	0.472723	-0.06873	1.201822	-0.19539	-0.16726	-0.50747	0.283386	-0.27112	-1.52534	-1.17633	-0.79549				-0.53408	0.441527	1.586892	1.80807	1.127761	-0.06202	0.358322	-1.49872	-0.50738	1.39601	0.047258
5.35182	0.412536	-0.08443	1.178507	-0.18457	-0.13389	-0.51042	0.254284	-0.17843	-1.50814	-1.21434	-0.81012				-0.48855	0.341754	1.549358	1.829488	1.209603	-0.12428	0.44149	-1.58539	-0.498	1.289514	0.029462
5.36002	0.361139	-0.12333	1.276382	-0.17975	-0.08953	-0.52727	0.215475	-0.12185	-1.45714	-1.2218	-0.80239				-0.46235	0.251948	1.496567	1.881552	1.250857	-0.18284	0.529469	-1.66344	-0.53556	1.203528	-0.01714
5.36822	0.331549	-0.18879	1.483288	-0.18654	-0.04963	-0.55776	0.162439	-0.10657	-1.36984	-1.20795	-0.77326				-0.46144	0.195421	1.424142	1.978828	1.294031	-0.2441	0.608149	-1.67451	-0.60705	1.167271	-0.07145
5.37643	0.319032	-0.26091	1.696428	-0.18032	-0.02235	-0.59231	0.101677	-0.1234	-1.25628	-1.19485	-0.74034				-0.47981	0.172118	1.338509	2.081208	1.372966	-0.30984	0.676177	-1.58618	-0.68263	1.164199	-0.10924
5.38463	0.303578	-0.32375	1.795707	-0.15067	-0.01898	-0.61752	0.046682	-0.16822	-1.15032	-1.20059	-0.71295				-0.51867	0.148439	1.256839	2.130131	1.476308	-0.37911	0.729276	-1.42809	-0.73077	1.157696	-0.12473
5.39283	0.253583	-0.3486	1.776327	-0.1082	-0.05343	-0.61783	0.009245	-0.23962	-1.08943	-1.22736	-0.69079				-0.59575	0.106404	1.191073	2.106717	1.565912	-0.44815	0.757629	-1.27422	-0.73336	1.123446	-0.1303
5.40104	0.166733	-0.31245	1.718926	-0.07823	-0.12525	-0.58209	-0.00894	-0.29966	-1.08183	-1.2583	-0.6772				-0.69589	0.06492	1.169308	2.047486	1.604778	-0.5084	0.754319	-1.15654	-0.70729	1.046526	-0.13461
5.40916	0.08297	-0.24661	1.675659	-0.08739	-0.21964	-0.51631	-0.02391	-0.31042	-1.11022	-1.28409	-0.67463				-0.78008	0.041975	1.211037	1.989904	1.598225	-0.54554	0.725418	-1.06589	-0.69412	0.936677	-0.14287
5.41736	0.042961	-0.20118	1.639799	-0.12426	-0.31284	-0.44068	-0.04653	-0.26326	-1.14088	-1.3134	-0.67705				-0.81421	0.047821	1.317624	1.937922	1.573091	-0.55195	0.697178	-0.97553	-0.71475	0.82469	-0.1567
5.42556	0.05162	-0.1968	1.588415	-0.1471	-0.39383	-0.37698	-0.07952	-0.2072	-1.15194	-1.36393	-0.66754				-0.79241	0.073574	1.438424	1.880752	1.54156	-0.54515	0.684989	-0.87384	-0.76124	0.746072	-0.18516
5.43377	0.058264	-0.19907	1.545041	-0.10893	-0.4645	-0.31894	-0.1112	-0.2145	-1.13617	-1.43635	-0.64432				-0.73968	0.112278	1.491394	1.803839	1.502686	-0.54165	0.691921	-0.76022	-0.80506	0.720802	-0.23348
5.44197	0.015517	-0.16225	1.538837	-0.03331	-0.52029	-0.24328	-0.13639	-0.28831	-1.10157	-1.51427	-0.62799				-0.68258	0.158204	1.456502	1.735107	1.446483	-0.55047	0.697813	-0.62278	-0.81148	0.723633	-0.28812
5.45017	-0.0686	-0.08793	1.568032	-0.01273	-0.54532	-0.12904	-0.16605	-0.3784	-1.06031	-1.59601	-0.64696				-0.63451	0.195219	1.380652	1.718712	1.383663	-0.56828	0.689713	-0.46388	-0.76414	0.708828	-0.33073
5.45838	-0.14956	-0.01847	1.604525	-0.1091	-0.53146	0.01408	-0.20746	-0.42627	-1.01668	-1.67498	-0.71308				-0.59692	0.215475	1.345471	1.759783	1.339281	-0.59083	0.669527	-0.30947	-0.6762	0.64904	-0.35503
5.46658	-0.20345	-0.0072	1.620001	-0.28355	-0.4942	0.151035	-0.2614	-0.44236	-0.98415	-1.73717	-0.80236				-0.57833	0.212749	1.379166	1.834279	1.329372	-0.62284	0.643649	-0.20152	-0.59619	0.564578	-0.37512
5.47478	-0.2431	-0.06134	1.615079	-0.42365	-0.45719	0.257146	-0.3192	-0.49385	-0.97085	-1.767	-0.87134				-0.58075	0.196889	1.433966	1.9065	1.34619	-0.67289	0.622689	-0.14325	-0.57457	0.500646	-0.40989
5.48298	-0.28223	-0.15487	1.606561	-0.4522	-0.43354	0.318911	-0.37336	-0.60562	-0.97579	-1.75901	-0.90063				-0.60149	0.184306	1.441327	1.961632	1.355778	-0.74311	0.596903	-0.08617	-0.63753	0.479933	-0.46646
5.49119	-0.32469	-0.24662	1.624615	-0.38602	-0.41478	0.334408	-0.4125	-0.74234	-0.99086	-1.727	-0.91135				-0.63448	0.183251	1.364953	2.003586	1.343567	-0.8165	0.5648	-0.00802	-0.75556	0.500895	-0.53557
5.49939	-0.34143	-0.27995	1.687772	-0.30484	-0.39328	0.301234	-0.42181	-0.84761	-1.00846	-1.68256	-0.92759				-0.66515	0.213373	1.238774	2.043791	1.317417	-0.87292	0.527911	0.065467	-0.86387	0.541178	-0.60264
5.50751	-0.29506	-0.22863	1.793439	-0.25827	-0.3762	0.227885	-0.39391	-0.91023	-1.03377	-1.62481	-0.94265				-0.69196	0.287678	1.127729	2.079905	1.299597	-0.89158	0.487016	0.079181	-0.93074	0.57837	-0.6584
5.51572	-0.17444	-0.11946	1.900819	-0.2359	-0.37105	0.140928	-0.33462	-0.95439	-1.06702	-1.54036	-0.93748				-0.70745	0.391599	1.069916	2.090668	1.290968	-0.85997	0.445189	0.00887	-0.96056	0.589292	-0.69356
5.52392	-0.01709	-0.02121	1.95788	-0.21798	-0.38252	0.061838	-0.26439	-1.00097	-1.10982	-1.42387	-0.90361				-0.71911	0.477358	1.04705	2.068796	1.257752	-0.79588	0.401435	-0.11431	-0.9759	0.569591	-0.70609
5.53212	0.095544	0.014858	1.967586	-0.19284	-0.40243	0.006005	-0.1923	-1.05885	-1.16161	-1.28606	-0.85811				-0.73782	0.521807	1.00122	2.015841	1.173352	-0.73068	0.360494	-0.2298	-0.98183	0.535838	-0.70469
5.54032	0.116268	-0.01405	1.954594	-0.16157	-0.42863	-0.03146	-0.10696	-1.11387	-1.22093	-1.13027	-0.82801				-0.77302	0.543017	0.899256	1.95374	1.053106	-0.68341	0.321085	-0.27831	-0.9652	0.509568	-0.7077
5.54853	0.060213	-0.09243	1.951261	-0.11923	-0.46707	-0.05605	0.01262	-1.16145	-1.28372	-0.97587	-0.84137				-0.83795	0.578931	0.774797	1.903317	0.94992	-0.656	0.286492	-0.25278	-0.92993	0.505385	-0.72616
5.55673	-0.01456	-0.20346	1.954378	-0.06958	-0.51889	-0.06643	0.168993	-1.18916	-1.32526	-0.84996	-0.90447				-0.92465	0.656723	0.716832	1.872101	0.900299	-0.64211	0.257166	-0.18768	-0.89605	0.530034	-0.75666
5.56493	-0.05613	-0.31838	1.947434	-0.02589	-0.58157	-0.0662	0.334766	-1.17255	-1.31718	-0.77471	-0.98738				-1.01255	0.762251	0.760556	1.849166	0.889132	-0.64794	0.236565	-0.14091	-0.88472	0.602737	-0.79349
5.57314	-0.05298	-0.38435	1.926017	0.008355	-0.63522	-0.06335	0.469985	-1.09465	-1.25577	-0.73144	-1.03754				-1.0607	0.85057	0.875839	1.813802	0.86591	-0.67616	0.228731	-0.15488	-0.90525	0.740921	-0.82379
5.58134	-0.00979	-0.36397	1.876377	0.026414	-0.66387	-0.07057	0.549339	-0.9735	-1.18533	-0.66874	-0.99284				-1.04233	0.870973	0.987778	1.755098	0.799365	-0.70766	0.234531	-0.20289	-0.95353	0.92999	-0.84231
5.58954	0.035601	-0.2805	1.807573	0.029603	-0.66309	-0.0963	0.584193	-0.85279	-1.17127	-0.53899	-0.83456				-0.97552	0.806966	1.029975	1.669575	0.706386	-0.70754	0.244537	-0.2236	-1.02029	1.121341	-0.85104
5.59767	0.038594	-0.20971	1.712892	0.002268	-0.63682	-0.14662	0.598213	-0.76944	-1.24399	-0.33956	-0.60521				-0.89742	0.685532	1.004522	1.568671	0.628994	-0.66545	0.237482	-0.17814	-1.0909	1.242825	-0.85487
5.60587	-0.01762	-0.2112	1.578216	-0.07433	-0.5935	-0.21315	0.598317	-0.74158	-1.37317	-0.13013	-0.37529				-0.84724	0.565503	0.945168	1.469127	0.590931	-0.61715	0.212992	-0.10208	-1.14841	1.253008	-0.85915
5.61407	-0.10358	-0.27416	1.41487	-0.18349	-0.53425	-0.28137	0.570702	-0.73335	-1.48847	0.015728	-0.2038				-0.83427	0.509564	0.888896	1.399059	0.581854	-0.59583	0.186607	-0.06507	-1.17065	1.16018	-0.86017
5.62228	-0.15381	-0.35575	1.257696	-0.28566	-0.4699	-0.33258	0.500192	-0.70447	-1.53896	0.066189	-0.11174				-0.84954	0.517723	0.846286	1.392898	0.575563	-0.60939	0.177953	-0.1182	-1.15338	1.019342	-0.8627
5.63048	-0.13643	-0.4063	1.193259	-0.33897	-0.42123	-0.35868	0.398668	-0.66472	-1.51994	0.04886	-0.08549				-0.8813	0.547202	0.823309	1.431792	0.553216	-0.63161	0.182303	-0.24612	-1.11469	0.894982	-0.87582
5.63868	-0.08256	-0.39681	1.270719	-0.32973	-0.41573	-0.36655	0.296587	-0.66074	-1.46657	0.01119	-0.09447				-0.91423	0.546918	0.832568	1.467939	0.507824	-0.63292	0.166712	-0.3774	-1.07573	0.82022	-0.90775
5.64688	-0.04777	-0.32215	1.452582	-0.26778	-0.46044	-0.35985	0.218036	-0.72017	-1.40596	-0.03729	-0.11947				-0.94048	0.501533	0.878357	1.460492	0.451685	-0.60621	0.112	-0.45782	-1.03787	0.79093	-0.95836
5.65509	-0.05843	-0.20324	1.642607	-0.17421	-0.52083	-0.3293	0.1699	-0.80895	-1.33259	-0.11286	-0.16059				-0.94444	0.441215	0.962022	1.401038	0.388929	-0.57363	0.038372	-0.47008	-0.98266	0.768923	-1.00705
5.66329	-0.11505	-0.10078	1.774058	-0.07839	-0.54787	-0.26152	0.143324	-0.87674	-1.24815	-0.21557	-0.22337				-0.91396	0.3917	1.033126	1.314773	0.320394	-0.57096	-0.01041	-0.43798	-0.90648	0.72307	-1.03456
5.67149	-0.21105	-0.07676	1.840486	0.002643	-0.51809	-0.16875	0.132977	-0.89421	-1.16558	-0.30515	-0.29985				-0.83342	0.360596	1.045784	1.225794	0.256543	-0.60759	-0.01105	-0.38772	-0.82008	0.649962	-1.03425
5.6797	-0.31803	-0.15109	1.844714	0.064556	-0.45094	-0.09243	0.134754	-0.88464	-1.11863	-0.33644	-0.36066				-0.69864	0.333567	1.02549	1.153681	0.212999	-0.66388	0.016782	-0.34304	-0.74694	0.571559	-1.01674
5.68782	-0.38304	-0.28539	1.777684	0.116443	-0.3803	-0.06269	0.138361	-0.9016	-1.12536	-0.31688	-0.39144				-0.51698	0.299058	1.034268	1.105723	0.222041	-0.70278	0.035707	-0.32155	-0.70423	0.514771	-0.99618
5.69602	-0.35821	-0.41496	1.62855	0.153573	-0.3286	-0.07548	0.132541	-0.9512	-1.16138	-0.28885	-0.39794				-0.31405	0.262145	1.100556	1.093328	0.298558	-0.71276	0.016761	-0.31229	-0.70105	0.499411	-0.98351
5.70422	-0.26266	-0.50003	1.446101	0.159063	-0.288	-0.09836	0.109911	-1.0127	-1.18361	-0.29719	-0.39387				-0.1415	0.241568	1.190152	1.12465	0.41648	-0.71176	-0.03932	-0.30923	-0.7346	0.531942	-0.97681
5.71243	-0.16404	-0.5232	1.291874	0.120372	-0.22921	-0.10763	0.076209	-1.06925	-1.16695	-0.34203	-0.39006				-0.0377	0.252655	1.23766	1.190414	0.52091	-0.72085	-0.10441	-0.30625	-0.77302	0.587991	-0.96307
5.72063	-0.11709	-0.49445	1.19224	0.04275	-0.14603	-0.11446	0.039656	-1.11546	-1.13562	-0.39267	-0.39647				-0.01825	0.277527	1.21577	1.275582	0.561461	-0.74495	-0.15635	-0.30945	-0.79294	0.627228	-0.9439
5.72883	-0.13014	-0.43223	1.12464	-0.05068	-0.06439	-0.14732	0.002575	-1.14396	-1.12423	-0.42808	-0.424				-0.04602	0.278766	1.172348	1.348693	0.529418	-0.75902	-0.19188	-0.34022	-0.78429	0.622294	-0.93148
5.73704	-0.17052	-0.35895	1.05761	-0.15003	-0.02676	-0.22015	-0.03717	-1.15673	-1.14152	-0.43468	-0.46789				-0.06302	0.232078	1.164919	1.383859	0.453939	-0.74661	-0.22677	-0.39738	-0.75872	0.58688	-0.93113
5.74524	-0.21635	-0.28702	1.014359	-0.24176	-0.04912	-0.30797	-0.08184	-1.1728	-1.16586	-0.41586	-0.51302				-0.03673	0.15412	1.198269	1.37915	0.383612	-0.70626	-0.27092	-0.45889	-0.74456	0.551871	-0.92541
5.75344	-0.25213	-0.21813	1.027691	-0.30774	-0.11658	-0.36968	-0.12706	-1.20685	-1.16503	-0.38975	-0.53734				0.034586	0.08412	1.249327	1.366087	0.350013	-0.65136	-0.30694	-0.50195	-0.75872	0.538812	-0.89982
5.76165	-0.26894	-0.15511	1.117125	-0.32737	-0.20051	-0.38954	-0.17015	-1.24814	-1.14017	-0.38973	-0.52941				0.110841	0.045554	1.288718	1.378301	0.356239	-0.60107	-0.31303	-0.53121	-0.80009	0.555015	-0.87218
5.76985	-0.27332	-0.10096	1.280178	-0.29112	-0.27086	-0.38274	-0.21225	-1.25506	-1.11288	-0.43257	-0.50995				0.164056	0.035082	1.308819	1.423405	0.375886	-0.56122	-0.29334	-0.56721	-0.84848	0.583827	-0.87441
5.77797	-0.28183	-0.07132	1.493133	-0.20588	-0.32093	-0.37959	-0.26236	-1.21624	-1.10135	-0.49837	-0.50824				0.188189	0.027666	1.307787	1.48365	0.378445	-0.53021	-0.28523	-0.62811	-0.88381	0.610894	-0.92849
5.78617	-0.32559	-0.0693	1.724403	-0.06724	-0.34564	-0.39461	-0.32005	-1.16906	-1.09861	-0.55451	-0.54071				0.197391	0.026051	1.311763	1.526074	0.353005	-0.49243	-0.32034	-0.71201	-0.88291	0.640497	-1.01504
5.79438	-0.40547	-0.08649	1.894817	0.105549	-0.33935	-0.41798	-0.37585	-1.15509	-1.08237	-0.58249	-0.59365				0.225775	0.043764	1.357703	1.52802	0.314117	-0.44095	-0.39821	-0.78054	-0.83935	0.68833	-1.09555
5.80258	-0.5014	-0.1109	1.949841	0.277361	-0.31298	-0.43073	-0.41958	-1.18574	-1.04499	-0.60563	-0.64085				0.303157	0.077172	1.445743	1.476648	0.287988	-0.38506	-0.48721	-0.80233	-0.78417	0.767641	-1.14595
5.81078	-0.58925	-0.12525	1.886824	0.385834	-0.28917	-0.428	-0.44308	-1.23682	-1.00635	-0.66558	-0.67261				0.44139	0.098208	1.553761	1.396535	0.273019	-0.34507	-0.5521	-0.78044	-0.74685	0.873255	-1.16534
5.81899	-0.64963	-0.10826	1.762347	0.367456	-0.2851	-0.41327	-0.44896	-1.28969	-1.00344	-0.778	-0.6993				0.600631	0.067673	1.62697	1.338904	0.244047	-0.33332	-0.58472	-0.75377	-0.72928	0.993013	-1.16503
5.82719	-0.67409	-0.04804	1.680905	0.220841	-0.29396	-0.37954	-0.44149	-1.34578	-1.05647	-0.91293	-0.73734				0.714832	-0.01074	1.62016	1.324521	0.182229	-0.34272	-0.60092	-0.75147	-0.71522	1.099836	-1.14951
5.83539	-0.66048	0.02023	1.694144	0.018295	-0.30542	-0.32309	-0.43105	-1.41328	-1.15861	-1.02787	-0.78655				0.742314	-0.10088	1.527606	1.333667	0.103152	-0.35827	-0.62511	-0.77375	-0.70757	1.168958	-1.1268
5.8436	-0.62046	0.065222	1.763272	-0.1284	-0.32172	-0.25553	-0.4232	-1.48219	-1.27253	-1.09112	-0.83846				0.688647	-0.15498	1.367045	1.320925	0.06253	-0.36558	-0.65778	-0.81178	-0.72945	1.20026	-1.10991
5.8518	-0.57056	0.092559	1.802589	-0.14513	-0.35504	-0.19992	-0.41999	-1.50954	-1.36997	-1.10328	-0.88184				0.614039	-0.16076	1.199219	1.277017	0.105306	-0.36215	-0.69738	-0.85954	-0.79463	1.207025	-1.10615
5.86	-0.53291	0.125338	1.769553	-0.04381	-0.40632	-0.16582	-0.42338	-1.46364	-1.44589	-1.10157	-0.91092				0.582814	-0.15059	1.086853	1.231064	0.248447	-0.34931	-0.73537	-0.91915	-0.88407	1.205169	-1.12005
5.86812	-0.52559	0.181359	1.695456	0.096418	-0.45791	-0.14651	-0.42839	-1.32859	-1.4958	-1.12033	-0.91146				0.61943	-0.14925	1.079066	1.201844	0.475135	-0.32895	-0.76187	-0.95352	-0.94657	1.192489	-1.14425
5.87633	-0.54896	0.23688	1.628473	0.18427	-0.49071	-0.13211	-0.43933	-1.14581	-1.51806	-1.16436	-0.86845				0.686618	-0.13944	1.167326	1.183618	0.742487	-0.30059	-0.77829	-0.90361	-0.95327	1.156402	-1.16982
5.88453	-0.59657	0.256772	1.586857	0.1759	-0.49823	-0.11571	-0.45875	-1.0086	-1.50369	-1.21707	-0.78971				0.748528	-0.06648	1.279596	1.156608	1.01097	-0.26103	-0.778	-0.73312	-0.90524	1.097882	-1.18878
5.89273	-0.64922	0.233753	1.52296	0.085525	-0.49032	-0.10879	-0.48416	-0.96977	-1.45753	-1.25475	-0.70161				0.808859	0.093059	1.335923	1.125673	1.235881	-0.21099	-0.76333	-0.45894	-0.81982	1.051566	-1.19171
5.90094	-0.68909	0.180452	1.38458	-0.03814	-0.4763	-0.12677	-0.5085	-1.00178	-1.40983	-1.2772	-0.63205				0.896436	0.283814	1.312588	1.099348	1.384061	-0.15701	-0.7373	-0.16015	-0.71261	1.05756	-1.16199
5.90914	-0.70839	0.10707	1.187349	-0.15014	-0.46321	-0.17361	-0.52209	-1.02281	-1.3925	-1.29892	-0.59257				1.023425	0.413085	1.258889	1.0776	1.444586	-0.11273	-0.71197	0.091002	-0.5942	1.118341	-1.09154
5.91734	-0.72271	0.013424	1.019512	-0.22222	-0.46049	-0.24022	-0.52588	-0.98433	-1.42125	-1.33406	-0.58201				1.152185	0.422199	1.215536	1.05144	1.443185	-0.08403	-0.69115	0.248002	-0.49044	1.199502	-1.00093
5.92555	-0.7489	-0.07517	0.970043	-0.24361	-0.46944	-0.30633	-0.5291	-0.89856	-1.47941	-1.37829	-0.59074				1.236187	0.336183	1.188996	1.004209	1.430888	-0.0643	-0.66698	0.309739	-0.41997	1.255067	-0.92594
5.93375	-0.77462	-0.13132	1.05707	-0.2275	-0.47984	-0.36162	-0.54548	-0.81285	-1.53684	-1.4086	-0.60351				1.256801	0.21776	1.148188	0.933398	1.443917	-0.05298	-0.63621	0.312902	-0.38474	1.270558	-0.89614
5.94195	-0.78112	-0.14265	1.222191	-0.18891	-0.46675	-0.40084	-0.5742	-0.77302	-1.56355	-1.40753	-0.61478				1.239503	0.119115	1.063725	0.851289	1.48041	-0.05497	-0.59658	0.286669	-0.36523	1.263394	-0.90786
5.95015	-0.74893	-0.12223	1.35233	-0.14347	-0.42644	-0.42955	-0.60087	-0.79915	-1.55491	-1.36858	-0.62602				1.231575	0.059367	0.967443	0.780463	1.498343	-0.07396	-0.55953	0.236899	-0.3361	1.258414	-0.9302
5.95836	-0.68692	-0.10829	1.397341	-0.09678	-0.38238	-0.45628	-0.61463	-0.89592	-1.54157	-1.31206	-0.64546				1.255155	0.047638	0.929359	0.735359	1.461631	-0.10806	-0.53598	0.148982	-0.31294	1.268022	-0.92908
5.96648	-0.60647	-0.13338	1.380306	-0.06293	-0.36207	-0.49064	-0.62837	-1.03348	-1.55269	-1.27198	-0.68215				1.320753	0.072189	0.981243	0.710238	1.391937	-0.14118	-0.53936	0.019952	-0.32945	1.272166	-0.88824
5.97468	-0.50638	-0.19278	1.344106	-0.07136	-0.38317	-0.54024	-0.66599	-1.16008	-1.58519	-1.26938	-0.72581				1.398609	0.084258	1.064936	0.683517	1.358757	-0.15315	-0.56947	-0.12395	-0.40304	1.242733	-0.81646
5.98289	-0.40498	-0.24256	1.335372	-0.13548	-0.43892	-0.59678	-0.73077	-1.23403	-1.59961	-1.30085	-0.75981				1.439386	0.047078	1.113462	0.644706	1.420276	-0.13432	-0.61319	-0.24202	-0.50978	1.161297	-0.73706
5.99109	-0.32672	-0.24215	1.383268	-0.24296	-0.5108	-0.63839	-0.80461	-1.2448	-1.5623	-1.34684	-0.7698				1.419753	-0.02584	1.101327	0.617003	1.565969	-0.09972	-0.65454	-0.30275	-0.60859	1.044709	-0.67709
5.99929	-0.28916	-0.17998	1.512359	-0.3343	-0.57583	-0.65029	-0.85646	-1.20772	-1.48487	-1.38804	-0.75619				1.352193	-0.06767	1.060973	0.618908	1.730803	-0.07653	-0.68571	-0.31917	-0.67919	0.931546	-0.64726
6.00749	-0.27365	-0.08845	1.708109	-0.34603	-0.61395	-0.64126	-0.86923	-1.14525	-1.4148	-1.40633	-0.73131				1.274055	-0.03397	1.055126	0.658759	1.84222	-0.0772	-0.70627	-0.32523	-0.7282	0.839711	-0.63809
6.0157	-0.24113	-0.01661	1.915462	-0.2621	-0.62559	-0.63685	-0.8403	-1.08587	-1.38771	-1.39468	-0.71113				1.203078	0.045793	1.077538	0.724934	1.886851	-0.09594	-0.70443	-0.3497	-0.77581	0.767981	-0.64666
6.0239	-0.18066	0.02074	2.055138	-0.11711	-0.62458	-0.6579	-0.77249	-1.04707	-1.38564	-1.36161	-0.70939				1.147393	0.122126	1.087816	0.790582	1.902894	-0.11355	-0.67776	-0.39023	-0.81847	0.702128	-0.67242
6.0321	-0.11676	0.031804	2.056404	0.025846	-0.62917	-0.70609	-0.67819	-1.04347	-1.37513	-1.33226	-0.7182				1.109513	0.151725	1.059405	0.843182	1.927893	-0.11984	-0.63911	-0.42818	-0.8456	0.63836	-0.71111
6.04031	-0.08703	0.033981	1.932204	0.132749	-0.64033	-0.76802	-0.57903	-1.07084	-1.34435	-1.34011	-0.723				1.103356	0.126715	1.009998	0.87519	1.969354	-0.12203	-0.6123	-0.45953	-0.86687	0.587063	-0.74436
6.04851	-0.09557	0.030137	1.753011	0.192986	-0.6504	-0.82662	-0.50079	-1.09042	-1.31884	-1.39837	-0.71252				1.15408	0.058504	0.967126	0.893985	2.010076	-0.13134	-0.62093	-0.51042	-0.90577	0.558787	-0.74881
6.05663	-0.12261	0.001893	1.60704	0.209293	-0.66093	-0.8597	-0.45664	-1.08634	-1.32762	-1.49615	-0.68544				1.260027	-0.03451	0.914445	0.898463	2.046653	-0.14397	-0.66897	-0.60991	-0.96652	0.559669	-0.71466
6.06483	-0.14957	-0.05551	1.544778	0.198621	-0.6833	-0.8559	-0.44058	-1.05838	-1.36463	-1.59303	-0.64999				1.386283	-0.12395	0.83444	0.878456	2.081212	-0.14855	-0.73661	-0.73299	-1.02686	0.578173	-0.65077
6.07304	-0.17515	-0.13675	1.554299	0.166788	-0.71384	-0.82277	-0.45068	-1.02656	-1.39926	-1.65054	-0.62267				1.4819	-0.18833	0.7434	0.817253	2.11231	-0.15428	-0.7963	-0.82282	-1.06521	0.5912	-0.58307
6.08124	-0.20374	-0.21345	1.586949	0.118899	-0.73134	-0.77699	-0.49046	-1.01258	-1.39945	-1.65278	-0.62577				1.525699	-0.22067	0.699469	0.703887	2.142312	-0.17426	-0.83067	-0.84107	-1.06813	0.571167	-0.52915
6.08944	-0.22677	-0.25869	1.596161	0.059586	-0.72853	-0.73979	-0.55312	-1.00865	-1.36751	-1.60531	-0.66621				1.523016	-0.24072	0.724619	0.56117	2.176601	-0.20975	-0.83467	-0.81528	-1.04546	0.510483	-0.48908
6.09765	-0.24022	-0.25949	1.571457	-0.00082	-0.72569	-0.71987	-0.61245	-0.9724	-1.32223	-1.53402	-0.72667				1.509224	-0.26495	0.767037	0.430444	2.236465	-0.23589	-0.80628	-0.82951	-1.00856	0.433446	-0.45532
6.10585	-0.23392	-0.23199	1.527373	-0.06619	-0.75719	-0.7146	-0.6376	-0.8396	-1.28302	-1.45127	-0.77189				1.515697	-0.29319	0.756209	0.355617	2.325748	-0.23496	-0.7526	-0.92051	-0.9617	0.374012	-0.42606
6.11405	-0.213	-0.21932	1.502684	-0.13763	-0.83195	-0.71185	-0.62312	-0.58599	-1.27239	-1.36643	-0.78078				1.525767	-0.32868	0.673011	0.364409	2.408947	-0.22076	-0.69153	-1.05627	-0.92208	0.350305	-0.40845
6.12226	-0.18627	-0.24533	1.507468	-0.19966	-0.91969	-0.70228	-0.58976	-0.24827	-1.29257	-1.28762	-0.7631				1.508818	-0.36489	0.582535	0.433396	2.436434	-0.22556	-0.63596	-1.16645	-0.91001	0.350631	-0.40616
6.13046	-0.16011	-0.29729	1.515291	-0.23878	-0.98118	-0.6937	-0.56421	0.079971	-1.31952	-1.22055	-0.74344				1.446366	-0.38214	0.556779	0.499382	2.395506	-0.27214	-0.59193	-1.20354	-0.92767	0.353403	-0.41771
6.13866	-0.13716	-0.32037	1.49645	-0.25741	-0.99007	-0.6994	-0.55392	0.299691	-1.31678	-1.16536	-0.73889				1.356952	-0.37499	0.611524	0.505493	2.324632	-0.33667	-0.55237	-1.17883	-0.94907	0.342448	-0.43226
6.14678	-0.11332	-0.26775	1.433741	-0.28554	-0.95517	-0.72778	-0.55389	0.39972	-1.26925	-1.10629	-0.73562				1.272431	-0.37292	0.716804	0.455812	2.265074	-0.38966	-0.51241	-1.13706	-0.95209	0.31678	-0.44497
6.15499	-0.10496	-0.16013	1.36864	-0.32882	-0.90145	-0.76365	-0.5654	0.454778	-1.20555	-1.04447	-0.71435				1.200214	-0.40025	0.84253	0.402189	2.235427	-0.42264	-0.48306	-1.13528	-0.94636	0.286556	-0.45961
6.16319	-0.12381	-0.06315	1.344368	-0.35524	-0.85698	-0.77713	-0.58957	0.55415	-1.17391	-0.99689	-0.67479				1.129654	-0.43835	0.955679	0.385431	2.216506	-0.44955	-0.46971	-1.20173	-0.95409	0.262162	-0.47365
6.17139	-0.16351	-0.0297	1.37759	-0.32473	-0.8452	-0.75656	-0.62035	0.70957	-1.20128	-0.98562	-0.63618				1.031838	-0.43428	1.02893	0.398428	2.174348	-0.47742	-0.46553	-1.32137	-0.9882	0.263163	-0.47968
6.1796	-0.20438	-0.05753	1.441827	-0.23702	-0.86213	-0.72113	-0.64628	0.862575	-1.24946	-1.0238	-0.62314				0.925914	-0.34959	1.078956	0.403253	2.103382	-0.4928	-0.45199	-1.43573	-1.02724	0.289798	-0.4715
6.1878	-0.22178	-0.10774	1.467132	-0.15067	-0.88705	-0.70323	-0.66402	0.947473	-1.25877	-1.10032	-0.63465				0.860756	-0.2297	1.122941	0.392977	2.036695	-0.49	-0.42562	-1.48554	-1.05285	0.324963	-0.46597
6.196	-0.2126	-0.1349	1.417277	-0.11226	-0.89482	-0.713	-0.67577	0.951113	-1.2059	-1.18963	-0.6535				0.872078	-0.1582	1.173531	0.386297	2.005271	-0.48253	-0.39667	-1.46811	-1.08082	0.342128	-0.48452
6.20421	-0.1873	-0.12551	1.302213	-0.12809	-0.87561	-0.73255	-0.68696	0.911721	-1.1087	-1.2694	-0.65299				0.949674	-0.18018	1.244484	0.403847	1.991168	-0.49167	-0.38068	-1.42138	-1.13663	0.314446	-0.53093
6.21241	-0.17078	-0.10146	1.194555	-0.16985	-0.83801	-0.73927	-0.69672	0.855126	-0.99368	-1.31671	-0.61815				1.036834	-0.25396	1.313331	0.439557	1.953631	-0.52052	-0.38344	-1.37925	-1.21648	0.244848	-0.58272
6.22061	-0.18535	-0.08287	1.17755	-0.214	-0.79337	-0.73092	-0.69065	0.783735	-0.86843	-1.31465	-0.5594				1.084039	-0.2953	1.35286	0.476183	1.874981	-0.55148	-0.40508	-1.33495	-1.2834	0.169759	-0.59698
6.22881	-0.23294	-0.08469	1.277786	-0.25987	-0.75021	-0.72635	-0.6619	0.676413	-0.72743	-1.27113	-0.50052				1.08237	-0.25982	1.330406	0.500149	1.788043	-0.56594	-0.44732	-1.24884	-1.30846	0.138188	-0.55077
6.23694	-0.30916	-0.09314	1.459093	-0.2817	-0.71121	-0.73861	-0.60862	0.535868	-0.56834	-1.21544	-0.46013				1.065522	-0.15822	1.245433	0.495242	1.745666	-0.55648	-0.50034	-1.10549	-1.28966	0.165445	-0.45498
6.24514	-0.39256	-0.07942	1.636157	-0.25469	-0.69073	-0.76596	-0.54005	0.386203	-0.41662	-1.16943	-0.43563				1.06515	-0.0467	1.145547	0.455334	1.747954	-0.5312	-0.55228	-0.94334	-1.24409	0.220363	-0.34316
6.25334	-0.46035	-0.01828	1.760618	-0.19324	-0.70952	-0.79589	-0.46678	0.223489	-0.30173	-1.14032	-0.41703				1.068195	0.0226	1.07326	0.382569	1.759284	-0.50387	-0.57789	-0.84414	-1.18106	0.260424	-0.25585
6.26155	-0.49921	0.081901	1.831428	-0.14472	-0.76108	-0.81843	-0.40145	0.041737	-0.24156	-1.11732	-0.39936				1.0398	0.048418	1.049609	0.311025	1.749348	-0.49157	-0.56845	-0.85585	-1.10214	0.268627	-0.2112
6.26975	-0.5089	0.157572	1.850932	-0.15124	-0.8154	-0.8309	-0.35486	-0.15619	-0.24173	-1.08979	-0.39191				0.96297	0.068903	1.06927	0.280782	1.730206	-0.5128	-0.53149	-0.96224	-1.02982	0.272516	-0.21254
6.27795	-0.48603	0.15321	1.824685	-0.1991	-0.8444	-0.83679	-0.32363	-0.32004	-0.28201	-1.03988	-0.41323				0.86141	0.121162	1.138268	0.282992	1.723425	-0.57412	-0.47474	-1.08205	-1.00346	0.299746	-0.2514
6.28616	-0.43785	0.056827	1.778549	-0.24689	-0.84417	-0.84791	-0.30212	-0.3854	-0.33284	-0.95315	-0.4678				0.784749	0.180507	1.250937	0.277978	1.72668	-0.66267	-0.40442	-1.14116	-1.04941	0.347938	-0.30999
6.29436	-0.39152	-0.0792	1.759137	-0.27287	-0.83609	-0.86852	-0.28587	-0.33906	-0.37425	-0.82984	-0.54319				0.761417	0.18493	1.354153	0.233724	1.730995	-0.75071	-0.32546	-1.12576	-1.14289	0.396732	-0.36234
6.30256	-0.37321	-0.17949	1.796618	-0.29512	-0.85527	-0.8907	-0.27534	-0.24489	-0.41161	-0.6899	-0.62277				0.761699	0.096005	1.377033	0.17187	1.72297	-0.81178	-0.26813	-1.07623	-1.22586	0.433414	-0.39163
6.31077	-0.39763	-0.20308	1.891576	-0.32506	-0.91189	-0.88403	-0.26465	-0.21323	-0.47246	-0.57475	-0.69187				0.735154	-0.06777	1.280696	0.144011	1.709699	-0.82655	-0.25649	-1.05859	-1.25386	0.456781	-0.39774
6.31897	-0.44962	-0.16279	2.00607	-0.34976	-0.98578	-0.82231	-0.23493	-0.29508	-0.57032	-0.51136	-0.74039				0.690204	-0.22351	1.119103	0.164324	1.709166	-0.80255	-0.28978	-1.08723	-1.20891	0.452552	-0.38722
6.32709	-0.50574	-0.10423	2.094208	-0.34981	-1.04553	-0.71449	-0.16669	-0.46036	-0.6953	-0.49249	-0.76419				0.674923	-0.30746	0.982178	0.190591	1.724612	-0.7707	-0.34153	-1.13117	-1.11022	0.4077	-0.36596
6.33529	-0.5527	-0.0543	2.118866	-0.32298	-1.05974	-0.60267	-0.05364	-0.63031	-0.80703	-0.49281	-0.7718				0.736586	-0.32233	0.923801	0.172991	1.747414	-0.75525	-0.37424	-1.15587	-0.99028	0.325761	-0.33604
6.34349	-0.5852	-0.01896	2.063764	-0.28885	-1.02731	-0.53863	0.084687	-0.73872	-0.86956	-0.48833	-0.77184				0.858162	-0.32008	0.939389	0.116201	1.753726	-0.76464	-0.37462	-1.13954	-0.88664	0.238325	-0.31039
6.3517	-0.61609	-0.00059	1.973295	-0.25814	-0.97626	-0.53627	0.218345	-0.79001	-0.87534	-0.47354	-0.77981				0.971428	-0.34286	1.021307	0.0573	1.730234	-0.78353	-0.34633	-1.1038	-0.83146	0.178426	-0.31461
6.3599	-0.65047	0.0000276	1.911728	-0.2421	-0.93899	-0.57458	0.323766	-0.82774	-0.84163	-0.44351	-0.8029				1.019422	-0.38854	1.164588	0.022901	1.687032	-0.78931	-0.30196	-1.08813	-0.83803	0.165778	-0.36511
6.3681	-0.69408	-0.00917	1.928115	-0.2345	-0.92309	-0.61724	0.391677	-0.88422	-0.79938	-0.40075	-0.82938				1.001695	-0.40734	1.332855	0.009912	1.663227	-0.77619	-0.24579	-1.10689	-0.89734	0.210748	-0.45036
6.37631	-0.74519	-0.00724	2.006594	-0.21624	-0.91177	-0.63866	0.433262	-0.94383	-0.76598	-0.36087	-0.84085				0.970074	-0.35323	1.479988	0.007396	1.697815	-0.75673	-0.18629	-1.1171	-0.97877	0.301237	-0.5341
6.38451	-0.78464	0.013174	2.083623	-0.1835	-0.89414	-0.63933	0.464296	-0.96846	-0.74223	-0.34727	-0.83111				0.949178	-0.25798	1.539397	0.012279	1.806915	-0.75275	-0.14192	-1.08007	-1.05733	0.409909	-0.59507
6.39271	-0.7982	0.048664	2.123834	-0.15403	-0.86238	-0.63515	0.489613	-0.93782	-0.72048	-0.38128	-0.81889				0.920918	-0.20034	1.478956	0.015635	1.983293	-0.77011	-0.13203	-1.02523	-1.10442	0.491044	-0.63226
6.40092	-0.78398	0.080294	2.098174	-0.1759	-0.82063	-0.6475	0.496936	-0.87401	-0.7076	-0.44857	-0.82598				0.864725	-0.23526	1.342142	0.00691	2.201387	-0.79601	-0.15607	-1.01811	-1.09392	0.508549	-0.66026
6.40912	-0.77267	0.096558	1.99658	-0.26021	-0.77785	-0.68665	0.481645	-0.82854	-0.72248	-0.51523	-0.85937				0.781603	-0.33972	1.218494	-0.02194	2.430278	-0.80961	-0.18715	-1.09713	-1.03323	0.48507	-0.69041
6.41724	-0.7867	0.095418	1.818652	-0.36572	-0.74613	-0.74357	0.460549	-0.81577	-0.7739	-0.56275	-0.91006				0.714257	-0.44199	1.170477	-0.04497	2.646681	-0.79292	-0.19571	-1.21697	-0.96596	0.463899	-0.7164
6.42544	-0.81074	0.071821	1.604617	-0.44721	-0.74665	-0.79152	0.460414	-0.79607	-0.85281	-0.61294	-0.9645				0.697443	-0.49944	1.166061	-0.03229	2.839215	-0.74658	-0.16919	-1.30449	-0.94079	0.461808	-0.72813
6.43365	-0.81031	0.024082	1.446039	-0.49893	-0.77776	-0.80847	0.490331	-0.69267	-0.93633	-0.7007	-1.0192				0.723753	-0.51332	1.149839	0.009574	3.001128	-0.68204	-0.12833	-1.33414	-0.96984	0.455062	-0.72184
6.44185	-0.757	-0.04198	1.388654	-0.55994	-0.8149	-0.80111	0.526479	-0.48305	-1.01554	-0.83125	-1.06837				0.745573	-0.51772	1.091723	0.052467	3.120584	-0.62889	-0.10907	-1.34544	-1.02187	0.426381	-0.71027
6.45005	-0.66691	-0.09261	1.426412	-0.62844	-0.83047	-0.78747	0.540452	-0.24102	-1.09693	-0.97057	-1.1038				0.714021	-0.52473	1.029067	0.059881	3.192595	-0.61212	-0.12766	-1.38049	-1.05294	0.394869	-0.70852
6.45826	-0.58099	-0.09725	1.494969	-0.65423	-0.82542	-0.77675	0.522315	-0.0411	-1.18973	-1.06913	-1.12907				0.62685	-0.51488	1.051246	0.0198	3.213379	-0.63626	-0.16748	-1.43515	-1.0461	0.389895	-0.7135
6.46646	-0.53238	-0.06572	1.531014	-0.60088	-0.82473	-0.7512	0.481858	0.091851	-1.28116	-1.10907	-1.15723				0.534548	-0.46628	1.18092	-0.05701	3.194756	-0.67494	-0.19451	-1.48863	-0.99277	0.413576	-0.70512
6.47466	-0.5277	-0.02558	1.498765	-0.5063	-0.84566	-0.69035	0.434796	0.200241	-1.34062	-1.10278	-1.18486				0.504304	-0.37101	1.362491	-0.13914	3.151163	-0.69134	-0.1931	-1.5175	-0.86361	0.428414	-0.6515
6.48287	-0.5576	-0.00321	1.398853	-0.46259	-0.88329	-0.59874	0.386826	0.299368	-1.36078	-1.08174	-1.18668				0.54816	-0.26561	1.516352	-0.18473	3.097348	-0.68115	-0.17633	-1.5217	-0.62993	0.413851	-0.53736
6.49107	-0.60556	0.00388	1.281829	-0.50586	-0.91913	-0.50433	0.341544	0.339462	-1.35207	-1.07701	-1.14951				0.629985	-0.20975	1.598325	-0.18127	3.048616	-0.67203	-0.16563	-1.50305	-0.3143	0.387986	-0.36956
6.49927	-0.64483	0.007732	1.212547	-0.58638	-0.95395	-0.43897	0.305347	0.269629	-1.33291	-1.09512	-1.08994				0.699868	-0.23565	1.603897	-0.13848	3.003921	-0.69528	-0.17275	-1.45407	0.021046	0.384241	-0.17401
6.50748	-0.66607	0.006773	1.239874	-0.63114	-0.99284	-0.40835	0.275488	0.088578	-1.30993	-1.12372	-1.05073				0.737014	-0.31493	1.557916	-0.08736	2.952225	-0.74637	-0.19394	-1.38219	0.329161	0.410367	0.017681
6.5156	-0.67598	0.00236	1.342609	-0.6324	-1.02718	-0.40031	0.241233	-0.13108	-1.2789	-1.13328	-1.06029				0.749002	-0.3721	1.514109	-0.05475	2.874812	-0.79503	-0.21806	-1.30008	0.597007	0.440617	0.176546
6.5238	-0.69352	0.007698	1.44286	-0.64126	-1.04215	-0.39703	0.191348	-0.31552	-1.24925	-1.12312	-1.11261				0.725399	-0.36243	1.515045	-0.03803	2.769315	-0.81202	-0.24159	-1.22875	0.817724	0.446924	0.282732
6.532	-0.72187	0.05471	1.458245	-0.69165	-1.02526	-0.39042	0.131243	-0.4426	-1.23521	-1.13411	-1.18338				0.652212	-0.30588	1.566969	-0.01611	2.664792	-0.78859	-0.26184	-1.18971	0.982089	0.422479	0.332746
6.54021	-0.74522	0.148123	1.370446	-0.75506	-0.9885	-0.39502	0.080033	-0.52447	-1.25387	-1.20235	-1.24163				0.530601	-0.27031	1.620958	0.031627	2.586306	-0.75488	-0.2816	-1.19838	1.069249	0.395778	0.339411
6.54841	-0.75708	0.256893	1.249471	-0.77546	-0.95	-0.42373	0.057334	-0.57503	-1.30057	-1.31445	-1.2662				0.409555	-0.2972	1.627507	0.095377	2.531418	-0.73661	-0.30257	-1.2394	1.074769	0.392987	0.322523
6.55661	-0.75884	0.346185	1.163663	-0.74867	-0.92741	-0.47265	0.063433	-0.5783	-1.35397	-1.40118	-1.25004				0.342548	-0.36275	1.57572	0.148819	2.474163	-0.74224	-0.32939	-1.26137	1.023154	0.412733	0.288801
6.56482	-0.76009	0.411354	1.139977	-0.71176	-0.92142	-0.5184	0.075348	-0.53068	-1.40141	-1.41148	-1.21755				0.346743	-0.40696	1.502552	0.164876	2.400126	-0.76003	-0.36593	-1.23071	0.960717	0.428119	0.236067
6.57302	-0.75438	0.476203	1.133342	-0.70413	-0.91636	-0.53532	0.07281	-0.44558	-1.4459	-1.35508	-1.20513				0.402823	-0.40442	1.461703	0.137677	2.314269	-0.77224	-0.41069	-1.13686	0.9323	0.406282	0.168452
6.58122	-0.72819	0.54499	1.087838	-0.73765	-0.89519	-0.52393	0.050475	-0.3696	-1.49797	-1.30466	-1.22195				0.44881	-0.38638	1.463106	0.08727	2.23343	-0.77511	-0.46758	-0.99282	0.954624	0.350841	0.09797
6.58943	-0.69514	0.582649	0.996274	-0.78577	-0.83762	-0.50838	0.019831	-0.35464	-1.56035	-1.31981	-1.24861				0.439574	-0.38372	1.503804	0.04055	2.172166	-0.7794	-0.53149	-0.83357	1.00358	0.296236	0.048322
6.59763	-0.68014	0.540611	0.881704	-0.81859	-0.7574	-0.51437	-0.00946	-0.42054	-1.6201	-1.39073	-1.25667				0.373751	-0.41532	1.591005	0.014555	2.129013	-0.80424	-0.59005	-0.68269	1.024476	0.267895	0.027602
6.60575	-0.70359	0.434744	0.805786	-0.79991	-0.70062	-0.54553	-0.03261	-0.54505	-1.65165	-1.45829	-1.24601				0.279228	-0.46563	1.749778	0.000848	2.095762	-0.8441	-0.62359	-0.56027	0.974324	0.250665	0.02187
6.61395	-0.75374	0.344173	0.811418	-0.71919	-0.70467	-0.59326	-0.05051	-0.69014	-1.64632	-1.45603	-1.23405				0.201744	-0.49817	2.01335	-0.01494	2.060251	-0.87717	-0.62405	-0.47882	0.858187	0.207055	0.007096
6.62216	-0.81034	0.329196	0.886965	-0.59165	-0.76656	-0.64584	-0.06452	-0.83822	-1.62761	-1.34258	-1.22352				0.160064	-0.4939	2.374249	-0.05339	2.019828	-0.87533	-0.5998	-0.44925	0.708681	0.127939	-0.03349
6.63036	-0.85956	0.377029	0.958099	-0.44867	-0.84293	-0.69135	-0.07353	-0.96265	-1.62175	-1.10493	-1.20596				0.146543	-0.47085	2.798244	-0.12295	1.980471	-0.83063	-0.57472	-0.45501	0.554697	0.028163	-0.09236
6.63856	-0.88474	0.414334	0.944428	-0.32928	-0.90237	-0.72257	-0.09021	-1.04946	-1.63649	-0.77177	-1.18267				0.137849	-0.484	3.196071	-0.20823	1.951165	-0.76397	-0.57904	-0.47282	0.409927	-0.0556	-0.15267
6.64677	-0.87305	0.38577	0.857787	-0.2502	-0.93539	-0.73399	-0.12238	-1.08823	-1.66013	-0.41089	-1.17928				0.12488	-0.54908	3.487985	-0.29125	1.936458	-0.7085	-0.61407	-0.48251	0.278868	-0.08885	-0.19374
6.65497	-0.82291	0.288842	0.776561	-0.2161	-0.9412	-0.73299	-0.17056	-1.08689	-1.67971	-0.08662	-1.21182				0.122929	-0.625	3.665717	-0.34946	1.921674	-0.68971	-0.6646	-0.47948	0.143318	-0.06087	-0.20967
6.66317	-0.75866	0.176902	0.76613	-0.21655	-0.91476	-0.73988	-0.22608	-1.07265	-1.68817	0.148435	-1.26373				0.133643	-0.64196	3.750153	-0.38073	1.902908	-0.70845	-0.70681	-0.49053	-0.02507	0.017123	-0.21287
6.67138	-0.71331	0.099694	0.796034	-0.23211	-0.85571	-0.77654	-0.27335	-1.0461	-1.68369	0.291171	-1.30651				0.144029	-0.56147	3.760747	-0.39781	1.876666	-0.75218	-0.73761	-0.53254	-0.20797	0.10952	-0.21416
6.67958	-0.70132	0.062052	0.800339	-0.25353	-0.78397	-0.84149	-0.30187	-0.9913	-1.67416	0.361783	-1.32128				0.14422	-0.43023	3.686465	-0.41787	1.849926	-0.80145	-0.76139	-0.58876	-0.356	0.173138	-0.22457
6.68778	-0.71327	0.046436	0.81023	-0.28768	-0.73105	-0.9115	-0.30597	-0.89544	-1.66008	0.395961	-1.31102				0.148539	-0.32976	3.559722	-0.45664	1.836577	-0.83483	-0.77862	-0.61673	-0.4201	0.179831	-0.2507
6.6959	-0.73389	0.022511	0.919045	-0.35505	-0.71284	-0.95876	-0.29839	-0.79746	-1.64788	0.426325	-1.28629				0.171962	-0.30524	3.464265	-0.50987	1.844758	-0.83956	-0.79312	-0.60975	-0.39843	0.130528	-0.28856
6.70411	-0.76319	-0.02227	1.137632	-0.45743	-0.7105	-0.95875	-0.29507	-0.77213	-1.63835	0.460621	-1.26314				0.231808	-0.33653	3.466343	-0.57301	1.878265	-0.818	-0.7925	-0.61492	-0.32502	0.039555	-0.32386
6.71231	-0.79054	-0.05604	1.336499	-0.57636	-0.71104	-0.91858	-0.30562	-0.83633	-1.62369	0.495029	-1.25624				0.343021	-0.36722	3.563354	-0.63836	1.916563	-0.79077	-0.77118	-0.66701	-0.24698	-0.07092	-0.35116
6.72051	-0.7968	-0.02764	1.380969	-0.66931	-0.71783	-0.86623	-0.32895	-0.93598	-1.60367	0.513812	-1.27396				0.503435	-0.35325	3.658329	-0.69853	1.932492	-0.77401	-0.72963	-0.76481	-0.19792	-0.16757	-0.37367
6.72871	-0.75879	0.083378	1.232838	-0.69748	-0.73851	-0.82482	-0.34887	-0.9948	-1.58725	0.515712	-1.30464				0.68399	-0.28037	3.662264	-0.74452	1.906981	-0.76109	-0.68062	-0.85148	-0.1892	-0.22595	-0.39855
6.73692	-0.68307	0.233736	1.001197	-0.6609	-0.7713	-0.8034	-0.35405	-0.99073	-1.58962	0.511845	-1.32007				0.819471	-0.17415	3.563258	-0.75828	1.84544	-0.72594	-0.64298	-0.88343	-0.23393	-0.24137	-0.43467
6.74512	-0.61596	0.359901	0.842372	-0.5898	-0.79819	-0.79755	-0.34582	-0.9788	-1.60357	0.503664	-1.30422				0.873093	-0.07175	3.423169	-0.73342	1.774339	-0.64597	-0.62643	-0.86644	-0.31618	-0.2387	-0.47452
6.75332	-0.59358	0.422669	0.820229	-0.53054	-0.81049	-0.80469	-0.34407	-1.02839	-1.60826	0.489064	-1.2584				0.880479	-0.00113	3.294609	-0.68199	1.700054	-0.53989	-0.62621	-0.82605	-0.39294	-0.24103	-0.50192
6.76153	-0.62949	0.43109	0.914169	-0.50658	-0.81409	-0.81715	-0.36903	-1.16027	-1.59056	0.47528	-1.20539				0.90248	0.027006	3.195906	-0.63023	1.611772	-0.44937	-0.6212	-0.79723	-0.42062	-0.24324	-0.50539
6.76973	-0.7065	0.40998	1.053459	-0.51064	-0.82593	-0.82716	-0.42478	-1.32265	-1.5543	0.488578	-1.16927				0.955877	0.011027	3.129686	-0.59954	1.505188	-0.39886	-0.60458	-0.80054	-0.38405	-0.22478	-0.48532
6.77793	-0.80129	0.376027	1.18525	-0.51024	-0.85069	-0.82357	-0.4885	-1.44305	-1.52458	0.53556	-1.15839				0.985174	-0.03928	3.1051	-0.60504	1.392996	-0.37895	-0.58022	-0.8387	-0.30919	-0.18564	-0.45427
6.78606	-0.8796	0.343827	1.300531	-0.47878	-0.86249	-0.79553	-0.52751	-1.47489	-1.51851	0.587764	-1.17115				0.964819	-0.10567	3.161757	-0.64733	1.294991	-0.35709	-0.55632	-0.87361	-0.23461	-0.15558	-0.42711
6.79426	-0.89908	0.324272	1.407803	-0.41443	-0.83667	-0.74479	-0.53121	-1.42539	-1.53109	0.608809	-1.19342				0.943032	-0.18653	3.283327	-0.7037	1.231367	-0.31272	-0.53135	-0.86084	-0.18741	-0.14338	-0.40952
6.80246	-0.85601	0.325317	1.496481	-0.32399	-0.76181	-0.67222	-0.51655	-1.34662	-1.5418	0.582312	-1.21722				1.006273	-0.27132	3.40022	-0.75058	1.208821	-0.24215	-0.5034	-0.80111	-0.16063	-0.12698	-0.3816
6.81067	-0.78701	0.326198	1.515707	-0.24556	-0.66152	-0.57702	-0.51133	-1.30345	-1.5422	0.525327	-1.23808				1.202999	-0.33513	3.441344	-0.77321	1.207719	-0.15911	-0.48078	-0.73549	-0.13247	-0.07444	-0.31155
6.81887	-0.7476	0.296667	1.466592	-0.22052	-0.57979	-0.4574	-0.52681	-1.33233	-1.5449	0.462436	-1.25124				1.500293	-0.34515	3.387741	-0.78052	1.200476	-0.07525	-0.47153	-0.71912	-0.09101	0.026646	-0.17983
6.82707	-0.76308	0.234608	1.420841	-0.25278	-0.54137	-0.32083	-0.56027	-1.39852	-1.57105	0.407943	-1.24505				1.838961	-0.28867	3.295242	-0.78181	1.162868	0.007926	-0.478	-0.75449	-0.02742	0.141215	0.012628
6.83527	-0.80036	0.160785	1.434019	-0.31387	-0.54167	-0.18222	-0.60865	-1.43034	-1.63134	0.363105	-1.20833				2.12456	-0.1965	3.224923	-0.77549	1.086571	0.091408	-0.48561	-0.7929	0.060831	0.227533	0.237253
6.84348	-0.80343	0.09642	1.498657	-0.34742	-0.55198	-0.05791	-0.6654	-1.38615	-1.70045	0.32771	-1.15185				2.284163	-0.10054	3.209403	-0.75832	0.99003	0.180288	-0.48521	-0.79967	0.187098	0.271424	0.462455
6.85168	-0.73647	0.033454	1.546491	-0.3346	-0.55773	0.040359	-0.72277	-1.29715	-1.73581	0.292861	-1.09441				2.295755	-0.02856	3.233535	-0.72762	0.90816	0.277615	-0.47911	-0.80858	0.355262	0.287595	0.661585
6.85988	-0.62046	-0.03156	1.543852	-0.30568	-0.5682	0.110492	-0.76922	-1.24093	-1.70101	0.243012	-1.0596				2.189865	0.008787	3.266432	-0.71063	0.864517	0.374979	-0.47123	-0.87183	0.539628	0.296648	0.818688
6.86809	-0.50462	-0.08339	1.505523	-0.295	-0.60332	0.14714	-0.79674	-1.2454	-1.59476	0.181232	-1.04964				2.027398	0.001427	3.298173	-0.73085	0.844849	0.451727	-0.45222	-0.98526	0.680782	0.316466	0.93641
6.87621	-0.4295	-0.10874	1.451887	-0.2944	-0.6642	0.144367	-0.80929	-1.2809	-1.46159	0.119104	-1.04787				1.86006	-0.05502	3.326515	-0.78152	0.828707	0.485573	-0.39207	-1.09715	0.731963	0.351893	1.026171
6.88441	-0.40468	-0.10326	1.383006	-0.26626	-0.7278	0.100265	-0.81457	-1.27789	-1.36251	0.069537	-1.04089				1.717373	-0.13426	3.373735	-0.82539	0.810283	0.468642	-0.2609	-1.1504	0.704196	0.380234	1.100016
6.89261	-0.42229	-0.09	1.310313	-0.20184	-0.76532	0.027679	-0.81706	-1.20614	-1.34177	0.028993	-1.02729				1.601086	-0.2022	3.437712	-0.82178	0.794077	0.408383	-0.0595	-1.14314	0.641493	0.375829	1.150636
6.90082	-0.47641	-0.08408	1.267988	-0.12468	-0.77207	-0.05245	-0.81457	-1.09877	-1.38784	-0.01386	-1.00944				1.498443	-0.24313	3.468297	-0.7688	0.796387	0.324365	0.168987	-1.11465	0.589417	0.337788	1.16022
6.90902	-0.56103	-0.09284	1.237852	-0.06858	-0.77404	-0.12405	-0.80604	-1.00207	-1.4579	-0.06516	-0.97886				1.38334	-0.27508	3.416317	-0.68335	0.815117	0.227369	0.359982	-1.09223	0.548674	0.296027	1.122289
6.91722	-0.6668	-0.12306	1.149822	-0.03312	-0.79686	-0.17904	-0.79197	-0.94563	-1.51006	-0.13159	-0.92523				1.239581	-0.31782	3.265703	-0.59883	0.830015	0.12723	0.475929	-1.07849	0.487391	0.285811	1.054997
6.92543	-0.76978	-0.1749	0.980381	0.00141	-0.84481	-0.2141	-0.76709	-0.9201	-1.5236	-0.19697	-0.84628				1.090377	-0.34953	3.038069	-0.55097	0.817213	0.034366	0.528147	-1.06871	0.388198	0.30923	0.98743
6.93363	-0.83919	-0.24573	0.823871	0.037722	-0.90447	-0.22725	-0.73744	-0.91175	-1.5082	-0.2404	-0.75697				0.970593	-0.33273	2.767453	-0.55699	0.760861	-0.04505	0.544629	-1.08884	0.264485	0.332094	0.934804
6.94183	-0.86296	-0.31891	0.808548	0.064075	-0.95389	-0.2183	-0.72491	-0.92033	-1.47257	-0.2461	-0.67143				0.91237	-0.25714	2.488554	-0.6085	0.660731	-0.10635	0.541878	-1.14996	0.151244	0.3211	0.897405
6.95004	-0.84517	-0.36695	0.972326	0.081479	-0.98346	-0.19797	-0.75251	-0.94415	-1.43132	-0.2187	-0.59081				0.903135	-0.15915	2.218833	-0.66915	0.537031	-0.15704	0.510338	-1.21688	0.078041	0.278588	0.865968
6.95824	-0.81482	-0.37342	1.227483	0.122925	-0.98941	-0.18156	-0.81645	-0.9806	-1.41378	-0.19231	-0.5228				0.894429	-0.1076	1.981994	-0.69867	0.435707	-0.19347	0.440383	-1.23276	0.04905	0.227291	0.833188
6.96636	-0.80472	-0.33987	1.40572	0.204275	-0.98406	-0.18467	-0.88031	-1.0211	-1.44625	-0.20214	-0.48092				0.854396	-0.14188	1.814113	-0.67298	0.384863	-0.20997	0.345677	-1.15779	0.053933	0.181452	0.788315
6.97456	-0.84041	-0.28721	1.406954	0.3098	-0.98184	-0.20793	-0.90039	-1.07294	-1.5262	-0.25814	-0.47273				0.784862	-0.23756	1.732924	-0.6164	0.370356	-0.20494	0.256141	-1.03077	0.067764	0.140273	0.719977
6.98277	-0.89575	-0.24175	1.236572	0.393366	-0.98204	-0.23797	-0.86167	-1.14659	-1.61194	-0.33354	-0.48672				0.726572	-0.33796	1.731617	-0.58532	0.34798	-0.18997	0.205271	-0.9299	0.068547	0.083479	0.621813
6.99097	-0.91153	-0.22041	0.99254	0.413824	-0.97515	-0.26535	-0.79615	-1.24407	-1.66578	-0.39481	-0.49395				0.688546	-0.41045	1.761446	-0.61833	0.283908	-0.19162	0.199225	-0.89715	0.028119	-0.00425	0.506415
6.99917	-0.86866	-0.2095	0.814304	0.375836	-0.94971	-0.28735	-0.74283	-1.34744	-1.68473	-0.42954	-0.47689				0.649223	-0.4428	1.79752	-0.70527	0.18375	-0.22329	0.221871	-0.90982	-0.0634	-0.1242	0.409789
7.00738	-0.80204	-0.19081	0.754403	0.317246	-0.923	-0.30674	-0.7235	-1.45821	-1.69717	-0.44048	-0.43885				0.589016	-0.45262	1.869078	-0.78771	0.082312	-0.2791	0.242154	-0.9158	-0.18661	-0.2455	0.356157
7.01558	-0.76836	-0.16547	0.794769	0.289728	-0.93171	-0.32908	-0.725	-1.60013	-1.72365	-0.4386	-0.40062				0.517656	-0.46089	2.00892	-0.81096	0.010578	-0.33656	0.239275	-0.89474	-0.30282	-0.32569	0.342584
7.02378	-0.78646	-0.16672	0.880824	0.302538	-0.99859	-0.36273	-0.71982	-1.76967	-1.75369	-0.42646	-0.36897				0.474499	-0.4911	2.191894	-0.75691	-0.03427	-0.37922	0.208396	-0.85662	-0.37968	-0.35068	0.349707
7.03198	-0.82565	-0.21516	0.9583	0.319028	-1.10625	-0.41207	-0.69293	-1.91435	-1.76499	-0.40761	-0.32885				0.453152	-0.55835	2.303805	-0.66017	-0.06032	-0.40135	0.161277	-0.83196	-0.42727	-0.33271	0.353862
7.04019	-0.85893	-0.27722	0.993913	0.307132	-1.19692	-0.47133	-0.64203	-1.95876	-1.74014	-0.39307	-0.25444				0.415284	-0.63741	2.251771	-0.56654	-0.06574	-0.40162	0.112773	-0.84929	-0.4711	-0.30403	0.344059
7.04839	-0.87791	-0.29582	0.979856	0.250151	-1.21879	-0.52783	-0.58178	-1.88611	-1.69619	-0.3966	-0.12493				0.346449	-0.68562	2.041018	-0.5005	-0.04032	-0.38324	0.058189	-0.92025	-0.53072	-0.29475	0.31599
7.05659	-0.88146	-0.24956	0.945971	0.170814	-1.15895	-0.56444	-0.52341	-1.75141	-1.66077	-0.42909	0.046311				0.27218	-0.66606	1.782606	-0.4896	0.022541	-0.35351	-0.01284	-1.0291	-0.59609	-0.3163	0.283562
7.06472	-0.85455	-0.18551	0.916916	0.106657	-1.05154	-0.57616	-0.48003	-1.63227	-1.65087	-0.49191	0.218375				0.224907	-0.59425	1.598462	-0.53481	0.098376	-0.33316	-0.10921	-1.13331	-0.64663	-0.36723	0.267675
7.07292	-0.7935	-0.16782	0.908213	0.087634	-0.9457	-0.57388	-0.45856	-1.58462	-1.66458	-0.57825	0.352262				0.206198	-0.52714	1.502029	-0.60712	0.156057	-0.34584	-0.21088	-1.18708	-0.67873	-0.43846	0.277967
7.08112	-0.72247	-0.20457	0.898569	0.128511	-0.88573	-0.57302	-0.45386	-1.58416	-1.69379	-0.66306	0.440931				0.211487	-0.49688	1.460699	-0.67224	0.177488	-0.39374	-0.29175	-1.156	-0.70566	-0.5198	0.303091
7.08933	-0.67637	-0.25822	0.848065	0.204024	-0.88634	-0.58055	-0.45767	-1.56695	-1.73639	-0.72908	0.510585				0.245487	-0.49781	1.418116	-0.71945	0.17554	-0.44694	-0.3439	-1.05338	-0.74524	-0.58864	0.311201
7.09753	-0.67413	-0.28874	0.739019	0.262614	-0.92456	-0.59079	-0.45046	-1.47669	-1.7816	-0.76743	0.592578				0.317095	-0.49643	1.343366	-0.77327	0.169378	-0.47132	-0.37965	-0.91443	-0.79859	-0.62237	0.281321
7.10573	-0.70185	-0.29824	0.58203	0.263135	-0.95969	-0.59932	-0.42295	-1.30587	-1.81769	-0.78418	0.703723				0.408845	-0.47945	1.254954	-0.84676	0.15814	-0.46514	-0.42147	-0.78663	-0.86201	-0.61302	0.222665
7.11393	-0.74152	-0.30231	0.417156	0.222219	-0.95759	-0.59543	-0.38388	-1.12468	-1.82657	-0.79809	0.838201				0.486689	-0.4498	1.208162	-0.92689	0.14811	-0.44698	-0.45783	-0.71724	-0.91703	-0.58588	0.161997
7.12214	-0.77295	-0.30013	0.285319	0.176959	-0.92086	-0.57981	-0.35833	-1.02551	-1.80359	-0.8038	0.987298				0.515051	-0.4093	1.244594	-0.9748	0.153207	-0.43542	-0.47413	-0.70783	-0.9455	-0.5923	0.113955
7.13034	-0.78779	-0.27854	0.216592	0.134916	-0.87311	-0.5644	-0.36654	-1.06095	-1.77053	-0.78668	1.151509				0.476224	-0.36457	1.347783	-0.96628	0.187162	-0.42976	-0.46802	-0.73115	-0.94346	-0.66792	0.071586
7.13854	-0.7777	-0.22617	0.202443	0.081287	-0.82998	-0.56121	-0.40224	-1.19429	-1.75109	-0.74071	1.332027				0.400917	-0.32651	1.465308	-0.91597	0.236008	-0.41858	-0.45877	-0.74792	-0.92811	-0.79481	0.019517
7.14675	-0.75698	-0.15063	0.218536	0.024623	-0.79013	-0.57959	-0.44413	-1.34348	-1.76369	-0.67447	1.525146				0.326873	-0.31235	1.559154	-0.85116	0.254766	-0.40314	-0.46819	-0.76163	-0.93418	-0.90888	-0.05748
7.15487	-0.77272	-0.06182	0.245432	0.020462	-0.74121	-0.61415	-0.47478	-1.46063	-1.80516	-0.61031	1.710064				0.288508	-0.31991	1.647608	-0.79362	0.223725	-0.39221	-0.49716	-0.80842	-0.97326	-0.97115	-0.15344
7.16307	-0.85038	0.04191	0.254536	0.109835	-0.68797	-0.65686	-0.49745	-1.53759	-1.8514	-0.56772	1.873564				0.290606	-0.32464	1.757566	-0.7483	0.176407	-0.3881	-0.52857	-0.90288	-1.01985	-0.99051	-0.25064
7.17128	-0.96655	0.152632	0.24034	0.268085	-0.64194	-0.70143	-0.52362	-1.58515	-1.87362	-0.55632	2.014933				0.304522	-0.30598	1.873674	-0.70205	0.169527	-0.38622	-0.54394	-1.02528	-1.02966	-0.98899	-0.3312
7.17948	-1.05215	0.241587	0.206794	0.405877	-0.59962	-0.74842	-0.56452	-1.60113	-1.85754	-0.56723	2.142192				0.3038	-0.27108	1.958343	-0.63677	0.210874	-0.39086	-0.54961	-1.11579	-0.97337	-0.97251	-0.3872
7.18768	-1.05885	0.271395	0.176242	0.461848	-0.55134	-0.79836	-0.61645	-1.56233	-1.82042	-0.59529	2.248345				0.271041	-0.23402	1.992272	-0.55037	0.251624	-0.41392	-0.55776	-1.15392	-0.86992	-0.92947	-0.42106
7.19588	-1.00241	0.230981	0.167462	0.44505	-0.48164	-0.84008	-0.66808	-1.45142	-1.78972	-0.63654	2.298565				0.224873	-0.18143	2.006897	-0.46437	0.242185	-0.45146	-0.57339	-1.15994	-0.75399	-0.8736	-0.42785
7.20409	-0.93419	0.134942	0.15501	0.390621	-0.37859	-0.8663	-0.71286	-1.30103	-1.78223	-0.66304	2.273977				0.193376	-0.10094	2.006264	-0.40382	0.179762	-0.49428	-0.59251	-1.15027	-0.64275	-0.83866	-0.41115
7.21229	-0.9017	0.018788	0.134071	0.345226	-0.21782	-0.8793	-0.74873	-1.17863	-1.79169	-0.63288	2.19965				0.19394	0.001564	1.964287	-0.38188	0.09549	-0.53404	-0.61352	-1.12749	-0.51293	-0.85499	-0.39329
7.22049	-0.90433	-0.08348	0.128809	0.31451	0.006089	-0.89189	-0.77993	-1.12765	-1.80863	-0.52388	2.131531				0.225809	0.090948	1.861594	-0.38623	0.014303	-0.5624	-0.64558	-1.09426	-0.34247	-0.91536	-0.41108
7.2287	-0.93146	-0.14366	0.187275	0.273787	0.260485	-0.91463	-0.80445	-1.14957	-1.8335	-0.36882	2.105036				0.253449	0.136719	1.710388	-0.41218	-0.04605	-0.5776	-0.69192	-1.08094	-0.14484	-0.97439	-0.48434
7.2369	-0.98634	-0.14552	0.307138	0.215948	0.49331	-0.94789	-0.81578	-1.19978	-1.86861	-0.21407	2.1069				0.241833	0.138518	1.572005	-0.45896	-0.08025	-0.5764	-0.7411	-1.11991	0.029889	-0.9996	-0.58312
7.24502	-1.06925	-0.11075	0.423791	0.168204	0.659315	-0.98073	-0.81453	-1.23973	-1.90294	-0.06818	2.106948				0.180611	0.110975	1.494806	-0.51381	-0.08273	-0.56068	-0.7688	-1.2149	0.128053	-0.97611	-0.65387
7.25322	-1.17158	-0.07943	0.485112	0.181987	0.759815	-0.99931	-0.81292	-1.26392	-1.90193	0.10868	2.089154				0.100691	0.080742	1.498369	-0.56542	-0.07204	-0.54457	-0.76023	-1.3294	0.135231	-0.91692	-0.66096
7.26143	-1.25548	-0.09479	0.473755	0.27318	0.821162	-1.00189	-0.83093	-1.29863	-1.83632	0.338502	2.054663				0.043157	0.053062	1.566928	-0.6116	-0.08371	-0.54662	-0.72495	-1.41216	0.076795	-0.84827	-0.61642
7.26963	-1.27303	-0.1675	0.425319	0.405444	0.868438	-0.99104	-0.87213	-1.35787	-1.70698	0.570902	1.998684				0.023839	0.021591	1.654817	-0.67177	-0.12248	-0.56839	-0.68534	-1.43818	-0.00771	-0.78345	-0.56692
7.27783	-1.20112	-0.27597	0.40151	0.50783	0.905473	-0.97366	-0.9165	-1.41027	-1.55513	0.729613	1.912223				0.036086	-0.01241	1.730902	-0.74902	-0.16211	-0.596	-0.66444	-1.40665	-0.09393	-0.73498	-0.54291
7.28604	-1.0786	-0.3855	0.446027	0.53894	0.923087	-0.94877	-0.93994	-1.42029	-1.44098	0.779206	1.802537				0.076288	-0.0469	1.761817	-0.81637	-0.17001	-0.62205	-0.66418	-1.34875	-0.17956	-0.72472	-0.54926
7.29424	-0.97786	-0.45212	0.559409	0.530474	0.923008	-0.91696	-0.93423	-1.37223	-1.39774	0.753919	1.694363				0.149746	-0.07307	1.726045	-0.8435	-0.1417	-0.64488	-0.66263	-1.29862	-0.26624	-0.77508	-0.5738
7.30244	-0.93744	-0.4598	0.716413	0.534298	0.92011	-0.88895	-0.91214	-1.28946	-1.4154	0.701814	1.605051				0.232598	-0.08761	1.613349	-0.8265	-0.10401	-0.67394	-0.63984	-1.29305	-0.3611	-0.87322	-0.60733
7.31065	-0.93622	-0.42003	0.888339	0.568028	0.932122	-0.87662	-0.8858	-1.2261	-1.44921	0.639475	1.520163				0.264421	-0.08029	1.438245	-0.80147	-0.0851	-0.71477	-0.59872	-1.34232	-0.45627	-0.97134	-0.64249
7.31885	-0.92447	-0.37052	1.018263	0.598937	0.951763	-0.8894	-0.85378	-1.21587	-1.45653	0.574822	1.423718				0.192587	-0.04098	1.247428	-0.78178	-0.09927	-0.76374	-0.56103	-1.4117	-0.53272	-1.01171	-0.67088
7.32705	-0.8909	-0.36785	1.058613	0.593726	0.956439	-0.9191	-0.81106	-1.26862	-1.42228	0.512977	1.320898				0.035094	0.011486	1.077153	-0.7472	-0.13551	-0.80497	-0.54382	-1.4604	-0.58018	-0.96914	-0.68664
7.33517	-0.8635	-0.43372	0.997894	0.552858	0.933906	-0.95	-0.75856	-1.34586	-1.35221	0.463528	1.234528				-0.12344	0.036642	0.945003	-0.6896	-0.18139	-0.829	-0.5436	-1.46493	-0.60399	-0.87635	-0.69014
7.34338	-0.87513	-0.54493	0.875439	0.508167	0.897388	-0.97247	-0.71292	-1.39828	-1.27064	0.424253	1.178038				-0.21978	-0.0006	0.846203	-0.63073	-0.23177	-0.83949	-0.54812	-1.45458	-0.6276	-0.78386	-0.69189
7.35158	-0.92048	-0.64306	0.763738	0.484848	0.880152	-0.98725	-0.69257	-1.41026	-1.1978	0.38657	1.144915				-0.24653	-0.08709	0.782267	-0.61112	-0.27815	-0.84098	-0.54762	-1.45375	-0.65903	-0.72087	-0.69387
7.35978	-0.95803	-0.68227	0.707973	0.469669	0.886538	-1.0003	-0.70223	-1.39324	-1.14874	0.354615	1.128028				-0.25309	-0.17705	0.757929	-0.65261	-0.30579	-0.84478	-0.55519	-1.42695	-0.70113	-0.68605	-0.69051
7.36799	-0.96119	-0.65465	0.71808	0.448161	0.893954	-1.01133	-0.7238	-1.36448	-1.12939	0.327519	1.113705				-0.27199	-0.23786	0.774521	-0.7364	-0.28136	-0.84078	-0.58559	-1.31354	-0.74444	-0.67786	-0.67263
7.37619	-0.92342	-0.58632	0.76576	0.41626	0.87178	-1.01983	-0.73211	-1.3292	-1.13193	0.296991	1.087601				-0.2921	-0.27745	0.817627	-0.80135	-0.19157	-0.81999	-0.6339	-1.08891	-0.76838	-0.70164	-0.64607
7.38439	-0.86687	-0.52668	0.84143	0.393414	0.808437	-1.0279	-0.7168	-1.30549	-1.13788	0.249338	1.036222				-0.31231	-0.31466	0.863456	-0.79529	-0.07538	-0.79687	-0.68394	-0.81409	-0.77469	-0.75733	-0.62555
7.3926	-0.82793	-0.51205	0.919755	0.392817	0.718116	-1.04214	-0.68627	-1.31715	-1.11734	0.186671	0.957413				-0.33753	-0.34722	0.914005	-0.71756	-0.00126	-0.79271	-0.7152	-0.58271	-0.78252	-0.83999	-0.61888
7.4008	-0.83176	-0.55406	0.977974	0.399559	0.619454	-1.07625	-0.66271	-1.38398	-1.04818	0.139116	0.868144				-0.37233	-0.36065	0.953162	-0.62618	-0.00131	-0.81836	-0.7197	-0.45	-0.81337	-0.92156	-0.63481
7.409	-0.8849	-0.62195	1.05153	0.399241	0.53795	-1.13048	-0.65817	-1.48455	-0.9337	0.133158	0.791114				-0.39531	-0.33636	0.971708	-0.59925	-0.05183	-0.85992	-0.69898	-0.39992	-0.86139	-0.96938	-0.67721
7.4172	-0.95819	-0.66427	1.167798	0.38934	0.487617	-1.18502	-0.67373	-1.5529	-0.81073	0.165369	0.742548				-0.38377	-0.2839	0.998716	-0.65673	-0.1139	-0.89804	-0.66301	-0.36416	-0.89114	-0.97355	-0.73991
7.42533	-1.02103	-0.63057	1.309372	0.390361	0.463806	-1.20891	-0.70292	-1.54156	-0.72815	0.193583	0.721121				-0.3394	-0.22243	1.071829	-0.74121	-0.16356	-0.9153	-0.61574	-0.29725	-0.87358	-0.94663	-0.80129
7.43353	-1.05429	-0.50281	1.394934	0.40424	0.444098	-1.18776	-0.74051	-1.45336	-0.70738	0.177076	0.716286				-0.26523	-0.15526	1.169775	-0.768	-0.20857	-0.90556	-0.56857	-0.18471	-0.82136	-0.92062	-0.83846
7.44173	-1.05519	-0.32239	1.363718	0.406754	0.400846	-1.14406	-0.78228	-1.34584	-0.73224	0.106135	0.72382				-0.17549	-0.08515	1.191335	-0.71827	-0.25498	-0.86893	-0.52978	-0.05977	-0.78619	-0.91943	-0.84985
7.44994	-1.02795	-0.16006	1.264084	0.375797	0.329868	-1.11636	-0.81512	-1.28579	-0.76978	0.002174	0.741647				-0.08565	-0.0242	1.081184	-0.6399	-0.29875	-0.79999	-0.50391	0.002596	-0.79936	-0.94857	-0.85122
7.45814	-0.96447	-0.08152	1.199354	0.307874	0.244747	-1.13118	-0.83614	-1.31364	-0.80146	-0.10809	0.766483				-0.03079	0.002464	0.899132	-0.58747	-0.33693	-0.69553	-0.50771	-0.07166	-0.84528	-0.98551	-0.86691
7.46634	-0.87701	-0.1027	1.20693	0.243659	0.169811	-1.17487	-0.84724	-1.40985	-0.81977	-0.19363	0.784424				-0.05039	0.00385	0.761726	-0.59413	-0.3632	-0.54091	-0.54252	-0.28105	-0.88142	-1.00318	-0.90349
7.47455	-0.79199	-0.19271	1.201329	0.226187	0.116897	-1.21747	-0.85307	-1.50574	-0.82657	-0.21845	0.783609				-0.13449	0.011669	0.726656	-0.64979	-0.3741	-0.30684	-0.59548	-0.53163	-0.89293	-0.99642	-0.94614
7.48275	-0.74206	-0.2914	1.098084	0.255121	0.077853	-1.23546	-0.84507	-1.57246	-0.82458	-0.16671	0.766287				-0.21902	0.045866	0.739946	-0.72382	-0.35929	0.03793	-0.63869	-0.71354	-0.90231	-0.97301	-0.97837
7.49095	-0.72252	-0.34579	0.926853	0.295449	0.042784	-1.22612	-0.79536	-1.61406	-0.818	-0.04742	0.743754				-0.23771	0.102659	0.753581	-0.79042	-0.31773	0.488632	-0.66209	-0.76761	-0.92985	-0.94466	-0.99096
7.49915	-0.69829	-0.3551	0.815276	0.309309	0.007977	-1.20172	-0.68541	-1.64159	-0.82584	0.091437	0.726814				-0.19531	0.142143	0.780121	-0.83575	-0.25385	0.995977	-0.67483	-0.72459	-0.97926	-0.91237	-0.99583
7.50736	-0.64221	-0.34833	0.870254	0.284777	-0.02647	-1.17581	-0.5209	-1.63428	-0.85993	0.193063	0.71293				-0.13426	0.149439	0.853523	-0.875	-0.17606	1.489292	-0.68696	-0.64449	-1.0416	-0.88592	-1.01585
7.51548	-0.55839	-0.34594	1.057116	0.237273	-0.06561	-1.16294	-0.34054	-1.55274	-0.91784	0.235074	0.698712				-0.09473	0.149256	0.952212	-0.92442	-0.10679	1.906422	-0.70649	-0.56485	-1.10689	-0.87999	-1.06119
7.52368	-0.48126	-0.34787	1.238176	0.201684	-0.10998	-1.16217	-0.18236	-1.4191	-0.99062	0.225959	0.682696				-0.08286	0.169456	1.001564	-0.98146	-0.07039	2.21547	-0.71905	-0.48789	-1.15903	-0.89091	-1.11187
7.53188	-0.42688	-0.33997	1.288711	0.195471	-0.15384	-1.16573	-0.05802	-1.31179	-1.06645	0.192103	0.669809				-0.07694	0.215888	0.970731	-1.01652	-0.08522	2.413551	-0.71931	-0.39445	-1.18786	-0.88834	-1.13662
7.54009	-0.39639	-0.32521	1.211266	0.217865	-0.18011	-1.166	0.044569	-1.31208	-1.13581	0.151	0.655252				-0.06348	0.270616	0.901911	-1.00552	-0.14016	2.498357	-0.71528	-0.29803	-1.19321	-0.83577	-1.13231
7.54829	-0.38109	-0.32049	1.10458	0.256874	-0.16941	-1.16336	0.142208	-1.40907	-1.18402	0.11717	0.624805				-0.03844	0.311393	0.843892	-0.96217	-0.19988	2.475644	-0.71317	-0.22758	-1.171	-0.72996	-1.1289
7.5565	-0.37045	-0.33967	1.076481	0.297395	-0.13062	-1.16925	0.230724	-1.52269	-1.20974	0.099434	0.567547				-0.01324	0.32315	0.797594	-0.91275	-0.23715	2.362927	-0.70853	-0.21566	-1.14031	-0.59965	-1.15659
7.5647	-0.35882	-0.37088	1.164728	0.329112	-0.09024	-1.1847	0.294656	-1.58738	-1.22073	0.094534	0.473877				0.017817	0.317717	0.754682	-0.87934	-0.24026	2.198975	-0.69065	-0.27751	-1.12518	-0.48028	-1.20695
7.5729	-0.34378	-0.40224	1.314588	0.335036	-0.08009	-1.20588	0.321777	-1.58295	-1.22831	0.101018	0.351957				0.061357	0.320287	0.730659	-0.87533	-0.2164	2.025636	-0.66147	-0.39027	-1.14267	-0.37404	-1.24963
7.5811	-0.34602	-0.44143	1.448215	0.305457	-0.1059	-1.22393	0.32014	-1.51461	-1.22943	0.102978	0.22803				0.10792	0.356604	0.755342	-0.90532	-0.17842	1.871393	-0.62177	-0.52354	-1.19592	-0.2614	-1.26574
7.58931	-0.37888	-0.49201	1.493164	0.23787	-0.14526	-1.23759	0.304401	-1.39716	-1.20463	0.084992	0.139643				0.155362	0.428045	0.845075	-0.95526	-0.14552	1.743259	-0.57006	-0.64561	-1.25344	-0.14836	-1.26555
7.59751	-0.43057	-0.54967	1.43297	0.153862	-0.18206	-1.25458	0.278554	-1.27037	-1.15641	0.050735	0.105643				0.181096	0.493071	0.957496	-0.99287	-0.12933	1.621858	-0.49932	-0.74447	-1.27371	-0.05971	-1.27539
7.60571	-0.47695	-0.59975	1.306996	0.091227	-0.21413	-1.27439	0.235227	-1.17626	-1.11639	0.022456	0.102525				0.172187	0.50637	1.03402	-0.98799	-0.13236	1.486921	-0.40599	-0.8278	-1.23814	-0.02769	-1.30182
7.61383	-0.48817	-0.64439	1.161086	0.061705	-0.2569	-1.29028	0.16841	-1.14823	-1.10828	0.019398	0.096856				0.136969	0.456561	1.034805	-0.94181	-0.14553	1.336416	-0.29235	-0.90279	-1.16523	-0.05884	-1.33467
7.62204	-0.45861	-0.69864	1.05241	0.06707	-0.31819	-1.29175	0.092334	-1.19116	-1.12525	0.038818	0.068439				0.084013	0.391774	0.967223	-0.8899	-0.15771	1.182457	-0.16619	-0.97427	-1.07967	-0.13266	-1.36341
7.63024	-0.39177	-0.76247	0.990349	0.110326	-0.38473	-1.2829	0.029815	-1.27314	-1.14315	0.064164	0.030167				0.01378	0.370279	0.875949	-0.85271	-0.17073	1.043841	-0.04292	-1.04496	-0.98606	-0.21254	-1.39141
7.63844	-0.31499	-0.79949	0.947036	0.204005	-0.43752	-1.27247	-0.01111	-1.34363	-1.14848	0.089339	0.008664				-0.0786	0.413755	0.790082	-0.83345	-0.1844	0.931365	0.060961	-1.13675	-0.87895	-0.25302	-1.42816
7.64665	-0.27091	-0.76924	0.915959	0.345477	-0.46676	-1.26556	-0.04524	-1.35205	-1.15222	0.135926	0.003824				-0.16459	0.492245	0.727399	-0.8252	-0.19212	0.858265	0.122785	-1.25961	-0.75263	-0.24073	-1.46134
7.65485	-0.29732	-0.686	0.921406	0.469052	-0.48404	-1.25931	-0.09762	-1.28467	-1.17664	0.21124	-0.00884				-0.21213	0.547459	0.6748	-0.81938	-0.18066	0.824146	0.134912	-1.39563	-0.61117	-0.19475	-1.46043
7.66305	-0.39949	-0.60103	0.979193	0.492246	-0.48962	-1.24902	-0.17076	-1.16343	-1.21828	0.289691	-0.05309				-0.21671	0.556289	0.636868	-0.81571	-0.15342	0.803783	0.107368	-1.50471	-0.46489	-0.15269	-1.39158
7.67126	-0.53107	-0.56736	1.035174	0.389475	-0.4739	-1.23964	-0.24841	-1.02081	-1.25784	0.329144	-0.12785				-0.20545	0.511436	0.651754	-0.80936	-0.14236	0.755939	0.056898	-1.55328	-0.32625	-0.14009	-1.25887
7.67946	-0.64091	-0.58172	1.020469	0.230098	-0.43474	-1.23372	-0.31095	-0.87135	-1.28604	0.312972	-0.21953				-0.20809	0.410387	0.734443	-0.80733	-0.16707	0.661456	-0.00069	-1.54084	-0.21952	-0.15154	-1.11426
7.68766	-0.70588	-0.58532	0.916391	0.118783	-0.38533	-1.22645	-0.35309	-0.69455	-1.31167	0.269633	-0.31487				-0.21431	0.263044	0.862025	-0.81975	-0.21975	0.545022	-0.05688	-1.49516	-0.15528	-0.17653	-1.01344
7.69587	-0.72958	-0.53361	0.770188	0.100252	-0.35182	-1.20513	-0.38903	-0.51155	-1.34886	0.233278	-0.40588				-0.2	0.103807	0.973827	-0.84709	-0.26952	0.449934	-0.10245	-1.4491	-0.13008	-0.2085	-0.97659
7.70399	-0.72651	-0.42077	0.640789	0.141196	-0.3513	-1.16779	-0.43174	-0.38597	-1.39204	0.217856	-0.48291				-0.16725	-0.01101	1.030883	-0.87208	-0.29506	0.400367	-0.12944	-1.40595	-0.122	-0.24388	-0.97696
7.71219	-0.70823	-0.28394	0.525231	0.174089	-0.38137	-1.12891	-0.4845	-0.3633	-1.42519	0.210846	-0.52381				-0.16029	-0.0466	1.022766	-0.86186	-0.30514	0.376456	-0.13684	-1.3796	-0.11874	-0.26038	-0.97675
7.72039	-0.67718	-0.16083	0.394628	0.16855	-0.4167	-1.09815	-0.54641	-0.4233	-1.42801	0.189834	-0.51673				-0.217	-0.01347	0.948608	-0.81687	-0.30303	0.351225	-0.14396	-1.39906	-0.11969	-0.23194	-0.94621
7.7286	-0.62782	-0.07142	0.249953	0.13821	-0.44331	-1.07157	-0.61559	-0.48604	-1.40192	0.149086	-0.47209				-0.33168	0.04471	0.83865	-0.75132	-0.27976	0.3177	-0.18269	-1.46611	-0.12945	-0.15657	-0.87848
7.7368	-0.5743	-0.02164	0.169267	0.114728	-0.45608	-1.03212	-0.68032	-0.49837	-1.37044	0.092502	-0.41798				-0.45663	0.085267	0.756085	-0.67738	-0.22826	0.287108	-0.26384	-1.55941	-0.14985	-0.04723	-0.78751
7.745	-0.53714	-0.0064	0.217148	0.116693	-0.454	-0.9761	-0.71848	-0.45006	-1.34786	0.048676	-0.3777				-0.53653	0.084395	0.772059	-0.61024	-0.1721	0.259701	-0.36199	-1.63768	-0.18012	0.089074	-0.69687
7.75321	-0.53102	-0.0312	0.395184	0.147062	-0.4443	-0.92408	-0.72132	-0.38449	-1.33862	0.027552	-0.35841				-0.55053	0.024344	0.879223	-0.56708	-0.15045	0.217004	-0.44378	-1.68288	-0.22033	0.259162	-0.6332
7.76141	-0.56092	-0.08548	0.631855	0.202156	-0.43803	-0.89774	-0.7027	-0.36633	-1.33428	0.00462	-0.35662				-0.49288	-0.08938	0.979096	-0.565	-0.17588	0.159988	-0.48659	-1.69153	-0.24866	0.45365	-0.60805
7.76961	-0.61075	-0.14625	0.811866	0.256537	-0.45006	-0.90626	-0.69056	-0.4393	-1.32942	-0.04297	-0.3561				-0.37956	-0.22263	0.981917	-0.60016	-0.23163	0.103881	-0.49526	-1.65725	-0.24472	0.650955	-0.61392
7.77782	-0.66986	-0.18953	0.867323	0.291076	-0.47536	-0.93811	-0.70584	-0.61218	-1.32814	-0.09916	-0.35392				-0.23809	-0.31683	0.920994	-0.6498	-0.28612	0.070719	-0.48773	-1.57385	-0.21014	0.813768	-0.63012
7.78602	-0.71783	-0.21662	0.805616	0.310253	-0.49739	-0.97769	-0.74832	-0.82977	-1.33709	-0.10688	-0.35925				-0.08384	-0.3312	0.926965	-0.68361	-0.31161	0.056916	-0.47715	-1.44189	-0.15491	0.919794	-0.64721
7.79414	-0.72196	-0.2347	0.720502	0.341961	-0.5038	-1.01667	-0.8052	-0.99756	-1.36319	-0.02854	-0.37953				0.053633	-0.27868	1.068128	-0.69356	-0.28701	0.036531	-0.46521	-1.32426	-0.09622	0.97549	-0.66755
7.80234	-0.6481	-0.22941	0.698684	0.391699	-0.49578	-1.05124	-0.85891	-1.04159	-1.39266	0.109469	-0.41016				0.160549	-0.20576	1.288511	-0.68928	-0.20998	-0.0054	-0.45245	-1.29788	-0.0341	0.998694	-0.68797
7.81055	-0.51129	-0.18563	0.734883	0.429755	-0.4974	-1.08207	-0.89616	-0.97537	-1.4081	0.228675	-0.42686				0.226158	-0.1582	1.438547	-0.68034	-0.11086	-0.07266	-0.45218	-1.38521	0.033639	1.014087	-0.7011
7.81875	-0.39801	-0.10498	0.748169	0.433973	-0.52751	-1.10957	-0.90956	-0.88666	-1.41496	0.269285	-0.41953				0.25311	-0.13846	1.439387	-0.67745	-0.03774	-0.14179	-0.47755	-1.53574	0.103379	1.023133	-0.70164
7.82695	-0.37121	-0.01939	0.642888	0.399376	-0.58851	-1.13332	-0.90953	-0.87294	-1.44659	0.246405	-0.40096				0.263474	-0.13573	1.324999	-0.67608	-0.01361	-0.18992	-0.52913	-1.65435	0.169202	1.006955	-0.69954
7.83515	-0.42034	0.034309	0.432078	0.349512	-0.65444	-1.14675	-0.91304	-0.98298	-1.52751	0.223479	-0.39528				0.279814	-0.14703	1.170188	-0.67208	-0.00067	-0.21062	-0.58295	-1.67257	0.231185	0.959737	-0.71198
7.84336	-0.4793	0.037747	0.207596	0.30668	-0.6835	-1.13976	-0.92722	-1.16737	-1.64018	0.265293	-0.40502				0.326185	-0.18361	1.045605	-0.66056	0.053631	-0.22201	-0.61481	-1.59222	0.292734	0.895681	-0.74003
7.85156	-0.48677	-0.00598	0.06701	0.268827	-0.65596	-1.10767	-0.94703	-1.32598	-1.74276	0.398309	-0.40223				0.404007	-0.25427	0.965971	-0.64677	0.170209	-0.24979	-0.62038	-1.48325	0.335457	0.848483	-0.76913
7.85977	-0.44499	-0.08041	0.05715	0.242417	-0.58911	-1.05794	-0.95552	-1.37648	-1.78974	0.612512	-0.36987				0.514881	-0.3224	0.933638	-0.6447	0.321176	-0.30358	-0.60782	-1.42055	0.331196	0.830736	-0.77579
7.86797	-0.39823	-0.17247	0.145273	0.235983	-0.52899	-1.01381	-0.94935	-1.3238	-1.77673	0.876111	-0.31636				0.650001	-0.34555	0.957619	-0.64835	0.459781	-0.37539	-0.59067	-1.43936	0.262771	0.832109	-0.75916
7.87617	-0.38158	-0.26146	0.273422	0.251095	-0.50281	-0.99519	-0.93508	-1.25626	-1.72365	1.158854	-0.26404				0.781141	-0.30459	1.058043	-0.6427	0.555291	-0.44386	-0.5659	-1.5208	0.145221	0.841659	-0.74103
7.88429	-0.39103	-0.33492	0.372377	0.276128	-0.50695	-1.00987	-0.92406	-1.25245	-1.65271	1.447772	-0.21482				0.872044	-0.23728	1.232583	-0.61096	0.598856	-0.49391	-0.53019	-1.60509	0.021494	0.875406	-0.7455
7.89249	-0.41104	-0.39448	0.400291	0.300082	-0.5339	-1.04702	-0.93087	-1.31316	-1.57794	1.727872	-0.15199				0.897902	-0.21646	1.41685	-0.56262	0.603391	-0.51533	-0.48685	-1.6543	-0.07112	0.963071	-0.78684
7.9007	-0.41629	-0.42527	0.361838	0.313046	-0.59726	-1.0854	-0.96611	-1.35367	-1.5111	1.977272	-0.06755				0.881009	-0.27739	1.532986	-0.51759	0.586275	-0.50445	-0.45364	-1.66821	-0.12578	1.096222	-0.85887
7.9089	-0.38774	-0.41205	0.292818	0.305803	-0.70663	-1.10533	-1.03292	-1.32425	-1.47185	2.156882	0.023602				0.852704	-0.39847	1.516049	-0.48685	0.55768	-0.46353	-0.44719	-1.66922	-0.17041	1.22117	-0.93356
7.9171	-0.33915	-0.34955	0.219663	0.281088	-0.83094	-1.09814	-1.11386	-1.26611	-1.47021	2.232723	0.092541				0.817396	-0.51749	1.38848	-0.48924	0.520846	-0.41263	-0.45497	-1.66435	-0.22745	1.278892	-0.97375
7.92531	-0.29651	-0.26291	0.144069	0.25018	-0.92066	-1.07932	-1.18214	-1.25249	-1.51107	2.208521	0.127322				0.75217	-0.58888	1.239696	-0.53463	0.469228	-0.38254	-0.45645	-1.64726	-0.30438	1.257087	-0.96489
7.93351	-0.27582	-0.19562	0.080666	0.236609	-0.94463	-1.06447	-1.21941	-1.31808	-1.59069	2.119068	0.139399				0.660557	-0.59899	1.121951	-0.62223	0.41756	-0.38231	-0.42901	-1.62661	-0.39371	1.199927	-0.92418
7.94171	-0.26206	-0.18052	0.02973	0.258636	-0.91874	-1.06084	-1.22293	-1.42135	-1.69922	2.010358	0.149045				0.57545	-0.54544	1.008209	-0.72777	0.3875	-0.40129	-0.37596	-1.61091	-0.48809	1.170893	-0.88624
7.94992	-0.25319	-0.22365	-0.02849	0.304888	-0.8824	-1.06398	-1.20463	-1.50555	-1.81751	1.905424	0.165504				0.521321	-0.44615	0.845735	-0.80194	0.391658	-0.42376	-0.31288	-1.61812	-0.58154	1.205483	-0.8805
7.95812	-0.27172	-0.29424	-0.12511	0.331472	-0.85177	-1.06297	-1.17761	-1.55575	-1.91169	1.813524	0.195246				0.504135	-0.33956	0.642976	-0.80789	0.431335	-0.44291	-0.24898	-1.63733	-0.65037	1.295926	-0.91025
7.96632	-0.34764	-0.35425	-0.25643	0.298917	-0.81994	-1.06073	-1.15576	-1.59533	-1.95554	1.748594	0.252065				0.496184	-0.28076	0.460786	-0.74874	0.493452	-0.46208	-0.19088	-1.6503	-0.67369	1.409847	-0.96336
7.97445	-0.48873	-0.38182	-0.35279	0.220427	-0.78409	-1.06442	-1.14858	-1.64366	-1.94153	1.703374	0.331407				0.472525	-0.30049	0.364835	-0.6571	0.560103	-0.47599	-0.14171	-1.6578	-0.64842	1.508663	-1.02266
7.98265	-0.64543	-0.3787	-0.35615	0.13954	-0.76591	-1.08053	-1.15834	-1.69854	-1.88152	1.649401	0.407393				0.427463	-0.37599	0.355052	-0.56036	0.60804	-0.48187	-0.1101	-1.65844	-0.59778	1.568058	-1.07581
7.99085	-0.75587	-0.36318	-0.25896	0.102669	-0.7835	-1.10448	-1.1782	-1.769	-1.80494	1.558409	0.438504				0.358516	-0.44399	0.384867	-0.48099	0.621836	-0.48801	-0.10165	-1.65241	-0.56612	1.586282	-1.11003
7.99905	-0.78274	-0.34406	-0.11294	0.108785	-0.82106	-1.13255	-1.19994	-1.85719	-1.73661	1.440624	0.400189				0.28057	-0.46024	0.423969	-0.44095	0.596269	-0.50835	-0.1239	-1.63941	-0.5846	1.56798	-1.11465
8.00726	-0.7348	-0.31947	0.01788	0.128925	-0.84605	-1.16491	-1.22152	-1.94202	-1.68336	1.331178	0.319702				0.208893	-0.43254	0.451486	-0.4685	0.545937	-0.54483	-0.17206	-1.63477	-0.65674	1.521435	-1.09757
8.01546	-0.65453	-0.28921	0.099707	0.162694	-0.82781	-1.19873	-1.24212	-1.97966	-1.62452	1.252707	0.258511				0.169954	-0.38701	0.481809	-0.56607	0.489834	-0.57433	-0.22916	-1.64852	-0.7463	1.435162	-1.07196
8.02366	-0.57372	-0.27228	0.108456	0.210372	-0.77445	-1.22748	-1.26794	-1.93661	-1.53719	1.191881	0.266574				0.193422	-0.35783	0.546584	-0.68763	0.432785	-0.57517	-0.27013	-1.66105	-0.81271	1.299122	-1.05599
8.03187	-0.51615	-0.28987	0.07042	0.260938	-0.71369	-1.23666	-1.29688	-1.84353	-1.41219	1.113779	0.332628				0.27404	-0.35333	0.662307	-0.77449	0.378537	-0.55241	-0.2755	-1.6557	-0.84741	1.1274	-1.05853
8.04007	-0.48817	-0.35291	0.026197	0.27632	-0.66047	-1.21683	-1.32068	-1.77256	-1.25082	1.010508	0.410678				0.361448	-0.36204	0.807129	-0.79393	0.336799	-0.53257	-0.24694	-1.62986	-0.87096	0.948089	-1.07412
8.04827	-0.49378	-0.45427	0.015426	0.225494	-0.61603	-1.176	-1.3328	-1.77919	-1.08044	0.899332	0.462053				0.379525	-0.3686	0.912258	-0.77276	0.325703	-0.53845	-0.19829	-1.60276	-0.90636	0.804892	-1.0881
8.05648	-0.54453	-0.5528	0.048401	0.129657	-0.57856	-1.13794	-1.33368	-1.82429	-0.93312	0.801849	0.484338				0.310104	-0.35228	0.943393	-0.75753	0.351562	-0.56121	-0.14738	-1.5905	-0.94501	0.719109	-1.07559
8.0646	-0.64293	-0.61948	0.104012	0.036374	-0.5524	-1.12634	-1.3334	-1.82833	-0.83858	0.726976	0.500777				0.209807	-0.31311	0.926718	-0.76776	0.41397	-0.57967	-0.09573	-1.57809	-0.96403	0.689755	-1.02574
8.0728	-0.77498	-0.6596	0.181997	-0.01204	-0.53753	-1.14263	-1.33969	-1.76159	-0.8061	0.672384	0.518109				0.152678	-0.25648	0.929084	-0.79759	0.508059	-0.58765	-0.03756	-1.53488	-0.96042	0.692644	-0.94169
8.081	-0.89893	-0.71082	0.27208	-0.01965	-0.53246	-1.16689	-1.354	-1.6794	-0.82294	0.623797	0.52208				0.155937	-0.19481	0.985384	-0.81519	0.615588	-0.60109	0.030769	-1.46087	-0.95693	0.691265	-0.83756
8.08921	-0.97344	-0.79155	0.352025	-0.00768	-0.53493	-1.17966	-1.37181	-1.66335	-0.85668	0.558367	0.500215				0.170721	-0.14572	1.071265	-0.7984	0.729195	-0.64073	0.106748	-1.40407	-0.96773	0.660557	-0.73499
8.09741	-0.97876	-0.87558	0.406247	0.012439	-0.54097	-1.17784	-1.38926	-1.70828	-0.88517	0.479417	0.461008				0.15676	-0.13047	1.171523	-0.74891	0.845361	-0.70572	0.175648	-1.39226	-0.97885	0.591789	-0.6548
8.10561	-0.93884	-0.93495	0.429393	0.031009	-0.55159	-1.1711	-1.41008	-1.75826	-0.91517	0.410212	0.418498				0.121069	-0.17869	1.278013	-0.70012	0.975992	-0.77248	0.225734	-1.41288	-0.9684	0.504457	-0.61172
8.11382	-0.90129	-0.95339	0.421461	0.040332	-0.56815	-1.17026	-1.43608	-1.77594	-0.95406	0.375594	0.37973				0.108348	-0.28467	1.388412	-0.69637	1.143712	-0.80983	0.25798	-1.42025	-0.92632	0.428551	-0.59193
8.12202	-0.89055	-0.9473	0.373488	0.0294	-0.59204	-1.18231	-1.46764	-1.77725	-1.00323	0.368248	0.353263				0.136642	-0.40479	1.496567	-0.73539	1.348322	-0.81554	0.276117	-1.3956	-0.86628	0.38762	-0.57027
8.13022	-0.90553	-0.92363	0.290859	0.008047	-0.61637	-1.2018	-1.49987	-1.81029	-1.04731	0.347532	0.345811				0.189768	-0.4704	1.604654	-0.78288	1.567013	-0.80481	0.272121	-1.36716	-0.79709	0.393595	-0.53804
8.13843	-0.925	-0.86126	0.199248	-0.00116	-0.63143	-1.22977	-1.51938	-1.87981	-1.07097	0.291803	0.358484				0.23324	-0.44989	1.745211	-0.81073	1.760614	-0.79974	0.236391	-1.35375	-0.72527	0.441029	-0.51025
8.14663	-0.93391	-0.74954	0.155905	0.013142	-0.63261	-1.26835	-1.5157	-1.94955	-1.08492	0.209715	0.37675				0.239781	-0.38408	1.931005	-0.82592	1.908396	-0.81357	0.184434	-1.34142	-0.66176	0.509974	-0.50711
8.15483	-0.91134	-0.62423	0.193724	0.022061	-0.63791	-1.31191	-1.4877	-1.9661	-1.09983	0.132454	0.381594				0.212525	-0.35064	2.111778	-0.85567	2.015108	-0.84681	0.150953	-1.29811	-0.61367	0.567323	-0.52659
8.16295	-0.84703	-0.55696	0.277758	-0.01347	-0.67716	-1.34761	-1.44703	-1.89607	-1.10804	0.078704	0.359943				0.148043	-0.38216	2.202901	-0.91442	2.076976	-0.89302	0.153151	-1.23583	-0.59188	0.598096	-0.5473
8.17116	-0.75638	-0.57931	0.32979	-0.09269	-0.75672	-1.36214	-1.40629	-1.74438	-1.07758	0.039568	0.305246				0.046551	-0.4262	2.185235	-0.98951	2.095698	-0.93768	0.180622	-1.20116	-0.58745	0.613783	-0.55184
8.17936	-0.66495	-0.65621	0.291368	-0.18077	-0.8473	-1.35778	-1.37418	-1.54465	-0.98701	0.00345	0.228721				-0.09081	-0.40937	2.113952	-1.04073	2.081696	-0.97162	0.205174	-1.22526	-0.58038	0.646275	-0.5422
8.18756	-0.60284	-0.72035	0.187012	-0.22419	-0.89343	-1.3477	-1.35088	-1.35838	-0.8484	-0.03276	0.151467				-0.24225	-0.32011	2.088953	-1.03124	2.060812	-0.98812	0.210717	-1.29991	-0.56369	0.714233	-0.53532
8.19577	-0.56306	-0.72731	0.088042	-0.20607	-0.85882	-1.34264	-1.33655	-1.22585	-0.6956	-0.05664	0.101232				-0.34683	-0.23372	2.171022	-0.95973	2.04934	-0.99209	0.206608	-1.35852	-0.54412	0.803598	-0.54895
8.20397	-0.52333	-0.69505	0.05678	-0.13837	-0.76075	-1.341	-1.33231	-1.15007	-0.56182	-0.06299	0.08813				-0.36891	-0.23364	2.318926	-0.86538	2.042218	-0.99733	0.197699	-1.34759	-0.54579	0.882654	-0.59344
8.21217	-0.48079	-0.67861	0.079894	-0.05319	-0.65718	-1.3315	-1.33396	-1.09508	-0.44952	-0.06515	0.090037				-0.31463	-0.31641	2.464738	-0.80076	2.019742	-1.00323	0.170616	-1.27699	-0.57997	0.914421	-0.65818
8.22037	-0.43776	-0.72127	0.090742	0.003221	-0.61342	-1.31422	-1.33483	-1.04533	-0.348	-0.08154	0.083992				-0.2417	-0.40478	2.544579	-0.78527	1.970214	-1.00491	0.107363	-1.21206	-0.64627	0.893021	-0.72213
8.22858	-0.40096	-0.82058	0.078845	0.016291	-0.64342	-1.29639	-1.32868	-1.02962	-0.25277	-0.12473	0.059275				-0.20561	-0.43271	2.527298	-0.79098	1.908588	-0.99807	0.019169	-1.21199	-0.71627	0.837142	-0.75906
8.23678	-0.35794	-0.93099	0.077333	-0.00427	-0.71439	-1.28486	-1.32018	-1.07823	-0.17407	-0.1838	0.027306				-0.22369	-0.41612	2.430782	-0.77042	1.853174	-0.99096	-0.05778	-1.26626	-0.75599	0.76519	-0.75776
8.24498	-0.2982	-1.00215	0.122127	-0.02776	-0.79359	-1.27953	-1.31837	-1.17573	-0.12614	-0.23859	0.004301				-0.29056	-0.40334	2.312762	-0.71887	1.814052	-0.98986	-0.08631	-1.31357	-0.75421	0.684487	-0.72425
8.25311	-0.22028	-1.01164	0.187568	-0.03525	-0.86985	-1.27909	-1.32165	-1.25412	-0.10522	-0.27757	-0.00661				-0.3741	-0.39381	2.25338	-0.66112	1.781767	-0.98653	-0.06252	-1.28847	-0.7252	0.590743	-0.66214
8.26131	-0.13613	-0.98158	0.219509	-0.03726	-0.94179	-1.28973	-1.31829	-1.27062	-0.08924	-0.31273	-0.01433				-0.43586	-0.34501	2.257412	-0.62699	1.74381	-0.96993	-0.02704	-1.18779	-0.7018	0.501424	-0.58051
8.26951	-0.06302	-0.93688	0.208167	-0.03379	-0.9915	-1.3152	-1.29242	-1.22993	-0.05138	-0.35597	-0.0388				-0.44165	-0.22272	2.267731	-0.64173	1.68861	-0.93844	-0.02619	-1.05619	-0.70732	0.444656	-0.50724
8.27772	0.004148	-0.89248	0.171705	-0.00606	-1.00045	-1.35105	-1.25352	-1.17034	0.013684	-0.40602	-0.0946				-0.39068	-0.08596	2.206946	-0.70201	1.605937	-0.90699	-0.08696	-0.94171	-0.74773	0.436414	-0.47503
8.28592	0.065935	-0.85865	0.129873	0.068813	-0.96667	-1.37938	-1.22585	-1.12509	0.092736	-0.45898	-0.179				-0.33783	-0.03603	2.05984	-0.78033	1.519369	-0.88243	-0.18529	-0.87911	-0.81461	0.473795	-0.49004
8.29412	0.116805	-0.85584	0.080296	0.170901	-0.91355	-1.38868	-1.22347	-1.08069	0.170545	-0.50898	-0.26416				-0.36264	-0.11206	1.909115	-0.83074	1.46608	-0.86022	-0.28064	-0.87648	-0.88783	0.544649	-0.52703
8.30232	0.13095	-0.88803	0.004764	0.251846	-0.87469	-1.37528	-1.24013	-1.01405	0.258818	-0.56069	-0.31922				-0.50099	-0.2597	1.810756	-0.82238	1.473565	-0.83308	-0.33849	-0.90427	-0.93319	0.654949	-0.56016
8.31053	0.075026	-0.90379	-0.11456	0.293378	-0.86511	-1.34427	-1.25379	-0.90622	0.395184	-0.61085	-0.34143				-0.68873	-0.38386	1.746242	-0.76338	1.517144	-0.8047	-0.35606	-0.89795	-0.92772	0.804781	-0.57976
8.31873	-0.04842	-0.85285	-0.26738	0.320087	-0.88391	-1.30668	-1.25887	-0.7747	0.588631	-0.65916	-0.35634				-0.82285	-0.44021	1.659426	-0.69039	1.53598	-0.78551	-0.35623	-0.83204	-0.88822	0.976941	-0.59361
8.32693	-0.18022	-0.73543	-0.393	0.369354	-0.91943	-1.26786	-1.26623	-0.67613	0.821084	-0.70813	-0.38619				-0.85583	-0.43942	1.541709	-0.65167	1.493041	-0.7836	-0.36066	-0.7343	-0.86157	1.135753	-0.60535
8.33514	-0.24486	-0.61257	-0.4375	0.444414	-0.95736	-1.23505	-1.29144	-0.65802	1.060738	-0.74843	-0.42917				-0.84057	-0.41344	1.443102	-0.65557	1.389335	-0.80528	-0.38956	-0.65337	-0.89112	1.259623	-0.60592
8.34326	-0.22943	-0.55049	-0.38769	0.520727	-0.98475	-1.21065	-1.32988	-0.72292	1.283115	-0.76494	-0.47721				-0.86264	-0.3865	1.38716	-0.67872	1.277918	-0.84156	-0.43859	-0.63422	-0.98047	1.354354	-0.59091
8.35146	-0.17206	-0.55487	-0.28428	0.577641	-1.00316	-1.19834	-1.35727	-0.81375	1.485553	-0.74451	-0.52506				-0.92885	-0.35971	1.345031	-0.70024	1.201436	-0.87832	-0.49168	-0.64775	-1.09751	1.430051	-0.57188
8.35967	-0.13615	-0.59489	-0.20288	0.614694	-1.02666	-1.19575	-1.35388	-0.88797	1.679722	-0.70354	-0.56853				-0.95933	-0.3357	1.29118	-0.7246	1.158048	-0.90379	-0.53025	-0.64399	-1.21006	1.487387	-0.57236
8.36787	-0.1544	-0.64412	-0.21098	0.64279	-1.05514	-1.194	-1.3152	-0.94124	1.884197	-0.67763	-0.59812				-0.86316	-0.31728	1.25278	-0.77393	1.128294	-0.90803	-0.54302	-0.61796	-1.29798	1.511892	-0.60264
8.37607	-0.19843	-0.69953	-0.32802	0.657585	-1.07563	-1.18906	-1.25537	-0.98467	2.105289	-0.68929	-0.60137				-0.65213	-0.31338	1.256523	-0.847	1.100787	-0.89832	-0.53811	-0.60624	-1.36616	1.495179	-0.65898
8.38427	-0.22652	-0.75147	-0.48571	0.656111	-1.07123	-1.17874	-1.19006	-1.02578	2.336038	-0.73351	-0.59184				-0.39845	-0.33201	1.270116	-0.91067	1.085142	-0.88943	-0.52517	-0.63601	-1.42403	1.430345	-0.71756
8.39248	-0.21352	-0.77164	-0.60109	0.643118	-1.04715	-1.17331	-1.12916	-1.05747	2.556803	-0.777	-0.60568				-0.16994	-0.37359	1.238802	-0.9407	1.085789	-0.89042	-0.51401	-0.69055	-1.4733	1.327941	-0.74863
8.40068	-0.16702	-0.73886	-0.61981	0.640209	-1.02482	-1.18082	-1.07431	-1.08035	2.754063	-0.79401	-0.67378				0.002266	-0.41054	1.172417	-0.9618	1.092897	-0.90186	-0.50959	-0.7574	-1.50757	1.221471	-0.73835
8.40888	-0.11213	-0.6599	-0.55726	0.652152	-1.02221	-1.19499	-1.02834	-1.10395	2.910367	-0.77068	-0.78709				0.140285	-0.39962	1.150238	-1.00435	1.079306	-0.91703	-0.52152	-0.83817	-1.51073	1.131949	-0.70208
8.41709	-0.07389	-0.58916	-0.46574	0.657469	-1.0479	-1.20099	-0.99911	-1.14225	3.001635	-0.69359	-0.89582				0.262109	-0.32681	1.205451	-1.06202	1.032131	-0.93122	-0.55276	-0.9423	-1.48668	1.066874	-0.67828
8.42529	-0.05601	-0.57555	-0.36956	0.642029	-1.08181	-1.18224	-0.98734	-1.19623	2.997628	-0.56395	-0.95749				0.366218	-0.21287	1.290066	-1.09374	0.978849	-0.93974	-0.59428	-1.05606	-1.45598	1.00455	-0.69361
8.43341	-0.02008	-0.62087	-0.28193	0.599438	-1.10054	-1.13806	-0.98648	-1.27332	2.886852	-0.4089	-0.96029				0.443589	-0.11291	1.319	-1.05573	0.951704	-0.9419	-0.63252	-1.11992	-1.42786	0.923833	-0.75287
8.44161	0.055469	-0.6623	-0.19805	0.551587	-1.0942	-1.07971	-0.98413	-1.38025	2.698302	-0.26747	-0.92608				0.489892	-0.07064	1.262356	-0.9475	0.962408	-0.93958	-0.65174	-1.10621	-1.38591	0.819429	-0.83763
8.44982	0.161246	-0.63296	-0.12038	0.514736	-1.06675	-1.03065	-0.97884	-1.48614	2.484801	-0.15291	-0.88717				0.511329	-0.09883	1.177343	-0.80456	0.97393	-0.92812	-0.65977	-1.04883	-1.31036	0.693428	-0.91515
8.45802	0.262731	-0.5241	-0.03461	0.476738	-1.03282	-1.01503	-0.98326	-1.54251	2.283242	-0.04453	-0.86496				0.518095	-0.18452	1.124689	-0.66628	0.940338	-0.90754	-0.66893	-1.01337	-1.213	0.565062	-0.96951
8.46622	0.315173	-0.38853	0.069649	0.428734	-0.99932	-1.04351	-1.01246	-1.50402	2.103301	0.094962	-0.86951				0.531357	-0.28109	1.121456	-0.56619	0.845688	-0.88154	-0.68001	-1.03165	-1.1268	0.458932	-1.00815
8.47443	0.299192	-0.31491	0.141801	0.38201	-0.9713	-1.10674	-1.06726	-1.37095	1.927949	0.26837	-0.9028				0.554914	-0.34514	1.130233	-0.51869	0.721519	-0.86534	-0.67695	-1.10209	-1.07541	0.404393	-1.05338
8.48263	0.227118	-0.35984	0.114104	0.377589	-0.95876	-1.1827	-1.12335	-1.20784	1.73812	0.433191	-0.96471				0.574502	-0.35424	1.109609	-0.5383	0.618744	-0.8691	-0.65266	-1.20222	-1.0498	0.418119	-1.10682
8.49083	0.135562	-0.51996	-0.03275	0.432191	-0.97941	-1.25301	-1.15381	-1.09109	1.522224	0.562234	-1.04239				0.584201	-0.32429	1.057671	-0.60995	0.552953	-0.88128	-0.62705	-1.30147	-1.03136	0.483887	-1.14152
8.49904	0.053465	-0.72929	-0.22874	0.520457	-1.03912	-1.30143	-1.15098	-1.06284	1.305794	0.660132	-1.11883				0.578461	-0.28339	1.017758	-0.6964	0.517072	-0.87294	-0.62805	-1.37786	-1.02754	0.561617	-1.13304
8.50724	-0.00723	-0.88735	-0.37967	0.600025	-1.11486	-1.31367	-1.12927	-1.08894	1.128988	0.767493	-1.17387				0.569383	-0.24083	1.061592	-0.75289	0.500325	-0.82928	-0.66939	-1.42137	-1.04818	0.597299	-1.08883
8.51544	-0.05494	-0.93757	-0.43752	0.647442	-1.17049	-1.27689	-1.11695	-1.12056	1.006735	0.903535	-1.18637				0.579724	-0.20382	1.189863	-0.75699	0.510326	-0.77515	-0.73899	-1.45908	-1.08167	0.567983	-1.054
8.52356	-0.10335	-0.88601	-0.4059	0.670405	-1.18152	-1.19546	-1.13087	-1.1321	0.919608	1.04733	-1.14621				0.617276	-0.17968	1.320376	-0.73092	0.56188	-0.74628	-0.81578	-1.52132	-1.0912	0.486998	-1.06458
8.53177	-0.14271	-0.79519	-0.32484	0.67393	-1.15583	-1.10464	-1.17033	-1.12772	0.831481	1.152363	-1.06543				0.650204	-0.18892	1.352818	-0.70119	0.64235	-0.75642	-0.87965	-1.62208	-1.06384	0.392039	-1.11234
8.53997	-0.1561	-0.71926	-0.24714	0.665203	-1.108	-1.0444	-1.22036	-1.14039	0.749537	1.1754	-0.97875				0.648152	-0.23046	1.265521	-0.67437	0.723779	-0.78266	-0.91695	-1.74778	-1.00985	0.314734	-1.16553
8.54817	-0.15122	-0.66201	-0.22979	0.64934	-1.05504	-1.03387	-1.26204	-1.1909	0.720365	1.116337	-0.91952				0.610837	-0.27019	1.149399	-0.62935	0.782285	-0.80209	-0.92317	-1.85031	-0.94764	0.263182	-1.20059
8.55638	-0.17122	-0.61533	-0.2721	0.643339	-1.0079	-1.06391	-1.2879	-1.29421	0.753689	1.002208	-0.90815				0.569755	-0.27889	1.121015	-0.55336	0.815493	-0.81034	-0.90451	-1.89062	-0.89534	0.235697	-1.21974
8.56458	-0.23724	-0.58478	-0.31046	0.645131	-0.96724	-1.10962	-1.30168	-1.43263	0.801545	0.889645	-0.93396				0.574773	-0.24786	1.196893	-0.4768	0.828202	-0.81223	-0.86888	-1.8511	-0.86791	0.233788	-1.23099
8.57278	-0.32674	-0.59653	-0.27258	0.628381	-0.9325	-1.15504	-1.31332	-1.55239	0.799381	0.84067	-0.96085				0.620817	-0.18176	1.287493	-0.43041	0.81995	-0.81289	-0.83072	-1.75742	-0.88933	0.257071	-1.2368
8.58098	-0.40149	-0.64425	-0.15715	0.587918	-0.89947	-1.18868	-1.32783	-1.61957	0.749603	0.877978	-0.97133				0.660072	-0.09169	1.322935	-0.41277	0.797453	-0.79659	-0.79602	-1.66247	-0.95473	0.279889	-1.23285
8.58919	-0.43999	-0.68764	-0.0728	0.542283	-0.87301	-1.20122	-1.34263	-1.63286	0.706634	0.976034	-0.97447				0.664086	-0.00063	1.321655	-0.39496	0.769746	-0.75784	-0.76671	-1.61142	-1.03272	0.273052	-1.22582
8.59739	-0.4627	-0.68818	-0.11137	0.518377	-0.85599	-1.18094	-1.35166	-1.61966	0.706416	1.066796	-0.9938				0.638364	0.070748	1.344164	-0.37206	0.74811	-0.70622	-0.75108	-1.62782	-1.0831	0.2262	-1.22241
8.60559	-0.48993	-0.65557	-0.26883	0.509101	-0.84287	-1.13091	-1.34912	-1.60148	0.725584	1.097692	-1.03312				0.605841	0.096822	1.409311	-0.36542	0.730674	-0.66066	-0.76206	-1.68368	-1.07148	0.159444	-1.22007
8.61372	-0.51298	-0.62869	-0.44673	0.492631	-0.82377	-1.07648	-1.33506	-1.58008	0.709871	1.070117	-1.07328				0.5592	0.067691	1.46645	-0.39707	0.705042	-0.63484	-0.80551	-1.73251	-0.99014	0.120697	-1.2082
8.62192	-0.50504	-0.6168	-0.5655	0.46021	-0.79099	-1.04389	-1.31118	-1.54097	0.634105	1.030185	-1.09767				0.497662	0.001693	1.481281	-0.4662	0.656374	-0.62425	-0.85764	-1.73045	-0.85263	0.140672	-1.17036
8.63012	-0.44882	-0.6041	-0.62926	0.41707	-0.75749	-1.04242	-1.28923	-1.49059	0.516926	1.015361	-1.09601				0.434748	-0.08113	1.465005	-0.54765	0.59081	-0.62622	-0.89255	-1.6653	-0.69603	0.22233	-1.10345
8.63833	-0.37161	-0.57879	-0.66422	0.380594	-0.73376	-1.05189	-1.2834	-1.45803	0.396445	1.014809	-1.08004				0.403792	-0.15282	1.451522	-0.6168	0.539512	-0.633	-0.89414	-1.57295	-0.55925	0.34852	-1.01965
8.64653	-0.31016	-0.55523	-0.70642	0.354251	-0.7185	-1.05079	-1.29997	-1.46243	0.294356	0.996487	-1.0673				0.439495	-0.19282	1.45719	-0.6455	0.53492	-0.64365	-0.86984	-1.50141	-0.44894	0.502398	-0.94221
8.65473	-0.28995	-0.54102	-0.78606	0.353914	-0.7002	-1.03683	-1.33053	-1.5045	0.208283	0.943546	-1.06819				0.520238	-0.19878	1.438204	-0.63536	0.587419	-0.6545	-0.83399	-1.46653	-0.3234	0.677538	-0.89415
8.66294	-0.30222	-0.50487	-0.92478	0.404105	-0.67224	-1.02705	-1.35416	-1.55884	0.128152	0.871205	-1.08284				0.595241	-0.18479	1.356093	-0.60432	0.665948	-0.66001	-0.7961	-1.42366	-0.12837	0.860516	-0.88057
8.67114	-0.31715	-0.41662	-1.09092	0.479435	-0.6554	-1.03682	-1.36133	-1.61222	0.043989	0.781199	-1.09679				0.623501	-0.17365	1.20757	-0.56841	0.72916	-0.66051	-0.76616	-1.30969	0.127899	1.044507	-0.90006
8.67934	-0.32697	-0.28934	-1.17841	0.517818	-0.66792	-1.06106	-1.34786	-1.65947	-0.04417	0.65831	-1.09517				0.605176	-0.1591	1.04771	-0.54312	0.759354	-0.65847	-0.75387	-1.09599	0.38393	1.227066	-0.94548
8.68754	-0.35149	-0.18579	-1.12241	0.474966	-0.70781	-1.08438	-1.31927	-1.68699	-0.12178	0.490722	-1.07311				0.574897	-0.1375	0.958555	-0.52603	0.761373	-0.65735	-0.77081	-0.82364	0.567583	1.388552	-1.01352
8.69575	-0.41006	-0.15923	-0.95467	0.390592	-0.75357	-1.09288	-1.28013	-1.67472	-0.17747	0.296215	-1.04318				0.577762	-0.12364	0.991507	-0.5161	0.752815	-0.65818	-0.80335	-0.58262	0.653148	1.498741	-1.09424
8.70395	-0.48553	-0.20048	-0.77382	0.353124	-0.78493	-1.08538	-1.23509	-1.59158	-0.2112	0.125595	-1.02082				0.627842	-0.13782	1.129105	-0.51637	0.741194	-0.67031	-0.83508	-0.43634	0.656499	1.525389	-1.15962
8.71207	-0.53962	-0.25975	-0.63942	0.410212	-0.79777	-1.06305	-1.19038	-1.44611	-0.22799	0.021449	-1.01011				0.683979	-0.18305	1.265466	-0.53704	0.737313	-0.69441	-0.8567	-0.4119	0.606731	1.474249	-1.18537
8.72027	-0.54814	-0.28413	-0.53757	0.529049	-0.79667	-1.02823	-1.14312	-1.28087	-0.22256	0.00000356	-1.00988				0.704649	-0.2235	1.324503	-0.58264	0.758793	-0.71996	-0.87005	-0.45752	0.530058	1.39365	-1.16371
8.72848	-0.51828	-0.26581	-0.4631	0.643281	-0.79322	-0.98292	-1.08909	-1.148	-0.18389	0.029782	-1.01699				0.687238	-0.23201	1.296574	-0.63066	0.811506	-0.72303	-0.885	-0.48821	0.441694	1.343098	-1.10703
8.73668	-0.47462	-0.22494	-0.43824	0.710829	-0.79696	-0.92697	-1.01808	-1.07689	-0.09677	0.050557	-1.01975				0.677901	-0.20322	1.209414	-0.65592	0.890675	-0.6836	-0.88985	-0.44896	0.363125	1.342065	-1.03178
8.74488	-0.42272	-0.19509	-0.49563	0.729023	-0.82293	-0.86084	-0.93568	-1.04814	0.031579	0.023028	-0.98959				0.735977	-0.15382	1.112334	-0.64393	0.971428	-0.61901	-0.87637	-0.3574	0.302954	1.364041	-0.95451
8.75309	-0.35595	-0.20521	-0.62048	0.716608	-0.86441	-0.7723	-0.86443	-1.02108	0.176117	-0.05244	-0.91507				0.890628	-0.11019	1.058731	-0.62071	1.033296	-0.57117	-0.84656	-0.29104	0.250528	1.375022	-0.8916
8.76129	-0.28207	-0.24242	-0.77723	0.683215	-0.89434	-0.64608	-0.8195	-0.94389	0.316065	-0.12947	-0.82285				1.1252	-0.08517	1.07553	-0.63491	1.060506	-0.57112	-0.8247	-0.28875	0.194912	1.360034	-0.85227
8.76949	-0.24052	-0.277	-0.91643	0.643898	-0.89447	-0.47942	-0.79179	-0.81512	0.43665	-0.15555	-0.75865				1.378085	-0.08492	1.128349	-0.69643	1.046183	-0.61029	-0.8246	-0.33513	0.130537	1.319326	-0.83857
8.7777	-0.27456	-0.29251	-0.98744	0.6313	-0.87465	-0.2882	-0.75378	-0.68034	0.518763	-0.12141	-0.74136				1.594714	-0.10105	1.163089	-0.75965	1.000941	-0.65231	-0.83144	-0.37349	0.06847	1.244439	-0.84339
8.7859	-0.37904	-0.30114	-0.95866	0.667891	-0.8671	-0.10641	-0.69035	-0.56949	0.534131	-0.06196	-0.73849				1.728864	-0.12092	1.152013	-0.76272	0.940096	-0.67592	-0.82964	-0.37574	0.013519	1.136459	-0.8579
8.7941	-0.51536	-0.3191	-0.83872	0.755626	-0.88384	0.042183	-0.61116	-0.47453	0.457649	-0.02328	-0.69909				1.771503	-0.1246	1.108743	-0.69698	0.872919	-0.68085	-0.81851	-0.36664	-0.04115	1.008367	-0.86791
8.80222	-0.62954	-0.33775	-0.72029	0.864697	-0.91107	0.149789	-0.54965	-0.36151	0.308505	-0.01871	-0.59678				1.759312	-0.10573	1.071581	-0.61855	0.806886	-0.67979	-0.81996	-0.35276	-0.11345	0.881445	-0.86166
8.81043	-0.69748	-0.33191	-0.68018	0.958587	-0.93002	0.229988	-0.53232	-0.21858	0.14429	-0.03755	-0.45625				1.7305	-0.06205	1.06239	-0.60527	0.750569	-0.67791	-0.84443	-0.32353	-0.21678	0.785682	-0.83367
8.81863	-0.71319	-0.28921	-0.70783	1.009559	-0.93779	0.303825	-0.55699	-0.07634	0.018988	-0.0652	-0.33029				1.735225	0.019113	1.093691	-0.6786	0.707488	-0.66972	-0.88125	-0.28453	-0.32344	0.734888	-0.78787
8.82683	-0.67706	-0.23638	-0.72718	1.000813	-0.94548	0.374765	-0.6035	0.003046	-0.06475	-0.09459	-0.24818				1.802717	0.141831	1.147335	-0.78828	0.677115	-0.66265	-0.90527	-0.28462	-0.39179	0.721273	-0.73741
8.83504	-0.6071	-0.20175	-0.67542	0.944554	-0.94462	0.433038	-0.64467	-0.02899	-0.13636	-0.12319	-0.21172				1.928759	0.295314	1.213211	-0.86237	0.661975	-0.67043	-0.90193	-0.37087	-0.40028	0.709102	-0.69041
8.84324	-0.52112	-0.1884	-0.56996	0.854689	-0.92679	0.464287	-0.66969	-0.17852	-0.22087	-0.14434	-0.20155				2.073904	0.433956	1.283462	-0.85457	0.664072	-0.69203	-0.87025	-0.53587	-0.36425	0.666035	-0.65639
8.85144	-0.45462	-0.16871	-0.4621	0.787074	-0.89818	0.467721	-0.67981	-0.39384	-0.31241	-0.15494	-0.19664				2.175588	0.512097	1.339239	-0.77358	0.682155	-0.70921	-0.81456	-0.73604	-0.32027	0.587926	-0.64464
8.85965	-0.43089	-0.11724	-0.39968	0.80994	-0.87077	0.453093	-0.68123	-0.58831	-0.3918	-0.15245	-0.1875				2.20943	0.511803	1.370883	-0.65376	0.708177	-0.70593	-0.75184	-0.92963	-0.28194	0.494424	-0.65703
8.86785	-0.44315	-0.03604	-0.372	0.932254	-0.85074	0.431392	-0.67476	-0.71389	-0.46799	-0.137	-0.17714				2.190632	0.445759	1.350273	-0.53635	0.734022	-0.69094	-0.7042	-1.09223	-0.24793	0.410942	-0.69006
8.87605	-0.47178	0.045529	-0.32031	1.098441	-0.82727	0.406125	-0.65839	-0.77468	-0.57007	-0.10082	-0.17444				2.153023	0.356099	1.258187	-0.45389	0.741258	-0.68736	-0.69372	-1.1929	-0.22312	0.336323	-0.72808
8.88426	-0.49386	0.086625	-0.22557	1.220755	-0.80192	0.37977	-0.6394	-0.80744	-0.71251	-0.038	-0.17459				2.104814	0.29167	1.099277	-0.42043	0.716166	-0.71407	-0.7186	-1.21663	-0.23626	0.25945	-0.76086
8.89238	-0.50115	0.074628	-0.0991	1.250873	-0.79405	0.361566	-0.62691	-0.84072	-0.85837	0.047256	-0.17251				2.029067	0.282997	0.916977	-0.44039	0.669758	-0.76154	-0.76588	-1.17743	-0.29805	0.188132	-0.78228
8.90058	-0.50143	0.031623	0.004208	1.192842	-0.82633	0.355829	-0.62538	-0.87449	-0.95373	0.14731	-0.16728				1.922602	0.31367	0.763969	-0.49004	0.619064	-0.80411	-0.822	-1.11073	-0.37745	0.138672	-0.79002
8.90878	-0.51949	0.003491	0.022308	1.09689	-0.89292	0.352213	-0.63423	-0.92468	-0.97803	0.245313	-0.16279				1.801161	0.330465	0.662995	-0.54468	0.588528	-0.82274	-0.87258	-1.0481	-0.42535	0.123743	-0.78715
8.91699	-0.56348	0.036157	-0.05722	1.007478	-0.96352	0.331356	-0.65169	-0.99622	-0.95822	0.329381	-0.16605				1.682866	0.299912	0.622834	-0.58813	0.584569	-0.81846	-0.90082	-0.99837	-0.41608	0.146169	-0.78404
8.92519	-0.60807	0.119542	-0.17144	0.945565	-1.01125	0.282808	-0.67973	-1.07518	-0.94071	0.375613	-0.17914				1.568755	0.233867	0.631323	-0.611	0.585408	-0.81193	-0.89483	-0.97792	-0.3683	0.214042	-0.79741
8.93339	-0.62836	0.196466	-0.22757	0.917951	-1.02886	0.215178	-0.71254	-1.13175	-0.94213	0.362079	-0.20302				1.462853	0.195522	0.655304	-0.62955	0.563444	-0.81873	-0.86749	-0.99426	-0.31044	0.326937	-0.8337
8.9416	-0.6152	0.200163	-0.19148	0.913145	-1.03604	0.14375	-0.73542	-1.1399	-0.96149	0.297596	-0.24432				1.378468	0.222303	0.649594	-0.65682	0.509146	-0.84318	-0.85	-1.02877	-0.26852	0.460807	-0.88492
8.9498	-0.59692	0.137007	-0.10078	0.908097	-1.05439	0.082953	-0.73927	-1.10579	-0.98987	0.218461	-0.31453				1.331218	0.292147	0.575546	-0.68557	0.444485	-0.86815	-0.85453	-1.0393	-0.25656	0.577428	-0.93349
8.958	-0.60787	0.096221	-0.01628	0.884683	-1.08686	0.02921	-0.72618	-1.04615	-1.01517	0.169638	-0.40249				1.312836	0.359183	0.44374	-0.69196	0.381217	-0.88371	-0.85896	-0.98914	-0.28978	0.661283	-0.96644
8.96621	-0.66601	0.166952	0.053925	0.84996	-1.1103	-0.03231	-0.71244	-0.9844	-1.02962	0.158155	-0.47377				1.273739	0.395968	0.306347	-0.65711	0.316811	-0.89584	-0.83143	-0.8983	-0.3751	0.720868	-0.98647
8.97441	-0.75065	0.345304	0.132898	0.818291	-1.09766	-0.10853	-0.71153	-0.92411	-1.01898	0.160431	-0.50223				1.180276	0.392958	0.213849	-0.5785	0.255676	-0.90597	-0.76907	-0.81023	-0.48173	0.767779	-1.00262
8.98253	-0.82801	0.525392	0.21238	0.792035	-1.05176	-0.18821	-0.72473	-0.85957	-0.98709	0.1505	-0.49741				1.038006	0.352364	0.175064	-0.46228	0.213937	-0.90877	-0.70353	-0.769	-0.57112	0.797865	-1.01994
8.99073	-0.88671	0.60679	0.256341	0.765172	-1.00232	-0.24788	-0.74564	-0.80977	-0.95129	0.118157	-0.50666				0.911547	0.277976	0.176109	-0.33114	0.210739	-0.89018	-0.66731	-0.7874	-0.61627	0.791133	-1.04067
8.99894	-0.91872	0.577959	0.228736	0.721703	-0.99027	-0.28084	-0.77081	-0.81366	-0.92677	0.084012	-0.55299				0.861275	0.167694	0.202347	-0.21306	0.239761	-0.85539	-0.66576	-0.84711	-0.61909	0.747758	-1.07086
9.00714	-0.92552	0.490523	0.143715	0.662468	-1.01788	-0.30384	-0.80066	-0.90829	-0.9272	0.061415	-0.61184				0.883749	0.044535	0.242811	-0.14087	0.266792	-0.82069	-0.6814	-0.93553	-0.59546	0.700572	-1.11466
9.01534	-0.90175	0.384993	0.054944	0.608742	-1.04289	-0.3411	-0.82766	-1.0872	-0.96255	0.049189	-0.64152				0.936886	-0.04455	0.28659	-0.13791	0.252463	-0.7988	-0.6911	-1.03723	-0.55123	0.678584	-1.16178
9.02355	-0.8419	0.255416	0.02453	0.575782	-1.02468	-0.40338	-0.8459	-1.2919	-1.03457	0.042895	-0.63002				0.969026	-0.06523	0.29113	-0.19752	0.199494	-0.7924	-0.69367	-1.13303	-0.49539	0.689278	-1.19228
9.03175	-0.76302	0.092119	0.094677	0.555786	-0.94959	-0.47849	-0.85416	-1.45788	-1.11192	0.04769	-0.60635				0.961436	-0.01849	0.232987	-0.28777	0.138451	-0.78743	-0.69825	-1.18314	-0.42679	0.704233	-1.18388
9.03995	-0.69651	-0.08483	0.229924	0.518251	-0.84713	-0.54784	-0.86249	-1.54897	-1.16534	0.069504	-0.5973				0.923546	0.043856	0.10978	-0.37311	0.088688	-0.78084	-0.71598	-1.14731	-0.33613	0.688533	-1.1444
9.04816	-0.6784	-0.2356	0.35758	0.463813	-0.75883	-0.59519	-0.87979	-1.56191	-1.19114	0.113093	-0.60776				0.869146	0.065755	-0.0642	-0.42815	0.060483	-0.77702	-0.73915	-1.05171	-0.20089	0.625091	-1.10709
9.05636	-0.70961	-0.32293	0.403053	0.409663	-0.70537	-0.61683	-0.90816	-1.51027	-1.22042	0.192997	-0.6179				0.811814	0.027942	-0.25215	-0.41742	0.065096	-0.78383	-0.75284	-0.98229	-0.00489	0.532308	-1.10656
9.06456	-0.76416	-0.34704	0.360157	0.369007	-0.67695	-0.62626	-0.93976	-1.42721	-1.28015	0.314689	-0.61261				0.745821	-0.04057	-0.39518	-0.32776	0.111753	-0.80482	-0.75266	-0.99913	0.238908	0.46084	-1.15457
9.07268	-0.81075	-0.3302	0.275999	0.338667	-0.65531	-0.64142	-0.96206	-1.33748	-1.3571	0.462351	-0.59335				0.676908	-0.09108	-0.40246	-0.19073	0.186508	-0.83692	-0.74727	-1.08102	0.492099	0.434616	-1.22469
9.08088	-0.82583	-0.3062	0.199094	0.295911	-0.63778	-0.66832	-0.97662	-1.27389	-1.4117	0.601246	-0.55545				0.606134	-0.11262	-0.25614	-0.06722	0.255676	-0.87136	-0.74736	-1.16464	0.698929	0.432969	-1.27774
9.08909	-0.80942	-0.29095	0.169807	0.24233	-0.6296	-0.69478	-0.99021	-1.26155	-1.41369	0.710883	-0.49297				0.5252	-0.12379	-0.03482	-0.01313	0.295829	-0.90323	-0.74854	-1.19377	0.81771	0.410798	-1.28559
9.09729	-0.77228	-0.29279	0.193647	0.202897	-0.63223	-0.70575	-1.01316	-1.28509	-1.37005	0.807426	-0.42012				0.436304	-0.1582	0.128959	-0.02393	0.305744	-0.93552	-0.74736	-1.14534	0.842838	0.339389	-1.25292
9.10549	-0.74295	-0.31257	0.267435	0.200961	-0.63363	-0.69936	-1.04219	-1.29702	-1.30888	0.928663	-0.3766				0.355087	-0.21982	0.148097	-0.0567	0.313627	-0.96978	-0.7364	-1.03905	0.808783	0.229494	-1.21116
9.1137	-0.74465	-0.35084	0.37946	0.226611	-0.61681	-0.69725	-1.05691	-1.2447	-1.26368	1.092148	-0.39551				0.288824	-0.27321	0.062451	-0.06145	0.327452	-1.00042	-0.72268	-0.92208	0.75316	0.10518	-1.18525
9.1219	-0.77041	-0.4198	0.502024	0.246982	-0.57935	-0.72133	-1.04237	-1.13909	-1.26658	1.252247	-0.46786				0.235654	-0.2887	-0.0336	-0.02396	0.329485	-1.01151	-0.7112	-0.87164	0.685385	-0.00583	-1.1805
9.1301	-0.78651	-0.50992	0.600932	0.242079	-0.52924	-0.7683	-0.99759	-1.0369	-1.32012	1.350697	-0.54254				0.208533	-0.25694	-0.06535	0.025284	0.289972	-0.98919	-0.69672	-0.93692	0.613678	-0.073	-1.18682
9.13831	-0.75571	-0.59528	0.634756	0.202743	-0.47845	-0.82032	-0.93856	-0.99234	-1.40047	1.361719	-0.57809				0.222798	-0.21018	-0.02805	0.055114	0.195187	-0.93406	-0.67322	-1.07738	0.553396	-0.07068	-1.19972
9.14651	-0.6787	-0.63789	0.57612	0.134916	-0.44187	-0.86002	-0.88108	-1.01914	-1.46863	1.294849	-0.58192				0.292828	-0.18668	0.026087	0.055881	0.073669	-0.85976	-0.64075	-1.17473	0.533262	0.002076	-1.21163
9.15471	-0.59356	-0.62493	0.43592	0.053634	-0.4453	-0.88664	-0.84034	-1.06742	-1.50646	1.18493	-0.59054				0.408596	-0.19879	0.052655	0.05255	-0.02962	-0.78988	-0.62418	-1.1514	0.543112	0.103141	-1.20403
9.16284	-0.55228	-0.57622	0.290056	-0.01514	-0.50321	-0.90112	-0.82693	-1.10003	-1.52802	1.072222	-0.62283				0.522651	-0.237	0.043698	0.074042	-0.08079	-0.73258	-0.63346	-1.04714	0.526392	0.174478	-1.16806
9.17104	-0.57525	-0.49815	0.218166	-0.04493	-0.60871	-0.90703	-0.84204	-1.11616	-1.54363	0.995093	-0.66003				0.58896	-0.29453	0.039212	0.127319	-0.08609	-0.68256	-0.66325	-0.94193	0.446109	0.172693	-1.12035
9.17924	-0.66117	-0.39046	0.227085	-0.02781	-0.73267	-0.90875	-0.88039	-1.13785	-1.55147	0.955219	-0.67508				0.578213	-0.37554	0.061088	0.188348	-0.09676	-0.62971	-0.69056	-0.88564	0.321171	0.096009	-1.08808
9.18744	-0.79273	-0.26357	0.253502	0.012901	-0.82984	-0.90383	-0.9286	-1.18895	-1.53872	0.91922	-0.67428				0.49138	-0.46076	0.096173	0.219811	-0.14305	-0.5716	-0.69352	-0.87731	0.215801	-0.02089	-1.08522
9.19565	-0.91818	-0.1484	0.21525	0.030354	-0.88415	-0.89496	-0.97604	-1.28782	-1.51406	0.863201	-0.68856				0.338995	-0.50843	0.106134	0.20005	-0.20349	-0.52437	-0.67253	-0.88598	0.163116	-0.11876	-1.103
9.20385	-0.98377	-0.06481	0.104228	0.010657	-0.90964	-0.88539	-1.01181	-1.43039	-1.50765	0.788183	-0.74233				0.167191	-0.48287	0.074861	0.144671	-0.22693	-0.50819	-0.63918	-0.89169	0.153	-0.15287	-1.12144
9.21205	-0.96134	0.004346	-0.04177	-0.0275	-0.93236	-0.87798	-1.03542	-1.56274	-1.53484	0.724042	-0.81603				0.036875	-0.39657	0.018355	0.098742	-0.19427	-0.53139	-0.6123	-0.86643	0.167181	-0.1296	-1.13028
9.22026	-0.87714	0.098294	-0.16218	-0.0461	-0.96433	-0.87285	-1.05193	-1.63124	-1.58171	0.684071	-0.86025				-0.02992	-0.30886	-0.04136	0.096466	-0.1259	-0.5814	-0.59385	-0.78796	0.192806	-0.09975	-1.13109
9.22846	-0.78969	0.245301	-0.22493	-0.0287	-0.98867	-0.86902	-1.07022	-1.61692	-1.61605	0.641396	-0.83942				-0.05893	-0.2763	-0.07801	0.13776	-0.05627	-0.63176	-0.57853	-0.65396	0.236572	-0.11801	-1.11773
9.23666	-0.72552	0.441679	-0.23124	0.001911	-0.98684	-0.87414	-1.09794	-1.54247	-1.63072	0.565325	-0.75941				-0.10773	-0.3106	-0.08691	0.193461	-0.00946	-0.67814	-0.56243	-0.49905	0.302269	-0.18542	-1.08761
9.24487	-0.67547	0.650089	-0.18656	0.034977	-0.9552	-0.89578	-1.12894	-1.43744	-1.64181	0.460654	-0.67219				-0.19693	-0.37405	-0.06751	0.230664	0.002574	-0.73438	-0.54326	-0.37565	0.388862	-0.26749	-1.04482
9.25307	-0.61814	0.818724	-0.13729	0.07832	-0.91589	-0.93327	-1.14989	-1.32134	-1.65623	0.361658	-0.6165				-0.29018	-0.42275	-0.03446	0.250474	-0.02987	-0.81106	-0.51751	-0.31711	0.47596	-0.34328	-0.99989
9.26119	-0.57703	0.905589	-0.12339	0.145222	-0.88728	-0.96275	-1.1499	-1.21725	-1.65897	0.288837	-0.58395				-0.35191	-0.42911	-0.01362	0.264956	-0.08444	-0.90123	-0.48622	-0.34659	0.525133	-0.41784	-0.95562
9.26939	-0.5829	0.900718	-0.15753	0.221044	-0.87273	-0.9519	-1.13558	-1.15438	-1.63263	0.237073	-0.54081				-0.37236	-0.38801	0.006068	0.284386	-0.10742	-0.97997	-0.4591	-0.45013	0.515297	-0.50682	-0.91363
9.2776	-0.63057	0.836284	-0.21384	0.273094	-0.87168	-0.89776	-1.11956	-1.16708	-1.5826	0.190768	-0.4706				-0.37256	-0.32814	0.046504	0.305548	-0.03616	-1.0213	-0.44666	-0.57208	0.456099	-0.59534	-0.88854
9.2858	-0.68551	0.771849	-0.25365	0.292088	-0.87639	-0.83131	-1.10682	-1.24247	-1.53475	0.161417	-0.39648				-0.3647	-0.29056	0.120539	0.309383	0.142808	-1.01477	-0.4622	-0.6305	0.384357	-0.65593	-0.88423
9.294	-0.69702	0.726089	-0.25704	0.294428	-0.87814	-0.79005	-1.10294	-1.34764	-1.52556	0.174018	-0.34476				-0.35005	-0.31094	0.203626	0.292889	0.379554	-0.98314	-0.50166	-0.58348	0.326355	-0.66139	-0.89918
9.30221	-0.65432	0.676286	-0.22087	0.31608	-0.85839	-0.77935	-1.11394	-1.46608	-1.56665	0.22171	-0.30786				-0.32268	-0.37201	0.258963	0.268552	0.624715	-0.96435	-0.54361	-0.46623	0.277322	-0.60195	-0.92837
9.31041	-0.59233	0.592288	-0.16594	0.365125	-0.7991	-0.77763	-1.1459	-1.57401	-1.63841	0.275322	-0.24299				-0.29162	-0.41492	0.289727	0.271166	0.862996	-0.98487	-0.56977	-0.36077	0.224917	-0.50617	-0.96873
9.31861	-0.56886	0.463195	-0.10803	0.417204	-0.71014	-0.76454	-1.19755	-1.65165	-1.71047	0.299675	-0.1141				-0.28005	-0.40093	0.300679	0.319494	1.103672	-1.03775	-0.57171	-0.32118	0.181872	-0.42244	-1.02229
9.32682	-0.60363	0.30058	-0.06861	0.450916	-0.63019	-0.75016	-1.25056	-1.68303	-1.76091	0.289159	0.090467				-0.29926	-0.35135	0.30127	0.403022	1.327062	-1.0859	-0.55475	-0.3161	0.172183	-0.3836	-1.07729
9.33502	-0.66253	0.13204	-0.08314	0.466837	-0.5942	-0.75742	-1.28594	-1.69124	-1.79306	0.248608	0.348925				-0.34421	-0.33363	0.292066	0.505526	1.484781	-1.10042	-0.52767	-0.29441	0.18721	-0.38488	-1.1119
9.34322	-0.69618	-0.00205	-0.15526	0.474899	-0.59882	-0.78791	-1.29721	-1.72088	-1.81625	0.173491	0.619918				-0.38821	-0.39313	0.269241	0.612426	1.554951	-1.0785	-0.50083	-0.23675	0.20118	-0.391	-1.1106
9.35134	-0.6818	-0.08717	-0.23911	0.462792	-0.61808	-0.82222	-1.29683	-1.77427	-1.84285	0.064697	0.857268				-0.41193	-0.50959	0.22725	0.723277	1.556323	-1.03868	-0.48339	-0.15866	0.189623	-0.36864	-1.09054
9.35955	-0.65158	-0.14598	-0.25268	0.419343	-0.63309	-0.83867	-1.30053	-1.81227	-1.87084	-0.04743	1.019863				-0.42014	-0.62634	0.157384	0.81261	1.547481	-0.98604	-0.49176	-0.09307	0.149118	-0.31524	-1.08333
9.36775	-0.63885	-0.20687	-0.15093	0.345534	-0.64547	-0.83878	-1.30892	-1.78363	-1.88363	-0.10775	1.095229				-0.43709	-0.6973	0.066083	0.83251	1.557624	-0.91463	-0.54327	-0.04336	0.101407	-0.25208	-1.10146
9.37595	-0.64663	-0.28975	0.033326	0.261719	-0.66094	-0.84002	-1.31343	-1.70358	-1.88077	-0.11084	1.102319				-0.48675	-0.70784	-0.03415	0.764067	1.566957	-0.81307	-0.63132	-0.01161	0.065259	-0.19661	-1.13165
9.38415	-0.65557	-0.37663	0.177862	0.189191	-0.65988	-0.85135	-1.30812	-1.62673	-1.87018	-0.10861	1.076162				-0.54203	-0.66843	-0.11538	0.642561	1.548995	-0.66197	-0.71649	-0.00809	0.051506	-0.17067	-1.13935
9.39236	-0.65714	-0.42436	0.163759	0.145193	-0.61861	-0.86296	-1.29784	-1.587	-1.8668	-0.15498	1.045476				-0.55678	-0.61835	-0.16634	0.534738	1.505558	-0.44652	-0.76376	-0.05492	0.052856	-0.19816	-1.09387
9.40056	-0.65594	-0.40279	0.00157	0.145974	-0.52934	-0.85397	-1.29241	-1.58112	-1.87622	-0.26162	1.012358				-0.50772	-0.59653	-0.18764	0.48749	1.47026	-0.15911	-0.76499	-0.15751	0.061804	-0.28478	-0.97698
9.40876	-0.63623	-0.33465	-0.18866	0.182574	-0.4184	-0.81833	-1.29912	-1.58404	-1.89375	-0.38789	0.969304				-0.42063	-0.61306	-0.17391	0.510161	1.475015	0.160056	-0.74083	-0.26983	0.071318	-0.39314	-0.79616
9.41697	-0.58493	-0.29325	-0.26707	0.237553	-0.31611	-0.76586	-1.31596	-1.57345	-1.90691	-0.48111	0.903121				-0.36008	-0.63759	-0.12849	0.577466	1.526221	0.433839	-0.71357	-0.33963	0.074669	-0.46768	-0.57639
9.42517	-0.50093	-0.34443	-0.19623	0.275213	-0.2397	-0.71202	-1.32949	-1.51961	-1.90561	-0.52127	0.81378				-0.35267	-0.62624	-0.06171	0.652087	1.592567	0.599221	-0.6818	-0.34528	0.078013	-0.48394	-0.35131
9.43337	-0.41012	-0.48834	-0.03	0.259002	-0.19892	-0.6689	-1.3296	-1.39334	-1.89765	-0.52801	0.721812				-0.37947	-0.56938	0.005821	0.702518	1.637091	0.647984	-0.63196	-0.32167	0.079447	-0.45741	-0.15544
9.4415	-0.36227	-0.64113	0.173804	0.186109	-0.18592	-0.63356	-1.31102	-1.20233	-1.88901	-0.5422	0.649197				-0.38904	-0.48661	0.081327	0.7162	1.638584	0.630354	-0.54895	-0.3301	0.072486	-0.4232	-0.01218
9.4497	-0.3793	-0.70884	0.361561	0.081479	-0.18192	-0.60318	-1.28023	-1.0209	-1.87477	-0.59049	0.612313				-0.3637	-0.4135	0.175807	0.718906	1.611581	0.600571	-0.4427	-0.38975	0.052611	-0.39745	0.069355
9.4579	-0.44119	-0.66315	0.483677	-0.00578	-0.16569	-0.58073	-1.24846	-0.93579	-1.84745	-0.65287	0.601385				-0.34524	-0.3623	0.286508	0.735449	1.591038	0.582006	-0.32886	-0.46273	0.020256	-0.37811	0.095075
9.4661	-0.49175	-0.55079	0.475128	-0.04991	-0.13368	-0.57151	-1.22039	-0.96209	-1.81081	-0.67121	0.587749				-0.38054	-0.33487	0.373571	0.764133	1.599241	0.562662	-0.22281	-0.49779	-0.01812	-0.37112	0.08637
9.47431	-0.49896	-0.43377	0.329712	-0.051	-0.09785	-0.57558	-1.18582	-1.05266	-1.78283	-0.61638	0.549462				-0.48275	-0.32889	0.372622	0.781865	1.639877	0.525185	-0.13155	-0.5034	-0.06187	-0.38473	0.064927
9.48251	-0.47086	-0.3372	0.13907	-0.02627	-0.06043	-0.58474	-1.13418	-1.1294	-1.78149	-0.52076	0.486307				-0.61118	-0.32663	0.299468	0.795307	1.691531	0.473635	-0.05829	-0.52191	-0.10613	-0.41865	0.047727
9.49071	-0.43075	-0.25852	-0.00886	-0.01023	-0.01372	-0.58728	-1.07531	-1.14763	-1.81082	-0.45767	0.428301				-0.69959	-0.31518	0.220233	0.854555	1.725799	0.425077	-0.00918	-0.57656	-0.1477	-0.43706	0.039788
9.49892	-0.39748	-0.18996	-0.08112	-0.02387	0.057877	-0.57218	-1.02358	-1.10205	-1.85939	-0.47807	0.40602				-0.70894	-0.28298	0.182837	0.991112	1.730881	0.388125	0.02128	-0.64863	-0.19507	-0.39789	0.051379
9.50712	-0.37777	-0.1445	-0.11442	-0.07327	0.164606	-0.54003	-0.99028	-1.01081	-1.91543	-0.55891	0.423342				-0.63852	-0.24725	0.189111	1.186496	1.714234	0.348628	0.037864	-0.70276	-0.26633	-0.30532	0.090632
9.51532	-0.37283	-0.14335	-0.14777	-0.15435	0.303627	-0.49297	-0.97336	-0.91898	-1.9715	-0.63016	0.452398				-0.52608	-0.24134	0.205319	1.377682	1.707354	0.291728	0.037726	-0.73306	-0.37249	-0.21178	0.145934
9.52353	-0.37305	-0.19695	-0.19183	-0.25549	0.465273	-0.43768	-0.96194	-0.85779	-2.01216	-0.64391	0.460265				-0.4301	-0.28314	0.212418	1.52934	1.732793	0.222812	-0.00097	-0.77071	-0.49461	-0.18099	0.184124
9.53165	-0.35623	-0.30762	-0.21395	-0.34894	0.630012	-0.38337	-0.95697	-0.84246	-2.02352	-0.62484	0.438685				-0.40571	-0.36506	0.190226	1.648536	1.796935	0.170553	-0.07867	-0.85261	-0.5983	-0.22885	0.172885
9.53985	-0.29917	-0.44701	-0.16352	-0.40061	0.776668	-0.33813	-0.9661	-0.85825	-2.00153	-0.6271	0.397738				-0.45955	-0.44084	0.138026	1.743569	1.884811	0.148786	-0.15815	-0.94959	-0.66228	-0.31399	0.114277
9.54805	-0.20078	-0.56974	-0.02443	-0.40498	0.874964	-0.31085	-0.99543	-0.88375	-1.96392	-0.67665	0.351647				-0.55893	-0.46526	0.075287	1.816045	1.974358	0.13267	-0.19789	-1.00601	-0.70408	-0.37733	0.034334
9.55626	-0.09216	-0.6248	0.174976	-0.37031	0.925059	-0.30097	-1.033	-0.91435	-1.9259	-0.74645	0.308107				-0.65502	-0.42737	0.060896	1.856192	2.08016	0.094078	-0.17271	-1.00529	-0.73994	-0.39487	-0.04226
9.56446	0.002567	-0.58096	0.322861	-0.32551	0.944774	-0.30591	-1.06699	-0.9462	-1.8871	-0.77179	0.2801				-0.72423	-0.3628	0.153945	1.85498	2.227495	0.02809	-0.10545	-0.9673	-0.76601	-0.37874	-0.10721
9.57266	0.085389	-0.46519	0.319389	-0.29988	0.952372	-0.30593	-1.09375	-0.99519	-1.83879	-0.72815	0.280453				-0.78725	-0.32047	0.325417	1.812086	2.431217	-0.03827	-0.03242	-0.93554	-0.77287	-0.34675	-0.15587
9.58087	0.172578	-0.3402	0.166891	-0.3051	0.964427	-0.28082	-1.11854	-1.07768	-1.77781	-0.64615	0.318196				-0.85267	-0.3111	0.479415	1.735016	2.673179	-0.07365	0.017801	-0.92496	-0.75983	-0.31739	-0.17261
9.58907	0.279249	-0.26642	-0.00661	-0.33143	0.987581	-0.23204	-1.14834	-1.19426	-1.71872	-0.5654	0.385337				-0.90674	-0.31472	0.545346	1.647044	2.908177	-0.07261	0.036374	-0.93056	-0.74746	-0.30939	-0.15085
9.59727	0.401882	-0.24904	-0.04582	-0.36379	1.015886	-0.17628	-1.17734	-1.30992	-1.67423	-0.50372	0.454348				-0.90838	-0.30528	0.542195	1.576745	3.098166	-0.05356	0.028847	-0.94432	-0.74151	-0.34145	-0.11057
9.60548	0.530312	-0.25982	0.09551	-0.39713	1.02682	-0.13833	-1.19315	-1.37252	-1.64384	-0.448	0.501326				-0.8356	-0.29112	0.501071	1.541801	3.229777	-0.04334	0.005864	-0.9752	-0.72784	-0.40408	-0.08802
9.61368	0.641078	-0.27209	0.336394	-0.42239	1.009462	-0.12658	-1.1912	-1.3665	-1.62118	-0.38432	0.508725				-0.71084	-0.28683	0.4131	1.517447	3.308036	-0.05199	-0.00764	-1.04599	-0.69716	-0.4613	-0.09824
9.6218	0.726243	-0.28363	0.521404	-0.4354	0.966716	-0.13834	-1.18275	-1.30665	-1.59723	-0.31039	0.466191				-0.58119	-0.28101	0.267452	1.462364	3.327128	-0.07208	-0.00393	-1.15006	-0.67333	-0.48217	-0.12892
9.63	0.77412	-0.30699	0.577586	-0.42359	0.908688	-0.164	-1.17688	-1.20146	-1.58086	-0.23991	0.377642				-0.51267	-0.22688	0.100465	1.366911	3.293984	-0.09092	-0.00083	-1.27094	-0.69973	-0.46532	-0.15827
9.63821	0.768492	-0.34453	0.540646	-0.38011	0.851457	-0.18814	-1.17168	-1.03718	-1.59373	-0.18263	0.262654				-0.53253	-0.08725	-0.00428	1.270378	3.24351	-0.08995	-0.02373	-1.38242	-0.77938	-0.44421	-0.17759
9.64641	0.712116	-0.39446	0.463957	-0.31686	0.791085	-0.20233	-1.16152	-0.82936	-1.64464	-0.12941	0.149851				-0.62271	0.113967	0.007458	1.226767	3.222015	-0.06552	-0.07706	-1.44235	-0.8749	-0.43618	-0.19925
9.65461	0.631045	-0.4562	0.397159	-0.24326	0.72745	-0.19878	-1.1445	-0.64997	-1.70489	-0.06848	0.057582				-0.73146	0.312504	0.11088	1.252812	3.250966	-0.03234	-0.14063	-1.41782	-0.93837	-0.43862	-0.23123
9.66282	0.587808	-0.53462	0.34684	-0.17629	0.672855	-0.18818	-1.13323	-0.55733	-1.73323	0.000359	-0.00345				-0.81095	0.432184	0.231432	1.323292	3.299741	-0.01095	-0.19225	-1.31384	-0.95274	-0.44548	-0.27543
9.67102	0.621596	-0.6259	0.312029	-0.13004	0.636191	-0.18823	-1.14262	-0.55235	-1.71575	0.055687	-0.03655				-0.85104	0.448154	0.301903	1.375917	3.324662	-0.01907	-0.22478	-1.18628	-0.94441	-0.45142	-0.32792
9.67922	0.713396	-0.70132	0.294577	-0.11159	0.610809	-0.20663	-1.17284	-0.56173	-1.68055	0.076705	-0.0592				-0.86364	0.399318	0.303706	1.362161	3.315656	-0.05202	-0.25371	-1.09442	-0.93909	-0.46736	-0.38053
9.68743	0.799936	-0.7304	0.286492	-0.12645	0.583947	-0.23411	-1.20876	-0.52775	-1.67217	0.051254	-0.08452				-0.87463	0.332604	0.228557	1.282205	3.312799	-0.08835	-0.2904	-1.0539	-0.93216	-0.49794	-0.43186
9.69563	0.818232	-0.70173	0.287325	-0.15194	0.55865	-0.25965	-1.23099	-0.44272	-1.70779	0.00099	-0.12035				-0.89443	0.280812	0.10451	1.180756	3.359427	-0.10688	-0.33701	-1.03317	-0.91378	-0.53372	-0.47896
9.70383	0.753593	-0.643	0.288544	-0.15485	0.535222	-0.28472	-1.23756	-0.34999	-1.76564	-0.03515	-0.16053				-0.91328	0.245523	-0.02926	1.127116	3.47012	-0.11476	-0.38026	-1.01779	-0.90163	-0.54726	-0.52231
9.71195	0.625407	-0.58546	0.301058	-0.11628	0.509018	-0.31417	-1.23471	-0.30773	-1.79898	-0.03887	-0.19289				-0.92138	0.223515	-0.14062	1.148279	3.636724	-0.13313	-0.40677	-1.03314	-0.92063	-0.50066	-0.55777
9.72016	0.478257	-0.5498	0.318757	-0.06358	0.469803	-0.3518	-1.22387	-0.31799	-1.76602	-0.02528	-0.20725				-0.91263	0.208729	-0.19494	1.223872	3.81625	-0.17523	-0.4216	-1.09738	-0.97455	-0.3704	-0.57893
9.72836	0.347304	-0.55041	0.325454	-0.03575	0.413765	-0.39121	-1.20388	-0.35649	-1.6456	-0.03594	-0.20183				-0.88756	0.184774	-0.18457	1.312596	3.963684	-0.2368	-0.43752	-1.20062	-1.03999	-0.16718	-0.58295
9.73656	0.23333	-0.57934	0.303789	-0.04315	0.347378	-0.42652	-1.18052	-0.38902	-1.44292	-0.08883	-0.18072				-0.84396	0.139582	-0.12548	1.390738	4.046918	-0.29983	-0.47055	-1.29838	-1.08756	0.049772	-0.56519
9.74477	0.113454	-0.62552	0.232038	-0.06276	0.282975	-0.44925	-1.16777	-0.41084	-1.20185	-0.16643	-0.14612				-0.80215	0.065287	-0.05115	1.462142	4.064631	-0.35582	-0.51687	-1.35765	-1.12137	0.213336	-0.53032
9.75297	-0.0183	-0.66271	0.104382	-0.05726	0.231973	-0.45098	-1.17078	-0.46195	-0.98101	-0.23567	-0.10275				-0.80635	-0.01777	0.01519	1.532119	4.058583	-0.40889	-0.55408	-1.37433	-1.16113	0.291988	-0.48553
9.76117	-0.13254	-0.65599	-0.04927	-0.02044	0.195961	-0.436	-1.17834	-0.55739	-0.8418	-0.28204	-0.0551				-0.89566	-0.08101	0.071008	1.609948	4.074455	-0.47412	-0.56794	-1.3625	-1.20458	0.303152	-0.44072
9.76937	-0.18572	-0.59585	-0.14809	0.021541	0.176362	-0.4142	-1.17718	-0.66012	-0.82148	-0.33673	-0.01693				-1.06087	-0.11161	0.119314	1.702308	4.124907	-0.54781	-0.56517	-1.33159	-1.21498	0.2897	-0.41023
9.77758	-0.15783	-0.50901	-0.13312	0.040872	0.167108	-0.4008	-1.16331	-0.71203	-0.91818	-0.42905	-0.00143				-1.2259	-0.11679	0.158746	1.810321	4.171742	-0.60697	-0.56715	-1.26506	-1.16548	0.285844	-0.409
9.78578	-0.07887	-0.43716	-0.01634	0.038685	0.152831	-0.40707	-1.1451	-0.71596	-1.08905	-0.55364	-0.01357				-1.32267	-0.12204	0.170276	1.928652	4.163994	-0.6332	-0.58756	-1.16547	-1.07298	0.313701	-0.44349
9.79398	-0.00039	-0.38463	0.119319	0.043463	0.122078	-0.4326	-1.12119	-0.71961	-1.24383	-0.67082	-0.04817				-1.32674	-0.13048	0.148978	2.052203	4.089332	-0.62653	-0.62055	-1.03467	-0.95725	0.372456	-0.50676
9.80219	0.049267	-0.33303	0.198014	0.080853	0.069609	-0.47068	-1.08065	-0.76757	-1.30764	-0.7369	-0.08729				-1.27435	-0.129	0.11388	2.200471	3.979798	-0.61657	-0.6541	-0.86933	-0.82035	0.442806	-0.58786
9.81031	0.057342	-0.28144	0.21741	0.15155	0.010473	-0.50563	-1.02364	-0.881	-1.27375	-0.73663	-0.12652				-1.20541	-0.1009	0.088041	2.3979	3.888872	-0.62051	-0.6774	-0.69525	-0.65144	0.483763	-0.66868
9.81851	0.031244	-0.264	0.213923	0.208859	-0.03856	-0.52886	-0.97024	-1.03986	-1.20102	-0.68177	-0.17185				-1.13569	-0.05343	0.076443	2.645629	3.840104	-0.63619	-0.69494	-0.55161	-0.46887	0.465298	-0.73277
9.82672	-0.01344	-0.31962	0.229045	0.200884	-0.06225	-0.53728	-0.94401	-1.20995	-1.1585	-0.61963	-0.23304				-1.08785	-0.01095	0.080089	2.916656	3.808552	-0.64618	-0.71869	-0.47994	-0.33751	0.401543	-0.75428
9.83492	-0.03932	-0.43179	0.261803	0.103758	-0.05642	-0.53435	-0.94233	-1.34183	-1.16054	-0.6049	-0.30603				-1.08071	-0.00458	0.118819	3.174389	3.747814	-0.64268	-0.74388	-0.49072	-0.30125	0.334559	-0.71442
9.84312	-0.01836	-0.54145	0.295611	-0.04936	-0.0381	-0.53402	-0.94586	-1.3979	-1.17354	-0.65895	-0.37486				-1.11823	-0.05913	0.199416	3.397302	3.633099	-0.6426	-0.75104	-0.5674	-0.34108	0.298047	-0.61863
9.85133	0.041182	-0.61155	0.347102	-0.17097	-0.02402	-0.54196	-0.92916	-1.38113	-1.16895	-0.75302	-0.43297				-1.17069	-0.16548	0.314231	3.573511	3.472444	-0.64947	-0.71989	-0.67071	-0.38996	0.275784	-0.48905
9.85953	0.105266	-0.67945	0.432386	-0.19864	-0.02726	-0.55381	-0.88212	-1.34811	-1.15915	-0.82911	-0.47951				-1.20161	-0.29719	0.41731	3.701846	3.289001	-0.64972	-0.65524	-0.75696	-0.40337	0.246168	-0.35218
9.86773	0.117623	-0.79955	0.545599	-0.12537	-0.04435	-0.56409	-0.80737	-1.34486	-1.1651	-0.83989	-0.51555				-1.20292	-0.41589	0.46446	3.783501	3.113704	-0.63379	-0.5834	-0.80662	-0.38909	0.214225	-0.21944
9.87593	0.047262	-0.96886	0.619541	-0.00792	-0.06497	-0.575	-0.71751	-1.3669	-1.17577	-0.78879	-0.53447				-1.1703	-0.49442	0.45765	3.835945	2.959766	-0.62005	-0.53559	-0.80958	-0.37077	0.186524	-0.09998
9.88414	-0.09088	-1.1074	0.600269	0.082211	-0.08962	-0.58811	-0.63482	-1.39822	-1.17276	-0.72031	-0.5215				-1.11139	-0.52924	0.413746	3.869041	2.821466	-0.63462	-0.52301	-0.77001	-0.35873	0.164131	-0.01709
9.89234	-0.25816	-1.13612	0.516019	0.111983	-0.12574	-0.59586	-0.57468	-1.42691	-1.1589	-0.66886	-0.47944				-1.04092	-0.51609	0.364986	3.883737	2.686777	-0.68026	-0.53176	-0.70183	-0.34215	0.133737	0.015093
9.90046	-0.40538	-1.06245	0.429902	0.083146	-0.18663	-0.58799	-0.54206	-1.47001	-1.16637	-0.63861	-0.42297				-0.98691	-0.46589	0.328292	3.890789	2.560532	-0.73846	-0.54696	-0.62783	-0.31548	0.091519	0.010299
9.90866	-0.49411	-0.9515	0.374414	0.022475	-0.26527	-0.55854	-0.51838	-1.52986	-1.22144	-0.61606	-0.37277				-0.96524	-0.39289	0.30072	3.900644	2.452967	-0.78761	-0.56259	-0.55766	-0.28054	0.041673	0.013052
9.91687	-0.51253	-0.87257	0.319667	-0.03897	-0.33586	-0.51585	-0.48462	-1.5579	-1.31993	-0.58786	-0.34792				-0.9591	-0.3238	0.260972	3.925724	2.349823	-0.82634	-0.58641	-0.50653	-0.24372	-0.01483	0.049343
9.92507	-0.48591	-0.85098	0.254073	-0.07262	-0.37157	-0.47743	-0.43075	-1.52084	-1.42044	-0.55705	-0.36017				-0.94758	-0.27699	0.169024	3.957574	2.241497	-0.85073	-0.61184	-0.49694	-0.21062	-0.07239	0.093371
9.93327	-0.45127	-0.86274	0.206146	-0.07328	-0.36574	-0.45827	-0.3559	-1.42506	-1.47143	-0.52256	-0.40052				-0.92896	-0.24694	0.030022	3.976246	2.131267	-0.85692	-0.628	-0.52585	-0.19407	-0.11962	0.097809
9.94148	-0.42683	-0.88546	0.202443	-0.05717	-0.33443	-0.46328	-0.26535	-1.31973	-1.44143	-0.48613	-0.44107				-0.92835	-0.23583	-0.08682	3.96997	2.045246	-0.84535	-0.6287	-0.57042	-0.21787	-0.13078	0.040413
9.94968	-0.41605	-0.91027	0.227903	-0.03868	-0.29874	-0.48343	-0.15235	-1.25336	-1.32288	-0.4469	-0.4589				-0.94784	-0.25098	-0.09987	3.933905	2.010431	-0.82615	-0.62234	-0.5769	-0.2881	-0.08703	-0.04864
9.95788	-0.40594	-0.95669	0.238272	-0.02601	-0.27694	-0.50461	-0.01381	-1.24308	-1.1405	-0.3945	-0.44521				-0.96873	-0.30015	-0.01332	3.880686	2.016885	-0.81025	-0.63095	-0.50685	-0.39682	0.012221	-0.12111
9.96609	-0.38337	-1.03041	0.216052	-0.00665	-0.28104	-0.50863	0.145186	-1.28126	-0.93192	-0.31512	-0.40215				-0.96604	-0.35956	0.088771	3.822197	2.030362	-0.79374	-0.65335	-0.3841	-0.50722	0.157555	-0.15541
9.97429	-0.32739	-1.10127	0.1776	0.040063	-0.32397	-0.49592	0.308082	-1.34282	-0.71075	-0.18877	-0.31491				-0.94483	-0.39317	0.142167	3.771518	2.010125	-0.77683	-0.67963	-0.28023	-0.58039	0.339722	-0.16536
9.98249	-0.23237	-1.12589	0.149377	0.126537	-0.40206	-0.48005	0.452778	-1.41386	-0.46846	-0.02231	-0.16426				-0.93274	-0.39142	0.144699	3.732938	1.940168	-0.77461	-0.69147	-0.26887	-0.6147	0.557113	-0.1706
9.99061	-0.1212	-1.0768	0.129318	0.244882	-0.49104	-0.48046	0.561784	-1.45982	-0.19387	0.152401	0.043036				-0.91837	-0.3849	0.141741	3.689706	1.832006	-0.81	-0.68824	-0.34693	-0.64237	0.797101	-0.17196
9.99882	-0.0484	-0.98518	0.114798	0.362833	-0.56725	-0.51307	0.624573	-1.45333	0.099041	0.303278	0.266535				-0.87859	-0.41203	0.161512	3.619324	1.712336	-0.88606	-0.68196	-0.44537	-0.70464	1.040657	-0.1549
10.00702	-0.05984	-0.90748	0.102346	0.429051	-0.61613	-0.56721	0.649805	-1.40554	0.394123	0.41767	0.453361				-0.80443	-0.47079	0.195096	3.511806	1.621809	-0.96867	-0.68398	-0.50446	-0.79566	1.256531	-0.08837
10.01522	-0.14684	-0.86745	0.052722	0.406157	-0.64497	-0.61969	0.65712	-1.33848	0.688653	0.500632	0.585627				-0.72115	-0.53393	0.227566	3.389682	1.584584	-1.01696	-0.7069	-0.51781	-0.87699	1.415357	0.063345
10.02343	-0.26897	-0.84281	-0.04468	0.312488	-0.65668	-0.64024	0.664779	-1.26091	0.973108	0.549371	0.679969				-0.67646	-0.56648	0.253157	3.28481	1.593626	-1.02301	-0.74913	-0.52021	-0.91896	1.50399	0.322191
10.03163	-0.38192	-0.81116	-0.14784	0.205777	-0.64069	-0.62578	0.675532	-1.17677	1.21309	0.559538	0.761658				-0.69875	-0.54372	0.269736	3.215963	1.614417	-1.01255	-0.80156	-0.52523	-0.92579	1.533011	0.669377
10.03983	-0.45906	-0.77806	-0.20227	0.145473	-0.59839	-0.60239	0.679155	-1.10503	1.355614	0.538053	0.83422				-0.78483	-0.45751	0.265361	3.181432	1.614381	-1.01764	-0.84027	-0.52413	-0.94	1.531043	1.040096
10.04804	-0.49861	-0.75841	-0.20456	0.162309	-0.54791	-0.59807	0.668232	-1.07131	1.379518	0.518317	0.874685				-0.88303	-0.31709	0.247764	3.163882	1.575984	-1.04157	-0.84158	-0.49462	-0.99752	1.510356	1.357436
10.05624	-0.49379	-0.7663	-0.21155	0.223567	-0.51795	-0.62158	0.641521	-1.10136	1.298804	0.537619	0.869159				-0.95372	-0.17071	0.22026	3.140072	1.499907	-1.06433	-0.79919	-0.43428	-1.10254	1.47138	1.569168
10.06444	-0.45197	-0.80514	-0.25007	0.284652	-0.5124	-0.65005	0.605972	-1.19528	1.162803	0.591513	0.821552				-1.00298	-0.08375	0.186841	3.081039	1.402691	-1.06416	-0.73355	-0.37933	-1.22037	1.405808	1.673127
10.07264	-0.39447	-0.86167	-0.28945	0.320973	-0.51629	-0.65925	0.565426	-1.31906	1.025892	0.641488	0.761763				-1.05039	-0.10116	0.157797	2.985396	1.3076	-1.03845	-0.67535	-0.37343	-1.30206	1.307573	1.693452
10.08077	-0.35617	-0.91352	-0.25038	0.341739	-0.51001	-0.64881	0.523601	-1.4515	0.939408	0.648998	0.716916				-1.10094	-0.19399	0.148716	2.875453	1.236457	-1.00473	-0.63635	-0.44605	-1.31843	1.197254	1.659681
10.08897	-0.35156	-0.9471	-0.10492	0.368333	-0.49107	-0.63795	0.48263	-1.57641	0.947373	0.607665	0.681533				-1.12785	-0.28144	0.18486	2.789501	1.197043	-0.98036	-0.60564	-0.57121	-1.2648	1.101778	1.596465
10.09717	-0.36207	-0.98153	0.084323	0.407698	-0.48164	-0.63783	0.442037	-1.67127	1.045473	0.54382	0.631227				-1.12492	-0.32005	0.25196	2.752743	1.171284	-0.97796	-0.55525	-0.66836	-1.15756	1.041448	1.515233
10.10538	-0.37115	-1.03796	0.252977	0.45839	-0.49736	-0.64147	0.400263	-1.70304	1.161851	0.497548	0.55557				-1.12737	-0.31555	0.299936	2.759836	1.128429	-1.0042	-0.4746	-0.66912	-1.01535	1.010021	1.43069
10.11358	-0.36879	-1.11771	0.358644	0.499816	-0.53229	-0.63769	0.349899	-1.65992	1.208846	0.489781	0.477033				-1.18224	-0.31104	0.277317	2.79873	1.045124	-1.05061	-0.37869	-0.58681	-0.86126	0.98298	1.349874
10.12178	-0.36933	-1.18769	0.402729	0.512337	-0.56707	-0.62143	0.290226	-1.57015	1.163142	0.507393	0.42791				-1.29248	-0.32991	0.157453	2.842506	0.933848	-1.09601	-0.29429	-0.49742	-0.7264	0.945874	1.280789
10.12999	-0.38689	-1.22293	0.402127	0.476478	-0.58888	-0.59721	0.229631	-1.45798	1.057701	0.523098	0.420801				-1.40335	-0.35745	-0.01035	2.865887	0.830186	-1.11849	-0.24167	-0.4579	-0.64028	0.900734	1.233689
10.13819	-0.42594	-1.24428	0.37784	0.384119	-0.59515	-0.56527	0.176293	-1.35367	0.923549	0.504513	0.435061				-1.45329	-0.36827	-0.14636	2.845697	0.774573	-1.10749	-0.21588	-0.47697	-0.6106	0.86013	1.201749
10.14639	-0.47441	-1.28381	0.357348	0.264406	-0.58749	-0.52531	0.131996	-1.28158	0.772567	0.441418	0.439939				-1.41918	-0.34167	-0.18628	2.766681	0.767792	-1.06632	-0.19988	-0.51299	-0.61904	0.819135	1.165444
10.1546	-0.51171	-1.34617	0.358629	0.163764	-0.57697	-0.48458	0.089152	-1.25561	0.600659	0.357258	0.423428				-1.31756	-0.27093	-0.14511	2.647212	0.772327	-1.01968	-0.17915	-0.51408	-0.65369	0.756451	1.101676
10.1628	-0.52091	-1.39096	0.374939	0.117521	-0.57735	-0.45515	0.043924	-1.2615	0.422003	0.278465	0.39453				-1.17256	-0.16877	-0.1018	2.516255	0.754763	-0.99376	-0.15182	-0.44087	-0.70164	0.658557	1.010885
10.17092	-0.49154	-1.39398	0.377824	0.126354	-0.60486	-0.45124	-0.00143	-1.25036	0.255908	0.218567	0.365169				-1.02452	-0.07209	-0.11022	2.406213	0.705142	-1.00582	-0.12826	-0.27469	-0.75738	0.545479	0.921206
10.17912	-0.44223	-1.38022	0.364014	0.168859	-0.66793	-0.4705	-0.04682	-1.20082	0.10965	0.166119	0.333973				-0.92402	-0.03651	-0.16261	2.33956	0.643971	-1.04585	-0.12141	-0.04599	-0.82024	0.463683	0.861027
10.18732	-0.40305	-1.37947	0.340606	0.21642	-0.75833	-0.49904	-0.09396	-1.11017	0.003014	0.116855	0.299038				-0.90099	-0.09078	-0.19625	2.333506	0.588429	-1.08755	-0.14083	0.212821	-0.88881	0.433662	0.825464
10.19553	-0.4037	-1.39942	0.314807	0.242869	-0.85952	-0.52093	-0.14513	-0.99024	-0.02863	0.073483	0.257505				-0.96446	-0.21728	-0.16671	2.396597	0.530776	-1.10897	-0.18718	0.49167	-0.96585	0.424544	0.788037
10.20373	-0.45327	-1.41026	0.314868	0.228537	-0.94864	-0.52171	-0.19215	-0.85684	0.0406	0.037154	0.204286				-1.07947	-0.35438	-0.07178	2.513155	0.459476	-1.09688	-0.2459	0.811726	-1.03351	0.383463	0.729312
10.21194	-0.52331	-1.3863	0.384567	0.162001	-1.01066	-0.50146	-0.22573	-0.71266	0.183391	-0.00367	0.146113				-1.1995	-0.43319	0.056892	2.639741	0.380037	-1.0571	-0.3032	1.185569	-1.06207	0.302818	0.651781
10.22014	-0.57803	-1.32485	0.557496	0.077376	-1.02953	-0.47456	-0.24817	-0.55368	0.340793	-0.06981	0.09574				-1.28594	-0.41508	0.208483	2.72326	0.306903	-0.99629	-0.35145	1.573522	-1.02924	0.223239	0.577458
10.22834	-0.5793	-1.24259	0.791822	0.021444	-1.00541	-0.46268	-0.27264	-0.39677	0.471162	-0.16035	0.069855				-1.32384	-0.32935	0.364092	2.746418	0.238261	-0.92837	-0.38951	1.90723	-0.93518	0.185348	0.516331
10.23654	-0.5306	-1.16591	0.989963	0.031067	-0.95815	-0.47574	-0.31331	-0.30416	0.570444	-0.25518	0.070766				-1.33943	-0.24372	0.44407	2.733123	0.165731	-0.86765	-0.41852	2.105853	-0.80729	0.196309	0.459716
10.24475	-0.46587	-1.12458	1.032628	0.105299	-0.90783	-0.50711	-0.37058	-0.32743	0.664719	-0.34496	0.083791				-1.36227	-0.20845	0.386284	2.725907	0.089135	-0.81846	-0.44054	2.129546	-0.68038	0.231762	0.402383
10.25295	-0.42284	-1.14076	0.870316	0.203466	-0.86697	-0.54603	-0.4321	-0.47186	0.783079	-0.43271	0.090214				-1.41326	-0.22498	0.211056	2.745395	0.018134	-0.77923	-0.4675	2.00316	-0.5806	0.291805	0.348384
10.26111	-0.43679	-1.19456	0.579314	0.288148	-0.83253	-0.57939	-0.4754	-0.67926	0.94544	-0.51732	0.080077				-1.46311	-0.25981	0.035663	2.771407	-0.03715	-0.73853	-0.50088	1.806192	-0.50807	0.399307	0.308935
10.26927	-0.50937	-1.24362	0.269997	0.338667	-0.80777	-0.60504	-0.4948	-0.85047	1.144659	-0.57424	0.063237				-1.44634	-0.30105	-0.02781	2.780479	-0.08303	-0.69836	-0.534	1.655997	-0.45122	0.559989	0.286291
10.27748	-0.61278	-1.2521	0.024438	0.363074	-0.79344	-0.62997	-0.50628	-0.91021	1.338428	-0.58215	0.044256				-1.3435	-0.36715	0.04173	2.773485	-0.13021	-0.67003	-0.55696	1.631325	-0.40677	0.74985	0.27494
10.28568	-0.67521	-1.22511	-0.16312	0.365829	-0.78209	-0.65598	-0.53421	-0.85475	1.482765	-0.55459	0.017694				-1.19641	-0.46085	0.165846	2.782095	-0.18436	-0.66564	-0.56364	1.719763	-0.37573	0.929324	0.26412
10.29388	-0.61477	-1.20294	-0.31577	0.343637	-0.76949	-0.67826	-0.59148	-0.74819	1.577373	-0.54362	-0.01153				-1.09526	-0.54607	0.222173	2.831619	-0.23615	-0.68825	-0.55496	1.834911	-0.3645	1.074724	0.240519
10.30209	-0.40055	-1.20804	-0.41085	0.312141	-0.75158	-0.69098	-0.6604	-0.64732	1.673509	-0.5858	-0.03535				-1.09216	-0.57449	0.177251	2.913522	-0.27953	-0.7247	-0.53314	1.895826	-0.36797	1.163866	0.208423
10.31029	-0.06577	-1.2387	-0.40104	0.287089	-0.73199	-0.69665	-0.71747	-0.60554	1.816336	-0.66719	-0.05094				-1.16864	-0.54846	0.081176	3.000052	-0.32192	-0.74926	-0.50266	1.872444	-0.37325	1.186619	0.171552
10.31849	0.284096	-1.27588	-0.27945	0.29098	-0.72042	-0.70505	-0.74518	-0.65427	2.012742	-0.74862	-0.06407				-1.25483	-0.48702	0.018451	3.042904	-0.37467	-0.73788	-0.46559	1.771385	-0.37165	1.151604	0.130057
10.3267	0.555874	-1.30979	-0.12445	0.327109	-0.7369	-0.72837	-0.74442	-0.75995	2.237035	-0.7958	-0.0749				-1.28887	-0.40181	0.053274	3.022938	-0.45786	-0.69243	-0.44236	1.60683	-0.38168	1.083201	0.081878
10.3349	0.702309	-1.33378	-0.02533	0.362274	-0.7938	-0.75958	-0.72887	-0.85674	2.458296	-0.81684	-0.07936				-1.24382	-0.2925	0.165873	2.951682	-0.5691	-0.63827	-0.44416	1.383411	-0.43486	1.013544	0.028285
10.3431	0.724812	-1.33187	-0.0131	0.353818	-0.87764	-0.78355	-0.71383	-0.87097	2.665718	-0.83005	-0.07398				-1.10871	-0.16685	0.279312	2.861532	-0.67147	-0.60715	-0.46142	1.125518	-0.54811	0.965594	-0.02225
10.35131	0.663967	-1.31048	-0.0556	0.286241	-0.9577	-0.79775	-0.71906	-0.75357	2.845046	-0.83961	-0.0758				-0.90392	-0.07503	0.329076	2.79614	-0.71452	-0.61134	-0.47134	0.879842	-0.70215	0.941801	-0.07325
10.35943	0.581182	-1.28299	-0.09006	0.182998	-1.01163	-0.80902	-0.74864	-0.48273	2.972567	-0.83126	-0.11164				-0.68128	-0.05448	0.315896	2.778631	-0.67066	-0.64489	-0.46798	0.71101	-0.83164	0.92967	-0.13519
10.36763	0.525804	-1.25674	-0.06872	0.08224	-1.04703	-0.82481	-0.79198	-0.06621	3.019925	-0.78367	-0.17475				-0.51432	-0.10055	0.254285	2.806919	-0.57773	-0.70259	-0.47541	0.645559	-0.88328	0.911617	-0.21493
10.37583	0.49741	-1.22515	0.030224	0.016985	-1.07943	-0.83535	-0.82551	0.448008	2.980296	-0.70343	-0.22915				-0.44252	-0.18054	0.129427	2.853936	-0.49538	-0.77046	-0.5045	0.656204	-0.85485	0.873007	-0.29557
10.38404	0.476017	-1.18243	0.19053	-0.01104	-1.10206	-0.82926	-0.83669	0.984404	2.865125	-0.61323	-0.24748				-0.43315	-0.2587	-0.0555	2.897267	-0.46652	-0.83376	-0.55225	0.699939	-0.7974	0.812186	-0.34535
10.39224	0.439867	-1.1526	0.349417	-0.017	-1.08227	-0.80598	-0.83198	1.45296	2.692725	-0.53621	-0.24032				-0.41544	-0.31343	-0.21674	2.940466	-0.49159	-0.88046	-0.59853	0.724975	-0.77783	0.743588	-0.35098
10.40044	0.392865	-1.15904	0.420227	-0.00401	-1.00675	-0.77937	-0.82668	1.766385	2.495264	-0.47503	-0.23935				-0.3378	-0.32846	-0.215	2.994567	-0.54281	-0.90374	-0.63248	0.720698	-0.82381	0.668662	-0.3282
10.40865	0.349403	-1.20169	0.368551	0.031914	-0.9141	-0.76816	-0.83584	1.911061	2.293208	-0.40556	-0.26053				-0.21175	-0.29687	-0.01196	3.06052	-0.59544	-0.91037	-0.66035	0.710188	-0.92358	0.570304	-0.30557
10.41685	0.301197	-1.23991	0.248471	0.079312	-0.84567	-0.7739	-0.86522	1.900606	2.08809	-0.30302	-0.29459				-0.07878	-0.22616	0.258165	3.114465	-0.62483	-0.90909	-0.68346	0.722092	-1.03351	0.436963	-0.29185
10.42505	0.246449	-1.2303	0.140968	0.096929	-0.81183	-0.79306	-0.9096	1.752679	1.875292	-0.14887	-0.31582				0.026004	-0.15436	0.407899	3.137079	-0.619	-0.90847	-0.69586	0.780354	-1.11223	0.293929	-0.27614
10.43326	0.19477	-1.1603	0.107114	0.064643	-0.79335	-0.81772	-0.95147	1.498376	1.645992	0.042363	-0.30989				0.078814	-0.12293	0.376364	3.128345	-0.58976	-0.91304	-0.68738	0.881642	-1.14989	0.200865	-0.24104
10.44146	0.173547	-1.04566	0.137218	0.002287	-0.7785	-0.84641	-0.97854	1.216862	1.407453	0.233449	-0.28392				0.079389	-0.13492	0.261715	3.103043	-0.57579	-0.92364	-0.67021	1.015406	-1.15818	0.187557	-0.1826
10.44958	0.18565	-0.93398	0.187429	-0.04551	-0.77156	-0.88483	-0.99591	1.005158	1.174812	0.383058	-0.25735				0.021753	-0.16208	0.179453	3.070507	-0.59965	-0.93732	-0.67048	1.149524	-1.16669	0.23637	-0.11125
10.45778	0.205274	-0.88127	0.236621	-0.05314	-0.77266	-0.926	-1.01815	0.909661	0.965966	0.455459	-0.25794				-0.08025	-0.16759	0.163782	3.030888	-0.64391	-0.94186	-0.70964	1.241198	-1.19546	0.287504	-0.03447
10.46599	0.209424	-0.92721	0.29018	-0.04291	-0.78231	-0.95665	-1.05583	0.875045	0.791688	0.442871	-0.28744				-0.18787	-0.14747	0.165901	2.995433	-0.6749	-0.93354	-0.77963	1.266931	-1.25325	0.29038	0.034305
10.47419	0.178996	-1.0572	0.368983	-0.03664	-0.79759	-0.95884	-1.1012	0.792174	0.66692	0.373844	-0.32089				-0.25347	-0.11433	0.142786	2.97644	-0.67795	-0.92845	-0.83828	1.234621	-1.33453	0.234037	0.088513
10.48239	0.12744	-1.21431	0.446243	-0.04207	-0.82537	-0.93657	-1.13302	0.610121	0.603187	0.298188	-0.33079				-0.24683	-0.08552	0.112243	2.976391	-0.66841	-0.94687	-0.84288	1.181834	-1.41861	0.146869	0.126117
10.4906	0.080099	-1.32359	0.486007	-0.05408	-0.87737	-0.91168	-1.13734	0.354682	0.586637	0.240078	-0.31286				-0.19639	-0.06954	0.095994	2.972539	-0.65486	-0.9958	-0.78185	1.121169	-1.479	0.085512	0.147882
10.4988	0.056222	-1.328	0.478863	-0.07209	-0.94388	-0.90513	-1.11469	0.098342	0.580684	0.186414	-0.27669				-0.15501	-0.07021	0.108899	2.943996	-0.63329	-1.06028	-0.68665	1.047913	-1.49371	0.079237	0.155977
10.507	0.053681	-1.22801	0.427742	-0.10111	-1.00171	-0.91922	-1.07395	-0.11533	0.551803	0.10893	-0.21738				-0.15082	-0.10729	0.149748	2.889721	-0.60281	-1.12009	-0.59229	0.972525	-1.4675	0.114939	0.142273
10.51521	0.051799	-1.07045	0.352411	-0.10838	-1.03019	-0.93896	-1.02005	-0.28094	0.498394	0.006087	-0.11589				-0.16914	-0.18927	0.228873	2.811364	-0.5812	-1.1586	-0.52312	0.936459	-1.42527	0.165379	0.100719
10.52341	0.035742	-0.95407	0.258115	-0.05528	-1.02691	-0.94875	-0.96537	-0.40386	0.436074	-0.08473	0.028794				-0.19223	-0.30864	0.35768	2.734294	-0.59054	-1.16721	-0.49053	0.97216	-1.39895	0.224709	0.031947
10.53161	-0.00452	-0.95738	0.155118	0.054751	-0.9982	-0.93936	-0.92628	-0.49558	0.377961	-0.13514	0.174172				-0.22933	-0.43041	0.519109	2.67494	-0.62013	-1.14404	-0.49312	1.058288	-1.40983	0.309557	-0.04885
10.53973	-0.06343	-1.0803	0.068584	0.155114	-0.95259	-0.91696	-0.91126	-0.55504	0.324012	-0.15769	0.259088				-0.28461	-0.52245	0.683179	2.628524	-0.64356	-1.09874	-0.51947	1.136933	-1.454	0.417478	-0.11936
10.54794	-0.13313	-1.26581	0.018451	0.168628	-0.90094	-0.89206	-0.91771	-0.5965	0.277199	-0.19611	0.258974				-0.33539	-0.58277	0.80003	2.567404	-0.63424	-1.05567	-0.54461	1.152032	-1.50345	0.520347	-0.17038
10.55614	-0.21202	-1.4379	-0.00409	0.084244	-0.84479	-0.87057	-0.9308	-0.6431	0.264959	-0.26233	0.202736				-0.3462	-0.59587	0.867267	2.47403	-0.57965	-1.03477	-0.55118	1.109234	-1.5165	0.576095	-0.19397
10.56434	-0.28156	-1.55717	-0.03221	-0.05029	-0.79003	-0.85181	-0.94115	-0.72281	0.298126	-0.33755	0.140234				-0.31728	-0.54529	0.91029	2.371278	-0.48635	-1.04432	-0.53898	1.043449	-1.4834	0.561362	-0.19535
10.57254	-0.31411	-1.60745	-0.05876	-0.16297	-0.74535	-0.82932	-0.94738	-0.85606	0.351123	-0.40879	0.096307				-0.28303	-0.4389	0.943668	2.301878	-0.3754	-1.06696	-0.51562	0.976437	-1.42528	0.486861	-0.1877
10.58075	-0.30321	-1.58902	-0.05788	-0.23691	-0.72211	-0.80604	-0.95318	-1.01048	0.371019	-0.47405	0.065225				-0.27353	-0.31955	0.947149	2.286769	-0.29081	-1.08511	-0.48195	0.910611	-1.37576	0.384065	-0.18596
10.58895	-0.28213	-1.52724	-0.00422	-0.2924	-0.71217	-0.78934	-0.96283	-1.13483	0.329784	-0.54499	0.028403				-0.30042	-0.23878	0.893065	2.30013	-0.27614	-1.08793	-0.42548	0.829312	-1.34475	0.283804	-0.19856
10.59715	-0.28441	-1.45979	0.089569	-0.33572	-0.69446	-0.78343	-0.97555	-1.19269	0.246245	-0.61806	-0.01307				-0.34061	-0.20957	0.821094	2.294662	-0.35174	-1.08262	-0.3434	0.733591	-1.31852	0.201074	-0.22602
10.60536	-0.31839	-1.42097	0.18641	-0.34008	-0.65576	-0.7837	-0.98916	-1.18728	0.148176	-0.6705	-0.0414				-0.36898	-0.21031	0.823735	2.249904	-0.49484	-1.09076	-0.26162	0.641969	-1.30606	0.141143	-0.26639
10.61356	-0.36562	-1.4021	0.239584	-0.28219	-0.59542	-0.77733	-0.99297	-1.14726	0.052664	-0.68644	-0.05093				-0.35434	-0.21434	0.982605	2.175003	-0.6467	-1.11457	-0.212	0.595019	-1.32185	0.099519	-0.31539
10.62176	-0.39265	-1.37274	0.220697	-0.18626	-0.52661	-0.75994	-0.97562	-1.10128	-0.03343	-0.65964	-0.05162				-0.30507	-0.23145	1.286268	2.086478	-0.75309	-1.14122	-0.2056	0.618005	-1.35953	0.077198	-0.36522
10.62989	-0.39948	-1.3249	0.154516	-0.10073	-0.45693	-0.72921	-0.94194	-1.07511	-0.09224	-0.6003	-0.06306				-0.28055	-0.26392	1.638761	1.986704	-0.78694	-1.14759	-0.21224	0.681375	-1.38689	0.064282	-0.39586
10.63809	-0.40245	-1.28195	0.080033	-0.07398	-0.38862	-0.69077	-0.91465	-1.06183	-0.10931	-0.53471	-0.09098				-0.33831	-0.28064	1.916944	1.886113	-0.76674	-1.13308	-0.18771	0.742456	-1.37185	0.027568	-0.38936
10.64629	-0.42322	-1.27451	0.045438	-0.11243	-0.32258	-0.65806	-0.92093	-1.03624	-0.10003	-0.51063	-0.13084				-0.48874	-0.25045	2.049232	1.807369	-0.73801	-1.11795	-0.11382	0.762706	-1.31136	-0.05027	-0.35157
10.65449	-0.45801	-1.30692	0.067951	-0.19553	-0.25917	-0.63906	-0.97099	-0.9824	-0.09309	-0.56244	-0.18209				-0.65723	-0.17933	2.047168	1.756665	-0.74057	-1.11256	-0.01263	0.732685	-1.21209	-0.1488	-0.30867
10.6627	-0.47581	-1.36581	0.130552	-0.29251	-0.21216	-0.63762	-1.05353	-0.92739	-0.10924	-0.6859	-0.23709				-0.75942	-0.11302	1.976381	1.724006	-0.77968	-1.11267	0.061022	0.659638	-1.08929	-0.22033	-0.29857
10.6709	-0.45921	-1.4214	0.205205	-0.36222	-0.18921	-0.64443	-1.13706	-0.91983	-0.13873	-0.84783	-0.28428				-0.77303	-0.08412	1.930152	1.693426	-0.83342	-1.10675	0.069368	0.556882	-0.94661	-0.25043	-0.34139
[truncated: 2,968 more rows]
