# Supplementary material for: Functionally refined encoding of threat memory by distinct populations of basal forebrain cholinergic projection neurons
Source: eLife. 2024 Feb 16;13:e86581. doi: 10.7554/eLife.86581 (PMC10928508; doi:10.7554/eLife.86581)
Supplement: Supplementary file 1. — This file contains exact sample sizes for each group, group median, 95% confidence interval of the median, actual confidence interval, statistical test used, p-values, and test statistic for each of the reported plots in the manuscript. [file elife-86581-supp1.xlsx]

## Sheet: Sheet1
Figure	Panel	N (mice )	Group	Median	Actual CI [95%CI of median]	Statistical Test Used	Comparison(s)	p-value	Test-statistic
1	D, Left	11	BL	0.5653	98.83% CI [0.2900,0.7374]	Wilcoxon matched-pairs signed rank test	BL vs. Tone1	0.8311 (Two-tailed)	W=-6
			Tone1	0.4284	98.83% CI [0.2938,0.7222]
1	D, Right	11	BL	0.4919	98.83% CI [0.3583,0.8589]	Paired t-test	BL vs. Recall Tone	0.0039 (Two-tailed)	t=3.732, df=10
			Recall Tone	1.038	98.83% CI [0.3813,1.978]
1-Supplement1	D	11	BL	0.5653	98.83% CI [0.2900,0.7374]	Friedman Test		0.1381 (Approximate)	5.509
			Tone1	0.4284	98.83% CI [0.2938,0.7222]
			Tone2	0.7623	98.83% CI [0.2706,1.386]
			Tone3	0.6396	98.83% CI [0.4322,0.9123]
1-Supplement2	C, Left	5	BL	0.9357	93.75% CI [0.2744, 1368]	Paired t-test	BL vs. 24h Tone	0.8437 (Two-tailed)	t=0.2103, df=4
			Tone1	0.8056	93.75% CI [0.5277, 1.702]
1-Supplement2	C. Right	5	BL	0.8758	93.75% CI [0.5563, 1.091]	Paired t-test	BL vs. 24h Tone	0.3152 (Two-tailed)	t=1.147, df=4
			24h Tone	0.9613	93.75% CI [0.7106, 2.044]
				0.9613
1-Supplement3	C	5				RM One-way ANOVA		0.2418	F (2.381, 9.523)=1.657
1-Supplement3	D	5	BL	1.768	93.75% CI [0.5669, 4.293]	Paired t-test	BL vs. 24h Tone	0.7272 (Two-tailed)	t=0.3742, df=4
			24h Tone	1.645	93.75% CI [1.304, 3.908]
2	C	4	Homecage-Homecage (HC-HC)	13.5	87.5% CI [3.5, 24]	Kruskal-Wallis (w/ Dunn's correction)	Overall	0.0249	KW=6.185
		2	Tone alone- Tone alone (CS-CS)	1.75	50% CI [1.5, 2]		HC-HC vs. CS-CS	0.5012
		8	Tone+Shock - Tone (CS+US - CS)	22	99.22% CI [11, 100]		HC-HC vs. CS+US - CS	0.7231
							CS-CS vs. CS+US - CS	0.0464
2	D	3	Homecage-Homecage (HC-HC)	7	75% CI [2,14]	Kruskal-Wallis (w/ Dunn's correction)	Overall	0.9471	KW=0.1219
		3	Shock - Homecage (US - HC)	6	75% CI [6,9]
		4	Shock - Tone (US - CS)	7	87.5% CI [0,8]
2	C/D special	7	Homecage-Homecage (HC-HC)	7	98.44% CI [2,24]	Kruskal-Wallis (w/ Dunn's correction)	Overall	0.015	KW=10.52
		3	Shock - Homecage (US - HC)	6	75% CI [6,9]		CS+US - CS vs. HC-HC	0.066
		4	Shock - Tone (US - CS)	7	87.5% CI [0,8]		CS+US - CS vs. US-HC	0.058
		8	Tone+Shock - Tone (CS+US - CS)	22	99.22% CI [11,100]		CS+US - CS vs. US-CS	0.024
3	C	8	Sham			RM Two-way ANOVA (w/ Bonferroni correction)	Time x Group	0.6482	F (3, 39) = 0.5544
		7	ADCD-hM4Di				Time	<0.0001	F (2.035, 26.46) = 22.21
							Group	0.7311	F (1, 13) = 0.1233
3	D	8	Sham			RM Two-way ANOVA (w/ Bonferroni correction)	Time x Group	0.0052	F (1, 13) = 11.24
		7	ADCD-hM4Di				Time	0.0005	F (1, 13) = 20.81
							Group	0.0204	F (1, 13) = 6.969
							Pre Tone: Sham vs. ADCD-hM4Di	0.3544
							Tone: Sham vs. ADCD-hM4Di	0.0026
							Sham: Pre-tone vs. Tone	0.0001
							ADCD-hM4Di: Pre-tone vs. Tone	0.8451
4	D	2	Homecage-Homecage (HC-HC)	21.5	50% CI [19, 24]	Welch's t-test	HC-HC vs. CS+US-CS	0.5192 (Two-tailed)	t=0.8638, df=1.281
		5	Tone+Shock- Tone (CS+US-CS)	17	93.75% CI [17,21]
4	E	2	Homecage-Homecage (HC-HC)	3.5	50% CI [1,6]	Welch's t-test	HC-HC vs. CS+US-CS	0.0183 (Two-tailed)	t=3.908, df=3.896
		5	Tone+Shock- Tone (CS+US-CS)	20.5	87.5% CI [14,28]
5	B, top	5	Sham			RM Two-way ANOVA (w/ Bonferroni correction)	Time x Group	0.0047	F (1, 10) = 13.10
		7	cav.hM4DiBLA (DREADD)				Time	0.0001	F (1, 10) = 37.44
							Group	0.0007	F (1, 10) = 23.36
							Pre Tone: Sham vs. DREADD	0.0679
							Tone: Sham vs. DREADD	<0.0001
							Sham: Pre-tone vs. Tone	0.0002
							DREADD: Pre-tone vs. Tone	0.1633
5	B, bottom	7	Sham	0.3475	98.44% CI [0.15,0.64]	Mann-Whitney	Sham vs. DREADD	0.0286 (exact)	U=7.5
		7	cav.hM4DiBLA (DREADD)	0.12	98.44% CI [0.06,0.3]
5	C, top	9	Sham			RM Two-way ANOVA (w/ Bonferroni correction)	Time x Group	0.2293	F (1, 13) = 1.592
		6	cav.hM4DiBLA (DREADD)				Time	<0.0001	F (1, 13) = 87.99
							Group	0.0312	F (1, 13) = 5.835
							Pre Tone: Sham vs. DREADD	0.0966
							Tone: Sham vs. DREADD	0.0279
							Sham: Pre-tone vs. Tone	<0.0001
							DREADD: Pre-tone vs. Tone	0.0003
5	C, bottom	4	Sham	0.27	87.5% CI [0.17,0.3]	Mann-Whitney	Sham vs. DREADD	0.0317 (exact)	U=1
		5	cav.hM4DiBLA (DREADD)	0.13	93.75% CI [0.08,0.18]
5-Supplement1	C	3	Sham	0.633	75% CI [0.63,0.847]	Welch's t-test	Sham vs. DREADD	0.0091 (Two-tailed)	t=4.802, df=3.913
		3	cav.hM4DiBLA (DREADD)	0.2	75% CI [0.174,0.371]
5-Supplement1	D	3	Sham			RM Two-way ANOVA (w/ Bonferroni correction)	Time x Group	0.3533	F (1, 4) = 1.101
		3	cav.hM4DiBLA (DREADD)				Time	0.1051	F (1, 4) = 4.359
							Group	0.5962	F (1, 4) = 0.3304
5-Supplement1	E	9	Sham			RM Two-way ANOVA (w/ Bonferroni correction)	Time x Group	0.144	F (1, 11) = 2.475
		4	cav.hM4DiCeA (DREADD)				Time	<0.0001	F (1, 11) = 47.61
							Group	0.9425	F (1, 11) = 0.005449
							Sham: Pre-tone vs. Tone	0.0011
							DREADD: Pre-tone vs. Tone	0.0007
5-Supplement2	A	5	Sham			RM Two-way ANOVA (w/ Bonferroni correction)	Time x Group	0.0017	F (1, 7) = 24.14
		4	aav.hM4DiNBM (DREADD)				Time	0.0032	F (1, 7) = 19.17
							Group	0.0966	F (1, 7) = 3.680
							Pre Tone: Sham vs. DREADD	>0.9999
							Tone: Sham vs. DREADD	0.0058
							Sham: Pre-tone vs. Tone	0.0004
							DREADD: Pre-tone vs. Tone	>0.9999
5-Supplement2	B	3	Sham			RM Two-way ANOVA (w/ Bonferroni correction)	Time x Group	0.0621	F (1, 5) = 5.729
		4	aav.hM4DiVP (DREADD)				Time	0.0011	F (1, 5) = 44.76
							Group	0.1574	F (1, 5) = 2.762
6	B	9	High responder			RM Two-way ANOVA (w/ Bonferroni correction)	Time x Group	0.0001	F (9, 144) = 4.103
		9	Low responder				Time	0.0042	F (2.349, 37.58) = 5.851
							Group	0.2575	F (1, 16) = 1.379
							High responder: T0 vs. T120	0.0242
							High responder: T60 vs. T120	0.0099
							High responder: T90 vs. T120	0.0016
							All Low responder comparisons	>0.9999
6	D	8	High responder	2.65	99.22% CI [1.32, 5.6]	Mann-Whitney Test	High vs. Low responder	0.0121 (Two-tailed)	U=0
		3	Low responder	1.21	75% CI [0.84,1.3]
7	D	10 cells/ 10 mice	Homecage (Chat+) - HC	2.25	97.85% CI [1.25, 4.10]	Kruskal-Wallis test (w/ Dunn's posthoc test)	AP-half width	0.0054	KW=10.43
		10 cells / 5 mice	Recall (Chat+Fos-) - Fos-	2.63	97.85% CI [0.87, 4.60]		HC vs. Fos-	0.8971
		11 cells/ 6 mice	Recall (Chat+Fos+) - Fos+	0.89	98.83% CI [0.58, 1.4]		HC vs. Fos+	0.0006
							Fos- vs. Fos+	0.0206
7	E	10 cells/ 10 mice	Homecage (Chat+) - HC	65	97.85% CI [40.0, 100.0]	Kruskal-Wallis test (w/ Dunn's posthoc test)	Rheobase	0.05	KW=5.677
		10 cells / 5 mice	Recall (Chat+Fos-) - Fos-	80	97.85% CI [50.0, 120.0]		HC vs. Fos-	0.6153
		11 cells/ 6 mice	Recall (Chat+Fos+) - Fos+	45	98.83% CI [0.00, 65.0]		HC vs. Fos+	0.0938
							Fos- vs. Fos+	0.0228
7	F	11 cells/ 11 mice	Homecage (Chat+) - HC	26	98.83% CI [4.0, 34.0]	Kruskal-Wallis test (w/ Dunn's posthoc test)	Max Firing Rate	0.0032	KW=11.48
		10 cells / 5 mice	Recall (Chat+Fos-) - Fos-	16	97.85% CI [4.0, 26.0]		HC vs. Fos-	0.3206
		11 cells/ 6 mice	Recall (Chat+Fos+) - Fos+	106	98.83% CI [14.0, 141.0]		HC vs. Fos+	0.003
							Fos- vs. Fos+	0.0034
7-Supplement1	A	11 cells/ 11 mice	Homecage (Chat+) - HC	-58.3	98.83% CI [-63.80, -54.60]	Kruskal-Wallis test (w/ Dunn's posthoc test)	RMP	0.5272	KW=1.280
		10 cells / 5 mice	Recall (Chat+Fos-) - Fos-	-60.22	97.85% CI [-68.0, -55.0]
		11 cells/ 6 mice	Recall (Chat+Fos+) - Fos+	-61.55	98.83% CI [-67.17, -53.12]
7-Supplement1	B	10 cells/ 10 mice	Homecage (Chat+) - HC	50.9	97.85% CI [36.30, 75.49]	Kruskal-Wallis test (w/ Dunn's posthoc test)	AP Amplitude	0.1457	KW=3.852
		10 cells / 5 mice	Recall (Chat+Fos-) - Fos-	65.74	97.85% CI [40.0, 99.50]
		11 cells/ 6 mice	Recall (Chat+Fos+) - Fos+	72.95	98.83% CI [45.99, 90.71]
7-Supplement1	C	11 cells/ 11 mice	Homecage (Chat+) - HC	-44.8	98.08% CI [-54.43, -38.20]	Kruskal-Wallis test (w/ Dunn's posthoc test)	Threshold	0.9635	KW=0.07439
		10 cells / 5 mice	Recall (Chat+Fos-) - Fos-	-44.19	97.85% CI [-52.4, -37.0]
		11 cells/ 6 mice	Recall (Chat+Fos+) - Fos+	-46.43	98.83% CI [-55.25, -36.68]
7-Supplement1	D	11 cells/ 11 mice	Homecage (Chat+) - HC	9.5	98.83% CI [4.48, 81.65]	Kruskal-Wallis test (w/ Dunn's posthoc test)	AHP half-width	0.3235	KW=2.257
		10 cells / 5 mice	Recall (Chat+Fos-) - Fos-	15.71	99.22% CI [4.72, 84.0]
		11 cells/ 6 mice	Recall (Chat+Fos+) - Fos+	8.48	97.85% CI [3.37, 15.0]
7-Supplement1	E	11 cells/ 11 mice	Homecage (Chat+) - HC	31.7	98.83% CI [1.66, 147.0]	Kruskal-Wallis test (w/ Dunn's posthoc test)	AP Latency	0.012	KW=8.843
		10 cells / 5 mice	Recall (Chat+Fos-) - Fos-	4.2	97.85% CI [0.97, 6.5]		HC vs. Fos-	0.0163
		11 cells/ 6 mice	Recall (Chat+Fos+) - Fos+	1.805	97.85% CI [0.65, 9.0]		HC vs. Fos+	0.0062
							Fos- vs. Fos+	0.7394
7-Supplement1	F	11 cells/ 11 mice	Homecage (Chat+) - HC	7.9	98.83% CI [5.50, 12.65]	Kruskal-Wallis test (w/ Dunn's posthoc test)	AHP Amplitude	0.0174	KW=8.107
		10 cells / 5 mice	Recall (Chat+Fos-) - Fos-	11.7	96.09% CI [1.70, 15.95]		HC vs. Fos-	0.3702
		11 cells/ 6 mice	Recall (Chat+Fos+) - Fos+	19.3	98.83% CI [7.510, 23.0]		HC vs. Fos+	0.0041
							Fos- vs. Fos+	0.0952
7-Supplement1	G	18 cells/14 mice	Homecage (Chat+) - HC	13	96.91% CI [4.0, 28.0]	Kruskal-Wallis test (w/ Dunn's posthoc test)	Max Firing Rate	0.0011	KW=18.24
		5 cells/3 mice	Training (Chat+Fos+) - Training	2	93.75% CI [2.0, 4.0]		HC vs. Training	0.717
		11 cells/6 mice	Recall (Chat+Fos+) - D0	106	98.83% CI [14.0, 141.0]		HC vs. D0	0.0005
		10 cells/3 mice	Recall D3 - D3	22	98.83% CI [12.0, 62.0]		HC vs. D3	>0.99
		13 cells/3 mice	Recall D5 - D5	8	97.75% CI [1.0, 34.0]		HC vs. D5	>0.99
							Training vs. D0	0.0076
							Training vs. D3	0.1774
							Training vs. D5	>0.99
							D0 vs. D3	0.0219
							D0 vs. D5	0.0036
							D3 vs. D5	>0.99
8	A	9	Saline	0	96.09% CI [0, 3]	Mann-Whitmey Test	Freezing- Saline vs. Predator odor	0.028 (Two-tailed)	U=9
		6	Predator Odor	17.5	96.88% CI [0, 62]
8	B	7	Saline	17	98.44% CI [10, 29]	Mann-Whitmey Test	VP/SIa - Saline vs. Predator odor	0.0023 (Two-tailed)	U=1
		6	Predator Odor	37.5	96.88% CI [25, 47]
8	D	6	Sham	12	96.88% CI [7, 13]	Mann-Whitmey Test	Sham vs. DREADD	0.019 (Two-tailed)	U=1.5
		4	cav.hM4DiBLA (DREADD)	0	87.5% CI [0, 8]
8-Supplement1	A	7	Saline	22	98.44% CI [10, 31]	Mann-Whitmey Test	NBM- Saline vs. Predator odor	0.4441 (Two-tailed)	U=15
		6	Predator Odor	25.5	96.88% CI [19, 45]
8-Supplement1	A	7	Saline	38	98.44% CI [28, 52]	Mann-Whitmey Test	HDB- Saline vs. Predator odor	0.2465 (Two-tailed)	U=12.5
		6	Predator Odor	48.5	96.88% CI [36, 54]
8-Supplement1	B	9	Saline	25	96.09% CI [11, 38]	Mann-Whitmey Test	Cloth contacts- Saline vs. Predator odor	0.0012 (Two-tailed)	U=2
		6	Predator Odor	2.5	96.88% CI [0, 10]
8-Supplement1	B	9	Saline	2	96.09% CI [0, 9]	Mann-Whitmey Test	Digging - Saline vs. Predator odor	0.023 (Two-tailed)	U=8
		6	Predator Odor	16	96.88% CI [4, 26]
8-Supplement1	C	6	Sham	0	96.88% CI [0, 2]	Mann-Whitmey Test	Cloth contacts- Saline vs. Predator odor	0.8485 (Two-tailed)	U=12.5
		5	cav.hM4DiBLA (DREADD)	0	93.75% CI [0, 1]
8-Supplement1	C	6	Sham	5	96.88% CI [0, 8]	Mann-Whitmey Test	Digging - Saline vs. Predator odor	0.0714 (Two-tailed)	U=5
		5	cav.hM4DiBLA (DREADD)	20	93.75% CI [2, 41]
