# Supplementary figures and images for: Functionally refined encoding of threat memory by distinct populations of basal forebrain cholinergic projection neurons
Source: eLife journal article supplement (doi:10.7554/elife.86581), 2024-02-16

Figure 3-Supplement 1

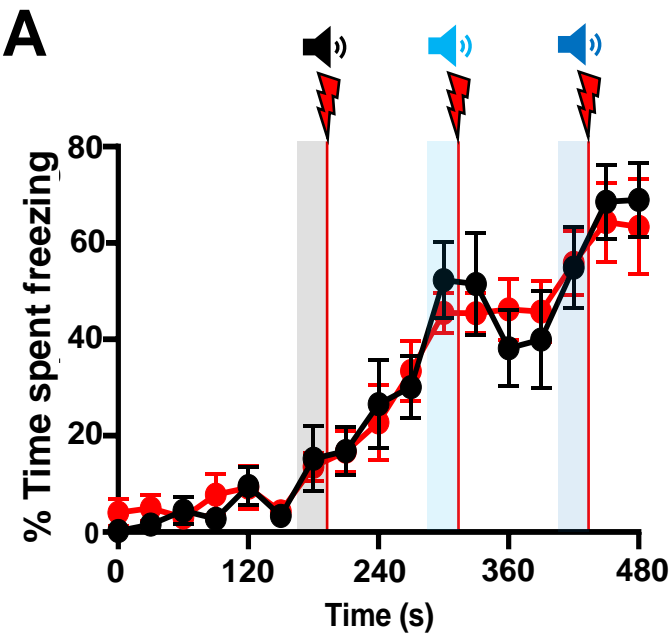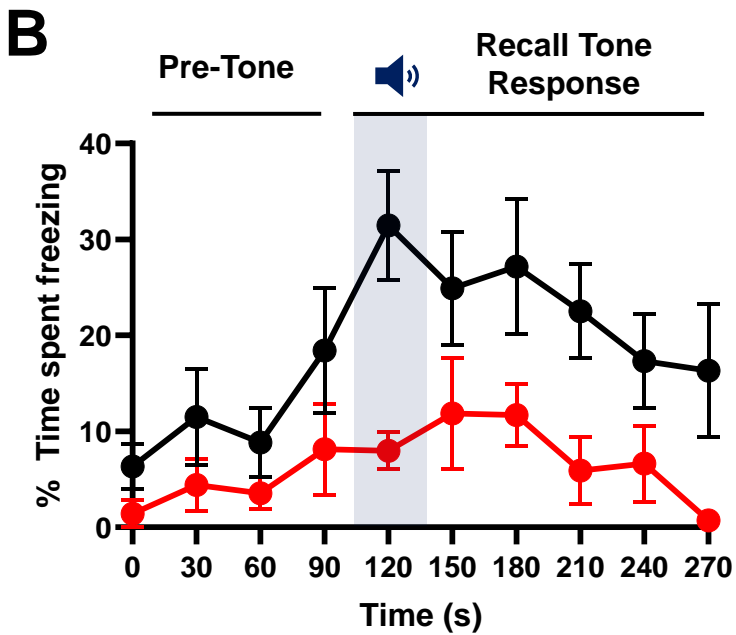

Supplement: supp [file elife-86581-supp-v1.zip]

Figure 1-Supplement 2

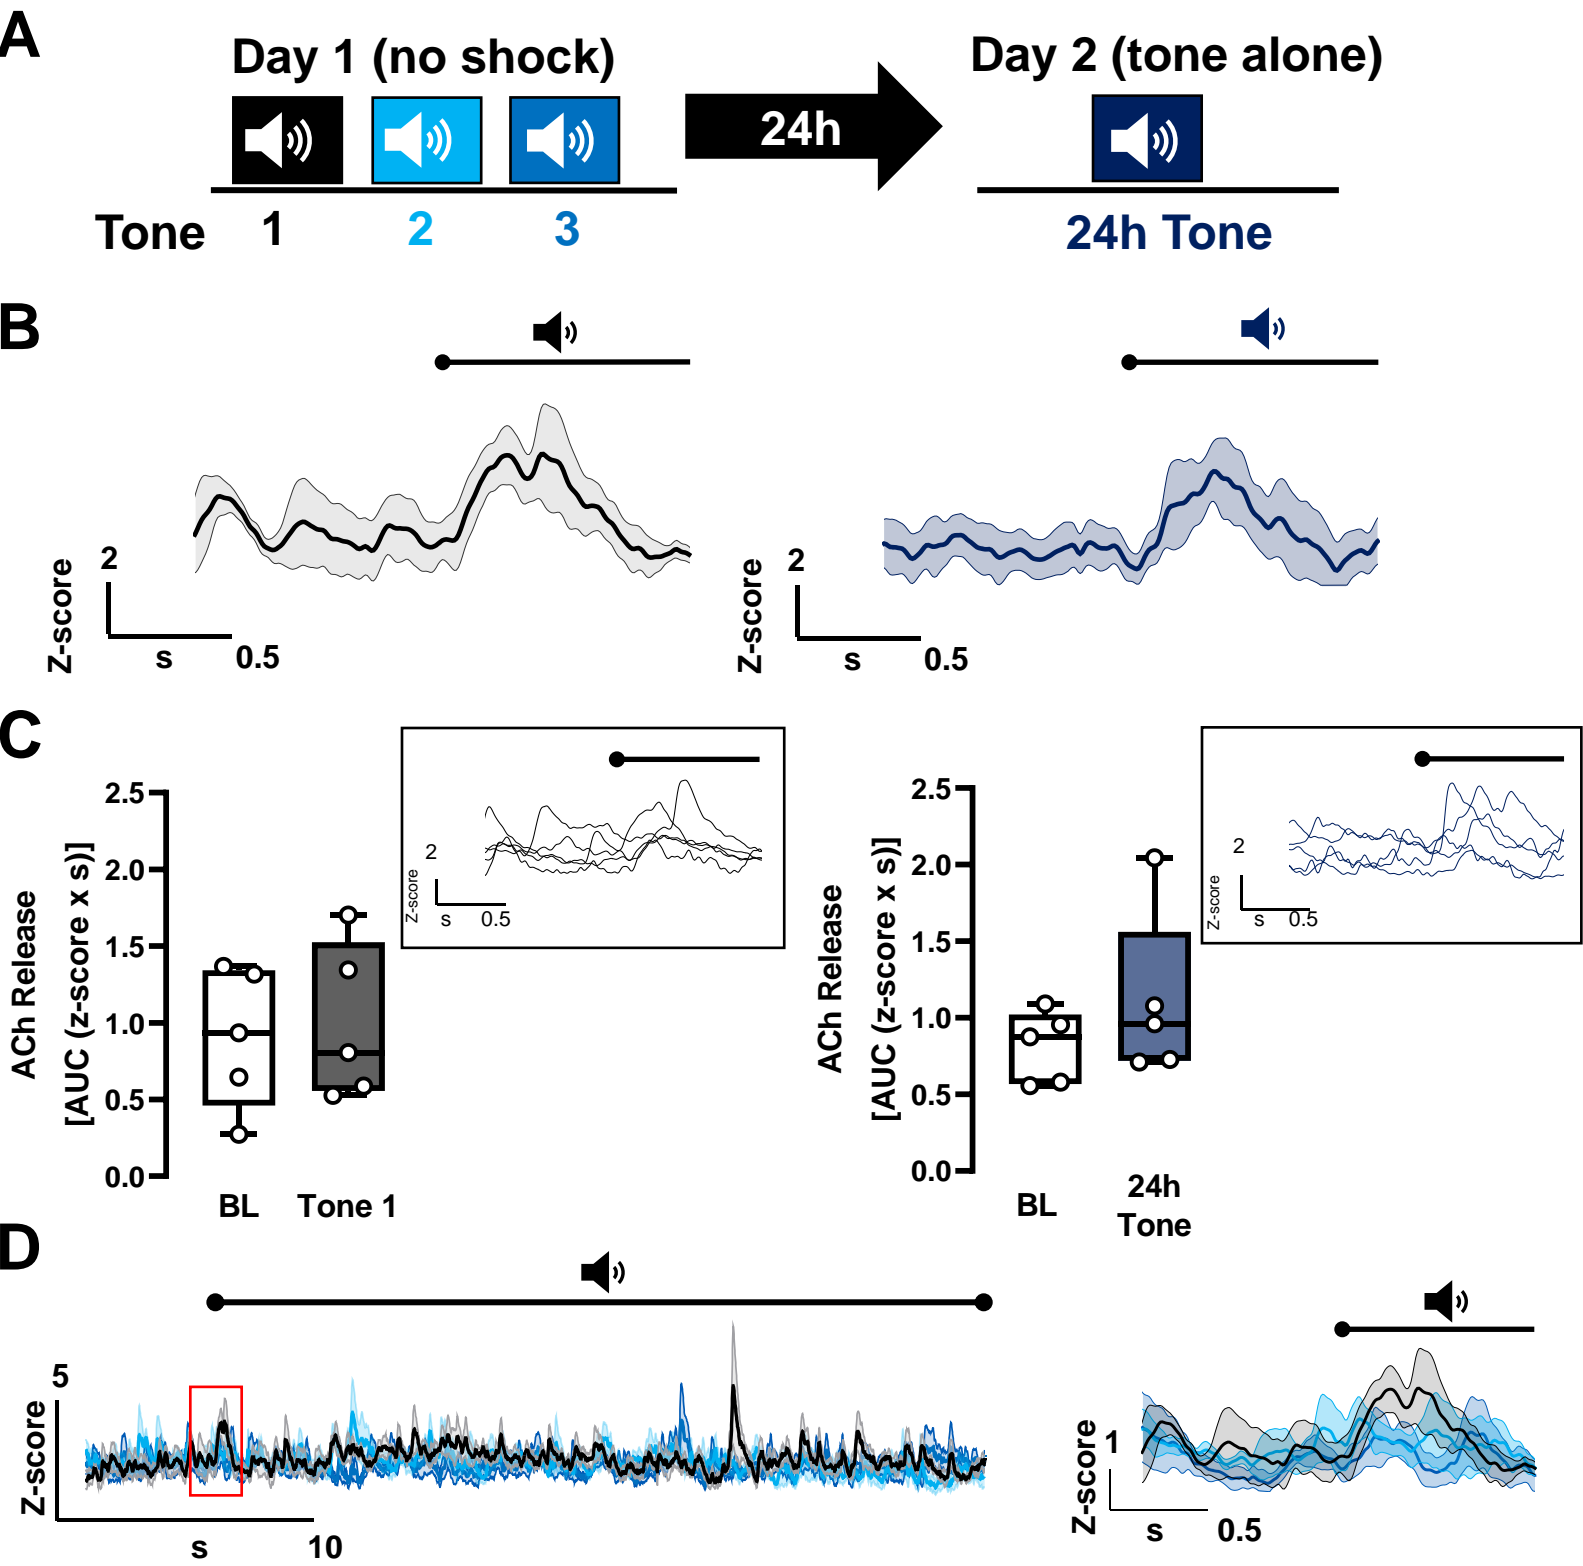

Supplement: supp [file elife-86581-supp-v1.zip]

# Figure 5-Supplement 1

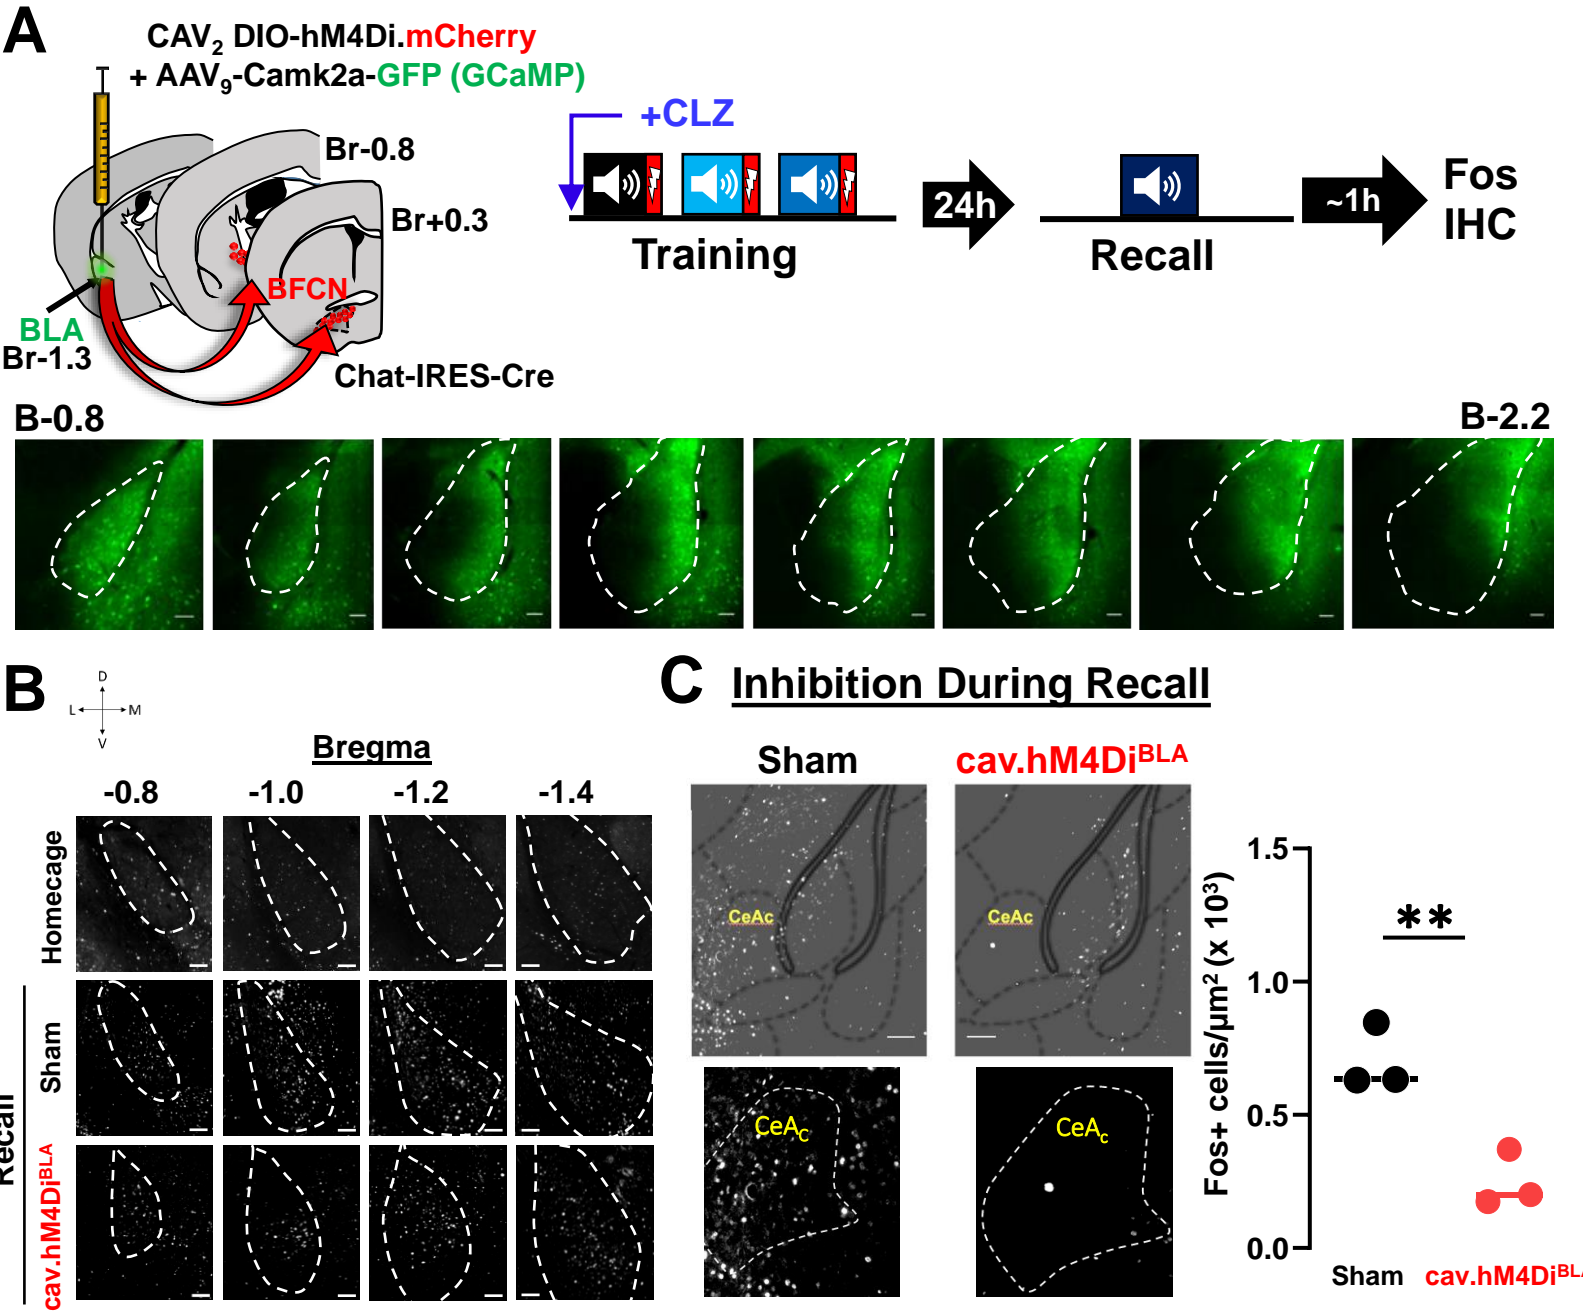

Supplement: supp [file elife-86581-supp-v1.zip]

Figure 6-Supplement 2

A

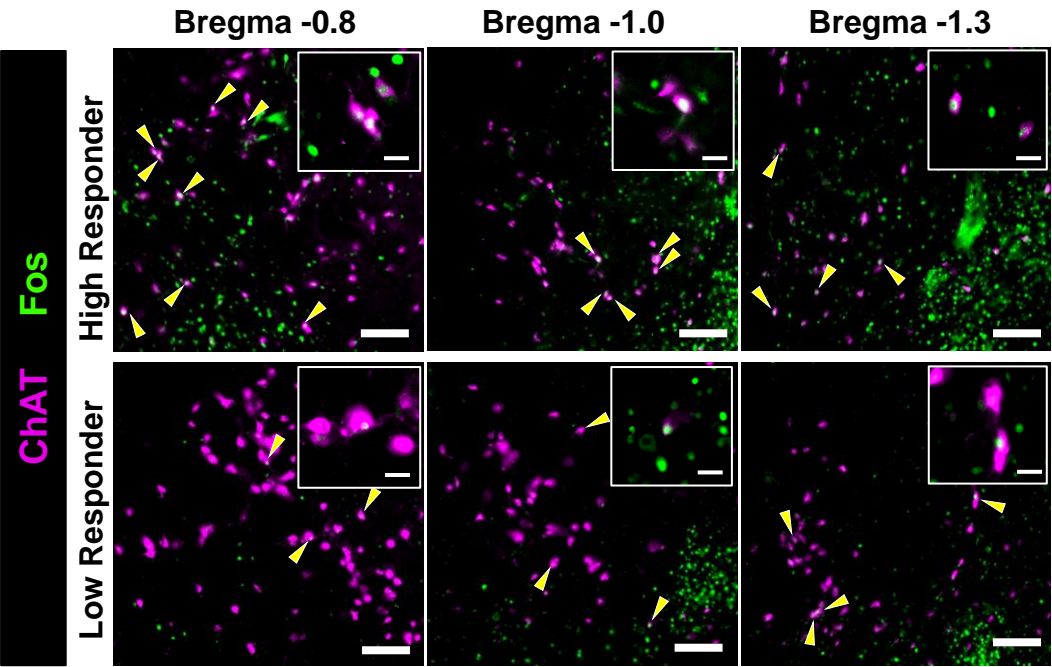

B

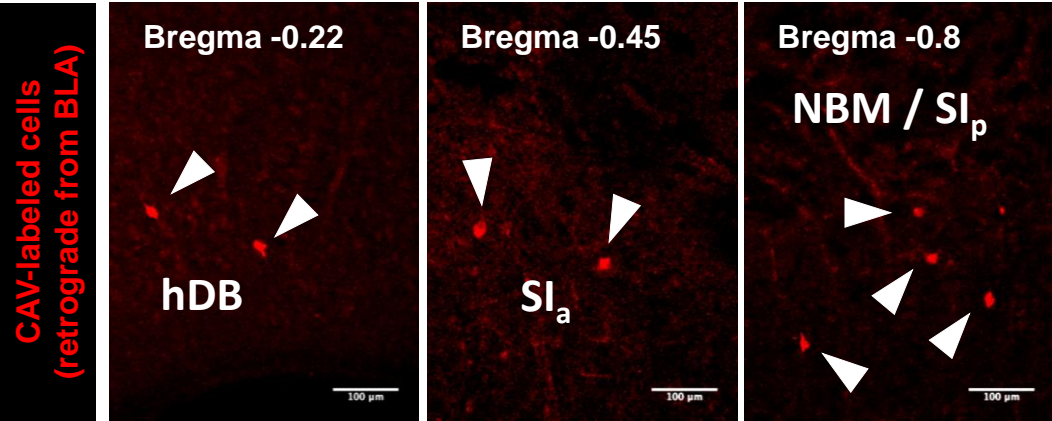

C

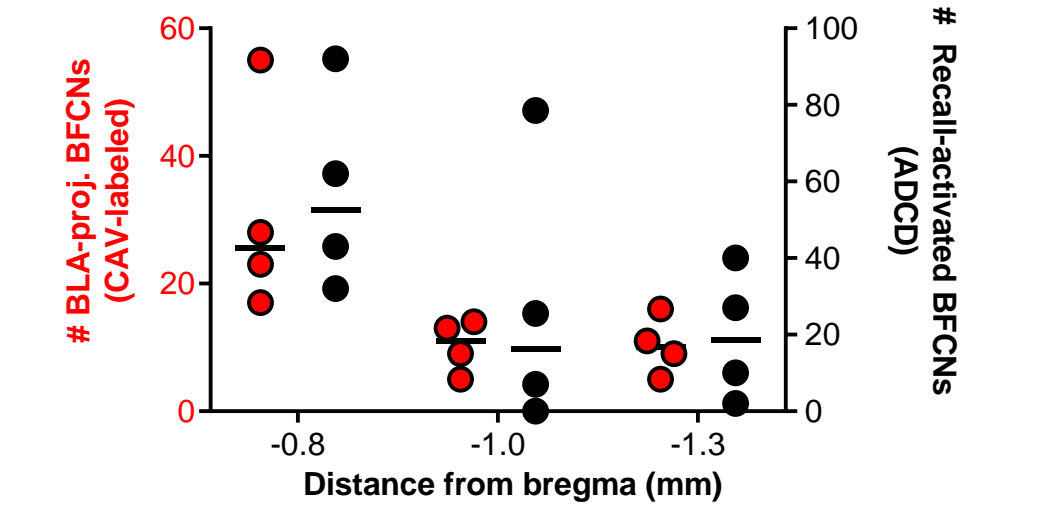

Supplement: supp [file elife-86581-supp-v1.zip]

Figure 7-Supplement 1

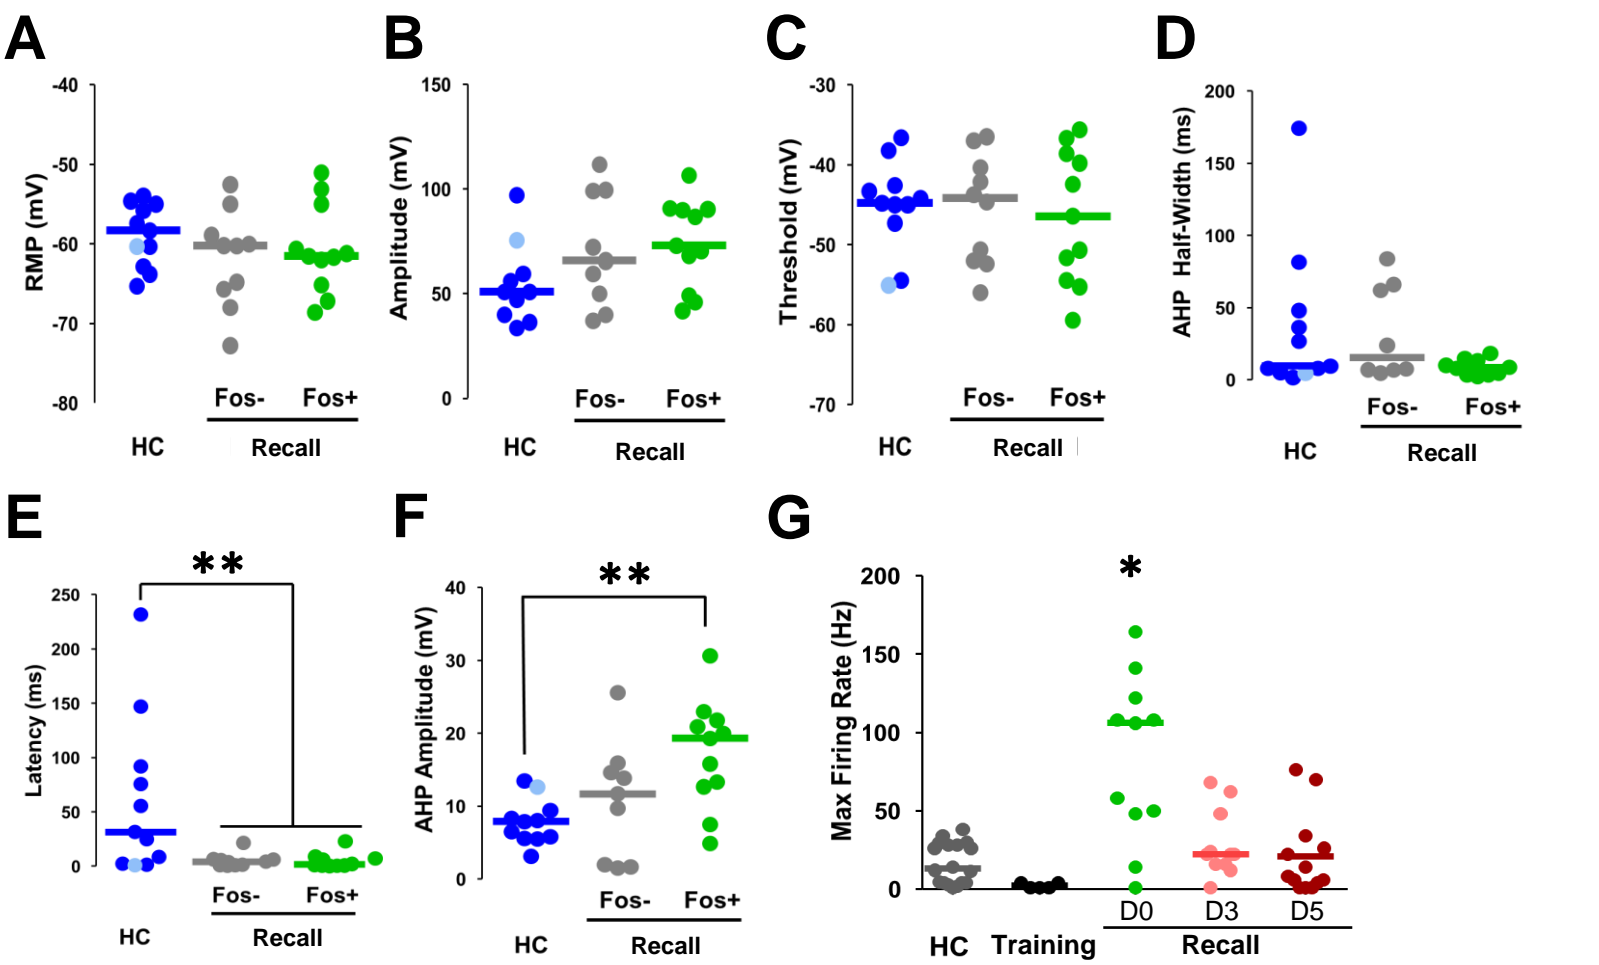

Supplement: supp [file elife-86581-supp-v1.zip]

Figure 1-Supplement 3

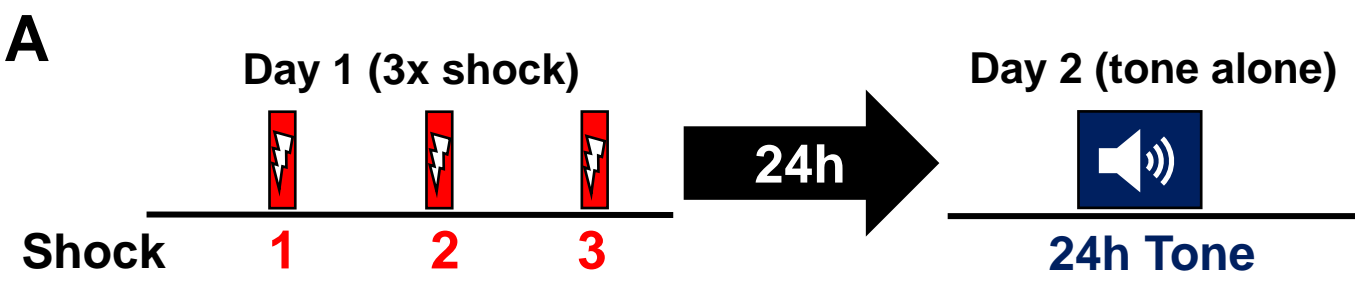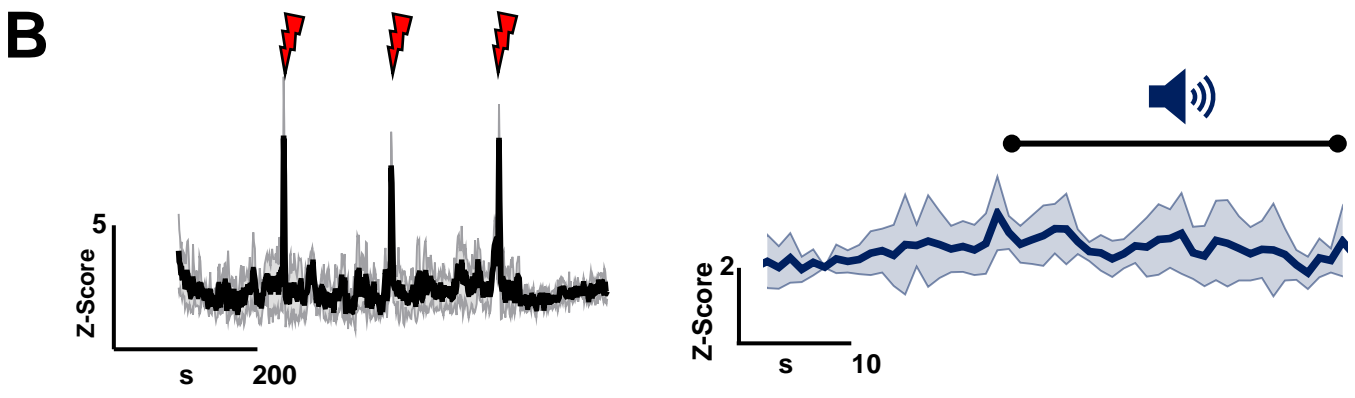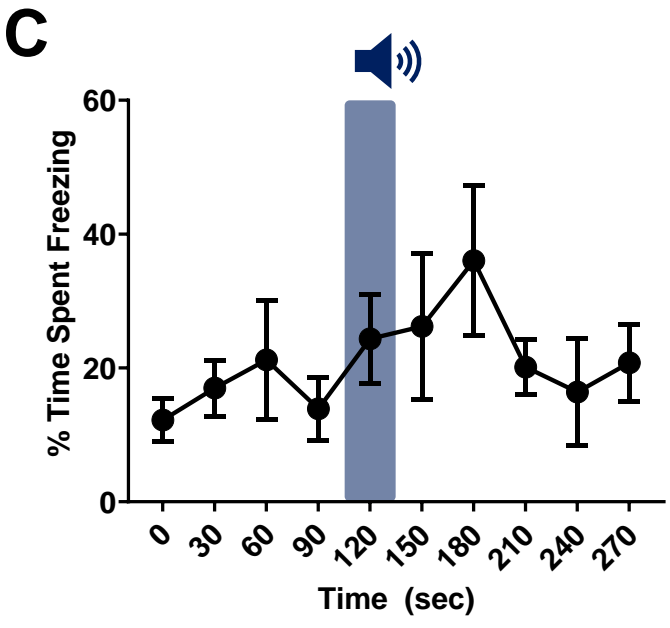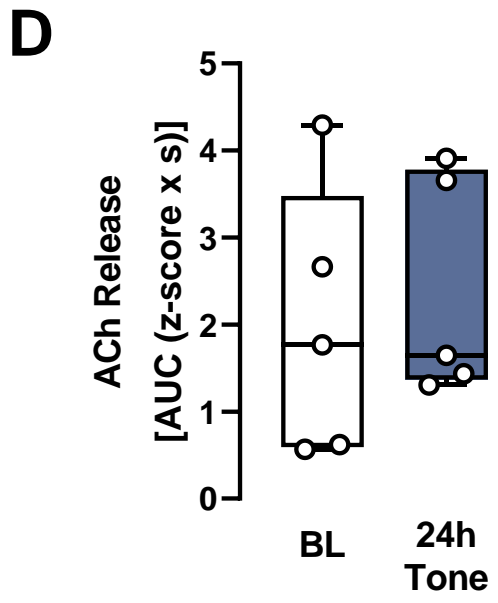

Supplement: supp [file elife-86581-supp-v1.zip]

Figure 6-Supplement 1

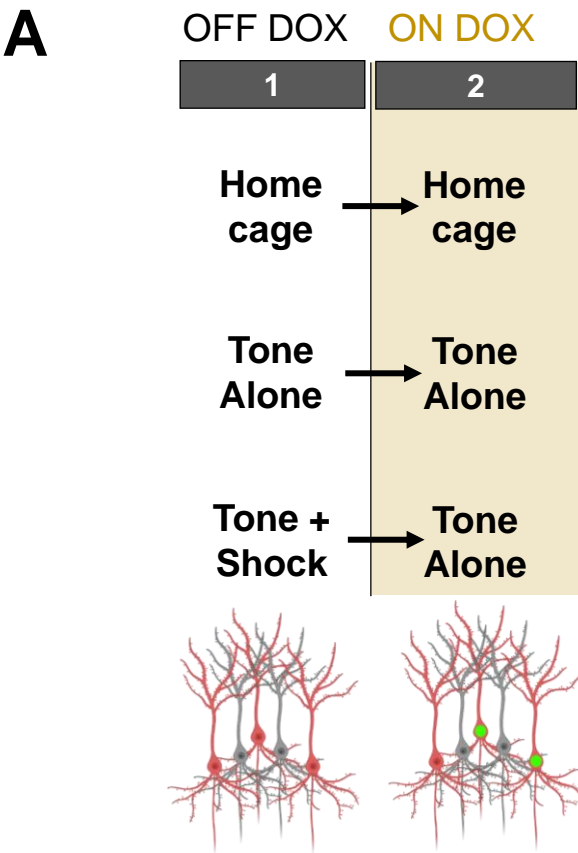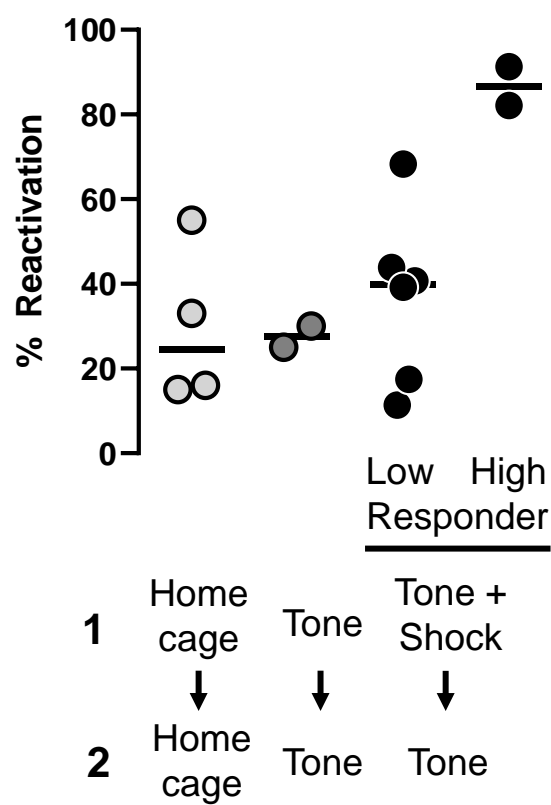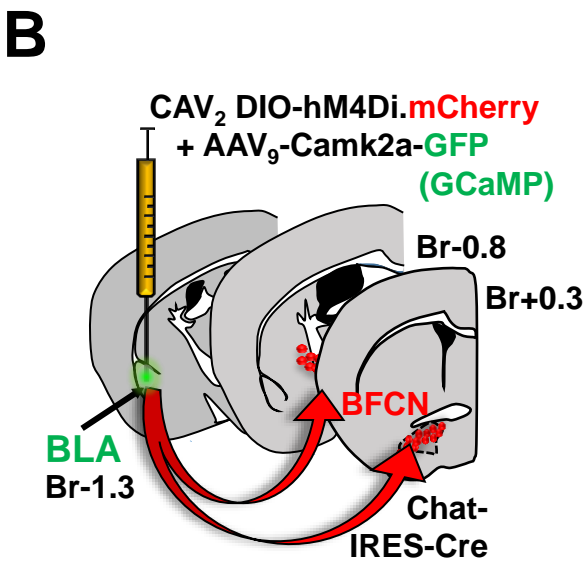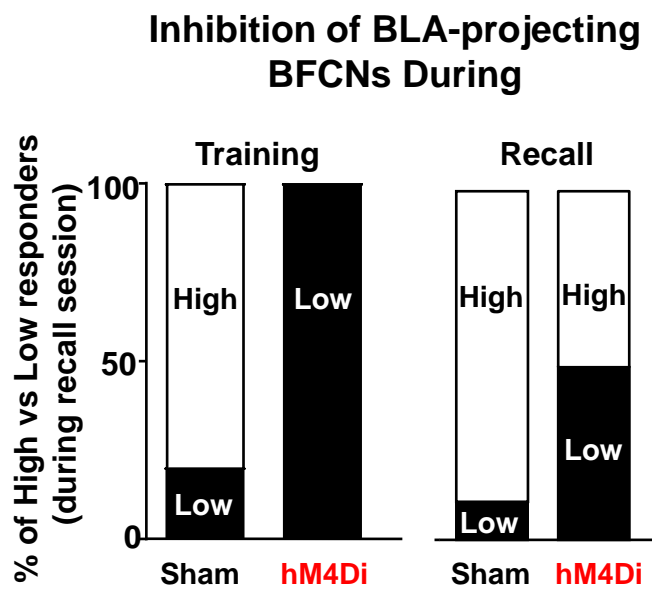

Supplement: supp [file elife-86581-supp-v1.zip]

Figure 8-Supplement 1

A

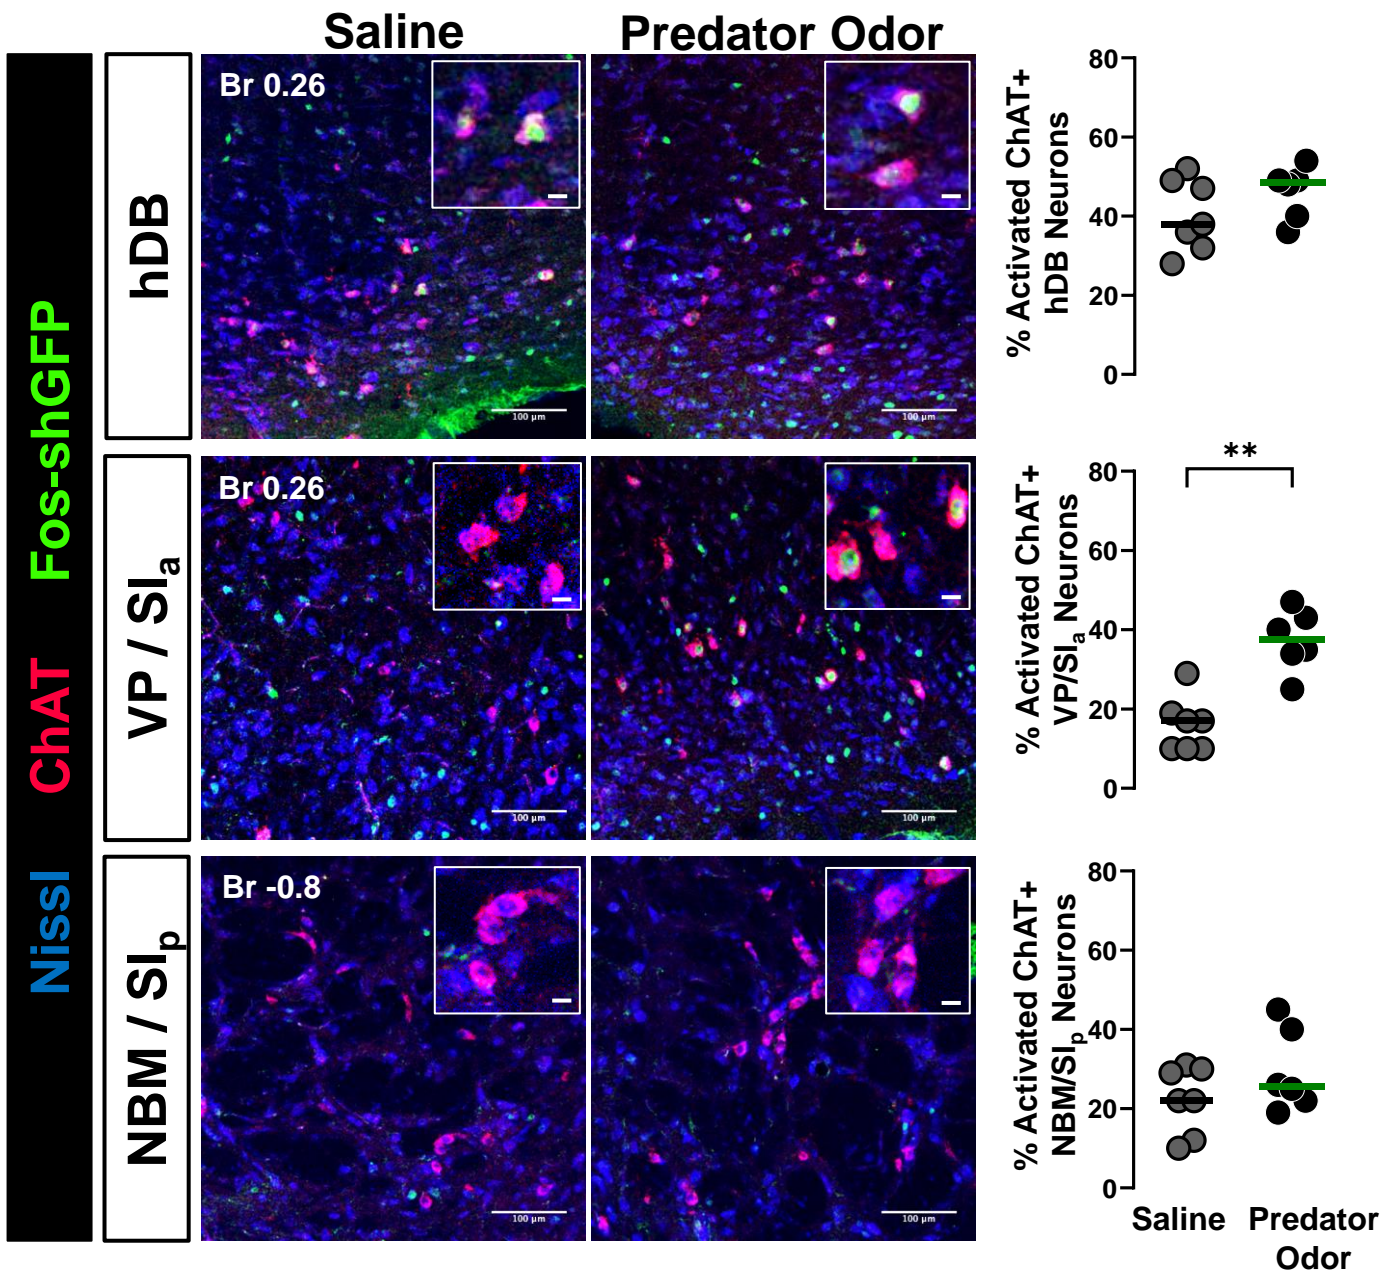

B

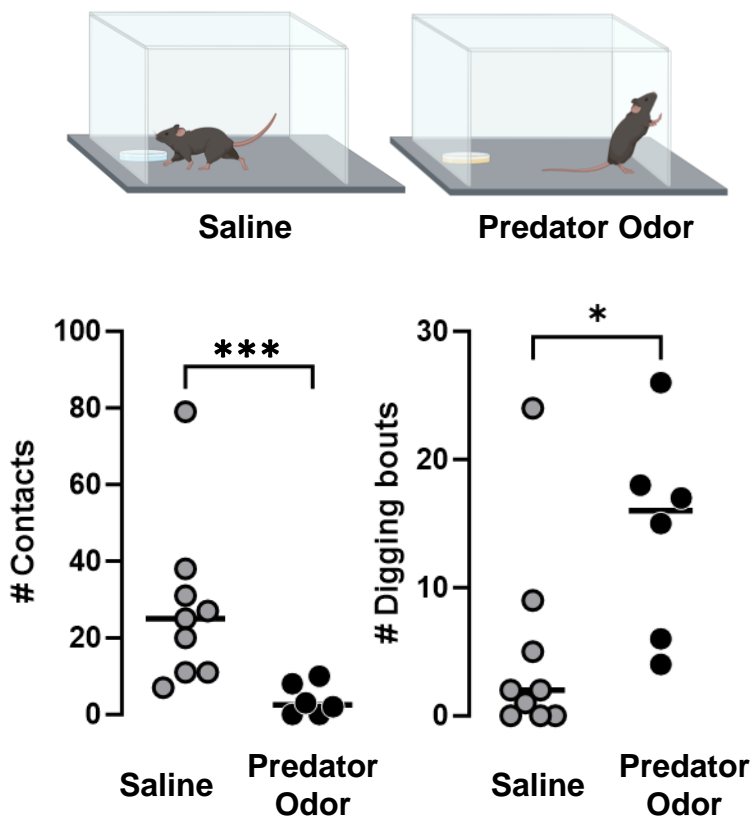

C

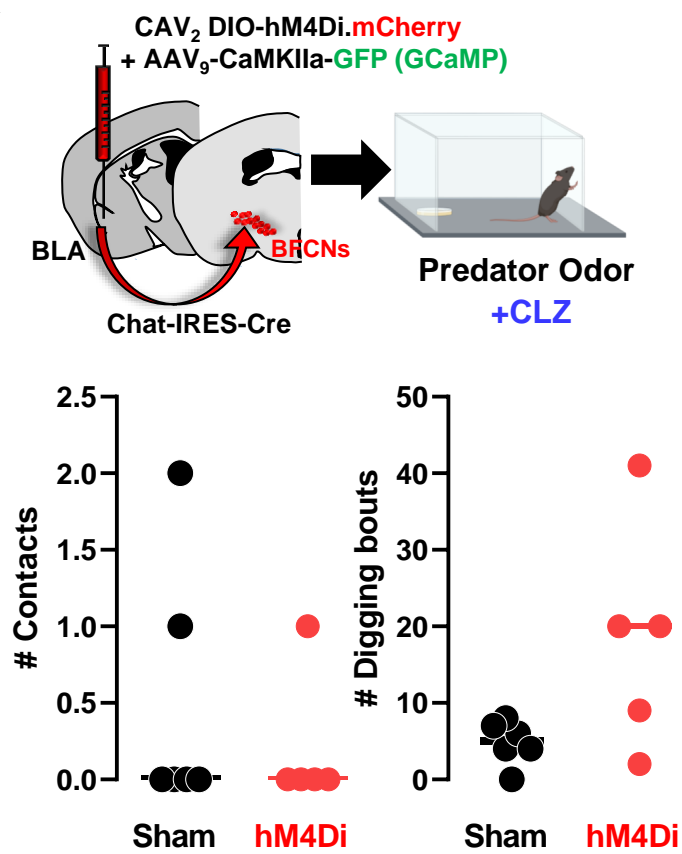

Supplement: supp [file elife-86581-supp-v1.zip]

Figure 5-Supplement 2

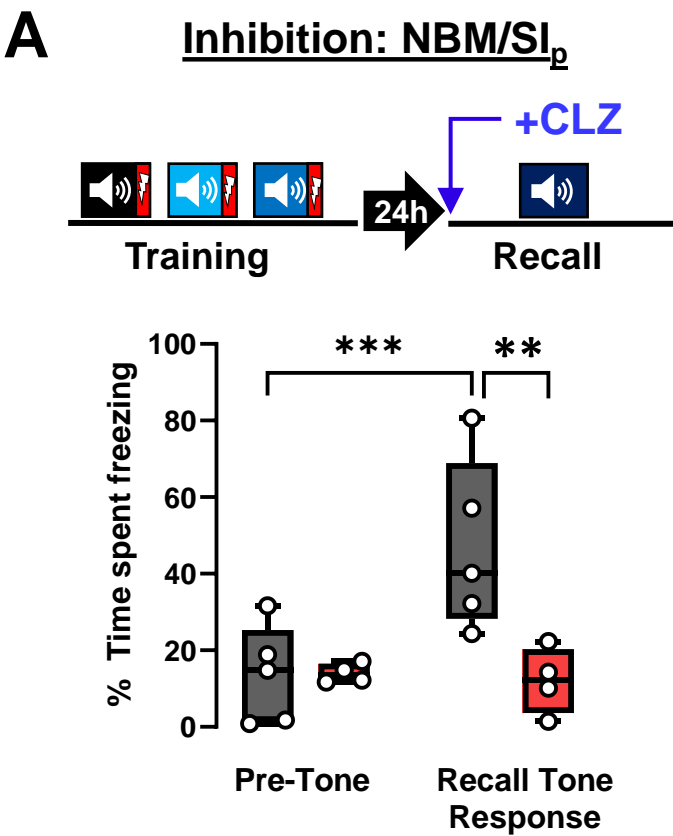

Supplement: supp [file elife-86581-supp-v1.zip]

Figure 1-Supplement 1

A

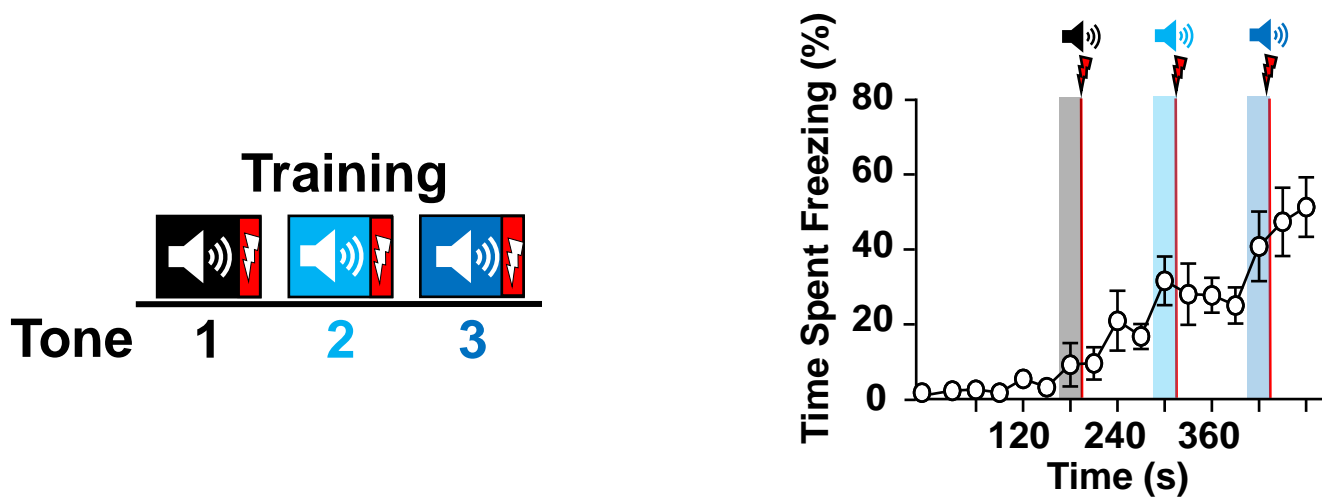

B

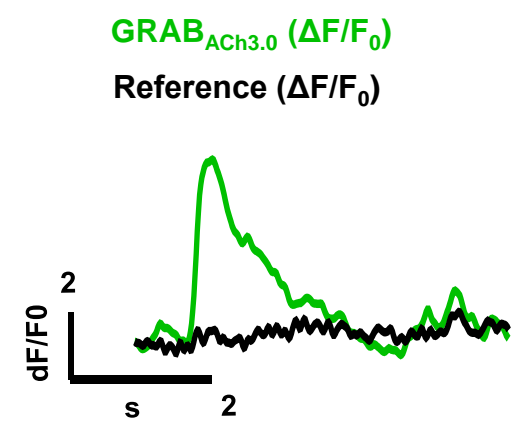

C

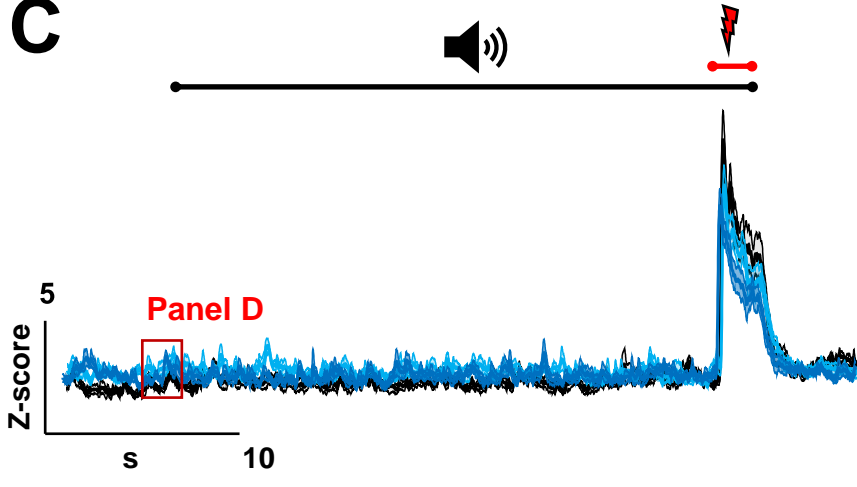

D

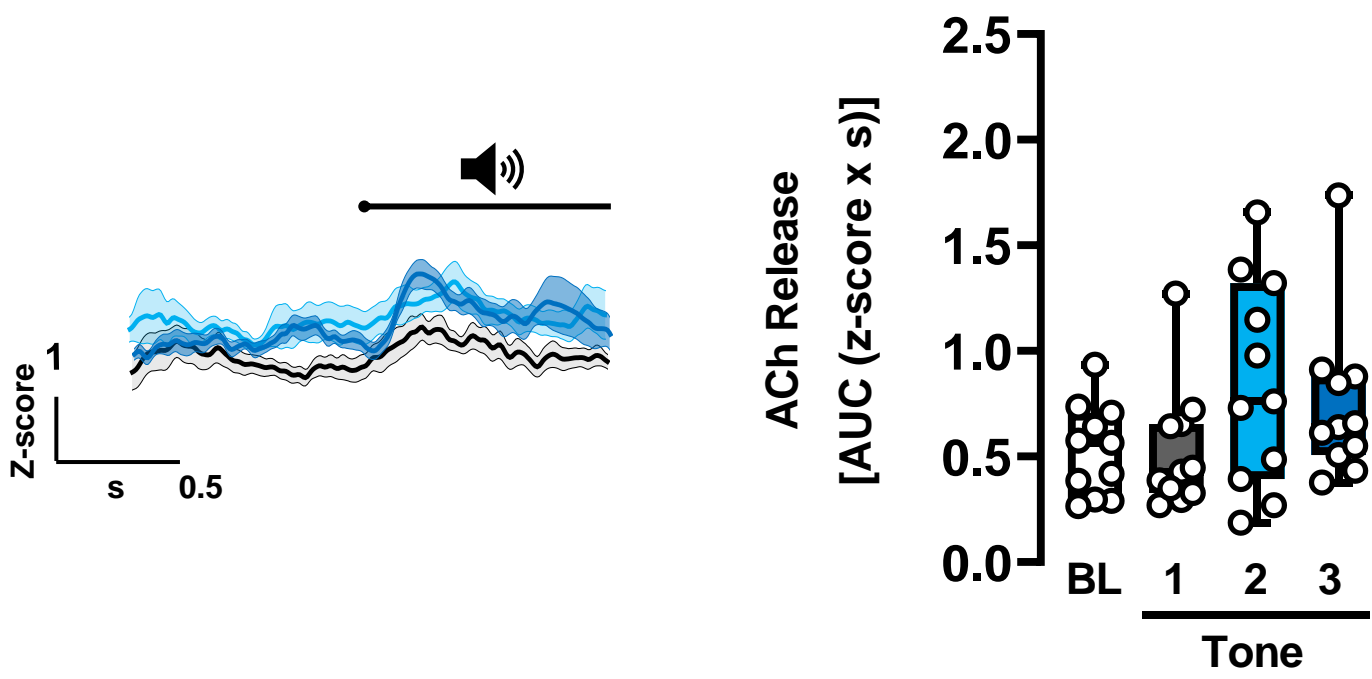

Supplement: supp [file elife-86581-supp-v1.zip]

# Figure 2-Supplement 1

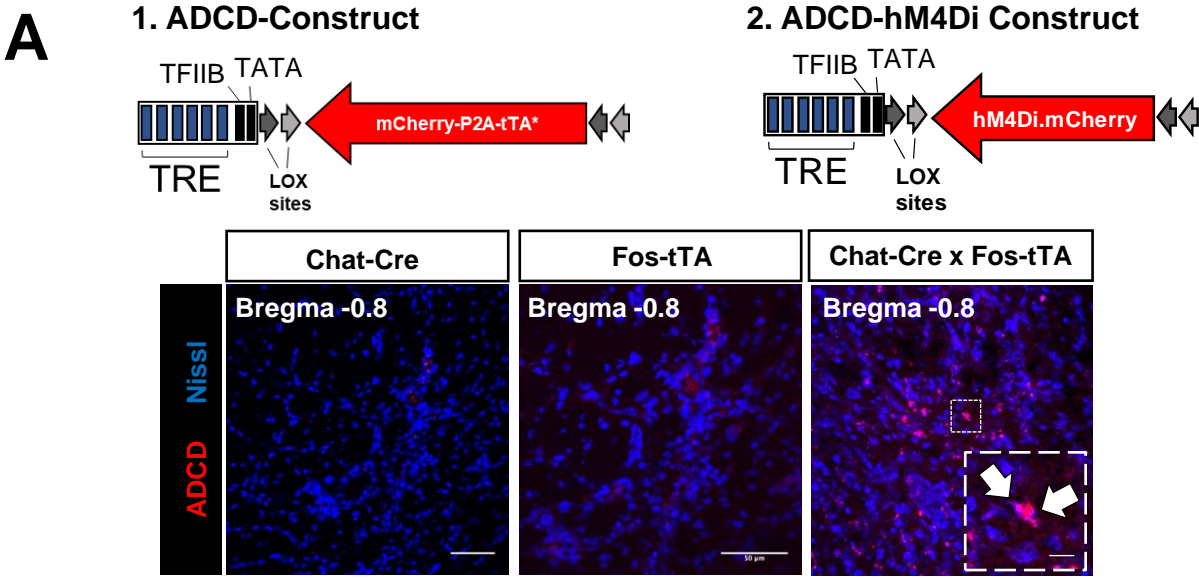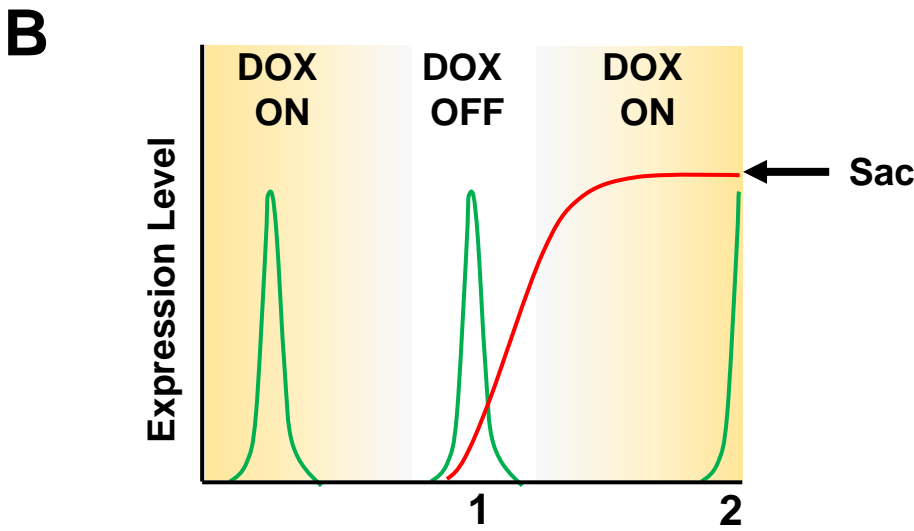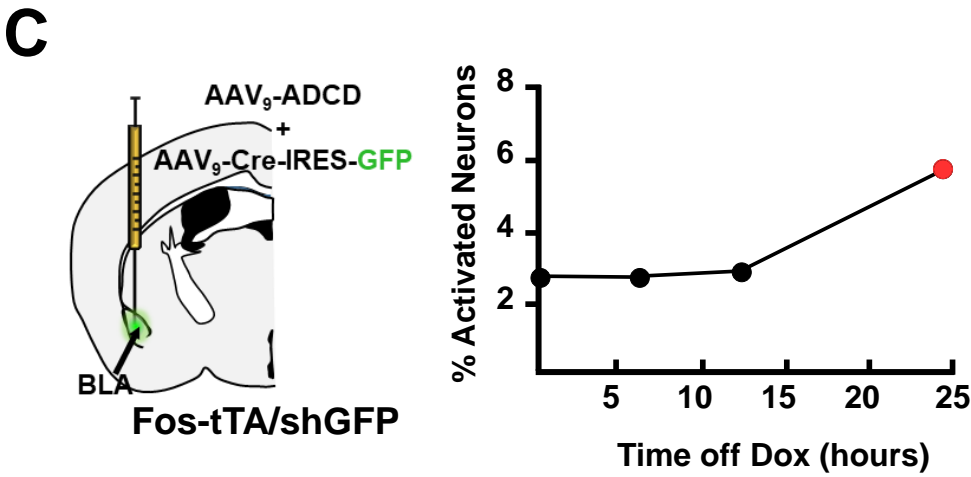

Supplement: supp [file elife-86581-supp-v1.zip]

Figure 1-Supplement 4

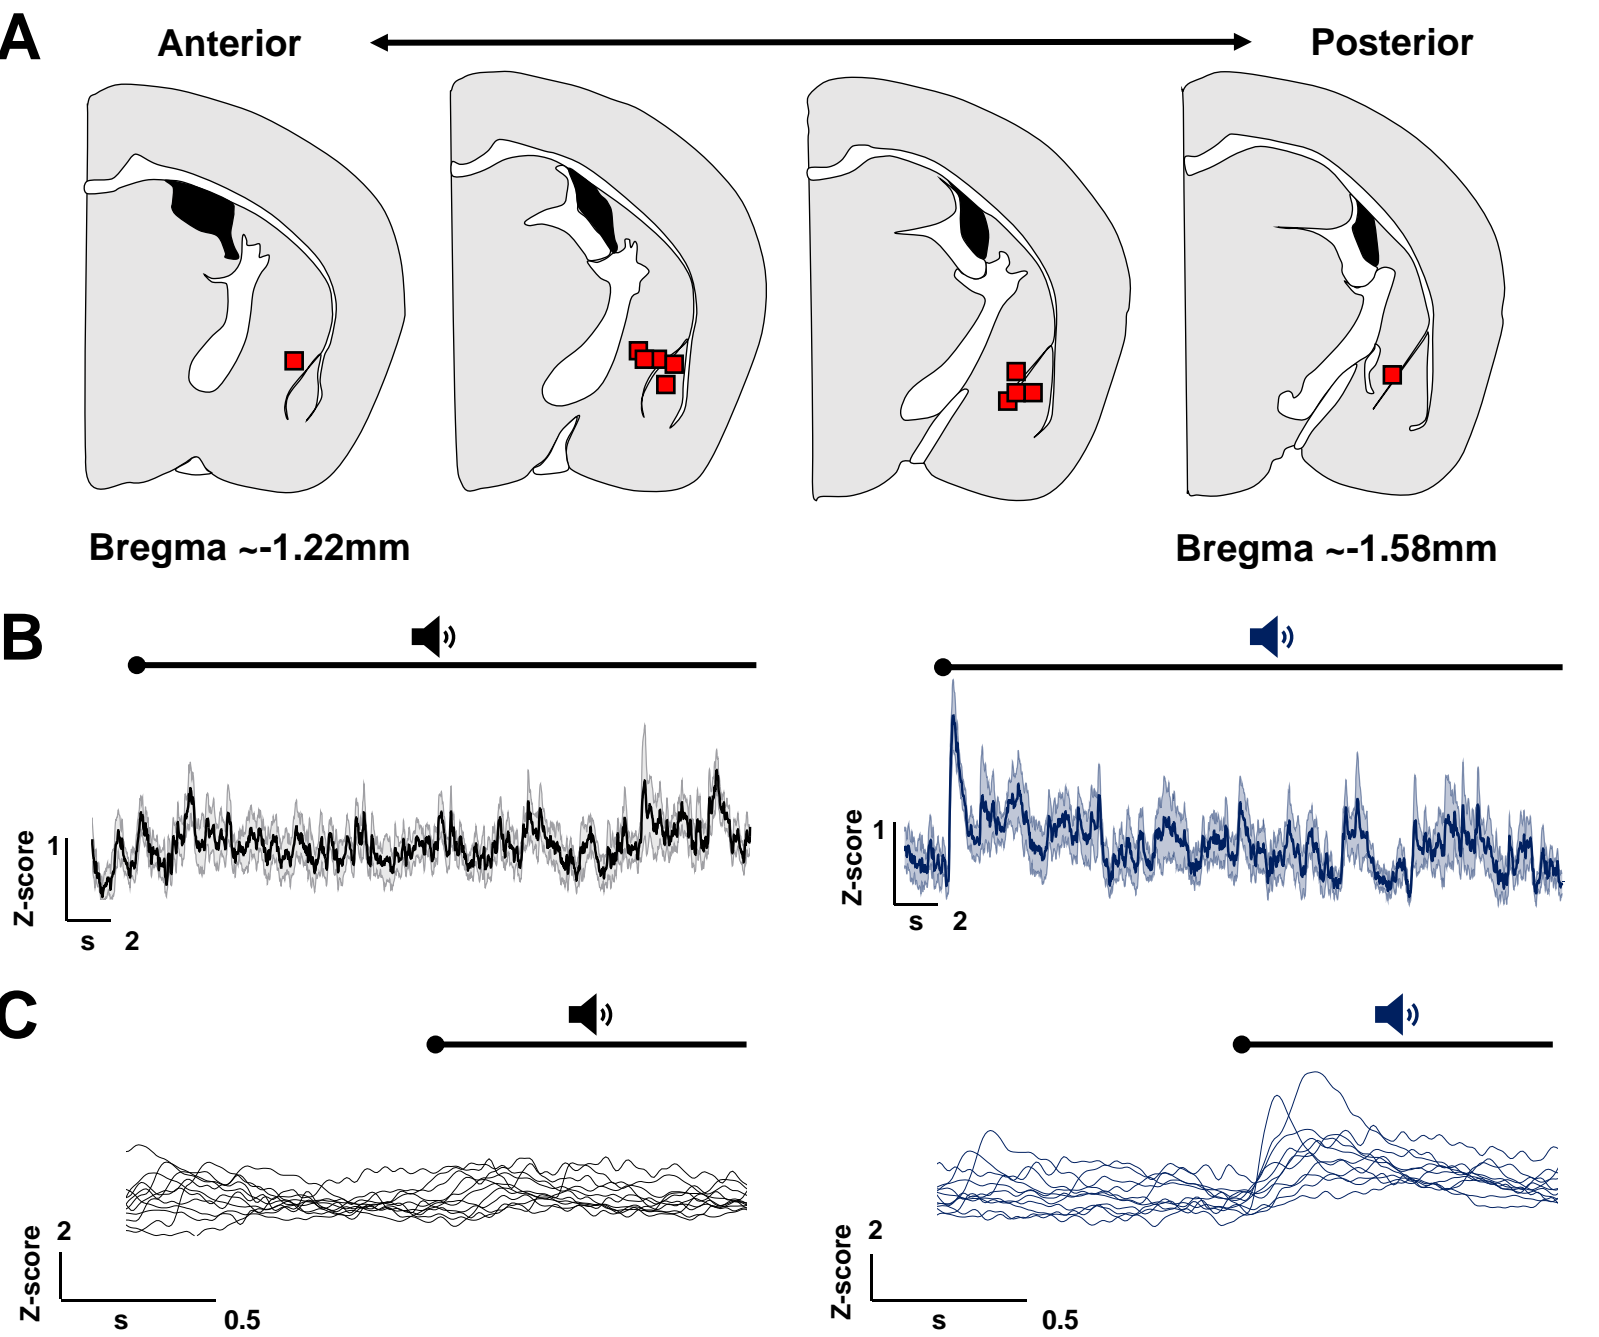

Supplement: supp [file elife-86581-supp-v1.zip]
